# Supplementary material for: Changes in addressing inequalities in access to hospital care in Andhra Pradesh and Maharashtra states of India: a difference-in-differences study using repeated cross-sectional surveys
Source: PubMed Central journal article supplement (PMC4054646; doi:10.1136/bmjopen-2013-004471), 2014-06-04
Supplement: bmjopen-2013-004471.draft_revisions.pdf [file bmjopen-2013-004471.draft_revisions.pdf]

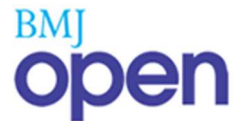

**Trends in addressing inequalities in access to hospital care:  
A tale of two Indian states**

|                                 |                                                                                                                                                                                                                                                                                                                                                                                                                                                                                                                                                                                    |
|---------------------------------|------------------------------------------------------------------------------------------------------------------------------------------------------------------------------------------------------------------------------------------------------------------------------------------------------------------------------------------------------------------------------------------------------------------------------------------------------------------------------------------------------------------------------------------------------------------------------------|
| Journal:                        | <i>BMJ Open</i>                                                                                                                                                                                                                                                                                                                                                                                                                                                                                                                                                                    |
| Manuscript ID:                  | bmjopen-2013-004471                                                                                                                                                                                                                                                                                                                                                                                                                                                                                                                                                                |
| Article Type:                   | Research                                                                                                                                                                                                                                                                                                                                                                                                                                                                                                                                                                           |
| Date Submitted by the Author:   | 19-Nov-2013                                                                                                                                                                                                                                                                                                                                                                                                                                                                                                                                                                        |
| Complete List of Authors:       | Rao, Mala; University of East London, Institute for Health and Human Development<br>Katyal, Anuradha; ACCESSHealth International,<br>Singh, Prabal; ACCESSHealth International,<br>Samarth, Amit; Sughavazhvu Healthcare,<br>Bergkvist, Sofi; ACCESSHealth International,<br>Kancharla, Manjusha; Indian School of Business,<br>Wagstaff, Adam; World Bank, Development Research Group<br>Netuveli, Gopalakrishnan; University of East London, Institute for Health and Human Development<br>Renton, Adrian; University of East London, Institute for Health and Human Development |
| <b>Primary Subject Heading</b>: | Public health                                                                                                                                                                                                                                                                                                                                                                                                                                                                                                                                                                      |
| Secondary Subject Heading:      | Health services research                                                                                                                                                                                                                                                                                                                                                                                                                                                                                                                                                           |
| Keywords:                       | Health economics < HEALTH SERVICES ADMINISTRATION & MANAGEMENT, Health policy < HEALTH SERVICES ADMINISTRATION & MANAGEMENT, PUBLIC HEALTH                                                                                                                                                                                                                                                                                                                                                                                                                                         |
|                                 |                                                                                                                                                                                                                                                                                                                                                                                                                                                                                                                                                                                    |

SCHOLARONE™  
Manuscripts

**TITLE PAGE****TITLE:**

**Trends in addressing inequalities in access to hospital care: A tale of two Indian states**

**STUDY DESIGN:** A cross-sectional difference in difference study with parallel control.

**AUTHOR NAMES, ADDRESSES AND POSITIONS:**

1.Mala Rao. Professor of International Health, Institute for Health and Human Development, University of East London, UK & Honorary Adviser, Administrative Staff College of India, Hyderabad

2. Anuradha Katyal, Consultant, ACCESS Health International, Hyderabad, India

3.Prabal V Singh, Director Research, ACCESS Health International, Hyderabad, India

4.Amit Samarth, Head, Strategy and Planning, SughaVazhvu Healthcare, Thanjavur, India

5.Sofi Bergkvist, Managing Director, ACCESS Health International, Hyderabad, India

6.Manjusha Kancharla, Research Associate, Indian School of Business, Hyderabad India

7.Adam Wagstaff, Research Manager, Human Development & Public Services team, Development Research Group (DECRG), The World Bank, Washington DC, USA

8.Gopalakrishnan Netuveli. Professor of Public Health, Institute for Health and Human Development, University of East London & ESRC International Centre for Life Course Studies in Society and Health, University College London, UK

9.Adrian Renton. Director, Institute for Health and Human Development, University of East London, UK

**Corresponding author and guarantor of the data and information:** Mala Rao (best email address: m.rao@uel.ac.uk).

**ABSTRACT. WORD COUNT: 294****OBJECTIVES**

To compare the effects of health innovations over time on access to and out of pocket expenditure (OOPE) on hospital inpatient care in Andhra Pradesh (AP) and Maharashtra (MH) states of India

**STUDY DESIGN**

A cross-sectional difference in difference (DID) study with parallel control.

**SETTING**

National Sample Survey Organisation of India urban and rural 'first stratum units', 863 in AP and 1008 in MH.

**PARTICIPANTS**

8623 households in AP and 10073 in MH

**MAIN OUTCOME MEASURES**

Average OOPE, large OOPE and large borrowing per household per year for inpatient care, hospitalisation rate per 1000 population per year.

**RESULTS**

Average expenditure, large expenditures and large borrowings on inpatient care had increased in both MH and AP, but the increase was smaller in AP across these 3 outcome measures. DIDs for average expenditure and large borrowings were significant and in favour of AP for the rural and the poorest households. Hospitalisation rates also increased in both states but more so in AP (5.6 per 1000 population vs 2.2), although the DID was not significant and the sub group analysis presented a mixed picture.

**CONCLUSIONS**

Health innovations in Andhra Pradesh had a greater beneficial effect on hospital inpatient care-related expenditures than innovations in Maharashtra. The Rajiv Aarogyasri Community Health Insurance scheme is likely to have contributed to these impacts in Andhra Pradesh at least in part. However, out of pocket expenditure increased in both states over time. Schemes such as the Aarogyasri and RSBY may result in some positive outcomes but, equity of access to health care and the reduction of the overall burden of out of pocket expenditure especially in the most vulnerable sections of the population are likely to require additional interventions that address gaps in the availability of and access to care.

**ARTICLE SUMMARY****STRENGTHS AND LIMITATIONS OF THE STUDY**

- This study uses a quasi-experimental design to compare changes between the Indian states of Andhra Pradesh and Maharashtra, in hospital inpatient care related expenditures and behaviours before and after the rollout of the Aarogyasri and RSBY schemes
- The study based on a survey of 18696 households has shown that health innovations in Andhra Pradesh had a greater beneficial effect on hospital inpatient care-related expenditures and access than innovations in Maharashtra. The Aarogyasri scheme is likely to have contributed to these impacts in Andhra Pradesh.
- The study also highlights the implications of the findings for policy and practice and additional interventions necessary to address gaps in the availability of and access to care.
- The study is only able to compare the effects of health innovations over time across the 2 states but does not allow the drawing of inferences on the impacts of individual initiatives.
- The study uses the difference in difference methodology and its findings may have been affected by unobservable differential changes between the 2 states.

**ACKNOWLEDGEMENTS:**

The study was funded by International Development and Research Centre, Canada, Wellcome Trust, the UK Department for International Development, and Rockefeller Foundation. The World Bank supported Adam Wagstaff's contribution to the study. We gratefully acknowledge the financial support of these organisations, as well as the enthusiastic encouragement we have received from them throughout the study. Our thanks also go to Bhimasankaram Pochiraju, Sundaresh Peri, C Ravi, and Rahul Ahluwalia for their advice and guidance at various stages of the study design and data analysis, and to colleagues at the University of East London and Administrative Staff College of India Hyderabad for their administrative support. The authors also thank P Suryanarayana, CM Reddy, D Chakrapani and K Pandu Ranga Reddy and AY Jadhav and his colleagues for their contribution to the training of the survey teams, verification of the survey and data collection and acknowledge the IMRB International Social Research Institute team's support in carrying out the survey.

We are grateful to Somil Nagpal and Joseph Kutzin for commenting on the report and helping us to improve it, to Sujatha Rao for her encouragement and valuable suggestions and ideas throughout the course of the study and to Jay Bagaria for her help during the early stage of the development of the proposal. Finally we thank PV Ramesh without whose constant support, guidance and encouragement, this study would not have been possible.

## INTRODUCTION

In 2005, member states of the World Health Organization (WHO) committed to develop their health financing systems to deliver universal coverage (UC); that is that all people have access to health services and do not suffer financial hardship paying for them<sup>1</sup>. WHO's 2010 World Health Report<sup>2</sup> recommended *inter alia* that countries reduce reliance on direct payments, and improve equity of access, including through the introduction of prepayment schemes. However, one recent systematic review of the impact of national health insurance schemes in low and middle income countries<sup>3</sup> found only weak evidence of increased use of healthcare and reduced out-of-pocket expenses, with the poorer benefitting less, whilst others<sup>4,5</sup> concluded that health insurance improved health care access and use, as well as financial protection in most cases but had no conclusive impact on health status. Both highlighted the need for more rigorous assessments of such schemes.

India has one of the highest levels of out-of-pocket health expenditure (more than 80% of private health expenditure)<sup>6</sup>. The aim of our study was to explore how recently introduced health financing initiatives have affected access to and out-of-pocket expenditure (OOPE) on inpatient hospital care in the Indian states of Andhra Pradesh (AP) and Maharashtra (MH).

## BACKGROUND

In its *Eleventh Five Year Plan (2007-12)*<sup>7</sup>, Government of India sought to increase Public Expenditure on Health and to strengthen investment in rural health infrastructure through the National Rural Health Mission. Its *Twelfth Five Year Plan (2012-17)*<sup>8</sup>, reflected the recommendation of the Planning Commission's High Level Expert Group for general taxation to be the principal source of health care financing. It proposed the development of government-funded health insurance schemes, building on the evidence from experimental schemes being introduced across many States. In India, health is primarily a state rather than national responsibility<sup>6</sup>. Whilst it is recognised that political will and good governance are essential, both the political mobilization of funds for health schemes and the effectiveness and efficiency of funded schemes will be enhanced by robust evidence which documents as to whether schemes achieve objectives, what works well and the main challenges they face.

In India, evaluation is not routine, even of large costly public health care programmes. Nevertheless, some assessments have been carried out, for example of the Yeshasvini Co-operative Farmers Health Care Scheme of Karnataka, the longest running state-supported health insurance scheme for the informal sector in India<sup>9</sup>, with promising results in terms of increased utilization of and reduced borrowing for health care services<sup>10</sup>. However, these early models covered small populations and offered limited benefits, so that the policy implications of conclusions drawn from even the best evaluations were unclear.

This scenario has changed during the past 5 years, with the launch of 2 schemes, the Rajiv Aarogyasri<sup>11</sup> Community Health Insurance Scheme (Aarogyasri) of Andhra Pradesh (AP) and Rashtriya Swasthya Bima Yojana (RSBY) currently offered in 30 states and union territories of India<sup>12</sup> including AP's neighbouring state of Maharashtra (MH). Their scale in terms of population coverage and range of treatments offered, significantly enhances their potential to inform India's road map towards universal health coverage. Both schemes belong to the new generation of publicly funded government-sponsored health insurance schemes, principally aimed at providing financial protection to the poor against catastrophic health shocks, which, for these schemes, the Government has defined as inpatient hospital care<sup>9</sup>. Both schemes have been subject to some assessment in their early phases, but a recent editorial<sup>13</sup> highlighted the necessity of further and repeated evaluations to enhance the credibility and accountability of existing schemes and to identify those which deserve scale-up. The Aarogyasri and RSBY schemes and the other recent health sector innovations in AP and

1  
2  
3 Maharashtra which form the major backdrop and complex health care architecture against which  
4 these have been launched, and which may have contributed to the changes in outcomes we have  
5 explored in our study, are described below.  
6

#### 7 *The Rajiv Aarogyasri Health Insurance Scheme of AP*

8 In 2007 AP launched a pioneering new state-wide fully state-funded health insurance scheme, the  
9 Rajiv Aarogyasri Community Health Insurance Scheme (Aarogyasri)<sup>11</sup> to provide treatment for  
10 serious and life-threatening illnesses. The specific objectives include: to improve access of poor  
11 families to quality 'tertiary' medical care (meaning low-frequency, high cost specialist care) and  
12 treatment of identified diseases requiring hospitalisation through an identified network of health  
13 care providers, to provide financial cover for catastrophic illnesses which have the potential to wipe  
14 out life time savings of poor families and to provide 'universal coverage to the urban and the rural  
15 poor in the state'<sup>14</sup> albeit for the conditions covered in the benefits package. All families with a  
16 'below poverty line' (BPL) ration card, i.e. those on an annual income below USD 1384 (INR 75,000)  
17 in urban areas and USD 1107 (INR 60,000) in rural areas, and including individuals with pre-existing  
18 medical conditions are *automatically* enrolled and the scheme was estimated to cover  
19 approximately 20.4 million poor and lower middle class families, comprising about 85 percent of the  
20 state's population in 2009<sup>9</sup>. Enrollees make no contribution, the annual benefit is a maximum of USD  
21 4,500 (INR 200,000) per family per year and there is no limit on the size of the family<sup>14</sup>. A total of 942  
22 medical and surgical procedures across 31 clinical specialties<sup>14</sup> are provided and the benefits include  
23 all inpatient costs - associated investigations, food, transport and medicines for 10 days following  
24 discharge. One year follow-up packages including consultation, medicines, and diagnostics are also  
25 available for 125 procedures requiring longer periods of follow up<sup>9</sup>. Aarogyasri has unique features  
26 including *Aarogyamithras* (health system navigators), outreach *health camps* delivered by  
27 participating hospitals to educate, screen and case-find and a state-of-the-art information  
28 technology-based management system. At the time of this study, 353 public and private sector  
29 hospitals were 'empanelled' to provide services to Aarogyasri beneficiaries.  
30  
31

32  
33 In 2009, a descriptive study of *Aarogyasri*, based on an analysis of claims data and a survey of  
34 beneficiaries<sup>15</sup>, concluded that while the scheme was beginning to reach its intended beneficiaries  
35 uptake was lower among scheduled castes and tribes. This was confirmed by Fan and colleagues<sup>16</sup>,  
36 who used variations in programme roll-out over time and districts to evaluate the scheme using  
37 National Sample Survey data collected before and after its launch. They reported reduced out-of-  
38 pocket expenditure in this initial phase but no major impact on catastrophic healthcare expenditure.  
39 Inspired by Aarogyasri and mindful of the political benefits of introducing popular health reforms,  
40 other states have launched health financing innovations similar to this model.  
41

#### 42 *RSBY in Maharashtra*

43  
44 RSBY was launched across a number of states by the Ministry of Labour, Government of India (GOI)  
45 in 2008<sup>17</sup> and provides access to free inpatient hospital care up to USD 550 (INR 30,000) per family  
46 per year<sup>18</sup>. Households which meet the criteria based on the much more limiting definition of  
47 poverty and numbers of poor families provided for each State by the GOI Planning Commission are  
48 eligible to enrol, and pay a contribution of USD 0.55 (INR 30) at registration and at each annual  
49 renewal<sup>9</sup>. Up to 5 family members, including those with pre-existing conditions can be covered, and  
50 personal information including biometric data are collected prior to the issue of a smart card with  
51 encoded details of the family. 700 procedures covering 18 broad categories of interventions which  
52 would generally be included under the umbrella of 'secondary' care, are provided and the benefit  
53 packages include the intervention, public transport costs limited to 1.8 USD (INR 100) per visit and  
54 18.2 USD (INR 1000) per year and post-hospitalization drugs for 5 days. Networked hospitals are  
55 required to provide free outpatient consultations (which have only recently been introduced.  
56 Personal communication, Kurian OC) but other costs such as ambulatory diagnostics and medicines  
57  
58  
59  
60

1  
2  
3 have to be borne by the beneficiaries, except if investigations lead to inpatient admissions within a  
4 day<sup>9</sup>. A pilot of the RSBY scheme was launched in 1 district of AP, but only after the start of our  
5 household survey.  
6

7  
8 In Maharashtra, enrolment began in Aug 2009, and by mid 2013, approximately 2 million of the  
9 eligible 4 million families were enrolled in the scheme<sup>12</sup> which is being implemented in 31 of 35  
10 districts in the state. Enrolment had extended to 26 districts prior to June 2012, when our household  
11 survey began. Notably, only 15 out of 1215 hospitals contracted for RSBY funded services are from  
12 the public sector<sup>12</sup>. Early assessments of the scheme's impact nationally, suggest that although the  
13 rate of hospitalisations has increased, awareness of the scheme was poor and remains a barrier to  
14 uptake. Notable variations in enrolment and scheme awareness were also observed by a descriptive  
15 study of RSBY conducted in the Amravati district of Maharashtra which has a large tribal  
16 population<sup>19</sup>. In Maharashtra<sup>17</sup>, utilisation rates have been reported to be lower than in other states  
17 and the male:female enrolment ratio is 6.5:3.5.  
18

#### 19 *Other major health sector initiatives in AP and Maharashtra*

20 Both states have a complex health care landscape with numerous programmes in place. There are  
21 several initiatives launched during the past decade, some of which are common to both states and  
22 driven by national strategies, and others owe their existence to state-level enterprise, innovation  
23 and political support. The most notable programmes with the potential to impact on in patient care  
24 are described below.  
25

26  
27 The National Rural Health Mission (NRHM) was launched in 2005 nationwide, with a key aim of  
28 reducing maternal and infant mortality<sup>20</sup>. Government reports suggest that its notable achievements  
29 include an increase in institutional deliveries; in AP from 1.25 million in 2005-06 to 1.46 million by  
30 2011-12<sup>21</sup> and in MH from 1.1 million to 1.63 million<sup>22</sup>, achieving an institutional delivery rate of  
31 approximately 92 percent in both states. Also common to both states is the '104 health information  
32 help line' launched in AP in 2008 and MH in 2011<sup>23</sup>, to provide medical advice and information based  
33 on validated algorithms and disease summaries, direct callers to appropriate health facilities or to  
34 receive a complaint against a public sector health facility. In AP the help line and call centre were  
35 subsumed within the Aarogyasri infrastructure by 2011.  
36

37  
38 In MH, the RSBY was preceded by the Jeevandayee scheme launched in 1997 with the objective of  
39 reducing catastrophic OOPE on inpatient care in the BPL population<sup>24</sup>. Potential beneficiaries were  
40 required to apply for funding after a diagnosis was confirmed and the scheme covered serious illness  
41 such as cardiac and renal disease and cancer. However, the scheme uptake has been low, and while  
42 it has continued to run in parallel to the RSBY, only 66,853 procedures (4456 procedures per year in  
43 a state with 112.37 million people) have been approved during the scheme's lifetime<sup>25</sup>. Since 2006,  
44 MH has also had a scheme in place which mandated 20% of the beds in private hospitals to be made  
45 available for free or at subsidized rates to poor patients (personal communication, Kurian OC). It has  
46 been estimated that around 10,000 private beds are available for the poor across MH, equivalent to  
47 approximately 20% of the total bed capacity of the public sector. Although the implementation of  
48 the scheme is reported to be erratic (Kurian OC), it may have had some positive impact on access to  
49 hospital inpatient care for serious illness.  
50

51  
52 Launched in 1995-96, the Navasanjeevani Yojana scheme is exclusive to the 15 tribal districts of MH  
53 and was to improve maternal and infant mortality in these vulnerable populations<sup>26</sup>. It has focused  
54 on strengthening primary health and nutrition services and access to safe drinking water.

55  
56 A service available in AP but not in MH is the '108' scheme, launched in 2005 to provide a state-of-  
57 the-art medical emergency response service<sup>27</sup>. At the time of our study, 802 ambulances catered to  
58 approximately 3,500 emergencies per day<sup>28</sup>.  
59  
60



## OBJECTIVES OF THE STUDY

Our objective was to compare the effects of health innovations over time on access to and OOPE on inpatient care in AP and MH and to assess whether the AP initiatives had larger or smaller beneficial effects than those found in MH. These differential effects are likely to be substantially due to the Aarogyasri scheme in AP and the RSBY in MH. In this paper, we report findings from a study which compared these trends. The findings do not allow us to draw inferences on the impacts of individual initiatives, but nevertheless contribute new knowledge on the impact and role of the innovations, provide lessons for other programmes, and strengthen the evidence base for policy on UC in India.

## METHODS

### Overview

None of the aforementioned initiatives – including the Aarogyasri and RSBY schemes in which we are especially interested – was piloted in a systematic way, let alone via a carefully designed randomized control trial. Following MRC Guidance<sup>29,30</sup> and best practice we therefore opted for a quasi experimental design in which we seek to minimise selection bias, to control for confounding variables and to reduce the effects of chance. Specifically, we compare changes in hospital inpatient care related expenditures and behaviours (HREB) in AP and MH before and after the rollout of the Aarogyasri scheme in AP and the RSBY scheme in MH. The difference in changes between AP and MH is not an estimate of a specific initiative. Rather it tells us whether, on balance, the AP initiatives have had larger (or smaller) beneficial effects than the MH initiatives, and if so how much more (or less) beneficial they have been. Since the NRHM was common to both states and the MH-specific initiatives were quite small in scale or unlikely to affect HREBs, any difference in change between the two states is quite likely to be mainly due to differential effects of the Aarogyasri and RSBY programmes.

AP and MH have a similar development profile (Figure 1). AP's other socio-economically similar neighbouring states of Karnataka and Tamil Nadu had already introduced Aarogyasri-like schemes, and Odisha and Chattisgarh the only other neighbours, had comparatively higher levels of socio-economic deprivation. HREBs were measured in both AP and MH by two waves of household survey before (2004) and after (2012) the introduction of Aarogyasri and RSBY. The study protocol and questionnaire for the 2012 survey were reviewed and agreed by the Research Ethics Committee of the Administrative Staff College of India, Hyderabad.

Figure 1. Location of and selected indicators for Andhra Pradesh and Maharashtra

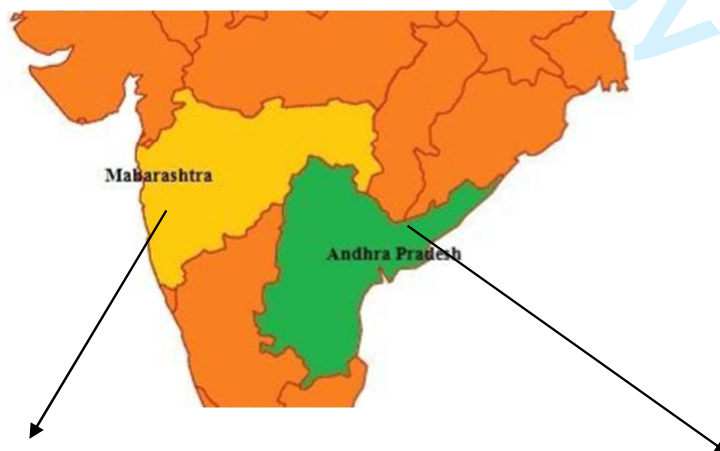

| Maharashtra | Indicator                                                   | Andhra Pradesh |
|-------------|-------------------------------------------------------------|----------------|
| 112.37      | Population (2011 census, in millions)                       | 84.66          |
| 10.20       | % Schedule Caste ( 2001 Census)*                            | 16.60          |
| 8.90        | % Schedule tribe ( 2001 census)*                            | 6.20           |
| 101,314     | Per capita income 2011-12 (in INR)**                        | 71,540         |
| 35          | Number of districts                                         | 23             |
| 5,314       | Households covered in NSSO 60 <sup>th</sup> round (2004-05) | 5,059          |
| 10,073      | Households covered in the study 2012                        | 8,623          |

\*Note that 2011 census data for social groups are not yet published

\*\*Source: Presentation on Annual Plan 2012-13 and Five Year Plan 2012-17<sup>31</sup>

### Survey design

#### Baseline Survey : 2004

We used the original data from the National Sample Survey Organization (NSSO) 60<sup>th</sup> decennial round household survey undertaken in 2004<sup>32</sup> to estimate baseline HREB estimates for AP and MH (Table 1). This was the most recent round measuring morbidity profiles, use of health care services including hospitalised and non-hospitalised treatments and expenditures incurred. The household survey used a multi-stage stratified sampling methodology to identify a representative random population sample and an interviewer completed questionnaire to obtain measures of HREB along with socio-demographic, household expenditure and other information. (see Online Appendix for full technical details of sampling method and full questionnaire).

#### Follow up survey: 2012

We used the same household survey design and methods to collect post-intervention data in AP and MH as those used by NSSO. Briefly, the household survey used a multi-stage stratified sampling methodology with the 'First Stage Units' (FSUs) identical to those used by NSSO in their 66<sup>th</sup> round (2008-09)<sup>33</sup>, the latest round for which FSUs had been mapped. However, the FSUs were not the same as those in NSSO 2004, our baseline survey, rapid urbanisation having changed substantially, the urban-rural landscape of both states and thus the geographical basis for sampling units.

**Table 1: Urban and rural populations and households surveyed in 2004 and 2012 in Andhra Pradesh and Maharashtra**

|                          | Andhra Pradesh             |                    | Maharashtra                |                    |
|--------------------------|----------------------------|--------------------|----------------------------|--------------------|
|                          | NSSO 60th round<br>2004-05 | Our survey<br>2012 | NSSO 60th round<br>2004-05 | Our survey<br>2012 |
| Population               | 76,210,007*                | 84,665,533**       | 96,878,627*                | 112,372,972**      |
| Urban population         | 20,808,940*                | 28,353,745**       | 41,100,980*                | 50,827,531**       |
| Rural population         | 55,401,067*                | 56,311,788 **      | 55,777,647*                | 61,545,441**       |
| Total households (urban) | 4,397,138*                 | 6,778,225**        | 8,403,224*                 | 10,813,928**       |
| Total households (rural) | 12,607,167*                | 14,246,309**       | 11,173,512*                | 13,016,652**       |
| Total households         | 17,004,305*                | 21,024,534**       | 19,576,736*                | 23,830,580**       |
| FSUs (urban)             | 183                        | 372                | 267                        | 504                |
| FSU (rural)              | 325                        | 491                | 265                        | 504                |
| Total households         | 1824                       | 3715               | 2664                       | 5038               |

|                                  |      |      |      |      |
|----------------------------------|------|------|------|------|
| surveyed (urban)                 |      |      |      |      |
| Total households covered (rural) | 3235 | 4908 | 2650 | 5035 |

\*2001 census \*\* 2011 census

FSU - First Stratum Unit

The NSSO 66th round had 492 rural FSUs in AP, but 1 FSU was found to be uninhabited.

The interviewer completed household survey questionnaire was pre-tested and then piloted in both states prior to the survey. All respondents provided written informed consent for participation. Questions addressed the following: household composition and socio-demographic characteristics of members, household expenditure, and health expenditure (outpatient and inpatient) and means of its financing, healthcare seeking behaviour, factors affecting access to healthcare and awareness and perceptions of the quality of the *Aarogyasri* scheme (AP only). The survey questions in 2012 were identical to those from the NSSO 2004<sup>34</sup>. Additional questions specific to the *Aarogyasri* and other relevant schemes were also added.

A survey of 18696 households across 2 states and 1871 locations within the states is a challenging undertaking. The survey design had several features intended to assure the quality of data collected. Few academic institutions have internal capacity to carry out such large surveys, and consequently, the Social and Research Institute of IMRB International, a leading market research agency was selected to carry out the survey. The Institute has field survey teams based in every Indian state, conversant in local languages and dialects and trained to carry out surveys in the socio-economic development sector. Its clients include Government of India (for whom the national Family Health Survey data are collected), World Bank and other UN organisations. A group of NSSO consultants in AP and the Indian Socioeconomic Research Unit, Pune were recruited to support the training of the field survey teams and data verification.

We planned three levels of verification of the study data; the first to be undertaken by the survey agency, the second to be carried out by the study team and the third, by the agencies mentioned above. Survey teams for each district were accountable to a field supervisor who was responsible for checking both the household listing and data entry on a daily basis. The study team also accompanied the field staff to survey sites on a regular basis. Data collected from 250 households in each state (approximately 2.5% of the surveyed households) and 186 of the FSU listings (approximately 10%) were independently verified by the agencies in both the villages and urban blocks in order to ensure that the sampling method and administration of the questionnaire survey were being correctly applied. The data entry was carried out by the Institute using a double entry method and any questionnaires reported incorrect were sent back to the field for re-survey. The research team carried out a final validation and review of the data.

#### *Outcome measures*

*Average inpatient (IP) expenditure per household per year.* Average out-of-pocket expenditure for inpatient care during 1 year prior to the survey was estimated from questionnaire responses for AP

and MH from both baseline and follow-up data. Reimbursements for inpatient expenditure were deducted from the total where households had received them.

*Large out-of-pocket inpatient expenditure.* Because of the limited data on household consumption in the 2004 NSSO health survey we did not estimate 'catastrophic health expenditure'. Instead, we constructed a measure of 'large' out-of-pocket expenditure. The Aarogyasri Health Care Trust data on expenditure incurred by the Government of AP per case in 2012 were examined<sup>14</sup> and the mean was estimated as USD 419 (INR 23,000). A household was deemed to have incurred 'large' expenditure if OOPE for inpatient care was equal to or greater than this threshold.

*Large borrowing.* We estimated the total amount borrowed by a household to meet the expenditure of all the inpatient episodes of that family during the previous year. A household was considered to have incurred 'large borrowing' if the borrowing was equal to or exceeded the BPL threshold set by Government of AP: INR 70000 for urban families and INR 65000 for rural households. These prices have been deflated to 2004 levels.

*Hospitalisation rate.* This was estimated as the number of individuals hospitalised during the previous year, per 1000 population.

Variations in outcomes were examined between male and female-headed households, and rural and urban populations, as well as across social groups and economic groups represented by asset quintiles.

Because of the limited data on household consumption in the 2004 NSSO health survey which made the estimation of wealth difficult, we have opted instead to measure household living standards using an asset or wealth index based on information on ownership of household durables, dwelling type, etc., using principal component analysis to estimate weights<sup>35, 36, 37</sup> for each indicator. The indicators used were limited to those collected in the 2004 NSSO: type of structure of the dwelling unit, type of toilet, type of fuel used for cooking and source of drinking. Data from the 2004 and 2012 surveys were pooled so that the index captures changes in living standards between the two years; there are therefore more households in the top quintile in 2012 than in 2004. The statistical software Stata 11 was used to generate the index.

*Deflation of follow-up expenditure estimates.*

The 2012 expenditure data including the threshold for large expenditures were deflated using the consumer price index of the Government of India<sup>38</sup> to reflect 2004 prices.

*Analysis*

Our repeat cross-sectional surveys do not allow estimation of within-individual household changes in outcomes over time. Our analysis therefore focused on estimating outcomes averaged across states, and in comparing changes in these over time between AP and MH. If we assume that outcome determinants other than Aarogyasri and RSBY remained stable in the two states over time or followed a parallel trend, then a difference-in-difference (DID) analysis will uncover the net effect of Aarogyasri over and above RSBY.

The difference in differences of outcome ( $Y_{DD}$ ) is

$$(Y_{2012}^{AP} - Y_{2004}^{AP}) - (Y_{2012}^{MH} - Y_{2004}^{MH})$$

where the subscripts and superscripts for Y refer to the respective states and the years when the surveys were done. Confidence intervals were calculated from the standard error  $Y_{DD}$  of and the p-

value for the null-hypothesis ( $Y_{DD} = 0$ ) was tested using the Wald test as  $t = \frac{Y_{DD}}{SE_{Y_{DD}}}$  with one degree of freedom.  $Y_{DD}$  was estimated using ordinary least square regression:

$$y_{it} = \beta_0 + \beta_1 state_i + \beta_2 survey_t + \beta_3 (state * survey)_{it} + \sum_{k=1}^m \beta_{3+k} covariate_k + \varepsilon$$

The basic DID results are obtained using the above regression with covariates excluded. The adjusted DID results are obtained using the above regression with  $m=9$  covariates, namely the gender of head of household, a dummy variable capturing whether the household lives in a rural or urban location, three dummy variables capturing the household's social group (the lowest is the excluded category), and four asset quintile dummies (the bottom is the excluded category). In the regression  $y_{it}$  is the outcome,  $state$  is a dummy variable with 0 for MH and 1 for AP, and  $survey$  is a dummy variable with 0 for 2004 survey and 1 for 2012 survey. The coefficient for the interaction term,  $\beta_3$ , gives the differences in differences estimate,  $Y_{DD}$ . Robust standard errors of  $Y_{DD}$  were calculated to account for clustering of households within FSUs using Stata survey commands. A positive value for  $Y_{DD}$  suggested that the change in the outcome in AP was more than the change in MH and the negative value would suggest the reverse.

Sub groups were not mutually adjusted for the analysis due to sample size restrictions in relation to some of them.

#### *Role of the funding sources*

The external funding sources had no role in study design, data collection, analysis, interpretation or reporting, or in submission decision.

## RESULTS

A total of 5314 and 5059 households from Maharashtra and AP were surveyed by the NSSO in 2004 (Table 2). Our survey in 2012 included 10073 (MH) and 8623 (AP) households.

**Table 2. Socio-demographic characteristics of baseline and follow-up samples**

| Subgroups                | Number (%) of Households 2004 |                | Number (%) of Households 2012 |                |
|--------------------------|-------------------------------|----------------|-------------------------------|----------------|
|                          | Maharashtra                   | Andhra Pradesh | Maharashtra                   | Andhra Pradesh |
| <b>All</b>               | 5314                          | 5059           | 10073                         | 8623           |
| <b>Head of Household</b> |                               |                |                               |                |
| Male                     | 4785 (90.0)                   | 4433(87.6)     | 8543(84.8)                    | 7418(86.0)     |

|                       |              |              |              |              |
|-----------------------|--------------|--------------|--------------|--------------|
| Female                | 529 (10.0)   | 626 (12.4)   | 1530 (15.2)  | 1205 (14.0)  |
| <b>Social Group</b>   |              |              |              |              |
| Scheduled Tribes      | 413 (7.8)    | 296 (5.9)    | 1364 (13.5)  | 883 (10.2)   |
| Scheduled Castes      | 809 (15.2)   | 974 (19.3)   | 2235 (22.2)  | 1797 (20.8)  |
| Other Excluded        | 1644 (30.9)  | 2317 (45.8)  | 1899 (18.9)  | 3419 (39.7)  |
| All other Groups      | 2448 (46.1)  | 1472 (29.1)  | 4571 (45.4)  | 2524(29.3)   |
| <b>Location</b>       |              |              |              |              |
| Rural                 | 2,650 (49.9) | 3235 (63.9)  | 5035(50.0)   | 4908 (57.0)  |
| Urban                 | 2664 (50.1)  | 1824 (36.1)  | 5038 (50.0)  | 3715(43.0)   |
| <b>Asset Quintile</b> |              |              |              |              |
| Lowest                | 1,260 (23.7) | 1,594(31.5)  | 996(9.9)     | 826(9.6)     |
| Second                | 1,016 (19.1) | 1,237 (24.5) | 1,841(18.2)  | 1,286(14.9)  |
| Third                 | 772 (14.5)   | 753(14.9)    | 2,228(22.1)  | 2,121(24.60) |
| Fourth                | 857 (16.1)   | 744(14.7)    | 2,373 (23.6) | 3,072(35.6)  |
| Fifth                 | 1,408(26.5)  | 730(14.4)    | 2,633(26.1)  | 1,318(15.3)  |

### Changes in average in-patient expenditure

Table 3 (top panel) shows average baseline levels of inpatient expenditure. The table also shows the real terms change (deflated to 2004 prices) in these outcomes at follow up and the difference in difference (DID) estimate comparing AP with MH. DID's for overall results are shown unadjusted, as well as adjusted for the effects of the covariates. Breakdowns by sex of head of household, social group, urban/rural location and asset quintiles are also shown.

Overall, average inpatient expenditure increased in real terms in both the states between 2004 and 2012, but the increase was significantly greater in MH (unadjusted DID= -498.2 INR, 95% CI= -792.9: -203.5, p=0.0009). The trend of a greater increase in MH was evident across all sub groups of analysis except the richest asset quintile. However, the DID's reached significance in male headed households (DID=-513.7INR, 95% CI= -843.9: -183.4, p=0.0023), scheduled castes (DID= -708.7INR , 95% CI=-1234.3: -183.2, p=0.0082), all 'other' social groups (DID=-1110.46INR, 95% CI=-1868 : -352.9, p=0.0041), rural households (DID= -504 INR, 95% CI= -801.9: -206.0, p=0.0009) and the poorest (DID= -1001.3 INR, 95% CI= -1751: -251.7, p= 0.0089) and middle asset quintiles (DID= -798.1 INR, 95% CI= -1362.9:-233.3, p= 0.0056).

**Table 3: Change in average inpatient expenditure (in INR) in Maharashtra and Andhra Pradesh between 2004 and 2012**

| Subgroups                              | Baseline Mean (95% CI) |                | Change 2004:2012 Mean (95% CI) |                | DID          |   |
|----------------------------------------|------------------------|----------------|--------------------------------|----------------|--------------|---|
|                                        | Maharashtra            | Andhra Pradesh | Maharashtra                    | Andhra Pradesh | Mean (95%CI) | p |
| <b>Household inpatient expenditure</b> |                        |                |                                |                |              |   |

|                          |                         |                      |                       |                        |                                      |        |
|--------------------------|-------------------------|----------------------|-----------------------|------------------------|--------------------------------------|--------|
|                          |                         |                      |                       |                        | -498.2(-792.9:-203.5)                | 0.0009 |
| <b>All</b>               | 1091.6(978.4:1204.8)    | 723.5(527.5:919.5)   | 942.8(749.9:1135.6)   | 444.55(221.5: 667.6)   |                                      |        |
|                          |                         |                      |                       |                        | <b>DID (adjusted for covariates)</b> |        |
|                          |                         |                      |                       |                        | -565.8(862.9:-268.6)                 | 0.0002 |
| <b>Head of Household</b> |                         |                      |                       |                        |                                      |        |
| Male                     | 1,132.9(1015:1,251)     | 758(419.7:1,096.3)   | 935(727:1,143.01)     | 1074.9(555.9:1593.8)   | -513.7(-843.9:-183.4)                | 0.0023 |
| Female                   | 757.1(555.5:1014.6)     | 341.1(222.3:460.01)  | 421.3(164.7:678.0)    | 589.9(307.22:872.8)    | -484.9(-1075.6:105.9)                | 0.1076 |
| <b>Social Group</b>      |                         |                      |                       |                        |                                      |        |
| Scheduled Tribes         | 376.6(231.7:521.6)      | 432.7(212.52:652.9)  | 1153.1(803.3:1502.9)  | 675.2(163.2:1187.2)    | -477.9(-1097.7:142)                  | 0.1307 |
| Scheduled Castes         | 696.7(500.2:893.2)      | 432.6(305.6:559.4)   | 1464.1(1039.9:1888.4) | 755.4(444.9:1065.9)    | -708.7(-1234.3:-183.2)               | 0.0082 |
| Other Excluded           | 1,028.6(838.4:1218.8)   | 562.4(463.7:662)     | 928.9(532.9:1324.9)   | 767.9(569.6:966.2)     | -161(-603.7:281.7)                   | 0.4758 |
| All other Groups         | 1,424.5(1,222.3:1626.7) | 1306.2(627.8:1984.6) | 734.9(427.9:1041.7)   | -375.6(-1,068.5:317.4) | -1110.46(-1868:-352.9)               | 0.0041 |
| <b>Location</b>          |                         |                      |                       |                        |                                      |        |
| Rural                    | 897.8(768.1:1027.5)     | 571.4(496.2:646.6)   | 1084.7(826.3:1343.1)  | 580.7(432.2:729.2)     | -504(-801.9:-206.0)                  | 0.0009 |
| Urban                    | 1343.5(1146.1:1540.9)   | 1113.5(466.2:1760.8) | 753.6(458.7:1048.6)   | 92.3(-586.92:771.5)    | -661.3(-1401.5:78.864)               | 0.0799 |
| <b>Quintile</b>          |                         |                      |                       |                        |                                      |        |
| poorest                  | 656.3(498.0:814.6)      | 391.5(319:464.1)     | 1692.5(1053.3:2331.7) | 691.2(298.9:1083.5)    | -1001.3(-1751:-251.7)                | 0.0089 |
| 2nd                      | 786.5(583.5:989.5)      | 443.3(356.5:530.2)   | 979.3(599.4:1359.2)   | 839.5(465.7:1213.3)    | -139.8(-672.5:393)                   | 0.607  |
| middle                   | 1062.7(738.8:1386.1)    | 862.1(577.8:1146.5)  | 1011.8(550.2:1473.4)  | 213.7(-112.1:539.6)    | -798.1(-1362.9:-233.3)               | 0.0056 |
| 4th                      | 1241.7(894.4:1589.1)    | 1819(337.5:3302.5)   | 803.6(328.7:1278.5)   | -644.3(-2128.3:839.7)  | -1447.9(-3005.2:109.5)               | 0.0684 |
| richest                  | 1818.6(1505.5:2131.8)   | 908.3(682.1:1133.4)  | 252.3(-193.4:698.1)   | 362.1(15.3:708.9)      | 109.7(-454.80:674.3)                 | 0.7031 |

### Large expenditures for inpatient care

Proportions of households incurring large expenditures showed an increase in both states (Table 4), but the increase was smaller in AP for the sample as a whole as well as for all the groups except for the second asset quintile. The DID was strongly significant for the households overall (adjusted DID=-1.8, 95% CI: -3:-0.7, p= 0.0009), but this was not observed for any of the sub groups of analysis.



**Table 4: Change in the proportion (%) of households incurring large health expenditures for in-patient care in Maharashtra and AP between 2004 and 2012**

| Subgroups                                                        | Baseline Mean (95% CI) |                | Change 2004:2012 Mean (95% CI) |                   | DID                                  |        |
|------------------------------------------------------------------|------------------------|----------------|--------------------------------|-------------------|--------------------------------------|--------|
|                                                                  | Maharashtra            | Andhra Pradesh | Maharashtra                    | Andhra Pradesh    | Mean (95%CI)                         | p      |
| <b>Large IP expenditure (INR 23000 deflated to 2004 figures)</b> |                        |                |                                |                   |                                      |        |
| <b>All</b>                                                       | 6.7(6.2:7.3)           | 3.4(2.9:3.9)   | 3.1(2.1:4.1)                   | 2.2(1.5:2.8)      | -0.91(-2.1:0.27)                     | 0.1302 |
|                                                                  |                        |                |                                |                   | <b>DID (adjusted for covariates)</b> |        |
|                                                                  |                        |                |                                |                   | -1.8(-3:-0.7)                        | 0.0009 |
| <b>Head of Household</b>                                         |                        |                |                                |                   |                                      |        |
| Male                                                             | 6.8(6.2:7.6)           | 3.5(3.1:4)     | 3.1(2.0:4.1)                   | 2.1(1.5:2.9)      | -0.8(-2.1:-0.4)                      | 0.1928 |
| Female                                                           | 5.0(3.7:6.4)           | 2.8(1.9:3.7)   | 3.9(2:5.8)                     | 2(6.6:3.4)        | -1.8(-4.2:0.50)                      | 0.1222 |
| <b>Social Group</b>                                              |                        |                |                                |                   |                                      |        |
| Scheduled Tribes                                                 | 2.2(1.3:3.1)           | 1.4(0.5:2.2)   | 5.3(3.5:7)                     | 3.5(1.9:5.1)      | -1.7(-4.1:0.61)                      | 0.1478 |
| Scheduled Castes                                                 | 6.1(4.6:7.7)           | 2.1(1.5:2.6)   | 4.3(2.3:6.3)                   | 3(1.9:4.1)        | -1.2(-3.5 :1.01)                     | 0.2785 |
| Other Excluded                                                   | 5.9(4.7:7.0)           | 3.3(2.7:3.8)   | 2.9(1.1:4.6)                   | 2.7(1.7:3.6)      | -2.1(-2.2:1.8)                       | 0.8389 |
| All other Groups                                                 | 8.3(7.5:7.9)           | 5.4(4.4:6.3)   | 2.2( 0.9:3.6)                  | 0.51(-0.7:1.7)    | -1.7(-3.5:0.04)                      | 0.0628 |
| <b>Location</b>                                                  |                        |                |                                |                   |                                      |        |
| Rural                                                            | 1.9(1.5:2.2)           | 0.9(0.79:1.1)  | 1.7(1.1:2.3)                   | 1.3(0.09:1.6)     | -0.45(-1.1:0.25)                     | 0.2098 |
| Urban                                                            | 12.9(11.9:14)          | 9.7(8.9:10.7)  | 4.4(3.0:5.7)                   | 3.9(2.6:5.3)      | -0.7(-2.4: 1.5)                      | 0.6350 |
| <b>Quintile</b>                                                  |                        |                |                                |                   |                                      |        |
| poorest                                                          | 1.8(1.3:2.4)           | 1.1(0.8:1.4)   | 3.7(2.2:5.2)                   | 1.7(0.7:2.7)      | -0.2(-3.8:-0.19)                     | 0.0307 |
| 2nd                                                              | 2.7(1.9:3.5)           | 1.2(0.9:1.5)   | 2.1(0.93:3.3)                  | 2.2(1.4:3.1)      | 0.9(-1.4:1.6)                        | 0.9079 |
| middle                                                           | 6.9(4.9:8.9)           | 4.2(3.1:5.3)   | 1.3(-1:3.6)                    | 0.9(-1.2:1.4)     | -1.2(-3.9:1.4)                       | 0.3596 |
| 4th                                                              | 10.7(8.7:12.6)         | 7.6(5.9: 9.2)  | 1.8(-0.57:4.3)                 | -0.036(-1.9:1.80) | -1.9(-4.9:1.2)                       | 0.2268 |
| richest                                                          | 13.5(12:14.9)          | 9.6(8.1:11.2)  | 0.3(-1.6:2.2)                  | -0.6(-2.8:1.6)    | -0.9(-3.7:2)                         | 0.5601 |

#### Changes in large borrowing for inpatient care

In both states proportions of households incurring large borrowings to meet inpatient expenses increased from 2004 to 2012 (Table 5). However, there was a consistent pattern of smaller increases in AP for the overall population, as well as all subgroups (except the richest asset quintile) with DID's strongly significant for the overall population (adjusted DID=-4, 95% CI: -6.6:-1.4, p= 0.0032), scheduled tribes (DID= -5.5, 95% CIs:-9.3:-1, p= 0.0048), rural households (DID= -4.7, 95% CIs: -7.3 : -2.1, p= 0.0007) and all asset quintiles except the richest (the poorest asset quintile DID= -9.0, 95% CI: -14.0: -4.4, p=0.0002).

**Table 5: Change in the proportion (%) of households large borrowings for in-patient care in Maharashtra and AP between 2004 and 2012**



| Subgroups                                               | Baseline Mean (95% CI) |                    | Change 2004:2012 Mean (95% CI) |                     | DID                                  |        |
|---------------------------------------------------------|------------------------|--------------------|--------------------------------|---------------------|--------------------------------------|--------|
|                                                         | Maharashtra            | Andhra Pradesh     | Maharashtra                    | Andhra Pradesh      | Mean (95%CI)                         | p      |
| <b>Proportion of households having large borrowings</b> |                        |                    |                                |                     |                                      |        |
| <b>All</b>                                              | 7.5(6.7:8.2)           | 3.8(3:4.5)         | 8.9(6.8:11)                    | 5.3(3.4:7.2)        | -3.7(-6.4:-0.908)                    | 0.0100 |
|                                                         |                        |                    |                                |                     | <b>DID (adjusted for covariates)</b> |        |
|                                                         |                        |                    |                                |                     | -4(-6.6:-1.4)                        | 0.0032 |
| <b>Head of Household</b>                                |                        |                    |                                |                     |                                      |        |
| Male                                                    | 7.8(7.0:8.5)           | 3.9(3.1:4.7)       | 9.8(6.6:13)                    | 5.3(3.3:7.3)        | -3.6(-6.6:-0.62)                     | 0.0187 |
| Female                                                  | 5(3:7)                 | 2.9(1.7:4.1)       | 8.(6.6:11.2)                   | 5(2.9:7.23)         | -4.7(-8.3:-1)                        | 0.0137 |
| <b>Social Group</b>                                     |                        |                    |                                |                     |                                      |        |
| Scheduled Tribes                                        | 3.6(2.3:4.9)           | 2.4(0.93:3.9)      | 11(8.9:14)                     | 5.8(2.8:8.8)        | -5.5(-9.3:-1.8)                      | 0.0048 |
| Scheduled Castes                                        | 7.2(5.5:8.8)           | 3(1.7:4.2)         | 9.6(6.6:13)                    | 5.8(3.4:8.3)        | -3.8(-7.5:0.03)                      | 0.0518 |
| Other Excluded                                          | 8.0(6.8:9.2)           | 3.5(2.7:4.4)       | 8(5.8:10.3)                    | 5.3(3.2:7.4)        | -2.8(-5.7:0.19)                      | 0.0661 |
| All other Groups                                        | 8(7.15:8.8)            | 0.052(.040:0.064)  | 8.8(5.9:12)                    | 4.7(2.2:7.4)        | -4.1(-7.9:-.4.0)                     | 0.0302 |
| <b>Location</b>                                         |                        |                    |                                |                     |                                      |        |
| Rural                                                   | 6.5(5.6:7.5)           | 0.03(0.024:0.038)  | 10(8.5:12)                     | 5.8(3.9:7.6)        | -4.7(-7.3:-2.1)                      | 0.0007 |
| Urban                                                   | 8.7(7.3:10)            | 0.056(0.048:0.064) | 7.0(4.5:9.5)                   | 4(1.1:6.9)          | -3.0(-6.7:0.68)                      | 0.1081 |
| <b>Quintile</b>                                         |                        |                    |                                |                     |                                      |        |
| poorest                                                 | 5.2(3.9:6.5)           | 0.025(0.016:0.033) | 12.1(7.8:16)                   | 3.1(1.3:0.049)      | -9(-14:-4.4)                         | 0.0002 |
| 2nd                                                     | 0.064(0.048:0.08)      | 0.027(0.021:0.032) | 0.095(0.070:0.12)              | 0.052(0.034:0.070)  | -0.043(-.073:-.013)                  | 0.0062 |
| middle                                                  | 0.074(0.050:0.098)     | 0.048(0.031:0.065) | 0.10(.073:0.133)               | 0.044(0.013:0.076)  | -0.059(-.100:-.017)                  | 0.0069 |
| 4th                                                     | 0.087(0.063:0.110)     | 0.06(.041:0.078)   | 0.083(0.061:0.104)             | 0.039(0.014:0.064)  | -0.044(-.075:-.012)                  | 0.0076 |
| richest                                                 | 0.10(0.090:0.12)       | 0.064(0.049:0.079) | 0.045(0.0035:0.086)            | 0.049(-.0068:0.105) | 0.0045(-.062:0.071)                  | 0.8937 |

### Hospital utilisation for in-patient care

Overall, hospitalisation rates have increased in both AP and Maharashtra (Table 6) but more so in AP (5.6 per 1000 population vs 2.2), although the DID was not statistically significant. The sub group analysis presented a mixed picture. For both male and female headed households there was a greater increase in hospitalisation in AP, but this reached moderate statistical significance only for female headed households (DID=27.6, 95% CI =1.1:54.1, p-value = 0.0415). There is an increase in hospitalisations among scheduled tribes in Maharashtra and a reduction in AP (DID = -19.8, 95% CI = -37.3: -2.3, p-value = 0.0272) but the opposite trend was seen among 'other excluded' groups with an increase in AP and a reduction in MH (DID = 12.5, 95% CI= 1.2:23.9 p-value = 0.0309). In scheduled castes hospitalisations had increased in both states but more so in AP, while in the 'other' group there was a small increase in MH and a small reduction in AP. In the poorest quintile, the increase in hospitalisation was significantly greater in MH (DID= -14.4, 95%CI=-28:-0.31, p= 0.0451).

**Table 6: Changes in hospitalisation (per 1000 population) in Maharashtra and AP between 2004 and 2012**

| Subgroups                                   | Baseline Mean (95% CI) |                  | Change 2004:2012 Mean (95% CI) |                   | DID                   |        |
|---------------------------------------------|------------------------|------------------|--------------------------------|-------------------|-----------------------|--------|
|                                             | Maharashtra            | Andhra Pradesh   | Maharashtra                    | Andhra Pradesh    | Mean (95%CI)          | p      |
| <b>Hospitalizations per 1000 population</b> |                        |                  |                                |                   |                       |        |
| <b>All</b>                                  | 41.3(37.3:45.2)        | 31.5(27.8:35.3)  | 2.2 (-4.7:9.1)                 | 5.6(-1.1:12.3)    | 3.4( -5.9 :12.7)      | 0.4636 |
|                                             |                        |                  |                                |                   | <b>DID (adjusted)</b> |        |
|                                             |                        |                  |                                |                   | 0.7(-8.6:10.2)        | 0.8685 |
| <b>Head of Household</b>                    |                        |                  |                                |                   |                       |        |
| Male                                        | 41.0(37.1:44.9)        | 31.7 (16.9:34.0) | 1.9( -5.1:8.8)                 | 4.4( -2.4:11.1)   | 2.5( -6.9:11.9)       | 0.5966 |
| Female                                      | 51.6 (30.6:72.5)       | 25.5(27.7:35.7)  | 13.9( -7.53:35.4)              | 41.5 ( 24.6:58.4) | 27.6( 1.1:54.1)       | 0.0415 |
| <b>Social Group</b>                         |                        |                  |                                |                   |                       |        |
| Scheduled Tribes                            | 23.7(14.2 :33.1615)    | 35.5(21.9:49.1)  | 17.1(5.8:28.5)                 | -2.7(-16.95:11.5) | -19.8(-37.3: -2.3)    | 0.0272 |
| Scheduled Castes                            | 42.4(36.3:48.4)        | 29.5(22.6:36.5)  | 3.9(-7.9:15.7)                 | 7.6( -2.6:17.7)   | 3.7( -11.4:18.7)      | 0.6268 |
| Other Excluded                              | 44.2(38.2:50.2)        | 29.9( 25.5:34.3) | -1.9(-11.2 :7.3109)            | 10.6(3.4:17.8)    | 12.5(1.2:23.9)        | 0.0309 |
| All other Groups                            | 42.5(37.1:47.9)        | 34.9(29.0:40.9)  | 0.93(-7.3:9.1)                 | -1.1(-9.4: 7.4)   | -2.0( -13.5 :9.4)     | 0.7235 |
| <b>Location</b>                             |                        |                  |                                |                   |                       |        |
| Rural                                       | 36.6(32.2:41)          | 28.9(26.4:31.5)  | 9.5(3.5:15.4)                  | 8.8(2.2:15.3)     | -0.69( -9.3:7.9)      | 0.8725 |
| Urban                                       | 48.2(43.7:53)          | 38.2(35.5:41.2)  | -7.9(-14.5: -1.3)              | -2.5(-12.1:7.1)   | 5.4(-5.8:16.6)        | 0.3358 |
| <b>Quintile</b>                             |                        |                  |                                |                   |                       |        |
| poorest                                     | 31.4(25.9:36.9)        | 27.5(22.8:32.1)  | 20.7(9:32.8)                   | 6.4( -1.7:14.4)   | -14.4(-28:-0.31)      | 0.0451 |
| 2nd                                         | 36.5(28.3:44.7)        | 27.1(21.9:32.4)  | 8(0.5:15.4)                    | 8.9( -5.6:18.4)   | 0.9( -10 : 12.5)      | 0.8746 |
| middle                                      | 47.8(33.6:62.1)        | 35.3(29.0:41.6)  | -1.5(-17.9:14.8)               | 4.1(-5.6:13.7)    | 5.6( -12.8:24.0)      | 0.5457 |
| 4th                                         | 46.9(39.9:53.9)        | 41.7(32.7:50.8)  | -4.0( -12:3.4)                 | -5.1( -15.7:5.4)  | -0.75( -13.3:11.9)    | 0.9056 |
| richest                                     | 51.0(46:56.1)          | 36.5(25.8:47.2)  | -13.1(-18.9: -7.1)             | 1.5( -19.5:22.6)  | 15.0( -5.8: 3.6)      | 0.1665 |

### LIMITATIONS OF THE STUDY

Difference in difference estimations aimed at assessing the impacts of interventions, assume that both populations demonstrate similar characteristics prior to the start of the intervention, and that 'unobservables' follow a common trend; under such circumstances, any differences in changes observed over time between the 2 populations are attributable to the interventions<sup>39, 40</sup>. Despite AP and Maharashtra having broadly similar socio-economic profiles, there may have been factors resulting in unobserved differential changes between the 2 populations and to which the results of the DID analysis may be at least partially attributable.

A second limitation could arise from the impact of other public health programmes implemented during the period 2004 to 2012. The most significant of these is the National Rural Health Mission launched in 2005, mainly to improve maternal and child health through the revitalization of rural primary care and child and maternal health services. A key assumption of our study is that the impacts of the NRHM in terms of healthcare expenditure for maternal and child health care would have been similar in both states, as this was a nationwide development. Despite the improvements in the public sector maternal and child health services sought by the NRHM, it is widely recognised

1  
2  
3 that the public, including BPL families, continues to pay OOP for private health care. We have  
4 assumed that this behaviour is likely to be similar across the 2 states. Other health initiatives such as  
5 the Navsanjeevani Yojana and HMRI were unlikely to have had an impact on inpatient care or  
6 expenditure. The 108 scheme had the potential, in AP, to influence hospitalisation rates, by helping  
7 more households to visit hospitals when seriously ill. But the effect is likely to be small as the  
8 majority of even serious illnesses do not result in a 108 call for transport. The implementation of the  
9 RSBY and the scheme to make private hospital beds available for the poor in MH may have diluted  
10 the DID, although both schemes are known to have been only partially implemented.  
11

12  
13 Lastly, the 2004 NSSO survey which served as our baseline, was carried out between January and  
14 June 2004. Our end-line 2012 survey was carried out over a period of 3 months from June to  
15 September. The morbidity and mortality patterns recorded in different time periods may vary, and  
16 could have influenced the data.  
17

## 18 DISCUSSION

19  
20 We found that average expenditure, large expenditures and large borrowings on inpatient care had  
21 increased in both MH and AP, but the increase was consistently smaller in AP across these 3  
22 outcome measures, and may be suggestive of Aarogyasri having a somewhat larger effect than RSBY.  
23 Similar increases in institutional deliveries across the 2 states, and low levels of utilisation of RSBY  
24 and Jeevandayee schemes in MH may further strengthen this explanation.  
25

26 The increase in average OOPE on inpatient care in AP and MH reflects a trend observed  
27 nationwide<sup>16, 41</sup>. The Aarogyasri scheme may have contributed to the more favourable trajectory in  
28 AP both directly and indirectly, in that the scheme may have contributed to a reduction in the prices  
29 of interventions and an increase in competition among health care providers. The evaluation of the  
30 Yeshasvini scheme also found a significant reduction in the price of surgical interventions<sup>10</sup>. Our  
31 findings may suggest that the positive effects of Aarogyasri detected by other studies<sup>15,16</sup> at an early  
32 stage of the roll out of the scheme have been sustained. Automatic enrolment into the scheme, near  
33 universality of coverage and no requirement for enrollee contributions may have contributed to the  
34 significant DIDs in male headed households, scheduled castes, rural households and the poorest and  
35 middle asset quintiles. But these benefits were not demonstrated in some of the most vulnerable  
36 groups - female headed households and scheduled tribes. This is consistent with the findings of  
37 other studies<sup>5,16</sup> which reported that the slightly less vulnerable may benefit more from such  
38 schemes, with non-financial barriers undermining access to services for the most vulnerable socio-  
39 economic groups. The case summaries below illustrate the obstacles they face. A similar observation  
40 was reported by the evaluation of the Mexican Seguro Popular health scheme which showed that a  
41 third of the treatment-cluster households who were automatically affiliated were unaware of this  
42 fact<sup>42</sup>.  
43  
44

45 The likely explanation of an Aarogyasri effect may be strengthened by the trend for large borrowings  
46 which has also increased over time in both states but less so in AP across all groups of analysis  
47 except the richest asset quintile. A multi-country analysis of household catastrophic health  
48 expenditure highlighted that increasing the availability of health services is critical to improving  
49 health in poor countries, but it could also raise the proportion of households facing catastrophic  
50 expenditure unless financial risk protection policies are given a high priority<sup>43</sup>. Borrowing of  
51 comparatively small amounts is less impactful and may be a result of improved access to financial  
52 markets and also supports consumption smoothing. During recent decades, AP has in particular  
53 witnessed a significant rise in microfinance institutions and debt due to high levels of interest levied  
54 by the more recent entrants to this market<sup>44, 45</sup>. Nevertheless our results suggest that increases in  
55 large borrowings associated with inpatient health care were smaller in AP. Strongly significant DIDs  
56 in scheduled tribes, rural households and the poorest and second asset quintiles and moderately  
57  
58  
59  
60

1  
2  
3 significant DIDs in female headed households, scheduled castes, and other excluded social groups  
4 may also point to Aarogyasri beginning to offer greater equity of access when families are faced with  
5 serious illness.  
6

7 In terms of large OOPE, a significant DID was found only for the total households, but the direction  
8 of all DIDs except for the second asset quintile was the same as for average expenditure on inpatient  
9 care and large borrowings, i.e., in favour of AP. It is perfectly possible that the non-significant  
10 differences for the majority of sub groups are due at least in part to the RSBY, the availability of  
11 private sector hospital beds for the poor and the Jeevandayee schemes reducing large OOPE in MH,  
12 and that without these schemes the expenditure would have been greater. In AP, 70 percent of  
13 survey households reported that they were covered by the Aarogyasri scheme, but only 25 percent  
14 of these 'covered' households were aware that the benefit package was limited. It is also possible  
15 therefore that in AP some families seek hospital care assuming that the Aarogyasri scheme provides  
16 comprehensive cover, but are faced with large expenditures when their treatments fall outside the  
17 limits.  
18

19  
20 The mixed picture in relation to the increasing rate of hospitalisations in both states may suggest  
21 that the Aarogyasri and in particular, the RSBY scheme which covers common hospital procedures  
22 are addressing a large hitherto unmet need for inpatient care. The 108 scheme in AP may be an  
23 additional albeit smaller contributor. It may also be explained by a supplier-induced demand. An  
24 assessment of health provider behaviour and governance is an important strand of the evaluation of  
25 health financing schemes<sup>46</sup>, but was outside the remit of our study. We would however strongly  
26 recommend an impact evaluation focusing on health care supply to complement our evidence.  
27 The reduction in hospitalisations among scheduled tribes and the poorest asset quintile in AP are of  
28 concern and suggest that if the poor are to secure the benefits appropriated by the near poor or  
29 more often by the rich<sup>47</sup>, the provision of more comprehensive health schemes is essential, which  
30 combines the tertiary care focus of Aarogyasri and the secondary care benefits of RSBY with  
31 attention paid to minimise barriers such as the widespread influence of illiteracy and lack of  
32 awareness, which limit access to even schemes such as Aarogyasri that are apparently highly  
33 inclusive and non-discriminatory, as well as distance to facilities. Our case summaries illustrate this.  
34 Furthermore, health financing reforms such as the Jamkesmas<sup>48</sup> in Indonesia and the Seguro Popular  
35 in Mexico<sup>42</sup>, both countries similar to India in terms of population and growing economies, include  
36 outpatient and inpatient care, and curative as well as preventive services, suggesting that a more  
37 comprehensive service is possible to implement and worthy of consideration.  
38  
39

40 In summary, health innovations in AP had a greater beneficial effect on hospital inpatient care-  
41 related expenditures than innovations in MH. The Aarogyasri scheme is likely to have contributed to  
42 these impacts in AP, at least in part. But in both states, OOPE increased over time. Hospitalisations  
43 also increased, and while it is generally assumed that in developing countries this is likely to address  
44 genuine need, its impact on health status is not known.  
45

#### 46 **IMPLICATIONS FOR POLICY AND PRACTICE**

47  
48  
49 Despite these uncertainties, Aarogyasri is perceived, with some justification across India as a  
50 successful scheme, and is being rapidly replicated across the states. Since July 2012, MH too has  
51 joined the list of states offering an Aarogyasri-like scheme, the Rajiv Gandhi Jeevandayee Arogya  
52 Yojana<sup>49</sup>. This study has highlighted that such schemes may result in some positive outcomes.  
53 Although the study was not designed to elicit the specific features of the scheme to which any  
54 comparatively greater benefits may be attributable, and which deserve to be replicated in other  
55 states, evidence from systematic reviews<sup>3</sup> points to the need for schemes to be more  
56 'comprehensively' designed to maximise their positive impact. Aarogyasri's design in terms of its  
57 aims to address both financial and non-financial barriers - being fully state funded, the systematic  
58  
59  
60

1  
2  
3 administrative implementation of Aarogyasri across the state so that it is now almost universal,  
4 automatic enrolment, allowing access to the scheme via a ration card which most poor families own,  
5 the wide spectrum of treatments offered, the large number of health care providers empanelled - is  
6 perhaps responsible as a 'comprehensive' package, for the greater impact.  
7

8  
9 But the study also suggests that equity of access to health care and the reduction of the overall  
10 burden of OOPE especially in the most vulnerable sections of the population<sup>50</sup> are likely to require  
11 additional interventions that address gaps in the availability of care and provide patients appropriate  
12 pathways that support their journey from a strong and comprehensive primary care service where  
13 they may be informed of their entitlements and investigated for their initial symptoms to  
14 appropriate hospitals for the treatment of serious illness. Besides, inpatient care is only consumed  
15 by a small proportion of households in a year<sup>51</sup>, and this is especially true of tertiary care, while  
16 many more will seek outpatient services and referral to inpatient care, should this be required.  
17 Others have strongly recommended the strengthening of the primary care base as an essential  
18 means to universal health coverage and this study confirms their view<sup>41</sup>. Key implications for AP are  
19 to explore how best the most advantageous features of Aarogyasri can be extended to include both  
20 secondary and primary care, while those for MH may be to build on and unify its menu of currently  
21 available schemes to create an evidence-based comprehensive health delivery system. These  
22 conclusions may be applicable to other states with similar health financing schemes.  
23

24  
25 The design of health financing systems as well as their evaluations is complex and challenging, as the  
26 mountain of available evidence suggests<sup>41, 42, 51, 52</sup>. Even the ground-breaking Seguro Popular health  
27 insurance programme of Mexico which used a cluster-randomised trial design with strong  
28 government support demonstrated some but not all anticipated outcomes, contrary to  
29 expectations<sup>42</sup>, and a key recommendation was that continued assessment of the programme was  
30 needed. Furthermore, differences in data and methodology may result in even very well designed  
31 evaluations of the same programme producing contrasting findings<sup>52</sup>. Our evaluation is the first to  
32 use a quasi-experimental methodology - the best possible in the hierarchy of evaluation  
33 methodologies, when a randomised control trial is not achievable - to evaluate the health financing  
34 reforms in 2 large states of India. Despite that, the study has limitations which we have  
35 acknowledged. For example, the evaluation was not designed to assess provider behaviours. Many  
36 other pertinent questions such as the impact of the schemes on the overall economy of health care  
37 cannot be answered by a single evaluation. But these are recognised problems which can only be  
38 addressed through continuous assessments, as other evaluations have shown. Our study has  
39 nevertheless produced sufficient insights to enable policy leaders to improve programme  
40 effectiveness and, importantly, to undertake further assessment. Our household survey data provide  
41 a valuable baseline for future monitoring in both states.  
42  
43

44 This study needs to be followed up with further and repeated evaluations as AP's and MH's schemes  
45 evolve; to assess the impacts of re-design and to help health policy leaders achieve their aspiration  
46 of universal access to good quality health care.  
47  
48  
49  
50  
51

### Three faces of the Aarogyasri Scheme

#### The beneficiary:

Lakshamma, a 65 year old widow, is from a tribal background. She is an unskilled labourer, supporting a family of 5, with a monthly income of INR 4000 (USD 74). She was referred to a municipal hospital with chest pain and underwent heart surgery. The hospital which is a part of the

1  
2  
3 Aarogyasri network provided free care and her total out of pocket expenses amounted to INR 850  
4 (16 USD) for initial transport. In addition to the surgery, she received free food, money for transport  
5 home and follow up medicines. She is very satisfied with the service she received.  
6

7 **The excluded:**

8  
9 Ramulamma, a mother has a BPL card, but her daughter Lakshmi does not, as she was abandoned by  
10 her husband who is a government employee and entitled to free health care. The mother was  
11 unable to secure free care using her BPL card for her seriously ill daughter who paid out-of-pocket at  
12 a private facility where she was offered a hysterectomy for the relief of her gynaecological  
13 symptoms. Lakshmi's health care costs were met by the family selling a number of household assets  
14 and Lakshmi's daughter discontinuing her education to take up paid work. Lakshmi is severely  
15 depressed and does not speak to anyone.  
16

17 **The uninformed:**

18  
19 Krishnamma 43 years old, had severe stomach pains one night. Although the family had a BPL card,  
20 Ramulu her husband and Srinivas her son rushed her to a private hospital nearby, which was not  
21 part of the Aarogyasri network. They were unaware of how to access the Aarogyasri scheme  
22 hospitals which were further away from home, and the local primary health services being  
23 inadequate, Krishnamma had not had her initial symptoms investigated. The treatment was funded  
24 through a loan from a private moneylender. On discharge, she has not attended follow up, as the  
25 family cannot afford transport or medicines.  
26



1  
2  
3 **All authors had full access to all the data (including statistical reports and tables) and can take**  
4 **responsibility for the integrity of the data and the accuracy of the data analysis**  
5

6 **M Rao affirms that the manuscript is an honest, accurate and transparent account of the study**  
7 **being reported and no important aspects of the study have been omitted.**  
8

9 **FUNDED BY :** Wellcome Trust, IDRC, Rockefeller Foundation, DFID, World Bank.  
10

11 **ROLE OF THE FUNDING SOURCES:** The external funding sources had no role in study design, data  
12 collection, analysis, interpretation or reporting, or in submission decision.  
13

14 **ROLE OF THE STUDY SPONSOR:** The study was carried out in response to the formal invitation of the  
15 Government of Andhra Pradesh which supported our applications for funding (by providing formal  
16 letters of support). The Government did not provide any funding, and had no role in study design,  
17 data collection, analysis, interpretation or reporting, or in submission decision.  
18

19 **STATEMENT OF INDEPENDENCE OF RESEARCHERS:** The authors can confirm that they worked  
20 independently from the Funders and Government of Andhra Pradesh who had no role in any aspect  
21 of the research  
22

#### 23 **CONFLICT OF INTEREST**

24  
25 All authors have completed the ICMJE forms for disclosure of potential conflicts of interest (available  
26 on request from the corresponding author) and declare that 1) MR, AK, PS, AS, and SB have support  
27 from the Rockefeller Foundation, Wellcome Trust, International Development Research Centre,  
28 Canada and Department for International Development, UK, 2) the authors have no relationships  
29 with the funders that might have an interest in the submitted work in the previous 3 years, 3) the  
30 authors' spouses, partners, or children have no financial relationships that may be relevant to the  
31 submitted work, and 4) the authors have no non-financial interests that may be relevant to the  
32 submitted work.  
33

34 **ETHICAL APPROVAL:** given by the research ethics committee of the Administrative Staff College of  
35 India, Hyderabad, which hosted the study. Household survey questionnaires include signed consent  
36 by the head of the household or another adult representative of the household.  
37

38  
39 **DATA SHARING STATEMENT:** The 2004 National Sample Survey Organisation of India household  
40 survey questionnaire and data are available to the public. The 2012 household survey questionnaire,  
41 and the full anonymised household survey dataset will be available with open access as soon as the  
42 data analyses and submissions for publication are completed.  
43

44 **COPYRIGHT STATEMENT:** Mala Rao, the Corresponding Author has the right to grant on behalf of all  
45 authors and does grant on behalf of all authors, an exclusive licence on a worldwide basis to the BMJ  
46 Publishing Group Ltd to permit this article (if accepted) to be published in BMJ editions and any  
47 other BMJ PGL products and sublicences such use and exploit all subsidiary rights, as set out in your  
48 licence.  
49

50 **STROBE CHECKLIST FOR CROSS SECTIONAL STUDIES:** We can confirm that all 22 items in the  
51 STROBE checklist are included in the paper.  
52  
53  
54  
55

**CONTRIBUTORS' STATEMENT**

MR conceived and designed the study, applied for funding, and was responsible for the supervision and management of the study as well as the dissemination of its results. She is also the guarantor of the study. SB shared responsibility for the conception of the study, applications for funding, study design and data collation and analysis, contributed to the questionnaire design and commented on drafts of the report. PS contributed to the conception of the study and study design, led the questionnaire design and survey implementation, including training of survey staff, monitoring survey progress and data collation and verification, commented on drafts of the report and helped prepare the references. AK undertook the data collation, verification and analysis, assisted with the survey and questionnaire design and survey implementation and prepared the tables for the report. AS led the literature review, assisted with the study and questionnaire design, survey implementation and preparation and analysis of baseline data, and commented on drafts of the report. MK helped with the data analysis. AW devised the methodology for the estimation of the programme impacts, advised during the data-collection and data-preparation stages, wrote and implemented the computer code for the model estimation, helped to oversee the production of the results, and contributed text to the report. GN provided technical advice on accounting for the complex survey structure in the analysis, developed a STATA equation, helped to compute an asset index, advised on the output tables, verified the analysis and commented on drafts of the report. AR helped develop a conceptual framework for the evaluation, advised on funding proposals, the study design, analytical methodology and presentation of results and contributed text to the report. MR wrote the first draft of the paper and its redrafts in accordance with the comments of all other authors and reviewers.



## References

- <sup>1</sup> Resolution WHA58.33. Sustainable health financing, universal coverage and social health insurance. In: *Fifty-eighth World Health Assembly, Geneva, 16–25 May 2005*. Geneva, World Health Organization, 2005 ([http://apps.who.int/gb/ebwha/pdf\\_files/WHA58/WHA58\\_33-en.pdf](http://apps.who.int/gb/ebwha/pdf_files/WHA58/WHA58_33-en.pdf), accessed 26<sup>th</sup> March 2013).
- <sup>2</sup> World Health Organization. Health Systems Financing Path to Universal Coverage. Geneva: World Health Organization. 2010. Available from: World Health Organization Library Information Services.
- <sup>3</sup> Acharya A, Vellakkal S, Taylor F, Masset E, Satija A, Burke M, Ebrahim S. Impact of national health insurance for the poor and the informal sector in low and middle income countries : a systematic review. London: EPPICentre, Social Science Research Unit, Institute of Education, University of London. 2012. Available from: <http://www.dfid.gov.uk/r4d/PDF/Outputs/SystematicReviews/Health-insurance-2012Acharya-report.pdf>
- <sup>4</sup> Giedion, U., B. Y. Diaz . A Review of the evidence. In: *The Impact of Health Insurance in Low-and Middle-Income Countries*. M. L. Escobar, C. Griffin and R. P. Shaw (ed). Washington DC, Brookings Inst Press 2011.
- <sup>5</sup> Giedion, U, Alfonso, E, Diaz. *The impact of universal coverage schemes in the developing world : a review of the existing evidence*. Universal Health Coverage (UNICO) studies series ; no. 25. Washington D.C. : The World Bank. 2013
- <sup>6</sup> National Commission on Macroeconomics and Health. Report of the National Commission on Macroeconomics and Health. New Delhi: Ministry of Health and Family Welfare of India. 2005. Available from: Ministry of Health and Family Welfare
- <sup>7</sup> Eleventh Five Year Plan (2007–2012). Vol 2: Social Sector. Government of India Planning Commission. October, 2008. [http://planningcommission.nic.in/plans/planrel/fiveyr/11th/11\\_v2/11th\\_vol2.pdf](http://planningcommission.nic.in/plans/planrel/fiveyr/11th/11_v2/11th_vol2.pdf), (accessed Mar 26 2013).
- <sup>8</sup> Faster, Sustainable and More Inclusive Growth. An Approach to the Twelfth Five Year Plan (2012-17). Government of India Planning Commission. October, 2011. [http://planningcommission.nic.in/plans/planrel/12appdrft/approach\\_12plan.pdf](http://planningcommission.nic.in/plans/planrel/12appdrft/approach_12plan.pdf), accessed 26th March 2013
- <sup>9</sup> La Forgia G, Nagpal S. Government-Sponsored Health Insurance in India. *Are You Covered?* World Bank Washington DC 2012. doi:10.1596/978-0-8213-9618-6.
- <sup>10</sup> Agarwal A. "Impact evaluation of India's 'Yeshasvini' community based health insurance programme. *Health Economics* 2010; 19: 5-35
- <sup>11</sup> See The scheme website at <https://www.aarogyasri.org/ASRI/index.jsp>, accessed 26<sup>th</sup> March 2013.
- <sup>12</sup> Scheme status. <http://www.rsby.gov.in/statewise.aspx?state=35> (accessed Apr 30 2013)
- <sup>13</sup> Mahal A. Learning and getting better: Rigorous evaluation of health policy in India. *National Medical Journal of India*. 2011. 325-27.
- <sup>14</sup> Aarogyasri Health Care Trust Annual Report 2011-2012. [https://www.aarogyasri.org/ASRI/EXT\\_IMAGES/documents/Annual\\_Report\\_201011.pdf](https://www.aarogyasri.org/ASRI/EXT_IMAGES/documents/Annual_Report_201011.pdf) (accessed Mar 26 2013)
- <sup>15</sup> Rao M, Ramachandra S, Bandyopadhyay S, et al. Addressing healthcare needs of people living below the poverty line: a rapid assessment of the Andhra Pradesh Health Insurance Scheme. *National Medical Journal of India*. 2011. 24(6):335-41.
- <sup>16</sup> Fan V, Karan A, Mahal A. "State Health Insurance and Out-of-Pocket Health Expenditures in Andhra Pradesh, India." CGD Working Paper 298. Washington, D.C.: Center for Global Development. 2012 <http://www.cgdev.org/content/publications/detail/1426275> (accessed Mar 15 2013)
- <sup>17</sup> Palacios R, Das J, Sun C eds. India's health insurance scheme for the poor: Evidence from the early experience of Rashtriya Swasthya Bima Yojana. New Delhi: Center for Policy Research; 2011
- <sup>18</sup> Rashtriya Swasthya Bima Yojana overview and scheme details. <http://www.rsby.gov.in> (accessed Apr 30 2013)
- <sup>19</sup> Rathi P. <http://www.priorities2012.com/documents/3d-4-patreek.pdf>
- <sup>20</sup> NRHM Mission Document. [http://www.nird.org.in/brgf/doc/Rural%20HealthMission\\_Document.pdf](http://www.nird.org.in/brgf/doc/Rural%20HealthMission_Document.pdf) (accessed Apr 30 2013)
- <sup>21</sup> State HMIS data analysis, April'10-March'11 Andhra Pradesh, prepared by NHSRC. [http://cfw.ap.nic.in/nrhm/pdf/AP\\_Analysis\\_Apr2010-Mar2011.pdf](http://cfw.ap.nic.in/nrhm/pdf/AP_Analysis_Apr2010-Mar2011.pdf) (accessed May 2 2013)
- <sup>22</sup> NRHM achievements in Maharashtra. <http://www.nrhm.maharashtra.gov.in/achievements.htm> (accessed May 2 2013)
- <sup>23</sup> Health information helpline. <http://www.hmri.in/oursolutions-healthinformation.html> (accessed Apr 30 2013)

- 1  
2  
3  
4  
5  
6  
7  
8  
9  
10  
11  
12  
13  
14  
15  
16  
17  
18  
19  
20  
21  
22  
23  
24  
25  
26  
27  
28  
29  
30  
31  
32  
33  
34  
35  
36  
37  
38  
39  
40  
41  
42  
43  
44  
45  
46  
47  
48  
49  
50  
51  
52  
53  
54  
55  
56  
57  
58  
59  
60
- 
- <sup>24</sup> About the project/scheme. <http://www.maha-arogy.gov.in/projectandschemes/Jeevandaiaarogy/default.htm> (accessed Apr 30 2013)
- <sup>25</sup> Jeevandayee scheme performance: Information received from Rajiv Gandhi Jeevandayee Arogya Yojana Society Govt of Maharashtra on May 17 2013
- <sup>26</sup> Projects and schemes. <http://maha-arogy.gov.in/projectandschemes/itdpnavsanjivani%5Cdefault.htm> (accessed Apr 30 2013)
- <sup>27</sup> Mallepeddi R , Pernefeldt H, Bergkvist S . Andhra Pradesh health sector reform, A narrative case study, Technical paper No.7 for The Rockefeller Foundation–Sponsored Initiative on the Role of the Private Sector in Health Systems in Developing Countries. 2009 ; pp 42-48
- <sup>28</sup> EMRI. <http://www.emri.in/states.html> (accessed Apr 30 2013)
- <sup>29</sup> Developing and evaluating complex interventions: new guidance. Medical Research Council. London 2008.
- <sup>30</sup> Cesar G V, Jean-Pierre H, Jennifer B. Evidence-Based Public Health: Moving Beyond Randomized Trials. *Am J Public Health*. 2004 March; 94(3): 400–405.
- <sup>31</sup> Presentation on Annual Plan 2012-13 and Five Year Plan 2012-17. [http://planningcommission.nic.in/plans/stateplan/Presentations12\\_13/maharashtra1213.pdf](http://planningcommission.nic.in/plans/stateplan/Presentations12_13/maharashtra1213.pdf) (accessed on mar 25 2013)
- <sup>32</sup> National Sample Survey Organization. Morbidity, Healthcare and condition of the Aged. New Delhi: Ministry of Statistics and Programme Implementation. 2004.
- <sup>33</sup> National Sample Survey Organization. Household Consumer Expenditure 66<sup>th</sup> round . New Delhi: Ministry of Statistics and Programme Implementation; 2009-10
- <sup>34</sup> National Sample Survey Organization. Household Consumer Expenditure in India. New Delhi: Ministry of Statistics and Programme Implementation; 2005.
- <sup>35</sup> Booyesen F, Van der Berg S & Burger R. Using an Asset Index to Assess Trends in Poverty in Seven Sub-Saharan African Countries. *World Development*. 2008; 36(6): 1113–1130
- <sup>36</sup> Vyas S. & Kumarnayake L. Constructing socio-economic status indices: How to use principal components analysis. *Health Policy and planning*. 2006; 459-468
- <sup>37</sup> O'Donnell O, Van Doorslaer E, Wagstaff A & Lindelow M, 2008. Analyzing Health Equity Using Household Survey Data: A Guide to Techniques and Their Implementation. Washington DC: World Bank Institute. Chapter 6, Measurement of Living Standards. <http://siteresources.worldbank.org/INTPAH/Resources/Publications/459843-1195594469249/HealthEquityFINAL.pdf> (accessed May 9 2013)
- <sup>38</sup> Ministry of Finance. Economic Survey 2011-12. New Delhi: Government of India. 2012. Available from: <http://indiabudget.nic.in/>
- <sup>39</sup> Poverty Reduction and Social Development Department. A User's Guide to Poverty and Social Impact Analysis. Washington: World Bank;2003
- <sup>40</sup> Gertler P, Martinez S, Premand P, Rawlings L, Vermeersch C. Impact Evaluation in Practice. Washington: World Bank; 2011.
- <sup>41</sup> Selvaraj S, Karan A. Why Publicly-Financed Health Insurance Schemes Are Ineffective in Providing Financial Risk Protection. *Economic and Political Weekly* 2012 March 17; XLVII(11):60-68
- <sup>42</sup> King G, Gakidou E, Imai K, Lakin J, Moore RT, Nall C. Public policy for the poor? A randomised assessment of the Mexican universal health programme. *Lancet*. 2009 Apr 8; DOI:10.1016/S0140-6736(09)60239-7.
- <sup>43</sup> Xu K, Evans DB, Kawabata K, Zeramdini R, Klavus J, Murray CJ. Household catastrophic health expenditure: a multicountry analysis. *Lancet*. 2003 Jul 12;362(9378):111-7.
- <sup>44</sup> Naga Sridhar G. Microfinance institutions: Moving beyond AP crisis. *The Business Line [Newspaper Online]*. 2012 Dec 29. Available from: <http://www.thehindubusinessline.com/companies/microfinance-institutions-moving-beyond-ap-crisis/article4253239.ece>
- <sup>45</sup> Naga Sridhar G. Life after microfinance in AP. *The Business Line [Newspaper Online]*. 2013 Jan 4. Available from: <http://www.thehindubusinessline.com/opinion/life-after-microfinance-in-ap/article4273183.ece>
- <sup>46</sup> Prasad N P, Raghavendra P. Healthcare models in the era of medical neoliberalism. A study of Aarogyasri in Andhra Pradesh. *Economic and Political Weekly* 2012 Oct 27;XLVII(43):118-126
- <sup>47</sup> Health Systems 20-20. An Evaluation of the Effects of the National Health Insurance Scheme in Ghana. Bethesda: Health Systems 20-20. 2009.
- <sup>48</sup> <http://www.jointlearningnetwork.org/programs/compare/benefits/142%2C16>
- <sup>49</sup> Rajiv Jeevandayi scheme details. <http://www.jeevandayee.gov.in/RGJAY/Servlet?requestType=CommonRH&actionVal=RightFrame&page=>

1  
2  
3  
4  
5  
6  
7  
8  
9  
10  
11  
12  
13  
14  
15  
16  
17  
18  
19  
20  
21  
22  
23  
24  
25  
26  
27  
28  
29  
30  
31  
32  
33  
34  
35  
36  
37  
38  
39  
40  
41  
42  
43  
44  
45  
46  
47  
48  
49  
50  
51  
52  
53  
54  
55  
56  
57  
58  
59  
60

---

undefined%3E%3E%3Cb%3ERGJAY%3C/b%3E&pageName=RGJAY&mainMenu=About&subMenu=RGJAY  
(accessed on Apr 30 2013)

<sup>50</sup> Tangcharoensathien V, Swasdiworn W, Jongudomsuk P et al . Universal Coverage Scheme in Thailand: Equity Outcomes and Future Agendas to Meet Challenges. Geneva: World Health Organization. 2010.

<sup>51</sup> Dilip TR. On Publicly-Financed Health Insurance Schemes. Is the analysis premature? Economic and Political Weekly. 2012 May 5; XLVII(1)8:79-80.

<sup>52</sup> Vallakal S, Ebrahim S. Publicly-Financed Health Insurance Schemes. Concerns about Impact Assessment. Economic and Political Weekly. 2013 Jan 5; XLVIII(1);24-27.

For peer review only

Report No. 507 (60/25.0/1)

1  
2  
3  
4  
5  
6  
7  
8  
9  
10  
11  
12  
13  
14  
15  
16  
17  
18  
19  
20  
21  
22  
23  
24  
25  
26  
27  
28  
29  
30  
31  
32  
33  
34  
35  
36  
37  
38  
39  
40  
41  
42  
43  
44  
45  
46  
47  
48  
49  
50  
51  
52  
53  
54  
55  
56  
57  
58  
59  
60

# Morbidity, Health Care and the Condition of the Aged

**NSS 60<sup>th</sup> round  
(January - June 2004)**

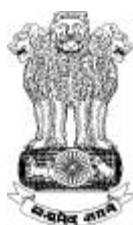

**National Sample Survey Organisation  
Ministry of Statistics and Programme Implementation  
Government of India**

**March 2006**

## Preface

The National Sample Survey Organisation (NSSO) has been collecting information on various facets of the Indian economy through nationwide sample surveys to assist in socio-economic planning and policy-making. The National Sample Survey (NSS) made its first attempt to collect information on morbidity in the 7<sup>th</sup> round (October 1953 - March 1954). This maiden attempt and the subsequent three surveys on the subject from the NSS 11<sup>th</sup> to 13<sup>th</sup> rounds (1956-58) were exploratory in nature and aimed to evolve an appropriate data collection method for studying morbidity profile in India. However, a full-scale survey on morbidity was conducted for the first time during the NSS 28<sup>th</sup> round (October 1973 - June 1974). Since then, the NSSO had not undertaken any separate survey on morbidity and the collection of data on morbidity became a part of the decennial surveys on social consumption carried out in the NSS 35<sup>th</sup> round (July 1980 - June 1981), 42<sup>nd</sup> round (July 1986 - June 1987) and 52<sup>nd</sup> round (July 1995 - June 1996).

A survey on 'Morbidity and Health care' was undertaken by the NSSO during the NSS 60<sup>th</sup> round (January - June 2004) at the request of Ministry of Health and Family Welfare. This subject was taken up along with the subjects of household consumer expenditure and employment-unemployment. The present report is based on the enquiry on 'Morbidity and Health Care' conducted during the NSS 60<sup>th</sup> round. The enquiry covered the curative aspects of the general health care system in India, utilization of health care services provided by the public and private sector and the expenditure incurred by the households for availing these services. In addition, information on the condition and problems of the aged persons was also collected.

The report consists of five chapters and three appendices. Chapter One deals with the introduction and Chapter Two with concepts and definitions that have been used in the survey. Chapters Three, Four and Five discuss the summary results of the survey and their comparison with the results of the previous surveys. While Chapter Three discusses the survey estimates relating to Morbidity and Hospitalisation, Chapter Four deals with estimates on Immunisation and Maternal Health Care. In Chapter Five, the survey results on Conditions and Health Care of the Aged have been discussed.

The Survey Design and Research Division of NSSO was responsible for development of survey methodology as well as drafting of the report. The fieldwork for the survey was handled by the Field Operations Division of NSSO. While the data processing and tabulation work was handled by the Data Processing Division of NSSO, the Coordination and Publication Division of NSSO coordinated various activities pertaining to the survey.

I am thankful to the Chairman and the Members of the Working Group for the NSS 60<sup>th</sup> round as well as to the Chairman and the Members of the Governing Council of NSSO for their overall guidance at various stages of survey work. The report, I hope, will be useful to the planners and policy makers.

Comments and suggestions from readers will be most welcome.

New Delhi  
March 2006

Dr. K.V. Rao  
Director General and Chief Executive Officer  
National Sample Survey Organisation  
Ministry of Statistics and Programme Implementation

## Highlights

|                                                                                                                  | Rural | Urban |
|------------------------------------------------------------------------------------------------------------------|-------|-------|
| <b>A. Morbidity and health care</b>                                                                              |       |       |
| <b>Proportion of Ailing Persons by Residence Status &amp; Sex</b>                                                |       |       |
| Number (per 1000) of persons reporting ailment (PAP) during a period of 15 days                                  |       |       |
| Male                                                                                                             | 83    | 91    |
| Female                                                                                                           | 93    | 108   |
| Person                                                                                                           | 88    | 99    |
| <b>Level of Morbidity in broad age-groups</b>                                                                    |       |       |
| PAP during a period of 15 days in broad age-groups                                                               |       |       |
| 0-14                                                                                                             | 72    | 79    |
| 15-29                                                                                                            | 49    | 50    |
| 30-44                                                                                                            | 78    | 79    |
| 45-59                                                                                                            | 119   | 149   |
| 60 or more                                                                                                       | 283   | 368   |
| <b>Inter-state Variation in Level of Morbidity</b>                                                               |       |       |
| States with relatively high PAP during a period of 15 days                                                       |       |       |
| Kerala                                                                                                           | 255   | 240   |
| Punjab                                                                                                           | 136   | 107   |
| West Bengal                                                                                                      | 114   | 157   |
| Maharashtra                                                                                                      | 93    | 118   |
| States with relatively low PAP during a period of 15 days                                                        |       |       |
| Jharkhand                                                                                                        | 33    | 50    |
| Bihar                                                                                                            | 53    | 63    |
| Uttaranchal                                                                                                      | 52    | 65    |
| Rajasthan                                                                                                        | 57    | 72    |
| <b>Commencement of Ailment</b>                                                                                   |       |       |
| Number (per 1000) of persons reporting commencement of any ailment (PPC) during last 15 days in broad age-groups |       |       |
| 0-14                                                                                                             | 54    | 59    |
| 15-29                                                                                                            | 29    | 32    |
| 30-44                                                                                                            | 37    | 38    |
| 45-59                                                                                                            | 46    | 40    |
| 60 or more                                                                                                       | 68    | 55    |
| all ages                                                                                                         | 45    | 44    |
| <b>Treatment of Ailments</b>                                                                                     |       |       |
| Percentage of spells of ailments treated during 15 days                                                          |       |       |
| Male                                                                                                             | 82    | 90    |
| Female                                                                                                           | 82    | 89    |
| Person                                                                                                           | 82    | 89    |
| <b>Reason for No Treatment</b>                                                                                   |       |       |
| Percentage distribution of untreated spells of ailments by reason for no treatment                               |       |       |
| No medical facility                                                                                              | 12    | 1     |
| Lack of faith                                                                                                    | 3     | 2     |
| Long waiting                                                                                                     | 1     | 2     |
| Financial problem                                                                                                | 28    | 20    |
| Ailment not considered serious                                                                                   | 32    | 50    |
| Others                                                                                                           | 24    | 25    |
| Total                                                                                                            | 100   | 100   |

Continued

## Highlights

|                                                                                                               | Rural | Urban |
|---------------------------------------------------------------------------------------------------------------|-------|-------|
| <b>Sources of Non-hospitalised Treatment</b>                                                                  |       |       |
| Percentage distribution of non-hospitalised treatments by source of treatment                                 |       |       |
| Govt. sources                                                                                                 | 22    | 19    |
| Private sources                                                                                               | 78    | 81    |
| Total                                                                                                         | 100   | 100   |
| <b>Hospitalised Treatment</b>                                                                                 |       |       |
| Number (per 1000) of persons hospitalised any time during a period of 365 days                                |       |       |
| Male                                                                                                          | 23    | 31    |
| Female                                                                                                        | 22    | 31    |
| Person                                                                                                        | 23    | 31    |
| <b>Level of Hospitalisation in broad age-groups</b>                                                           |       |       |
| Number (per 1000) of persons hospitalised any time during a period of 365 days in broad age-groups            |       |       |
| 0-14                                                                                                          | 12    | 20    |
| 15-29                                                                                                         | 19    | 21    |
| 30-44                                                                                                         | 25    | 29    |
| 45-59                                                                                                         | 39    | 48    |
| 60 or more                                                                                                    | 56    | 91    |
| Percentage distribution of hospitalised treatments by type of hospital                                        |       |       |
| Govt. hospitals                                                                                               | 42    | 38    |
| Private hospitals                                                                                             | 58    | 62    |
| all hospitals                                                                                                 | 100   | 100   |
| Average duration of stay (0.0 days) by type of hospital                                                       |       |       |
| Govt. hospitals                                                                                               | 10.9  | 10.8  |
| Private hospitals                                                                                             | 8.3   | 7.3   |
| <b>Cost of Treatment</b>                                                                                      |       |       |
| Average medical expenditure (Rs.) for non-hospitalised treatment per ailing person during a period of 15 days |       |       |
| Male                                                                                                          | 275   | 322   |
| Female                                                                                                        | 240   | 291   |
| Person                                                                                                        | 257   | 306   |
| Average total expenditure (Rs.) for non-hospitalised treatment per ailing person during a period of 15 days   |       |       |
| Medical expenditure:                                                                                          |       |       |
| Govt. sources                                                                                                 | 11    | 7     |
| Private sources                                                                                               | 246   | 299   |
| Other expenditure                                                                                             | 27    | 20    |
| Total                                                                                                         | 285   | 326   |
| Average medical expenditure (Rs.) per hospitalisation during a period of 365 days                             |       |       |
| Male                                                                                                          | 5,946 | 9,535 |
| Female                                                                                                        | 5,406 | 8,112 |
| Person                                                                                                        | 5,695 | 8,851 |

*Continued*



## Highlights

|                                                                                                                        | Rural | Urban  |
|------------------------------------------------------------------------------------------------------------------------|-------|--------|
| <b>Average total expenditure (Rs.) for hospitalised treatment per hospitalisation case during a period of 365 days</b> |       |        |
| Medical expenditure:                                                                                                   |       |        |
| Govt. sources                                                                                                          | 3,238 | 3,877  |
| Private sources                                                                                                        | 7,408 | 11,553 |
| Other expenditure                                                                                                      | 530   | 516    |
| Total                                                                                                                  | 6,225 | 9,367  |
| <b>B. Immunisation of children aged 0 –4 years</b>                                                                     |       |        |
| <b>Number (per 1000) of children of age 0 – 4 years receiving any immunisation during a period of 365 days</b>         |       |        |
| Boys                                                                                                                   | 893   | 934    |
| Girls                                                                                                                  | 892   | 937    |
| Children                                                                                                               | 892   | 936    |
| <b>Average expenditure incurred (Rs. 0.0) on immunisation during a period of 365 days</b>                              |       |        |
| Boys                                                                                                                   | 22.3  | 109.2  |
| Girls                                                                                                                  | 17.4  | 118.3  |
| Children                                                                                                               | 19.9  | 113.4  |
| <b>C. Pregnancy, Childbirth &amp; Maternity Care</b>                                                                   |       |        |
| <b>Number (per 1000) of women of age 15 – 49 years pregnant any time during a period of 365 days</b>                   | 127   | 107    |
| <b>Number (per 1000) of pregnant women of age 15 – 49 years who delivered a child</b>                                  | 716   | 694    |
| <b>Percentage distribution of women who delivered a child during a period of 365 days by place of delivery</b>         |       |        |
| Government hospital                                                                                                    | 183   | 310    |
| Private hospital                                                                                                       | 166   | 429    |
| Home                                                                                                                   | 651   | 261    |
| <b>Average expenditure per childbirth during a period of 365 days by place of delivery</b>                             |       |        |
| Government hospital                                                                                                    | 1,165 | 994    |
| Private hospital                                                                                                       | 4,137 | 5,480  |
| Home                                                                                                                   | 414   | 552    |
| all                                                                                                                    | 1,169 | 2,806  |
| <b>Number (per 1000) of pregnant women of age 15 – 49 years who availed of maternal care service</b>                   |       |        |
| Antenatal care services                                                                                                | 698   | 836    |
| Post-natal care services                                                                                               | 626   | 729    |
| <b>Average expenditure (Rs.) on maternal care service</b>                                                              |       |        |
| Antenatal care services                                                                                                | 499   | 905    |
| Post-natal care services                                                                                               | 402   | 595    |

*Continued*



## Highlights

|                                                                                          | Rural | Urban |
|------------------------------------------------------------------------------------------|-------|-------|
| <b>D. Condition of the Aged (60 yrs. or more)</b>                                        |       |       |
| <b>Number (per 1000) of aged in the population</b>                                       |       |       |
| Male                                                                                     | 70    | 62    |
| Female                                                                                   | 71    | 71    |
| Person                                                                                   | 70    | 66    |
| <b>Old-age dependency ratio (aged per 1000 of persons of age 15-59 yrs.)</b>             | 125   | 103   |
| <b>Sex-ratio among the aged</b>                                                          | 985   | 1046  |
| <b>Percentage distribution of the aged by their living arrangement</b>                   |       |       |
| Living alone                                                                             | 5     | 4     |
| With spouse                                                                              | 58    | 58    |
| Children                                                                                 | 33    | 33    |
| Others                                                                                   | 4     | 5     |
| Total                                                                                    | 100   | 100   |
| <b>Percentage of the aged depending on others for day-to-day maintenance</b>             | 67    | 64    |
| <b>Category of persons supporting the dependent aged</b>                                 |       |       |
| Spouse                                                                                   | 13    | 15    |
| Own Children                                                                             | 78    | 76    |
| Grand children                                                                           | 3     | 3     |
| Others                                                                                   | 6     | 6     |
| Total                                                                                    | 100   | 100   |
| <b>Number (per 1000) of aged persons who cannot move and are confined to bed or home</b> |       |       |
| Male                                                                                     | 67    | 68    |
| Female                                                                                   | 88    | 100   |
| Person                                                                                   | 77    | 84    |

# Contents

## Page No.

|               |                                                  |             |
|---------------|--------------------------------------------------|-------------|
| Chapter One   | Introduction                                     | 1 – 4       |
| Chapter Two   | Concepts and Definitions                         | 5 – 8       |
| Chapter Three | Morbidity and Hospitalisation                    | 9 – 43      |
| Chapter Four  | Immunisation and Maternity Health Care           | 44 – 53     |
| Chapter Five  | Condition and Health Care of the Aged            | 54 – 65     |
| Appendix A    | Detailed tables                                  | A-1 – A-380 |
| Appendix B    | Coverage, Sample Design and Estimation Procedure | B-1 – B-11  |
| Appendix C    | Schedule 25.0: Morbidity and Health Care         | C-1 – C-10  |

### Detailed tables

| table no.                                     | title                                                                                                                                                                                                   | page no. |
|-----------------------------------------------|---------------------------------------------------------------------------------------------------------------------------------------------------------------------------------------------------------|----------|
| <b>Part A1: Morbidity and Hospitalisation</b> |                                                                                                                                                                                                         |          |
| 1                                             | Number of villages/blocks, households, persons, aged (60 years and above) persons surveyed, number of hospitalised and ailing persons surveyed and average household size, separately for each State/UT | A-1      |
| 2                                             | Per 1000 distribution of households by type of structure for (i) each monthly per capita expenditure (mpce) class, (ii) each social-group and (iii) each household type                                 | A-7      |
| 3                                             | Per 1000 distribution of households by major source of drinking water for (i) each mpce class, (ii) each social group, and (iii) each household type                                                    | A-10     |
| 4                                             | Proportion of households treating water before drinking and per 1000 distribution of such households by type of water treatment for each major source of drinking water                                 | A-13     |
| 5                                             | Number per 1000 households treating water before drinking and per 1000 distribution of such households by type of water treatment for each mpce class                                                   | A-15     |
| 6                                             | Per 1000 distribution of households by primary source of energy for cooking for each MPCE class                                                                                                         | A-17     |
| 7                                             | Number per 1000 of households having pet animals and per 1000 distribution of such households by mpce class for each State/UT                                                                           | A-20     |

Continued

| table no. | title                                                                                                                                                                                                                                                 | page no. |
|-----------|-------------------------------------------------------------------------------------------------------------------------------------------------------------------------------------------------------------------------------------------------------|----------|
| 8         | Per 1000 distribution of persons by age-group for each sex                                                                                                                                                                                            | A-26     |
| 9         | Per 1000 distribution of persons of age 5 years and above by general educational level for each age-group and sex                                                                                                                                     | A-31     |
| 19        | Number of hospitalisation cases during last 365 days and number of cases among these where any medical services were provided by the employer by source of treatment for each age-group                                                               | A-40     |
| 20        | Rate of hospitalisation (number per 1,00,000) during last 365 days by sex and broad age-group                                                                                                                                                         | A-43     |
| 21        | Rate of hospitalised persons (number per 1,00,000) during last 365 days by sex and broad age-group                                                                                                                                                    | A-45     |
| 22        | Per 1000 distribution of hospitalised cases during last 365 days by nature of ailment for different age-groups and sex                                                                                                                                | A-47     |
| 23        | Per 1000 distribution of hospitalisation cases by type of hospital and type of ward for each mpce class and sex                                                                                                                                       | A-65     |
| 24        | Per 1000 distribution of hospitalised cases receiving treatment during last 365 days by time when admitted into hospital and by time when discharged from hospital for each type of hospital and sex of patient                                       | A-74     |
| 25        | Per 1000 distribution of hospitalisation cases by duration of stay in hospital and average duration of stay in hospital (in 0.0 days) for each type of hospital                                                                                       | A-77     |
| 26        | Per 1000 distribution of hospitalisation cases by duration of stay in hospital and average duration of stay in hospital separately for government and private hospitals and for each mpce class                                                       | A-80     |
| 27        | Number per 1000 cases of hospitalisation receiving specific types of medical service and their break-up by payment category for different types of hospital                                                                                           | A-87     |
| 28        | Number per 1000 of hospitalisation cases receiving treatment before hospitalisation and per 1000 distribution of such cases by source of treatment availed of for each type of hospital where admitted and sex                                        | A-92     |
| 29        | Number per 1000 cases of hospitalisation that received treatment after discharge from hospital and per 1000 distribution of such cases by source of treatment availed of for each type of hospital where admitted and sex                             | A-95     |
| 30        | Average total medical expenditure (Rs.) for treatment per hospitalisation case during the stay at hospital (as inpatient) for last 365 days by type of hospital (Govt./Pvt), mpce class and sex                                                       | A-98     |
| 31        | Average expenditure (Rs.) per hospitalisation case on account of hospitalisation for each mpce class and sex                                                                                                                                          | A-101    |
| 32        | Average total expenditure on account of hospitalisation per household and per 1000 distribution of total household expenditure on account of hospitalisation by source of finance for each mpce class                                                 | A-106    |
| 33        | Average medical expenditure (Rs.) for treatment under different heads of treatment during stay at hospitals as inpatient during last 365 days per hospitalisation case receiving medical treatment for each type of hospital, mpce class of household | A-109    |
| 34        | Number per 1000 of hospitalised cases getting reimbursement, average amount of reimbursement and per 1000 distribution of such cases by source for mpce class of households                                                                           | A-124    |

Continued

| table no. | title                                                                                                                                                                                                                                                                                                                | page no. |
|-----------|----------------------------------------------------------------------------------------------------------------------------------------------------------------------------------------------------------------------------------------------------------------------------------------------------------------------|----------|
| 35        | Number per 1000 of persons reporting ailment during the last 15 days by sex and age-group for each State/UT                                                                                                                                                                                                          | A-127    |
| 36        | Number per 1000 of persons reporting ailment during the last 15 days by mpce class and social group for each sex and State/UT                                                                                                                                                                                        | A-133    |
| 37        | Number per 1000 of persons suffering from ailment on the day before the date of survey by sex and age-group                                                                                                                                                                                                          | A-151    |
| 38        | Number of persons per 1,00,000 reporting onset of ailments during last 15 days and average duration of ailment by sex and age-group                                                                                                                                                                                  | A-157    |
| 39        | Number per 1,00,000 of persons reporting onset of specific ailments during last 15 days and average duration of ailment by broad ailment type                                                                                                                                                                        | A-160    |
| 40        | Average number of spells of ailment during last 15 days, average time of indisposition during last 15 days, average total duration of ailment and average loss of household income due to ailment during last 15 days for each age-group                                                                             | A-166    |
| 41        | Number per 1000 of spells of ailment during last 15 days treated on medical advice and per 1000 distribution of untreated spells of ailments not given medical treatment by reason for not taking treatment for each mpce class and social-group                                                                     | A-169    |
| 42        | Number of spells of ailments receiving treatment from non- government sources per 1000 of treated spells during last 15 days and their distribution by reason for not taking treatment from govt. sources for each mpce class                                                                                        | A-178    |
| 43        | Number per 1000 untreated spells of ailment reporting measures taken for recovery/relief (other than medical treatment), per 1000 distribution of such spells of ailments by measure taken for recovery/relief and average expenditure incurred for such measures for recovery/relief separately for each mpce class | A-187    |
| 44        | Average medical expenditure (Rs.) for treatment (other than as inpatient) under different heads per ailing person medically treated during last 15 days by mpce class                                                                                                                                                | A-196    |
| 45        | Average total expenditure incurred during the last 15 days on account of treatment per ailing person (but not as inpatient of a hospital) for each sex and mpce class                                                                                                                                                | A-205    |
| 46        | Per 1000 distribution of ailing persons among those who were medically treated but not as inpatient of hospital during last 15 days by type of payment made for availing some services for each category of specific medical service for each State/UT                                                               | A-210    |
| 47        | Per 1000 distribution of total household expenditure incurred during the last 15 days in connection with treatment (other than as inpatient of hospital) by source of finance for each mpce class and social group                                                                                                   | A-222    |
| 48        | Number per 1000 of treated persons getting reimbursement for treatment and per 1000 distribution of total amount of reimbursement by source of reimbursement for each sex, mpce class and social-group                                                                                                               | A-225    |

Continued

| table no.                                             | title                                                                                                                                                                                                                                                                                                                                                                                    | page no. |
|-------------------------------------------------------|------------------------------------------------------------------------------------------------------------------------------------------------------------------------------------------------------------------------------------------------------------------------------------------------------------------------------------------------------------------------------------------|----------|
| <b>Part A2: Immunisation and Maternal Health</b>      |                                                                                                                                                                                                                                                                                                                                                                                          |          |
| 49                                                    | Number per 1000 of children (0 – 4 years) receiving any type of immunisation and average expenditure incurred by sex for each mpce class and social group                                                                                                                                                                                                                                | A-231    |
| 50                                                    | Per 1000 number of ever married women aged 15 - 49 yrs. who were pregnant any time during last 365 days, their distribution by status of pregnancy and place of childbirth, and average expenditure incurred per case of childbirth, separately for each age-group, mpce class and social group                                                                                          | A-234    |
| 51                                                    | (i) Per 1000 distribution of ever married pregnant women (15 - 49 yrs.) during last 365 days, by source of receiving pre-natal care, (ii) per 1000 distribution of ever married pregnant women (15 - 49 yrs.) who gave child birth by source of receiving post-natal care, and (iii) average expenditure on pre-natal care and post-natal care by type of institution for each age-group | A-240    |
| <b>Part A3: Condition and Health Care of the Aged</b> |                                                                                                                                                                                                                                                                                                                                                                                          |          |
| 10                                                    | Per 1000 distribution of aged persons by number of living children for each sex and State/UT                                                                                                                                                                                                                                                                                             | A-243    |
| 11                                                    | Per 1000 distribution of aged persons by state of economic independence for each sex                                                                                                                                                                                                                                                                                                     | A-261    |
| 12                                                    | Per 1000 distribution of fully economically independent aged persons by number of dependants for each sex and State/UT                                                                                                                                                                                                                                                                   | A-270    |
| 13                                                    | Per 1000 distribution of economically dependent aged persons by category of persons financially supporting the aged person for each sex                                                                                                                                                                                                                                                  | A-288    |
| 14                                                    | Per 1000 distribution of aged persons by type of living arrangement for each sex and State/UT                                                                                                                                                                                                                                                                                            | A-297    |
| 15                                                    | Per 1000 distribution of aged persons living alone or living with spouse only by location of residence of any child/ grandchild or sibling for each sex                                                                                                                                                                                                                                  | A-315    |
| 16                                                    | Per 1000 distribution of aged persons by state of physical mobility for each age-group and sex                                                                                                                                                                                                                                                                                           | A-324    |
| 17.1                                                  | Per 1000 distribution of aged persons with illness or otherwise by their perception about current state of health for each mpce class and sex                                                                                                                                                                                                                                            | A-327    |
| 17.2                                                  | Per 1000 distribution of aged persons with illness or otherwise by their perception about current state of health for each sex                                                                                                                                                                                                                                                           | A-336    |
| 18.1                                                  | Per 1000 distribution of aged persons with illness or otherwise by their perception about change in state of health for each quintile class and sex                                                                                                                                                                                                                                      | A-354    |
| 18.2                                                  | Per 1000 distribution of aged persons with illness or otherwise by their perception about change in state of health for each sex                                                                                                                                                                                                                                                         | A-363    |

## Chapter One

### Introduction

1.1.1 The National Sample Survey Organisation (NSSO) was set up in 1950 as a permanent survey organisation to collect data on various facets of the Indian economy through nationwide sample surveys in order to assist in socio-economic planning and policy-making. The National Sample Survey made its first attempt to collect information on morbidity in the seventh round (Oct. 1953 - March 1954). This survey and the morbidity surveys conducted in the three subsequent rounds (the eleventh to the thirteenth, 1956-58) were all exploratory in nature. The aim of these surveys was to evolve an appropriate data collection method for studying morbidity profile in India. These surveys were followed up by a pilot survey in the seventeenth round (Sept. 1961 - July 1962) to examine alternative approaches of morbidity reporting. With the aid of the findings of these exploratory surveys, a full-scale survey on morbidity was conducted in the twenty-eighth round (Oct. 1973 - June 1974). Since then, the NSSO had not undertaken any separate morbidity survey and data on morbidity became a part of the decennial surveys on social consumption.

1.1.2 The NSSO carried out the first all-India Survey on Social Consumption in its 35<sup>th</sup> round (July 1980 - June 1981). The items covered were the public distribution system, health services including mass immunisation and family welfare programmes, and educational services. The results of the survey could not be brought out owing to some unavoidable reasons. The second survey on Social Consumption was carried out in the 42<sup>nd</sup> round (July 1986 - June 1987) with some modifications in the coverage of subjects. Topics like Problems of Aged Persons were included in this round. The third Survey on Social Consumption was carried out in the 52<sup>nd</sup> round (July 1995 - June 1996). Two topics, viz. utilisation of the public distribution system and utilisation of family planning services, were dropped, as these were covered in the NSS 50<sup>th</sup> round and in a nationwide survey by the Ministry of Health and Family Welfare, respectively.

1.1.3 After a gap of about nine years, the Governing Council decided to take up a survey on 'Morbidity and Health care' at the request of Ministry of Health and Family Welfare, during the period January to June, 2004.

### 1.2 The Present Report

1.2.1 The present report is based on the enquiry on morbidity and health care conducted in the 60<sup>th</sup> round (January - June 2004) of the NSSO. The enquiry covered the curative aspects of the general health care system in India and also the utilization of health care services provided by the public and private sector, together with the expenditure incurred by the households for availing these services.

This report presents the survey results relating to all these aspects viz., the utilisation of the curative health care services, morbidity profile of the population, hospitalised and non-hospitalised treatment of ailments together with the estimates of expenditure incurred for treatment of ailments. In addition, results on problems of the aged persons are also provided separately in the report.



1.2.2 Layout of the report: The report contains five chapters and three appendices. Apart from this chapter, Chapter Two provides the concepts and definitions used for the purpose of survey on morbidity and health care. Chapters three, four and five discuss the summary results of the survey and attempts to provide a perspective for proper interpretation of the results. While Chapter Three discusses the survey estimates relating to Morbidity and Hospitalisation, Chapter Four deals with estimates on Immunisation and Maternal Health Care. In Chapter Five, the survey results on Conditions and Health Care of the Aged have been discussed. The detailed survey results in the form of tables are given for rural and urban India in Appendix A, which is sub-divided into three parts, viz. Part A1, Part A2 and Part A3, giving, respectively, the tables relating to and discussed in Chapters Three, Four and Five. While the sample design and estimation procedure have been outlined in Appendix B, the facsimile of the schedule is given in Appendix C.

1.2.3 The estimates presented in the report are based on the data from the *Central sample only* (pooled data of the two *sub-samples*). The survey results presented in the report are mostly in the form of ratios. The basic aggregate estimates of population and number of households, given in the detailed tables of the Appendix, generally as marginal column totals, may be used for working out rates and ratios for domains not presented in the report.

### 1.3 Sixtieth Round

1.3.1 In the Sixtieth round of NSS, data was collected through a survey on the subject of 'Morbidity and Health Care'. Apart from this subject, surveys were also undertaken separately on 'Household Consumer Expenditure' and 'Employment and Unemployment'. In the survey on Morbidity and Health Care, the following main aspects were covered:

- (i) Morbidity and utilisation of health care services including immunisation and maternity care,
- (ii) Problems of aged persons, and
- (iii) Expenditure of the households for availing the health care services.

1.3.2 The object of the present survey was essentially to study the benefits derived by various sections of the population from investments and outlays made by the Government, as well as by the private sector in the fields of health and get an estimate of expenditure incurred by households to avail health care services including immunization and maternity care.

### 1.4 Geographical coverage

1.4.1 The entire area of the country was covered with the exception of some interior areas of Nagaland and Andaman & Nicobar Islands, and Leh (Ladakh) and Kargil districts of Jammu & Kashmir.

### 1.5 Method of Data Collection

1.5.1 The present report is based on the information on morbidity and health care services collected in Schedule 25.0. The data were collected from a sample of households by the interview method. A set of probing questions was put to as many individual members of a selected household as possible to ascertain whether they had suffered from any ailment during the reference period and whether they had taken any medical treatment for it. As far as possible, efforts were made to collect information relating to ailments of each household member from the member themselves. But in spite of the best efforts, some other person of the household might have provided this information, especially for the children and the aged

persons in the household. Efforts were made to interview all the adult male members of each sample household, personally. For the children, particularly the young, attempts were made to get the required information from their mothers.

## 1.6 Reference period

1.6.1 The enquiry on morbidity was conducted with a reference period of 15 days. All spells of ailment suffered by each member, both present as well as the deceased, of the sample household, during the 15 days preceding the date of enquiry, whether or not the patient was hospitalised for treatment, were covered in the survey. For hospitalised treatment, however, information was collected for every event of hospitalisation of a member, whether living or deceased at the time of survey, during the 365 days preceding the date of enquiry.

## 1.7 Sample design

1.7.1 The sample design adopted for the survey was essentially a two-stage stratified design, with census villages and urban blocks as the first-stage units (FSUs) for the rural and urban areas respectively, and households as the second-stage units (SSUs). The survey period, January - June 2004, was split up into two sub-rounds of three months each. The rural and urban samples of FSUs were drawn independently in the form of two sub-samples and equal numbers of FSUs of each sub-sample were allocated for the two sub-rounds. (For a detailed discussion on sample design, see Appendix B.)

1.7.2 *Sample size -- first-stage units:* In all, 10,072 villages were planned to be surveyed in this round. Of these, 4,908 were allocated to the central sample -- the part surveyed mainly by the NSSO field staff -- and the rest to the State sample -- the part surveyed by the State agencies. In the urban sector, the allocations for the Central and State samples were, respectively, 2,708 and 3,096 blocks. This report is based on the estimates obtained from the central sample alone. The number of villages and that of urban blocks actually surveyed as the central sample were 4,755 and 2,668 respectively.

1.7.3 *Sample size -- second-stage units:* For Schedule 25.0, 10 households were planned to be surveyed in each selected FSU. In the Central sample, the actual numbers of households surveyed in the rural and urban areas were 47,302 and 26,566, respectively. The number of villages and blocks allotted and surveyed, and the number of households surveyed in the rural and urban sectors of each State/UT are given in Statement 1.



Statement 1: Number of sample villages/blocks allotted and surveyed, and the households surveyed in the central sample for NSS 60<sup>th</sup> round survey

| State /UT                 | villages / blocks |              |              |              | households surveyed |               |
|---------------------------|-------------------|--------------|--------------|--------------|---------------------|---------------|
|                           | allotted          |              | surveyed     |              | rural               | urban         |
|                           | rural             | urban        | rural        | urban        |                     |               |
| (1)                       | (2)               | (3)          | (4)          | (5)          | (6)                 | (7)           |
| Andhra Pradesh            | 328               | 184          | 325          | 183          | 3235                | 1824          |
| Arunachal Pradesh         | 76                | 32           | 75           | 32           | 732                 | 320           |
| Assam                     | 220               | 48           | 215          | 48           | 2150                | 480           |
| Bihar                     | 360               | 64           | 354          | 64           | 3536                | 638           |
| Chhattisgarh              | 112               | 40           | 107          | 40           | 1070                | 400           |
| Delhi                     | 8                 | 100          | 8            | 100          | 78                  | 961           |
| Goa                       | 8                 | 12           | 8            | 12           | 79                  | 120           |
| Gujarat                   | 152               | 132          | 150          | 131          | 1497                | 1309          |
| Haryana                   | 88                | 56           | 86           | 55           | 851                 | 549           |
| Himachal Pradesh          | 132               | 20           | 126          | 20           | 1239                | 200           |
| Jammu & Kashmir           | 136               | 68           | 83           | 38           | 821                 | 380           |
| Jharkhand                 | 144               | 60           | 141          | 60           | 1398                | 598           |
| Karnataka                 | 192               | 152          | 185          | 152          | 1847                | 1518          |
| Kerala                    | 200               | 100          | 184          | 100          | 1839                | 990           |
| Madhya Pradesh            | 232               | 128          | 229          | 128          | 2281                | 1280          |
| Maharashtra               | 272               | 272          | 265          | 267          | 2650                | 2664          |
| Manipur                   | 108               | 52           | 107          | 52           | 1070                | 520           |
| Meghalaya                 | 56                | 24           | 56           | 24           | 536                 | 239           |
| Mizoram                   | 44                | 64           | 41           | 64           | 394                 | 631           |
| Nagaland                  | 24                | 12           | 24           | 12           | 240                 | 120           |
| Orissa                    | 212               | 56           | 211          | 56           | 2094                | 560           |
| Punjab                    | 84                | 68           | 82           | 68           | 816                 | 676           |
| Rajasthan                 | 236               | 108          | 234          | 108          | 2311                | 1072          |
| Sikkim                    | 44                | 8            | 44           | 8            | 440                 | 80            |
| Tamil Nadu                | 260               | 260          | 254          | 260          | 2540                | 2599          |
| Tripura                   | 84                | 24           | 82           | 24           | 820                 | 240           |
| Uttaranchal               | 36                | 20           | 36           | 20           | 346                 | 200           |
| Uttar Pradesh             | 680               | 264          | 671          | 264          | 6682                | 2627          |
| West Bengal               | 324               | 188          | 317          | 188          | 3170                | 1879          |
| Andaman & Nicobar Islands | 16                | 12           | 15           | 12           | 140                 | 120           |
| Chandigarh                | 8                 | 36           | 8            | 34           | 80                  | 333           |
| Dadra & Nagar Haveli      | 8                 | 8            | 8            | 8            | 80                  | 80            |
| Daman & Diu               | 8                 | 8            | 8            | 8            | 80                  | 79            |
| Lakshadweep               | 8                 | 8            | 8            | 8            | 80                  | 80            |
| Pondicherry               | 8                 | 20           | 8            | 20           | 80                  | 200           |
| <b>All India</b>          | <b>4,908</b>      | <b>2,708</b> | <b>4,755</b> | <b>2,668</b> | <b>47,302</b>       | <b>26,566</b> |

## Chapter Two

### Concepts and Definitions

2.1.1 The concepts and definitions of the terms used in this report are briefly discussed in this chapter. For better morbidity reporting, some probing questions were put to the informants during data collection. Such special attempts to elicit information on morbidity and treatment of ailments are also indicated in this chapter.

2.2 **Household:** A group of persons normally living together and taking food from a common kitchen constitutes a household. The word “normally” means that temporary visitors are excluded but temporary stay-aways are included. Thus a son or daughter residing in a hostel for studies is excluded from the household of his/her parents, but a resident employee or resident domestic servant or paying guest (but not just a tenant in the house) is included in the employer/host’s household. “Living together” is usually given more importance than “sharing food from a common kitchen” in drawing the boundaries of a household in case the two criteria are in conflict; however, in the special case of a person taking food with his family but sleeping elsewhere (say, in a shop or a different house) due to space shortage, the household formed by such a person’s family members is taken to include the person also. Each inmate of a mess, hotel, boarding lodging house, hostel, etc., is considered as a single-member household but a family living in a hotel is considered to be one household only; the same applies to residential staff of such establishments.

2.3.1 **Ailment - illness or injury:** Ailment, i.e. illness or injury, mean any deviation from the state of physical and mental well-being. An ailment may not cause any necessity of hospitalisation, confinement to bed or restricted activity. An ailing member is a normal member of the household who was suffering from any ailment during the reference period. For the purpose of survey, one will be treated as sick if one feels sick. This will also include among other things:

- Cases of visual, hearing, speech, locomotor and mental disabilities;
- Injuries will cover all types of damages, such as cuts, wounds, haemorrhage, fractures and burns caused by an accident, including bites to any part of the body;
- Cases of spontaneous abortion - natural or accidental;

This will not include:

- Cases of sterilisation, insertion of IUD, getting MTP, etc.,
- Cases of pregnancy and childbirth.

Cases of sterilisation, insertion of IUD, getting MTP, etc., under family planning programme, pregnancy and child birth are not treated as ailment. But a spontaneous abortion, is treated as a deviation from the state of normal health and thus considered to be illness.

2.3.2 For ascertaining whether an individual had suffered from any ailment during the reference period and whether she/he had received any medical treatment on that account, the following set of probing questions was put, in the survey, to the informant:

- During the reference period, did the member feel anything wrong relating to skin, head, eyes, ears, nose, throat, arms, hands, chest, heart, stomach, liver, kidney, legs, feet or any other organ of the body?
- Does the member suffer from any disease of a chronic nature relating to stomach, lungs, nervous system, circulation system, bones and joints, eye, ear, mouth or any other organ of the body?
- Does the member have any kind of hearing, visual, speech or locomotor disability?
- Did the member take, during the reference period, any medicine or medical advice for his/her own ailment or injury?

**2.4 Hospitalisation:** One was considered hospitalised if one had availed of medical services as an indoor patient in any hospital. Hospital, for the purpose of survey, referred to any medical institution having provision for admission of sick persons as indoor patients (inpatients) for treatment. Hospitals covered public hospitals, community health centres and primary health centres (if provided with beds), ESI hospitals, private hospitals, nursing homes, etc. In this context it may be noted that admission for treatment of ailment and discharge thereof from the hospital was considered as case of hospitalisation irrespective of the duration of stay in the hospital. It may also be noted that hospitalisation in the cases of normal pregnancy and childbirth were treated as hospitalisation cases.

**2.5 Confinement to bed:** It referred to a state of health where the ailing person is required or compelled to mostly stay in bed at his/her residence/home.

**2.6 Restriction of activity:** By disability or restricted activity it was meant the state of health which prevents the ailing person from doing any of his/her normal avocation. For economically employed persons, restricted activity meant abstention from the economic activity. In the case of a housewife, this meant cutting down of the day's chores. In the case of retired persons, this referred to the pruning of his/her normal activity. In the case of students attending educational institution, this referred to abstention from attending classes. For infants below school going age and for the very old, restricted activity was not to be considered in view of the fact that their usual activities are of restricted nature.

**2.7 Spell of ailment:** A continuous period of sickness owing to a specific ailment will be treated as a spell of ailment.

**2.8 Duration of ailment:** Duration of ailment is the period between the commencement of the ailment and termination of it by recovery. For ascertaining the period of ailment during the reference period, commencement was taken as on the first day of the reference period if it was on a day beyond the reference period. Similarly, if the ailment was found to be continuing on the date of enquiry, the day of termination of the ailment was taken as the last day of the reference period.

**2.9 Medical treatment:** A person was considered to have received medical treatment if he/she had consulted a doctor anywhere (in OPD of a hospital, community health centre, primary health centre/sub-centre, dispensary, doctor's chamber, private residence, etc.) and obtained medical advice on his/her ailment. The doctor consulted may follow any system of medicine, viz. allopathic, homeopathic, ayurvedic, unani, hakimi or some other recognised system. Treatment taken on the basis of medical advice/prescription of a doctor obtained earlier for similar ailment(s) was also considered as medical treatment. Self-doctoring or

1  
2  
3 acting on the advice of non-medical persons such as friends, relatives, pharmacists, etc., was  
4 not considered as treatment.  
5  
6

7  
8 **2.10 Expenditure for medical treatment:** Total expenditure incurred for medical treatment  
9 received during the reference period (15 days for non-hospitalised treatment and 365 days for  
10 hospitalised treatment) included expenditure on items like

11 bed charges (with charges for food included in it)  
12 medicines (including drips)  
13 materials for bandage, plaster, etc.  
14 fees for the services of medical and para-medical personnel  
15 charges - for diagnostic tests  
16 operations and therapies  
17 charges of ambulance  
18 costs of oxygen, blood, etc.  
19  
20  
21

22 All other types of expenditure incurred for treatment, such as lodging charges of escort,  
23 attendant charges, cost of transport other than ambulance, and cost of personal medical  
24 appliances, were excluded from medical expenditure.  
25  
26

27 **2.11 Disability:** A person with restrictions or lack of abilities to perform an activity in the  
28 manner or within the range considered normal for a human being was treated as having  
29 disability. It excluded illness/injury of recent origin (morbidity) resulting into temporary loss  
30 of ability to see, hear, speak or move.  
31  
32

33 **2.11.1 Mental disability:** Persons who had difficulty in understanding routine instructions,  
34 who do not carry out their activities like others of similar age or exhibit behaviours like  
35 talking to self, laughing / crying, staring, violence, fear and suspicion without reason were  
36 considered as mentally disabled for the purpose of the survey. The “activities like others of  
37 similar age” included activities of communication (speech), self-care (cleaning of teeth,  
38 wearing clothes, taking bath, taking food, personal hygiene, etc.), home living (doing some  
39 household chores) and social skills.  
40  
41  
42

43 **2.11.2 Visual disability:** By visual disability, it was meant, loss or lack of ability to execute  
44 tasks requiring adequate visual acuity. For the survey, visually disabled included (a) those  
45 who did not have any light perception - both eyes taken together and (b) those who had light  
46 perception but could not correctly count fingers of hand (with spectacles/contact lenses if  
47 he/she used spectacles/contact lenses) from a distance of 3 metres (or 10 feet) in good day  
48 light with both eyes open. Night blindness was not considered as visual disability.  
49  
50

51 **2.11.3 Hearing disability:** This refers to persons’ inability to hear properly. Hearing  
52 disability was to be judged taking into consideration the disability of the better ear. In other  
53 words, if one ear of a person was normal and the other ear has total hearing loss, then the  
54 person was to be judged as normal in hearing for the purpose of the survey. Hearing  
55 disability was judged without taking into consideration the use of hearing aids (i.e., the  
56 position for the person when hearing aid was not used). Persons with hearing disability might  
57 have different degrees of disability, such as profound, severe or moderate. A person was  
58 treated as having ‘profound’ hearing disability if he/she could not hear at all or could only  
59 hear loud sounds, such as, thunder or understands only gestures. A person was treated as  
60 having ‘severe’ hearing disability if he/she could hear only shouted words or can hear only if

1  
2  
3 the speaker is sitting in the front. A person was treated as having ‘moderate’ hearing  
4 disability if his/her disability was neither profound nor severe. Such a person would usually  
5 ask to repeat the words spoken by the speaker or would like to see the face of the speaker  
6 while he/she spoke or felt difficulty in conducting conversations.  
7  
8

9  
10 2.11.4 **Speech disability:** This referred to persons’ inability to speak properly. Speech of a  
11 person was judged to be disordered if the person's speech was not understood by the listener.  
12 Persons with speech disability included those who cannot speak, can speak only with limited  
13 words or those with loss of voice. It also included those whose speech was not understood  
14 due to defects in speech, such as stammering, nasal voice, hoarse voice and discordant voice  
15 and articulation defects, etc.  
16

17  
18 2.11.5 **Locomotor disability:** A person with - (a) loss or lack of normal ability to execute  
19 distinctive activities associated with the movement of himself/herself and objects from place  
20 to place and (b) physical deformities, other than those involving the hand or leg or both,  
21 regardless of whether the same caused loss or lack of normal movement of body – was  
22 considered as disabled with locomotor disability. Thus, persons having locomotor disability  
23 included those with (a) loss or absence or inactivity of whole or part of hand or leg or both  
24 due to amputation, paralysis, deformity or dysfunction of joints which affects his/her “normal  
25 ability to move self or objects” and (b) those with physical deformities in the body (other than  
26 limbs), such as, hunch back, deformed spine, etc. Dwarfs and persons with stiff neck of  
27 permanent nature who generally did not have difficulty in the normal movement of body and  
28 limbs were also treated as disabled.  
29  
30

31  
32 2.12 **Abortion:** Abortion is the case of foetus born before the completion of 28 weeks since  
33 conception and showing no sign of life at birth.  
34

35  
36 2.13 **Live-birth:** When a child shows any evidence of life at birth, irrespective of the interval  
37 since conception, it is the case of a live-birth. The child may, however, expire within a very  
38 short time after birth.  
39

40  
41 2.14 **Still-birth:** It is the case of a baby born after completion of 28 weeks and showing no  
42 sign of life. The birth of a foetus caused by abortion is not considered a ‘still-birth’.  
43  
44  
45  
46  
47  
48  
49  
50  
51  
52  
53  
54  
55  
56  
57  
58  
59  
60



## Chapter Three

### Morbidity and Hospitalisation

#### 3.1 General

3.1.1 It may be mentioned at the outset that the National Health Policy was formulated and enacted in 1983. Since then, NSSO has conducted three nationwide surveys on utilisation of medical services by the various sections of the population. The present enquiry on morbidity and utilisation of medical services, the third in the series, has been carried out in the 60<sup>th</sup> round of the NSS during January to June, 2004. Although the objective of these surveys was essentially to study the utilisation of public and private health services by various sections of the population, the present survey specially attempts to measure the role of the private institutions vis-à-vis government institutions in providing health care services. It is important to note that of the first two enquiries, one was carried out during 1986-87 (NSS 42<sup>nd</sup> round) and the other during the post 'economic' liberalisation period 1995-96 (NSS 52<sup>nd</sup> round). The first enquiry on the subject, conducted only after three years of the enactment of the Health Policy, was, therefore, too early to register the effects of the policy. The results of the second survey are expected to reveal to some extent the effects of the National Health Policy jointly with the effect of economic liberalisation – although the period ever since the formulation and enactment of policy is assumed to be small. This present survey, therefore, assumes special significance for a comprehensive study on the general health care system in India and for measuring the role of private institutions in the health sector.

3.1.2 This chapter summarises the important findings of the survey and discusses the salient features pertaining to the curative aspects of the general health care system in India. Wherever possible, the results of the earlier rounds have been placed side by side so that trends and changes over the periods of survey may be examined. The focus is principally on the all-India estimates; as a secondary task, one proceeds to examine the disparities in the utilisation of the health services across the major states and across their rural and urban sectors. The estimates for the smaller States and Union Territories (UTs) have been neither presented nor considered for discussion in this chapter. In fact, the estimates for the 20 major states in the rural sector of the country and 21 major states in the urban sector have been presented in this chapter. The estimates for all the remaining states, group of UTs and for the group of North-eastern states (excluding Assam) appear (along with the estimates for the major states) only in the appendix to this report. The reason is that the sample sizes for the smaller states and UTs may not be adequate for getting sufficiently reliable estimates – at least for measuring change or inter-state comparison. A major state, for the rural sector, is one whose rural population exceeds one crore; a major state for the urban sector is defined similarly. Unless otherwise mentioned, state (major state) level estimates of the parameters discussed in this chapter are presented at the end of the chapter.

3.1.3 The discussion starts with observations on the distribution of households over some important characteristics that have relevance, directly or indirectly, with the conditions of living and health of the individuals. This occupies Section 2 of this chapter. Following this, Sections 3 to 6 deal with the morbidity rates, in general, and treatment of ailments, particulars of hospitalisation and cost of treatment jointly with related characteristics to reveal the multi-

dimensional aspects of the health care system of the country. The results on immunisation services received by children of age less than five years have been presented and discussed in Section 7. This section also investigates on the maternity care received by pregnant mothers. Finally, the chapter concludes with the results and discussion on the condition of the aged – those with age 60 years or more, in Section 8. In fact, it highlights the structure and composition of the aged in respect of age, sex, dependency ratio, etc. and the conditions of the aged in respect of their economic dependency, number of dependants, living arrangements, persons supporting the aged, physical immobility, etc. Note that the all-India level estimates given in this report relate to the whole of the India Union, including all the states and UTs.

**3.1.4 Use of Estimated Aggregates:** A few points on some general aspects of the survey estimates need to be stated in this paragraph. Compared to the census population or the projections thereof, population estimates from the NSSO surveys are, in general, on the lower side. This difference arises mainly due to the differences in methods and coverage adopted by the NSSO in comparison with the census operation. However, the ratios obtained from the surveys are much closer to the ratios obtained using census figures. Usually, the estimates on morbidity rates are presented as ratios, except for the estimates on expenditure on treatment, etc. To estimate an absolute number in any category, it is advisable to apply the survey estimates of ratios to the census population or projections thereof, for that category. The estimates of aggregates given in the detailed tables may help to combine the ratios but may not be used for deriving estimates of absolute numbers for a characteristic. It may also be noted that as the tables are generally presented as per thousand distributions, the figures are rounded off. Thus, while using the ratios from the survey results, it is to be noted that the accuracy of these derived aggregates will be limited to the number of significant digits available in the ratio or percentage estimates presented in the report. The estimated aggregates, wherever possible, may be used as weights for combining the ratios.

### **3.2 Household Profile**

**3.2.1** As per the survey estimates, about 959 million people lived in 199 million households in India. About 72 per cent of the households belonged to rural India and accounted for nearly 75 per cent of total population (see Table 1 in Appendix A). A household consisted, on an average, of 5.0 persons in rural areas and 4.4 persons in the urban areas. The rural population had 964 females per 1000 males while the urban had 917.

### **3.2.2 Monthly per capita expenditure (MPCE)**

**3.2.2.1** Household income, or for that matter ‘level of living’, is highly related with the ‘general health’ of the household members as well as to the extent of ‘medical care’ received by them. Thus, as the background information, the distribution of households and population by income level is useful information for a correlative study on morbidity and health care. As it is difficult to collect reliable income data, the NSSO collects data on consumption expenditure in its surveys. Since MPCE is a supplementary classificatory variable for correlative study of the main theme of the round, data was collected through a short set of 5 questions (see block [3] of Schedule 25.0 in Appendix C) rather than a detailed listing of consumption items that is used



when household consumption expenditure is the main theme of the survey. This procedure is known to underestimate the level of MPCE in comparison with the detailed schedule but expected to provide a reasonable proxy for relative ranking of the households according to level of living. The distributions of households by MPCE class for rural and urban India are presented in Statement 2.

Statement 2  
Per 1000 distribution of households by MPCE class during January – June 2004

| India            |            |                  |            |
|------------------|------------|------------------|------------|
| rural            |            | urban            |            |
| MPCE class (Rs.) | households | MPCE class (Rs.) | households |
| less than 225    | 46         | less than 300    | 27         |
| 225 – 255        | 38         | 300 – 350        | 19         |
| 255 – 300        | 88         | 350 – 425        | 51         |
| 300 – 340        | 78         | 425 – 500        | 99         |
| 340 – 380        | 93         | 500 – 575        | 45         |
| 380 – 420        | 99         | 575 – 665        | 81         |
| 420 – 470        | 102        | 665 – 775        | 110        |
| 470 – 525        | 110        | 775 – 915        | 101        |
| 525 – 615        | 109        | 915 – 1120       | 149        |
| 615 – 775        | 113        | 1120 – 1500      | 158        |
| 775 – 950        | 58         | 1500 – 1925      | 48         |
| 950 or more      | 66         | 1925 or more     | 110        |
| <i>all</i>       | 1000       | <i>all</i>       | 1000       |

households in the rural areas resided in *semi-pucca* or *kutchha* structures. The distribution in respect of the structure of dwellings is found to deteriorate for the weaker sections of the population and is worst for the Scheduled Tribes (STs). Merely 20 per cent of the households among the *STs* resided in the dwellings made of *pucca* materials, the rest living either in *semi-pucca* or in *kutchha* dwellings. *Pucca* structure is much more common in the urban areas with 84 per cent of the households reporting it. The proportion of population living in *pucca* structures was highest among the *others* category of households (90 per cent) and lowest, as expected, among the *ST* households (65 per cent). The corresponding distributions for the states and the group of UTs is given in Statement

3.1 (p. 36). It can be seen that about 75 per cent or more households, in general, in the rural areas of Chhattishgarh, Assam, Orissa, Jharkhand and West Bengal lived either in *kutchha* or in *semi-pucca* structures. Though the corresponding proportions are lower in urban areas, wide inter-

3.2.2.2 In urban India, about 32 per cent of the households spent less than Rs. 665 per month per person. On the other hand, in rural India, about 44 per cent of the households spent less than Rs.420. Over 56 per cent of the urban households spent Rs.775 or more per person per month compared to only 12 per cent in rural areas.

3.2.2.3 *Type of Structure of Dwelling:* Structure of the dwelling not only reflects the living condition of the household and its members but also has a bearing on the health conditions of the members of the household. The distribution of households by type of structure of their dwelling units is, therefore, given in Statement 3 for each household social group for the rural and urban areas. It can be seen that more than half of the

Statement 3  
Per 1000 distribution of households by structure of dwelling for each household social group

| structure of dwelling | household social group |      |      |        | India |  |
|-----------------------|------------------------|------|------|--------|-------|--|
|                       | ST                     | SC   | OBC  | others | total |  |
|                       | <b>rural</b>           |      |      |        |       |  |
| <i>pucca</i>          | 195                    | 410  | 520  | 582    | 480   |  |
| <i>semi-pucca</i>     | 570                    | 335  | 306  | 280    | 332   |  |
| <i>kutchha</i>        | 235                    | 255  | 173  | 138    | 188   |  |
| <i>all</i>            | 1000                   | 1000 | 1000 | 1000   | 1000  |  |
| <b>urban</b>          |                        |      |      |        |       |  |
| <i>pucca</i>          | 653                    | 765  | 813  | 902    | 842   |  |
| <i>semi-pucca</i>     | 259                    | 150  | 136  | 79     | 115   |  |
| <i>kutchha</i>        | 88                     | 85   | 50   | 19     | 43    |  |
| <i>all</i>            | 1000                   | 1000 | 1000 | 1000   | 1000  |  |

## Statement 4

Per 1000 distribution of households by structure of dwelling for each household monthly per capita expenditure class

| India                   |                                   |            |        |       |
|-------------------------|-----------------------------------|------------|--------|-------|
| mpce classes            | distribution by type of structure |            |        | total |
|                         | pucca                             | semi-pucca | kutcha |       |
| <b>rural</b>            |                                   |            |        |       |
| <i>less than 225</i>    | 259                               | 441        | 299    | 1000  |
| <i>225 – 255</i>        | 285                               | 411        | 304    | 1000  |
| <i>255 – 300</i>        | 319                               | 421        | 261    | 1000  |
| <i>300 – 340</i>        | 381                               | 374        | 245    | 1000  |
| <i>340 – 380</i>        | 400                               | 385        | 215    | 1000  |
| <i>380 – 420</i>        | 427                               | 373        | 199    | 1000  |
| <i>420 – 470</i>        | 477                               | 335        | 188    | 1000  |
| <i>470 – 525</i>        | 535                               | 309        | 155    | 1000  |
| <i>525 – 615</i>        | 575                               | 286        | 139    | 1000  |
| <i>615 – 775</i>        | 647                               | 243        | 110    | 1000  |
| <i>775 – 950</i>        | 740                               | 190        | 70     | 1000  |
| <i>950 &amp; above</i>  | 839                               | 115        | 47     | 1000  |
| <i>all</i>              | 480                               | 332        | 188    | 1000  |
| <b>urban</b>            |                                   |            |        |       |
| <i>less than 300</i>    | 494                               | 326        | 179    | 1000  |
| <i>300 – 350</i>        | 561                               | 274        | 165    | 1000  |
| <i>350 – 425</i>        | 654                               | 244        | 101    | 1000  |
| <i>425 – 500</i>        | 746                               | 187        | 68     | 1000  |
| <i>500 – 575</i>        | 738                               | 192        | 69     | 1000  |
| <i>575 – 665</i>        | 810                               | 145        | 45     | 1000  |
| <i>665 – 775</i>        | 857                               | 111        | 32     | 1000  |
| <i>775 – 915</i>        | 897                               | 82         | 20     | 1000  |
| <i>915 – 1120</i>       | 938                               | 50         | 12     | 1000  |
| <i>1120 – 1500</i>      | 961                               | 31         | 7      | 1000  |
| <i>1500 – 1925</i>      | 976                               | 18         | 3      | 1000  |
| <i>1925 &amp; above</i> | 993                               | 4          | 3      | 1000  |
| <i>all</i>              | 842                               | 115        | 43     | 1000  |

for drinking water of proper quality. Information collected on the major source of drinking water used by the household during the major part of a year has been presented in Statement 5 separately for the rural and urban areas. The most prevalent source, in the rural areas, is found to be 'tube-well/ hand pump'. Next in importance, as reported, were 'tap' and 'pucca well'. The proportions of households reporting the use of drinking water for the major part of the year from these three sources were 56 per cent, 25 per

State variations exist. One observes that *kutcha* structures housed 19 per cent of households in urban Orissa and 10-11 per cent of households in urban areas of Tamil Nadu and Bihar.

**3.2.2.4 MPCE Class and Type of Structure of Dwelling:** Generally, the quality of dwelling structure is known to be associated with the level of living of a household. From this angle, it is useful to examine the dwelling type in relation to the size of MPCE. It is seen from Statement 4 that in rural areas, while only 26 per cent of the poorest class (MPCE Rs. 225 or less) reported living in *pucca* dwellings, as many as 84 per cent of the richest class of households (MPCE Rs. 950 or above) lived in the *pucca* dwellings. The disparity between the poor and the rich is found to be less in the urban areas as compared to the rural areas. In fact, the proportion of households living in *pucca* dwellings ranged from 49 per cent (for MPCE Rs. 300 or less) to 99 per cent (for MPCE Rs. 1925 or above) in the urban areas.

**3.2.2.5 Major Source of Drinking Water:** The quality of water used for drinking is a very important determinant of health condition. The source from where drinking water is collected by the household roughly indicates its quality and, thus the awareness of the households of the need

## Statement 5

Per 1000 distribution of households by major source of drinking water

| India                            |       |       |             |
|----------------------------------|-------|-------|-------------|
| major source of drinking water   | rural | urban | rural+urban |
| bottled water                    | 10    | 28    | 15          |
| tap                              | 248   | 676   | 357         |
| tube-well/ hand pump             | 564   | 224   | 478         |
| tankers                          | 7     | 23    | 11          |
| pucca well                       | 139   | 44    | 115         |
| tank/ pond reserved for drinking | 13    | 2     | 10          |
| river/ canal                     | 8     | 0     | 6           |
| others                           | 10    | 3     | 8           |
| total                            | 1000  | 1000  | 1000        |

cent and 13 per cent, respectively, in the rural areas. The same three sources were the most important in urban areas, but in a different order. 'Tap' was the most important (68 per cent), followed by 'tube well/ hand pump' (22 per cent), and 'pucca well' (4 per cent). Thus these three sources together provided drinking water to 94 per cent of households in both rural and urban areas. A small but significant proportion of households, even in 2004, collected their drinking water either from a 'tank /pond reserved for drinking', or from a 'river/ canal': they formed 2 per cent of rural households in India. The estimates for the states are given in Statements 5.1R and 5.1U (pp 37-38).

**3.2.2.6 Treatment of Water before Drinking:** The water collected by a household for drinking is sometimes not consumed directly but only after some cleaning/treatment. Prior cleaning/treatment of water before drinking is good indicator of health awareness. It would, therefore, be of interest to examine the proportion of households resorting to cleaning of collected water, tabulated by source of drinking water. The relevant results are presented in Statement 6 separately for rural and urban areas of India. As a whole, a higher proportion (38 per cent) of households in the urban areas reported cleaning of water before drinking than in the rural (20 per cent). The proportions are appreciably higher among the households that collected their drinking water from 'tank/pond reserved for drinking', from 'tankers', from a 'pucca well' or from a 'river/canal'. Among all the sources, water collected from 'tube-well/hand pump' was perhaps felt to be safest for drinking as only 10 per cent of the households in the rural areas and 16 per cent of the households in the urban areas purified such water before drinking. State-level estimates on number per 1000 of households treating water before drinking are also given in Statement 5.1.

| Statement 6                                                                                          |       |       |
|------------------------------------------------------------------------------------------------------|-------|-------|
| Number per 1000 of households treating water before drinking for each major source of drinking water |       |       |
|                                                                                                      |       | India |
| major source of drinking water                                                                       | rural | urban |
| tap                                                                                                  | 291   | 436   |
| tube-well/ hand pump                                                                                 | 98    | 164   |
| tankers                                                                                              | 459   | 546   |
| pucca well                                                                                           | 366   | 570   |
| tank/ pond reserved for drinking                                                                     | 551   | 731   |
| river/ canal                                                                                         | 327   | 584   |
| others                                                                                               | 276   | 351   |
| all                                                                                                  | 199   | 375   |

**3.2.2.7 Methods Used for Treating Water before Drinking:** For those households which treated water before drinking, information on the method usually adopted by households for treating water was collected. The specified list of methods used to classify the method of treatment reported by household for which the data was collected in the survey were 'ultra-violet/resin', 'filter', 'boiling', 'cloth screen' and 'any disinfectant'. The results are given in Statement 7 in the form of distribution of households that reported treatment of water before drinking by type of treatment done, separately for rural and urban areas at all India level. Most of the rural as well as urban households used 'cloth screen' for purification of drinking water. Among the households reporting purification of water before drinking, about 63 per cent in the rural areas and nearly 40 per cent in the urban areas used the traditional method of 'cloth screen'. The most scientific method among the specified methods, 'ultra-violet/resin', was adopted by only 5 per cent in the urban areas and less than 1 per cent in the rural areas.

3.2.2.8 *Age Distribution of Population*: Any study relating to a human population remains incomplete unless its size and age-sex composition is known before its specific characteristics are examined. Thus, the distribution of population by age-group and sex, as background information, will certainly help in easy understanding of the results, particularly the study of various indicators of morbidity. In Statement 8, the distribution of population over broad age groups is presented separately for males and females in rural and urban areas. Comparable results based on the 58<sup>th</sup> round (July – December 2002) survey are also presented in this statement. It can be seen that while the proportion of boys and girls (age 0-14 years) was around 37 per cent in the rural areas, it was around 30 per cent in the urban areas. On the other hand, the aged (60 years or more) constituted a little over 7 per cent of the rural male, rural female and urban female and a little over 6 per cent of the urban male population. No marked differences can be observed between the estimates obtained from the two surveys.

**Statement 7**

Per 1000 distribution of households that treated water before drinking by type of treatment

| treatment of water before drinking | India       |             |
|------------------------------------|-------------|-------------|
|                                    | rural       | urban       |
| ultra-violet/resin                 | 8           | 53          |
| filter                             | 248         | 254         |
| boiling                            | 89          | 275         |
| cloth screen                       | 626         | 395         |
| any disinfectant                   | 11          | 10          |
| others                             | 18          | 13          |
| <b>total</b>                       | <b>1000</b> | <b>1000</b> |

**3.3 Morbidity and Health Care**

**Statement 8**

Per 1000 distribution of population by broad age group in NSS 60<sup>th</sup> and 58<sup>th</sup> rounds

| age group (years) | India                |                      |                      |                      |
|-------------------|----------------------|----------------------|----------------------|----------------------|
|                   | rural male           |                      | rural female         |                      |
|                   | 60 <sup>th</sup> rd. | 58 <sup>th</sup> rd. | 60 <sup>th</sup> rd. | 58 <sup>th</sup> rd. |
| 0-14              | 376                  | 368                  | 357                  | 351                  |
| 15-29             | 249                  | 257                  | 256                  | 255                  |
| 30-44             | 189                  | 185                  | 196                  | 201                  |
| 45-59             | 115                  | 117                  | 119                  | 117                  |
| 60 & above        | 70                   | 72                   | 71                   | 76                   |
| <b>all ages</b>   | <b>1000</b>          | <b>1000</b>          | <b>1000</b>          | <b>1000</b>          |

  

| age group (years) | urban male           |                      | urban female         |                      |
|-------------------|----------------------|----------------------|----------------------|----------------------|
|                   | 60 <sup>th</sup> rd. | 58 <sup>th</sup> rd. | 60 <sup>th</sup> rd. | 58 <sup>th</sup> rd. |
|                   | 0-14                 | 299                  | 302                  | 290                  |
| 15-29             | 296                  | 305                  | 288                  | 294                  |
| 30-44             | 213                  | 205                  | 222                  | 214                  |
| 45-59             | 131                  | 124                  | 129                  | 120                  |
| 60 & above        | 62                   | 63                   | 71                   | 75                   |
| <b>all ages</b>   | <b>1000</b>          | <b>1000</b>          | <b>1000</b>          | <b>1000</b>          |

Note: Survey period, NSS 58<sup>th</sup> round: July to December, 2002

3.3.1 *Level of Morbidity*: Statement 9 gives the survey estimates on prevalence of morbidity. For the purpose of the survey, it is termed Proportion of Ailing Persons (PAP), measured as the number of persons reporting ailment during a 15-day period per 1000 persons for some broad age-groups. It shows a difference of 1 percentage point in the PAP between the rural and urban areas. The rate differed between the male and female population by 1 percentage point in rural India and 2 percentage points in urban India. As expected, the PAPs are found to be higher for children and much higher for the higher age groups – the lowest being the PAPs for the youth (age 15-29 years). While 12 to 15 per cent of persons in the age-bracket 45-59 reported ailments, the proportion was as high as 28 and 37 per cent for the aged persons (age 60 years or more) in rural and urban areas, respectively. The rural-urban differentials are also significant among the aged. The estimates for different broad age groups are also shown in Figure 1.

## Statement 9

Number (per 1000) of persons reporting ailment (PAP) during last 15 days

India

| broad age-groups | rural     |           |           | urban     |            |           | rural + urban |           |           |
|------------------|-----------|-----------|-----------|-----------|------------|-----------|---------------|-----------|-----------|
|                  | male      | female    | all       | male      | female     | all       | male          | female    | all       |
| 0-14             | 76        | 68        | 72        | 84        | 74         | 79        | 78            | 69        | 74        |
| 15-29            | 41        | 57        | 49        | 44        | 56         | 50        | 42            | 56        | 49        |
| 30-44            | 64        | 93        | 78        | 64        | 95         | 79        | 64            | 93        | 78        |
| 45-59            | 107       | 132       | 119       | 127       | 173        | 149       | 113           | 143       | 128       |
| 60 & above       | 285       | 282       | 283       | 352       | 383        | 368       | 301           | 307       | 304       |
| <b>all</b>       | <b>83</b> | <b>93</b> | <b>88</b> | <b>91</b> | <b>108</b> | <b>99</b> | <b>85</b>     | <b>97</b> | <b>91</b> |
|                  | (54)      | (57)      | (55)      | (51)      | (58)       | (54)      | (53)          | (57)      | (55)      |

Figures in brackets give the corresponding estimates from NSS 52<sup>nd</sup> Round (1995-96)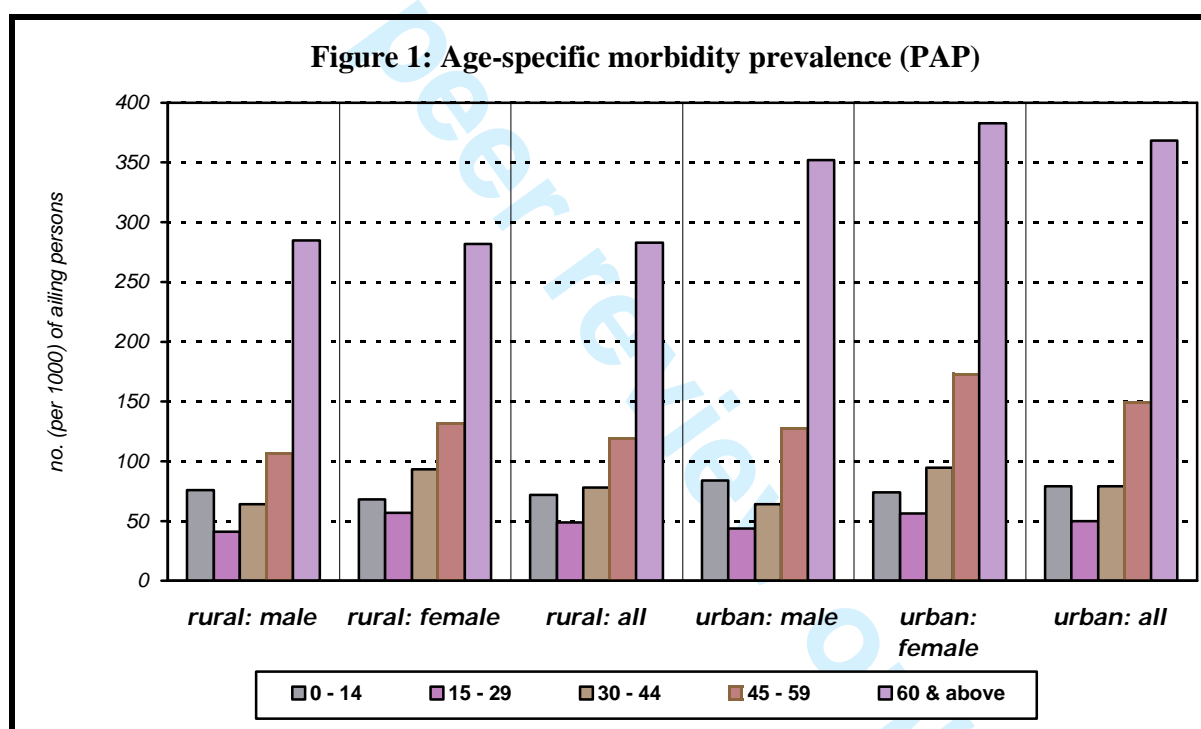

3.3.1.1 The morbidity rate (PAP) presented in Statement 9 gives the estimated proportion of persons reporting ailment suffered at any time during the reference period and are not strictly the *prevalence rates* as recommended by the Expert Committee on Health Statistics of the WHO. The WHO defines *prevalence rate* as the ratio between the number of spells of ailment suffered at any time during the reference period and the population exposed to the risk. It measures the *frequency of illnesses* prevailing during the reference period, whereas Statement 9 gives the *number of persons reporting ailments* during a 15-day period per 1000 persons.

3.3.1.2 As the estimates are based on self-reported morbidity data, rather than on medical examination, the information on number spells of different ailments suffered during the reference period is not likely to reflect the objective illness-status of the patients, particularly the number of



diseases a patient is afflicted with. Thus, only the estimated proportion (number per 1000) of ailing persons is used as a measure of morbidity rates in this report. The comparison of the survey estimates of morbidity rates, with those of the previous NSS round (52<sup>nd</sup> round: July 1995 – June 1996) shows that the PAP has increased by 3 and 4 percentage points in the rural and urban areas, respectively. The increase in PAP over time is probably due to increased health consciousness over time and consequently, improvement in the self-reporting of ailments by the informants. The PAPs for the major states are given in Figure 2.

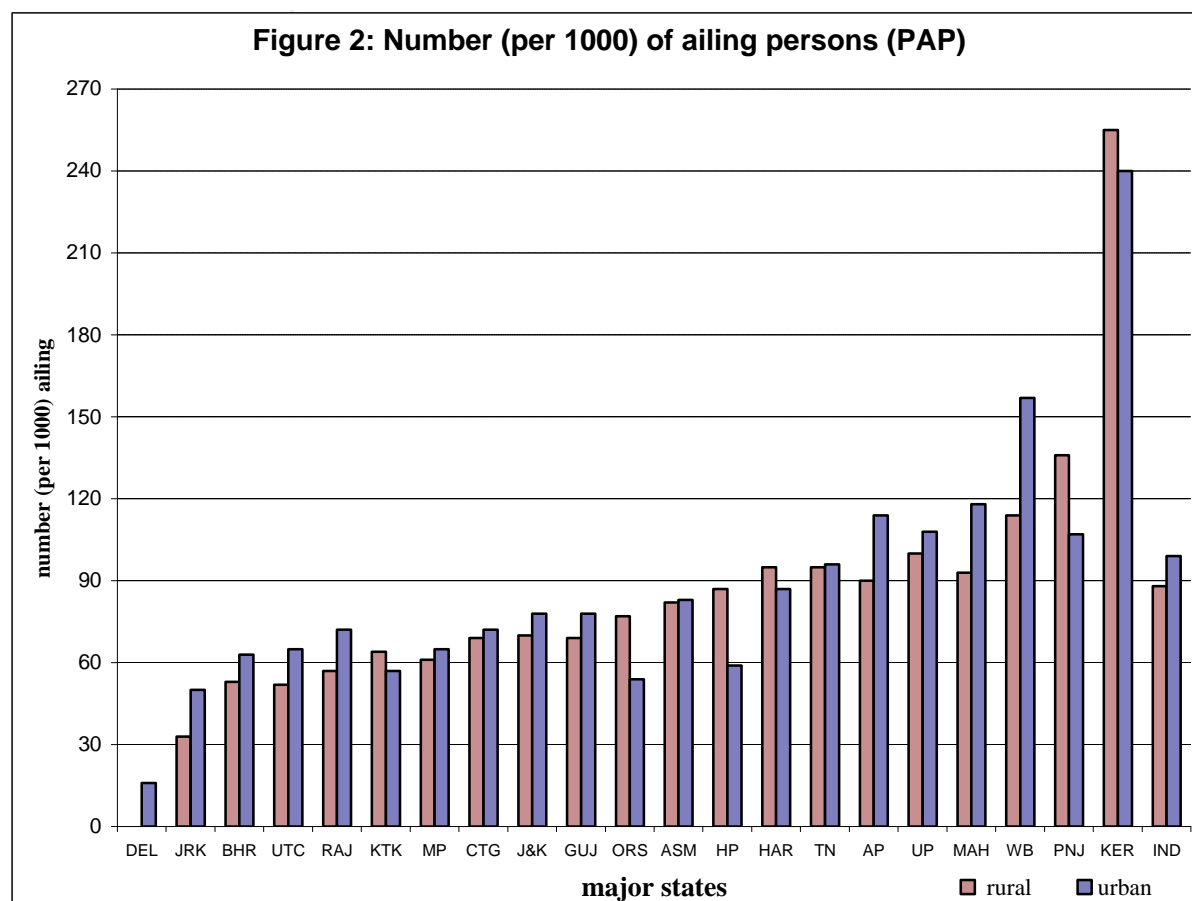

3.3.1.3 *PAP and Level of Living*: Statement 10 shows the relationship between morbidity reporting and level of living, measured by per capita monthly consumption expenditure (MPCE). The data on household consumption expenditure were collected through a much smaller set of questions in comparison with the elaborate schedule of enquiry generally used in NSSO for collecting consumption data (see para 3.2.2.1). It reveals a broad positive association between MPCE and PAP, in both rural and urban areas. The range of variation in PAP was larger in the rural areas than in the urban areas. If MPCE is considered to be a proxy for level of living of the households, the data appear to show that the level of morbidity tends to rise with the level of living. This may mean either that the poor are less prone to sickness than the rich, or that the reporting of morbidity improves with improvement in the level of living. Of the two hypotheses, the second seems to be the more plausible.

## Statement 10

PAP\* during last 15 days for each household monthly per capita expenditure class (Rs.)

| India                |     |                      |     |
|----------------------|-----|----------------------|-----|
| rural                |     | urban                |     |
| MPCE class           | PAP | MPCE class           | PAP |
| <i>less than 225</i> | 64  | <i>less than 300</i> | 65  |
| 225 – 255            | 56  | 300 – 350            | 89  |
| 255 – 300            | 64  | 350 – 425            | 83  |
| 300 – 340            | 66  | 425 – 500            | 83  |
| 340 – 380            | 77  | 500 – 575            | 85  |
| 380 – 420            | 80  | 575 – 665            | 85  |
| 420 – 470            | 86  | 665 – 775            | 101 |
| 470 – 525            | 93  | 775 – 915            | 93  |
| 525 – 615            | 94  | 915 – 1120           | 100 |
| 615 – 775            | 112 | 1120 – 1500          | 118 |
| 775 – 950            | 137 | 1500 – 1925          | 115 |
| 950 & above          | 165 | 1925 & above         | 149 |
| <i>all</i>           | 88  | <i>all</i>           | 99  |

\*number per 1000 of ailing persons

type of ailment (disease) as reported by the ailing member. In the 60<sup>th</sup> round, this distinction among the ailments (diseases) based on the report of the ailing member was not adopted since the duration of an ailment may not be reported correctly by the respondent and any classification based on this reporting may not be adequate and proper.

3.3.2 *Commencement of Ailment*: Statement 12 gives the age and gender-specific proportions (number per 1000) of persons reporting commencement

## Statement 12

Number (per 1000) of persons reporting commencement of any ailment (PPC) during last 15 days

| India           |       |        |      |       |        |      |             |        |      |
|-----------------|-------|--------|------|-------|--------|------|-------------|--------|------|
| broad age-group | rural |        |      | urban |        |      | rural+urban |        |      |
|                 | male  | female | all  | male  | female | all  | male        | female | all  |
| 0-14            | 57    | 51     | 54   | 63    | 54     | 59   | 58          | 52     | 55   |
| 15-29           | 25    | 33     | 29   | 29    | 36     | 32   | 26          | 34     | 30   |
| 30-44           | 31    | 44     | 37   | 35    | 41     | 38   | 32          | 43     | 38   |
| 45-59           | 40    | 52     | 46   | 30    | 52     | 40   | 38          | 52     | 45   |
| 60 & above      | 65    | 70     | 68   | 48    | 61     | 55   | 61          | 68     | 64   |
| all             | 43    | 46     | 45   | 41    | 46     | 44   | 42          | 46     | 44   |
|                 | (30)  | (32)   | (31) | (30)  | (31)   | (30) | (30)        | (32)   | (31) |

Note: PPCs for 52<sup>nd</sup> round are in parentheses;

3.3.1.4 *PAP and Social Groups of Households*: The PAPs in households belonging to different social groups can be an interesting object of study. The estimates are given in Statement 11. It may be seen from the statement that the estimates of PAP are found to be lowest among the STs followed by SCs, and is highest among the others category of persons in both rural and urban areas. It may be mentioned that in the 52<sup>nd</sup> round survey, the ailments were classified by their duration viz., short-duration or long-duration, determined on the basis of the

## Statement 11

PAP during last 15 days for each household social group

| India                   |       |       |               |
|-------------------------|-------|-------|---------------|
| household social groups | rural | urban | rural + urban |
| ST                      | 58    | 61    | 58            |
| SC                      | 88    | 86    | 88            |
| OBC                     | 87    | 91    | 88            |
| Others                  | 102   | 113   | 106           |
| all                     | 88    | 99    | 91            |

(PPC) of any ailment during the reference period of 15 days preceding the date of survey, separately for rural and urban areas. It may be noted that the PPC is also different from the incidence rate, as defined in the recommendations of the Expert Commission on Health Statistics of the WHO (see para 3.3.1.1). While the incidence rate measures the frequency



of illnesses commencing during a reference period, the PPC gives the estimated proportion of persons reporting commencement of any ailment. Like the PAPs, the PPCs do not reflect any perceptible rural-urban difference. The observed almost equal levels of morbidity reporting in the rural and urban areas is, apparently, contrary to the poorer health conditions in the rural areas reflected by health indicators like infant mortality rate and mortality rate at other ages, expectation of life at birth, etc.

3.3.2.1 There is a well-established direct association between morbidity reporting and level of health consciousness. In an attempt to understand how health consciousness influences morbidity reporting, Infant Mortality Rates (IMRs) estimated through the Sample Registration Scheme of the Office of the Registrar-General of India are also provided alongside PAPs and PPCs for the

Statement 13

Number (per 1000) of persons reporting ailment (PAP) and number reporting commencement of any ailment (PPC) during last 15 days, along with mortality rate (IMR) for major states

| major state      | rural |      |      | urban |      |      |
|------------------|-------|------|------|-------|------|------|
|                  | PAP   | PPC  | IMR  | PAP   | PPC  | IMR  |
| Andhra Pradesh   | 90    | 36   | 71   | 114   | 47   | 35   |
| Assam            | 82    | 58   | 73   | 83    | 48   | 38   |
| Bihar            | 53    | 32   | 62   | 63    | 30   | 50   |
| Chhattisgarh     | 69    | 38   | -    | 72    | 31   | -    |
| Delhi            | @     | @    | @    | 16    | 7    | -    |
| Gujarat          | 69    | 29   | 68   | 78    | 29   | 37   |
| Haryana          | 95    | 48   | 65   | 87    | 43   | 51   |
| Himachal Pradesh | 87    | 26   | -    | 59    | 19   | -    |
| Jammu & Kashmir  | 70    | 30   | -    | 78    | 34   | -    |
| Jharkhand        | 33    | 21   | -    | 50    | 21   | -    |
| Karnataka        | 64    | 32   | 65   | 57    | 20   | 25   |
| Kerala           | 255   | 103  | 11   | 240   | 100  | 8    |
| Madhya Pradesh   | 61    | 32   | 90   | 65    | 36   | 56   |
| Maharashtra      | 93    | 44   | 52   | 118   | 50   | 34   |
| Orissa           | 77    | 49   | 91   | 54    | 30   | 56   |
| Punjab           | 136   | 61   | 55   | 107   | 44   | 35   |
| Rajasthan        | 57    | 23   | 81   | 72    | 27   | 55   |
| Tamil Nadu       | 95    | 54   | 50   | 96    | 49   | 32   |
| Uttaranchal      | 52    | 31   | -    | 65    | 25   | -    |
| Uttar Pradesh    | 100   | 55   | 83   | 108   | 55   | 58   |
| West Bengal      | 114   | 56   | 52   | 157   | 62   | 36   |
| India            | 88    | 45   | 69*  | 99    | 44   | 40*  |
|                  | (55)  | (31) | (79) | (54)  | (30) | (47) |

@ 'Not presented'. Note: '-' indicates that figures are not available.

\* Excludes Nagaland

1. The data on Infant Mortality Rate (IMR) are estimates for 2002 obtained by the Sample Registration Scheme of the Registrar-General of India. India.

2. IMR values in brackets are averages of IMRs estimated for 1995 and 1996 by the Sample Registration Scheme of the Registrar-General of India. Other figures in brackets are NSS (52<sup>nd</sup> round) estimates for 1995-96.

major states in Statement 13. IMR is a widely accepted indicator of general health of a population and health care services available to it. Moreover, the better the health care services, the higher is the level of health consciousness expected to be. Thus, IMR has been taken as a broad indicator of health consciousness. Interestingly, while the IMRs and PAPs for Kerala, Punjab, West Bengal and many other states suggest an expected negative relationship between infant mortality and morbidity reporting, the data on rural areas of Orissa, Rajasthan and Madhya Pradesh seem to point to the contrary. The statement also reveals similar features for urban PAP as well as PPC of the rural and urban areas.

3.3.2.2 Statement 13 also reveals wide inter-state variations in PAP as well as PPC in both rural and urban areas. The level of morbidity in the rural areas of the major states (other than Delhi for which the sample size is too small), measured in terms of PAP, varied from 33 in Jharkhand to 255 in Kerala. The variation in PPC, on the other hand, ranged from 21 in Jharkhand to 103 in Kerala. Comparatively, inter-state variation in morbidity reporting in the urban areas was less pronounced, with PAP ranging from 50 in Jharkhand to 240 in Kerala. It is, however, seen that the states with relatively high morbidity reporting in the rural areas also reported high morbidity in the urban areas. In fact, in both rural and urban areas, the states of Kerala, Punjab, West Bengal and Andhra Pradesh were at one extreme reporting high levels of morbidity, while at the other extreme were Jharkhand, Uttaranchal, Bihar and Rajasthan with low levels of morbidity reporting. It may be noted that Kerala besides having the lowest infant mortality rate, was also far ahead of other states in achievements in the field of health care, as reflected by other indicators like birth rate, proportion of institutional births, life expectancy, etc. But since the state had a high proportion of aged people (60 years and above) with, as one might expect, high levels of morbidity, the overall morbidity levels of this state tend to be higher than those of other states. The proportion of the aged in Kerala (11.2 per cent) is found by the current survey to be much higher than that of the country as a whole (6.9 per cent).

### 3.4 Treatment of Ailments

3.4.1 *Proportion of Ailing Persons Treated:* Persons who are ailing do not always get their ailments medically treated and sometimes resort to self-medication, home remedies or no medical care. Statement 14 gives the percentage of ailments treated. While for the present round (Jan-June 2004), the estimates relate to the spells of ailments treated, the estimates obtained from the 52<sup>nd</sup> (1995-96) and the 42<sup>nd</sup> (1986-87) round surveys relate to the proportion of ailing persons medically treated. These two sets of estimates are almost comparable since the average number of spells per ailing person, for all the categories of persons considered in the Statement, has been found to be around 1. In all the surveys, the percentage of ailing persons who got their ailments treated is found to be higher

Statement 14

Percentage spells of ailments treated during last 15 days

|              |                              | India                            |                                  |  |
|--------------|------------------------------|----------------------------------|----------------------------------|--|
| gender       | 2004<br>60 <sup>th</sup> rd. | 1995-96<br>52 <sup>nd</sup> rd*. | 1986-87<br>42 <sup>nd</sup> rd*. |  |
| <b>rural</b> |                              |                                  |                                  |  |
| male         | 82<br>(1.0)                  | 84                               | 83                               |  |
| female       | 82<br>(1.0)                  | 82                               | 80                               |  |
| person       | 82<br>(1.0)                  | 83                               | 82                               |  |
| <b>urban</b> |                              |                                  |                                  |  |
| male         | 90<br>(1.1)                  | 91                               | 90                               |  |
| female       | 89<br>(1.1)                  | 90                               | 88                               |  |
| person       | 89<br>(1.1)                  | 91                               | 89                               |  |

Figures in brackets give average number of spells of ailment per ailing persons

\* % of ailing persons treated for 52<sup>nd</sup> and 42<sup>nd</sup> rounds.

**Statement 15**

Number per 1000 of spells of ailments treated during 15 days by MPCE class

| India                |                |                      |                |
|----------------------|----------------|----------------------|----------------|
| rural                |                | urban                |                |
| MPCE class           | treated spells | MPCE class           | treated spells |
| <i>less than 225</i> | 759            | <i>less than 300</i> | 782            |
| 225 – 255            | 779            | 300 – 350            | 875            |
| 255 – 300            | 777            | 350 – 425            | 847            |
| 300 – 340            | 756            | 425 – 500            | 853            |
| 340 – 380            | 796            | 500 – 575            | 896            |
| 380 – 420            | 806            | 575 – 665            | 863            |
| 420 – 470            | 820            | 665 – 775            | 905            |
| 470 – 525            | 815            | 775 – 915            | 911            |
| 525 – 615            | 829            | 915 – 1120           | 901            |
| 615 – 775            | 869            | 1120 – 1500          | 896            |
| 775 – 950            | 878            | 1500 – 1925          | 888            |
| 950 & above          | 894            | 1925 & above         | 945            |
| all                  | 823            | all                  | 892            |

in the urban areas than in the rural areas. The reported rates of treatment of the sick do not indicate any perceptible gender bias in either of the surveys. Moreover, the results of the three rounds do not reveal any detectable change over time in the percentage of ailing persons treated.

**3.4.2 Spells of Ailments Treated and MPCE:** Statement 15 reveals the relationship between the percentage of treated spells of ailments and monthly per capita consumption expenditure (MPCE) separately for the rural and urban areas. The proportion varied between 76 to 89 per cent in the rural areas and 78 to 95 per cent in the urban areas over the different expenditure classes, the proportion increasing gradually

with the level of expenditure or levels of living. The overall difference between the rural and urban areas was about 7 percentage points – more spells of ailments being treated in the urban areas.

**3.4.3 Untreated Spells of Ailment:** Untreated spells of ailments, whose proportion can be derived

from Statement 13, are further distributed in Statement 16 by reason for not taking treatment. The corresponding estimates for NSS 52<sup>nd</sup> round are also presented in the statement. It is seen that, in the current round of survey as well as in the previous survey, the reason most often cited for no treatment was that the ailment was 'not serious'. This reason was reported by 32 per cent and 50 per cent of the cases of untreated ailments in the rural and urban areas, respectively. In the 52<sup>nd</sup> round, this reason accounted for about 50 to 60 per cent of the cases of untreated ailment. The proportion is found to have come down considerably in the rural areas since 1995-96, pointing to an increase in health consciousness among rural households. The 'financial problem' was next in importance as a reason for no treatment, accounting for 28 per cent and 20 per cent of the untreated ailments in the rural and urban areas, respectively.

**Statement 16**

Percentage distribution of untreated spells of ailments by reason for no treatment

| reason for no treatment        | India                       |                               |                             |                               |
|--------------------------------|-----------------------------|-------------------------------|-----------------------------|-------------------------------|
|                                | rural                       |                               | Urban                       |                               |
|                                | 2004<br>60 <sup>th</sup> rd | '95-96<br>52 <sup>nd</sup> rd | 2004<br>60 <sup>th</sup> rd | '95-96<br>52 <sup>nd</sup> rd |
| no medical facility            | 12                          | 9                             | 1                           | 1                             |
| <i>facility available but:</i> |                             |                               |                             |                               |
| lack of faith                  | 3                           | 4                             | 2                           | 5                             |
| long waiting                   | 1                           | 1                             | 2                           | 1                             |
| financial problem              | 28                          | 24                            | 20                          | 21                            |
| ailment not considered serious | 32                          | 52                            | 50                          | 60                            |
| Others (incl. n. r.)           | 24                          | 10                            | 25                          | 12                            |
| all (incl. n.r. cases)         | 100                         | 100                           | 100                         | 100                           |

Note: For the 52<sup>nd</sup> round, estimates relate to untreated persons

## Statement 17

Per 1000 distribution of treated spells of ailments during 15 days by source of treatment (institution) for each MPCE class

India

| MPCE class (Rs.)     | rural                            |             | MPCE class (Rs.)     | urban                            |             |
|----------------------|----------------------------------|-------------|----------------------|----------------------------------|-------------|
|                      | per 1000 no. of ailments treated |             |                      | per 1000 no. of ailments treated |             |
|                      | Govt. insti.                     | Pvt. insti. |                      | Govt. insti.                     | Pvt. insti. |
| <i>less than 225</i> | 296                              | 704         | <i>less than 300</i> | 260                              | 740         |
| 225 – 255            | 262                              | 738         | 300 – 350            | 214                              | 786         |
| 255 – 300            | 257                              | 743         | 350 – 425            | 255                              | 745         |
| 300 – 340            | 262                              | 738         | 425 – 500            | 253                              | 747         |
| 340 – 380            | 214                              | 786         | 500 – 575            | 230                              | 770         |
| 380 – 420            | 220                              | 780         | 575 – 665            | 261                              | 739         |
| 420 – 470            | 222                              | 778         | 665 – 775            | 171                              | 829         |
| 470 – 525            | 202                              | 798         | 775 – 915            | 215                              | 785         |
| 525 – 615            | 227                              | 773         | 915 – 1120           | 190                              | 810         |
| 615 – 775            | 214                              | 786         | 1120 – 1500          | 156                              | 844         |
| 775 – 950            | 230                              | 770         | 1500 – 1925          | 171                              | 829         |
| 950 & above          | 179                              | 821         | 1925 & above         | 109                              | 891         |
| all                  | 224                              | 776         | all                  | 192                              | 808         |

sources - 78 per cent in the rural areas and 81 per cent in the urban areas, while the overall proportion of treated (spells of) ailments to all ailments was 82 per cent in the rural and 89 per cent in the urban areas (see Statement 15).

By and large, the statement also shows a progressive, if gradual, decline with rise in level of living in the reliance on public sector institutions as measured by proportion of ailments treated in such institutions. For the people in the lowest MPCE class (less than Rs. 225) in the rural areas, treatment was received from the government institutions in about 30 per cent of the treated cases, whereas the proportion was 18 per cent for highest MPCE class (Rs. 950 & above). In the urban areas, the corresponding proportions were 26 per cent and 11 per cent. The share of the public provider in treatment of ailments is given in Statement 18 for the different household social groups. The statement shows more reliance on the public provider among the households belonging to the scheduled categories, both in the rural and in the urban areas. While for the people belonging to the *ST* and *SC* categories, treatment was from the Government institutions in about 24 to 33 per cent of the treated cases of ailments, the proportion was about 17 to 20 per

3.4.4 *Share of Public Provider in Treatment of Illnesses*: The public providers for health care include government hospitals, government clinics, government dispensaries, Primary Health Centres (PHCs) and the Community Health Centres (CHCs), and the state and central government assisted ESI hospitals and dispensaries. The rest of the providers fall in the category of 'private' sources. The 'private' sources include private doctors, nursing homes, private hospitals, charitable institutions, etc. Statement 17 shows how the share of public provider in treatment of ailments varies with expenditure class. It reveals that a large proportion of total ailments were treated from the private

## Statement 18

Proportion (per 1000) of spells of ailments treated during 15 days and per 1000 distribution of treated spells of ailments by source of treatment (institution) for each household social group

India

| hhd. social group | rural                            |                     |             | urban                            |                     |             |
|-------------------|----------------------------------|---------------------|-------------|----------------------------------|---------------------|-------------|
|                   | number (per 1000) treated spells | source of treatment |             | number (per 1000) treated spells | source of treatment |             |
|                   |                                  | Govt. instn.        | Pvt. instn. |                                  | Govt. instn.        | Pvt. instn. |
| ST                | 767                              | 325                 | 675         | 878                              | 301                 | 699         |
| SC                | 798                              | 262                 | 738         | 867                              | 240                 | 760         |
| OBC               | 830                              | 205                 | 795         | 890                              | 204                 | 796         |
| Others            | 842                              | 204                 | 796         | 902                              | 170                 | 830         |
| all               | 823                              | 224                 | 776         | 892                              | 192                 | 808         |

cent for the people belonging to the *others* categories. The share of public provider in non-hospitalised treatment of ailments is also shown in Figure 3.

Figure 3: Share of public provider in non-hospitalised medical treatment of ailments– all-India

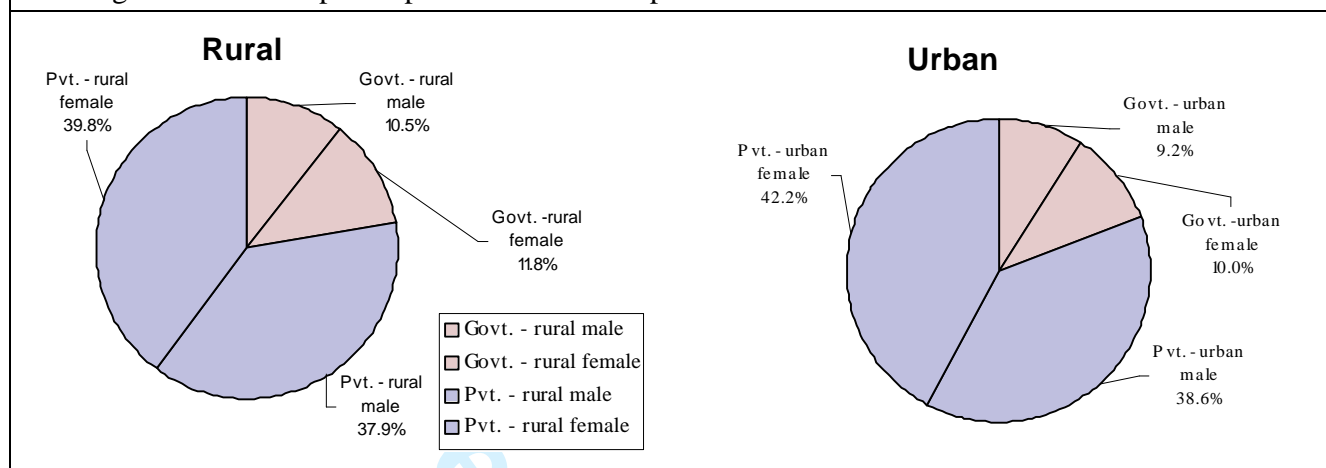

Statement 19

Percentage of spells of ailments treated (non-institutional) during 15 days and percentage distribution of treated spells of ailments by source of treatment in major states

| major state      | rural                        |                         |      | urban                        |                         |      |
|------------------|------------------------------|-------------------------|------|------------------------------|-------------------------|------|
|                  | % spells of ailments treated | source of treatment (%) |      | % spells of ailments treated | source of treatment (%) |      |
|                  |                              | Govt.                   | Pvt. |                              | Govt.                   | Pvt. |
| Andhra Pradesh   | 77                           | 21                      | 79   | 88                           | 20                      | 80   |
| Assam            | 79                           | 27                      | 73   | 94                           | 24                      | 76   |
| Bihar            | 81                           | 5                       | 95   | 88                           | 11                      | 89   |
| Chattisgarh      | 89                           | 15                      | 85   | 90                           | 20                      | 80   |
| Delhi            | @                            | @                       | @    | 95                           | 23                      | 77   |
| Gujarat          | 84                           | 21                      | 79   | 93                           | 18                      | 82   |
| Haryana          | 94                           | 12                      | 88   | 95                           | 20                      | 80   |
| Himachal Pradesh | 94                           | 68                      | 32   | 92                           | 86                      | 14   |
| Jammu & Kashmir  | 82                           | 52                      | 48   | 94                           | 51                      | 49   |
| Jharkhand        | 92                           | 13                      | 87   | 96                           | 24                      | 76   |
| Karnataka        | 78                           | 34                      | 66   | 87                           | 16                      | 84   |
| Kerala           | 87                           | 37                      | 63   | 90                           | 22                      | 78   |
| Madhya Pradesh   | 87                           | 23                      | 77   | 95                           | 23                      | 77   |
| Maharashtra      | 88                           | 16                      | 84   | 92                           | 11                      | 89   |
| Orissa           | 76                           | 51                      | 49   | 86                           | 54                      | 46   |
| Punjab           | 94                           | 16                      | 84   | 96                           | 18                      | 82   |
| Rajasthan        | 90                           | 44                      | 56   | 90                           | 53                      | 47   |
| Tamil Nadu       | 78                           | 29                      | 71   | 87                           | 22                      | 78   |
| Uttaranchal      | 89                           | 18                      | 82   | 98                           | 35                      | 65   |
| Uttar Pradesh    | 77                           | 10                      | 90   | 88                           | 13                      | 87   |
| West Bengal      | 80                           | 19                      | 81   | 83                           | 20                      | 80   |
| India            | 82                           | 22                      | 78   | 89                           | 19                      | 81   |

@ not presented

3.4.5 *Inter-state Variation in Proportion of Ailments Treated by Government Sources:* Statement 19 reveals wide inter-state variation in the percentage of ailments treated as well as in the percentage of ailments treated from government sources. Relatively high percentage of treated ailments was reported in the rural areas of Punjab, Haryana, Himachal Pradesh and Jharkhand, and in the urban areas of Uttaranchal, Jharkhand, Punjab, Madhya Pradesh, Haryana, Delhi, Assam and Jammu & Kashmir. But, even among these states, the utilisation of government sources for treatment of ailments varied considerably. While use of public health care facilities for treatment of ailment was lowest in the rural areas of Bihar (5 per cent), preceded by Uttar Pradesh,



## Statement 20

Percentage of treated ailments receiving non-hospitalised treatment from government sources

| major state      | rural               |                     |                     | urban               |                     |                     |
|------------------|---------------------|---------------------|---------------------|---------------------|---------------------|---------------------|
|                  | 2004                | 1995-96             | 1986-87             | 2004                | 1995-96             | 1986-87             |
|                  | 60 <sup>th</sup> Rd | 52 <sup>nd</sup> Rd | 42 <sup>nd</sup> Rd | 60 <sup>th</sup> Rd | 52 <sup>nd</sup> Rd | 42 <sup>nd</sup> Rd |
| Andhra Pradesh   | 21                  | 22                  | 12                  | 20                  | 19                  | 16                  |
| Assam            | 27                  | 29                  | 40                  | 24                  | 22                  | 26                  |
| Bihar            | 5                   | 13                  | 14                  | 11                  | 33                  | 17                  |
| Chattisgarh      | 15                  | *                   | *                   | 20                  | *                   | *                   |
| Delhi            | @                   | *                   | *                   | 23                  | *                   | *                   |
| Gujarat          | 21                  | 25                  | 28                  | 18                  | 22                  | 18                  |
| Haryana          | 12                  | 13                  | 15                  | 20                  | 11                  | 19                  |
| Himachal Pradesh | 68                  | *                   | *                   | 86                  | *                   | *                   |
| Jammu & Kashmir  | 52                  | *                   | *                   | 51                  | *                   | *                   |
| Jharkhand        | 13                  | *                   | *                   | 24                  | *                   | *                   |
| Karnataka        | 34                  | 26                  | 32                  | 16                  | 17                  | 30                  |
| Kerala           | 37                  | 28                  | 32                  | 22                  | 28                  | 33                  |
| Madhya Pradesh   | 23                  | 23                  | 24                  | 23                  | 19                  | 28                  |
| Maharashtra      | 16                  | 16                  | 21                  | 11                  | 17                  | 15                  |
| Orissa           | 51                  | 38                  | 37                  | 54                  | 34                  | 43                  |
| Punjab           | 16                  | 7                   | 12                  | 18                  | 6                   | 11                  |
| Rajasthan        | 44                  | 36                  | 46                  | 53                  | 41                  | 52                  |
| Tamil Nadu       | 29                  | 25                  | 28                  | 22                  | 28                  | 31                  |
| Uttaranchal      | 18                  | *                   | *                   | 35                  | *                   | *                   |
| Uttar Pradesh    | 10                  | 8                   | *                   | 13                  | 9                   | 14                  |
| West Bengal      | 19                  | 15                  | 16                  | 20                  | 19                  | 20                  |
| India            | 22                  | 19                  | 21                  | 19                  | 20                  | 24                  |

Note: 1. The estimates of the 52nd round are based only on the treatments with reported source of treatment.

2. \* denotes estimate not available and @ denotes estimate not presented.

Jharkhand, Maharashtra, Punjab, Uttaranchal and West Bengal, it was highest in Himachal Pradesh (68 per cent), followed by Jammu & Kashmir, Orissa and Rajasthan. In the urban areas, although the proportion of treated cases of ailments was, in general, higher than in the rural, the reliance on the government health institutions was less than in the rural areas. This is perhaps, to some extent, due to easy availability of and accessibility to the private health institutions in urban. The percentage of ailments treated by government sources was reported to be as low as 11 per cent in the urban areas of Bihar and Maharashtra, preceded by Uttar Pradesh (13 per cent), Karnataka (16 per cent), Gujarat, Punjab (18 per cent each) and. West Bengal (20 per cent).

### 3.4.6 Changing Role of Public Institutions: Statement 20 shows the changes in the share of

government institutions in the case of non-hospitalised treatment of ailments for different states over the periods. It can be seen that there has been a marginal change in the share at the all-India level in both rural and urban areas. While some increase is seen in the utilisation of government institutions in the rural areas, the reverse is the case in the urban areas. States showing an increase in this share were Orissa, Kerala, Karnataka and Rajasthan in respect of rural areas, and Orissa, Punjab and Rajasthan in respect of urban areas. While Bihar and Gujarat showed a decline in the share of public institutions in treatment of non-hospitalised ailments in both rural and urban areas, a significant decline in the share of public institutions in treating ailments can be seen in the urban areas of Kerala, Maharashtra and Tamil Nadu.

## 3.5 Hospitalised Treatment of Ailments

**3.5.1 Proportion of Persons Hospitalised:** Medical treatment of an ailing person as an inpatient in any medical institution having provision for treating the sick as inpatients is considered as hospitalised treatment. Statement 21 gives the estimates of number (per 1000) of persons hospitalised during a reference period of 365 days. It may be noted that the average number of

cases of hospitalisation per hospitalised person was around 1.1 in both the rural and the urban areas. It is seen that the estimated proportion of hospitalised persons differed substantially between the rural and the urban areas. About 3.1 per cent of the urban population were hospitalised at some time during a reference period of 365 days. The proportion of persons hospitalised in the rural areas was much lower (2.3 per cent). The survey results, however, do not reflect any systematic gender differential in this respect, either in the rural or in the urban areas. The rate increases with the age of a person and is the highest for the aged (60+) persons, both in rural and urban areas. Among the aged, the gender differential is more pronounced in the urban than the rural areas. The corresponding estimates for the states are given in Statement 21.1 (p. 39).

**3.5.2 Hospitalised Cases and Level of Living:** Statement 22 reveals the relationship between the number (per 1000) of persons hospitalised during the 365 days preceding the date of survey and average monthly per capita consumption expenditure (MPCE), separately for male and female populations of the rural and urban areas of the country as a whole. Considering MPCE as a proxy for level of living, the estimates suggest a positive association between level of living and the rate of hospitalisation in both rural and urban areas, except for the highest two MPCE classes. The rise in the rate is steeper for the rural than for the urban areas. Though the behaviour for the last two MPCE classes

**Statement 21**

Number (per 1000) of persons hospitalised during a reference period of 365 days

|                          |      |        |          | India |  |  |
|--------------------------|------|--------|----------|-------|--|--|
| age-group                | male | female | person   |       |  |  |
| <b>rural</b>             |      |        |          |       |  |  |
| 0-14                     | 15   | 10     | 12       |       |  |  |
| 15-29                    | 17   | 21     | 19       |       |  |  |
| 30-44                    | 23   | 27     | 25       |       |  |  |
| 45-59                    | 41   | 37     | 39       |       |  |  |
| 60 & above               | 63   | 49     | 56       |       |  |  |
| all                      | 23   | 22     | 23 (1.1) |       |  |  |
| NSS 52 <sup>nd</sup> Rd. | 14   | 13     | 13 (1.1) |       |  |  |
| <b>urban</b>             |      |        |          |       |  |  |
| 0-14                     | 22   | 17     | 20       |       |  |  |
| 15-29                    | 18   | 26     | 21       |       |  |  |
| 30-44                    | 28   | 31     | 29       |       |  |  |
| 45-59                    | 51   | 45     | 48       |       |  |  |
| 60 & above               | 102  | 81     | 91       |       |  |  |
| all ages                 | 31   | 31     | 31 (1.1) |       |  |  |
| NSS 52 <sup>nd</sup> Rd. | 20   | 20     | 20 (1.1) |       |  |  |
| <b>rural +urban</b>      |      |        |          |       |  |  |
| 0-14                     | 16   | 11     | 14       |       |  |  |
| 15-29                    | 17   | 22     | 20       |       |  |  |
| 30-44                    | 25   | 28     | 26       |       |  |  |
| 45-59                    | 44   | 39     | 41       |       |  |  |
| 60 & above               | 72   | 57     | 64       |       |  |  |
| all ages                 | 25   | 24     | 25 (1.1) |       |  |  |
| NSS 52 <sup>nd</sup> Rd. | 16   | 15     | 15 (1.1) |       |  |  |

Note: Figures in parentheses give the average number of cases of hospitalisation per hospitalised person

**Statement 22**

Number per 1000 of hospitalised cases of treatment by household MPCE class

|               |      |        |        |               |      |        |        | India |  |  |
|---------------|------|--------|--------|---------------|------|--------|--------|-------|--|--|
| rural         |      |        |        | urban         |      |        |        |       |  |  |
| MPCE class    | male | female | person | MPCE class    | male | female | person |       |  |  |
| less than 225 | 31   | 33     | 32     | less than 300 | 28   | 22     | 25     |       |  |  |
| 225 – 255     | 21   | 29     | 25     | 300 – 350     | 17   | 19     | 18     |       |  |  |
| 255 – 300     | 57   | 54     | 56     | 350 – 425     | 50   | 51     | 50     |       |  |  |
| 300 – 340     | 64   | 59     | 62     | 425 – 500     | 101  | 95     | 98     |       |  |  |
| 340 – 380     | 74   | 71     | 72     | 500 – 575     | 49   | 52     | 50     |       |  |  |
| 380 – 420     | 97   | 87     | 92     | 575 – 665     | 88   | 104    | 95     |       |  |  |
| 420 – 470     | 86   | 94     | 90     | 665 – 775     | 131  | 109    | 121    |       |  |  |
| 470 – 525     | 106  | 117    | 111    | 775 – 915     | 111  | 117    | 114    |       |  |  |
| 525 – 615     | 124  | 117    | 121    | 915 – 1120    | 121  | 139    | 130    |       |  |  |
| 615 – 775     | 151  | 145    | 148    | 1120 – 1500   | 168  | 143    | 156    |       |  |  |
| 775 – 950     | 72   | 80     | 76     | 1500 – 1925   | 53   | 51     | 52     |       |  |  |
| 950 & above   | 116  | 113    | 115    | 1925 & above  | 84   | 99     | 91     |       |  |  |
| all           | 1000 | 1000   | 1000   | all           | 1000 | 1000   | 1000   |       |  |  |

cannot be explained fully, it seems that cases of hospitalisation were more common - 9 to 16 per cent - among the middle and upper middle classes of levels of living.

**3.5.3 Proportion of Persons Hospitalised - Inter-state Variation:** Statement 21.2 gives the estimated proportion (per 1000)



Statement 21.2  
Proportion (per 1000) of persons hospitalised in rural and urban areas and population per bed in the state

| major state  | no. per 1000 hospitalised |       | popn. per hospital bed* |
|--------------|---------------------------|-------|-------------------------|
|              | rural                     | urban |                         |
| AP           | 22                        | 28    | 1057                    |
| Assam        | 11                        | 16    | 1782                    |
| Bihar        | 10                        | 10    | 3029                    |
| Chhattisgarh | 12                        | 27    | -                       |
| Delhi        | -                         | 11    | 493                     |
| Gujarat      | 29                        | 36    | 709                     |
| Haryana      | 32                        | 31    | 3026                    |
| HP           | 32                        | 31    | -                       |
| J & K        | 18                        | 20    | 4790                    |
| Jharkhand    | 9                         | 22    | -                       |
| Karnataka    | 23                        | 26    | 1319                    |
| Kerala       | 101                       | 90    | 325                     |
| MP           | 18                        | 29    | 5582                    |
| Maharashtra  | 30                        | 36    | 920                     |
| Orissa       | 23                        | 30    | 3064                    |
| Punjab       | 30                        | 30    | 1623                    |
| Rajasthan    | 18                        | 25    | 3175                    |
| Tamil Nadu   | 37                        | 37    | 1135                    |
| Uttaranchal  | 17                        | 19    | -                       |
| UP           | 13                        | 20    | 2647                    |
| West Bengal  | 23                        | 35    | 1464                    |
| India        | 23                        | 31    | 1503                    |

\*Relate to 1.1.2002, except for Andhra Pradesh(1998), Assam(1991), Bihar(1992), Gujarat(1995), Karnataka(1998), Madhya Pradesh, Kerala and Orissa (2001), Maharashtra(2000), Tamil Nadu(1990) and Uttar Pradesh(1986) and are taken from 'Health Information of India' (2003), Central Bureau of Health Intelligence, Directorate General of Health Services, Ministry of Health and Family Welfare, Govt. of India.

of persons hospitalised during a reference period of 365 days in the rural and urban areas of major states. The estimates reveal wide inter-state variation in the proportion. In Kerala, the proportion, in both rural and urban areas, was much higher than in the rest of the major states. While for the country as a whole, out of every 1000 persons, 23 in the rural areas and 31 in the urban areas were hospitalised during a period of 365 days, the corresponding estimates for Kerala were as high as 101 and 90. The other states, reporting relatively high proportions of persons hospitalised though much less than Kerala were Tamil Nadu, Haryana, Maharashtra and Himachal Pradesh, rural Punjab and urban areas of West Bengal and Gujarat.

3.5.3.1 The data on health care services available from official sources is regularly compiled by the Directorate General of Health Services, Ministry of Health and Family Welfare, of the Government of India. The information relating to availability of beds for hospitalised treatment according to this Directorate is also included in Statement 21.2. Notice that population per hospital bed is a crude measure that does not distinguish between rural and urban location nor take account of the nature and perceived quality of hospitalisation services that indirectly get reflected in the survey-based estimates being compared. Consequently, one-to-one relationship between the two are not to be expected. Nevertheless

the survey results on hospitalisation seem to be broadly consistent with the data from the official source. The association is relatively closer with the survey-based results for the urban areas possibly because of the predominantly urban location of the hospital. Kerala, with an exceptionally advanced health care system in the country, had, according to the official source, a hospital bed for every 325 persons and the results of the present survey indicate an exceptionally high proportion of persons receiving hospitalised treatment in the state. Among the other states reporting a high proportion of persons receiving hospitalised treatment, Gujarat, Maharashtra, and Tamil Nadu had a hospital bed, on an average, for a relatively small number of persons. However, in Haryana, where a high proportion of persons reporting hospitalised treatment was reported, the ratio of population to number of hospital beds was much higher than the national average. The estimates for proportion of hospitalised cases are also shown in Figure 4.

3.5.4 *Hospitalisation by Type of Ailment*: Number (per 1000) of persons hospitalised with certain specific ailments, or ailment types, is presented in Statement 23. It may be of interest to note that

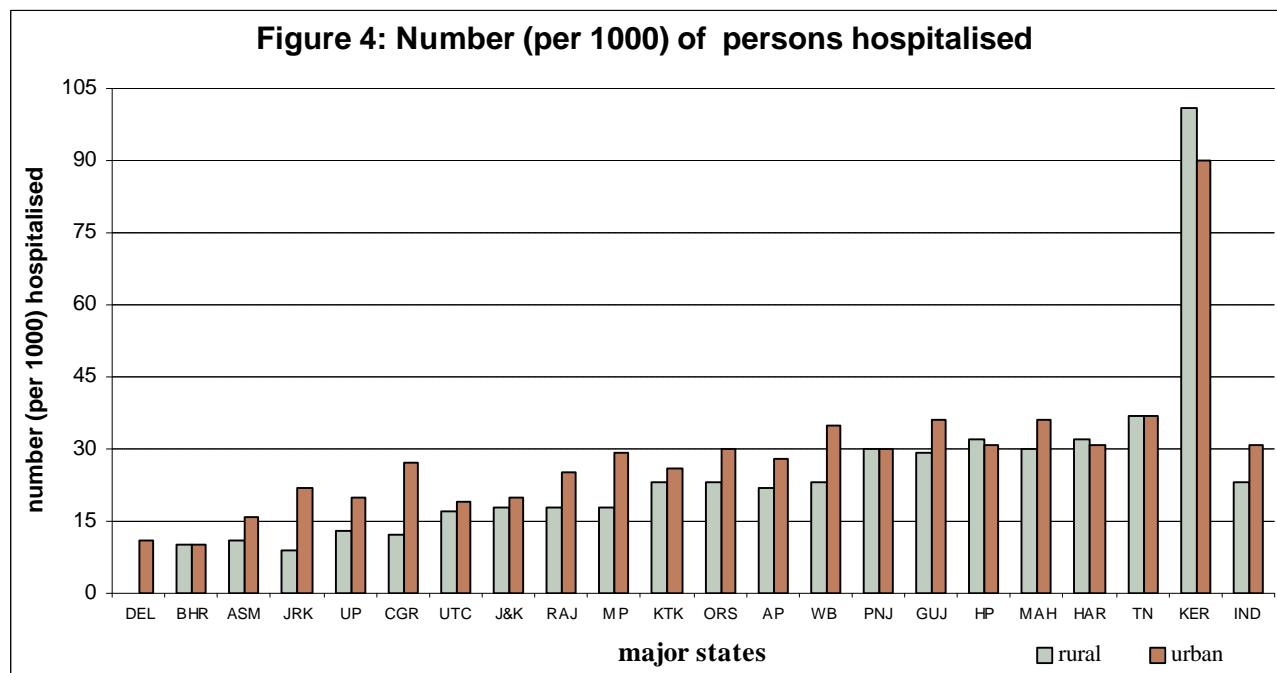

Statement 23

Per 1000 distribution of persons hospitalised by type of ailment

| type of ailment*                           | India |       |
|--------------------------------------------|-------|-------|
|                                            | rural | urban |
| Diarrhoea/ dysentery                       | 76    | 62    |
| Gastritis/ gastric or peptic ulcer         | 48    | 39    |
| Hepatitis/Jaundice                         | 15    | 22    |
| Heart disease                              | 43    | 80    |
| Hypertension                               | 18    | 32    |
| Respiratory incl. ear/nose/throat ailments | 35    | 30    |
| Tuberculosis                               | 30    | 17    |
| Bronchial asthma                           | 34    | 30    |
| Disorders of joints and bones              | 25    | 26    |
| Diseases of kidney/urinary system          | 37    | 49    |
| Gynaecological disorders                   | 52    | 50    |
| Neurological disorders                     | 32    | 32    |
| Psychiatric disorders                      | 10    | 6     |
| Cataract                                   | 29    | 24    |
| Diabetes mellitus                          | 18    | 24    |
| Malaria                                    | 32    | 36    |
| Fever of unknown origin                    | 79    | 67    |
| Locomotor disability                       | 13    | 9     |
| Accidents/injuries/Burns/etc.              | 101   | 88    |
| Cancer and other tumors                    | 28    | 32    |
| Other diagnosed ailments                   | 164   | 166   |
| Other undiagnosed ailments                 | 19    | 15    |
| any ailment                                | 1000  | 1000  |

\* ailments with at least 1 % share are only listed separately.

apart from the ‘other diagnosed ailments’ that account for nearly 17 per cent of the hospitalisation cases, the proportions of cases of hospitalisation due to accidents, injuries or burns were the highest among the ‘ailment types’ considered. They formed about one-tenth of the total cases of hospitalisation. Other ailments with relatively high proportion of cases of hospitalisation were ‘fevers of unknown origin’ (8 per cent), ‘diarrhoea/ dysentery’ (7 per cent), ‘heart disease’ and ‘gynaecological disorders’ (5 per cent each). There is not much of rural-urban difference in the proportion of hospitalisation cases within each ailment, except for the heart diseases, where the proportion of hospitalisation cases in the urban areas was almost double that in the rural areas.

3.5.6 Hospitalised Treatment and Type of Hospital: Statement 24 gives the share of government and private institutions in treating the hospitalised cases of ailments in the rural and urban areas of the country. As in case of non-hospitalised treatment of ailments, here too it was the private institutions that were the main provider of inpatient health care both in the rural

and urban areas. It is seen that the private institutions dominate the field in treating the inpatients and in 2004, about 58 and 62 per cent of the hospitalised cases, in the rural and urban areas, respectively, were treated by the non-government institutions. Note that the role of government and non-government institutions has reversed between the periods 1986-87 and 2004; about 60 per cent of the hospitalised cases were treated by the government institutions in 1986-87. A steady decline in the use of Government sources and a corresponding increase in the use of private sources over the last three NSS rounds are also evident. The changes were, however, sharper during the period between 1986-87 and 1995-96 rather than between 1995-96 and 2004. The share of the public provider and govt. provider in hospitalised treatments is also shown in Figure 5, separately for rural and urban areas.

#### Statement 24

Per 1000 distribution of cases of hospitalised treatment by type of hospital during 2004, 1995-96 and 1986-87

| type of hospital | India                       |                                |                                |                             |                                |                                |
|------------------|-----------------------------|--------------------------------|--------------------------------|-----------------------------|--------------------------------|--------------------------------|
|                  | rural                       |                                |                                | urban                       |                                |                                |
|                  | 2004<br>(60 <sup>th</sup> ) | 1995-96<br>(52 <sup>nd</sup> ) | 1986-87<br>(42 <sup>nd</sup> ) | 2004<br>(60 <sup>th</sup> ) | 1995-96<br>(52 <sup>nd</sup> ) | 1986-87<br>(42 <sup>nd</sup> ) |
| government       | 417                         | 438                            | 597                            | 382                         | 431                            | 603                            |
| non-government   | 583                         | 562                            | 403                            | 618                         | 569                            | 397                            |
| all hospitals    | 1000                        | 1000                           | 1000                           | 1000                        | 1000                           | 1000                           |

**3.5.7 Share of Public Provider in Hospitalised Treatment --Inter-state Variation:** Statement 24.1 gives the proportion (per 1000) of cases of hospitalised treatment received from public sector and private sector hospitals for rural and urban areas of major states. In most of the states, the proportion for the rural and urban populations differed little. On the whole, in both the sectors, the reliance on the private sector seems to be greater than that on the public sector. But the rural people had to rely more on public sector hospitals compared to the urban people.

Figure 5: Share of public provider in hospitalised treatment – all-India

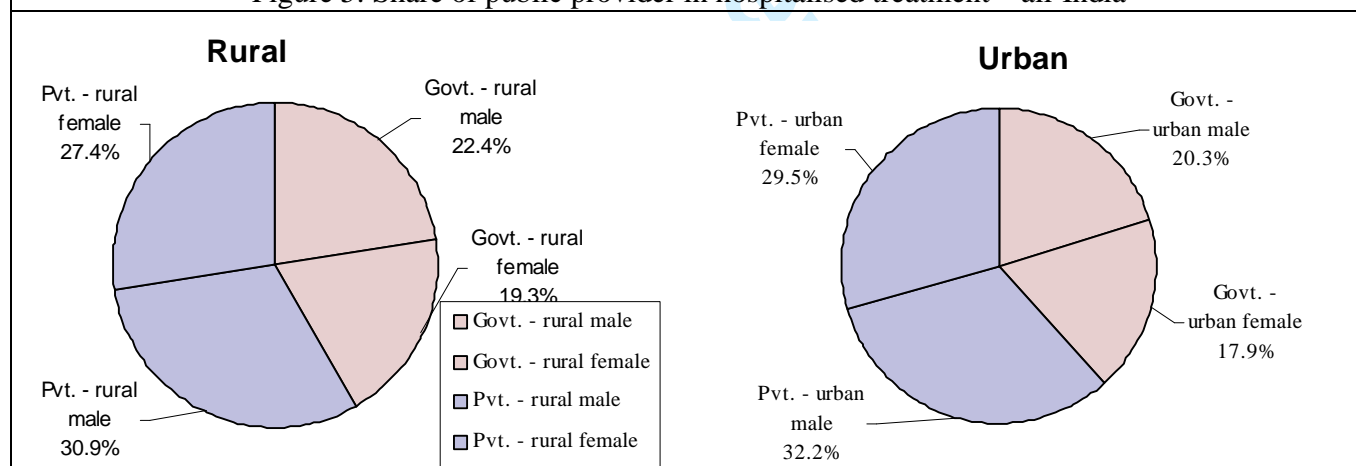

**3.5.7.1** The statement indicates that reliance on the public sector for hospitalised treatment varied a great deal from state to state. The proportion (per 1000) of hospitalised treatments received from public sector hospitals varied from 143 (Bihar) to 913 (Jammu & Kashmir) in the rural areas. Apart from Jammu & Kashmir, three other states, viz., Orissa, West Bengal and Himachal Pradesh, reported relatively high proportions of cases of hospitalised treatment from public

institutions. Bihar, Haryana and Maharashtra showed a high degree of reliance on private sector hospitals.

3.5.7.2 The information on percentage of beds in public and private hospitals in different states, obtained from the Directorate of Health Services, Ministry of Health and Family Welfare of Government of India is also presented in the statement. Ideally, the parity between the share of beds in public institutions and the proportion of hospitalised cases treated in the public institutions should exist if the performance in respect of quality of service and rate of servicing of the two types institutions (public and private) is more or less equal. The deviation, on the other hand, is expected to indicate the differences in the performance of the institutions. Although, the survey results on utilisation of public sector hospitals in different states are seen to be broadly consistent with the data available from the official source, the difference between the two proportions is found to be quite pronounced in some states; the proportion of hospitalised cases treated in the public institutions falls short of the proportion of beds in public institutions except three states, viz., Jammu & Kashmir and

#### Statement 25

Average duration of stay (in days) in hospital separately in public and private hospital

| sector        | India                                    |         |
|---------------|------------------------------------------|---------|
|               | average no. of days stayed in a hospital |         |
|               | type of hospital                         |         |
|               | govt.                                    | private |
| rural         | 10.9                                     | 8.3     |
| urban         | 10.8                                     | 7.3     |
| rural + urban | 10.9                                     | 8.0     |

Kerala where

the performance of the public institutions had been better than the private institutions. The states where the performance of public hospitals was very poor were Bihar, Haryana, Karnataka, Maharashtra, Punjab, Tamil Nadu and Uttar Pradesh. However, according to the Directorate, as on 1.1.202, there were beds only in the public sector hospitals in Madhya Pradesh and Rajasthan, but the results of the present survey reveal that a sizable proportion of the hospitalised treatment in these two states were provided by the private sector hospitals.

3.5.8 *Duration of Stay in Hospital:* Statement 25 shows the distribution of hospitalised cases by duration of stay in the

#### Statement 24.1

Number (per 1000) of hospitalised cases treated in public hospital and private hospital

| major state  | treated in hospital # |            |             |            | % of beds in govt. hospitals* |
|--------------|-----------------------|------------|-------------|------------|-------------------------------|
|              | rural                 |            | urban       |            |                               |
|              | govt. hosp.           | pvt. hosp. | govt. hosp. | pvt. hosp. |                               |
| AP           | 272                   | 727        | 358         | 642        | 40                            |
| Assam        | 742                   | 258        | 554         | 446        | 84                            |
| Bihar        | 144                   | 856        | 215         | 785        | 71                            |
| Chhattisgarh | 535                   | 465        | 493         | 507        | -                             |
| Delhi        | @                     | @          | 373         | 627        | 64                            |
| Gujarat      | 313                   | 687        | 261         | 739        | 42                            |
| Haryana      | 206                   | 794        | 290         | 710        | 75                            |
| HP           | 781                   | 219        | 895         | 105        | 91                            |
| J & K        | 913                   | 87         | 865         | 135        | 75                            |
| Jharkhand    | 466                   | 534        | 312         | 688        | -                             |
| Karnataka    | 400                   | 600        | 289         | 711        | 74                            |
| Kerala       | 356                   | 644        | 346         | 654        | 31                            |
| MP           | 585                   | 415        | 485         | 515        | -                             |
| Maharashtra  | 287                   | 713        | 280         | 720        | 57                            |
| Orissa       | 791                   | 209        | 731         | 269        | 98                            |
| Punjab       | 294                   | 706        | 264         | 736        | 75                            |
| Rajasthan    | 521                   | 479        | 637         | 363        | -                             |
| TN           | 408                   | 592        | 372         | 628        | 78                            |
| Uttaranchal  | 431                   | 569        | 342         | 658        | -                             |
| UP           | 269                   | 730        | 314         | 686        | 72                            |
| WB           | 786                   | 213        | 654         | 346        | 86                            |
| India        | 417                   | 583        | 382         | 618        | 62                            |

# Based on 'type of hospital' reported cases only.

\*: The data relate to 1.1.2002 and are taken from 'Health Information of India' (2003), Central Bureau of Health Intelligence, Directorate General of Health Services, Ministry of Health and Family Welfare, Govt. of India. @ 'not presented'

hospital, separately for the government and private hospitals. The average duration of stay for inpatient care in a hospital during a period of 365 days was shorter in the private hospitals than in the govt. hospitals in both the rural and urban sectors. The average duration of stay in govt. hospital was 11 days and that in a private hospital was only 8 days.

**3.5.9 Treatment Before and After Hospitalisation:** In most of the hospitalisation cases, the ailing

person generally undergoes treatment before getting admitted in the hospital and also, when they are discharged from the hospital as a follow-up of the ongoing treatment. The proportion of hospitalisation cases that were treated before hospitalisation and after hospitalisation and the distribution of such cases by the source of their treatment are given in Statement 26. About 55 per cent of hospitalisation cases got treated before hospitalisation, and 76 per cent continued treatment after hospitalisation. However, the average duration of treatment before hospitalisation (98 days) is almost double that of the duration of

Statement 26

Number per 1000 of hospitalisation cases receiving treatment before and after hospitalisation by source of treatment

| source of treatment                        | India                            |       |               |                                 |       |               |
|--------------------------------------------|----------------------------------|-------|---------------|---------------------------------|-------|---------------|
|                                            | treatment before hospitalisation |       |               | treatment after hospitalization |       |               |
|                                            | rural                            | urban | rural + urban | rural                           | urban | rural + urban |
| public hospital                            | 253                              | 211   | 239           | 333                             | 285   | 317           |
| public dispensary                          | 25                               | 35    | 28            | 16                              | 36    | 23            |
| private hospital                           | 244                              | 263   | 250           | 427                             | 465   | 440           |
| private doctor                             | 477                              | 490   | 481           | 222                             | 213   | 219           |
| all                                        | 1000                             | 1000  | 1000          | 1000                            | 1000  | 1000          |
| no. per 1000. of cases receiving treatment | 542                              | 569   | 551           | 749                             | 782   | 759           |
| average duration of treatment (0.0 days)   | 95.7                             | 102.0 | 97.8          | 46.1                            | 46.2  | 46.2          |

treatment after hospitalisation (46 days). Among the cases where treatment was taken, the most important source of treatment before hospitalisation was 'private doctors' (48 per cent) while it was 'private hospital' (44 per cent) in the case of treatment after hospitalisation.

### 3.6 Cost of Treatment

#### 3.6.1 Cost of Non-hospitalised Treatment

3.6.1.1 In the present survey, data on expenses incurred for medical treatment was collected separately for each case of hospitalisation for hospitalised treatment, but in the case of non-hospitalised treatment, for the ailing person as a whole irrespective of the number of spells and type of ailment or hospitalisation. The 'other expenses' was also recorded separately along with the *medical expenses*. *Medical expenses* included expenditure on items like medicines, bandages, plaster etc., fees paid for medical and para-medical services, charges for diagnostic tests, charges for operation and therapies, charges for ambulance, costs of oxygen and blood, etc. The 'other expenses' constituted all expenses relating to treatment of an ailment incurred by the household in connection with treatment of an ailing member of the household, but other than the medical expenditure proper. This category of expenditure included all transport charges (except ambulance charges) paid by the household members in connection with the treatment, lodging



charges of the patient and her or his escort(s), attendant charges paid, and personal medical appliances purchased during the reference period. The estimates of 'total expenditure' were arrived at as the sum of 'medical expenditure' and 'other expenditure'.

**3.6.1.2 Average Expenditure for Non-hospitalised Treatment per Ailing Person:** Statement 27 gives the estimates of *medical expenditure* incurred per treated person for non-hospitalised treatment during a period of 15 days. The statement provides separate estimates for treatment of male and female patients in rural and urban areas of the country. It is seen that, on an average, a higher amount was spent for

Statement 27  
Average total medical expenditure (Rs.) for non-hospitalised treatment per ailing person during last 15 days

| gender | India |       |
|--------|-------|-------|
|        | rural | urban |
| male   | 275   | 322   |
| female | 240   | 291   |
| person | 257   | 306   |

Statement 28  
Average total expenditure (Rs.) for non-hospitalised treatment per treated person during the last 15 days for each MPCE class (Rs.)

| MPCE class              | India                                |                |                   |                   |
|-------------------------|--------------------------------------|----------------|-------------------|-------------------|
|                         | medical expn.: goods & services from |                | other expenditure | total expenditure |
|                         | govt. instn.                         | private instn. |                   |                   |
| <b>rural</b>            |                                      |                |                   |                   |
| <i>less than 225</i>    | 9                                    | 163            | 19                | 191               |
| <i>225 – 255</i>        | 8                                    | 212            | 18                | 238               |
| <i>255 – 300</i>        | 15                                   | 174            | 21                | 210               |
| <i>300 – 340</i>        | 19                                   | 190            | 27                | 237               |
| <i>340 – 380</i>        | 12                                   | 194            | 24                | 229               |
| <i>380 – 420</i>        | 19                                   | 202            | 28                | 250               |
| <i>420 – 470</i>        | 9                                    | 211            | 22                | 243               |
| <i>470 – 525</i>        | 13                                   | 316            | 29                | 358               |
| <i>525 – 615</i>        | 7                                    | 241            | 28                | 276               |
| <i>615 – 775</i>        | 4                                    | 263            | 30                | 297               |
| <i>775 – 950</i>        | 11                                   | 280            | 32                | 323               |
| <i>950 &amp; above</i>  | 12                                   | 377            | 37                | 426               |
| <i>all</i>              | 11                                   | 246            | 27                | 285               |
| <b>urban</b>            |                                      |                |                   |                   |
| <i>less than 300</i>    | 4                                    | 203            | 25                | 231               |
| <i>300 – 350</i>        | 2                                    | 246            | 10                | 258               |
| <i>350 – 425</i>        | 5                                    | 185            | 9                 | 199               |
| <i>425 – 500</i>        | 5                                    | 238            | 15                | 259               |
| <i>500 – 575</i>        | 9                                    | 213            | 14                | 236               |
| <i>575 – 665</i>        | 8                                    | 244            | 20                | 272               |
| <i>665 – 775</i>        | 8                                    | 225            | 20                | 253               |
| <i>775 – 915</i>        | 5                                    | 280            | 18                | 304               |
| <i>915 – 1120</i>       | 3                                    | 270            | 17                | 290               |
| <i>1120 – 1500</i>      | 4                                    | 389            | 26                | 418               |
| <i>1500 – 1925</i>      | 4                                    | 352            | 15                | 371               |
| <i>1925 &amp; above</i> | 17                                   | 496            | 35                | 548               |
| <i>all</i>              | 7                                    | 299            | 20                | 326               |

non-hospitalised treatment for an ailing person in the urban areas than that for ailing person in the rural areas. Secondly, while Rs. 275 to Rs. 322 was spent in a period of 15 days for treatment of an ailing male, a little lesser amount was spent for treatment of ailing female – cost of treatment being Rs. 240 to Rs. 291.

**3.6.1.3 Expenditure for Non-hospitalised Treatment per Treated Person and Level of Living:** Statement 28 gives the *total expenditure* incurred on non-hospitalised treatment per treated person for different monthly per capita consumer expenditure classes. The *total medical expenditure* has been divided into two parts – the part paid to the govt sources and the other to the private sources for availing the total service for treatment of the ailment. As stated before, the *other expenditure* relates to the treatment but not on medical purposes. It is seen that the *total expenditure* incurred on non-hospitalised treatment is broadly positively correlated with levels of living measured in terms of MPCE. The average *total expenditure* for treatment, in urban areas, was Rs. 326 -- much higher than that in the rural areas (Rs. 285). Of these, about 90 per cent were spent on account of *medical treatment* and the rest for other related non-medical expenditure. It may be noted in this context that the data on expenditure were neither collected separately for each spell of ailment nor by source of treatment, but for a treated ailing person as a whole. Thus,

1  
2  
3  
4  
5  
6  
7  
8  
9  
10  
11  
12  
13  
14  
15  
16  
17  
18  
19  
20  
21  
22  
23  
24  
25  
26  
27  
28  
29  
30  
31  
32  
33  
34  
35  
36  
37  
38  
39  
40  
41  
42

the expenditure shown under 'govt. institution' or 'private institution' gives only the break-up of the average *medical expenditure* incurred for treating a person and not the entire amount of expenditure required to be made for treating a spell of ailment of an ailing person in case the entire treatment had been taken from a single source, i.e., the 'government institution' or 'private institution'. The share of *medical expenditure* of govt. institutions for providing goods and services for treatment was far less than that of the private institutions. This phenomenon is more prominent in the urban areas. One of the reasons may be that the government institutions render a large amount of free or highly subsidised services to the people compared to the private institutions. The other reason is that the role of government institutions is very limited in respect of number of persons treated (only 22–23 per cent of treated spells of ailments get treated from government sources). Note that the share of expenditure on private sources in treatment expenses is seen to be more for households with a higher level of living.

3.6.1.4 *Inter-state Variation in Total Expenditure per Non-hospitalised Ailing Person:* Statements 29R and 29U (pp 40-41) gives the average *medical expenditure* by source of treatment and other related non-medical expenditure per treated person during a period of 15 days for the rural and urban areas of different states. It may be noted that the estimates given in the statement pertain only to the non-hospitalised treatment of ailments. It is seen that the average total expenditure per treated ailment was Rs.285 and Rs.326 in rural and urban areas respectively at the all India level. The medical expenditure per treated ailment varied widely across the states. In the rural areas, it varied from Rs.182 in Kerala to Rs.390 in Rajasthan, and in the urban areas, from Rs.193 in Kerala to Rs. 443 in Jammu & Kashmir. Note that in Kerala, the proportion of cases treated through govt. institutions was also very high. The other states reporting relatively low medical expenditure per treated ailment in the rural areas were Tamil Nadu (Rs.184), Gujarat (Rs.206) and West Bengal (Rs.207). In the urban areas, besides Kerala, relatively low expenditure per treated ailment was reported in Uttaranchal (Rs. 250), Chhattisgarh (Rs.276) and Haryana as well as in Tamil Nadu (Rs.277). Interestingly, contrary to what is observed for most of the states as well as for the country as a whole, Uttar Pradesh, Uttaranchal and Haryana reported a higher medical expenditure per treated ailment in the rural areas than in the urban areas.

3.6.1.5 *Loss of Household Income:* Often ailment of a working member of the household causes loss of household income. Ailment of a non-working member too causes disruption of usual activity of the working member of the household, which in turn results in loss of household income. While for persons getting pay, either as regular salaried employee or casual labour, the amount of loss in income during the period of treatment was derived on the basis of pay that he/she was drawing before the hospitalisation/ailment; for the self-employed persons, it was imputed based on the proportionate average income (lost) during those days. For non-ailing members of the household who could not carry out their 'work' (economic activity) in order to attend to the ailing member, the loss of income for them, if any, was derived in the same manner and was also included in the loss of income of the household. Amount of such a loss incurred by the household during the reference period was collected in the survey. Estimates of loss of household income per treated person as obtained from the survey have also been placed in Statements 29R and 29U (pp 40-41) to get an idea of the total burden on the household due to treatment of ailment. The loss of household income was the highest in Bihar (Rs. 585) followed



Statement 30

Per 1000 distribution of household total expenditure on treatment during the last 15 days by source of finance for each MPCE class

| MPCE classes<br>(Rs.) | source of finance         |                 |         | India        |
|-----------------------|---------------------------|-----------------|---------|--------------|
|                       | hhd<br>income/<br>savings | borro-<br>wings | others* | total        |
|                       |                           |                 |         |              |
|                       |                           |                 |         | <b>rural</b> |
| less than 225         | 785                       | 134             | 81      | 1000         |
| 225 – 255             | 688                       | 214             | 98      | 1000         |
| 255 – 300             | 785                       | 176             | 39      | 1000         |
| 300 – 340             | 689                       | 262             | 50      | 1000         |
| 340 – 380             | 722                       | 164             | 114     | 1000         |
| 380 – 420             | 725                       | 196             | 80      | 1000         |
| 420 – 470             | 740                       | 177             | 83      | 1000         |
| 470 – 525             | 684                       | 279             | 38      | 1000         |
| 525 – 615             | 806                       | 147             | 47      | 1000         |
| 615 – 775             | 865                       | 106             | 30      | 1000         |
| 775 – 950             | 869                       | 116             | 15      | 1000         |
| 950 or more           | 794                       | 136             | 70      | 1000         |
| all                   | 772                       | 172             | 56      | 1000         |
|                       |                           |                 |         | <b>urban</b> |
| less than 300         | 717                       | 244             | 39      | 1000         |
| 300 – 350             | 778                       | 127             | 96      | 1000         |
| 350 – 425             | 820                       | 147             | 33      | 1000         |
| 425 – 500             | 732                       | 201             | 68      | 1000         |
| 500 – 575             | 851                       | 116             | 33      | 1000         |
| 575 – 665             | 856                       | 125             | 19      | 1000         |
| 665 – 775             | 843                       | 99              | 58      | 1000         |
| 775 – 915             | 932                       | 38              | 29      | 1000         |
| 915 – 1120            | 911                       | 47              | 42      | 1000         |
| 1120 – 1500           | 871                       | 60              | 69      | 1000         |
| 1500 – 1925           | 964                       | 12              | 24      | 1000         |
| 1925 or more          | 862                       | 11              | 127     | 1000         |
| all                   | 865                       | 71              | 64      | 1000         |

\*include contribution from friends & relatives and sale of ornaments and other physical assets, draught animals, etc.

period. The expenditure for hospitalised treatment on items such as doctor’s fees, bed charges, and cost of medicines and other materials and services supplied by the hospital, as well as charges for diagnostic tests done at the hospital, were included in *medical expenditure*. The ‘other expenses’ relating to hospitalised treatment is the same as that for non-medical treatments. The estimates of ‘total expenditure’ for hospitalised treatment were arrived at as the sum of ‘medical expenditure’ and ‘other expenditure’.

by Himachal Pradesh (Rs. 200) and Andhra Pradesh (Rs. 175) in the treatment of rural population. This was much higher than the all-India estimate of Rs. 135 as the loss of household income. It was Orissa which had the highest loss of household income (Rs. 887) in treatment of urban population, followed by Jharkhand (Rs. 220), Bihar (Rs. 150) and Andhra Pradesh (Rs. 124), the loss being of Rs. 96 at the all-India level.

3.6.1.6 *Source of Finance for Non-hospitalised Treatment during the last 15 days:* The results relating to the sources from which the household met their expenditure on treatment during the last 15 days are given in Statement 30 in the form of distribution for each household monthly per capita expenditure class for both the rural and urban areas at the all-India level. It can be seen that 77 and 88 per cent of the *total expenditure* for treatment of rural and urban population, respectively was financed by households’ own ‘income and savings’. This was 17 and 7 per cent in the case of financing by ‘borrowing’ by the rural and urban households, respectively. As expected, the dependency on own ‘income/savings’ for financing of expenditure on treatment was more in the case of households with higher levels of living as measured by monthly consumption expenditure.

3.6.2 Cost of Hospitalised Treatment

3.6.2.1 For the hospitalised treatments, information on expenses was collected separately for each event of hospitalisation during the reference

Statement 31

Average medical expenditure (Rs.) per hospitalisation

| gender | India |         |       |         |
|--------|-------|---------|-------|---------|
|        | rural |         | urban |         |
|        | 2004  | 1995-96 | 2004  | 1995-96 |
| male   | 5,946 | 3,778   | 9,535 | 4,185   |
| female | 5,406 | 2,510   | 8,112 | 3,625   |
| person | 5,695 | 3,202   | 8,851 | 3,921   |

Note: The survey period of NSS 60<sup>th</sup> round was Jan. – June 2004 while that for 52<sup>nd</sup> was July 1995 – June 1996.

3.6.2.2 *Average Expenditure for Medical Treatment per Hospitalisation*: Statement 31 gives the estimates of average *medical expenditure* incurred per hospitalised case of treatment during the reference period of 365 days. The statement provides separate estimates for treatment of male

Statement 32

Average medical expenditure (Rs.) per hospitalisation case

| type of hospital     | India |         |        |         |
|----------------------|-------|---------|--------|---------|
|                      | rural |         | urban  |         |
|                      | 2004  | 1995-96 | 2004   | 1995-96 |
| government hospitals | 3,238 | 2,080   | 3,877  | 2,195   |
| private hospitals    | 7,408 | 4,300   | 11,553 | 5,344   |
| any hospital         | 5,695 | 3,202   | 8,851  | 3,921   |

and female patients in the rural and urban areas of the country as a whole. It is seen that, on an average, a much higher amount was spent for treatment per hospitalised case by people in the urban (Rs. 8,851) than in the rural (Rs. 5,695). The statement also indicates the presence of a distinct gender bias in the urban areas in respect of expenditure incurred per hospitalisation, though the estimates of proportion of persons hospitalised (given in Statement 21) do not reflect any perceptible gender difference either in rural or urban areas. The average amount spent for treating a female as inpatient in a hospital was less (Rs. 5,406 in the rural and Rs. 8,112 in the urban) than for a male (Rs. 5,946 in the rural and Rs. 9,535 in the urban). Another point to be noted is that the expenditure for inpatient treatment in the hospitals has increased substantially since 1996-97 – from Rs. 3,202 to Rs. 5,695 in the rural areas and from Rs. 3,921 to Rs. 8,851 in the urban areas.

3.6.2.2 *Cost of Treatment per Hospitalisation and Type of Hospital*: Statement 32 gives estimates of average *medical expenditure* incurred for an event of hospitalisation in different types of establishments separately for the rural and urban population of the country. It is seen that the average *medical expenditure* for hospitalised treatment from a public sector hospital was much lower than that from a private sector hospital in both rural and urban areas - less than half in the rural areas and about one-third in urban areas. The rural population spent, on an average, Rs.3,238 for a hospitalised treatment in a public sector hospital and Rs.7,408 for one in a private sector hospital. The average *medical expenditure* of the urban population for a hospitalised treatment in a public and private hospital was, respectively, Rs.3,877 and Rs.11,553. Moreover, compared to the estimate of *medical expenditure* obtained from the 1995-96 (NSS 52<sup>nd</sup> round) survey, the expenditure showed a steep rise in 2004, for government and the private hospitals. A maximum rise seems to have taken place for the private hospitals in the urban areas, a category that accounts for 62 per cent of hospitalisation cases.

3.6.2.3 *Expenditure on Hospitalisation and Level of Living*: Statement 33 gives the average *medical expenditure* incurred on a case of hospitalisation by households belonging to different classes of monthly per capita consumer expenditure, widely considered to reflect the level of living of a household, separately in government and private hospitals. It is seen that the expenditure incurred on hospitalisation is broadly correlated with levels of living irrespective of type of hospital and sector (rural/urban) and the relationship between them is positive. The relationship seems to be stronger in the rural areas than in the urban areas. A sudden drop in *medical expenditure* on hospitalisation as one moves from the first (lowest) expenditure class to

## Statement 33

Average medical expenditure per hospitalisation by type of hospital for each household MPCE class

India

| MPCE class           | rural                   |        | MPCE class           | urban                   |        |
|----------------------|-------------------------|--------|----------------------|-------------------------|--------|
|                      | av. med. expn. in hosp. |        |                      | av. med. expn. in hosp. |        |
|                      | Govt.                   | Pvt.   |                      | Govt.                   | Pvt.   |
| <i>less than 225</i> | 2,530                   | 5,431  | <i>less than 300</i> | 1,746                   | 9,576  |
| 225 – 255            | 3,173                   | 4,886  | 300 – 350            | 1,640                   | 3,357  |
| 255 – 300            | 2,087                   | 5,543  | 350 – 425            | 2,594                   | 4,852  |
| 300 – 340            | 2,950                   | 5,777  | 425 – 500            | 2,690                   | 8,258  |
| 340 – 380            | 2,586                   | 5,245  | 500 – 575            | 2,365                   | 6,158  |
| 380 – 420            | 2,094                   | 6,895  | 575 – 665            | 2,984                   | 5,442  |
| 420 – 470            | 2,884                   | 6,028  | 665 – 775            | 3,011                   | 10,823 |
| 470 – 525            | 3,017                   | 6,781  | 775 – 915            | 4,304                   | 8,074  |
| 525 – 615            | 3,509                   | 6,811  | 915 – 1120           | 5,226                   | 10,149 |
| 615 – 775            | 4,049                   | 7,327  | 1120 – 1500          | 5,402                   | 13,758 |
| 775 – 950            | 4,192                   | 9,843  | 1500 – 1925          | 8,231                   | 16,433 |
| 950 & above          | 6,374                   | 10,749 | 1925 & above         | 15,132                  | 22,918 |
| all                  | 3,238                   | 7,408  | all                  | 3,877                   | 11,553 |

the second can be seen in the case of private hospitals in both the sectors. This drop, which is difficult to explain, is more pronounced in the urban sector than in the rural sector. One reason could be that the poorest segment of the population, lacking the right connections, are forced to seek inpatient treatment from the private hospitals in emergencies.

3.6.2.4 Total Expenditure per Hospitalised Case and Inter-state Variation: Statement 34 gives the average total expenditure and medical

expenditure per event of hospitalisation during 365 days by source of treatment for the rural and urban areas. It can be seen that both the average total expenditure and the medical expenditure proper per hospitalisation case were almost 50 per cent higher in the urban areas than in the rural areas. The differentials in expenditure between private sector hospitals and public hospitals have already been discussed (in para 3.6.2.2). As expected, the loss in household income due to hospitalisation was more when a male member of the household was hospitalised and was very high in the urban areas. The inter-state variation in the total expenditure is shown in Statements 34.1R and 34.1U (pp 42-43) for rural and urban areas, respectively. Like the non-hospitalised treatment, the cost per hospitalisation in a government establishment was lowest in Tamil Nadu (Rs. 637 in the rural areas and Rs. 1,666 in the urban). In fact, it was relatively low in all the southern states, as well as in Gujarat, Maharashtra and West Bengal. Moreover, on an average, the public hospitals were less expensive than the private sector hospitals in the rural and urban

areas of all the states, except urban Haryana and Bihar. The difference between public and private hospitals in average medical expenditure for hospitalised treatment received was more pronounced in the urban areas than in the rural areas. The difference in costs of hospitalised treatment from public and private sector hospitals was more

## Statement 34

Average medical and other related non-medical expenditure (Rs.) per hospitalisation case during 365 days by source of treatment

India

| gender and sector | medical expenditure by source of treatment |        |       | other expenditure | total expenditure | loss of household income |
|-------------------|--------------------------------------------|--------|-------|-------------------|-------------------|--------------------------|
|                   | Govt.                                      | Pvt.   | all   |                   |                   |                          |
| rural male        | 3,550                                      | 7,640  | 5,946 | 550               | 6,496             | 760                      |
| rural female      | 2,874                                      | 7,145  | 5,406 | 508               | 5,914             | 493                      |
| rural person      | 3,238                                      | 7,408  | 5,695 | 530               | 6,225             | 636                      |
| urban male        | 4,135                                      | 12,448 | 9,535 | 545               | 10,080            | 1,073                    |
| urban female      | 3,600                                      | 10,580 | 8,112 | 485               | 8,596             | 391                      |
| urban person      | 3,877                                      | 11,553 | 8,851 | 516               | 9,367             | 745                      |

pronounced in Tamil Nadu and other southern states, as well as in Himachal Pradesh, West Bengal, Maharashtra and Jammu & Kashmir. The highest expenditure for public sector hospitals was reported from rural Haryana and urban Bihar. In the case of private sector hospitals, the highest expenditure was reported in Himachal Pradesh.

**3.6.2.5 Loss of Household Income:** Estimate of loss of household income per treated person as obtained from the survey have also been placed in Statements 34.1R and 34.1U (pp 42-43) to get an idea of the total burden on the households due to hospitalisation. The loss of household income was highest in Himachal Pradesh (Rs. 1,893), followed by Jammu & Kashmir (Rs. 1,377) and Jharkhand (Rs. 1,357) in the rural areas. This was much higher than the all-India estimate of Rs. 636. It was Jharkhand which revealed the highest loss of household income (Rs. 3,971) in the urban areas, followed by Assam (Rs. 1,714) and Andhra Pradesh (Rs. 1,650) - the extent of loss being Rs. 745 at the all-India level.

**3.6.2.6 Source of Finance for Hospitalised Treatment during the last 365 days:** The contributions of different sources towards financing the total expenditure on hospitalisation are

| Statement 35                                                                                                                                                      |                          |            |         |       |                      |                          |            |         |       |
|-------------------------------------------------------------------------------------------------------------------------------------------------------------------|--------------------------|------------|---------|-------|----------------------|--------------------------|------------|---------|-------|
| Per 1000 distribution of household total expenditure on treatment on account of hospitalisation during the last 365 days by source of finance for each MPCE class |                          |            |         |       |                      |                          |            |         |       |
|                                                                                                                                                                   |                          |            |         |       |                      |                          |            |         | India |
| rural                                                                                                                                                             |                          |            |         |       | urban                |                          |            |         |       |
| MPCE classes (Rs.)                                                                                                                                                | source of finance        |            |         |       | MPCE classes (Rs.)   | source of finance        |            |         |       |
|                                                                                                                                                                   | household income/savings | borrowings | others* | total |                      | household income/savings | borrowings | others* | total |
| <i>less than 225</i>                                                                                                                                              | 332                      | 435        | 233     | 1000  | <i>less than 300</i> | 541                      | 308        | 151     | 1000  |
| <i>225 – 255</i>                                                                                                                                                  | 265                      | 556        | 178     | 1000  | <i>300 – 350</i>     | 338                      | 401        | 262     | 1000  |
| <i>255 – 300</i>                                                                                                                                                  | 314                      | 488        | 198     | 1000  | <i>350 – 425</i>     | 322                      | 334        | 343     | 1000  |
| <i>300 – 340</i>                                                                                                                                                  | 349                      | 462        | 189     | 1000  | <i>425 – 500</i>     | 345                      | 486        | 169     | 1000  |
| <i>340 – 380</i>                                                                                                                                                  | 379                      | 461        | 161     | 1000  | <i>500 – 575</i>     | 472                      | 359        | 169     | 1000  |
| <i>380 – 420</i>                                                                                                                                                  | 347                      | 402        | 251     | 1000  | <i>575 – 665</i>     | 419                      | 407        | 174     | 1000  |
| <i>420 – 470</i>                                                                                                                                                  | 391                      | 451        | 158     | 1000  | <i>665 – 775</i>     | 573                      | 295        | 132     | 1000  |
| <i>470 – 525</i>                                                                                                                                                  | 399                      | 435        | 166     | 1000  | <i>775 – 915</i>     | 526                      | 283        | 191     | 1000  |
| <i>525 – 615</i>                                                                                                                                                  | 420                      | 411        | 169     | 1000  | <i>915 – 1120</i>    | 625                      | 191        | 184     | 1000  |
| <i>615 – 775</i>                                                                                                                                                  | 418                      | 406        | 176     | 1000  | <i>1120 – 1500</i>   | 585                      | 203        | 212     | 1000  |
| <i>775 – 950</i>                                                                                                                                                  | 419                      | 411        | 170     | 1000  | <i>1500 – 1925</i>   | 707                      | 116        | 177     | 1000  |
| <i>950 or more</i>                                                                                                                                                | 485                      | 331        | 184     | 1000  | <i>1925 or more</i>  | 665                      | 107        | 229     | 1000  |
| <i>all</i>                                                                                                                                                        | 409                      | 411        | 181     | 1000  | <i>all</i>           | 578                      | 227        | 195     | 1000  |

\*include contribution from friends & relatives and sale of ornaments and other physical assets, draught animals, etc.

tabulated in Statement 35 for household at different levels of living as measured by monthly per capita expenditure. A perceptible rural-urban difference is noted in the relative importance of different source categories. While the rural households depended in equal measure on their 'income/saving' and on 'borrowing' – 41 per cent each -- the urban households relied much more on their 'income/saving' (58 per cent) for financing expenditure on hospitalisation, than on 'borrowings' (23 per cent). The households in the lower and middle expenditure classes in the rural areas, however, depended more on 'borrowings', as their 'income/savings', perhaps, were not adequate to meet this expenditure.

## Statement 3.1

Per 1000 distribution of households by structure of the dwelling for each major states

| major state      | type of structure of the dwelling |            |         |       |       |            |         |       |
|------------------|-----------------------------------|------------|---------|-------|-------|------------|---------|-------|
|                  | rural                             |            |         |       | urban |            |         |       |
|                  | pucca                             | semi-pucca | kutchha | total | pucca | semi-pucca | kutchha | total |
| Andhra Pradesh   | 616                               | 181        | 203     | 1000  | 864   | 70         | 66      | 1000  |
| Assam            | 165                               | 433        | 402     | 1000  | 622   | 311        | 64      | 1000  |
| Bihar            | 431                               | 255        | 313     | 1000  | 825   | 60         | 114     | 1000  |
| Chhattisgarh     | 91                                | 894        | 15      | 1000  | 706   | 281        | 8       | 1000  |
| Delhi            | -                                 | -          | -       | -     | 949   | 24         | 27      | 1000  |
| Gujarat          | 594                               | 349        | 57      | 1000  | 926   | 57         | 16      | 1000  |
| Haryana          | 940                               | 34         | 26      | 1000  | 975   | 18         | 7       | 1000  |
| Himachal Pradesh | 723                               | 251        | 26      | 1000  | 843   | 89         | 68      | 1000  |
| Jammu & Kashmir  | 352                               | 444        | 204     | 1000  | 714   | 227        | 59      | 1000  |
| Jharkhand        | 220                               | 564        | 214     | 1000  | 809   | 170        | 21      | 1000  |
| Karnataka        | 466                               | 473        | 60      | 1000  | 746   | 224        | 29      | 1000  |
| Kerala           | 730                               | 198        | 72      | 1000  | 847   | 129        | 24      | 1000  |
| Madhya Pradesh   | 313                               | 588        | 99      | 1000  | 788   | 196        | 15      | 1000  |
| Maharashtra      | 532                               | 418        | 50      | 1000  | 864   | 117        | 19      | 1000  |
| Orissa           | 209                               | 289        | 502     | 1000  | 651   | 153        | 189     | 1000  |
| Punjab           | 840                               | 135        | 26      | 1000  | 913   | 63         | 24      | 1000  |
| Rajasthan        | 596                               | 214        | 189     | 1000  | 961   | 29         | 9       | 1000  |
| Tamil Nadu       | 535                               | 217        | 248     | 1000  | 779   | 119        | 102     | 1000  |
| Uttaranchal      | 837                               | 14         | 149     | 1000  | 968   | 29         | 3       | 1000  |
| Uttar Pradesh    | 561                               | 244        | 195     | 1000  | 868   | 88         | 44      | 1000  |
| West Bengal      | 262                               | 469        | 269     | 1000  | 789   | 166        | 45      | 1000  |
| India            | 480                               | 332        | 188     | 1000  | 842   | 115        | 43      | 1000  |

## Statement 5.1R

Per 1000 distribution of households by major source of drinking water and number (per 1000) of households treating water before drinking for each major state in rural areas

| major state      | major source of drinking water |     |                     |           |            |                                  |              |        | total | Rural                                       |
|------------------|--------------------------------|-----|---------------------|-----------|------------|----------------------------------|--------------|--------|-------|---------------------------------------------|
|                  | bottled water                  | tap | tube-well/hand pump | tan- kers | pucca well | tank/ pond reserved for drinking | river/ canal | others |       | no. per 1000 treating water before drinking |
| Andhra Pradesh   | 25                             | 572 | 279                 | 2         | 99         | 9                                | 7            | 8      | 1000  | 243                                         |
| Assam            | 0                              | 63  | 609                 | 3         | 201        | 53                               | 33           | 38     | 1000  | 273                                         |
| Bihar            | 0                              | 23  | 925                 | 1         | 46         | 1                                | 3            | 1      | 1000  | 226                                         |
| Chhattisgarh     | 1                              | 48  | 763                 | 0         | 164        | 6                                | 3            | 13     | 1000  | 138                                         |
| Gujarat          | 17                             | 470 | 386                 | 2         | 88         | 33                               | 3            | 1      | 1000  | 727                                         |
| Haryana          | 2                              | 445 | 446                 | 5         | 94         | 8                                | 0            | 0      | 1000  | 9                                           |
| Himachal Pradesh | 45                             | 758 | 56                  | 2         | 25         | 15                               | 3            | 96     | 1000  | 35                                          |
| Jammu & Kashmir  | 114                            | 493 | 157                 | 0         | 12         | 140                              | 56           | 27     | 1000  | 337                                         |
| Jharkhand        | 1                              | 19  | 473                 | 7         | 458        | 1                                | 31           | 10     | 1000  | 387                                         |
| Karnataka        | 11                             | 563 | 307                 | 0         | 104        | 8                                | 5            | 3      | 1000  | 982                                         |
| Kerala           | 4                              | 107 | 62                  | 0         | 766        | 15                               | 8            | 37     | 1000  | 39                                          |
| Madhya Pradesh   | 4                              | 116 | 625                 | 0         | 237        | 4                                | 10           | 4      | 1000  | 8                                           |
| Maharashtra      | 37                             | 415 | 259                 | 48        | 213        | 5                                | 14           | 8      | 1000  | 403                                         |
| Orissa           | 0                              | 64  | 718                 | 3         | 183        | 5                                | 10           | 17     | 1000  | 497                                         |
| Punjab           | 3                              | 302 | 687                 | 0         | 4          | 0                                | 0            | 5      | 1000  | 1                                           |
| Rajasthan        | 9                              | 236 | 493                 | 29        | 133        | 76                               | 18           | 5      | 1000  | 7                                           |
| Tamil Nadu       | 14                             | 815 | 100                 | 6         | 48         | 8                                | 3            | 5      | 1000  | 35                                          |
| Uttaranchal      | 22                             | 614 | 269                 | 0         | 1          | 4                                | 0            | 91     | 1000  | 581                                         |
| Uttar Pradesh    | 1                              | 39  | 883                 | 0         | 75         | 1                                | 1            | 0      | 1000  | 563                                         |
| West Bengal      | 1                              | 67  | 854                 | 5         | 65         | 0                                | 1            | 6      | 1000  | 184                                         |
| India            | 10                             | 248 | 564                 | 7         | 139        | 13                               | 8            | 10     | 1000  | 199                                         |



## Summary of Findings

## Statement 5.1U

Per 1000 distribution of households by major source of drinking water and number (per 1000) of households treating water before drinking for each major state in urban areas

| major state      | major source of drinking water |     |                         |              |            |                                  |                 |        | total | Urban                                       |
|------------------|--------------------------------|-----|-------------------------|--------------|------------|----------------------------------|-----------------|--------|-------|---------------------------------------------|
|                  | bottled water                  | tap | tube-well/<br>hand pump | tan-<br>kers | pucca well | tank/ pond reserved for drinking | river/<br>canal | others |       | no. per 1000 treating water before drinking |
| Andhra Pradesh   | 17                             | 783 | 127                     | 48           | 25         | 0                                | 0               | 0      | 1000  | 475                                         |
| Assam            | 2                              | 321 | 495                     | 0            | 164        | 18                               | 0               | 0      | 1000  | 515                                         |
| Bihar            | 0                              | 310 | 680                     | 0            | 9          | 0                                | 0               | 0      | 1000  | 495                                         |
| Chhattisgarh     | 4                              | 688 | 230                     | 7            | 68         | 0                                | 3               | 0      | 1000  | 351                                         |
| Delhi            | 78                             | 792 | 80                      | 49           | 0          | 0                                | 0               | 1      | 1000  | 142                                         |
| Gujarat          | 26                             | 859 | 91                      | 14           | 2          | 7                                | 1               | 0      | 1000  | 820                                         |
| Haryana          | 6                              | 752 | 229                     | 3            | 11         | 0                                | 0               | 0      | 1000  | 93                                          |
| Himachal Pradesh | 119                            | 819 | 53                      | 0            | 4          | 1                                | 0               | 3      | 1000  | 178                                         |
| Jammu & Kashmir  | 93                             | 859 | 48                      | 0            | 0          | 0                                | 0               | 0      | 1000  | 706                                         |
| Jharkhand        | 35                             | 435 | 331                     | 5            | 185        | 2                                | 2               | 5      | 1000  | 555                                         |
| Karnataka        | 18                             | 815 | 117                     | 26           | 20         | 0                                | 0               | 4      | 1000  | 969                                         |
| Kerala           | 6                              | 347 | 49                      | 0            | 591        | 2                                | 0               | 5      | 1000  | 329                                         |
| Madhya Pradesh   | 11                             | 648 | 278                     | 15           | 48         | 0                                | 0               | 0      | 1000  | 61                                          |
| Maharashtra      | 38                             | 879 | 55                      | 0            | 27         | 0                                | 0               | 0      | 1000  | 450                                         |
| Orissa           | 0                              | 492 | 278                     | 0            | 221        | 0                                | 0               | 10     | 1000  | 898                                         |
| Punjab           | 80                             | 682 | 239                     | 0            | 0          | 0                                | 0               | 0      | 1000  | 305                                         |
| Rajasthan        | 29                             | 828 | 99                      | 19           | 23         | 0                                | 0               | 2      | 1000  | 47                                          |
| Tamil Nadu       | 83                             | 691 | 58                      | 141          | 13         | 3                                | 0               | 11     | 1000  | 188                                         |
| Uttaranchal      | 48                             | 894 | 41                      | 0            | 0          | 0                                | 0               | 18     | 1000  | 571                                         |
| Uttar Pradesh    | 3                              | 407 | 585                     | 0            | 6          | 0                                | 0               | 0      | 1000  | 412                                         |
| West Bengal      | 9                              | 575 | 398                     | 3            | 12         | 0                                | 0               | 3      | 1000  | 621                                         |
| India            | 28                             | 676 | 224                     | 23           | 44         | 2                                | 0               | 3      | 1000  | 375                                         |

## Statement 21.1

Number (per 1000) of persons hospitalised for each broad age-groups in major states

| major state     | rural                |       |       |       |            |     | urban                |       |       |       |            |     |
|-----------------|----------------------|-------|-------|-------|------------|-----|----------------------|-------|-------|-------|------------|-----|
|                 | age group (in years) |       |       |       |            |     | age group (in years) |       |       |       |            |     |
|                 | 0-14                 | 15-29 | 30-44 | 45-59 | 60 & above | all | 0-14                 | 15-29 | 30-44 | 45-59 | 60 & above | all |
| Andhra Pradesh  | 12                   | 19    | 23    | 39    | 46         | 22  | 17                   | 20    | 26    | 51    | 94         | 28  |
| Assam           | 18                   | 24    | 29    | 39    | 108        | 29  | 25                   | 12    | 36    | 32    | 66         | 26  |
| Bihar           | 7                    | 8     | 15    | 16    | 30         | 11  | 10                   | 10    | 15    | 27    | 73         | 16  |
| Chhattisgarh    | 8                    | 11    | 12    | 21    | 16         | 12  | 19                   | 20    | 29    | 47    | 44         | 27  |
| Delhi           | -                    | -     | -     | -     | -          | -   | 5                    | 12    | 6     | 14    | 55         | 11  |
| Gujarat         | 14                   | 24    | 27    | 54    | 78         | 29  | 29                   | 25    | 34    | 47    | 104        | 36  |
| Haryana         | 23                   | 25    | 30    | 57    | 70         | 32  | 18                   | 30    | 30    | 34    | 98         | 31  |
| HP              | 13                   | 25    | 44    | 50    | 66         | 32  | 9                    | 38    | 21    | 69    | 136        | 31  |
| Jammu & Kashmir | 9                    | 4     | 10    | 4     | 4          | 7   | 20                   | 16    | 26    | 27    | 48         | 21  |
| Jharkhand       | 19                   | 20    | 11    | 19    | 9          | 17  | 29                   | 25    | 25    | 27    | 64         | 28  |
| Karnataka       | 19                   | 5     | 7     | 15    | 29         | 13  | 15                   | 12    | 12    | 29    | 0          | 15  |
| Kerala          | 14                   | 21    | 27    | 37    | 36         | 23  | 23                   | 20    | 34    | 47    | 58         | 30  |
| Madhya Pradesh  | 17                   | 27    | 31    | 48    | 63         | 30  | 20                   | 16    | 40    | 45    | 81         | 30  |
| Maharashtra     | 9                    | 16    | 22    | 33    | 40         | 18  | 18                   | 16    | 25    | 35    | 85         | 25  |
| Orissa          | 9                    | 13    | 16    | 25    | 64         | 16  | 10                   | 14    | 19    | 23    | 41         | 16  |
| Punjab          | 6                    | 20    | 20    | 26    | 42         | 17  | 12                   | 16    | 13    | 43    | 41         | 19  |
| Rajasthan       | 7                    | 11    | 20    | 22    | 27         | 13  | 12                   | 16    | 22    | 33    | 70         | 20  |
| Tamil Nadu      | 17                   | 22    | 22    | 28    | 46         | 23  | 24                   | 21    | 30    | 51    | 92         | 35  |
| Uttaranchal     | 44                   | 62    | 48    | 105   | 177        | 65  | 30                   | 29    | 34    | 157   | 131        | 46  |
| Uttar Pradesh   | 16                   | 110   | 15    | 26    | 57         | 48  | 16                   | 17    | 40    | 61    | 112        | 28  |
| West Bengal     | 12                   | 23    | 29    | 71    | 22         | 24  | 45                   | 37    | 7     | 29    | 73         | 34  |
| <b>India</b>    | 12                   | 19    | 25    | 39    | 56         | 23  | 20                   | 21    | 29    | 48    | 91         | 31  |

'-'- indicates, not presented cases.

## Statement 29R

Average medical and other related non-medical expenditure per treated person during 15 days by source of treatment

| major state      | medical expenditure by source of treatment |      |     | other expenditure | total expenditure | Rural                                       |
|------------------|--------------------------------------------|------|-----|-------------------|-------------------|---------------------------------------------|
|                  | Govt.                                      | Pvt. | all |                   |                   | loss of household income per treated person |
| Andhra Pradesh   | 6                                          | 232  | 238 | 24                | 261               | 175                                         |
| Assam            | 14                                         | 212  | 226 | 35                | 261               | 69                                          |
| Bihar            | 42                                         | 263  | 305 | 47                | 351               | 585                                         |
| Chhattisgarh     | 37                                         | 194  | 231 | 32                | 263               | 144                                         |
| Gujarat          | 1                                          | 205  | 206 | 36                | 242               | 85                                          |
| Haryana          | 1                                          | 295  | 296 | 21                | 317               | 77                                          |
| Himachal Pradesh | 4                                          | 366  | 371 | 46                | 417               | 200                                         |
| Jammu & Kashmir  | 13                                         | 340  | 352 | 42                | 394               | 151                                         |
| Jharkhand        | 36                                         | 319  | 356 | 14                | 370               | 121                                         |
| Karnataka        | 4                                          | 271  | 275 | 38                | 313               | 83                                          |
| Kerala           | 3                                          | 179  | 182 | 16                | 198               | 72                                          |
| Madhya Pradesh   | 4                                          | 220  | 225 | 30                | 255               | 96                                          |
| Maharashtra      | 12                                         | 223  | 235 | 31                | 266               | 112                                         |
| Orissa           | 25                                         | 192  | 217 | 21                | 238               | 133                                         |
| Punjab           | 3                                          | 223  | 227 | 14                | 240               | 45                                          |
| Rajasthan        | 4                                          | 386  | 390 | 46                | 436               | 99                                          |
| Tamil Nadu       | 0                                          | 183  | 184 | 24                | 208               | 77                                          |
| Uttaranchal      | 0                                          | 452  | 453 | 98                | 551               | 51                                          |
| Uttar Pradesh    | 10                                         | 326  | 336 | 27                | 363               | 152                                         |
| West Bengal      | 20                                         | 187  | 207 | 17                | 225               | 98                                          |
| India            | 11                                         | 246  | 257 | 27                | 285               | 135                                         |

Statement 29U  
Average medical and other related non-medical expenditure per treated person during 15 days by source of treatment (in Rs.)

| major state      | medical expenditure by source of treatment |      |     | other expenditure | total expenditure | Urban                                       |
|------------------|--------------------------------------------|------|-----|-------------------|-------------------|---------------------------------------------|
|                  | Govt.                                      | Pvt. | all |                   |                   | loss of household income per treated person |
| Andhra Pradesh   | 2                                          | 345  | 347 | 22                | 368               | 124                                         |
| Assam            | 43                                         | 308  | 351 | 34                | 385               | 116                                         |
| Bihar            | 14                                         | 303  | 317 | 55                | 372               | 150                                         |
| Chhattisgarh     | 4                                          | 272  | 276 | 15                | 291               | 66                                          |
| Delhi            | 11                                         | 381  | 392 | 11                | 403               | 78                                          |
| Gujarat          | 1                                          | 398  | 399 | 29                | 428               | 69                                          |
| Haryana          | 1                                          | 276  | 277 | 20                | 298               | 96                                          |
| Himachal Pradesh | 1                                          | 339  | 340 | 14                | 354               | 37                                          |
| Jammu & Kashmir  | 4                                          | 438  | 443 | 35                | 478               | 157                                         |
| Jharkhand        | 8                                          | 377  | 385 | 25                | 410               | 220                                         |
| Karnataka        | 14                                         | 301  | 315 | 20                | 336               | 83                                          |
| Kerala           | 5                                          | 189  | 193 | 13                | 206               | 83                                          |
| Madhya Pradesh   | 3                                          | 320  | 323 | 33                | 356               | 121                                         |
| Maharashtra      | 2                                          | 300  | 302 | 14                | 316               | 61                                          |
| Orissa           | 38                                         | 242  | 280 | 34                | 313               | 887                                         |
| Punjab           | 1                                          | 347  | 348 | 17                | 366               | 125                                         |
| Rajasthan        | 4                                          | 310  | 314 | 15                | 328               | 61                                          |
| Tamil Nadu       | 17                                         | 260  | 277 | 24                | 301               | 48                                          |
| Uttaranchal      | 0                                          | 250  | 250 | 15                | 266               | 16                                          |
| Uttar Pradesh    | 9                                          | 303  | 312 | 22                | 334               | 117                                         |
| West Bengal      | 5                                          | 301  | 306 | 19                | 325               | 77                                          |
| India            | 7                                          | 299  | 306 | 20                | 326               | 96                                          |

Statement 34.1R  
Average medical and total expenditure per hospitalisation case by type of hospital and loss of household income due to hospitalisation in major states  
(in Rs.)

| major state      | medical expenditure by source of treatment |        |        | other expenditure | total expenditure | Rural                    |
|------------------|--------------------------------------------|--------|--------|-------------------|-------------------|--------------------------|
|                  | Govt.                                      | Pvt.   | all    |                   |                   | loss of household income |
| Andhra Pradesh   | 2,176                                      | 6,794  | 5,574  | 663               | 6,237             | 805                      |
| Assam            | 3,157                                      | 8,179  | 4,195  | 502               | 4,697             | 1,025                    |
| Bihar            | 4,998                                      | 6,949  | 6,655  | 758               | 7,413             | 1,008                    |
| Chhattisgarh     | 4,038                                      | 6,086  | 5,003  | 430               | 5,433             | 711                      |
| Gujarat          | 2,253                                      | 6,789  | 5,408  | 449               | 5,857             | 442                      |
| Haryana          | 11,665                                     | 7,147  | 8,006  | 541               | 8,548             | 654                      |
| Himachal Pradesh | 6,035                                      | 14,652 | 7,984  | 883               | 8,867             | 1,893                    |
| Jammu & Kashmir  | 4,463                                      | 10,145 | 4,967  | 698               | 5,666             | 1,377                    |
| Jharkhand        | 2,961                                      | 6,214  | 4,799  | 539               | 5,338             | 1,357                    |
| Karnataka        | 2,610                                      | 7,918  | 5,800  | 471               | 6,271             | 530                      |
| Kerala           | 2,174                                      | 4,565  | 3,717  | 342               | 4,059             | 431                      |
| Madhya Pradesh   | 3,238                                      | 6,185  | 4,486  | 522               | 5,008             | 836                      |
| Maharashtra      | 2,243                                      | 7,094  | 5,709  | 451               | 6,160             | 535                      |
| Orissa           | 3,096                                      | 7,713  | 4,089  | 537               | 4,625             | 582                      |
| Punjab           | 9,774                                      | 13,044 | 12,132 | 623               | 12,755            | 589                      |
| Rajasthan        | 5,464                                      | 9,540  | 7,453  | 840               | 8,294             | 846                      |
| Tamil Nadu       | 637                                        | 8,360  | 5,238  | 537               | 5,775             | 369                      |
| Uttaranchal      | 5,166                                      | 12,544 | 9,486  | 1,245             | 10,731            | 1,224                    |
| Uttar Pradesh    | 7,648                                      | 9,169  | 8,765  | 652               | 9,417             | 920                      |
| West Bengal      | 2,464                                      | 10,339 | 4,149  | 433               | 4,582             | 386                      |
| India            | 3,238                                      | 7,408  | 5,695  | 530               | 6,225             | 636                      |

Statement 34.1U  
Average medical and total expenditure per hospitalisation case by type of hospital and loss of household income due to hospitalisation in major states  
(in Rs.)

| major state      | medical expenditure by source of treatment |        |        | other expenditure | total expenditure | Urban                    |
|------------------|--------------------------------------------|--------|--------|-------------------|-------------------|--------------------------|
|                  | Govt.                                      | Pvt.   | all    |                   |                   | loss of household income |
| Andhra Pradesh   | 1,450                                      | 13,036 | 9,197  | 887               | 10,085            | 1,650                    |
| Assam            | 2,696                                      | 20,048 | 10,467 | 991               | 11,459            | 1,714                    |
| Bihar            | 30,822                                     | 11,807 | 14,674 | 1,033             | 15,708            | 1,566                    |
| Chhattisgarh     | 4,244                                      | 4,359  | 4,317  | 337               | 4,655             | 227                      |
| Delhi            | 3,847                                      | 14,065 | 10,568 | 338               | 10,906            | 504                      |
| Gujarat          | 4,358                                      | 9,448  | 8,303  | 485               | 8,788             | 649                      |
| Haryana          | 20,372                                     | 11,148 | 13,626 | 618               | 14,244            | 828                      |
| Himachal Pradesh | 5,590                                      | 23,447 | 7,649  | 651               | 8,300             | 1,607                    |
| Jammu & Kashmir  | 4,383                                      | 17,822 | 6,122  | 810               | 6,931             | 1,574                    |
| Jharkhand        | 3,716                                      | 8,434  | 7,375  | 602               | 7,977             | 3,971                    |
| Karnataka        | 1,660                                      | 9,837  | 7,552  | 438               | 7,990             | 790                      |
| Kerala           | 2,600                                      | 6,179  | 4,954  | 247               | 5,201             | 578                      |
| Madhya Pradesh   | 2,602                                      | 8,661  | 5,772  | 1,004             | 6,775             | 968                      |
| Maharashtra      | 3,297                                      | 11,618 | 9,776  | 338               | 10,114            | 668                      |
| Orissa           | 4,906                                      | 11,020 | 6,660  | 634               | 7,294             | 713                      |
| Punjab           | 10,323                                     | 19,035 | 16,728 | 807               | 17,535            | 728                      |
| Rajasthan        | 5,590                                      | 10,559 | 7,483  | 528               | 8,012             | 692                      |
| Tamil Nadu       | 1,666                                      | 15,680 | 10,747 | 559               | 11,306            | 367                      |
| Uttaranchal      | 4,083                                      | 19,861 | 14,925 | 513               | 15,438            | 450                      |
| Uttar Pradesh    | 5,144                                      | 10,351 | 8,907  | 342               | 9,250             | 536                      |
| West Bengal      | 4,312                                      | 16,025 | 8,715  | 510               | 9,224             | 529                      |
| India            | 3,877                                      | 11,553 | 8,851  | 516               | 9,367             | 745                      |



## Chapter Four

### Immunisation and Maternity Health Care

#### 4.1 General

4.1.1 As already discussed in Chapter One, the survey results on immunisation and maternity health care services received and expenditure incurred to avail these services have been discussed in this chapter. Information on immunisation was collected through a set of questions for children belonging to the age-group 0-4 years (see block [11] of Schedule 25.0 in Appendix C). The information relating to maternity health care that included pregnancy status, childbirth, ante-natal and post-natal care were collected from the ever married women below 50 years of age.

#### 4.2 Immunisation of Children of Age 0 – 4

4.2.1 *Immunisation Rate:* A child was considered to have received immunisation if he/she had received any of the vaccinations viz. BCG, Measles, DPT (any of the 3 doses), Polio (excluding Polio 0 which is given at the time of birth), Hepatitis vaccine (A or B), MMR, Pneumovax (for Pneumonia) and Oral Typhoid. Statement 36 gives the number per 1000 children of age 0 – 4 yrs. who received any immunisation during the last 365 days. It may be noted that a child who received only a part of an immunisation package was also considered to have received immunisation for the purpose of the survey. It can be seen that 90 per cent of the children had received some immunisation during this period. There is a rural-urban differential of about 5 percentage points in these rates; about 94 per cent of children, in the urban areas, received immunisation as against 89 per cent in the rural areas. This difference is in all probability due to lower availability of adequate health facilities and awareness of the people in rural areas compared to the urban. The estimates, however, do not show any gender differential in the rates. The corresponding estimates of immunisation rate (per 1000) by State are given in Statement 36.1 (p. 49).

| Statement 36                                                           |                                              |       |               |
|------------------------------------------------------------------------|----------------------------------------------|-------|---------------|
| Number (per 1000) children of age 0–4 years receiving any immunisation |                                              |       |               |
|                                                                        |                                              |       | India         |
| gender                                                                 | number (per 1000) receiving any immunisation |       |               |
|                                                                        | rural                                        | urban | rural + urban |
| boys                                                                   | 893                                          | 934   | 902           |
| girls                                                                  | 892                                          | 937   | 900           |
| children                                                               | 892                                          | 936   | 901           |

4.2.2 *Expenditure Incurred on Immunisation and Levels of Living:* Average expenditure incurred by the households for any immunisation of children in the age-group 0–4 years is given for different levels of living in terms of household monthly capita expenditure class in Statement 37. A wide gap in the average expenditure for immunisation of children is noticed between the rural and urban areas. On an average, around Rs. 20 was spent for immunisation of a rural child and Rs. 113, nearly 6 times as much for an urban child. The reason could be that although the government provides free immunisation services in both rural and urban areas, there is a preference among a sizeable section of the urban population to rely on private doctors, known to them recommended by others, for immunisation of their children. This phenomenon may also be there in the case of relatively richer households in the rural areas. It is interesting to note the gender differential in the expenditure on immunisation in both the rural and urban areas. While in

the rural areas, the people spent more money on immunisation of a male child than a girl child, it was the reverse in the urban areas, with the exception in the lowest expenditure class. The state-level estimates on average expenditure are given in Statement 37.1 (p.50). The rate of immunisation is also found to be very high in both the sectors of all the states.

Statement 37

Average expenditure per child of age 0 – 4 years on immunisation in each household MPCE class

|                      |                                           | India |          |                      |                                           |       |          |
|----------------------|-------------------------------------------|-------|----------|----------------------|-------------------------------------------|-------|----------|
|                      |                                           | Rural |          |                      | Urban                                     |       |          |
| MPCE classes (Rs.)   | average expenditure on immunisation (Rs.) |       |          | MPCE classes (Rs.)   | average expenditure on immunisation (Rs.) |       |          |
|                      | boys                                      | girls | children |                      | boys                                      | girls | children |
| <i>less than 225</i> | 4.1                                       | 5.2   | 4.7      | <i>less than 300</i> | 36.9                                      | 6.2   | 21.4     |
| 225 – 255            | 12.1                                      | 11.5  | 11.8     | 300 – 350            | 18.2                                      | 19.5  | 18.8     |
| 255 – 300            | 12.0                                      | 12.9  | 12.4     | 350 – 425            | 26.8                                      | 12.4  | 20.2     |
| 300 – 340            | 8.8                                       | 9.5   | 9.1      | 425 – 500            | 18.0                                      | 19.5  | 18.8     |
| 340 – 380            | 9.5                                       | 13.3  | 11.3     | 500 – 575            | 42.6                                      | 26.0  | 34.5     |
| 380 – 420            | 17.6                                      | 12.2  | 14.9     | 575 – 665            | 41.1                                      | 65.0  | 52.2     |
| 420 – 470            | 15.0                                      | 17.8  | 16.4     | 665 – 775            | 67.0                                      | 65.5  | 66.3     |
| 470 – 525            | 25.9                                      | 17.7  | 21.8     | 775 – 915            | 85.3                                      | 104.5 | 94.0     |
| 525 – 615            | 31.0                                      | 20.5  | 26.0     | 915 – 1120           | 178.6                                     | 148.2 | 165.2    |
| 615 – 775            | 34.0                                      | 28.5  | 31.4     | 1120 – 1500          | 207.5                                     | 359.6 | 275.6    |
| 775 – 950            | 79.9                                      | 53.1  | 68.7     | 1500 – 1925          | 389.8                                     | 447.7 | 414.6    |
| 950 or more          | 142.0                                     | 93.7  | 120.6    | 1925 or more         | 615.8                                     | 796.2 | 686.6    |
| <i>all</i>           | 22.3                                      | 17.4  | 19.9     | <i>all</i>           | 109.2                                     | 118.3 | 113.4    |

### 4.3 Incidence of Pregnancy, Childbirth and Maternity Care

4.3.1 *Incidence of pregnancy of women of age 15-49 years and loss of pregnancy:* In order to provide estimates of expenditure for antenatal and post-natal care of women of age 15-49 years and expenditure on childbirth, information on the relevant aspects was collected for latest case of pregnancy of women any time during a period of 365 days preceding the date of survey and importantly, from those among them who had given birth. Estimates on proportion of women who were pregnant any time (WPAT) during the 365 days prior to the date of survey and 'wastage of pregnancy' (per 1000) are given in Statement 38 for five-year age groups of women. Wastage of pregnancy (WOP) is defined as the ratio of 'total number of pregnancies which did not result into childbirth during the reference period' and 'total number of pregnancies during the same period'. In deriving this indicator, one needs to know - if a woman was pregnant anytime during a reference period, and if so, number of times pregnant during that period and the number of childbirths given during that period. In this survey, information in respect of 'number of times pregnant during that period' was not collected. If we assume that women who were pregnant during anytime during the reference period (365 days preceding the date of interview) were pregnant only once, we can approximate WOP from the survey data. The statement also gives the distribution of childbirth by place of birth (home/govt. hospital/private hospital). It may be noted that for calculation of 'wastage of pregnancy', it is assumed that the women who were pregnant during the reference period were pregnant once only as the number of pregnancies was not recorded for them by the survey. In that sense, the estimate of 'wastage of pregnancy' is assumed to be the crude one. It can be seen that among women in the age group 15-49 years, about 13 per cent of in the rural areas and 11 per cent in the urban areas were pregnant during the 365 days preceding the date of

survey. It is important to note that these rates are much lower than the birth rates in the rural and urban areas of the country.

This suggests that there was, perhaps, a gross under-reporting of the events of pregnancy in both the sectors. However, the incidence of pregnancy is found to be highest, as expected, in the age group 20-24 years – the rate being 29 (rural) to 32 (urban) per cent. The incidence of pregnancy diminishes as the age of women advances gradually to 49 years, and is found to reach 1 per cent only in the terminating age group. Secondly, about 72 per cent of the pregnant women in the rural areas delivered a child, while about 69 per cent did so in the urban areas. In other words, about 28 per cent of the pregnancies were wasted in the rural areas, and the percentage was a little higher in the urban areas (31 per cent). Wastage of pregnancy is highest in the age group 15-19 years, and it gradually decreases with the advance of age. Another point may be noted that the rate is, in general, higher for all the age groups in urban areas than that in rural areas. It may be noted that the number of sample count reporting pregnancy in the last two age groups was very small and hence the estimates may not be reliable.

4.3.2 *Institutional Childbirth*: Statement 39 also gives the distribution of childbirth by

Statement 38

Number (per 1000) of women aged 15 – 49 years who were pregnant any time during last 365 days (WPAT), per 1000 wastage of pregnancy (WOP) and per 1000 distribution of childbirth by place of delivery for each broad age group

| India              |            |            |                                                      |            |            |
|--------------------|------------|------------|------------------------------------------------------|------------|------------|
| age group          | WPAT       | WOP        | per 1000 distri. of child-birth by place of delivery |            |            |
|                    |            |            | govt. hosp.                                          | pvt. hosp. | home       |
| <b>rural</b>       |            |            |                                                      |            |            |
| 15-19              | 250        | 377        | 220                                                  | 175        | 605        |
| 20-24              | 289        | 279        | 196                                                  | 197        | 607        |
| 25-29              | 174        | 288        | 194                                                  | 162        | 645        |
| 30-34              | 99         | 236        | 156                                                  | 143        | 702        |
| 35-39              | 45         | 270        | 85                                                   | 62         | 853        |
| 40-44              | 19         | 257        | 135                                                  | 90         | 775        |
| 45-49              | 14         | 239        | 57                                                   | 83         | 861        |
| <b>all</b>         | <b>127</b> | <b>284</b> | <b>182</b>                                           | <b>166</b> | <b>652</b> |
| <b>urban</b>       |            |            |                                                      |            |            |
| 15-19              | 293        | 445        | 332                                                  | 382        | 286        |
| 20-24              | 323        | 310        | 328                                                  | 404        | 268        |
| 25-29              | 177        | 288        | 309                                                  | 485        | 206        |
| 30-34              | 69         | 267        | 262                                                  | 462        | 276        |
| 35-39              | 23         | 290        | 262                                                  | 332        | 406        |
| 40-44              | 6          | 304        | 75                                                   | 164        | 761        |
| 45-49              | 6          | 244        | 639                                                  | 303        | 58         |
| <b>all</b>         | <b>107</b> | <b>306</b> | <b>311</b>                                           | <b>429</b> | <b>259</b> |
| <b>rural+urban</b> |            |            |                                                      |            |            |
| 15-19              | 256        | 387        | 237                                                  | 204        | 560        |
| 20-24              | 296        | 286        | 225                                                  | 245        | 529        |
| 25-29              | 175        | 288        | 222                                                  | 240        | 538        |
| 30-34              | 91         | 242        | 175                                                  | 202        | 623        |
| 35-39              | 39         | 272        | 114                                                  | 106        | 780        |
| 40-44              | 15         | 263        | 128                                                  | 99         | 773        |
| 45-49              | 11         | 240        | 138                                                  | 113        | 749        |
| <b>all</b>         | <b>122</b> | <b>289</b> | <b>210</b>                                           | <b>222</b> | <b>568</b> |

Statement 39

Per 1000 distribution of childbirth by place of delivery during 2004 and 1995-96

| India                  |                          |                             |                             |                          |                             |                             |
|------------------------|--------------------------|-----------------------------|-----------------------------|--------------------------|-----------------------------|-----------------------------|
| place of delivery      | rural                    |                             |                             | urban                    |                             |                             |
|                        | 2004 (60 <sup>th</sup> ) | 1995-96 (52 <sup>nd</sup> ) | 1986-87 (42 <sup>nd</sup> ) | 2004 (60 <sup>th</sup> ) | 1995-96 (52 <sup>nd</sup> ) | 1986-87 (42 <sup>nd</sup> ) |
| Govt. hospital         | 183                      | -                           | 89                          | 310                      | -                           | 290                         |
| private hospital       | 166                      | -                           | 46                          | 429                      | -                           | 192                         |
| hospital               | 359                      | 179                         | 135                         | 739                      | 594                         | 482                         |
| home*                  | 651                      | 787                         | 805                         | 261                      | 384                         | 468                         |
| <b>all<sup>#</sup></b> | <b>1000</b>              | <b>1000</b>                 | <b>1000</b>                 | <b>1000</b>              | <b>1000</b>                 | <b>1000</b>                 |

\* include 'other places', other than 'hospital' for NSS 52<sup>nd</sup> Round.

# include 'not recorded' cases in NSS 52<sup>nd</sup> and 42<sup>nd</sup> rounds.

place of delivery separately for the rural and urban areas at the all India level. In the rural areas, about 65 per cent of the childbirths were non-institutional, that is, at home or any other place other than the hospitals. At the other end, the proportion of non-institutional childbirths was 26 per cent in

the urban areas. The share of govt. hospitals in the case of institutional births was 31 per cent in the urban areas and only 18 per cent in the rural areas. This share, for the country as whole was 21 per cent (see Statement 38). The increase in the share of the institutional childbirth had been phenomenal. In the rural areas, it increased from 14 per cent in 1986-87 to 18 per cent in 1995-96 and subsequently to 36 per cent in 2004; while the increase, in the urban areas, was from 48 per cent to 59 per cent during the period from 1986-87 to 1995-96, and from 59 per cent to 74 per cent during the period from 1995-96 to 2004. A sharp rise in the share of private institutions in childbirth can also be seen during 1986-87 and 2004 – increased from 5 to 17 per cent in the rural areas and 19 to 43 per cent in the urban areas.

4.3.3 *Expenditure on Childbirth during the last 365 days*: Statement 40 gives the expenditure incurred per childbirth separately for the rural and urban areas. An average of Rs. 1,521 was spent per childbirth during January-June, 2004.

There was a perceptible difference in the expenditure incurred for childbirth between the rural and urban areas. For childbirth, this amount was Rs. 1,169 and Rs. 2,806 in the rural and urban, respectively. Again, the cost of a child delivery in private hospital was as high as Rs. 4,692 as compared to Rs. 1,111 in a government hospital. On the other hand, the average cost for delivery of a child at home was only Rs. 428 – the expenditure being Rs. 414 in the rural areas and Rs. 552 in the urban areas. It

may be noted that the average expenditure per childbirth was higher in the rural govt. hospital (Rs. 1,165) than their urban counterpart (Rs. 994). Although the instructions were to record the total expenditure on childbirth, including expenditure incurred on treatment of any complication

Statement 40

Average expenditure (Rs.) per childbirth by place of delivery

| sector      | India                                   |            |      |       |
|-------------|-----------------------------------------|------------|------|-------|
|             | average expenditure on childbirth (Rs.) |            |      |       |
|             | govt. hosp.                             | pvt. hosp. | home | all   |
| rural       | 1,165                                   | 4,137      | 414  | 1,169 |
| urban       | 994                                     | 5,480      | 552  | 2,806 |
| rural+urban | 1,111                                   | 4,692      | 428  | 1,519 |

Statement 41

Number (per 1000) of women\* who availed antenatal care services (PWANC), post-natal care services (PWPNC) and proportion of these services availed from government and private sources

| sector | India                 |        |      |                        |        |      |
|--------|-----------------------|--------|------|------------------------|--------|------|
|        | PWANC                 | source |      | PWANC                  | source |      |
|        |                       | govt.  | pvt. |                        | govt.  | pvt. |
|        | <b>antenatal care</b> |        |      | <b>post-natal care</b> |        |      |
| rural  | 698                   | 609    | 391  | 626                    | 449    | 551  |
| urban  | 836                   | 462    | 538  | 729                    | 422    | 578  |

\* aged 15 – 49 years & pregnant anytime during the last 365 days

arising at the time of childbirth, it is possible that all other expenditures made in connection with the childbirth, such as, those on travelling, lodging, etc., had also been included while reporting this item, and the rural mothers might have incurred more of such expenditure than the urban mothers due to non-availability of adequate health infrastructure in the rural areas. The corresponding estimate for the major states is given in Statement 40.1 (p. 51).

4.3.4 *Antenatal and Post-natal care – by Source*: Information on maternal care taken by women who were pregnant anytime during the last 365 days was collected in the survey together with the

expenditure incurred for availing ante-natal and post-natal services. Statement 41 gives the proportion of such women availing these services by the source of availing such services. It is seen that about 70 per cent of pregnant women had taken some antenatal care in the rural areas, and the proportion was much higher -- 84 per cent -- in the urban areas. Compared to the antenatal care, on the other hand, the incidence of availing services for post-natal care was not very common among the women giving childbirth, both in the rural as well as in the urban areas. About 63 per cent in the rural areas and 73 per cent in the urban areas availed of some post-natal care services. Important to note that the private institutions played a major role in providing the maternal care services except in the case of antenatal care services in the rural areas, where the govt. institutions played a dominant role.

4.3.5 *Expenditure incurred for availing Maternity Care*: The expenditure incurred for availing maternity care services from different sources is given in Statement 42. Expenditure involved in the case of availing of antenatal care services was more than that of the post-natal care services, irrespective of whether the women resided in the rural or urban area. For a woman, average expenditure on antenatal and post-natal care was, respectively, Rs. 499 and Rs. 404 in the rural areas. The corresponding values in the urban areas were Rs. 906 and Rs. 596. As expected, the antenatal and post-natal care services were found to be much more expensive in the private sources as compared to the government sources. This differential is sharper in the case of antenatal care in the urban areas.

Statement 42

Average expenditure (Rs.) on antenatal care services (ANC), post-natal care services (PNC) by women\* by source of service for each broad age group

| sector       | India                                   |      |     |                                         |      |     |
|--------------|-----------------------------------------|------|-----|-----------------------------------------|------|-----|
|              | average expenditure on ANC from sources |      |     | average expenditure on PNC from sources |      |     |
|              | govt.                                   | pvt. | all | govt.                                   | pvt. | all |
| <b>rural</b> | 230                                     | 918  | 499 | 232                                     | 541  | 402 |
| <b>urban</b> | 356                                     | 1377 | 905 | 367                                     | 762  | 595 |

\* aged 15 – 49 years & pregnant anytime during the last 365 days

4.3.6 *State level Estimates of PWANC and PWPNC*: The estimates of PWANC, PWPNC and share of public sources and average expenditure for availing these services are given in Statements 42.1R and 42.1U (pp 52-53) for the rural and urban areas. The proportion of women availing antenatal and post-natal care services were the highest in Kerala, followed by Tamil Nadu and Karnataka in the rural areas. states where proportionately more women availed both the antenatal and post-natal care services from government sources were Himachal Pradesh, Jammu & Kashmir and Chhattisgarh.



## Statement 36.1

Percentage of children of age 0 – 4 years receiving immunisation in each major state

| major state      | percentage receiving any immunisation |       |          |       |       |          |               |       |          |
|------------------|---------------------------------------|-------|----------|-------|-------|----------|---------------|-------|----------|
|                  | rural                                 |       |          | urban |       |          | rural + urban |       |          |
|                  | boys                                  | girls | children | boys  | girls | children | boys          | girls | children |
| Andhra Pradesh   | 97                                    | 95    | 96       | 96    | 96    | 96       | 97            | 95    | 96       |
| Assam            | 84                                    | 86    | 85       | 88    | 93    | 90       | 85            | 86    | 85       |
| Bihar            | 80                                    | 78    | 79       | 87    | 92    | 89       | 81            | 79    | 80       |
| Chhattisgarh     | 91                                    | 87    | 89       | 97    | 98    | 98       | 91            | 88    | 90       |
| Delhi            | -                                     | -     | -        | 94    | 93    | 94       | -             | -     | -        |
| Gujarat          | 90                                    | 92    | 91       | 95    | 98    | 96       | 92            | 94    | 93       |
| Haryana          | 84                                    | 86    | 85       | 96    | 98    | 96       | 87            | 89    | 87       |
| Himachal Pradesh | 94                                    | 93    | 94       | 89    | 83    | 86       | 94            | 92    | 93       |
| Jammu & Kashmir  | 97                                    | 95    | 96       | 94    | 95    | 95       | 97            | 95    | 96       |
| Jharkhand        | 88                                    | 86    | 87       | 87    | 87    | 87       | 88            | 87    | 87       |
| Karnataka        | 98                                    | 98    | 98       | 98    | 97    | 97       | 98            | 98    | 98       |
| Kerala           | 93                                    | 96    | 95       | 95    | 97    | 96       | 94            | 96    | 95       |
| Madhya Pradesh   | 88                                    | 89    | 88       | 89    | 92    | 90       | 88            | 90    | 89       |
| Maharashtra      | 96                                    | 95    | 96       | 98    | 97    | 97       | 97            | 96    | 96       |
| Orissa           | 94                                    | 94    | 94       | 100   | 98    | 99       | 95            | 95    | 95       |
| Punjab           | 98                                    | 91    | 94       | 90    | 86    | 88       | 95            | 90    | 92       |
| Rajasthan        | 93                                    | 91    | 92       | 96    | 95    | 95       | 94            | 91    | 93       |
| Tamil Nadu       | 97                                    | 98    | 98       | 96    | 96    | 96       | 97            | 97    | 97       |
| Uttaranchal      | 92                                    | 99    | 94       | 99    | 100   | 100      | 93            | 99    | 95       |
| Uttar Pradesh    | 84                                    | 86    | 85       | 88    | 87    | 88       | 85            | 86    | 86       |
| West Bengal      | 93                                    | 92    | 93       | 93    | 95    | 94       | 93            | 92    | 93       |
| India            | 89                                    | 89    | 89       | 93    | 94    | 94       | 90            | 90    | 90       |

'-' indicates, not presented cases.



## Statement 37.1

Average expenditure on immunisation per child of age 0 – 4 years receiving immunisation on immunisation in each major state

(in Rs.)

| major state      | average expenditure on immunisation per child (Rs.) |       |          |       |       |          |               |       |          |
|------------------|-----------------------------------------------------|-------|----------|-------|-------|----------|---------------|-------|----------|
|                  | rural                                               |       |          | urban |       |          | rural + urban |       |          |
|                  | boys                                                | girls | children | boys  | girls | children | boys          | girls | children |
| Andhra Pradesh   | 35                                                  | 37    | 36       | 80    | 102   | 90       | 46            | 53    | 50       |
| Assam            | 16                                                  | 33    | 25       | 116   | 229   | 172      | 24            | 45    | 35       |
| Bihar            | 30                                                  | 34    | 32       | 136   | 96    | 119      | 40            | 39    | 39       |
| Chhattisgarh     | 8                                                   | 13    | 10       | 57    | 52    | 54       | 14            | 18    | 16       |
| Delhi            | -                                                   | -     | -        | 359   | 340   | 351      | -             | -     | -        |
| Gujarat          | 12                                                  | 7     | 9        | 148   | 175   | 160      | 56            | 53    | 55       |
| Haryana          | 35                                                  | 12    | 24       | 86    | 57    | 74       | 48            | 22    | 36       |
| Himachal Pradesh | 4                                                   | 22    | 13       | 1     | 44    | 20       | 4             | 24    | 14       |
| Jammu & Kashmir  | 47                                                  | 26    | 36       | 147   | 121   | 135      | 63            | 38    | 51       |
| Jharkhand        | 24                                                  | 23    | 23       | 129   | 130   | 129      | 37            | 32    | 35       |
| Karnataka        | 20                                                  | 21    | 21       | 64    | 65    | 64       | 33            | 32    | 33       |
| Kerala           | 53                                                  | 47    | 50       | 119   | 137   | 128      | 67            | 68    | 68       |
| Madhya Pradesh   | 9                                                   | 7     | 8        | 58    | 40    | 49       | 19            | 13    | 16       |
| Maharashtra      | 45                                                  | 9     | 28       | 149   | 214   | 179      | 82            | 81    | 81       |
| Orissa           | 7                                                   | 5     | 6        | 68    | 22    | 46       | 14            | 7     | 10       |
| Punjab           | 44                                                  | 25    | 34       | 97    | 80    | 90       | 62            | 39    | 51       |
| Rajasthan        | 3                                                   | 5     | 4        | 16    | 21    | 18       | 5             | 8     | 7        |
| Tamil Nadu       | 47                                                  | 20    | 34       | 121   | 127   | 124      | 71            | 56    | 64       |
| Uttaranchal      | 12                                                  | 7     | 10       | 95    | 287   | 172      | 23            | 47    | 33       |
| Uttar Pradesh    | 12                                                  | 10    | 11       | 56    | 69    | 62       | 19            | 20    | 19       |
| West Bengal      | 6                                                   | 16    | 11       | 162   | 128   | 147      | 37            | 34    | 35       |
| India            | 22                                                  | 17    | 20       | 109   | 118   | 113      | 41            | 37    | 39       |

'- indicates, not presented cases.

## Statement 40.1

Average expenditure per childbirth (Rs.) by place of delivery in major states

(in Rs.)

| major state      | rural             |                  |      |       | urban             |                  |      |       |
|------------------|-------------------|------------------|------|-------|-------------------|------------------|------|-------|
|                  | place of delivery |                  |      |       | place of delivery |                  |      |       |
|                  | Govt.<br>hospital | Pvt.<br>hospital | home | all   | Govt.<br>hospital | Pvt.<br>hospital | home | all   |
| Andhra Pradesh   | 885               | 3,082            | 354  | 1,519 | 744               | 5,142            | 197  | 2,781 |
| Assam            | 1,252             | 1,906            | 348  | 754   | 1,003             | 6,651            | 100  | 3,063 |
| Bihar            | 2,327             | 2,187            | 407  | 677   | 1,443             | 1,813            | 418  | 1,144 |
| Chhattisgarh     | 678               | 3,342            | 320  | 431   | 1,213             | 3,784            | 550  | 2,049 |
| Delhi            | -                 | -                | -    | -     | 889               | 5,484            | 790  | 1,389 |
| Gujarat          | 1,415             | 3,221            | 385  | 1,329 | 499               | 4,803            | 389  | 3,067 |
| Haryana          | 2,786             | 5,240            | 400  | 1,671 | 1,096             | 4,520            | 507  | 2,351 |
| Himachal Pradesh | 3,437             | 7,833            | 737  | 2,752 | 430               | 8,226            | 650  | 1,691 |
| Jammu & Kashmir  | 1,401             | *                | 775  | 1,059 | 919               | 7,345            | 478  | 1,663 |
| Jharkhand        | 660               | 1,446            | 333  | 515   | 2,007             | 5,208            | 992  | 4,096 |
| Karnataka        | 340               | 4,141            | 195  | 1,305 | 483               | 6,937            | 319  | 3,152 |
| Kerala           | 2,088             | 6,391            | *    | 4,983 | 1,686             | 6,172            | *    | 4,906 |
| Madhya Pradesh   | 1,626             | 7,186            | 422  | 1,285 | 905               | 5,624            | 534  | 2,583 |
| Maharashtra      | 633               | 2,756            | 320  | 1,028 | 828               | 5,995            | 364  | 3,930 |
| Orissa           | 1,603             | 2,266            | 165  | 609   | 1,046             | 6,931            | 368  | 1,475 |
| Punjab           | 3,342             | 5,770            | 862  | 3,269 | 2,352             | 5,806            | 459  | 2,308 |
| Rajasthan        | 1,714             | 3,448            | 444  | 901   | 2,870             | 6,345            | 899  | 3,668 |
| Tamil Nadu       | 482               | 5,199            | 202  | 1,992 | 374               | 6,744            | 543  | 3,434 |
| Uttaranchal      | 1,192             | 2,000            | 322  | 391   | 1,393             | 6,638            | 274  | 1,234 |
| Uttar Pradesh    | 1,725             | 4,008            | 505  | 856   | 1,688             | 4,361            | 643  | 1,851 |
| West Bengal      | 827               | 4,370            | 342  | 971   | 1,060             | 6,551            | 436  | 2,386 |
| India            | 1,165             | 4,137            | 414  | 1,169 | 994               | 5,480            | 552  | 2,806 |

'-' indicates, not presented cases.; \* no sample

## Statement 42.1R

Number (per 1000) of women\* who availed (i) antenatal care services (PWANC), (ii) post-natal care services (PWPNC), (iii) proportion of these services availed from government (per 1000) and (iv) average expenditure (Rs. 0.0) on antenatal care services (ANC), post-natal care services (PNC) by women\* by source of service for each major state in rural areas

Rural

| major state      | number per 1000 of women* availing |                             |                    |      |      |                          |                             |                    |      |      |
|------------------|------------------------------------|-----------------------------|--------------------|------|------|--------------------------|-----------------------------|--------------------|------|------|
|                  | antenatal care services            |                             |                    |      |      | post-natal care services |                             |                    |      |      |
|                  | PWANC                              | services from govt. sources | average exp. (Rs.) |      |      | PWPNC                    | services from govt. sources | average exp. (Rs.) |      |      |
|                  |                                    | govt.                       | pvt.               | all  |      |                          | govt.                       | pvt.               | all  |      |
| Andhra Pradesh   | 906                                | 518                         | 407                | 1446 | 907  | 719                      | 455                         | 220                | 476  | 360  |
| Assam            | 753                                | 753                         | 167                | 624  | 280  | 703                      | 576                         | 306                | 401  | 347  |
| Bihar            | 530                                | 174                         | 408                | 473  | 462  | 524                      | 198                         | 238                | 339  | 319  |
| Chhattisgarh     | 695                                | 822                         | 94                 | 341  | 138  | 574                      | 662                         | 132                | 151  | 139  |
| Gujarat          | 763                                | 674                         | 61                 | 1872 | 651  | 503                      | 528                         | 139                | 1781 | 915  |
| Haryana          | 801                                | 754                         | 186                | 876  | 356  | 453                      | 327                         | 244                | 1245 | 919  |
| Himachal Pradesh | 922                                | 920                         | 437                | 1912 | 557  | 739                      | 881                         | 531                | 742  | 556  |
| Jammu & Kashmir  | 772                                | 830                         | 811                | 878  | 822  | 583                      | 731                         | 535                | 553  | 540  |
| Jharkhand        | 523                                | 412                         | 258                | 293  | 278  | 586                      | 376                         | 104                | 179  | 151  |
| Karnataka        | 876                                | 697                         | 113                | 948  | 366  | 796                      | 647                         | 178                | 447  | 273  |
| Kerala           | 958                                | 294                         | 1337               | 1492 | 1446 | 873                      | 297                         | 784                | 1388 | 1209 |
| Madhya Pradesh   | 574                                | 758                         | 214                | 1189 | 450  | 580                      | 656                         | 308                | 589  | 405  |
| Maharashtra      | 809                                | 587                         | 142                | 1246 | 598  | 609                      | 482                         | 115                | 485  | 307  |
| Orissa           | 775                                | 826                         | 186                | 752  | 284  | 738                      | 670                         | 246                | 421  | 304  |
| Punjab           | 711                                | 520                         | 930                | 1631 | 1267 | 567                      | 443                         | 658                | 587  | 618  |
| Rajasthan        | 706                                | 807                         | 292                | 883  | 406  | 570                      | 479                         | 548                | 864  | 713  |
| Tamil Nadu       | 954                                | 711                         | 116                | 1730 | 583  | 775                      | 697                         | 63                 | 596  | 224  |
| Uttaranchal      | 557                                | 801                         | 47                 | 1258 | 289  | 231                      | 188                         | 661                | 98   | 204  |
| Uttar Pradesh    | 544                                | 537                         | 109                | 556  | 316  | 642                      | 277                         | 175                | 395  | 334  |
| West Bengal      | 890                                | 670                         | 262                | 622  | 381  | 661                      | 551                         | 130                | 341  | 225  |
| India            | 698                                | 609                         | 230                | 918  | 499  | 626                      | 449                         | 232                | 541  | 402  |

\* women aged 15 – 59 years who were pregnant anytime during the last 365 days

## Statement 42.1U

Number (per 1000) of women\* who availed (i) antenatal care services (PWANC), (ii) post-natal care services (PWPNC), (iii) proportion of these services availed from government (per 1000) and (iv) average expenditure (Rs. 0.0) on antenatal care services (ANC), post-natal care services (PNC) by women\* by source of service for each major state in urban areas

Urban

| major state      | number per 1000 of women* availing |                             |                    |      |      |                     |                             |                             |      |      |
|------------------|------------------------------------|-----------------------------|--------------------|------|------|---------------------|-----------------------------|-----------------------------|------|------|
|                  | antenatal services                 |                             |                    |      |      | post-natal services |                             |                             |      |      |
|                  | PWANC                              | services from govt. sources | average exp. (Rs.) |      |      | PWPNC               | services from govt. sources | services from govt. sources |      |      |
|                  |                                    |                             | govt.              | pvt. | all  |                     |                             | govt.                       | pvt. | all  |
| Andhra Pradesh   | 925                                | 347                         | 630                | 1614 | 1272 | 820                 | 377                         | 341                         | 533  | 460  |
| Assam            | 1000                               | 447                         | 412                | 687  | 564  | 953                 | 666                         | 503                         | 1663 | 889  |
| Bihar            | 753                                | 80                          | 266                | 603  | 576  | 724                 | 78                          | 522                         | 344  | 358  |
| Chhattisgarh     | 872                                | 596                         | 122                | 734  | 369  | 580                 | 487                         | 100                         | 643  | 379  |
| Delhi            | 801                                | 605                         | 412                | 1605 | 883  | 809                 | 677                         | 379                         | 1066 | 600  |
| Gujarat          | 882                                | 426                         | 337                | 1568 | 1043 | 693                 | 344                         | 243                         | 955  | 710  |
| Haryana          | 825                                | 464                         | 306                | 1141 | 754  | 547                 | 417                         | 263                         | 1303 | 869  |
| Himachal Pradesh | 1000                               | 885                         | 127                | 859  | 211  | 877                 | 642                         | 130                         | 291  | 188  |
| Jammu & Kashmir  | 911                                | 629                         | 627                | 2332 | 1259 | 821                 | 504                         | 402                         | 1893 | 1142 |
| Jharkhand        | 911                                | 168                         | 419                | 841  | 770  | 903                 | 200                         | 500                         | 421  | 436  |
| Karnataka        | 920                                | 634                         | 293                | 1271 | 651  | 766                 | 625                         | 236                         | 867  | 473  |
| Kerala           | 976                                | 290                         | 1163               | 1905 | 1690 | 830                 | 336                         | 1614                        | 1331 | 1426 |
| Madhya Pradesh   | 790                                | 597                         | 334                | 1180 | 675  | 757                 | 658                         | 411                         | 980  | 608  |
| Maharashtra      | 863                                | 286                         | 341                | 1636 | 1266 | 763                 | 304                         | 314                         | 779  | 638  |
| Orissa           | 889                                | 893                         | 617                | 916  | 649  | 601                 | 831                         | 137                         | 1540 | 373  |
| Punjab           | 555                                | 686                         | 384                | 2282 | 979  | 574                 | 729                         | 682                         | 786  | 710  |
| Rajasthan        | 874                                | 577                         | 586                | 1687 | 1052 | 698                 | 383                         | 911                         | 1805 | 1463 |
| Tamil Nadu       | 986                                | 566                         | 126                | 1739 | 826  | 744                 | 542                         | 130                         | 732  | 406  |
| Uttaranchal      | 908                                | 911                         | 204                | 1594 | 329  | 278                 | 495                         | 119                         | 337  | 229  |
| Uttar Pradesh    | 640                                | 448                         | 225                | 665  | 468  | 710                 | 321                         | 282                         | 464  | 406  |
| West Bengal      | 943                                | 573                         | 379                | 1332 | 786  | 690                 | 493                         | 423                         | 589  | 507  |
| India            | 836                                | 462                         | 356                | 1377 | 905  | 729                 | 422                         | 367                         | 762  | 595  |

\* women aged 15 – 59 years who were pregnant anytime during the last 365 days

## Chapter Five

### Condition and Health Care of the Aged

#### 5.1 General

5.1.1 The results relating to the condition and health care of persons aged 60 and above, to be referred to as the aged persons, have been placed and discussed in this Chapter. The results are based on the information collected in the field through a particular module of the survey schedule (see block [6] of Schedule 25.0 given in Appendix C).

5.1.2 As mentioned earlier, one of the objectives of collecting information through this survey was to assess the structure and composition of the aged in respect of age, sex, dependency ratio, etc. and the conditions of the aged in respect of their economic dependency, number of dependants, living arrangements, persons supporting the aged, physical immobility, etc. In the survey, those who were of age 60 years and above were considered aged. Information on number of surviving children, living arrangement, economic independence, number of dependants, persons supporting the aged, etc., was collected for the aged. The results obtained from the survey are presented in this section. The main findings of the survey are discussed at the all-India level. Similar estimates obtained from the earlier survey carried out during 1995-96 (NSS 52<sup>nd</sup> round), wherever possible, are also placed side by side to give an idea about the changes over this period.

| Statement 43<br>Share (per 1000) of the aged to total population obtained from NSS surveys and population censuses for each sex |       |        |        |       |        |        |
|---------------------------------------------------------------------------------------------------------------------------------|-------|--------|--------|-------|--------|--------|
|                                                                                                                                 |       |        |        |       |        | India  |
| source                                                                                                                          | rural |        |        | urban |        |        |
|                                                                                                                                 | male  | female | person | male  | female | person |
| Census 1981                                                                                                                     | 68    | 68     | 68     | 51    | 58     | 54     |
| NSS 43rd round (1987-88)                                                                                                        | 65    | 66     | 65     | 54    | 61     | 57     |
| Census 1991                                                                                                                     | 78    | 74     | 76     | 62    | 66     | 63     |
| NSS 50th round (1993-94)                                                                                                        | 68    | 69     | 69     | 55    | 64     | 60     |
| NSS 52nd round (1995-96)                                                                                                        | 55    | 59     | 57     | 47    | 53     | 50     |
| Census 2001                                                                                                                     | 74    | 81     | 77     | 62    | 72     | 67     |
| NSS 60 <sup>th</sup> round (Jan-Jun, 2004)                                                                                      | 70    | 71     | 70     | 62    | 71     | 66     |

5.1.3 *Demographic Burden:* It is found from the survey results that of the estimated 66.4 million aged persons in the country, about 75 per cent were residing in the rural areas and remaining 25 per cent in the urban areas. Their magnitude, either in terms of number or share to total population is found to rise gradually. The proportion of aged persons, which was 6.5 per cent (43.5 million) in 1981 (as per Population Census), grew to 6.8 per cent (61.4 million) in 1991 and 7.4 per cent (76.6 million) in 2001. Although the number of aged persons obtained from the present survey, was lower than even that of Census 2001, its magnitude in terms of proportion in the total population was fairly close to that of Census. More importantly, the two sets of

estimates of proportions of the aged, obtained from the surveys and census, reveal similar trend over the time points, except that from NSS 52<sup>nd</sup> round. Perhaps, there has possibly been some problem of bias in age reporting in that round. This apart, the survey has also revealed that the concentration of aged in terms of its share to total population tends to be higher in the rural areas than in the urban areas - the share being 7.0 and 6.6 per cent, respectively, which is again supported by the Census estimates, as given in Statement 43. Male-female and rural-urban differences in the proportion of aged persons are found to exist and the differences are significant. The share of the aged females was higher than that of the aged males in the urban areas and almost the same in the rural areas. This fact reflects the higher expectancy of life for females and probably the out-migration of the males in the working age groups from the rural areas. The corresponding estimates for major states are given in Statement 43.1 (p 61).

**5.1.4 Old-age Dependency Ratio:** It measures the responsibilities of the aged to the working-age population. In our country, generally, persons aged 15 to 59 years are supposed to form the population of working ages and at age 60, people generally retire or withdraw themselves from work. Thus, the population aged 60 or more divided by the number aged 15 to 59 years gives the old-age dependency ratio. The old-age dependency ratios (per 1000) are given in Statement 44. It may be seen that the old-age dependency ratio is higher in the rural than in the urban areas. In the rural areas, every 1000 persons in the working age had to provide support, physically or otherwise, to 125 aged persons, to maintain their daily life. The number was 103, a little less, in the urban areas.

| Statement 44                                                             |       |       |               |
|--------------------------------------------------------------------------|-------|-------|---------------|
| Old-age dependency ratio (per 1000) obtained from NSS surveys and census |       |       |               |
| source                                                                   | rural | urban | India         |
|                                                                          |       |       | rural + urban |
| Census 1981                                                              | 94    | 71    | 89            |
| NSS 43rd round (1987-88)                                                 | 111   | 88    | 103           |
| Census 1991                                                              | 123   | 96    | 118           |
| NSS 50th round (1993-94)                                                 | 108   | 90    | 104           |
| NSS 52nd round (1995-96)                                                 | 92    | 74    | 87            |
| Census 2001                                                              | 141   | 107   | 131           |
| NSS 60 <sup>th</sup> round (Jan-Jun, 2004)                               | 125   | 103   | 119           |

**Statement 45**  
Sex ratio (number of females per 1000 males) among aged persons obtained from census and NSS surveys

| source                         | rural | urban | India         |
|--------------------------------|-------|-------|---------------|
|                                |       |       | rural + urban |
| Census 1981                    | 954   | 986   | 960           |
| NSS 43rd round (1987-88)       | 971   | 1032  | 983           |
| Census 1991                    | 922   | 960   | 930           |
| NSS 50th round (1993-94)       | 963   | 1060  | 984           |
| NSS 52nd round (1995-96)       | 1017  | 1043  | 1023          |
| Census 2001                    | 1026  | 1038  | 1029          |
| NSS 60th round (Jan-Jun, 2004) | 985   | 1046  | 999           |

According to both the census and NSS survey estimates, the ratio has increased over time except for NSS 52<sup>nd</sup> round, where it shows a decline. The dip in the proportion of the aged in the 52<sup>nd</sup> round can most likely be attributed to age-reporting bias. It also shows that the 'burden' of the aged on the working population has increased, substantially, during the last decade. The estimates for the major states, given in Statement 43.1 (p.61) (as also in Figure 5) show that the old-age dependency ratio is the highest in Kerala (with the highest proportion of aged persons) in both the rural and urban areas, followed by Jammu &



Kashmir and Uttaranchal in the rural, and Maharashtra and Uttaranchal in the urban areas.

5.1.5 *Sex Ratio*: According to Population Census, the sex ratio among the aged that was 960 females per 1000 males during 1981, dropped to 930 during 1991 and thereafter increased to 1029 in 2001. The NSS estimates, on the other hand, showed a rising trend between the period 1993-94 and 1995-96, but declined between 1995-96 and 2004. The trend is also somewhat different in the rural and urban areas. In the rural areas, the sex ratio among the aged declined during the period 1987-88 to 1993-94 and rose in 1995-96, has again declined in 2004 (see Statement 46). In urban areas, the sex ratio increased during 1987-88 to 1993-94 and then dropped in 1995-96 and 2004.

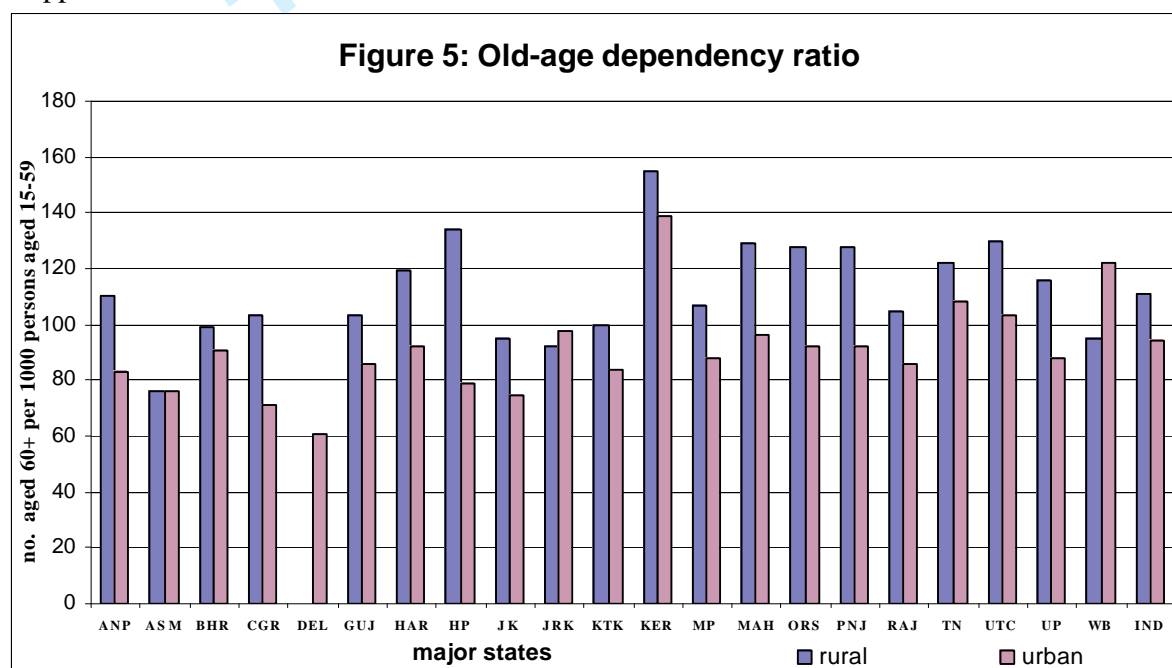

5.1.6 *Aged Persons and their Surviving Sons and Daughters*: The extended family system is the dominant form of family in India. In such a system, many of the aged, particularly those who have lost their spouses, depend on their children for maintenance. In Statement 46, the proportion of aged persons by number of their surviving children is given separately for each sex and sector at the all-India level. In India, during January-June 2004, about 94 per cent of the aged had at least one surviving child. In other words, about 6 per cent of the aged had no surviving children on the date of survey. The rural-urban differences appeared to be nil with respect to the proportion of the elderly who had surviving children. However, it was marginally higher for males than for females. The results also indicate that since 1995-96, there has been a little improvement in regard to the proportion of aged persons having their children alive.

5.1.7 *Living Arrangement:* Besides the number of surviving children, information on living arrangement of the elderly was collected in the survey. The results show that about 57 per cent of the aged were living with their spouses and another 32 per cent were living without their spouses but with their children, while about 4 to 5 per cent were living with other relations and non-relations (see Statement 47). Nevertheless, 4 to 5 per cent were still living alone. An interesting gender-differential is observed in the living arrangement among the elderly and the pattern is similar in both rural and urban areas. In terms of proportions, more males than females lived with their spouses. On the other hand, compared to the males, proportionately more females lived either alone or with their surviving children or lived with other relations and non-relations. Probably, this pattern is the impact of the

Statement 46  
Proportion (per 1000) of aged persons by number of their surviving children for each sex

| India           |                           |            |              |              |
|-----------------|---------------------------|------------|--------------|--------------|
| gender & sector | no. of surviving children |            |              |              |
|                 | 0                         | 1          | 2            | 1 or more    |
| <b>rural</b>    |                           |            |              |              |
| male            | 53<br>(55)                | 66<br>(61) | 124<br>(105) | 947<br>(945) |
| female          | 56<br>(62)                | 95<br>(81) | 129<br>(120) | 944<br>(938) |
| person          | 55<br>(58)                | 81<br>(71) | 126<br>(113) | 945<br>(942) |
| <b>urban</b>    |                           |            |              |              |
| male            | 49<br>(53)                | 77<br>(71) | 170<br>(112) | 951<br>(947) |
| female          | 66<br>(65)                | 94<br>(87) | 141<br>(111) | 934<br>(935) |
| person          | 58<br>(59)                | 85<br>(79) | 155<br>(112) | 942<br>(941) |
| all             | 55<br>(58)                | 82<br>(73) | 133<br>(112) | 945<br>(942) |

*Note: Figures in parenthesis give the corresponding estimates obtained from NSS 52nd Round (1995-96).*

Statement 47  
Per 1000 distribution of aged persons by type of living arrangement for each sex

| living arrangement                      | rural        |              |              | urban        |              |              |
|-----------------------------------------|--------------|--------------|--------------|--------------|--------------|--------------|
|                                         | male         | female       | person       | male         | female       | person       |
| 1. alone                                | 28<br>(25)   | 76<br>(61)   | 53<br>(43)   | 21<br>(30)   | 65<br>(60)   | 43<br>(45)   |
| 2. with spouse only                     | 162<br>(137) | 87<br>(77)   | 125<br>(107) | 133<br>(103) | 75<br>(57)   | 104<br>(80)  |
| 3. with spouse & other members          | 597<br>(613) | 284<br>(313) | 442<br>(462) | 649<br>(648) | 294<br>(297) | 468<br>(469) |
| 4. with spouse (2+3)                    | 759<br>(750) | 371<br>(390) | 567<br>(569) | 782<br>(751) | 369<br>(354) | 572<br>(549) |
| 5. with children                        | 168<br>(179) | 475<br>(481) | 320<br>(331) | 154<br>(178) | 482<br>(512) | 322<br>(349) |
| 6. with other relations & non-relations | 27<br>(38)   | 56<br>(59)   | 42<br>(48)   | 29<br>(35)   | 67<br>(65)   | 49<br>(51)   |
| total (include. n.r.)                   | 1000         | 1000         | 1000         | 1000         | 1000         | 1000         |

*Note: Figures in parentheses give the corresponding estimates obtained from NSS 52<sup>nd</sup> round (1995-96).*

higher incidence of widowhood among the elderly females than among the elderly males. The incidence of widowhood is higher among women because they live longer, and because in our society, men generally marry women younger than themselves. However, the living arrangement of the aged has not changed much over time since 1995-96, the proportion of the aged living alone remaining almost the same. Between 1995-96 and 2004, the proportion of the aged who lived with their spouses had however,

gone up significantly from 55 to 57 per cent in urban areas and remained the same in rural areas. The fall between 1995-96 and 2004 in the proportion of aged persons living with their children reflects the gradual break-down of the extended family system in India in both its rural and urban areas. The estimates for major states are given in Statement 47.1 (pp 62 – 65). It can be seen that more than 15 per cent of females in rural areas of Tamil Nadu and Uttaranchal and urban areas of Chhattisgarh were 'living alone' during the survey period.

**5.1.8 Economic Independence:** The living arrangement describes how the physical well-being of the aged is taken care of in the family in our society. Similarly, the economic independence reveals the associated problem of day-to-day maintenance of livelihood of the elderly. The per 1000 distribution of aged persons by state of economic independence is given in Statement 48 for each sex, separately for rural and urban sectors of India. As many as 65 per cent of the aged had to depend on others for their day-to-day maintenance. The situation was worse for elderly females. Among them, about 85 per cent were economically dependent either partially or fully. In this respect, males were much better off -- 46 to 49 per cent among them did not fully depend on others for their livelihood. Compared to 1995-96, the results of the present survey indicate that the economic condition of the elderly has improved in general and more in the urban sector, both among men and among women.

**5.1.9 Economic Support Providers:** As has been observed, a large proportion of the elderly are economically dependent on others for their livelihood. It is, therefore, pertinent to know who are the persons providing economic support to these elderly. Such information was collected in the survey and the results are presented in Statement 49 separately for each sex and sector at the all-India level. It is seen that of the economically dependent aged, a majority (about 76 to 78 per cent) had to depend on their children and a sizable proportion (13 to 15 per cent) on their spouses for their economic support. Only 3 per cent were supported by their grandchildren and the rest (6 per cent) had to depend on 'others', including non-relations. Between the years 1995-96 and 2004, the distribution of the aged who were economically dependent changed in respect of the category of persons supporting them for their livelihood. The patterns of change are not similar for males and females, but are so for the elderly living in the rural and urban areas. In the inter-survey periods, the proportion of the aged males and females depending on their children for

| Statement 48                                                                         |                                |                               |                           |                    |
|--------------------------------------------------------------------------------------|--------------------------------|-------------------------------|---------------------------|--------------------|
| Per 1000 distribution of aged persons by state of economic independence for each sex |                                |                               |                           |                    |
|                                                                                      |                                |                               |                           | India              |
| gender                                                                               | state of economic independence |                               |                           | total (incl. n.r.) |
|                                                                                      | not dependent on others        | partially dependent on others | fully dependent on others |                    |
| <b>rural</b>                                                                         |                                |                               |                           |                    |
| male                                                                                 | 513<br>(485)                   | 152<br>(180)                  | 320<br>(313)              | 1000               |
| female                                                                               | 139<br>(121)                   | 124<br>(146)                  | 720<br>(706)              | 1000               |
| person                                                                               | 327<br>(301)                   | 138<br>(163)                  | 519<br>(511)              | 1000               |
| <b>urban</b>                                                                         |                                |                               |                           |                    |
| male                                                                                 | 555<br>(515)                   | 134<br>(169)                  | 301<br>(297)              | 1000               |
| female                                                                               | 170<br>(115)                   | 95<br>(110)                   | 721<br>(757)              | 1000               |
| person                                                                               | 359<br>(311)                   | 114<br>(139)                  | 516<br>(532)              | 1000               |

*Note: Figures in parentheses give the corresponding estimates obtained from NSS 52nd Round (1995-96)*

economic support has increased in both rural and urban areas and more so in the rural areas. On the other hand, the proportion of those depending on their spouse decreased, in general, among the males but marginally increased among the aged females in the urban areas. The proportion in this category, however, did not show any change between the periods in the rural areas.

5.1.10 *Number of Dependants:* While for the economically dependent aged, information on category of persons supporting the aged was collected, information on the number of dependants was collected for the aged who were economically independent. The results have been presented in Statement 50 in the form of distribution of economically independent aged persons by number of dependants. The results are given for each sex and sector at the all-India level. It has been

Statement 50

Per 1000 distribution of economically independent aged persons by number of dependants for each sex

| gender | number of dependants |     |     |     |           | total |
|--------|----------------------|-----|-----|-----|-----------|-------|
|        | nil                  | 1   | 2   | 3-5 | 6 or more |       |
|        | <b>rural</b>         |     |     |     |           |       |
| male   | 69                   | 321 | 234 | 247 | 130       | 1000  |
| female | 320                  | 175 | 370 | 95  | 40        | 1000  |
| person | 122                  | 290 | 262 | 215 | 111       | 1000  |
|        | <b>urban</b>         |     |     |     |           |       |
| male   | 83                   | 396 | 256 | 206 | 59        | 1000  |
| female | 341                  | 146 | 417 | 79  | 17        | 1000  |
| person | 146                  | 335 | 295 | 176 | 49        | 1000  |

Statement 49

Per 1000 distribution of economically dependent aged persons by category of persons supporting the aged for each sex

| gender | category of persons supporting |              |                |            | total |
|--------|--------------------------------|--------------|----------------|------------|-------|
|        | spouse                         | own children | grand-children | others     |       |
|        | <b>rural</b>                   |              |                |            |       |
| male   | 70<br>(113)                    | 850<br>(766) | 22<br>(50)     | 57<br>(71) | 1000  |
| female | 159<br>(159)                   | 746<br>(717) | 31<br>(52)     | 63<br>(72) | 1000  |
| person | 127<br>(142)                   | 784<br>(735) | 28<br>(52)     | 61<br>(71) | 1000  |
|        | <b>urban</b>                   |              |                |            |       |
| male   | 60<br>(105)                    | 865<br>(792) | 18<br>(54)     | 57<br>(49) | 1000  |
| female | 192<br>(182)                   | 710<br>(695) | 30<br>(56)     | 68<br>(67) | 1000  |
| person | 148<br>(156)                   | 762<br>(728) | 26<br>(55)     | 64<br>(61) | 1000  |

*Note: Figures in parentheses give the corresponding estimates obtained from NSS 52nd Round (1996-96).*

observed earlier in this section that about 33 to 36 per cent of the aged were economically independent. Of them, about 85 to 88 per cent were reported to be living with one or more dependants. In other words, about 12 to 15 per cent had no dependants. The gender differences are quite pronounced in this distribution. The distribution for males appears to have shifted to the right of that for females. This implies that on an average an aged male had more dependants than an aged female during 2004. The pattern of the distribution, however, appears to be the same for both rural and urban areas.

5.1.11 *Physical Mobility:* For the aged persons the ability to move is an important indicator of their physical condition of health and also indicates the degree of their dependence on others for movement and performing their daily routine. The proportion (number per 1000) of the aged persons who cannot move around and are confined to their home or who cannot move at all and are confined to bed is given in Statement 51. The results are given for each sex and sector at all-India level. About 8 per cent of the aged

persons were either confined to their home or bed. The proportion of aged persons reporting confinement to their home or bed was found to increase with the age for all categories, being as high as 27 for persons aged 80 or more. The incidence of confinement is seen to be higher among women than among men in both rural and urban areas.

#### 5.1.12 Own Perception about Health:

The perception about one's health is an important factor in getting an idea about a person's actual health condition. A person may be considered as being in good health if he feels so. This is the criterion generally used in NSS surveys to classify an individual as sick or otherwise. Moreover, it reflects the mental health of that person. With this idea, information about the perception of aged persons about their current health was collected in the survey and is presented in Statement 52 separately for those with sickness and without it<sup>1</sup>. It can be seen that as high as 55 to 63 per cent of the aged with sickness felt that they were in a good or fair condition of health. The proportion among the aged without sickness was 77 to 78 per cent. Possibly they considered their sickness as a problem of ageing. Among the aged, the men seemed to be feeling that they had a better health condition even with sickness compared to the aged women. As against this, about 13 to 17 per cent of the aged who were not even sick considered themselves as having a 'poor' state of health.

<sup>1</sup> As part of the survey on morbidity it was ascertained for all the persons in the surveyed households, including the aged, whether they had suffered from any ailment during the last 15 days. This enabled the aged to be classified as 'with sickness' or 'without sickness'.

#### Statement 51

Proportion (number per 1000) of aged persons who cannot move and are confined to bed or home

| age-group (years) | India |        |        |       |        |        |
|-------------------|-------|--------|--------|-------|--------|--------|
|                   | rural |        |        | urban |        |        |
|                   | male  | female | person | male  | female | person |
| 60-64             | 27    | 34     | 31     | 33    | 34     | 33     |
| 64-69             | 51    | 50     | 51     | 34    | 63     | 50     |
| 70-74             | 79    | 132    | 105    | 77    | 116    | 97     |
| 75-79             | 117   | 163    | 139    | 113   | 185    | 147    |
| 80 & above        | 220   | 326    | 269    | 239   | 323    | 283    |
| all aged          | 67    | 88     | 77     | 68    | 100    | 84     |

#### Statement 52

Per 1000 distribution of aged persons by own perception about their health

| own perception about current state of health | India                      |        |        |                               |        |        |
|----------------------------------------------|----------------------------|--------|--------|-------------------------------|--------|--------|
|                                              | aged persons with sickness |        |        | aged persons without sickness |        |        |
|                                              | male                       | female | person | male                          | female | person |
|                                              | <b>rural</b>               |        |        |                               |        |        |
| excellent / very good                        | 19                         | 14     | 17     | 81                            | 43     | 62     |
| good / fair                                  | 580                        | 525    | 553    | 772                           | 770    | 771    |
| poor                                         | 401                        | 460    | 429    | 147                           | 187    | 167    |
| all aged                                     | 1000                       | 1000   | 1000   | 1000                          | 1000   | 1000   |
|                                              | <b>urban</b>               |        |        |                               |        |        |
| excellent / very good                        | 31                         | 19     | 24     | 114                           | 72     | 92     |
| good / fair                                  | 641                        | 620    | 631    | 775                           | 780    | 778    |
| poor                                         | 327                        | 360    | 345    | 111                           | 148    | 130    |
| all aged                                     | 1000                       | 1000   | 1000   | 1000                          | 1000   | 1000   |

Note: The proportions have been adjusted excluding the 'not reported cases'.

## Statement 43.1

Number of aged per 1000 persons for each sex and major state

| major state      | rural                           |        |        |        | old age<br>dependency<br>ratio | urban                           |        |        | old age<br>dependency<br>ratio |
|------------------|---------------------------------|--------|--------|--------|--------------------------------|---------------------------------|--------|--------|--------------------------------|
|                  | no. of aged per 1000<br>persons |        |        | person |                                | no. of aged per 1000<br>persons |        |        |                                |
|                  | male                            | female | person |        |                                | male                            | female | person |                                |
| Andhra Pradesh   | 73                              | 77     | 75     | 110    | 53                             | 64                              | 58     | 83     |                                |
| Assam            | 53                              | 43     | 48     | 76     | 54                             | 50                              | 52     | 76     |                                |
| Bihar            | 59                              | 52     | 55     | 99     | 62                             | 55                              | 59     | 91     |                                |
| Chhattisgarh     | 53                              | 77     | 65     | 103    | 43                             | 57                              | 50     | 71     |                                |
| Delhi            | -                               | -      | -      | -      | 40                             | 49                              | 44     | 61     |                                |
| Gujarat          | 67                              | 68     | 68     | 128    | 54                             | 69                              | 61     | 86     |                                |
| Haryana          | 72                              | 84     | 78     | 103    | 51                             | 77                              | 63     | 92     |                                |
| Himachal Pradesh | 92                              | 95     | 94     | 119    | 50                             | 52                              | 51     | 79     |                                |
| Jammu & Kashmir  | 73                              | 54     | 64     | 134    | 60                             | 50                              | 55     | 75     |                                |
| Jharkhand        | 63                              | 48     | 56     | 95     | 68                             | 69                              | 68     | 98     |                                |
| Karnataka        | 71                              | 66     | 69     | 92     | 58                             | 61                              | 59     | 84     |                                |
| Kerala           | 106                             | 123    | 115    | 155    | 103                            | 109                             | 106    | 139    |                                |
| Madhya Pradesh   | 63                              | 68     | 65     | 107    | 54                             | 64                              | 59     | 88     |                                |
| Maharashtra      | 83                              | 88     | 86     | 129    | 65                             | 76                              | 70     | 96     |                                |
| Orissa           | 90                              | 80     | 85     | 128    | 73                             | 61                              | 68     | 92     |                                |
| Punjab           | 85                              | 88     | 86     | 128    | 62                             | 67                              | 64     | 92     |                                |
| Rajasthan        | 59                              | 67     | 63     | 105    | 56                             | 61                              | 58     | 86     |                                |
| Tamil Nadu       | 87                              | 85     | 86     | 122    | 73                             | 85                              | 79     | 108    |                                |
| Uttaranchal      | 80                              | 73     | 77     | 130    | 61                             | 88                              | 74     | 103    |                                |
| Uttar Pradesh    | 64                              | 67     | 66     | 116    | 51                             | 60                              | 56     | 88     |                                |
| West Bengal      | 62                              | 64     | 63     | 95     | 90                             | 95                              | 92     | 122    |                                |
| India            | 70                              | 71     | 70     | 111    | 62                             | 71                              | 66     | 94     |                                |



## Statement 47.1

Per 1000 distribution of aged persons by type of living arrangement for each sex and major state

| major state      | living arrangement |                     |                                     |                  |                                                | total<br>(include<br>n.r.) |
|------------------|--------------------|---------------------|-------------------------------------|------------------|------------------------------------------------|----------------------------|
|                  | alone              | with spouse<br>only | with spouse<br>and other<br>members | with<br>children | with other<br>relations &<br>non-<br>relations |                            |
|                  |                    |                     |                                     |                  |                                                | <b>rural male</b>          |
| Andhra Pradesh   | 37                 | 324                 | 479                                 | 138              | 12                                             | 1000                       |
| Assam            | 3                  | 42                  | 733                                 | 165              | 10                                             | 1000                       |
| Bihar            | 31                 | 149                 | 599                                 | 193              | 10                                             | 1000                       |
| Chhattisgarh     | 37                 | 181                 | 510                                 | 204              | 35                                             | 1000                       |
| Gujarat          | 40                 | 182                 | 551                                 | 207              | 14                                             | 1000                       |
| Haryana          | 0                  | 70                  | 696                                 | 209              | 23                                             | 1000                       |
| Himachal Pradesh | 42                 | 132                 | 596                                 | 181              | 29                                             | 1000                       |
| Jammu & Kashmir  | 0                  | 35                  | 699                                 | 208              | 35                                             | 1000                       |
| Jharkhand        | 28                 | 146                 | 537                                 | 238              | 34                                             | 1000                       |
| Karnataka        | 21                 | 138                 | 685                                 | 129              | 26                                             | 1000                       |
| Kerala           | 13                 | 127                 | 698                                 | 137              | 23                                             | 1000                       |
| Madhya Pradesh   | 33                 | 190                 | 545                                 | 161              | 47                                             | 1000                       |
| Maharashtra      | 23                 | 184                 | 644                                 | 124              | 21                                             | 1000                       |
| Orissa           | 25                 | 157                 | 667                                 | 117              | 9                                              | 1000                       |
| Punjab           | 26                 | 105                 | 606                                 | 211              | 39                                             | 1000                       |
| Rajasthan        | 19                 | 122                 | 629                                 | 174              | 50                                             | 1000                       |
| Tamil Nadu       | 52                 | 302                 | 516                                 | 104              | 27                                             | 1000                       |
| Uttaranchal      | 44                 | 123                 | 543                                 | 204              | 11                                             | 1000                       |
| Uttar Pradesh    | 34                 | 115                 | 549                                 | 224              | 48                                             | 1000                       |
| West Bengal      | 12                 | 108                 | 676                                 | 158              | 17                                             | 1000                       |
| India            | 28                 | 162                 | 597                                 | 168              | 27                                             | 1000                       |

## Statement 47.1

Per 1000 distribution of aged persons by type of living arrangement for each sex and major state

| major state      | living arrangement  |                     |                                        |                  |                                                | total<br>(include<br>n.r.) |
|------------------|---------------------|---------------------|----------------------------------------|------------------|------------------------------------------------|----------------------------|
|                  | alone               | with spouse<br>only | with<br>spouse<br>and other<br>members | with<br>children | with other<br>relations<br>& non-<br>relations |                            |
|                  | <b>rural female</b> |                     |                                        |                  |                                                |                            |
| Andhra Pradesh   | 144                 | 134                 | 151                                    | 478              | 82                                             | 1000                       |
| Assam            | 64                  | 32                  | 212                                    | 626              | 14                                             | 1000                       |
| Bihar            | 53                  | 90                  | 390                                    | 416              | 21                                             | 1000                       |
| Chhattisgarh     | 118                 | 87                  | 212                                    | 498              | 63                                             | 1000                       |
| Gujarat          | 88                  | 113                 | 282                                    | 494              | 21                                             | 1000                       |
| Haryana          | 8                   | 56                  | 519                                    | 383              | 34                                             | 1000                       |
| Himachal Pradesh | 40                  | 72                  | 240                                    | 532              | 84                                             | 1000                       |
| Jammu & Kashmir  | 9                   | 36                  | 435                                    | 486              | 27                                             | 1000                       |
| Jharkhand        | 48                  | 60                  | 360                                    | 496              | 16                                             | 1000                       |
| Karnataka        | 97                  | 65                  | 195                                    | 552              | 81                                             | 1000                       |
| Kerala           | 42                  | 56                  | 281                                    | 539              | 67                                             | 1000                       |
| Madhya Pradesh   | 83                  | 129                 | 294                                    | 408              | 58                                             | 1000                       |
| Maharashtra      | 105                 | 97                  | 301                                    | 415              | 73                                             | 1000                       |
| Orissa           | 44                  | 77                  | 300                                    | 504              | 43                                             | 1000                       |
| Punjab           | 37                  | 93                  | 406                                    | 443              | 19                                             | 1000                       |
| Rajasthan        | 45                  | 78                  | 312                                    | 523              | 42                                             | 1000                       |
| Tamil Nadu       | 194                 | 110                 | 204                                    | 391              | 100                                            | 1000                       |
| Uttaranchal      | 188                 | 86                  | 286                                    | 399              | 30                                             | 1000                       |
| Uttar Pradesh    | 51                  | 85                  | 343                                    | 445              | 49                                             | 1000                       |
| West Bengal      | 57                  | 43                  | 174                                    | 624              | 61                                             | 1000                       |
| India            | 80                  | 87                  | 284                                    | 475              | 56                                             | 1000                       |

## Statement 47.1

Per 1000 distribution of aged persons by type of living arrangement for each sex and major state

| major state      | living arrangement |                     |                                        |                  |                                                | total<br>(include<br>n.r.) |
|------------------|--------------------|---------------------|----------------------------------------|------------------|------------------------------------------------|----------------------------|
|                  | alone              | with spouse<br>only | with<br>spouse<br>and other<br>members | with<br>children | with other<br>relations<br>& non-<br>relations |                            |
|                  | <b>urban male</b>  |                     |                                        |                  |                                                |                            |
| Andhra Pradesh   | 27                 | 215                 | 579                                    | 150              | 25                                             | 1000                       |
| Assam            | 10                 | 25                  | 800                                    | 141              | 21                                             | 1000                       |
| Bihar            | 7                  | 55                  | 610                                    | 248              | 11                                             | 1000                       |
| Chhattisgarh     | 12                 | 37                  | 711                                    | 240              | 0                                              | 1000                       |
| Delhi            | 18                 | 125                 | 646                                    | 188              | 10                                             | 1000                       |
| Gujarat          | 9                  | 139                 | 710                                    | 136              | 7                                              | 1000                       |
| Haryana          | 0                  | 137                 | 663                                    | 180              | 13                                             | 1000                       |
| Himachal Pradesh | 0                  | 149                 | 634                                    | 168              | 49                                             | 1000                       |
| Jammu & Kashmir  | 4                  | 133                 | 655                                    | 183              | 19                                             | 1000                       |
| Jharkhand        | 43                 | 44                  | 712                                    | 159              | 5                                              | 1000                       |
| Karnataka        | 8                  | 96                  | 729                                    | 141              | 16                                             | 1000                       |
| Kerala           | 7                  | 168                 | 695                                    | 93               | 36                                             | 1000                       |
| Madhya Pradesh   | 20                 | 103                 | 649                                    | 169              | 38                                             | 1000                       |
| Maharashtra      | 17                 | 130                 | 653                                    | 176              | 15                                             | 1000                       |
| Orissa           | 12                 | 166                 | 650                                    | 133              | 12                                             | 1000                       |
| Punjab           | 21                 | 96                  | 732                                    | 109              | 17                                             | 1000                       |
| Rajasthan        | 24                 | 112                 | 643                                    | 190              | 29                                             | 1000                       |
| Tamil Nadu       | 35                 | 221                 | 587                                    | 121              | 36                                             | 1000                       |
| Uttaranchal      | 0                  | 200                 | 586                                    | 202              | 13                                             | 1000                       |
| Uttar Pradesh    | 33                 | 112                 | 601                                    | 203              | 27                                             | 1000                       |
| West Bengal      | 27                 | 106                 | 664                                    | 102              | 80                                             | 1000                       |
| India            | 21                 | 133                 | 649                                    | 154              | 29                                             | 1000                       |

## Statement 47.1

Per 1000 distribution of aged persons by type of living arrangement for each sex and major state

| major state      | living arrangement  |                     |                                        |                  |                                                | total<br>(include<br>n.r.) |
|------------------|---------------------|---------------------|----------------------------------------|------------------|------------------------------------------------|----------------------------|
|                  | alone               | with spouse<br>only | with<br>spouse<br>and other<br>members | with<br>children | with other<br>relations<br>& non-<br>relations |                            |
|                  | <b>urban female</b> |                     |                                        |                  |                                                |                            |
| Andhra Pradesh   | 91                  | 95                  | 194                                    | 537              | 67                                             | 1000                       |
| Assam            | 0                   | 0                   | 328                                    | 544              | 30                                             | 1000                       |
| Bihar            | 47                  | 87                  | 431                                    | 359              | 31                                             | 1000                       |
| Chhattisgarh     | 168                 | 11                  | 247                                    | 469              | 105                                            | 1000                       |
| Delhi            | 59                  | 83                  | 362                                    | 463              | 21                                             | 1000                       |
| Gujarat          | 70                  | 89                  | 301                                    | 487              | 44                                             | 1000                       |
| Haryana          | 61                  | 87                  | 343                                    | 459              | 17                                             | 1000                       |
| Himachal Pradesh | 0                   | 61                  | 236                                    | 680              | 14                                             | 1000                       |
| Jammu & Kashmir  | 24                  | 117                 | 325                                    | 522              | 0                                              | 1000                       |
| Jharkhand        | 31                  | 39                  | 365                                    | 482              | 29                                             | 1000                       |
| Karnataka        | 72                  | 31                  | 209                                    | 612              | 71                                             | 1000                       |
| Kerala           | 59                  | 64                  | 201                                    | 539              | 121                                            | 1000                       |
| Madhya Pradesh   | 65                  | 52                  | 313                                    | 462              | 76                                             | 1000                       |
| Maharashtra      | 67                  | 83                  | 303                                    | 482              | 53                                             | 1000                       |
| Orissa           | 38                  | 59                  | 388                                    | 434              | 40                                             | 1000                       |
| Punjab           | 25                  | 68                  | 497                                    | 387              | 13                                             | 1000                       |
| Rajasthan        | 61                  | 81                  | 353                                    | 468              | 36                                             | 1000                       |
| Tamil Nadu       | 120                 | 99                  | 199                                    | 480              | 100                                            | 1000                       |
| Uttaranchal      | 43                  | 98                  | 236                                    | 582              | 10                                             | 1000                       |
| Uttar Pradesh    | 34                  | 79                  | 363                                    | 440              | 63                                             | 1000                       |
| West Bengal      | 37                  | 61                  | 308                                    | 462              | 113                                            | 1000                       |
| India            | 65                  | 75                  | 294                                    | 482              | 67                                             | 1000                       |

# Appendix A

## Detailed Tables

### Description of terms used in detailed tables

**ONES:** Other North-Eastern States (except Assam)

**GUTs:** Group of Union Territories

**SC:** Scheduled Caste

**ST:** Scheduled Tribe

**OBC:** Other Backward Classes

**hosp:** hospitalisation

**n.r.:** not recorded (cases)

**estd. :** estimated

1  
2  
3  
4  
5  
6  
7  
8  
9  
10  
11  
12  
13  
14  
15  
16  
17  
18  
19  
20  
21  
22  
23  
24  
25  
26  
27  
28  
29  
30  
31  
32  
33  
34  
35  
36  
37  
38  
39  
40  
41  
42  
43  
44  
45  
46  
47  
48  
49  
50  
51  
52  
53  
54  
55  
56  
57  
58  
59  
60

# Appendix A

## Part A1

### Morbidity and Hospitalisation

#### Detailed Tables

For peer review only



Table (1): Number of villages/blocks, households, persons, aged (60 years and above) persons surveyed, number of hospitalised and ailing persons surveyed and average household size, separately for each State/UT

| state/ut          | number of surveyed |             |         |              | during last 365 days        |                                 | sample persons reporting ailment during last 15 days | estimated (00) |         |                                               |              |                                               |
|-------------------|--------------------|-------------|---------|--------------|-----------------------------|---------------------------------|------------------------------------------------------|----------------|---------|-----------------------------------------------|--------------|-----------------------------------------------|
|                   | villages / blocks  | house-holds | persons | aged persons | sample persons hospitalised | sample cases of hospitalisation |                                                      | house-holds    | persons | cases of hospitalisation during last 365 days | aged persons | persons reporting ailment during last 15 days |
| (1)               | (2)                | (3)         | (4)     | (5)          | (6)                         | (7)                             | (8)                                                  | (9)            | (10)    | (11)                                          | (12)         | (13)                                          |
| Andhra Pradesh    | 325                | 3235        | 14220   | 1385         | 1302                        | 1424                            | 1616                                                 | 127106         | 518887  | 12166                                         | 38765        | 46666                                         |
| Arunachal Pradesh | 75                 | 732         | 4025    | 258          | 239                         | 241                             | 242                                                  | 1607           | 7825    | 234                                           | 442          | 480                                           |
| Assam             | 215                | 2150        | 11777   | 794          | 706                         | 713                             | 884                                                  | 40438          | 214785  | 2353                                          | 10376        | 17667                                         |
| Bihar             | 354                | 3536        | 20059   | 1590         | 1242                        | 1298                            | 1101                                                 | 110195         | 615580  | 6455                                          | 34119        | 32720                                         |
| Chhattisgarh      | 107                | 1070        | 5831    | 494          | 344                         | 383                             | 445                                                  | 34768          | 173362  | 2570                                          | 11289        | 12059                                         |
| Delhi             | 8                  | 78          | 449     | 33           | 12                          | 12                              | 3                                                    | 3402           | 18367   | 88                                            | 661          | 69                                            |
| Goa               | 8                  | 79          | 370     | 51           | 35                          | 42                              | 39                                                   | 2886           | 11202   | 414                                           | 1121         | 1544                                          |
| Gujarat           | 150                | 1497        | 8007    | 721          | 616                         | 701                             | 632                                                  | 61384          | 307814  | 9762                                          | 20859        | 21330                                         |
| Haryana           | 86                 | 851         | 4881    | 484          | 372                         | 437                             | 507                                                  | 26260          | 143202  | 5550                                          | 11118        | 13695                                         |
| Himachal Pradesh  | 126                | 1239        | 6248    | 693          | 501                         | 568                             | 654                                                  | 11323          | 52711   | 1905                                          | 4946         | 4600                                          |
| Jammu & Kashmir   | 83                 | 821         | 4772    | 403          | 323                         | 334                             | 350                                                  | 10923          | 59602   | 1030                                          | 3801         | 4155                                          |
| Jharkhand         | 141                | 1398        | 7554    | 561          | 366                         | 381                             | 248                                                  | 36589          | 195002  | 1858                                          | 10841        | 6396                                          |
| Karnataka         | 185                | 1847        | 9393    | 831          | 761                         | 817                             | 707                                                  | 69596          | 327112  | 7813                                          | 22520        | 20918                                         |
| Kerala            | 184                | 1839        | 8636    | 1154         | 963                         | 1211                            | 2148                                                 | 52360          | 232988  | 29660                                         | 26687        | 59480                                         |
| Madhya Pradesh    | 229                | 2281        | 12879   | 1093         | 864                         | 943                             | 842                                                  | 84510          | 450315  | 8418                                          | 29367        | 27603                                         |
| Maharashtra       | 265                | 2650        | 13577   | 1433         | 1158                        | 1306                            | 1442                                                 | 117727         | 557585  | 18615                                         | 47679        | 51983                                         |
| Manipur           | 107                | 1070        | 5776    | 374          | 369                         | 382                             | 158                                                  | 2769           | 14425   | 278                                           | 673          | 411                                           |
| Meghalaya         | 56                 | 536         | 2861    | 191          | 118                         | 123                             | 154                                                  | 3724           | 18864   | 133                                           | 898          | 970                                           |
| Mizoram           | 41                 | 394         | 2138    | 137          | 125                         | 127                             | 34                                                   | 769            | 3859    | 67                                            | 196          | 80                                            |
| Nagaland          | 24                 | 240         | 1219    | 80           | 96                          | 96                              | 74                                                   | 819            | 4113    | 53                                            | 148          | 257                                           |
| Orissa            | 211                | 2094        | 10292   | 1008         | 802                         | 868                             | 761                                                  | 64256          | 301133  | 7222                                          | 25527        | 23398                                         |
| Punjab            | 82                 | 816         | 4577    | 497          | 344                         | 389                             | 646                                                  | 29462          | 154633  | 4948                                          | 13361        | 21156                                         |
| Rajasthan         | 234                | 2311        | 13364   | 1135         | 857                         | 948                             | 919                                                  | 74322          | 402102  | 7301                                          | 25196        | 22748                                         |
| Sikkim            | 44                 | 440         | 2167    | 204          | 156                         | 168                             | 124                                                  | 884            | 3855    | 64                                            | 224          | 212                                           |

Continued

A-1

Report No 507: Morbidity, Health Care and the Condition of the Aged, Jan.-June, 2004

Table (1): Number of villages/blocks, households, persons, aged (60 years and above) persons surveyed, number of hospitalised and ailing persons surveyed and average household size, separately for each State/UT

| state/ut          | number of surveyed |            |         |              | during last 365 days        |                                 | sample persons reporting ailment during last 15 days | estimated (00) |         |                                               |              |                                               |
|-------------------|--------------------|------------|---------|--------------|-----------------------------|---------------------------------|------------------------------------------------------|----------------|---------|-----------------------------------------------|--------------|-----------------------------------------------|
|                   | villages / blocks  | households | persons | aged persons | sample persons hospitalised | sample cases of hospitalisation |                                                      | households     | persons | cases of hospitalisation during last 365 days | aged persons | persons reporting ailment during last 15 days |
| (1)               | (2)                | (3)        | (4)     | (5)          | (6)                         | (7)                             | (8)                                                  | (9)            | (10)    | (11)                                          | (12)         | (13)                                          |
| Tamil Nadu        | 254                | 2540       | 10348   | 1120         | 1090                        | 1194                            | 1100                                                 | 102672         | 395508  | 15805                                         | 34107        | 37573                                         |
| Tripura           | 82                 | 820        | 3798    | 306          | 347                         | 358                             | 501                                                  | 5867           | 26112   | 1055                                          | 1602         | 3407                                          |
| Uttaranchal       | 36                 | 346        | 1703    | 192          | 128                         | 138                             | 120                                                  | 12664          | 63267   | 1111                                          | 4865         | 3293                                          |
| Uttar Pradesh     | 671                | 6682       | 41137   | 3474         | 2589                        | 2798                            | 4365                                                 | 218347         | 1283403 | 17077                                         | 84086        | 128631                                        |
| West Bengal       | 317                | 3170       | 16111   | 1366         | 1298                        | 1425                            | 1836                                                 | 122084         | 583207  | 14285                                         | 36602        | 66736                                         |
| A & N Islands     | 15                 | 140        | 702     | 49           | 59                          | 63                              | 36                                                   | 493            | 2239    | 145                                           | 120          | 115                                           |
| Chandigarh        | 8                  | 80         | 367     | 28           | 30                          | 33                              | 40                                                   | 230            | 898     | 15                                            | 16           | 47                                            |
| Dadra & N. Haveli | 8                  | 80         | 428     | 30           | 36                          | 42                              | 13                                                   | 455            | 2276    | 212                                           | 117          | 35                                            |
| Daman & Diu       | 8                  | 80         | 341     | 20           | 32                          | 32                              | 14                                                   | 284            | 992     | 24                                            | 17           | 18                                            |
| Lakshadweep       | 8                  | 80         | 446     | 38           | 32                          | 34                              | 58                                                   | 49             | 240     | 14                                            | 16           | 27                                            |
| Pondicherry       | 8                  | 80         | 322     | 38           | 34                          | 37                              | 58                                                   | 842            | 3299    | 223                                           | 309          | 490                                           |
| ONES              | 429                | 4232       | 21984   | 1550         | 1450                        | 1495                            | 1287                                                 | 16440          | 79053   | 1883                                          | 4184         | 5817                                          |
| GUTs              | 55                 | 540        | 2606    | 203          | 223                         | 241                             | 219                                                  | 2353           | 9945    | 633                                           | 594          | 733                                           |
| all-India         | 4755               | 47302      | 250775  | 22265        | 18346                       | 20066                           | 22871                                                | 1432066        | 7150765 | 178921                                        | 502670       | 630970                                        |

Table (1): Number of villages/blocks, households, persons, aged (60 years and above) persons surveyed, number of hospitalised and ailing persons surveyed and average household size, separately for each State/UT

Urban

| state/ut          | number of surveyed |             |         |              | during last 365 days        |                                 | sample persons reporting ailment during last 15 days | estimated (00) |         |                                               |              |                                               |
|-------------------|--------------------|-------------|---------|--------------|-----------------------------|---------------------------------|------------------------------------------------------|----------------|---------|-----------------------------------------------|--------------|-----------------------------------------------|
|                   | villages / blocks  | house-holds | persons | aged persons | sample persons hospitalised | sample cases of hospitalisation |                                                      | house-holds    | persons | cases of hospitalisation during last 365 days | aged persons | persons reporting ailment during last 15 days |
| (1)               | (2)                | (3)         | (4)     | (5)          | (6)                         | (7)                             | (8)                                                  | (9)            | (10)    | (11)                                          | (12)         | (13)                                          |
| Andhra Pradesh    | 183                | 1824        | 8167    | 798          | 782                         | 881                             | 1150                                                 | 49582          | 197123  | 6207                                          | 11470        | 22567                                         |
| Arunachal Pradesh | 32                 | 320         | 1571    | 72           | 95                          | 98                              | 73                                                   | 235            | 1015    | 27                                            | 17           | 52                                            |
| Assam             | 48                 | 480         | 2314    | 194          | 167                         | 174                             | 185                                                  | 5327           | 22588   | 382                                           | 1180         | 1868                                          |
| Bihar             | 64                 | 638         | 3792    | 314          | 209                         | 220                             | 243                                                  | 13707          | 72955   | 788                                           | 4283         | 4631                                          |
| Chhattisgarh      | 40                 | 400         | 2069    | 151          | 154                         | 173                             | 170                                                  | 6245           | 28167   | 832                                           | 1401         | 2035                                          |
| Delhi             | 100                | 961         | 4757    | 418          | 214                         | 218                             | 111                                                  | 23077          | 99257   | 1088                                          | 4342         | 1575                                          |
| Goa               | 12                 | 120         | 533     | 72           | 48                          | 55                              | 51                                                   | 1343           | 5554    | 214                                           | 485          | 532                                           |
| Gujarat           | 131                | 1309        | 6569    | 616          | 561                         | 626                             | 605                                                  | 36737          | 158240  | 6208                                          | 9693         | 12335                                         |
| Haryana           | 55                 | 549         | 2891    | 275          | 214                         | 240                             | 277                                                  | 10125          | 47999   | 1589                                          | 3040         | 4202                                          |
| Himachal Pradesh  | 20                 | 200         | 903     | 99           | 94                          | 99                              | 88                                                   | 1528           | 5751    | 184                                           | 294          | 341                                           |
| Jammu & Kashmir   | 38                 | 380         | 2005    | 193          | 147                         | 161                             | 166                                                  | 2691           | 13556   | 283                                           | 744          | 1062                                          |
| Jharkhand         | 60                 | 598         | 3400    | 305          | 206                         | 216                             | 152                                                  | 7584           | 38998   | 841                                           | 2664         | 1968                                          |
| Karnataka         | 152                | 1518        | 7593    | 698          | 609                         | 638                             | 594                                                  | 30672          | 136290  | 3306                                          | 8098         | 7751                                          |
| Kerala            | 100                | 990         | 4697    | 612          | 515                         | 623                             | 1061                                                 | 19615          | 81492   | 8874                                          | 8672         | 19610                                         |
| Madhya Pradesh    | 128                | 1280        | 7116    | 646          | 531                         | 590                             | 561                                                  | 27843          | 146425  | 4509                                          | 8580         | 9589                                          |
| Maharashtra       | 267                | 2664        | 13001   | 1268         | 1167                        | 1339                            | 1665                                                 | 90560          | 377719  | 15209                                         | 26513        | 44847                                         |
| Manipur           | 52                 | 520         | 2833    | 231          | 188                         | 192                             | 79                                                   | 1069           | 5586    | 97                                            | 369          | 151                                           |
| Meghalaya         | 24                 | 239         | 1196    | 80           | 94                          | 105                             | 60                                                   | 671            | 2797    | 69                                            | 90           | 140                                           |
| Mizoram           | 64                 | 631         | 3236    | 246          | 257                         | 266                             | 90                                                   | 576            | 2841    | 83                                            | 145          | 50                                            |
| Nagaland          | 12                 | 120         | 594     | 29           | 49                          | 49                              | 34                                                   | 520            | 2400    | 35                                            | 76           | 125                                           |
| Orissa            | 56                 | 560         | 2711    | 261          | 205                         | 229                             | 177                                                  | 9739           | 40397   | 1346                                          | 2729         | 2195                                          |
| Punjab            | 68                 | 676         | 3446    | 329          | 253                         | 271                             | 408                                                  | 17902          | 76184   | 2375                                          | 4912         | 8130                                          |
| Rajasthan         | 108                | 1072        | 5891    | 537          | 450                         | 509                             | 520                                                  | 21730          | 104402  | 2897                                          | 6088         | 7589                                          |
| Sikkim            | 8                  | 80          | 380     | 29           | 32                          | 34                              | 13                                                   | 168            | 580     | 9                                             | 18           | 7                                             |

Continued

Table (1): Number of villages/blocks, households, persons, aged (60 years and above) persons surveyed, number of hospitalised and ailing persons surveyed and average household size, separately for each State/UT

| state/ut          | number of surveyed |             |         |              | during last 365 days        |                                 | sample persons reporting ailment during last 15 days | estimated (00) |         |                                               |              |                                               |
|-------------------|--------------------|-------------|---------|--------------|-----------------------------|---------------------------------|------------------------------------------------------|----------------|---------|-----------------------------------------------|--------------|-----------------------------------------------|
|                   | villages / blocks  | house-holds | persons | aged persons | sample persons hospitalised | sample cases of hospitalisation |                                                      | house-holds    | persons | cases of hospitalisation during last 365 days | aged persons | persons reporting ailment during last 15 days |
| (1)               | (2)                | (3)         | (4)     | (5)          | (6)                         | (7)                             | (8)                                                  | (9)            | (10)    | (11)                                          | (12)         | (13)                                          |
| Tamil Nadu        | 260                | 2599        | 10946   | 1237         | 1104                        | 1228                            | 1255                                                 | 57196          | 214404  | 8355                                          | 16939        | 20654                                         |
| Tripura           | 24                 | 240         | 1017    | 99           | 106                         | 107                             | 93                                                   | 1157           | 4220    | 194                                           | 267          | 305                                           |
| Uttaranchal       | 20                 | 200         | 943     | 98           | 79                          | 85                              | 104                                                  | 4314           | 17011   | 343                                           | 1252         | 1103                                          |
| Uttar Pradesh     | 264                | 2627        | 15097   | 1241         | 1001                        | 1115                            | 1822                                                 | 64161          | 335456  | 7401                                          | 18694        | 36403                                         |
| West Bengal       | 188                | 1879        | 8793    | 1028         | 781                         | 872                             | 1335                                                 | 45779          | 184397  | 6974                                          | 17040        | 28996                                         |
| A & N Islands     | 12                 | 120         | 543     | 40           | 60                          | 69                              | 39                                                   | 251            | 1032    | 54                                            | 33           | 61                                            |
| Chandigarh        | 34                 | 333         | 1438    | 137          | 128                         | 138                             | 145                                                  | 1777           | 6378    | 165                                           | 344          | 452                                           |
| Dadra & N. Haveli | 8                  | 80          | 355     | 27           | 32                          | 34                              | 7                                                    | 59             | 269     | 8                                             | 7            | 7                                             |
| Daman & Diu       | 8                  | 79          | 387     | 38           | 28                          | 37                              | 15                                                   | 91             | 383     | 16                                            | 26           | 13                                            |
| Lakshadweep       | 8                  | 80          | 516     | 45           | 40                          | 48                              | 74                                                   | 47             | 284     | 26                                            | 19           | 40                                            |
| Pondicherry       | 20                 | 200         | 863     | 103          | 90                          | 110                             | 169                                                  | 1561           | 6299    | 376                                           | 586          | 1175                                          |
| ONES              | 216                | 2150        | 10827   | 786          | 821                         | 851                             | 442                                                  | 4395           | 19439   | 514                                           | 983          | 830                                           |
| GUTs              | 90                 | 892         | 4102    | 390          | 378                         | 436                             | 449                                                  | 3787           | 14646   | 645                                           | 1015         | 1748                                          |
| all-India         | 2668               | 26566       | 132563  | 12566        | 10690                       | 11849                           | 13591                                                | 555641         | 2438451 | 81363                                         | 161110       | 242560                                        |

Table (1): Number of villages/blocks, households, persons, aged (60 years and above) persons surveyed, number of hospitalised and ailing persons surveyed and average household size, separately for each State/UT

| state/ut          | number of surveyed |             |         |              | during last 365 days        |                                 | sample persons reporting ailment during last 15 days | estimated (00) |         |                                               |              |                                               |
|-------------------|--------------------|-------------|---------|--------------|-----------------------------|---------------------------------|------------------------------------------------------|----------------|---------|-----------------------------------------------|--------------|-----------------------------------------------|
|                   | villages / blocks  | house-holds | persons | aged persons | sample persons hospitalised | sample cases of hospitalisation |                                                      | house-holds    | persons | cases of hospitalisation during last 365 days | aged persons | persons reporting ailment during last 15 days |
| (1)               | (2)                | (3)         | (4)     | (5)          | (6)                         | (7)                             | (8)                                                  | (9)            | (10)    | (11)                                          | (12)         | (13)                                          |
| Andhra Pradesh    | 508                | 5059        | 22387   | 2183         | 2084                        | 2305                            | 2766                                                 | 176688         | 716010  | 18373                                         | 50236        | 69233                                         |
| Arunachal Pradesh | 107                | 1052        | 5596    | 330          | 334                         | 339                             | 315                                                  | 1842           | 8841    | 261                                           | 460          | 532                                           |
| Assam             | 263                | 2630        | 14091   | 988          | 873                         | 887                             | 1069                                                 | 45765          | 237373  | 2735                                          | 11556        | 19535                                         |
| Bihar             | 418                | 4174        | 23851   | 1904         | 1451                        | 1518                            | 1344                                                 | 123902         | 688535  | 7243                                          | 38403        | 37351                                         |
| Chhattisgarh      | 147                | 1470        | 7900    | 645          | 498                         | 556                             | 615                                                  | 41013          | 201529  | 3402                                          | 12690        | 14094                                         |
| Delhi             | 108                | 1039        | 5206    | 451          | 226                         | 230                             | 114                                                  | 26479          | 117625  | 1176                                          | 5002         | 1644                                          |
| Goa               | 20                 | 199         | 903     | 123          | 83                          | 97                              | 90                                                   | 4229           | 16756   | 628                                           | 1606         | 2076                                          |
| Gujarat           | 281                | 2806        | 14576   | 1337         | 1177                        | 1327                            | 1237                                                 | 98121          | 466054  | 15970                                         | 30551        | 33665                                         |
| Haryana           | 141                | 1400        | 7772    | 759          | 586                         | 677                             | 784                                                  | 36386          | 191201  | 7139                                          | 14158        | 17897                                         |
| Himachal Pradesh  | 146                | 1439        | 7151    | 792          | 595                         | 667                             | 742                                                  | 12851          | 58463   | 2089                                          | 5240         | 4941                                          |
| Jammu & Kashmir   | 121                | 1201        | 6777    | 596          | 470                         | 495                             | 516                                                  | 13615          | 73158   | 1313                                          | 4545         | 5217                                          |
| Jharkhand         | 201                | 1996        | 10954   | 866          | 572                         | 597                             | 400                                                  | 44174          | 234001  | 2699                                          | 13505        | 8364                                          |
| Karnataka         | 337                | 3365        | 16986   | 1529         | 1370                        | 1455                            | 1301                                                 | 100268         | 463403  | 11120                                         | 30618        | 28669                                         |
| Kerala            | 284                | 2829        | 13333   | 1766         | 1478                        | 1834                            | 3209                                                 | 71975          | 314480  | 38534                                         | 35359        | 79090                                         |
| Madhya Pradesh    | 357                | 3561        | 19995   | 1739         | 1395                        | 1533                            | 1403                                                 | 112353         | 596739  | 12926                                         | 37947        | 37192                                         |
| Maharashtra       | 532                | 5314        | 26578   | 2701         | 2325                        | 2645                            | 3107                                                 | 208288         | 935303  | 33825                                         | 74193        | 96830                                         |
| Manipur           | 159                | 1590        | 8609    | 605          | 557                         | 574                             | 237                                                  | 3837           | 20011   | 375                                           | 1043         | 562                                           |
| Meghalaya         | 80                 | 775         | 4057    | 271          | 212                         | 228                             | 214                                                  | 4395           | 21661   | 201                                           | 988          | 1111                                          |
| Mizoram           | 105                | 1025        | 5374    | 383          | 382                         | 393                             | 124                                                  | 1345           | 6701    | 150                                           | 341          | 129                                           |
| Nagaland          | 36                 | 360         | 1813    | 109          | 145                         | 145                             | 108                                                  | 1339           | 6513    | 88                                            | 224          | 382                                           |
| Orissa            | 267                | 2654        | 13003   | 1269         | 1007                        | 1097                            | 938                                                  | 73995          | 341530  | 8568                                          | 28256        | 25592                                         |
| Punjab            | 150                | 1492        | 8023    | 826          | 597                         | 660                             | 1054                                                 | 47364          | 230817  | 7323                                          | 18274        | 29286                                         |
| Rajasthan         | 342                | 3383        | 19255   | 1672         | 1307                        | 1457                            | 1439                                                 | 96052          | 506504  | 10197                                         | 31284        | 30336                                         |
| Sikkim            | 52                 | 520         | 2547    | 233          | 188                         | 202                             | 137                                                  | 1052           | 4435    | 74                                            | 242          | 220                                           |

Continued

Table (1): Number of villages/blocks, households, persons, aged (60 years and above) persons surveyed, number of hospitalised and ailing persons surveyed and average household size, separately for each State/UT

| state/ut          | number of surveyed |            |         |              | during last 365 days        |                                 | sample persons reporting ailment during last 15 days | estimated (00) |         |                                               |              |                                               |
|-------------------|--------------------|------------|---------|--------------|-----------------------------|---------------------------------|------------------------------------------------------|----------------|---------|-----------------------------------------------|--------------|-----------------------------------------------|
|                   | villages / blocks  | households | persons | aged persons | sample persons hospitalised | sample cases of hospitalisation |                                                      | households     | persons | cases of hospitalisation during last 365 days | aged persons | persons reporting ailment during last 15 days |
| (1)               | (2)                | (3)        | (4)     | (5)          | (6)                         | (7)                             | (8)                                                  | (9)            | (10)    | (11)                                          | (12)         | (13)                                          |
| Tamil Nadu        | 514                | 5139       | 21294   | 2357         | 2194                        | 2422                            | 2355                                                 | 159868         | 609912  | 24161                                         | 51046        | 58227                                         |
| Tripura           | 106                | 1060       | 4815    | 405          | 453                         | 465                             | 594                                                  | 7024           | 30332   | 1249                                          | 1869         | 3712                                          |
| Uttaranchal       | 56                 | 546        | 2646    | 290          | 207                         | 223                             | 224                                                  | 16978          | 80278   | 1454                                          | 6116         | 4397                                          |
| Uttar Pradesh     | 935                | 9309       | 56234   | 4715         | 3590                        | 3913                            | 6187                                                 | 282507         | 1618859 | 24478                                         | 102779       | 165033                                        |
| West Bengal       | 505                | 5049       | 24904   | 2394         | 2079                        | 2297                            | 3171                                                 | 167863         | 767604  | 21259                                         | 53642        | 95732                                         |
| A & N Islands     | 27                 | 260        | 1245    | 89           | 119                         | 132                             | 75                                                   | 744            | 3270    | 199                                           | 152          | 177                                           |
| Chandigarh        | 42                 | 413        | 1805    | 165          | 158                         | 171                             | 185                                                  | 2007           | 7276    | 179                                           | 360          | 499                                           |
| Dadra & N. Haveli | 16                 | 160        | 783     | 57           | 68                          | 76                              | 20                                                   | 514            | 2545    | 220                                           | 124          | 41                                            |
| Daman & Diu       | 16                 | 159        | 728     | 58           | 60                          | 69                              | 29                                                   | 375            | 1376    | 40                                            | 43           | 32                                            |
| Lakshadweep       | 16                 | 160        | 962     | 83           | 72                          | 82                              | 132                                                  | 96             | 524     | 40                                            | 35           | 67                                            |
| Pondicherry       | 28                 | 280        | 1185    | 141          | 124                         | 147                             | 227                                                  | 2403           | 9599    | 599                                           | 895          | 1665                                          |
| ONES              | 645                | 6382       | 32811   | 2336         | 2271                        | 2346                            | 1729                                                 | 20834          | 98492   | 2397                                          | 5167         | 6647                                          |
| GUTs              | 145                | 1432       | 6708    | 593          | 601                         | 677                             | 668                                                  | 6140           | 24590   | 1277                                          | 1609         | 2481                                          |
| all-India         | 7423               | 73868      | 383338  | 34831        | 29036                       | 31915                           | 36462                                                | 1987707        | 9589216 | 260284                                        | 663779       | 873530                                        |



Table (2): Per 1000 distribution of households by type of structure for (i) each monthly per capita expenditure (mpce) class, (ii) each social-group and (iii) each household type

| All-India                                                            |                             |                          |            |                    |                      |      |                                       |                   |            | Rural  |  |
|----------------------------------------------------------------------|-----------------------------|--------------------------|------------|--------------------|----------------------|------|---------------------------------------|-------------------|------------|--------|--|
| monthly per capita expenditure class (Rs.)/<br>social group/hh. type | type of structure           |                          |            |                    |                      |      | no. of households per 1000 households | no. of households |            |        |  |
|                                                                      | household without structure | household with structure |            |                    |                      | n.r. |                                       | total             | estd. (00) | sample |  |
|                                                                      |                             | pucca                    | semi-pucca | serviceable kutcha | unserviceable kutcha |      |                                       |                   |            |        |  |
| (1)                                                                  | (2)                         | (3)                      | (4)        | (5)                | (6)                  | (7)  | (8)                                   | (9)               | (10)       | (11)   |  |
| 0 – 225                                                              | 0                           | 259                      | 441        | 257                | 42                   | 0    | 1000                                  | 46                | 65977      | 1944   |  |
| 225 – 255                                                            | 0                           | 285                      | 411        | 269                | 35                   | 0    | 1000                                  | 38                | 53995      | 1537   |  |
| 255 – 300                                                            | 0                           | 319                      | 421        | 230                | 31                   | 0    | 1000                                  | 88                | 125961     | 3734   |  |
| 300 – 340                                                            | 0                           | 381                      | 374        | 215                | 30                   | 0    | 1000                                  | 78                | 112145     | 3410   |  |
| 340 – 380                                                            | 0                           | 400                      | 385        | 194                | 21                   | 0    | 1000                                  | 93                | 132620     | 3961   |  |
| 380 – 420                                                            | 0                           | 427                      | 373        | 183                | 16                   | 1    | 1000                                  | 99                | 141982     | 4447   |  |
| 420 – 470                                                            | 0                           | 477                      | 335        | 174                | 14                   | 0    | 1000                                  | 102               | 146498     | 4777   |  |
| 470 – 525                                                            | 0                           | 535                      | 309        | 143                | 12                   | 0    | 1000                                  | 110               | 157063     | 5354   |  |
| 525 – 615                                                            | 0                           | 575                      | 286        | 126                | 13                   | 0    | 1000                                  | 109               | 156235     | 5627   |  |
| 615 – 775                                                            | 0                           | 647                      | 243        | 102                | 8                    | 0    | 1000                                  | 113               | 162457     | 5943   |  |
| 775 – 950                                                            | 0                           | 740                      | 190        | 58                 | 12                   | 0    | 1000                                  | 58                | 82383      | 3077   |  |
| 950 +                                                                | 0                           | 839                      | 115        | 44                 | 3                    | 0    | 1000                                  | 66                | 94751      | 3491   |  |
| all classes                                                          | 0                           | 480                      | 332        | 169                | 19                   | 0    | 1000                                  | 1000              | 1432066    | 47302  |  |
| ST                                                                   | 0                           | 195                      | 570        | 213                | 22                   | 0    | 1000                                  | 105               | 150047     | 6906   |  |
| SC                                                                   | 0                           | 410                      | 335        | 225                | 30                   | 0    | 1000                                  | 219               | 314076     | 9154   |  |
| OBC                                                                  | 0                           | 520                      | 306        | 157                | 16                   | 0    | 1000                                  | 413               | 591725     | 18502  |  |
| others                                                               | 0                           | 582                      | 280        | 124                | 14                   | 0    | 1000                                  | 263               | 376218     | 12740  |  |
| all groups                                                           | 0                           | 480                      | 332        | 169                | 19                   | 0    | 1000                                  | 1000              | 1432066    | 47302  |  |
| self-employed in non-agriculture                                     | 0                           | 551                      | 294        | 139                | 16                   | 0    | 1000                                  | 152               | 218051     | 7082   |  |
| agricultural labour                                                  | 0                           | 295                      | 408        | 262                | 36                   | 0    | 1000                                  | 275               | 393716     | 10427  |  |
| other labour                                                         | 0                           | 466                      | 343        | 170                | 21                   | 0    | 1000                                  | 111               | 158569     | 4849   |  |
| self-employed in agriculture                                         | 0                           | 530                      | 321        | 138                | 12                   | 0    | 1000                                  | 346               | 495746     | 19025  |  |
| others                                                               | 0                           | 684                      | 218        | 87                 | 10                   | 1    | 1000                                  | 116               | 165984     | 5919   |  |
| all types                                                            | 0                           | 480                      | 332        | 169                | 19                   | 0    | 1000                                  | 1000              | 1432066    | 47302  |  |
| estd. no. of hhs. (00)                                               | 212                         | 670900                   | 476432     | 254266             | 29964                | 293  | 1432066                               | X                 | X          | X      |  |
| sample hhs.                                                          | 5                           | 21735                    | 15913      | 8633               | 1006                 | 10   | 47302                                 | X                 | X          | X      |  |

Table (2): Per 1000 distribution of households by type of structure for (i) each monthly per capita expenditure (mpce) class, (ii) each social-group and (iii) each household type

All-India

Urban

| monthly per capita expenditure class (Rs.)/<br>social group/hh.<br>type | type of structure           |                          |            |                            |                              |      | no. of households per 1000 households | no. of households |            |        |
|-------------------------------------------------------------------------|-----------------------------|--------------------------|------------|----------------------------|------------------------------|------|---------------------------------------|-------------------|------------|--------|
|                                                                         | household without structure | household with structure |            |                            |                              | n.r. |                                       | total             | estd. (00) | sample |
|                                                                         |                             | pucca                    | semi-pucca | servi-<br>ceable<br>kutcha | unservi-<br>ceable<br>kutcha |      |                                       |                   |            |        |
| (1)                                                                     | (2)                         | (3)                      | (4)        | (5)                        | (6)                          | (7)  | (8)                                   | (9)               | (10)       | (11)   |
| 0-300                                                                   | 1                           | 494                      | 326        | 129                        | 50                           | 0    | 1000                                  | 27                | 15106      | 684    |
| 300-350                                                                 | 0                           | 561                      | 274        | 130                        | 35                           | 0    | 1000                                  | 19                | 10600      | 476    |
| 350-425                                                                 | 0                           | 654                      | 244        | 81                         | 20                           | 0    | 1000                                  | 51                | 28410      | 1396   |
| 425-500                                                                 | 0                           | 746                      | 187        | 55                         | 13                           | 0    | 1000                                  | 99                | 55107      | 2735   |
| 500-575                                                                 | 0                           | 738                      | 192        | 61                         | 8                            | 0    | 1000                                  | 45                | 25162      | 1225   |
| 575-665                                                                 | 0                           | 810                      | 145        | 41                         | 4                            | 0    | 1000                                  | 81                | 45164      | 2259   |
| 665-775                                                                 | 0                           | 857                      | 111        | 26                         | 6                            | 0    | 1000                                  | 110               | 60948      | 3090   |
| 775-915                                                                 | 1                           | 897                      | 82         | 16                         | 4                            | 0    | 1000                                  | 101               | 56174      | 3036   |
| 915-1120                                                                | 0                           | 938                      | 50         | 11                         | 1                            | 0    | 1000                                  | 149               | 82902      | 3829   |
| 1120-1500                                                               | 1                           | 961                      | 31         | 7                          | 0                            | 0    | 1000                                  | 158               | 87926      | 4158   |
| 1500-1925                                                               | 0                           | 976                      | 18         | 3                          | 0                            | 3    | 1000                                  | 48                | 26825      | 1311   |
| 1925+                                                                   | 0                           | 993                      | 4          | 3                          | 0                            | 0    | 1000                                  | 110               | 61317      | 2367   |
| all classes                                                             | 0                           | 842                      | 115        | 35                         | 8                            | 0    | 1000                                  | 1000              | 555641     | 26566  |
| ST                                                                      | 0                           | 653                      | 259        | 69                         | 19                           | 0    | 1000                                  | 26                | 14552      | 1803   |
| SC                                                                      | 1                           | 765                      | 150        | 62                         | 23                           | 0    | 1000                                  | 156               | 86575      | 3666   |
| OBC                                                                     | 0                           | 813                      | 136        | 43                         | 7                            | 0    | 1000                                  | 351               | 195136     | 8976   |
| others                                                                  | 0                           | 902                      | 79         | 17                         | 2                            | 0    | 1000                                  | 467               | 259378     | 12121  |
| all groups                                                              | 0                           | 842                      | 115        | 35                         | 8                            | 0    | 1000                                  | 1000              | 555641     | 26566  |
| self-employed                                                           | 0                           | 861                      | 101        | 31                         | 7                            | 0    | 1000                                  | 364               | 202439     | 10632  |
| regular wage salary earning                                             | 0                           | 907                      | 72         | 18                         | 2                            | 0    | 1000                                  | 401               | 222650     | 10198  |
| casual labour                                                           | 0                           | 564                      | 312        | 101                        | 23                           | 0    | 1000                                  | 128               | 70945      | 3053   |
| others                                                                  | 0                           | 895                      | 63         | 28                         | 14                           | 0    | 1000                                  | 107               | 59606      | 2683   |
| all types                                                               | 0                           | 842                      | 115        | 35                         | 8                            | 0    | 1000                                  | 1000              | 555641     | 26566  |
| estd. no. of hhs. (00)                                                  | 270                         | 471283                   | 60496      | 19460                      | 4053                         | 79   | 555641                                | X                 | X          | X      |
| sample hhs.                                                             | 9                           | 21718                    | 3559       | 1096                       | 180                          | 4    | 26566                                 | X                 | X          | X      |

Table (2): Per 1000 distribution of households by type of structure for (i) each monthly per capita expenditure (mpce) class, (ii) each social-group and (iii) each household type

| All-India                                                             |                             |                          |            |                            |                              |      |                                       |                   | Rural + Urban |        |
|-----------------------------------------------------------------------|-----------------------------|--------------------------|------------|----------------------------|------------------------------|------|---------------------------------------|-------------------|---------------|--------|
| monthly per capita expenditure class (Rs.)/<br>social group/ hh. type | type of structure           |                          |            |                            |                              |      | no. of households per 1000 households | no. of households |               |        |
|                                                                       | household without structure | household with structure |            |                            |                              | n.r. |                                       | total             | estd. (00)    | sample |
|                                                                       |                             | pucca                    | semi-pucca | servi-<br>ceable<br>kutcha | unservi-<br>ceable<br>kutcha |      |                                       |                   |               |        |
| (1)                                                                   | (2)                         | (3)                      | (4)        | (5)                        | (6)                          | (7)  | (8)                                   | (9)               | (10)          | (11)   |
| 0 – 225                                                               | 0                           | 299                      | 422        | 235                        | 44                           | 0    | 1000                                  | 41                | 81083         | 2628   |
| 225 – 255                                                             | 0                           | 331                      | 388        | 246                        | 35                           | 0    | 1000                                  | 32                | 64595         | 2013   |
| 255 – 300                                                             | 0                           | 381                      | 388        | 202                        | 29                           | 0    | 1000                                  | 78                | 154371        | 5130   |
| 300 – 340                                                             | 0                           | 497                      | 315        | 164                        | 25                           | 0    | 1000                                  | 84                | 167251        | 6145   |
| 340 – 380                                                             | 0                           | 456                      | 353        | 172                        | 19                           | 0    | 1000                                  | 79                | 157781        | 5186   |
| 380 – 420                                                             | 0                           | 515                      | 321        | 150                        | 14                           | 0    | 1000                                  | 94                | 187146        | 6706   |
| 420 – 470                                                             | 0                           | 580                      | 274        | 134                        | 12                           | 0    | 1000                                  | 104               | 207446        | 7867   |
| 470 – 525                                                             | 1                           | 627                      | 251        | 111                        | 10                           | 0    | 1000                                  | 107               | 213237        | 8390   |
| 525 – 615                                                             | 0                           | 686                      | 214        | 91                         | 9                            | 0    | 1000                                  | 120               | 239136        | 9456   |
| 615 – 775                                                             | 0                           | 746                      | 176        | 72                         | 6                            | 0    | 1000                                  | 126               | 250383        | 10101  |
| 775 – 950                                                             | 0                           | 794                      | 151        | 45                         | 10                           | 1    | 1000                                  | 55                | 109208        | 4388   |
| 950 +                                                                 | 0                           | 894                      | 75         | 29                         | 2                            | 0    | 1000                                  | 79                | 156068        | 5858   |
| all classes                                                           | 0                           | 572                      | 277        | 135                        | 16                           | 0    | 1000                                  | 1000              | 1987707       | 73868  |
| ST                                                                    | 0                           | 230                      | 546        | 202                        | 22                           | 0    | 1000                                  | 83                | 164600        | 8709   |
| SC                                                                    | 0                           | 482                      | 297        | 192                        | 29                           | 0    | 1000                                  | 202               | 400650        | 12820  |
| OBC                                                                   | 0                           | 586                      | 268        | 131                        | 14                           | 0    | 1000                                  | 396               | 786861        | 27478  |
| others                                                                | 0                           | 700                      | 205        | 84                         | 10                           | 0    | 1000                                  | 320               | 635596        | 24861  |
| all groups                                                            | 0                           | 572                      | 277        | 135                        | 16                           | 0    | 1000                                  | 1000              | 1987707       | 73868  |
| self-employed in<br>non-agriculture                                   | 0                           | 700                      | 202        | 87                         | 11                           | 0    | 1000                                  | 212               | 420491        | 17714  |
| agricultural labour                                                   | 0                           | 501                      | 295        | 180                        | 24                           | 0    | 1000                                  | 310               | 616366        | 20625  |
| other labour                                                          | 0                           | 495                      | 333        | 149                        | 22                           | 0    | 1000                                  | 115               | 229514        | 7902   |
| self-employed in<br>agriculture                                       | 0                           | 530                      | 321        | 138                        | 12                           | 0    | 1000                                  | 249               | 495746        | 19025  |
| others                                                                | 0                           | 723                      | 190        | 76                         | 11                           | 1    | 1000                                  | 113               | 225590        | 8602   |
| all types                                                             | 0                           | 572                      | 277        | 135                        | 16                           | 0    | 1000                                  | 1000              | 1987707       | 73868  |
| estd. no. of hhs.<br>(00)                                             | 482                         | 1142183                  | 536927     | 273726                     | 34016                        | 372  | 1987707                               | X                 | X             | X      |
| sample hhs.                                                           | 14                          | 43453                    | 19472      | 9729                       | 1186                         | 14   | 73868                                 | X                 | X             | X      |

Table (3): Per 1000 distribution of households by major source of drinking water for (i) each mpce class, (ii) each social group, and (iii) each household type

| All-India<br>monthly per<br>capita<br>expendi-<br>ture<br>class<br>(Rs.)/social<br>gp./ hh. type | major source of drinking water |        |                                |              |               |                                                        |                 |        |      |         | Rural<br>no. of households |       |
|--------------------------------------------------------------------------------------------------|--------------------------------|--------|--------------------------------|--------------|---------------|--------------------------------------------------------|-----------------|--------|------|---------|----------------------------|-------|
|                                                                                                  | bottled<br>water               | tap    | tube-<br>well/<br>hand<br>pump | tan-<br>kers | pucca<br>well | tank/<br>pond<br>reser-<br>ved<br>for<br>drin-<br>king | river/<br>canal | others | n.r. | total   | estd.<br>(00)              | sampl |
| (1)                                                                                              | (2)                            | (3)    | (4)                            | (5)          | (6)           | (7)                                                    | (8)             | (9)    | (10) | (11)    | (12)                       | (13)  |
| 0 – 225                                                                                          | 4                              | 146    | 670                            | 5            | 147           | 4                                                      | 7               | 16     | 0    | 1000    | 65977                      | 194   |
| 225 – 255                                                                                        | 6                              | 169    | 673                            | 1            | 120           | 7                                                      | 13              | 12     | 0    | 1000    | 53995                      | 153   |
| 255 – 300                                                                                        | 6                              | 184    | 662                            | 3            | 120           | 10                                                     | 8               | 8      | 0    | 1000    | 125961                     | 373   |
| 300 – 340                                                                                        | 5                              | 201    | 626                            | 4            | 140           | 9                                                      | 7               | 8      | 0    | 1000    | 112145                     | 341   |
| 340 – 380                                                                                        | 6                              | 218    | 627                            | 8            | 114           | 10                                                     | 10              | 7      | 0    | 1000    | 132620                     | 396   |
| 380 – 420                                                                                        | 8                              | 234    | 575                            | 8            | 137           | 17                                                     | 9               | 12     | 0    | 1000    | 141982                     | 444   |
| 420 – 470                                                                                        | 12                             | 250    | 547                            | 5            | 158           | 13                                                     | 7               | 9      | 0    | 1000    | 146498                     | 477   |
| 470 – 525                                                                                        | 11                             | 268    | 538                            | 7            | 140           | 15                                                     | 10              | 11     | 0    | 1000    | 157063                     | 535   |
| 525 – 615                                                                                        | 13                             | 303    | 490                            | 8            | 141           | 23                                                     | 10              | 12     | 0    | 1000    | 156235                     | 562   |
| 615 – 775                                                                                        | 15                             | 311    | 476                            | 17           | 147           | 17                                                     | 8               | 11     | 0    | 1000    | 162457                     | 594   |
| 775 – 950                                                                                        | 19                             | 336    | 466                            | 10           | 140           | 14                                                     | 6               | 10     | 0    | 1000    | 82383                      | 307   |
| 950 +                                                                                            | 17                             | 391    | 383                            | 12           | 167           | 16                                                     | 5               | 9      | 0    | 1000    | 94751                      | 349   |
| all classes                                                                                      | 10                             | 248    | 564                            | 7            | 139           | 13                                                     | 8               | 10     | 0    | 1000    | 1432066                    | 4730  |
| ST                                                                                               | 4                              | 153    | 553                            | 3            | 200           | 22                                                     | 30              | 34     | 0    | 1000    | 150047                     | 690   |
| SC                                                                                               | 9                              | 263    | 594                            | 4            | 107           | 11                                                     | 5               | 6      | 0    | 1000    | 314076                     | 915   |
| OBC                                                                                              | 9                              | 258    | 546                            | 9            | 153           | 13                                                     | 6               | 5      | 0    | 1000    | 591725                     | 1850  |
| others                                                                                           | 14                             | 256    | 573                            | 9            | 117           | 12                                                     | 6               | 12     | 0    | 1000    | 376218                     | 1274  |
| all groups                                                                                       | 10                             | 248    | 564                            | 7            | 139           | 13                                                     | 8               | 10     | 0    | 1000    | 1432066                    | 4730  |
| self-employed<br>in non-                                                                         |                                |        |                                |              |               |                                                        |                 |        |      |         |                            |       |
| agriculture                                                                                      | 13                             | 257    | 564                            | 6            | 136           | 9                                                      | 7               | 9      | 0    | 1000    | 218051                     | 708   |
| agricultural<br>labour                                                                           | 10                             | 277    | 567                            | 6            | 117           | 9                                                      | 8               | 7      | 0    | 1000    | 393716                     | 1042  |
| other labour                                                                                     | 7                              | 303    | 460                            | 13           | 180           | 19                                                     | 6               | 13     | 0    | 1000    | 158569                     | 484   |
| self-employed<br>in agriculture                                                                  | 8                              | 192    | 607                            | 7            | 143           | 18                                                     | 11              | 13     | 0    | 1000    | 495746                     | 1902  |
| others                                                                                           | 15                             | 323    | 495                            | 9            | 136           | 7                                                      | 6               | 8      | 0    | 1000    | 165984                     | 591   |
| all types                                                                                        | 10                             | 248    | 564                            | 7            | 139           | 13                                                     | 8               | 10     | 0    | 1000    | 1432066                    | 4730  |
| estd. no. of<br>hhs. (00)                                                                        | 4974                           | 389225 | 770736                         | 10219        | 200542        | 19018                                                  | 11796           | 15461  | 94   | 1432066 | X                          | :     |
| sample hhs.                                                                                      | 572                            | 12697  | 23792                          | 303          | 6577          | 1083                                                   | 773             | 1500   | 5    | 47302   | X                          | :     |

Table (3): Per 1000 distribution of households by major source of drinking water for (i) each mpce class, (ii) each social group, and (iii) each household type

| All-India<br>monthly per<br>capita<br>expendi-<br>ture<br>class<br>(Rs.)/social<br>gp./ hh. type | major source of drinking water |        |                                |              |               |                                                        |                 |        |      |        | Urban<br>no. of households |       |
|--------------------------------------------------------------------------------------------------|--------------------------------|--------|--------------------------------|--------------|---------------|--------------------------------------------------------|-----------------|--------|------|--------|----------------------------|-------|
|                                                                                                  | bottled<br>water               | tap    | tube-<br>well/<br>hand<br>pump | tan-<br>kers | pucca<br>well | tank/<br>pond<br>reser-<br>ved<br>for<br>drin-<br>king | river/<br>canal | others | n.r. | total  | estd.<br>(00)              | sampl |
| (1)                                                                                              | (2)                            | (3)    | (4)                            | (5)          | (6)           | (7)                                                    | (8)             | (9)    | (10) | (11)   | (12)                       | (13)  |
| 0-300                                                                                            | 6                              | 466    | 461                            | 9            | 56            | 0                                                      | 1               | 1      | 0    | 1000   | 15106                      | 68    |
| 300-350                                                                                          | 19                             | 504    | 399                            | 12           | 61            | 1                                                      | 0               | 5      | 0    | 1000   | 10600                      | 47    |
| 350-425                                                                                          | 14                             | 566    | 355                            | 21           | 40            | 0                                                      | 0               | 4      | 0    | 1000   | 28410                      | 139   |
| 425-500                                                                                          | 16                             | 601    | 303                            | 24           | 53            | 1                                                      | 0               | 2      | 0    | 1000   | 55107                      | 273   |
| 500-575                                                                                          | 8                              | 569    | 336                            | 18           | 63            | 2                                                      | 2               | 2      | 0    | 1000   | 25162                      | 122   |
| 575-665                                                                                          | 12                             | 649    | 256                            | 22           | 55            | 2                                                      | 1               | 3      | 0    | 1000   | 45164                      | 225   |
| 665-775                                                                                          | 32                             | 677    | 210                            | 18           | 59            | 2                                                      | 1               | 2      | 0    | 1000   | 60948                      | 309   |
| 775-915                                                                                          | 22                             | 733    | 174                            | 24           | 38            | 5                                                      | 0               | 3      | 0    | 1000   | 56174                      | 303   |
| 915-1120                                                                                         | 29                             | 724    | 179                            | 27           | 36            | 2                                                      | 0               | 3      | 0    | 1000   | 82902                      | 382   |
| 1120-1500                                                                                        | 36                             | 772    | 122                            | 30           | 34            | 2                                                      | 0               | 4      | 0    | 1000   | 87926                      | 415   |
| 1500-1925                                                                                        | 34                             | 769    | 117                            | 37           | 38            | 1                                                      | 0               | 4      | 0    | 1000   | 26825                      | 131   |
| 1925+                                                                                            | 94                             | 776    | 95                             | 17           | 16            | 0                                                      | 0               | 2      | 0    | 1000   | 61317                      | 236   |
| all classes                                                                                      | 28                             | 676    | 224                            | 23           | 44            | 2                                                      | 0               | 3      | 0    | 1000   | 555641                     | 2656  |
| ST                                                                                               | 29                             | 589    | 190                            | 18           | 128           | 21                                                     | 3               | 23     | 0    | 1000   | 14552                      | 180   |
| SC                                                                                               | 21                             | 631    | 287                            | 27           | 31            | 1                                                      | 0               | 2      | 0    | 1000   | 86575                      | 366   |
| OBC                                                                                              | 23                             | 634    | 242                            | 33           | 63            | 2                                                      | 1               | 3      | 0    | 1000   | 195136                     | 897   |
| others                                                                                           | 35                             | 728    | 190                            | 14           | 30            | 1                                                      | 0               | 2      | 0    | 1000   | 259378                     | 1212  |
| all groups                                                                                       | 28                             | 676    | 224                            | 23           | 44            | 2                                                      | 0               | 3      | 0    | 1000   | 555641                     | 2656  |
| self-employed<br>in non-                                                                         |                                |        |                                |              |               |                                                        |                 |        |      |        |                            |       |
| agriculture                                                                                      | 26                             | 654    | 254                            | 20           | 42            | 2                                                      | 0               | 2      | 0    | 1000   | 202439                     | 1063  |
| agricultural<br>labour                                                                           | 33                             | 743    | 163                            | 28           | 28            | 2                                                      | 0               | 3      | 0    | 1000   | 222650                     | 1019  |
| other labour                                                                                     | 21                             | 588    | 279                            | 20           | 86            | 1                                                      | 0               | 3      | 0    | 1000   | 70945                      | 305   |
| others                                                                                           | 31                             | 593    | 284                            | 17           | 70            | 1                                                      | 0               | 4      | 0    | 1000   | 59606                      | 268   |
| all types                                                                                        | 28                             | 676    | 224                            | 23           | 44            | 2                                                      | 0               | 3      | 0    | 1000   | 555641                     | 2656  |
| estd. no. of<br>hhs. (00)                                                                        | 7305                           | 383355 | 115097                         | 13578        | 23566         | 1049                                                   | 176             | 1515   | 0    | 555641 | X                          | ∞     |
| sample hhs.                                                                                      | 761                            | 18203  | 5134                           | 587          | 1294          | 242                                                    | 72              | 272    | 1    | 26566  | X                          | ∞     |

Table (3): Per 1000 distribution of households by major source of drinking water for (i) each mpce class, (ii) each social group, and (iii) each household type

| All-India<br>monthly per<br>capita<br>expendi-<br>ture<br>class<br>(Rs.)/social<br>gp./ hh. type | major source of drinking water |        |                                |              |               |                                                        |                 |        |      |         | Rural + Urban<br>no. of households |        |
|--------------------------------------------------------------------------------------------------|--------------------------------|--------|--------------------------------|--------------|---------------|--------------------------------------------------------|-----------------|--------|------|---------|------------------------------------|--------|
|                                                                                                  | bottled<br>water               | tap    | tube-<br>well/<br>hand<br>pump | tan-<br>kers | pucca<br>well | tank/<br>pond<br>reser-<br>ved<br>for<br>drin-<br>king | river/<br>canal | others | n.r. | total   | estd.<br>(00)                      | sample |
| (1)                                                                                              | (2)                            | (3)    | (4)                            | (5)          | (6)           | (7)                                                    | (8)             | (9)    | (10) | (11)    | (12)                               | (13)   |
| 0 – 235                                                                                          | 5                              | 200    | 634                            | 6            | 132           | 4                                                      | 6               | 13     | 0    | 1000    | 81083                              | 262    |
| 235 – 265                                                                                        | 8                              | 224    | 628                            | 3            | 110           | 6                                                      | 11              | 11     | 0    | 1000    | 64595                              | 201    |
| 265 – 320                                                                                        | 7                              | 254    | 605                            | 6            | 106           | 8                                                      | 7               | 7      | 0    | 1000    | 154371                             | 513    |
| 320 – 365                                                                                        | 8                              | 329    | 523                            | 11           | 112           | 6                                                      | 5               | 6      | 0    | 1000    | 167251                             | 614    |
| 365 – 410                                                                                        | 7                              | 276    | 579                            | 9            | 106           | 8                                                      | 8               | 6      | 0    | 1000    | 157781                             | 518    |
| 410 – 460                                                                                        | 9                              | 329    | 502                            | 12           | 118           | 13                                                     | 7               | 10     | 0    | 1000    | 187146                             | 670    |
| 460 – 520                                                                                        | 18                             | 366    | 455                            | 8            | 131           | 10                                                     | 5               | 7      | 0    | 1000    | 207446                             | 786    |
| 520 – 605                                                                                        | 14                             | 386    | 446                            | 11           | 114           | 12                                                     | 7               | 9      | 0    | 1000    | 213237                             | 839    |
| 605 – 730                                                                                        | 18                             | 432    | 395                            | 14           | 109           | 17                                                     | 7               | 9      | 0    | 1000    | 239136                             | 945    |
| 730 – 980                                                                                        | 21                             | 456    | 364                            | 21           | 112           | 12                                                     | 5               | 9      | 0    | 1000    | 250383                             | 1010   |
| 980 – 1285                                                                                       | 23                             | 434    | 386                            | 16           | 116           | 11                                                     | 5               | 8      | 0    | 1000    | 109208                             | 438    |
| 1285 +                                                                                           | 45                             | 530    | 279                            | 14           | 112           | 10                                                     | 3               | 7      | 0    | 1000    | 156068                             | 585    |
| all classes                                                                                      | 15                             | 357    | 478                            | 11           | 115           | 10                                                     | 6               | 8      | 0    | 1000    | 1987707                            | 7386   |
| ST                                                                                               | 6                              | 187    | 525                            | 4            | 194           | 22                                                     | 28              | 33     | 0    | 1000    | 164600                             | 870    |
| SC                                                                                               | 11                             | 338    | 532                            | 8            | 92            | 9                                                      | 4               | 5      | 0    | 1000    | 400650                             | 1282   |
| OBC                                                                                              | 12                             | 343    | 477                            | 14           | 133           | 11                                                     | 5               | 5      | 0    | 1000    | 786861                             | 2747   |
| others                                                                                           | 22                             | 431    | 431                            | 11           | 85            | 8                                                      | 4               | 8      | 0    | 1000    | 635596                             | 2486   |
| all groups                                                                                       | 15                             | 357    | 478                            | 11           | 115           | 10                                                     | 6               | 8      | 0    | 1000    | 1987707                            | 7386   |
| self-employed<br>in non-                                                                         |                                |        |                                |              |               |                                                        |                 |        |      |         |                                    |        |
| agriculture                                                                                      | 19                             | 446    | 416                            | 13           | 91            | 6                                                      | 4               | 5      | 0    | 1000    | 420491                             | 1771   |
| agricultural<br>labour                                                                           | 18                             | 434    | 431                            | 13           | 87            | 7                                                      | 5               | 6      | 0    | 1000    | 616366                             | 2062   |
| other labour                                                                                     | 11                             | 387    | 407                            | 15           | 152           | 14                                                     | 4               | 10     | 0    | 1000    | 229514                             | 790    |
| self-employed<br>in agriculture                                                                  | 8                              | 192    | 607                            | 7            | 143           | 18                                                     | 11              | 13     | 0    | 1000    | 495746                             | 1902   |
| others                                                                                           | 18                             | 373    | 456                            | 10           | 124           | 6                                                      | 5               | 7      | 0    | 1000    | 225590                             | 860    |
| all types                                                                                        | 15                             | 357    | 478                            | 11           | 115           | 10                                                     | 6               | 8      | 0    | 1000    | 1987707                            | 7386   |
| estd. no. of<br>hhs. (00)                                                                        | 2278                           | 772580 | 885833                         | 23797        | 224108        | 20067                                                  | 11972           | 16977  | 95   | 1987707 | X                                  | :      |
| sample hhs.                                                                                      | 1333                           | 30900  | 28926                          | 890          | 7871          | 1325                                                   | 845             | 1772   | 6    | 73868   | X                                  | :      |



Table (4): Proportion of households treating water before drinking and per 1000 distribution of such households by type of water treatment for each major source of drinking water

| All-India                             |                                                  |                                                 |        |         |              |                  |        |        |                           |        |
|---------------------------------------|--------------------------------------------------|-------------------------------------------------|--------|---------|--------------|------------------|--------|--------|---------------------------|--------|
|                                       |                                                  |                                                 |        |         |              |                  |        |        |                           | Rural  |
| major source of drinking water        | no. per 1000 hhs. treating water before drinking | type of treatment done to water before drinking |        |         |              |                  |        |        | households treating water |        |
|                                       |                                                  | ultra-violet /resin                             | filter | boiling | cloth screen | any disinfectant | others | total  | estd. no. (00)            | sample |
| (1)                                   | (2)                                              | (3)                                             | (4)    | (5)     | (6)          | (7)              | (8)    | (9)    | (10)                      | (11)   |
| tap tube well/                        | 291                                              | 8                                               | 210    | 87      | 669          | 8                | 18     | 1000   | 113397                    | 3690   |
| hand pump                             | 98                                               | 11                                              | 123    | 128     | 718          | 5                | 15     | 1000   | 75207                     | 2379   |
| tankers                               | 459                                              | 1                                               | 148    | 98      | 741          | 11               | 0      | 1000   | 4690                      | 143    |
| pucca well                            | 366                                              | 5                                               | 417    | 58      | 474          | 22               | 23     | 1000   | 73306                     | 2360   |
| tank/pond reserved for drinking       | 551                                              | 3                                               | 239    | 35      | 709          | 11               | 3      | 1000   | 10480                     | 644    |
| river/canal                           | 327                                              | 19                                              | 339    | 81      | 512          | 20               | 29     | 1000   | 3861                      | 281    |
| others                                | 276                                              | 14                                              | 621    | 124     | 230          | 0                | 11     | 1000   | 4292                      | 581    |
| total                                 | 199                                              | 8                                               | 248    | 89      | 626          | 11               | 18     | 1000   | 285234                    | 10078  |
| estd. no. of hhs. treating water (00) | 285234                                           | 2234                                            | 70865  | 25433   | 178562       | 3120             | 5021   | 285234 | X                         | X      |
| sample hhs. treating water            | 10078                                            | 61                                              | 3793   | 1216    | 4716         | 125              | 167    | 10078  | X                         | X      |

Table (4): Proportion of households treating water before drinking and per 1000 distribution of such households by type of water treatment for each major source of drinking water

| All-India                             |                                                  |                                                 |        |         |              |                  |        |        |                           |        |
|---------------------------------------|--------------------------------------------------|-------------------------------------------------|--------|---------|--------------|------------------|--------|--------|---------------------------|--------|
| Urban                                 |                                                  |                                                 |        |         |              |                  |        |        |                           |        |
| major source of drinking water        | no. per 1000 hhs. treating water before drinking | type of treatment done to water before drinking |        |         |              |                  |        |        | households treating water |        |
|                                       |                                                  | ultra-violet /resin                             | filter | boiling | cloth screen | any disinfectant | others | total  | estd. no. (00)            | sample |
| (1)                                   | (2)                                              | (3)                                             | (4)    | (5)     | (6)          | (7)              | (8)    | (9)    | (10)                      | (11)   |
| tap tube well/                        | 436                                              | 56                                              | 222    | 285     | 415          | 11               | 11     | 1000   | 167042                    | 8226   |
| hand pump                             | 164                                              | 57                                              | 145    | 372     | 384          | 15               | 27     | 1000   | 18912                     | 1055   |
| tankers                               | 546                                              | 30                                              | 576    | 141     | 253          | 0                | 0      | 1000   | 7409                      | 322    |
| pucca well                            | 570                                              | 31                                              | 589    | 108     | 258          | 0                | 14     | 1000   | 13439                     | 708    |
| tank/pond reserved for drinking       | 731                                              | 18                                              | 419    | 78      | 419          | 0                | 66     | 1000   | 767                       | 127    |
| river/canal                           | 584                                              | 0                                               | 123    | 287     | 590          | 0                | 0      | 1000   | 103                       | 22     |
| others                                | 351                                              | 0                                               | 766    | 213     | 0            | 21               | 0      | 1000   | 531                       | 126    |
| total                                 | 375                                              | 53                                              | 254    | 275     | 395          | 10               | 13     | 1000   | 208203                    | 10586  |
| estd. no. of hhs. treating water (00) | 208203                                           | 11087                                           | 52828  | 57321   | 82266        | 2067             | 2636   | 208203 | X                         | X      |
| sample hhs. treating water            | 10586                                            | 448                                             | 3385   | 3155    | 3302         | 142              | 154    | 10586  | X                         | X      |

Table (4): Proportion of households treating water before drinking and per 1000 distribution of such households by type of water treatment for each major source of drinking water

All-India

Rural + Urban

| major source of drinking water             | no. per 1000 hhs. treating water before drinking | type of treatment done to water before drinking |        |         |              |                   |        |        | households treating water |        |
|--------------------------------------------|--------------------------------------------------|-------------------------------------------------|--------|---------|--------------|-------------------|--------|--------|---------------------------|--------|
|                                            |                                                  | ultra-violet /resin                             | filter | boiling | cloth screen | any disin-fectant | others | total  | estd. no. (00)            | sample |
| (1)                                        | (2)                                              | (3)                                             | (4)    | (5)     | (6)          | (7)               | (8)    | (9)    | (10)                      | (11)   |
| tap tube well/                             | 363                                              | 36                                              | 218    | 205     | 518          | 10                | 14     | 1000   | 280439                    | 11916  |
| hand pump tankers                          | 106                                              | 20                                              | 127    | 177     | 651          | 7                 | 18     | 1000   | 94119                     | 3434   |
| pucca well tank/pond reserved for drinking | 508                                              | 19                                              | 410    | 125     | 442          | 4                 | 0      | 1000   | 12099                     | 465    |
| river/canal                                | 387                                              | 9                                               | 444    | 66      | 441          | 19                | 21     | 1000   | 86746                     | 3068   |
| others                                     | 560                                              | 4                                               | 252    | 38      | 689          | 10                | 7      | 1000   | 11247                     | 771    |
| total                                      | 331                                              | 18                                              | 334    | 86      | 514          | 20                | 29     | 1000   | 3963                      | 303    |
| estd. no. of hhs. treating water (00)      | 283                                              | 12                                              | 637    | 134     | 205          | 2                 | 10     | 1000   | 4823                      | 707    |
| sample hhs. treating water                 | 248                                              | 27                                              | 251    | 168     | 529          | 11                | 16     | 1000   | 493437                    | 20664  |
| estd. no. of hhs. treating water (00)      | 493437                                           | 13320                                           | 123692 | 82754   | 260828       | 5187              | 7656   | 493437 | X                         | X      |
| sample hhs. treating water                 | 20664                                            | 509                                             | 7178   | 4371    | 8018         | 267               | 321    | 20664  | X                         | X      |

Table (5): Number per 1000 households treating water before drinking and per 1000 distribution of such households by type of water treatment for each mpce class

| All-India                                  |                                                  |                                                 |        |         |              |                   |        |        | Rural                     |        |
|--------------------------------------------|--------------------------------------------------|-------------------------------------------------|--------|---------|--------------|-------------------|--------|--------|---------------------------|--------|
| monthly per capita expenditure class (Rs.) | no. per 1000 hhs. treating water before drinking | type of treatment done to water before drinking |        |         |              |                   |        |        | households treating water |        |
|                                            |                                                  | ultra-violet /resin                             | filter | boiling | cloth screen | any disin-fectant | others | total  | estd. no. (00)            | sample |
| (1)                                        | (2)                                              | (3)                                             | (4)    | (5)     | (6)          | (7)               | (8)    | (9)    | (10)                      | (11)   |
| 0 – 225                                    | 107                                              | 35                                              | 84     | 67      | 776          | 10                | 28     | 1000   | 7071                      | 221    |
| 225 – 255                                  | 122                                              | 6                                               | 70     | 67      | 842          | 5                 | 9      | 1000   | 6568                      | 167    |
| 255 – 300                                  | 132                                              | 2                                               | 120    | 65      | 774          | 12                | 26     | 1000   | 16645                     | 486    |
| 300 – 340                                  | 140                                              | 0                                               | 135    | 84      | 742          | 11                | 28     | 1000   | 15734                     | 482    |
| 340 – 380                                  | 153                                              | 0                                               | 132    | 56      | 779          | 23                | 9      | 1000   | 20338                     | 638    |
| 380 – 420                                  | 160                                              | 8                                               | 199    | 73      | 679          | 13                | 27     | 1000   | 22661                     | 753    |
| 420 – 470                                  | 186                                              | 3                                               | 193    | 70      | 705          | 5                 | 24     | 1000   | 27181                     | 903    |
| 470 – 525                                  | 202                                              | 2                                               | 226    | 86      | 657          | 10                | 19     | 1000   | 31711                     | 1193   |
| 525 – 615                                  | 222                                              | 3                                               | 252    | 75      | 651          | 8                 | 12     | 1000   | 34728                     | 1333   |
| 615 – 775                                  | 264                                              | 14                                              | 323    | 89      | 542          | 14                | 18     | 1000   | 42893                     | 1605   |
| 775 – 950                                  | 285                                              | 10                                              | 299    | 125     | 546          | 5                 | 16     | 1000   | 23487                     | 989    |
| 950 +                                      | 382                                              | 17                                              | 454    | 148     | 361          | 12                | 8      | 1000   | 36217                     | 1308   |
| all classes                                | 199                                              | 8                                               | 248    | 89      | 626          | 11                | 18     | 1000   | 285234                    | 10078  |
| estd. no. of hhs. treating water (00)      | 285234                                           | 2234                                            | 70865  | 25433   | 178562       | 3120              | 5021   | 285234 | X                         | X      |
| sample hhs. treating water                 | 10078                                            | 61                                              | 3793   | 1216    | 4716         | 125               | 167    | 10078  | X                         | X      |

Table (5): Number per 1000 households treating water before drinking and per 1000 distribution of such households by type of water treatment for each mpce class

| All-India                                  |                                                  |                                                 |        |         |              |                   |        |        | Urban                     |        |
|--------------------------------------------|--------------------------------------------------|-------------------------------------------------|--------|---------|--------------|-------------------|--------|--------|---------------------------|--------|
| monthly per capita expenditure class (Rs.) | no. per 1000 hhs. treating water before drinking | type of treatment done to water before drinking |        |         |              |                   |        |        | households treating water |        |
|                                            |                                                  | ultra-violet /resin                             | filter | boiling | cloth screen | any disin-fectant | others | total  | estd. no. (00)            | sample |
| (1)                                        | (2)                                              | (3)                                             | (4)    | (5)     | (6)          | (7)               | (8)    | (9)    | (10)                      | (11)   |
| 0 – 300                                    | 123                                              | 7                                               | 357    | 50      | 576          | 9                 | 2      | 1000   | 1859                      | 112    |
| 300 – 350                                  | 162                                              | 0                                               | 187    | 152     | 657          | 4                 | 0      | 1000   | 1722                      | 74     |
| 350 – 425                                  | 200                                              | 5                                               | 169    | 73      | 713          | 17                | 23     | 1000   | 5676                      | 291    |
| 425 – 500                                  | 229                                              | 2                                               | 248    | 142     | 574          | 19                | 16     | 1000   | 12599                     | 673    |
| 500 – 575                                  | 242                                              | 0                                               | 295    | 147     | 531          | 16                | 11     | 1000   | 6086                      | 369    |
| 575 – 665                                  | 292                                              | 11                                              | 259    | 183     | 524          | 11                | 12     | 1000   | 13191                     | 676    |
| 665 – 775                                  | 323                                              | 8                                               | 276    | 141     | 545          | 8                 | 21     | 1000   | 19664                     | 1109   |
| 775 – 915                                  | 355                                              | 4                                               | 237    | 205     | 518          | 20                | 16     | 1000   | 19963                     | 1171   |
| 915 – 1120                                 | 397                                              | 14                                              | 247    | 297     | 420          | 8                 | 14     | 1000   | 32943                     | 1684   |
| 1120 – 1500                                | 473                                              | 41                                              | 264    | 308     | 373          | 6                 | 9      | 1000   | 41567                     | 2144   |
| 1500 – 1925                                | 572                                              | 113                                             | 297    | 358     | 216          | 9                 | 7      | 1000   | 15344                     | 786    |
| 1925 +                                     | 613                                              | 179                                             | 232    | 439     | 132          | 7                 | 11     | 1000   | 37588                     | 1497   |
| all classes                                | 375                                              | 53                                              | 254    | 275     | 395          | 10                | 13     | 1000   | 208203                    | 10586  |
| estd. no. of hhs. treating water (00)      | 208203                                           | 11087                                           | 52828  | 57321   | 82266        | 2067              | 2636   | 208203 | X                         | X      |
| sample hhs. treating water                 | 10586                                            | 448                                             | 3385   | 3155    | 3302         | 142               | 154    | 10586  | X                         | X      |

Table (5): Number per 1000 households treating water before drinking and per 1000 distribution of such households by type of water treatment for each mpce class

| All-India                                  |                                                  |                                                 |        |         |              |                  |        |        | Rural + Urban             |        |
|--------------------------------------------|--------------------------------------------------|-------------------------------------------------|--------|---------|--------------|------------------|--------|--------|---------------------------|--------|
| monthly per capita expenditure class (Rs.) | no. per 1000 hhs. treating water before drinking | type of treatment done to water before drinking |        |         |              |                  |        |        | households treating water |        |
|                                            |                                                  | ultra-violet /resin                             | filter | boiling | cloth screen | any disinfectant | others | total  | estd. no. (00)            | sample |
| (1)                                        | (2)                                              | (3)                                             | (4)    | (5)     | (6)          | (7)              | (8)    | (9)    | (10)                      | (11)   |
| 0 – 235                                    | 110                                              | 29                                              | 141    | 63      | 734          | 10               | 22     | 1000   | 8930                      | 333    |
| 235 – 265                                  | 128                                              | 5                                               | 95     | 85      | 804          | 5                | 8      | 1000   | 8290                      | 241    |
| 265 – 320                                  | 145                                              | 3                                               | 132    | 67      | 758          | 14               | 25     | 1000   | 22321                     | 777    |
| 320 – 365                                  | 169                                              | 1                                               | 185    | 110     | 667          | 14               | 23     | 1000   | 28333                     | 1155   |
| 365 – 410                                  | 167                                              | 0                                               | 170    | 77      | 722          | 22               | 10     | 1000   | 26425                     | 1007   |
| 410 – 460                                  | 192                                              | 9                                               | 221    | 114     | 622          | 12               | 22     | 1000   | 35852                     | 1429   |
| 460 – 520                                  | 226                                              | 5                                               | 228    | 100     | 638          | 6                | 22     | 1000   | 46844                     | 2012   |
| 520 – 605                                  | 242                                              | 3                                               | 230    | 132     | 603          | 14               | 18     | 1000   | 51674                     | 2364   |
| 605 – 730                                  | 283                                              | 9                                               | 250    | 183     | 539          | 8                | 13     | 1000   | 67671                     | 3017   |
| 730 – 980                                  | 337                                              | 27                                              | 294    | 197     | 459          | 10               | 14     | 1000   | 84460                     | 3749   |
| 980 – 1285                                 | 356                                              | 51                                              | 298    | 217     | 416          | 6                | 12     | 1000   | 38831                     | 1775   |
| 1285 +                                     | 473                                              | 100                                             | 341    | 296     | 244          | 10               | 9      | 1000   | 73805                     | 2805   |
| all classes                                | 248                                              | 27                                              | 251    | 168     | 529          | 11               | 16     | 1000   | 493437                    | 20664  |
| estd. no. of hhs. treating water (00)      | 493437                                           | 13320                                           | 123692 | 82754   | 260828       | 5187             | 7656   | 493437 | X                         | X      |
| sample hhs. treating water                 | 20664                                            | 509                                             | 7178   | 4371    | 8018         | 267              | 321    | 20664  | X                         | X      |

Table (6): Per 1000 distribution of households by primary source of energy for cooking for each MPCE class

| All-India                                  |                        |                                      |                     |        |           |           |           |           |             |        |      |         | Rural          |        |
|--------------------------------------------|------------------------|--------------------------------------|---------------------|--------|-----------|-----------|-----------|-----------|-------------|--------|------|---------|----------------|--------|
| monthly per capita expenditure class (Rs.) | no cooking arrangement | primary source of energy for cooking |                     |        |           |           |           |           |             |        |      |         | households     |        |
|                                            |                        | coke/coal                            | fire-wood and chips | LPG    | gobar gas | dung cake | char-coal | kero-sene | electricity | others | n.r. | total   | estd. no. (00) | sample |
| (1)                                        | (2)                    | (3)                                  | (4)                 | (5)    | (6)       | (7)       | (8)       | (9)       | (10)        | (11)   | (12) | (13)    | (14)           | (15)   |
| 0 – 225                                    | 8                      | 4                                    | 855                 | 9      | 0         | 68        | 0         | 0         | 0           | 56     | 0    | 1000    | 65977          | 1944   |
| 225 – 255                                  | 0                      | 11                                   | 833                 | 12     | 1         | 86        | 1         | 0         | 0           | 56     | 0    | 1000    | 53995          | 1537   |
| 255 – 300                                  | 4                      | 6                                    | 832                 | 10     | 0         | 101       | 2         | 2         | 0           | 42     | 1    | 1000    | 125961         | 3734   |
| 300 – 340                                  | 10                     | 5                                    | 808                 | 11     | 0         | 105       | 1         | 3         | 0           | 56     | 0    | 1000    | 112145         | 3410   |
| 340 – 380                                  | 6                      | 10                                   | 818                 | 19     | 3         | 98        | 0         | 3         | 0           | 41     | 0    | 1000    | 132620         | 3961   |
| 380 – 420                                  | 1                      | 8                                    | 801                 | 30     | 3         | 110       | 0         | 3         | 0           | 44     | 0    | 1000    | 141982         | 4447   |
| 420 – 470                                  | 5                      | 11                                   | 834                 | 30     | 3         | 81        | 0         | 4         | 0           | 32     | 0    | 1000    | 146498         | 4777   |
| 470 – 525                                  | 3                      | 9                                    | 799                 | 57     | 3         | 95        | 0         | 8         | 0           | 26     | 1    | 1000    | 157063         | 5354   |
| 525 – 615                                  | 4                      | 8                                    | 796                 | 74     | 3         | 79        | 0         | 9         | 1           | 25     | 0    | 1000    | 156235         | 5627   |
| 615 – 775                                  | 7                      | 6                                    | 734                 | 131    | 4         | 87        | 0         | 12        | 0           | 18     | 0    | 1000    | 162457         | 5943   |
| 775 – 950                                  | 8                      | 7                                    | 642                 | 227    | 5         | 71        | 0         | 20        | 1           | 19     | 0    | 1000    | 82383          | 3077   |
| 950 +                                      | 25                     | 8                                    | 423                 | 439    | 4         | 60        | 0         | 27        | 3           | 10     | 0    | 1000    | 94751          | 3491   |
| all classes                                | 6                      | 8                                    | 770                 | 82     | 3         | 89        | 0         | 8         | 0           | 34     | 0    | 1000    | 1432066        | 47302  |
| estd. hhs. (00)                            | 277                    | 11257                                | 1103263             | 117093 | 3847      | 126857    | 484       | 10763     | 713         | 48130  | 383  | 1432066 | X              | X      |
| sample hhs.                                | 108                    | 374                                  | 36672               | 4271   | 122       | 4050      | 29        | 348       | 29          | 1282   | 17   | 47302   | X              | X      |

Table (6): Per 1000 distribution of households by primary source of energy for cooking for each MPCE class

| All-India                                  |                        |                                      |                     |        |           |           |           |           |             |        |      |        | Urban          |        |
|--------------------------------------------|------------------------|--------------------------------------|---------------------|--------|-----------|-----------|-----------|-----------|-------------|--------|------|--------|----------------|--------|
| monthly per capita expenditure class (Rs.) | no cooking arrangement | primary source of energy for cooking |                     |        |           |           |           |           |             |        |      |        | households     |        |
|                                            |                        | coke/coal                            | fire-wood and chips | LPG    | gobar gas | dung cake | char-coal | kero-sene | electricity | others | n.r. | total  | estd. no. (00) | sample |
| (1)                                        | (2)                    | (3)                                  | (4)                 | (5)    | (6)       | (7)       | (8)       | (9)       | (10)        | (11)   | (12) | (13)   | (14)           | (15)   |
| 0 – 300                                    | 48                     | 92                                   | 634                 | 128    | 0         | 32        | 5         | 20        | 0           | 40     | 0    | 1000   | 15106          | 684    |
| 300 – 350                                  | 35                     | 65                                   | 606                 | 159    | 0         | 51        | 11        | 44        | 1           | 29     | 0    | 1000   | 10600          | 476    |
| 350 – 425                                  | 32                     | 35                                   | 585                 | 202    | 1         | 37        | 1         | 92        | 0           | 16     | 0    | 1000   | 28410          | 1396   |
| 425 – 500                                  | 9                      | 52                                   | 478                 | 287    | 0         | 34        | 4         | 115       | 3           | 18     | 0    | 1000   | 55107          | 2735   |
| 500 – 575                                  | 26                     | 46                                   | 429                 | 333    | 5         | 29        | 1         | 96        | 4           | 30     | 0    | 1000   | 25162          | 1225   |
| 575 – 665                                  | 42                     | 31                                   | 331                 | 424    | 0         | 16        | 3         | 144       | 1           | 7      | 0    | 1000   | 45164          | 2259   |
| 665 – 775                                  | 20                     | 40                                   | 253                 | 494    | 1         | 11        | 3         | 172       | 3           | 5      | 0    | 1000   | 60948          | 3090   |
| 775 – 915                                  | 31                     | 22                                   | 170                 | 623    | 0         | 6         | 0         | 135       | 4           | 8      | 0    | 1000   | 56174          | 3036   |
| 915 – 1120                                 | 40                     | 25                                   | 97                  | 657    | 1         | 8         | 0         | 163       | 5           | 5      | 0    | 1000   | 82902          | 3829   |
| 1120 – 1500                                | 66                     | 7                                    | 52                  | 757    | 0         | 3         | 1         | 101       | 3           | 10     | 0    | 1000   | 87926          | 4158   |
| 1500 – 1925                                | 39                     | 9                                    | 22                  | 861    | 0         | 1         | 0         | 49        | 7           | 12     | 0    | 1000   | 26825          | 1311   |
| 1925 +                                     | 107                    | 0                                    | 15                  | 853    | 0         | 1         | 0         | 13        | 0           | 10     | 0    | 1000   | 61317          | 2367   |
| all classes                                | 44                     | 27                                   | 223                 | 566    | 1         | 13        | 1         | 110       | 3           | 12     | 0    | 1000   | 555641         | 26566  |
| estd. hhs. (00)                            | 24724                  | 15051                                | 123747              | 314275 | 310       | 7431      | 828       | 61240     | 1585        | 6400   | 50   | 555641 | X              | X      |
| sample hhs.                                | 339                    | 816                                  | 6196                | 16357  | 21        | 339       | 69        | 2106      | 89          | 225    | 9    | 26566  | X              | X      |



Table (6): Per 1000 distribution of households by primary source of energy for cooking for each MPCE class

| All-India                                  |                        |                                      |                     |        |           |           |           |           |               |        |      |         | Rural + Urban  |         |
|--------------------------------------------|------------------------|--------------------------------------|---------------------|--------|-----------|-----------|-----------|-----------|---------------|--------|------|---------|----------------|---------|
| monthly per capita expenditure class (Rs.) | no cooking arrangement | primary source of energy for cooking |                     |        |           |           |           |           |               |        |      |         | households     |         |
|                                            |                        | coke/coal                            | fire-wood and chips | LPG    | gobar gas | dung cake | char-coal | kero-sene | elec-tri-city | others | n.r. | total   | estd. no. (00) | sam-ple |
| (1)                                        | (2)                    | (3)                                  | (4)                 | (5)    | (6)       | (7)       | (8)       | (9)       | (10)          | (11)   | (12) | (13)    | (14)           | (15)    |
| 0 – 235                                    | 15                     | 21                                   | 814                 | 31     | 0         | 61        | 1         | 4         | 0             | 53     | 0    | 1000    | 81083          | 2628    |
| 235 – 265                                  | 6                      | 20                                   | 796                 | 36     | 1         | 80        | 2         | 7         | 0             | 52     | 0    | 1000    | 64595          | 2013    |
| 265 – 320                                  | 9                      | 11                                   | 787                 | 45     | 0         | 89        | 1         | 18        | 0             | 37     | 1    | 1000    | 154371         | 5130    |
| 320 – 365                                  | 10                     | 20                                   | 699                 | 102    | 0         | 82        | 2         | 40        | 1             | 43     | 0    | 1000    | 167251         | 6145    |
| 365 – 410                                  | 9                      | 16                                   | 756                 | 69     | 3         | 87        | 0         | 18        | 1             | 40     | 0    | 1000    | 157781         | 5186    |
| 410 – 460                                  | 11                     | 14                                   | 687                 | 125    | 3         | 87        | 1         | 37        | 0             | 35     | 0    | 1000    | 187146         | 6706    |
| 460 – 520                                  | 10                     | 20                                   | 663                 | 166    | 2         | 60        | 1         | 53        | 1             | 24     | 0    | 1000    | 207446         | 7867    |
| 520 – 605                                  | 11                     | 12                                   | 633                 | 206    | 2         | 72        | 0         | 41        | 1             | 21     | 1    | 1000    | 213237         | 8390    |
| 605 – 730                                  | 17                     | 14                                   | 554                 | 276    | 2         | 54        | 0         | 62        | 2             | 18     | 0    | 1000    | 239136         | 9456    |
| 730 – 980                                  | 28                     | 6                                    | 494                 | 351    | 3         | 57        | 0         | 43        | 1             | 15     | 0    | 1000    | 250383         | 10101   |
| 980 – 1285                                 | 16                     | 7                                    | 490                 | 383    | 4         | 54        | 0         | 27        | 2             | 17     | 0    | 1000    | 109208         | 4388    |
| 1285 +                                     | 57                     | 5                                    | 263                 | 602    | 2         | 37        | 0         | 22        | 2             | 10     | 0    | 1000    | 156068         | 5858    |
| all classes                                | 17                     | 13                                   | 617                 | 217    | 2         | 68        | 1         | 36        | 1             | 27     | 0    | 1000    | 1987707        | 73868   |
| estd. hhs. (00)                            | 34001                  | 26308                                | 1227010             | 431368 | 4157      | 134288    | 1312      | 72003     | 2298          | 54529  | 432  | 1987707 | X              | X       |
| sample hhs.                                | 447                    | 1190                                 | 42868               | 20628  | 143       | 4389      | 98        | 2454      | 118           | 1507   | 26   | 73868   | X              | X       |

Table (7): Number per 1000 of households having pet animals and per 1000 distribution of such households by mpce class for each State/UT

| state/ut          | number per 1000 of hhs. having a pet animal | households with pet animals in mpce class |         |         |         |         |         |         |         |         |         |         |      |       | households having a pet animal |        |
|-------------------|---------------------------------------------|-------------------------------------------|---------|---------|---------|---------|---------|---------|---------|---------|---------|---------|------|-------|--------------------------------|--------|
|                   |                                             | 0-225                                     | 225-255 | 255-300 | 300-340 | 340-380 | 380-420 | 420-470 | 470-525 | 525-615 | 615-775 | 775-950 | 950+ | total | estd. no. (00)                 | sample |
|                   |                                             | (3)                                       | (4)     | (5)     | (6)     | (7)     | (8)     | (9)     | (10)    | (11)    | (12)    | (13)    | (14) | (15)  | (16)                           | (17)   |
| (1)               | (2)                                         | (3)                                       | (4)     | (5)     | (6)     | (7)     | (8)     | (9)     | (10)    | (11)    | (12)    | (13)    | (14) | (15)  | (16)                           | (17)   |
| Andhra Pradesh    | 36                                          | 48                                        | 39      | 115     | 62      | 55      | 124     | 146     | 181     | 88      | 89      | 31      | 21   | 1000  | 4526                           | 136    |
| Arunachal Pradesh | 561                                         | 100                                       | 26      | 26      | 28      | 42      | 83      | 83      | 100     | 118     | 122     | 136     | 136  | 1000  | 903                            | 456    |
| Assam             | 524                                         | 12                                        | 10      | 50      | 48      | 62      | 92      | 121     | 142     | 201     | 179     | 63      | 22   | 1000  | 21203                          | 1145   |
| Bihar             | 175                                         | 61                                        | 44      | 103     | 69      | 134     | 170     | 105     | 116     | 110     | 55      | 26      | 7    | 1000  | 19246                          | 651    |
| Chhattisgarh      | 53                                          | 120                                       | 111     | 184     | 61      | 134     | 102     | 83      | 81      | 6       | 5       | 113     | 0    | 1000  | 1831                           | 60     |
| Delhi             | 4                                           | 0                                         | 0       | 0       | 0       | 0       | 0       | 0       | 0       | 0       | 1000    | 0       | 0    | 1000  | 15                             | 1      |
| Goa               | 186                                         | 0                                         | 0       | 0       | 0       | 0       | 0       | 34      | 112     | 53      | 205     | 57      | 539  | 1000  | 536                            | 22     |
| Gujarat           | 58                                          | 41                                        | 5       | 42      | 14      | 113     | 47      | 34      | 82      | 157     | 171     | 94      | 201  | 1000  | 3558                           | 103    |
| Haryana           | 108                                         | 0                                         | 0       | 7       | 2       | 0       | 4       | 12      | 93      | 174     | 179     | 263     | 265  | 1000  | 2830                           | 94     |
| Himachal Pradesh  | 139                                         | 10                                        | 14      | 17      | 69      | 19      | 52      | 40      | 101     | 168     | 158     | 93      | 260  | 1000  | 1571                           | 192    |
| Jammu & Kashmir   | 159                                         | 10                                        | 0       | 24      | 20      | 52      | 49      | 104     | 141     | 144     | 193     | 116     | 146  | 1000  | 1742                           | 112    |
| Jharkhand         | 373                                         | 41                                        | 68      | 117     | 123     | 108     | 133     | 128     | 66      | 115     | 74      | 17      | 11   | 1000  | 13635                          | 559    |
| Karnataka         | 160                                         | 20                                        | 27      | 68      | 68      | 106     | 93      | 147     | 94      | 93      | 158     | 38      | 88   | 1000  | 11106                          | 339    |
| Kerala            | 198                                         | 2                                         | 0       | 22      | 14      | 12      | 43      | 65      | 68      | 116     | 217     | 137     | 302  | 1000  | 10350                          | 356    |
| Madhya Pradesh    | 172                                         | 154                                       | 42      | 90      | 114     | 137     | 87      | 101     | 89      | 86      | 61      | 39      | 0    | 1000  | 14535                          | 404    |
| Maharashtra       | 131                                         | 24                                        | 31      | 69      | 48      | 71      | 122     | 99      | 144     | 103     | 124     | 85      | 79   | 1000  | 15398                          | 395    |
| Manipur           | 501                                         | 4                                         | 0       | 0       | 6       | 26      | 32      | 153     | 166     | 270     | 202     | 87      | 53   | 1000  | 1387                           | 545    |
| Meghalaya         | 553                                         | 3                                         | 0       | 8       | 35      | 55      | 71      | 125     | 192     | 207     | 187     | 71      | 47   | 1000  | 2058                           | 319    |
| Mizoram           | 419                                         | 0                                         | 0       | 1       | 9       | 1       | 30      | 41      | 52      | 220     | 236     | 201     | 209  | 1000  | 322                            | 162    |
| Nagaland          | 650                                         | 0                                         | 0       | 0       | 0       | 0       | 6       | 0       | 47      | 42      | 134     | 420     | 350  | 1000  | 533                            | 163    |

Continued

Table (7): Number per 1000 of households having pet animals and per 1000 distribution of such households by mpce class for each State/UT

| state/ut          | number per 1000 of hhs. having a pet animal | households with pet animals in mpce class |         |         |         |         |         |         |         |         |         |         |      |       | Rural households having a pet animal |        |
|-------------------|---------------------------------------------|-------------------------------------------|---------|---------|---------|---------|---------|---------|---------|---------|---------|---------|------|-------|--------------------------------------|--------|
|                   |                                             | 0-225                                     | 225-255 | 255-300 | 300-340 | 340-380 | 380-420 | 420-470 | 470-525 | 525-615 | 615-775 | 775-950 | 950+ | total | estd. no. (00)                       | sample |
|                   |                                             | (3)                                       | (4)     | (5)     | (6)     | (7)     | (8)     | (9)     | (10)    | (11)    | (12)    | (13)    | (14) | (15)  | (16)                                 | (17)   |
| (1)               | (2)                                         | (3)                                       | (4)     | (5)     | (6)     | (7)     | (8)     | (9)     | (10)    | (11)    | (12)    | (13)    | (14) | (15)  | (16)                                 | (17)   |
| Orissa            | 66                                          | 224                                       | 158     | 112     | 121     | 88      | 53      | 63      | 73      | 25      | 38      | 33      | 11   | 1000  | 4254                                 | 140    |
| Punjab            | 129                                         | 0                                         | 0       | 0       | 21      | 2       | 77      | 15      | 103     | 156     | 142     | 163     | 322  | 1000  | 3790                                 | 107    |
| Rajasthan         | 81                                          | 2                                         | 25      | 51      | 39      | 80      | 88      | 87      | 162     | 128     | 159     | 54      | 126  | 1000  | 6031                                 | 204    |
| Sikkim            | 249                                         | 0                                         | 3       | 45      | 72      | 64      | 33      | 147     | 182     | 186     | 123     | 45      | 100  | 1000  | 220                                  | 112    |
| Tamil Nadu        | 111                                         | 56                                        | 18      | 16      | 28      | 94      | 106     | 110     | 68      | 110     | 245     | 92      | 57   | 1000  | 11443                                | 235    |
| Tripura           | 352                                         | 22                                        | 60      | 105     | 71      | 116     | 133     | 140     | 114     | 99      | 86      | 31      | 23   | 1000  | 2066                                 | 297    |
| Uttaranchal       | 215                                         | 0                                         | 66      | 90      | 43      | 117     | 158     | 193     | 83      | 101     | 60      | 47      | 42   | 1000  | 2728                                 | 102    |
| Uttar Pradesh     | 89                                          | 24                                        | 55      | 111     | 76      | 130     | 106     | 132     | 112     | 82      | 86      | 51      | 35   | 1000  | 19426                                | 633    |
| West Bengal       | 110                                         | 30                                        | 33      | 78      | 77      | 86      | 152     | 161     | 101     | 108     | 94      | 42      | 37   | 1000  | 13390                                | 354    |
| A & N Islands     | 403                                         | 0                                         | 0       | 0       | 0       | 72      | 44      | 7       | 73      | 89      | 120     | 306     | 289  | 1000  | 198                                  | 84     |
| Chandigarh        | 58                                          | 0                                         | 0       | 0       | 0       | 0       | 0       | 0       | 0       | 0       | 0       | 0       | 1000 | 1000  | 13                                   | 6      |
| Dadra & N. Haveli | 270                                         | 77                                        | 0       | 0       | 0       | 0       | 0       | 96      | 105     | 164     | 328     | 50      | 179  | 1000  | 123                                  | 26     |
| Daman & Diu       | 43                                          | 0                                         | 0       | 0       | 0       | 0       | 0       | 0       | 106     | 202     | 0       | 485     | 208  | 1000  | 12                                   | 5      |
| Lakshadweep       | 69                                          | 0                                         | 0       | 0       | 0       | 0       | 0       | 0       | 0       | 164     | 607     | 229     | 1000 | 3     | 7                                    |        |
| Pondicherry       | 141                                         | 0                                         | 0       | 0       | 0       | 158     | 0       | 138     | 189     | 19      | 0       | 0       | 497  | 1000  | 119                                  | 7      |
| ONES              | 456                                         | 20                                        | 20      | 36      | 36      | 59      | 75      | 117     | 138     | 166     | 150     | 100     | 82   | 1000  | 7489                                 | 2054   |
| GUTs              | 199                                         | 20                                        | 0       | 0       | 0       | 70      | 18      | 63      | 109     | 91      | 138     | 159     | 331  | 1000  | 469                                  | 135    |
| All-India         | 133                                         | 42                                        | 35      | 72      | 63      | 90      | 105     | 111     | 108     | 117     | 124     | 64      | 70   | 1000  | 191102                               | 8533   |

Table (7): Number per 1000 of households having pet animals and per 1000 distribution of such households by mpce class for each State/UT

| state/ut          | number per 1000 of hhs. having a pet animal | households with pet animals in mpce class |         |         |         |         |         |         |         |          |           |           |       |       | Urban households having a pet animal |        |
|-------------------|---------------------------------------------|-------------------------------------------|---------|---------|---------|---------|---------|---------|---------|----------|-----------|-----------|-------|-------|--------------------------------------|--------|
|                   |                                             | 0-300                                     | 300-350 | 350-425 | 425-500 | 500-575 | 575-665 | 665-775 | 775-915 | 915-1120 | 1120-1500 | 1500-1925 | 1925+ | total | estd. no. (00)                       | sample |
| (1)               | (2)                                         | (3)                                       | (4)     | (5)     | (6)     | (7)     | (8)     | (9)     | (10)    | (11)     | (12)      | (13)      | (14)  | (15)  | (16)                                 | (17)   |
| Andhra Pradesh    | 47                                          | 28                                        | 0       | 16      | 58      | 1       | 50      | 26      | 77      | 126      | 174       | 49        | 396   | 1000  | 2314                                 | 74     |
| Arunachal Pradesh | 121                                         | 3                                         | 0       | 0       | 75      | 0       | 43      | 168     | 503     | 164      | 14        | 31        | 0     | 1000  | 28                                   | 39     |
| Assam             | 140                                         | 0                                         | 0       | 15      | 19      | 77      | 145     | 208     | 166     | 234      | 72        | 23        | 42    | 1000  | 745                                  | 90     |
| Bihar             | 71                                          | 105                                       | 31      | 161     | 107     | 36      | 56      | 62      | 125     | 220      | 6         | 0         | 92    | 1000  | 980                                  | 50     |
| Chhattisgarh      | 42                                          | 108                                       | 0       | 33      | 114     | 0       | 20      | 191     | 172     | 262      | 100       | 0         | 0     | 1000  | 265                                  | 14     |
| Delhi             | 18                                          | 0                                         | 0       | 0       | 22      | 0       | 14      | 297     | 27      | 46       | 73        | 0         | 520   | 1000  | 407                                  | 16     |
| Goa               | 238                                         | 0                                         | 0       | 4       | 77      | 0       | 52      | 139     | 157     | 78       | 249       | 136       | 108   | 1000  | 320                                  | 33     |
| Gujarat           | 15                                          | 0                                         | 0       | 0       | 126     | 16      | 8       | 46      | 72      | 213      | 425       | 14        | 79    | 1000  | 551                                  | 27     |
| Haryana           | 45                                          | 72                                        | 0       | 90      | 0       | 6       | 35      | 119     | 147     | 347      | 145       | 31        | 5     | 1000  | 456                                  | 22     |
| Himachal Pradesh  | 76                                          | 0                                         | 0       | 0       | 277     | 0       | 0       | 28      | 187     | 74       | 313       | 0         | 119   | 1000  | 116                                  | 20     |
| Jammu & Kashmir   | 17                                          | 0                                         | 0       | 0       | 0       | 0       | 0       | 164     | 507     | 135      | 89        | 0         | 106   | 1000  | 45                                   | 11     |
| Jharkhand         | 45                                          | 0                                         | 16      | 74      | 255     | 91      | 16      | 36      | 30      | 210      | 146       | 18        | 110   | 1000  | 340                                  | 30     |
| Karnataka         | 67                                          | 17                                        | 7       | 49      | 139     | 105     | 114     | 56      | 161     | 50       | 159       | 78        | 64    | 1000  | 2054                                 | 120    |
| Kerala            | 158                                         | 2                                         | 11      | 41      | 66      | 50      | 70      | 111     | 57      | 107      | 172       | 140       | 172   | 1000  | 3105                                 | 182    |
| Madhya Pradesh    | 59                                          | 5                                         | 4       | 237     | 164     | 81      | 152     | 96      | 91      | 39       | 77        | 1         | 52    | 1000  | 1635                                 | 94     |
| Maharashtra       | 60                                          | 11                                        | 130     | 66      | 67      | 23      | 42      | 78      | 112     | 184      | 111       | 38        | 140   | 1000  | 5447                                 | 144    |
| Manipur           | 188                                         | 0                                         | 0       | 9       | 139     | 71      | 175     | 315     | 118     | 123      | 51        | 0         | 0     | 1000  | 201                                  | 108    |
| Meghalaya         | 159                                         | 0                                         | 7       | 3       | 0       | 0       | 92      | 12      | 70      | 180      | 202       | 366       | 67    | 1000  | 107                                  | 46     |
| Mizoram           | 328                                         | 6                                         | 0       | 0       | 31      | 0       | 45      | 79      | 205     | 233      | 250       | 90        | 62    | 1000  | 189                                  | 208    |
| Nagaland          | 349                                         | 0                                         | 0       | 0       | 0       | 0       | 0       | 45      | 80      | 241      | 421       | 97        | 115   | 1000  | 181                                  | 38     |

Continued

Table (7): Number per 1000 of households having pet animals and per 1000 distribution of such households by mpce class for each State/UT

| state/ut          | number per 1000 of hhs. having a pet animal | households with pet animals in mpce class |         |         |         |         |         |         |         |          |           |           |       |       | Urban households having a pet animal |        |
|-------------------|---------------------------------------------|-------------------------------------------|---------|---------|---------|---------|---------|---------|---------|----------|-----------|-----------|-------|-------|--------------------------------------|--------|
|                   |                                             | 0-300                                     | 300-350 | 350-425 | 425-500 | 500-575 | 575-665 | 665-775 | 775-915 | 915-1120 | 1120-1500 | 1500-1925 | 1925+ | total | estd. no. (00)                       | sample |
|                   |                                             | (3)                                       | (4)     | (5)     | (6)     | (7)     | (8)     | (9)     | (10)    | (11)     | (12)      | (13)      | (14)  | (15)  | (16)                                 | (17)   |
| (1)               | (2)                                         | (3)                                       | (4)     | (5)     | (6)     | (7)     | (8)     | (9)     | (10)    | (11)     | (12)      | (13)      | (14)  | (15)  | (16)                                 | (17)   |
| Orissa            | 34                                          | 109                                       | 71      | 0       | 94      | 146     | 64      | 169     | 20      | 89       | 40        | 47        | 151   | 1000  | 334                                  | 30     |
| Punjab            | 33                                          | 0                                         | 16      | 11      | 210     | 0       | 3       | 241     | 251     | 29       | 135       | 15        | 89    | 1000  | 589                                  | 35     |
| Rajasthan         | 28                                          | 93                                        | 0       | 58      | 21      | 39      | 55      | 58      | 58      | 354      | 204       | 32        | 28    | 1000  | 616                                  | 39     |
| Sikkim            | 140                                         | 0                                         | 0       | 0       | 0       | 0       | 0       | 158     | 59      | 296      | 65        | 422       | 0     | 1000  | 23                                   | 14     |
| Tamil Nadu        | 48                                          | 1                                         | 0       | 62      | 109     | 32      | 81      | 85      | 68      | 135      | 164       | 43        | 220   | 1000  | 2746                                 | 153    |
| Tripura           | 56                                          | 0                                         | 0       | 0       | 312     | 184     | 247     | 133     | 0       | 124      | 0         | 0         | 0     | 1000  | 65                                   | 15     |
| Uttaranchal       | 84                                          | 0                                         | 0       | 12      | 143     | 0       | 209     | 96      | 43      | 112      | 170       | 203       | 10    | 1000  | 362                                  | 25     |
| Uttar Pradesh     | 45                                          | 39                                        | 24      | 127     | 79      | 93      | 49      | 89      | 93      | 158      | 87        | 88        | 76    | 1000  | 2857                                 | 150    |
| West Bengal       | 46                                          | 37                                        | 48      | 94      | 76      | 9       | 47      | 75      | 43      | 136      | 142       | 125       | 168   | 1000  | 2084                                 | 104    |
| A & N Islands     | 96                                          | 0                                         | 0       | 0       | 0       | 28      | 28      | 28      | 582     | 265      | 25        | 31        | 13    | 1000  | 24                                   | 16     |
| Chandigarh        | 11                                          | 0                                         | 0       | 0       | 39      | 0       | 0       | 0       | 0       | 169      | 143       | 0         | 650   | 1000  | 20                                   | 10     |
| Dadra & N. Haveli | 11                                          | 0                                         | 0       | 0       | 0       | 0       | 462     | 192     | 0       | 0        | 0         | 346       | 0     | 1000  | 1                                    | 3      |
| Daman & Diu       | 0                                           | 0                                         | 0       | 0       | 0       | 0       | 0       | 0       | 0       | 0        | 0         | 0         | 0     | 0     | 0                                    | 0      |
| Lakshadweep       | 212                                         | 0                                         | 0       | 0       | 29      | 19      | 0       | 50      | 514     | 326      | 35        | 26        | 0     | 1000  | 10                                   | 23     |
| Pondicherry       | 33                                          | 192                                       | 0       | 0       | 77      | 138     | 69      | 103     | 73      | 0        | 0         | 217       | 131   | 1000  | 52                                   | 13     |
| ONES              | 181                                         | 1                                         | 1       | 3       | 71      | 33      | 89      | 132     | 126     | 190      | 198       | 106       | 50    | 1000  | 795                                  | 468    |
| GUTs              | 28                                          | 93                                        | 0       | 0       | 47      | 75      | 43      | 62      | 215     | 122      | 36        | 117       | 189   | 1000  | 107                                  | 65     |
| All-India         | 53                                          | 22                                        | 34      | 70      | 88      | 42      | 66      | 91      | 97      | 145      | 137       | 63        | 145   | 1000  | 29268                                | 1996   |

Table (7): Number per 1000 of households having pet animals and per 1000 distribution of such households by mpce class for each State/UT

| state/ut          | number per 1000 of hhs. having a pet animal | households with pet animals in mpce class |         |         |         |         |         |         |         |         |         |          |       |       | Rural+Urban households having a pet animal |        |
|-------------------|---------------------------------------------|-------------------------------------------|---------|---------|---------|---------|---------|---------|---------|---------|---------|----------|-------|-------|--------------------------------------------|--------|
|                   |                                             | 0-235                                     | 235-265 | 265-320 | 320-365 | 365-410 | 410-460 | 460-520 | 520-605 | 605-730 | 730-980 | 980-1285 | 1285+ | total | estd. no. (00)                             | sample |
|                   |                                             | (3)                                       | (4)     | (5)     | (6)     | (7)     | (8)     | (9)     | (10)    | (11)    | (12)    | (13)     | (14)  | (15)  | (16)                                       | (17)   |
| (1)               | (2)                                         | (3)                                       | (4)     | (5)     | (6)     | (7)     | (8)     | (9)     | (10)    | (11)    | (12)    | (13)     | (14)  | (15)  | (16)                                       | (17)   |
| Andhra Pradesh    | 39                                          | 41                                        | 26      | 82      | 61      | 37      | 99      | 106     | 146     | 101     | 117     | 37       | 148   | 1000  | 6840                                       | 210    |
| Arunachal Pradesh | 505                                         | 97                                        | 25      | 25      | 29      | 41      | 82      | 86      | 112     | 119     | 119     | 133      | 132   | 1000  | 931                                        | 495    |
| Assam             | 480                                         | 11                                        | 9       | 49      | 47      | 62      | 94      | 124     | 142     | 202     | 175     | 61       | 22    | 1000  | 21948                                      | 1235   |
| Bihar             | 163                                         | 63                                        | 43      | 106     | 71      | 129     | 164     | 103     | 117     | 115     | 53      | 25       | 11    | 1000  | 20226                                      | 701    |
| Chhattisgarh      | 51                                          | 118                                       | 97      | 165     | 68      | 117     | 91      | 97      | 93      | 39      | 17      | 98       | 0     | 1000  | 2096                                       | 74     |
| Delhi             | 16                                          | 0                                         | 0       | 0       | 21      | 0       | 14      | 287     | 26      | 44      | 106     | 0        | 502   | 1000  | 423                                        | 17     |
| Goa               | 202                                         | 0                                         | 0       | 2       | 29      | 0       | 20      | 73      | 128     | 62      | 221     | 86       | 378   | 1000  | 856                                        | 55     |
| Gujarat           | 42                                          | 35                                        | 5       | 37      | 29      | 100     | 42      | 36      | 80      | 164     | 205     | 83       | 184   | 1000  | 4109                                       | 130    |
| Haryana           | 90                                          | 10                                        | 0       | 19      | 2       | 1       | 9       | 27      | 101     | 198     | 174     | 231      | 229   | 1000  | 3286                                       | 116    |
| Himachal Pradesh  | 131                                         | 9                                         | 13      | 16      | 83      | 18      | 48      | 39      | 107     | 162     | 169     | 86       | 250   | 1000  | 1686                                       | 212    |
| Jammu & Kashmir   | 131                                         | 10                                        | 0       | 24      | 20      | 51      | 48      | 105     | 150     | 144     | 190     | 113      | 145   | 1000  | 1787                                       | 123    |
| Jharkhand         | 316                                         | 40                                        | 66      | 116     | 127     | 108     | 130     | 126     | 65      | 117     | 75      | 17       | 14    | 1000  | 13975                                      | 589    |
| Karnataka         | 131                                         | 19                                        | 24      | 65      | 79      | 106     | 96      | 133     | 104     | 86      | 158     | 45       | 84    | 1000  | 13160                                      | 459    |
| Kerala            | 187                                         | 2                                         | 3       | 27      | 26      | 21      | 49      | 76      | 66      | 114     | 207     | 138      | 272   | 1000  | 13455                                      | 538    |
| Madhya Pradesh    | 144                                         | 139                                       | 38      | 105     | 119     | 132     | 94      | 101     | 89      | 81      | 62      | 35       | 5     | 1000  | 16169                                      | 498    |
| Maharashtra       | 100                                         | 21                                        | 57      | 68      | 53      | 58      | 101     | 93      | 136     | 124     | 121     | 73       | 95    | 1000  | 20845                                      | 539    |
| Manipur           | 414                                         | 4                                         | 0       | 1       | 23      | 32      | 50      | 173     | 160     | 251     | 183     | 76       | 46    | 1000  | 1588                                       | 653    |
| Meghalaya         | 493                                         | 3                                         | 0       | 8       | 33      | 53      | 72      | 119     | 186     | 205     | 187     | 85       | 48    | 1000  | 2165                                       | 365    |
| Mizoram           | 380                                         | 2                                         | 0       | 0       | 17      | 1       | 35      | 55      | 108     | 225     | 241     | 160      | 155   | 1000  | 511                                        | 370    |
| Nagaland          | 533                                         | 0                                         | 0       | 0       | 0       | 0       | 4       | 12      | 56      | 92      | 207     | 338      | 291   | 1000  | 714                                        | 201    |

Continued



Table (7): Number per 1000 of households having pet animals and per 1000 distribution of such households by mpce class for each State/UT

| state/ut          | number per 1000 of hhs. having a pet animal | households with pet animals in mpce class |         |         |         |         |         |         |         |         |         |          |       |       | Rural+Urban households having a pet animal |        |
|-------------------|---------------------------------------------|-------------------------------------------|---------|---------|---------|---------|---------|---------|---------|---------|---------|----------|-------|-------|--------------------------------------------|--------|
|                   |                                             | 0-235                                     | 235-265 | 265-320 | 320-365 | 365-410 | 410-460 | 460-520 | 520-605 | 605-730 | 730-980 | 980-1285 | 1285+ | total | estd. no. (00)                             | sample |
|                   |                                             | (3)                                       | (4)     | (5)     | (6)     | (7)     | (8)     | (9)     | (10)    | (11)    | (12)    | (13)     | (14)  | (15)  | (16)                                       | (17)   |
| (1)               | (2)                                         | (3)                                       | (4)     | (5)     | (6)     | (7)     | (8)     | (9)     | (10)    | (11)    | (12)    | (13)     | (14)  | (15)  | (16)                                       | (17)   |
| Orissa            | 62                                          | 216                                       | 152     | 104     | 119     | 92      | 54      | 71      | 69      | 29      | 38      | 34       | 21    | 1000  | 4588                                       | 170    |
| Punjab            | 92                                          | 0                                         | 2       | 1       | 46      | 2       | 67      | 45      | 123     | 139     | 141     | 143      | 291   | 1000  | 4379                                       | 142    |
| Rajasthan         | 69                                          | 10                                        | 23      | 52      | 37      | 77      | 85      | 84      | 152     | 149     | 163     | 52       | 117   | 1000  | 6647                                       | 243    |
| Sikkim            | 232                                         | 0                                         | 3       | 41      | 65      | 58      | 30      | 148     | 171     | 196     | 117     | 81       | 90    | 1000  | 244                                        | 126    |
| Tamil Nadu        | 89                                          | 45                                        | 14      | 25      | 44      | 82      | 101     | 106     | 68      | 115     | 229     | 83       | 89    | 1000  | 14189                                      | 388    |
| Tripura           | 303                                         | 21                                        | 58      | 102     | 78      | 119     | 136     | 140     | 111     | 99      | 83      | 31       | 23    | 1000  | 2131                                       | 312    |
| Uttaranchal       | 182                                         | 0                                         | 59      | 81      | 55      | 103     | 164     | 181     | 78      | 102     | 73      | 66       | 38    | 1000  | 3089                                       | 127    |
| Uttar Pradesh     | 79                                          | 26                                        | 51      | 113     | 77      | 125     | 98      | 126     | 110     | 92      | 86      | 56       | 40    | 1000  | 22283                                      | 783    |
| West Bengal       | 92                                          | 31                                        | 35      | 80      | 77      | 76      | 138     | 150     | 93      | 112     | 100     | 53       | 55    | 1000  | 15473                                      | 458    |
| A & N Islands     | 299                                         | 0                                         | 0       | 0       | 0       | 67      | 42      | 9       | 129     | 109     | 110     | 276      | 259   | 1000  | 223                                        | 100    |
| Chandigarh        | 17                                          | 0                                         | 0       | 0       | 23      | 0       | 0       | 0       | 0       | 102     | 86      | 0        | 789   | 1000  | 33                                         | 16     |
| Dadra & N. Haveli | 240                                         | 77                                        | 0       | 0       | 0       | 0       | 2       | 97      | 105     | 163     | 326     | 51       | 178   | 1000  | 124                                        | 29     |
| Daman & Diu       | 33                                          | 0                                         | 0       | 0       | 0       | 0       | 0       | 0       | 106     | 202     | 0       | 485      | 208   | 1000  | 12                                         | 5      |
| Lakshadweep       | 139                                         | 0                                         | 0       | 0       | 22      | 14      | 0       | 37      | 384     | 243     | 68      | 173      | 58    | 1000  | 13                                         | 30     |
| Pondicherry       | 71                                          | 58                                        | 0       | 0       | 23      | 152     | 21      | 127     | 154     | 13      | 0       | 66       | 385   | 1000  | 171                                        | 20     |
| ONES              | 398                                         | 18                                        | 18      | 32      | 39      | 57      | 76      | 119     | 137     | 168     | 155     | 101      | 79    | 1000  | 8284                                       | 2522   |
| GUTs              | 94                                          | 34                                        | 0       | 0       | 9       | 71      | 23      | 63      | 129     | 97      | 119     | 152      | 304   | 1000  | 576                                        | 200    |
| All-India         | 111                                         | 40                                        | 35      | 72      | 66      | 84      | 100     | 108     | 107     | 121     | 125     | 64       | 80    | 1000  | 220370                                     | 10529  |

Table (8): Per 1000 distribution of persons by age-group for each sex

| age-group  | sex   |         |         | estimated no. (00) |         |         | sample |         |         |
|------------|-------|---------|---------|--------------------|---------|---------|--------|---------|---------|
|            | males | females | persons | males              | females | persons | males  | females | persons |
|            | (2)   | (3)     | (4)     | (5)                | (6)     | (7)     | (8)    | (9)     | (10)    |
| 0 - 4      | 120   | 120     | 120     | 439531             | 424973  | 864504  | 7294   | 6682    | 13976   |
| 5 - 9      | 131   | 125     | 128     | 482247             | 441594  | 923841  | 7940   | 7266    | 15206   |
| 10 - 14    | 125   | 112     | 118     | 459092             | 394877  | 853969  | 7645   | 6579    | 14224   |
| 15 - 19    | 94    | 84      | 89      | 345187             | 297557  | 642744  | 6255   | 5437    | 11692   |
| 20 - 24    | 78    | 89      | 83      | 285621             | 313488  | 599110  | 5274   | 5511    | 10785   |
| 25 - 29    | 77    | 84      | 81      | 283350             | 297059  | 580409  | 4940   | 5127    | 10067   |
| 30 - 34    | 68    | 77      | 72      | 250082             | 271437  | 521518  | 4311   | 4527    | 8838    |
| 35 - 39    | 66    | 67      | 67      | 243960             | 238383  | 482343  | 4106   | 3877    | 7983    |
| 40 - 44    | 57    | 51      | 54      | 209488             | 181802  | 391290  | 3311   | 2974    | 6285    |
| 45 - 49    | 46    | 43      | 45      | 169779             | 153577  | 323357  | 2801   | 2615    | 5416    |
| 50 - 54    | 33    | 36      | 34      | 120445             | 127346  | 247791  | 2064   | 2373    | 4437    |
| 55 - 59    | 36    | 39      | 37      | 132106             | 137353  | 269458  | 2244   | 2714    | 4958    |
| 60 - 64    | 24    | 26      | 25      | 88210              | 93488   | 181698  | 2063   | 1989    | 4052    |
| 65 - 69    | 20    | 22      | 21      | 73999              | 78022   | 152021  | 1662   | 1637    | 3299    |
| 70 & above | 24    | 24      | 24      | 88987              | 83968   | 172955  | 2030   | 1803    | 3833    |
| 60 & above | 68    | 72      | 70      | 251197             | 255477  | 506675  | 5755   | 5429    | 11184   |
| total      | 1000  | 1000    | 1000    | 3672085            | 3534923 | 7207009 | 63940  | 61111   | 125051  |

Table (8): Per 1000 distribution of persons by age-group for each sex

| age-group  | sex   |         |         | estimated no. (00) |         |         | sample |         |         |
|------------|-------|---------|---------|--------------------|---------|---------|--------|---------|---------|
|            | males | females | persons | males              | females | persons | males  | females | persons |
|            | (2)   | (3)     | (4)     | (5)                | (6)     | (7)     | (8)    | (9)     | (10)    |
| 0 - 4      | 90    | 85      | 87      | 111386             | 96132   | 207518  | 3451   | 3043    | 6494    |
| 5 - 9      | 94    | 95      | 94      | 116102             | 107435  | 223537  | 3243   | 2954    | 6197    |
| 10 - 14    | 112   | 111     | 112     | 139209             | 125322  | 264531  | 3331   | 3220    | 6551    |
| 15 - 19    | 109   | 99      | 105     | 135313             | 112581  | 247894  | 3260   | 2978    | 6238    |
| 20 - 24    | 103   | 100     | 102     | 128041             | 113027  | 241068  | 3171   | 3229    | 6400    |
| 25 - 29    | 88    | 87      | 88      | 109526             | 98847   | 208373  | 3072   | 3027    | 6099    |
| 30 - 34    | 79    | 81      | 80      | 97891              | 91890   | 189781  | 2777   | 2555    | 5332    |
| 35 - 39    | 69    | 79      | 74      | 85143              | 89689   | 174831  | 2421   | 2272    | 4693    |
| 40 - 44    | 64    | 64      | 64      | 79151              | 72469   | 151620  | 2013   | 1745    | 3758    |
| 45 - 49    | 55    | 49      | 52      | 68406              | 56058   | 124464  | 1637   | 1521    | 3158    |
| 50 - 54    | 40    | 43      | 42      | 50018              | 49059   | 99077   | 1222   | 1356    | 2578    |
| 55 - 59    | 36    | 38      | 37      | 44314              | 42763   | 87077   | 1141   | 1402    | 2543    |
| 60 - 64    | 22    | 23      | 22      | 26814              | 26477   | 53291   | 1104   | 1068    | 2172    |
| 65 - 69    | 17    | 19      | 18      | 21098              | 21801   | 42899   | 890    | 901     | 1791    |
| 70 & above | 21    | 26      | 24      | 26249              | 29806   | 56055   | 1081   | 1183    | 2264    |
| 60 & above | 60    | 69      | 64      | 74161              | 78084   | 152245  | 3075   | 3152    | 6227    |
| total      | 1000  | 1000    | 1000    | 1238660            | 1133354 | 2372014 | 33814  | 32454   | 66268   |

Table (8): Per 1000 distribution of persons by age-group for each sex

| age-group  | sex   |         |         | estimated no. (00) |         |         | sample |         |         |
|------------|-------|---------|---------|--------------------|---------|---------|--------|---------|---------|
|            | males | females | persons | males              | females | persons | males  | females | persons |
|            | (2)   | (3)     | (4)     | (5)                | (6)     | (7)     | (8)    | (9)     | (10)    |
| 0 - 4      | 112   | 112     | 112     | 550916             | 521105  | 1072021 | 10745  | 9725    | 20470   |
| 5 - 9      | 122   | 118     | 120     | 598349             | 549029  | 1147378 | 11183  | 10220   | 21403   |
| 10 - 14    | 122   | 111     | 117     | 598301             | 520199  | 1118500 | 10976  | 9799    | 20775   |
| 15 - 19    | 98    | 88      | 93      | 480500             | 410138  | 890638  | 9515   | 8415    | 17930   |
| 20 - 24    | 84    | 91      | 88      | 413663             | 426515  | 840177  | 8445   | 8740    | 17185   |
| 25 - 29    | 80    | 85      | 82      | 392876             | 395906  | 788782  | 8012   | 8154    | 16166   |
| 30 - 34    | 71    | 78      | 74      | 347973             | 363326  | 711299  | 7088   | 7082    | 14170   |
| 35 - 39    | 67    | 70      | 69      | 329103             | 328072  | 657174  | 6527   | 6149    | 12676   |
| 40 - 44    | 59    | 54      | 57      | 288639             | 254271  | 542910  | 5324   | 4719    | 10043   |
| 45 - 49    | 49    | 45      | 47      | 238185             | 209636  | 447821  | 4438   | 4136    | 8574    |
| 50 - 54    | 35    | 38      | 36      | 170463             | 176405  | 346868  | 3286   | 3729    | 7015    |
| 55 - 59    | 36    | 39      | 37      | 176419             | 180116  | 356535  | 3385   | 4116    | 7501    |
| 60 - 64    | 23    | 26      | 25      | 115024             | 119965  | 234989  | 3167   | 3057    | 6224    |
| 65 - 69    | 19    | 21      | 20      | 95098              | 99822   | 194920  | 2552   | 2538    | 5090    |
| 70 & above | 23    | 24      | 24      | 115236             | 113774  | 229010  | 3111   | 2986    | 6097    |
| 60 & above | 66    | 71      | 69      | 325358             | 333562  | 658920  | 8830   | 8581    | 17411   |
| total      | 1000  | 1000    | 1000    | 4910745            | 4668277 | 9579022 | 97754  | 93565   | 191319  |

Table (8): Per 1000 distribution of persons by age-group for each sex

| age-group  | sex   |         |         | estimated no. (00) |         |         | sample |         |         |
|------------|-------|---------|---------|--------------------|---------|---------|--------|---------|---------|
|            | males | females | persons | males              | females | persons | males  | females | persons |
|            | (2)   | (3)     | (4)     | (5)                | (6)     | (7)     | (8)    | (9)     | (10)    |
| 0 - 4      | 118   | 119     | 118     | 427298             | 413377  | 840675  | 7183   | 6814    | 13997   |
| 5 - 9      | 132   | 125     | 129     | 477580             | 435852  | 913432  | 8049   | 7430    | 15479   |
| 10 - 14    | 126   | 114     | 120     | 453180             | 397420  | 850600  | 7687   | 6781    | 14468   |
| 15 - 19    | 98    | 86      | 92      | 352467             | 300992  | 653459  | 6336   | 5531    | 11867   |
| 20 - 24    | 77    | 86      | 81      | 276053             | 300635  | 576688  | 5194   | 5526    | 10720   |
| 25 - 29    | 76    | 83      | 79      | 272739             | 289370  | 562109  | 4979   | 5171    | 10150   |
| 30 - 34    | 66    | 79      | 72      | 238709             | 275255  | 513965  | 4269   | 4547    | 8816    |
| 35 - 39    | 69    | 65      | 67      | 250141             | 228068  | 478209  | 4186   | 3851    | 8037    |
| 40 - 44    | 51    | 52      | 52      | 185572             | 181834  | 367406  | 3204   | 3068    | 6272    |
| 45 - 49    | 46    | 43      | 45      | 166336             | 149799  | 316135  | 2776   | 2627    | 5403    |
| 50 - 54    | 36    | 38      | 37      | 128734             | 134017  | 262751  | 2152   | 2415    | 4567    |
| 55 - 59    | 34    | 39      | 37      | 124401             | 136028  | 260428  | 2210   | 2657    | 4867    |
| 60 - 64    | 27    | 26      | 26      | 97145              | 89899   | 187043  | 2137   | 1982    | 4119    |
| 65 - 69    | 19    | 21      | 20      | 69521              | 71750   | 141271  | 1600   | 1564    | 3164    |
| 70 & above | 25    | 23      | 24      | 88645              | 81705   | 170351  | 2036   | 1762    | 3798    |
| 60 & above | 71    | 70      | 70      | 255311             | 243354  | 498665  | 5773   | 5308    | 11081   |
| total      | 1000  | 1000    | 1000    | 3608520            | 3486002 | 7094522 | 63998  | 61726   | 125724  |

Table (8): Per 1000 distribution of persons by age-group for each sex

| age-group  | sex   |         |         | estimated no. (00) |         |         | sample |         |         |
|------------|-------|---------|---------|--------------------|---------|---------|--------|---------|---------|
|            | males | females | persons | males              | females | persons | males  | females | persons |
|            | (2)   | (3)     | (4)     | (5)                | (6)     | (7)     | (8)    | (9)     | (10)    |
| 0 - 4      | 91    | 84      | 88      | 119253             | 100925  | 220178  | 3524   | 3058    | 6582    |
| 5 - 9      | 98    | 98      | 98      | 128446             | 117550  | 245996  | 3308   | 2967    | 6275    |
| 10 - 14    | 112   | 109     | 110     | 145752             | 130573  | 276326  | 3311   | 3059    | 6370    |
| 15 - 19    | 110   | 100     | 105     | 143172             | 120048  | 263220  | 3359   | 2996    | 6355    |
| 20 - 24    | 96    | 104     | 100     | 125917             | 124934  | 250851  | 3167   | 3315    | 6482    |
| 25 - 29    | 85    | 85      | 85      | 110759             | 101530  | 212289  | 2946   | 3066    | 6012    |
| 30 - 34    | 79    | 82      | 80      | 102972             | 98517   | 201490  | 2847   | 2464    | 5311    |
| 35 - 39    | 74    | 77      | 75      | 96091              | 92401   | 188492  | 2352   | 2173    | 4525    |
| 40 - 44    | 61    | 61      | 61      | 80218              | 72683   | 152901  | 1916   | 1740    | 3656    |
| 45 - 49    | 54    | 51      | 53      | 71076              | 60778   | 131854  | 1634   | 1525    | 3159    |
| 50 - 54    | 40    | 40      | 40      | 52052              | 47370   | 99423   | 1275   | 1307    | 2582    |
| 55 - 59    | 36    | 38      | 37      | 46800              | 45094   | 91893   | 1174   | 1473    | 2647    |
| 60 - 64    | 21    | 26      | 23      | 27997              | 30779   | 58777   | 1095   | 1088    | 2183    |
| 65 - 69    | 17    | 22      | 20      | 22756              | 26263   | 49019   | 829    | 937     | 1766    |
| 70 & above | 25    | 25      | 25      | 32588              | 29591   | 62179   | 1223   | 1167    | 2390    |
| 60 & above | 64    | 72      | 68      | 83341              | 86634   | 169975  | 3147   | 3192    | 6339    |
| total      | 1000  | 1000    | 1000    | 1305850            | 1199038 | 2504888 | 33960  | 32335   | 66295   |

Table (8): Per 1000 distribution of persons by age-group for each sex

| age-group  | sex   |         |         | estimated no. (00) |         |         | sample |         |         |
|------------|-------|---------|---------|--------------------|---------|---------|--------|---------|---------|
|            | males | females | persons | males              | females | persons | males  | females | persons |
|            | (2)   | (3)     | (4)     | (5)                | (6)     | (7)     | (8)    | (9)     | (10)    |
| 0 - 4      | 111   | 110     | 111     | 546551             | 514302  | 1060853 | 10707  | 9872    | 20579   |
| 5 - 9      | 123   | 118     | 121     | 606026             | 553402  | 1159428 | 11357  | 10397   | 21754   |
| 10 - 14    | 122   | 113     | 117     | 598932             | 527993  | 1126925 | 10998  | 9840    | 20838   |
| 15 - 19    | 101   | 90      | 95      | 495639             | 421041  | 916680  | 9695   | 8527    | 18222   |
| 20 - 24    | 82    | 91      | 86      | 401970             | 425569  | 827539  | 8361   | 8841    | 17202   |
| 25 - 29    | 78    | 83      | 81      | 383497             | 390900  | 774398  | 7925   | 8237    | 16162   |
| 30 - 34    | 70    | 80      | 75      | 341682             | 373773  | 715454  | 7116   | 7011    | 14127   |
| 35 - 39    | 70    | 68      | 69      | 346232             | 320469  | 666702  | 6538   | 6024    | 12562   |
| 40 - 44    | 54    | 54      | 54      | 265790             | 254517  | 520307  | 5120   | 4808    | 9928    |
| 45 - 49    | 48    | 45      | 47      | 237413             | 210577  | 447990  | 4410   | 4152    | 8562    |
| 50 - 54    | 37    | 39      | 38      | 180786             | 181388  | 362173  | 3427   | 3722    | 7149    |
| 55 - 59    | 35    | 39      | 37      | 171200             | 181121  | 352322  | 3384   | 4130    | 7514    |
| 60 - 64    | 25    | 26      | 26      | 125142             | 120678  | 245820  | 3232   | 3070    | 6302    |
| 65 - 69    | 19    | 21      | 20      | 92277              | 98013   | 190290  | 2429   | 2501    | 4930    |
| 70 & above | 25    | 24      | 24      | 121233             | 111296  | 232529  | 3259   | 2929    | 6188    |
| 60 & above | 69    | 70      | 70      | 338652             | 329988  | 668639  | 8920   | 8500    | 17420   |
| total      | 1000  | 1000    | 1000    | 4914370            | 4685040 | 9599410 | 97958  | 94061   | 192019  |

Table (8): Per 1000 distribution of persons by age-group for each sex

| age-group  | sex   |         |         | estimated no. (00) |         |         | sample |         |         |
|------------|-------|---------|---------|--------------------|---------|---------|--------|---------|---------|
|            | males | females | persons | males              | females | persons | males  | females | persons |
|            | (2)   | (3)     | (4)     | (5)                | (6)     | (7)     | (8)    | (9)     | (10)    |
| 0 - 4      | 119   | 119     | 119     | 433414             | 419175  | 852589  | 14477  | 13496   | 27973   |
| 5 - 9      | 132   | 125     | 128     | 479914             | 438723  | 918637  | 15989  | 14696   | 30685   |
| 10 - 14    | 125   | 113     | 119     | 456136             | 396149  | 852284  | 15332  | 13360   | 28692   |
| 15 - 19    | 96    | 85      | 91      | 348827             | 299275  | 648102  | 12591  | 10968   | 23559   |
| 20 - 24    | 77    | 87      | 82      | 280837             | 307061  | 587899  | 10468  | 11037   | 21505   |
| 25 - 29    | 76    | 84      | 80      | 278044             | 293214  | 571259  | 9919   | 10298   | 20217   |
| 30 - 34    | 67    | 78      | 72      | 244395             | 273346  | 517741  | 8580   | 9074    | 17654   |
| 35 - 39    | 68    | 66      | 67      | 247051             | 233226  | 480276  | 8292   | 7728    | 16020   |
| 40 - 44    | 54    | 52      | 53      | 197530             | 181818  | 379348  | 6515   | 6042    | 12557   |
| 45 - 49    | 46    | 43      | 45      | 168058             | 151688  | 319746  | 5577   | 5242    | 10819   |
| 50 - 54    | 34    | 37      | 36      | 124589             | 130681  | 255271  | 4216   | 4788    | 9004    |
| 55 - 59    | 35    | 39      | 37      | 128253             | 136690  | 264943  | 4454   | 5371    | 9825    |
| 60 - 64    | 25    | 26      | 26      | 92678              | 91693   | 184371  | 4200   | 3971    | 8171    |
| 65 - 69    | 20    | 21      | 21      | 71760              | 74886   | 146646  | 3262   | 3201    | 6463    |
| 70 & above | 24    | 24      | 24      | 88816              | 82836   | 171653  | 4066   | 3565    | 7631    |
| 60 & above | 70    | 71      | 70      | 253254             | 249416  | 502670  | 11528  | 10737   | 22265   |
| total      | 1000  | 1000    | 1000    | 3640303            | 3510463 | 7150765 | 127938 | 122837  | 250775  |

Table (8): Per 1000 distribution of persons by age-group for each sex

| age-group  | sex   |         |         | estimated no. (00) |         |         | sample |         |         |
|------------|-------|---------|---------|--------------------|---------|---------|--------|---------|---------|
|            | males | females | persons | males              | females | persons | males  | females | persons |
|            | (2)   | (3)     | (4)     | (5)                | (6)     | (7)     | (8)    | (9)     | (10)    |
| 0 - 4      | 91    | 84      | 88      | 115319             | 98529   | 213848  | 6975   | 6101    | 13076   |
| 5 - 9      | 96    | 96      | 96      | 122274             | 112492  | 234766  | 6551   | 5921    | 12472   |
| 10 - 14    | 112   | 110     | 111     | 142481             | 127947  | 270428  | 6642   | 6279    | 12921   |
| 15 - 19    | 109   | 100     | 105     | 139243             | 116314  | 255557  | 6619   | 5974    | 12593   |
| 20 - 24    | 100   | 102     | 101     | 126979             | 118980  | 245959  | 6338   | 6544    | 12882   |
| 25 - 29    | 87    | 86      | 86      | 110142             | 100189  | 210331  | 6018   | 6093    | 12111   |
| 30 - 34    | 79    | 82      | 80      | 100432             | 95203   | 195635  | 5624   | 5019    | 10643   |
| 35 - 39    | 71    | 78      | 74      | 90617              | 91045   | 181662  | 4773   | 4445    | 9218    |
| 40 - 44    | 63    | 62      | 62      | 79685              | 72576   | 152260  | 3929   | 3485    | 7414    |
| 45 - 49    | 55    | 50      | 53      | 69741              | 58418   | 128159  | 3271   | 3046    | 6317    |
| 50 - 54    | 40    | 41      | 41      | 51035              | 48215   | 99250   | 2497   | 2663    | 5160    |
| 55 - 59    | 36    | 38      | 37      | 45557              | 43928   | 89485   | 2315   | 2875    | 5190    |
| 60 - 64    | 22    | 25      | 23      | 27406              | 28628   | 56034   | 2199   | 2156    | 4355    |
| 65 - 69    | 17    | 21      | 19      | 21927              | 24032   | 45959   | 1719   | 1838    | 3557    |
| 70 & above | 23    | 25      | 24      | 29418              | 29699   | 59117   | 2304   | 2350    | 4654    |
| 60 & above | 62    | 71      | 66      | 78751              | 82359   | 161110  | 6222   | 6344    | 12566   |
| total      | 1000  | 1000    | 1000    | 1272255            | 1166196 | 2438451 | 67774  | 64789   | 132563  |

Table (8): Per 1000 distribution of persons by age-group for each sex

| age-group  | sex   |         |         | estimated no. (00) |         |         | sample |         |         |
|------------|-------|---------|---------|--------------------|---------|---------|--------|---------|---------|
|            | males | females | persons | males              | females | persons | males  | females | persons |
|            | (2)   | (3)     | (4)     | (5)                | (6)     | (7)     | (8)    | (9)     | (10)    |
| 0 - 4      | 112   | 111     | 111     | 548734             | 517704  | 1066437 | 21452  | 19597   | 41049   |
| 5 - 9      | 123   | 118     | 120     | 602188             | 551215  | 1153403 | 22540  | 20617   | 43157   |
| 10 - 14    | 122   | 112     | 117     | 598616             | 524096  | 1122712 | 21974  | 19639   | 41613   |
| 15 - 19    | 99    | 89      | 94      | 488070             | 415589  | 903659  | 19210  | 16942   | 36152   |
| 20 - 24    | 83    | 91      | 87      | 407816             | 426042  | 833858  | 16806  | 17581   | 34387   |
| 25 - 29    | 79    | 84      | 82      | 388187             | 393403  | 781590  | 15937  | 16391   | 32328   |
| 30 - 34    | 70    | 79      | 74      | 344827             | 368549  | 713377  | 14204  | 14093   | 28297   |
| 35 - 39    | 69    | 69      | 69      | 337667             | 324271  | 661938  | 13065  | 12173   | 25238   |
| 40 - 44    | 56    | 54      | 55      | 277215             | 254394  | 531609  | 10444  | 9527    | 19971   |
| 45 - 49    | 48    | 45      | 47      | 237799             | 210106  | 447905  | 8848   | 8288    | 17136   |
| 50 - 54    | 36    | 38      | 37      | 175624             | 178896  | 354521  | 6713   | 7451    | 14164   |
| 55 - 59    | 35    | 39      | 37      | 173810             | 180618  | 354428  | 6769   | 8246    | 15015   |
| 60 - 64    | 24    | 26      | 25      | 120083             | 120321  | 240405  | 6399   | 6127    | 12526   |
| 65 - 69    | 19    | 21      | 20      | 93687              | 98918   | 192605  | 4981   | 5039    | 10020   |
| 70 & above | 24    | 24      | 24      | 118235             | 112535  | 230770  | 6370   | 5915    | 12285   |
| 60 & above | 68    | 71      | 69      | 332005             | 331775  | 663779  | 17750  | 17081   | 34831   |
| total      | 1000  | 1000    | 1000    | 4912558            | 4676658 | 9589216 | 195712 | 187626  | 383338  |

Table (9): Per 1000 distribution of persons of age 5 years and above by general educational level for each age-group and sex

| All-India<br>age-group                | Rural        |                                     |                  |              |        |                |                          |                                            |               |                                   |      | Male    |                                                       |                           |        |
|---------------------------------------|--------------|-------------------------------------|------------------|--------------|--------|----------------|--------------------------|--------------------------------------------|---------------|-----------------------------------|------|---------|-------------------------------------------------------|---------------------------|--------|
|                                       | not literate | general educational level           |                  |              |        |                |                          |                                            |               |                                   | n.r. | total   | per 1000<br>no. of<br>persons in<br>the age-<br>group | number of persons<br>(5+) |        |
|                                       |              | without<br>formal<br>school-<br>ing | below<br>primary | pri-<br>mary | middle | second-<br>ary | higher<br>second-<br>ary | diploma<br>/<br>certifi-<br>cate<br>course | gra-<br>duate | post-<br>gra-<br>duate &<br>above |      |         |                                                       | estd.<br>(00)             | sample |
| (1)                                   | (2)          | (3)                                 | (4)              | (5)          | (6)    | (7)            | (8)                      | (9)                                        | (10)          | (11)                              | (12) | (13)    | (14)                                                  | (15)                      | (16)   |
| 5-9                                   | 394          | 23                                  | 554              | 27           | 0      | 0              | 0                        | 0                                          | 0             | 0                                 | 2    | 1000    | 150                                                   | 479914                    | 15989  |
| 10-14                                 | 111          | 5                                   | 304              | 426          | 153    | 1              | 0                        | 0                                          | 0             | 0                                 | 0    | 1000    | 142                                                   | 456136                    | 15332  |
| 15-19                                 | 143          | 4                                   | 78               | 203          | 371    | 151            | 48                       | 2                                          | 1             | 0                                 | 0    | 1000    | 109                                                   | 348827                    | 12591  |
| 20-24                                 | 188          | 5                                   | 74               | 172          | 281    | 127            | 105                      | 8                                          | 35            | 6                                 | 0    | 1000    | 88                                                    | 280837                    | 10468  |
| 25-29                                 | 235          | 8                                   | 82               | 159          | 245    | 136            | 70                       | 7                                          | 46            | 11                                | 0    | 1000    | 87                                                    | 278044                    | 9919   |
| 30-34                                 | 299          | 11                                  | 95               | 153          | 206    | 105            | 65                       | 8                                          | 47            | 12                                | 0    | 1000    | 76                                                    | 244395                    | 8580   |
| 35-39                                 | 360          | 14                                  | 103              | 157          | 187    | 86             | 41                       | 5                                          | 36            | 10                                | 0    | 1000    | 77                                                    | 247051                    | 8292   |
| 40-44                                 | 392          | 16                                  | 110              | 162          | 165    | 78             | 36                       | 3                                          | 32            | 7                                 | 0    | 1000    | 62                                                    | 197530                    | 6515   |
| 45-49                                 | 419          | 15                                  | 106              | 157          | 154    | 82             | 28                       | 4                                          | 30            | 6                                 | 0    | 1000    | 52                                                    | 168058                    | 5577   |
| 50-54                                 | 456          | 16                                  | 121              | 139          | 133    | 82             | 30                       | 4                                          | 16            | 3                                 | 0    | 1000    | 39                                                    | 124589                    | 4216   |
| 55-59                                 | 498          | 17                                  | 115              | 149          | 103    | 67             | 19                       | 5                                          | 21            | 6                                 | 1    | 1000    | 40                                                    | 128253                    | 4454   |
| 60 & above                            | 588          | 23                                  | 124              | 122          | 74     | 44             | 11                       | 2                                          | 9             | 2                                 | 0    | 1000    | 79                                                    | 253254                    | 11528  |
| 15 & above                            | 329          | 12                                  | 97               | 161          | 211    | 102            | 49                       | 5                                          | 27            | 6                                 | 0    | 1000    | 708                                                   | 2270839                   | 82140  |
| 7 & above                             | 285          | 12                                  | 186              | 190          | 183    | 77             | 37                       | 4                                          | 20            | 5                                 | 0    | 1000    | 937                                                   | 3003821                   | 106655 |
| 5 & above                             | 308          | 13                                  | 195              | 178          | 171    | 72             | 35                       | 4                                          | 19            | 4                                 | 0    | 1000    | 1000                                                  | 3206889                   | 113461 |
| estd. no. of persons<br>(age 5+) (00) | 986519       | 40156                               | 624826           | 572135       | 549809 | 232453         | 112364                   | 11376                                      | 61548         | 14134                             | 1568 | 3206889 | X                                                     | X                         | X      |
| sample persons<br>(age 5+)            | 31748        | 1671                                | 21822            | 20569        | 20319  | 9178           | 4544                     | 436                                        | 2504          | 596                               | 74   | 113461  | X                                                     | X                         | X      |



Table (9): Per 1000 distribution of persons of age 5 years and above by general educational level for each age-group and sex

| All-India<br>age-group                | Rural        |                                     |                  |              |        |                |                          |                                            |               |                                   |      | Female  |                                                       |                           |        |
|---------------------------------------|--------------|-------------------------------------|------------------|--------------|--------|----------------|--------------------------|--------------------------------------------|---------------|-----------------------------------|------|---------|-------------------------------------------------------|---------------------------|--------|
|                                       | not literate | general educational level           |                  |              |        |                |                          |                                            |               |                                   | n.r. | total   | per 1000<br>no. of<br>persons in<br>the age-<br>group | number of persons<br>(5+) |        |
|                                       |              | without<br>formal<br>school-<br>ing | below<br>primary | pri-<br>mary | middle | second-<br>ary | higher<br>second-<br>ary | diploma<br>/<br>certifi-<br>cate<br>course | gra-<br>duate | post-<br>gra-<br>duate &<br>above |      |         |                                                       | estd.<br>(00)             | sample |
| (1)                                   | (2)          | (3)                                 | (4)              | (5)          | (6)    | (7)            | (8)                      | (9)                                        | (10)          | (11)                              | (12) | (13)    | (14)                                                  | (15)                      | (16)   |
| 5-9                                   | 435          | 20                                  | 514              | 29           | 0      | 0              | 0                        | 0                                          | 0             | 0                                 | 2    | 1000    | 142                                                   | 438723                    | 14696  |
| 10-14                                 | 182          | 7                                   | 281              | 387          | 142    | 1              | 0                        | 0                                          | 0             | 0                                 | 0    | 1000    | 128                                                   | 396149                    | 13360  |
| 15-19                                 | 266          | 7                                   | 66               | 183          | 302    | 127            | 48                       | 2                                          | 0             | 0                                 | 0    | 1000    | 97                                                    | 299275                    | 10968  |
| 20-24                                 | 442          | 7                                   | 67               | 132          | 189    | 76             | 57                       | 4                                          | 22            | 4                                 | 0    | 1000    | 99                                                    | 307061                    | 11037  |
| 25-29                                 | 514          | 10                                  | 73               | 126          | 147    | 72             | 31                       | 2                                          | 20            | 5                                 | 1    | 1000    | 95                                                    | 293214                    | 10298  |
| 30-34                                 | 605          | 11                                  | 71               | 113          | 114    | 47             | 20                       | 2                                          | 14            | 3                                 | 0    | 1000    | 88                                                    | 273346                    | 9074   |
| 35-39                                 | 659          | 8                                   | 67               | 107          | 96     | 36             | 12                       | 1                                          | 10            | 3                                 | 0    | 1000    | 75                                                    | 233226                    | 7728   |
| 40-44                                 | 693          | 13                                  | 67               | 103          | 77     | 29             | 10                       | 0                                          | 5             | 1                                 | 1    | 1000    | 59                                                    | 181818                    | 6042   |
| 45-49                                 | 723          | 9                                   | 69               | 108          | 60     | 19             | 4                        | 1                                          | 5             | 1                                 | 0    | 1000    | 49                                                    | 151688                    | 5242   |
| 50-54                                 | 776          | 9                                   | 69               | 78           | 43     | 16             | 3                        | 0                                          | 4             | 1                                 | 0    | 1000    | 42                                                    | 130681                    | 4788   |
| 55-59                                 | 846          | 9                                   | 52               | 50           | 32     | 6              | 1                        | 1                                          | 2             | 0                                 | 0    | 1000    | 44                                                    | 136690                    | 5371   |
| 60 & above                            | 888          | 9                                   | 42               | 39           | 13     | 5              | 1                        | 1                                          | 1             | 0                                 | 0    | 1000    | 81                                                    | 249416                    | 10737  |
| 15 & above                            | 602          | 9                                   | 65               | 111          | 125    | 51             | 23                       | 2                                          | 9             | 2                                 | 0    | 1000    | 730                                                   | 2256416                   | 81285  |
| 7 & above                             | 516          | 10                                  | 146              | 143          | 116    | 40             | 18                       | 1                                          | 7             | 1                                 | 1    | 1000    | 939                                                   | 2904146                   | 103124 |
| 5 & above                             | 525          | 10                                  | 156              | 134          | 109    | 38             | 17                       | 1                                          | 7             | 2                                 | 1    | 1000    | 1000                                                  | 3091287                   | 109341 |
| estd. no. of persons<br>(age 5+) (00) | 1622316      | 32042                               | 482949           | 415604       | 337544 | 116571         | 52533                    | 3882                                       | 21398         | 4791                              | 1657 | 3091287 | X                                                     | X                         | X      |
| sample persons<br>(age 5+)            | 53751        | 1444                                | 17578            | 15441        | 12932  | 4786           | 2120                     | 159                                        | 853           | 208                               | 69   | 109341  | X                                                     | X                         | X      |

Table (9): Per 1000 distribution of persons of age 5 years and above by general educational level for each age-group and sex

| All-India<br>age-group                | Rural        |                                     |                  |              |        |                |                          |                                            |               |                                   |      | Person  |                                                       |                           |        |
|---------------------------------------|--------------|-------------------------------------|------------------|--------------|--------|----------------|--------------------------|--------------------------------------------|---------------|-----------------------------------|------|---------|-------------------------------------------------------|---------------------------|--------|
|                                       | not literate | general educational level           |                  |              |        |                |                          |                                            |               |                                   | n.r. | total   | per 1000<br>no. of<br>persons in<br>the age-<br>group | number of persons<br>(5+) |        |
|                                       |              | without<br>formal<br>school-<br>ing | below<br>primary | pri-<br>mary | middle | second-<br>ary | higher<br>second-<br>ary | diploma<br>/<br>certifi-<br>cate<br>course | gra-<br>duate | post-<br>gra-<br>duate &<br>above |      |         |                                                       | estd.<br>(00)             | sample |
| (1)                                   | (2)          | (3)                                 | (4)              | (5)          | (6)    | (7)            | (8)                      | (9)                                        | (10)          | (11)                              | (12) | (13)    | (14)                                                  | (15)                      | (16)   |
| 5-9                                   | 414          | 22                                  | 535              | 28           | 0      | 0              | 0                        | 0                                          | 0             | 0                                 | 2    | 1000    | 146                                                   | 918637                    | 30685  |
| 10-14                                 | 144          | 6                                   | 294              | 407          | 148    | 1              | 0                        | 0                                          | 0             | 0                                 | 0    | 1000    | 135                                                   | 852284                    | 28692  |
| 15-19                                 | 200          | 6                                   | 72               | 194          | 339    | 140            | 48                       | 2                                          | 0             | 0                                 | 0    | 1000    | 103                                                   | 648102                    | 23559  |
| 20-24                                 | 321          | 6                                   | 70               | 151          | 233    | 100            | 80                       | 6                                          | 28            | 5                                 | 0    | 1000    | 93                                                    | 587899                    | 21505  |
| 25-29                                 | 378          | 9                                   | 78               | 142          | 195    | 103            | 50                       | 5                                          | 32            | 8                                 | 0    | 1000    | 91                                                    | 571259                    | 20217  |
| 30-34                                 | 460          | 11                                  | 82               | 132          | 158    | 74             | 41                       | 5                                          | 29            | 7                                 | 0    | 1000    | 82                                                    | 517741                    | 17654  |
| 35-39                                 | 505          | 11                                  | 86               | 133          | 143    | 62             | 27                       | 3                                          | 23            | 7                                 | 0    | 1000    | 76                                                    | 480276                    | 16020  |
| 40-44                                 | 536          | 15                                  | 89               | 134          | 122    | 55             | 23                       | 2                                          | 19            | 4                                 | 0    | 1000    | 60                                                    | 379348                    | 12557  |
| 45-49                                 | 563          | 12                                  | 88               | 134          | 110    | 52             | 16                       | 3                                          | 18            | 3                                 | 0    | 1000    | 51                                                    | 319746                    | 10819  |
| 50-54                                 | 620          | 13                                  | 94               | 108          | 87     | 48             | 16                       | 2                                          | 10            | 2                                 | 0    | 1000    | 41                                                    | 255271                    | 9004   |
| 55-59                                 | 678          | 13                                  | 82               | 98           | 66     | 36             | 10                       | 3                                          | 11            | 3                                 | 0    | 1000    | 42                                                    | 264943                    | 9825   |
| 60 & above                            | 737          | 16                                  | 84               | 81           | 44     | 25             | 6                        | 2                                          | 5             | 1                                 | 0    | 1000    | 80                                                    | 502670                    | 22265  |
| 15 & above                            | 465          | 10                                  | 81               | 136          | 168    | 77             | 36                       | 3                                          | 18            | 4                                 | 0    | 1000    | 719                                                   | 4527255                   | 163425 |
| 7 & above                             | 399          | 11                                  | 166              | 167          | 150    | 59             | 28                       | 3                                          | 14            | 3                                 | 0    | 1000    | 938                                                   | 5907967                   | 209779 |
| 5 & above                             | 414          | 11                                  | 176              | 157          | 141    | 55             | 26                       | 2                                          | 13            | 3                                 | 1    | 1000    | 1000                                                  | 6298176                   | 222802 |
| estd. no. of persons<br>(age 5+) (00) | 2608835      | 72199                               | 1107775          | 987739       | 887353 | 349024         | 164898                   | 15258                                      | 82947         | 18925                             | 3225 | 6298176 | X                                                     | X                         | X      |
| sample persons<br>(age 5+)            | 85499        | 3115                                | 39400            | 36010        | 33251  | 13964          | 6664                     | 595                                        | 3357          | 804                               | 143  | 222802  | X                                                     | X                         | X      |

Table (9): Per 1000 distribution of persons of age 5 years and above by general educational level for each age-group and sex

| All-India<br>age-group                | Urban        |                                     |                  |              |        |                |                          |                                            |               |                                   |      | per 1000<br>no. of<br>persons in<br>the age-<br>group | Male  |                           |        |
|---------------------------------------|--------------|-------------------------------------|------------------|--------------|--------|----------------|--------------------------|--------------------------------------------|---------------|-----------------------------------|------|-------------------------------------------------------|-------|---------------------------|--------|
|                                       | not literate | general educational level           |                  |              |        |                |                          |                                            |               |                                   | n.r. |                                                       | total | number of persons<br>(5+) |        |
|                                       |              | without<br>formal<br>school-<br>ing | below<br>primary | pri-<br>mary | middle | second-<br>ary | higher<br>second-<br>ary | diploma<br>/<br>certifi-<br>cate<br>course | gra-<br>duate | post-<br>gra-<br>duate &<br>above |      |                                                       |       | estd.<br>(00)             | sample |
| (1)                                   | (2)          | (3)                                 | (4)              | (5)          | (6)    | (7)            | (8)                      | (9)                                        | (10)          | (11)                              | (12) | (13)                                                  | (14)  | (15)                      | (16)   |
| 5-9                                   | 251          | 22                                  | 676              | 49           | 0      | 0              | 0                        | 0                                          | 0             | 0                                 | 2    | 1000                                                  | 106   | 122274                    | 6551   |
| 10-14                                 | 63           | 5                                   | 224              | 453          | 253    | 1              | 0                        | 0                                          | 0             | 0                                 | 1    | 1000                                                  | 123   | 142481                    | 6642   |
| 15-19                                 | 76           | 3                                   | 50               | 155          | 332    | 248            | 131                      | 4                                          | 1             | 0                                 | 0    | 1000                                                  | 120   | 139243                    | 6619   |
| 20-24                                 | 79           | 6                                   | 38               | 132          | 238    | 149            | 207                      | 12                                         | 128           | 12                                | 0    | 1000                                                  | 110   | 126979                    | 6338   |
| 25-29                                 | 96           | 4                                   | 56               | 112          | 217    | 154            | 118                      | 27                                         | 169           | 48                                | 0    | 1000                                                  | 95    | 110142                    | 6018   |
| 30-34                                 | 108          | 7                                   | 68               | 118          | 217    | 144            | 100                      | 22                                         | 166           | 51                                | 0    | 1000                                                  | 87    | 100432                    | 5624   |
| 35-39                                 | 153          | 5                                   | 60               | 126          | 180    | 141            | 86                       | 26                                         | 174           | 48                                | 0    | 1000                                                  | 78    | 90617                     | 4773   |
| 40-44                                 | 167          | 9                                   | 63               | 139          | 172    | 146            | 95                       | 15                                         | 138           | 55                                | 0    | 1000                                                  | 69    | 79685                     | 3929   |
| 45-49                                 | 148          | 4                                   | 87               | 108          | 168    | 164            | 72                       | 17                                         | 163           | 68                                | 0    | 1000                                                  | 60    | 69741                     | 3271   |
| 50-54                                 | 137          | 12                                  | 61               | 138          | 138    | 156            | 74                       | 25                                         | 176           | 81                                | 0    | 1000                                                  | 44    | 51035                     | 2497   |
| 55-59                                 | 186          | 10                                  | 81               | 145          | 144    | 148            | 74                       | 18                                         | 145           | 50                                | 0    | 1000                                                  | 39    | 45557                     | 2315   |
| 60 & above                            | 232          | 22                                  | 105              | 138          | 127    | 160            | 50                       | 22                                         | 104           | 41                                | 0    | 1000                                                  | 68    | 78751                     | 6222   |
| 15 & above                            | 127          | 7                                   | 63               | 131          | 210    | 166            | 111                      | 18                                         | 127           | 39                                | 0    | 1000                                                  | 771   | 892181                    | 47606  |
| 7 & above                             | 118          | 8                                   | 131              | 169          | 202    | 134            | 89                       | 14                                         | 103           | 32                                | 0    | 1000                                                  | 957   | 1106870                   | 58031  |
| 5 & above                             | 132          | 9                                   | 148              | 162          | 193    | 128            | 86                       | 14                                         | 98            | 30                                | 0    | 1000                                                  | 1000  | 1156936                   | 60799  |
| estd. no. of persons<br>(age 5+) (00) | 152741       | 9994                                | 170775           | 187733       | 223605 | 148105         | 99000                    | 15985                                      | 113548        | 34989                             | 460  | 1156936                                               | X     | X                         | X      |
| sample persons<br>(age 5+)            | 7670         | 599                                 | 8821             | 9355         | 11949  | 8303           | 5287                     | 821                                        | 6158          | 1804                              | 32   | 60799                                                 | X     | X                         | X      |

Table (9): Per 1000 distribution of persons of age 5 years and above by general educational level for each age-group and sex

| All-India<br>age-group                | Urban        |                                     |                  |              |        |                |                          |                                            |               |                                   |      | Female  |                                                       |                           |        |
|---------------------------------------|--------------|-------------------------------------|------------------|--------------|--------|----------------|--------------------------|--------------------------------------------|---------------|-----------------------------------|------|---------|-------------------------------------------------------|---------------------------|--------|
|                                       | not literate | general educational level           |                  |              |        |                |                          |                                            |               |                                   | n.r. | total   | per 1000<br>no. of<br>persons in<br>the age-<br>group | number of persons<br>(5+) |        |
|                                       |              | without<br>formal<br>school-<br>ing | below<br>primary | pri-<br>mary | middle | second-<br>ary | higher<br>second-<br>ary | diploma<br>/<br>certifi-<br>cate<br>course | gra-<br>duate | post-<br>gra-<br>duate &<br>above |      |         |                                                       | estd.<br>(00)             | sample |
| (1)                                   | (2)          | (3)                                 | (4)              | (5)          | (6)    | (7)            | (8)                      | (9)                                        | (10)          | (11)                              | (12) | (13)    | (14)                                                  | (15)                      | (16)   |
| 5-9                                   | 277          | 21                                  | 651              | 50           | 0      | 0              | 0                        | 0                                          | 0             | 0                                 | 2    | 1000    | 105                                                   | 112492                    | 5921   |
| 10-14                                 | 72           | 6                                   | 211              | 467          | 238    | 5              | 0                        | 0                                          | 0             | 0                                 | 0    | 1000    | 120                                                   | 127947                    | 6279   |
| 15-19                                 | 98           | 1                                   | 35               | 120          | 323    | 254            | 163                      | 3                                          | 2             | 0                                 | 0    | 1000    | 109                                                   | 116314                    | 5974   |
| 20-24                                 | 158          | 6                                   | 47               | 113          | 189    | 138            | 166                      | 10                                         | 147           | 24                                | 0    | 1000    | 111                                                   | 118980                    | 6544   |
| 25-29                                 | 198          | 4                                   | 44               | 124          | 200    | 134            | 93                       | 6                                          | 142           | 54                                | 1    | 1000    | 94                                                    | 100189                    | 6093   |
| 30-34                                 | 270          | 7                                   | 49               | 104          | 180    | 126            | 79                       | 15                                         | 133           | 37                                | 0    | 1000    | 89                                                    | 95203                     | 5019   |
| 35-39                                 | 318          | 11                                  | 67               | 131          | 169    | 117            | 60                       | 5                                          | 89            | 34                                | 0    | 1000    | 85                                                    | 91045                     | 4445   |
| 40-44                                 | 326          | 9                                   | 61               | 117          | 139    | 147            | 61                       | 9                                          | 86            | 44                                | 0    | 1000    | 68                                                    | 72576                     | 3485   |
| 45-49                                 | 349          | 13                                  | 67               | 126          | 143    | 117            | 62                       | 4                                          | 95            | 25                                | 0    | 1000    | 55                                                    | 58418                     | 3046   |
| 50-54                                 | 393          | 8                                   | 74               | 118          | 127    | 120            | 48                       | 7                                          | 68            | 37                                | 0    | 1000    | 45                                                    | 48215                     | 2663   |
| 55-59                                 | 492          | 11                                  | 79               | 125          | 117    | 79             | 31                       | 3                                          | 48            | 15                                | 1    | 1000    | 41                                                    | 43928                     | 2875   |
| 60 & above                            | 584          | 21                                  | 97               | 104          | 81     | 55             | 19                       | 3                                          | 28            | 7                                 | 0    | 1000    | 77                                                    | 82359                     | 6344   |
| 15 & above                            | 287          | 8                                   | 58               | 118          | 180    | 137            | 90                       | 7                                          | 87            | 27                                | 0    | 1000    | 775                                                   | 827228                    | 46488  |
| 7 & above                             | 251          | 9                                   | 123              | 159          | 176    | 112            | 73                       | 6                                          | 71            | 22                                | 0    | 1000    | 956                                                   | 1020906                   | 56215  |
| 5 & above                             | 260          | 9                                   | 139              | 152          | 168    | 107            | 70                       | 5                                          | 68            | 21                                | 0    | 1000    | 1000                                                  | 1067667                   | 58688  |
| estd. no. of persons<br>(age 5+) (00) | 277707       | 10115                               | 148459           | 162557       | 179484 | 113917         | 74383                    | 5724                                       | 72377         | 22440                             | 504  | 1067667 | X                                                     | X                         | X      |
| sample persons<br>(age 5+)            | 14885        | 625                                 | 8174             | 8914         | 9996   | 6387           | 4139                     | 329                                        | 3942          | 1256                              | 41   | 58688   | X                                                     | X                         | X      |

Table (9): Per 1000 distribution of persons of age 5 years and above by general educational level for each age-group and sex

| All-India<br>age-group                | Urban<br>general educational level |                                     |                  |              |        |                |                          |                                            |               |                                   |      | per 1000<br>no. of<br>persons in<br>the age-<br>group | Person<br>number of persons<br>(5+) |               |        |
|---------------------------------------|------------------------------------|-------------------------------------|------------------|--------------|--------|----------------|--------------------------|--------------------------------------------|---------------|-----------------------------------|------|-------------------------------------------------------|-------------------------------------|---------------|--------|
|                                       | not literate                       | literate                            |                  |              |        |                |                          |                                            |               |                                   | n.r. |                                                       | total                               | estd.<br>(00) | sample |
|                                       |                                    | without<br>formal<br>school-<br>ing | below<br>primary | pri-<br>mary | middle | second-<br>ary | higher<br>second-<br>ary | diploma<br>/<br>certifi-<br>cate<br>course | gra-<br>duate | post-<br>gra-<br>duate &<br>above |      |                                                       |                                     |               |        |
| (1)                                   | (2)                                | (3)                                 | (4)              | (5)          | (6)    | (7)            | (8)                      | (9)                                        | (10)          | (11)                              | (12) | (13)                                                  | (14)                                | (15)          | (16)   |
| 5-9                                   | 263                                | 21                                  | 664              | 50           | 0      | 0              | 0                        | 0                                          | 0             | 0                                 | 2    | 1000                                                  | 106                                 | 234766        | 12472  |
| 10-14                                 | 67                                 | 6                                   | 218              | 460          | 246    | 3              | 0                        | 0                                          | 0             | 0                                 | 0    | 1000                                                  | 122                                 | 270428        | 12921  |
| 15-19                                 | 86                                 | 2                                   | 43               | 139          | 328    | 251            | 146                      | 4                                          | 1             | 0                                 | 0    | 1000                                                  | 115                                 | 255557        | 12593  |
| 20-24                                 | 117                                | 6                                   | 42               | 123          | 214    | 143            | 187                      | 11                                         | 137           | 18                                | 0    | 1000                                                  | 111                                 | 245959        | 12882  |
| 25-29                                 | 144                                | 4                                   | 50               | 118          | 209    | 144            | 106                      | 17                                         | 156           | 50                                | 1    | 1000                                                  | 95                                  | 210331        | 12111  |
| 30-34                                 | 187                                | 7                                   | 58               | 111          | 199    | 135            | 89                       | 19                                         | 150           | 44                                | 0    | 1000                                                  | 88                                  | 195635        | 10643  |
| 35-39                                 | 236                                | 8                                   | 63               | 129          | 175    | 129            | 73                       | 16                                         | 131           | 41                                | 0    | 1000                                                  | 82                                  | 181662        | 9218   |
| 40-44                                 | 243                                | 9                                   | 62               | 129          | 156    | 147            | 79                       | 12                                         | 114           | 49                                | 0    | 1000                                                  | 68                                  | 152260        | 7414   |
| 45-49                                 | 240                                | 8                                   | 78               | 116          | 156    | 143            | 68                       | 11                                         | 132           | 48                                | 0    | 1000                                                  | 58                                  | 128159        | 6317   |
| 50-54                                 | 261                                | 10                                  | 68               | 128          | 133    | 139            | 62                       | 16                                         | 124           | 60                                | 0    | 1000                                                  | 45                                  | 99250         | 5160   |
| 55-59                                 | 336                                | 10                                  | 80               | 135          | 131    | 114            | 53                       | 11                                         | 98            | 33                                | 1    | 1000                                                  | 40                                  | 89485         | 5190   |
| 60 & above                            | 412                                | 22                                  | 101              | 120          | 103    | 107            | 34                       | 12                                         | 65            | 23                                | 0    | 1000                                                  | 72                                  | 161110        | 12566  |
| 15 & above                            | 204                                | 8                                   | 61               | 125          | 196    | 152            | 101                      | 13                                         | 108           | 33                                | 0    | 1000                                                  | 773                                 | 1719409       | 94094  |
| 7 & above                             | 182                                | 8                                   | 127              | 164          | 189    | 123            | 81                       | 10                                         | 87            | 27                                | 0    | 1000                                                  | 956                                 | 2127777       | 114246 |
| 5 & above                             | 193                                | 9                                   | 144              | 157          | 181    | 118            | 78                       | 10                                         | 84            | 26                                | 0    | 1000                                                  | 1000                                | 2224603       | 119487 |
| estd. no. of persons<br>(age 5+) (00) | 430448                             | 20109                               | 319234           | 350291       | 403089 | 262022         | 173384                   | 21709                                      | 185925        | 57429                             | 964  | 2224603                                               | X                                   | X             | X      |
| sample persons<br>(age 5+)            | 22555                              | 1224                                | 16995            | 18269        | 21945  | 14690          | 9426                     | 1150                                       | 10100         | 3060                              | 73   | 119487                                                | X                                   | X             | X      |

Table (9): Per 1000 distribution of persons of age 5 years and above by general educational level for each age-group and sex

| age-group                             | Rural + Urban<br>general educational level |                                     |                  |              |        |                |                          |                                            |               |                                   |      | per 1000<br>no. of<br>persons in<br>the age-<br>group | Male  |                           |        |
|---------------------------------------|--------------------------------------------|-------------------------------------|------------------|--------------|--------|----------------|--------------------------|--------------------------------------------|---------------|-----------------------------------|------|-------------------------------------------------------|-------|---------------------------|--------|
|                                       | not literate                               | literate                            |                  |              |        |                |                          |                                            |               |                                   | n.r. |                                                       | total | number of persons<br>(5+) |        |
|                                       |                                            | without<br>formal<br>school-<br>ing | below<br>primary | pri-<br>mary | middle | second-<br>ary | higher<br>second-<br>ary | diploma<br>/<br>certifi-<br>cate<br>course | gra-<br>duate | post-<br>gra-<br>duate &<br>above |      |                                                       |       | estd.<br>(00)             | sample |
| (1)                                   | (2)                                        | (3)                                 | (4)              | (5)          | (6)    | (7)            | (8)                      | (9)                                        | (10)          | (11)                              | (12) | (13)                                                  | (14)  | (15)                      | (16)   |
| 5-9                                   | 365                                        | 23                                  | 579              | 31           | 0      | 0              | 0                        | 0                                          | 0             | 0                                 | 2    | 1000                                                  | 138   | 602188                    | 22540  |
| 10-14                                 | 99                                         | 5                                   | 285              | 432          | 177    | 1              | 0                        | 0                                          | 0             | 0                                 | 0    | 1000                                                  | 137   | 598616                    | 21974  |
| 15-19                                 | 124                                        | 4                                   | 70               | 189          | 359    | 179            | 72                       | 3                                          | 1             | 0                                 | 0    | 1000                                                  | 112   | 488070                    | 19210  |
| 20-24                                 | 154                                        | 5                                   | 63               | 159          | 267    | 134            | 136                      | 10                                         | 64            | 7                                 | 0    | 1000                                                  | 93    | 407816                    | 16806  |
| 25-29                                 | 196                                        | 7                                   | 75               | 146          | 237    | 141            | 84                       | 13                                         | 81            | 22                                | 0    | 1000                                                  | 89    | 388187                    | 15937  |
| 30-34                                 | 243                                        | 10                                  | 87               | 143          | 210    | 117            | 75                       | 12                                         | 82            | 23                                | 0    | 1000                                                  | 79    | 344827                    | 14204  |
| 35-39                                 | 304                                        | 12                                  | 92               | 149          | 185    | 101            | 53                       | 11                                         | 73            | 20                                | 0    | 1000                                                  | 77    | 337667                    | 13065  |
| 40-44                                 | 327                                        | 14                                  | 96               | 156          | 167    | 98             | 53                       | 6                                          | 62            | 20                                | 0    | 1000                                                  | 64    | 277215                    | 10444  |
| 45-49                                 | 339                                        | 12                                  | 100              | 143          | 158    | 106            | 41                       | 8                                          | 69            | 24                                | 0    | 1000                                                  | 54    | 237799                    | 8848   |
| 50-54                                 | 363                                        | 15                                  | 104              | 138          | 134    | 104            | 43                       | 10                                         | 63            | 26                                | 0    | 1000                                                  | 40    | 175624                    | 6713   |
| 55-59                                 | 416                                        | 15                                  | 106              | 148          | 114    | 88             | 33                       | 9                                          | 54            | 18                                | 0    | 1000                                                  | 40    | 173810                    | 6769   |
| 60 & above                            | 503                                        | 22                                  | 120              | 126          | 86     | 71             | 20                       | 7                                          | 32            | 11                                | 0    | 1000                                                  | 76    | 332005                    | 17750  |
| 15 & above                            | 272                                        | 11                                  | 87               | 153          | 211    | 120            | 67                       | 9                                          | 55            | 16                                | 0    | 1000                                                  | 725   | 3163020                   | 129746 |
| 7 & above                             | 240                                        | 11                                  | 171              | 185          | 188    | 93             | 51                       | 7                                          | 43            | 12                                | 0    | 1000                                                  | 942   | 4110691                   | 164686 |
| 5 & above                             | 261                                        | 11                                  | 182              | 174          | 177    | 87             | 48                       | 6                                          | 40            | 11                                | 0    | 1000                                                  | 1000  | 4363824                   | 174260 |
| estd. no. of persons<br>(age 5+) (00) | 1139260                                    | 50150                               | 795601           | 759868       | 773414 | 380558         | 211365                   | 27361                                      | 175096        | 49123                             | 2029 | 4363824                                               | X     | X                         | X      |
| sample persons<br>(age 5+)            | 39418                                      | 2270                                | 30643            | 29924        | 32268  | 17481          | 9831                     | 1257                                       | 8662          | 2400                              | 106  | 174260                                                | X     | X                         | X      |

Table (9): Per 1000 distribution of persons of age 5 years and above by general educational level for each age-group and sex

| All-India<br>age-group                | Rural + Urban<br>general educational level |                                     |                  |              |        |                |                          |                                            |               |                                   |      | per 1000<br>no. of<br>persons in<br>the age-<br>group | Female<br>number of persons<br>(5+) |               |        |
|---------------------------------------|--------------------------------------------|-------------------------------------|------------------|--------------|--------|----------------|--------------------------|--------------------------------------------|---------------|-----------------------------------|------|-------------------------------------------------------|-------------------------------------|---------------|--------|
|                                       | not literate                               | literate                            |                  |              |        |                |                          |                                            |               |                                   | n.r. |                                                       | total                               | estd.<br>(00) | sample |
|                                       |                                            | without<br>formal<br>school-<br>ing | below<br>primary | pri-<br>mary | middle | second-<br>ary | higher<br>second-<br>ary | diploma<br>/<br>certifi-<br>cate<br>course | gra-<br>duate | post-<br>gra-<br>duate &<br>above |      |                                                       |                                     |               |        |
| (1)                                   | (2)                                        | (3)                                 | (4)              | (5)          | (6)    | (7)            | (8)                      | (9)                                        | (10)          | (11)                              | (12) | (13)                                                  | (14)                                | (15)          | (16)   |
| 5-9                                   | 403                                        | 20                                  | 542              | 33           | 0      | 0              | 0                        | 0                                          | 0             | 0                                 | 2    | 1000                                                  | 133                                 | 551215        | 20617  |
| 10-14                                 | 155                                        | 7                                   | 264              | 406          | 166    | 2              | 0                        | 0                                          | 0             | 0                                 | 0    | 1000                                                  | 126                                 | 524096        | 19639  |
| 15-19                                 | 219                                        | 6                                   | 57               | 165          | 308    | 162            | 80                       | 2                                          | 1             | 0                                 | 0    | 1000                                                  | 100                                 | 415589        | 16942  |
| 20-24                                 | 363                                        | 7                                   | 61               | 127          | 189    | 93             | 88                       | 6                                          | 57            | 10                                | 0    | 1000                                                  | 102                                 | 426042        | 17581  |
| 25-29                                 | 433                                        | 8                                   | 66               | 125          | 160    | 88             | 47                       | 3                                          | 51            | 17                                | 1    | 1000                                                  | 95                                  | 393403        | 16391  |
| 30-34                                 | 518                                        | 10                                  | 65               | 111          | 131    | 67             | 35                       | 6                                          | 45            | 12                                | 0    | 1000                                                  | 89                                  | 368549        | 14093  |
| 35-39                                 | 563                                        | 9                                   | 67               | 113          | 116    | 59             | 26                       | 2                                          | 32            | 12                                | 0    | 1000                                                  | 78                                  | 324271        | 12173  |
| 40-44                                 | 589                                        | 12                                  | 65               | 107          | 94     | 63             | 25                       | 3                                          | 28            | 13                                | 1    | 1000                                                  | 61                                  | 254394        | 9527   |
| 45-49                                 | 619                                        | 10                                  | 68               | 113          | 83     | 46             | 20                       | 2                                          | 30            | 7                                 | 0    | 1000                                                  | 51                                  | 210106        | 8288   |
| 50-54                                 | 673                                        | 9                                   | 70               | 89           | 66     | 44             | 15                       | 2                                          | 22            | 10                                | 0    | 1000                                                  | 43                                  | 178896        | 7451   |
| 55-59                                 | 760                                        | 9                                   | 58               | 69           | 53     | 24             | 8                        | 2                                          | 13            | 4                                 | 0    | 1000                                                  | 43                                  | 180618        | 8246   |
| 60 & above                            | 813                                        | 12                                  | 56               | 55           | 30     | 17             | 6                        | 2                                          | 7             | 2                                 | 0    | 1000                                                  | 80                                  | 331775        | 17081  |
| 15 & above                            | 518                                        | 9                                   | 63               | 113          | 140    | 74             | 41                       | 3                                          | 30            | 9                                 | 0    | 1000                                                  | 741                                 | 3083643       | 127773 |
| 7 & above                             | 447                                        | 9                                   | 140              | 147          | 132    | 59             | 32                       | 2                                          | 24            | 7                                 | 0    | 1000                                                  | 944                                 | 3925053       | 159339 |
| 5 & above                             | 457                                        | 10                                  | 152              | 139          | 124    | 55             | 31                       | 2                                          | 23            | 7                                 | 1    | 1000                                                  | 1000                                | 4158955       | 168029 |
| estd. no. of persons<br>(age 5+) (00) | 1900023                                    | 42157                               | 631408           | 578161       | 517028 | 230488         | 126917                   | 9606                                       | 93775         | 27230                             | 2161 | 4158955                                               | X                                   | X             | X      |
| sample persons<br>(age 5+)            | 68636                                      | 2069                                | 25752            | 24355        | 22928  | 11173          | 6259                     | 488                                        | 4795          | 1464                              | 110  | 168029                                                | X                                   | X             | X      |



Table (9): Per 1000 distribution of persons of age 5 years and above by general educational level for each age-group and sex

| All-India<br>age-group                | Rural + Urban<br>general educational level |                                     |                  |              |         |                |                          |                                            |               |                                   |      | per 1000<br>no. of<br>persons in<br>the age-<br>group | Person<br>number of persons<br>(5+) |               |        |
|---------------------------------------|--------------------------------------------|-------------------------------------|------------------|--------------|---------|----------------|--------------------------|--------------------------------------------|---------------|-----------------------------------|------|-------------------------------------------------------|-------------------------------------|---------------|--------|
|                                       | not literate                               | literate                            |                  |              |         |                |                          |                                            |               |                                   | n.r. |                                                       | total                               | estd.<br>(00) | sample |
|                                       |                                            | without<br>formal<br>school-<br>ing | below<br>primary | pri-<br>mary | middle  | second-<br>ary | higher<br>second-<br>ary | diploma<br>/<br>certifi-<br>cate<br>course | gra-<br>duate | post-<br>gra-<br>duate &<br>above |      |                                                       |                                     |               |        |
| (1)                                   | (2)                                        | (3)                                 | (4)              | (5)          | (6)     | (7)            | (8)                      | (9)                                        | (10)          | (11)                              | (12) | (13)                                                  | (14)                                | (15)          | (16)   |
| 5-9                                   | 383                                        | 22                                  | 561              | 32           | 0       | 0              | 0                        | 0                                          | 0             | 0                                 | 2    | 1000                                                  | 135                                 | 1153403       | 43157  |
| 10-14                                 | 125                                        | 6                                   | 276              | 420          | 172     | 1              | 0                        | 0                                          | 0             | 0                                 | 0    | 1000                                                  | 132                                 | 1122712       | 41613  |
| 15-19                                 | 167                                        | 5                                   | 64               | 178          | 336     | 171            | 76                       | 2                                          | 1             | 0                                 | 0    | 1000                                                  | 106                                 | 903659        | 36152  |
| 20-24                                 | 261                                        | 6                                   | 62               | 143          | 227     | 113            | 111                      | 8                                          | 60            | 9                                 | 0    | 1000                                                  | 98                                  | 833858        | 34387  |
| 25-29                                 | 315                                        | 7                                   | 70               | 136          | 198     | 114            | 65                       | 8                                          | 66            | 19                                | 0    | 1000                                                  | 92                                  | 781590        | 32328  |
| 30-34                                 | 385                                        | 10                                  | 76               | 126          | 169     | 91             | 54                       | 9                                          | 63            | 17                                | 0    | 1000                                                  | 84                                  | 713377        | 28297  |
| 35-39                                 | 431                                        | 10                                  | 80               | 132          | 151     | 80             | 40                       | 6                                          | 53            | 16                                | 0    | 1000                                                  | 78                                  | 661938        | 25238  |
| 40-44                                 | 452                                        | 13                                  | 81               | 132          | 132     | 81             | 39                       | 5                                          | 46            | 17                                | 0    | 1000                                                  | 62                                  | 531609        | 19971  |
| 45-49                                 | 471                                        | 11                                  | 85               | 129          | 123     | 78             | 31                       | 5                                          | 51            | 16                                | 0    | 1000                                                  | 53                                  | 447905        | 17136  |
| 50-54                                 | 519                                        | 12                                  | 87               | 113          | 100     | 73             | 29                       | 6                                          | 42            | 18                                | 0    | 1000                                                  | 42                                  | 354521        | 14164  |
| 55-59                                 | 591                                        | 12                                  | 81               | 108          | 83      | 55             | 20                       | 5                                          | 33            | 11                                | 0    | 1000                                                  | 42                                  | 354428        | 15015  |
| 60 & above                            | 658                                        | 17                                  | 88               | 91           | 58      | 44             | 13                       | 4                                          | 20            | 6                                 | 0    | 1000                                                  | 78                                  | 663779        | 34831  |
| 15 & above                            | 393                                        | 10                                  | 75               | 133          | 176     | 98             | 54                       | 6                                          | 43            | 12                                | 0    | 1000                                                  | 733                                 | 6246664       | 257519 |
| 7 & above                             | 341                                        | 10                                  | 156              | 166          | 161     | 76             | 42                       | 5                                          | 33            | 10                                | 0    | 1000                                                  | 943                                 | 8035744       | 324025 |
| 5 & above                             | 357                                        | 11                                  | 167              | 157          | 151     | 72             | 40                       | 4                                          | 32            | 9                                 | 0    | 1000                                                  | 1000                                | 8522779       | 342289 |
| estd. no. of persons<br>(age 5+) (00) | 3039283                                    | 92308                               | 1427008          | 1338029      | 1290442 | 611046         | 338282                   | 36967                                      | 268871        | 76353                             | 4189 | 8522779                                               | X                                   | X             | X      |
| sample persons<br>(age 5+)            | 108054                                     | 4339                                | 56395            | 54279        | 55196   | 28654          | 16090                    | 1745                                       | 13457         | 3864                              | 216  | 342289                                                | X                                   | X             | X      |

Table (10): Per 1000 distribution of aged persons by number of living children for each sex and State/UT

| Rural<br>state/ut | aged persons with number of living children |     |     |     |     |     |     |     |            |       | Males      |        |
|-------------------|---------------------------------------------|-----|-----|-----|-----|-----|-----|-----|------------|-------|------------|--------|
|                   | 0                                           | 1   | 2   | 3   | 4   | 5   | 6-7 | 8-9 | 10 & above | total | estd. (00) | sample |
| (1)               | (2)                                         | (3) | (4) | (5) | (6) | (7) | (8) | (9) | (10)       | (11)  | (12)       | (13)   |
| Andhra Pradesh    | 60                                          | 93  | 145 | 226 | 196 | 133 | 117 | 19  | 11         | 1000  | 18730      | 697    |
| Arunachal Pradesh | 265                                         | 140 | 117 | 94  | 131 | 116 | 118 | 18  | 2          | 1000  | 238        | 140    |
| Assam             | 39                                          | 24  | 72  | 219 | 273 | 219 | 121 | 27  | 6          | 1000  | 6103       | 471    |
| Bihar             | 49                                          | 54  | 127 | 193 | 200 | 191 | 141 | 38  | 8          | 1000  | 18861      | 912    |
| Chhattisgarh      | 83                                          | 75  | 66  | 246 | 228 | 111 | 175 | 9   | 8          | 1000  | 4609       | 204    |
| Delhi             | 0                                           | 117 | 0   | 207 | 90  | 375 | 211 | 0   | 0          | 1000  | 338        | 16     |
| Goa               | 46                                          | 0   | 141 | 298 | 407 | 18  | 63  | 28  | 0          | 1000  | 506        | 19     |
| Gujarat           | 33                                          | 47  | 134 | 181 | 232 | 159 | 156 | 46  | 13         | 1000  | 10458      | 351    |
| Haryana           | 22                                          | 19  | 81  | 158 | 194 | 185 | 263 | 73  | 4          | 1000  | 5608       | 252    |
| Himachal Pradesh  | 78                                          | 93  | 142 | 163 | 178 | 196 | 119 | 25  | 5          | 1000  | 2400       | 347    |
| Jammu & Kashmir   | 36                                          | 92  | 81  | 239 | 191 | 196 | 135 | 30  | 0          | 1000  | 2246       | 230    |
| Jharkhand         | 81                                          | 66  | 107 | 209 | 155 | 218 | 138 | 16  | 10         | 1000  | 6400       | 330    |
| Karnataka         | 39                                          | 55  | 183 | 209 | 171 | 135 | 176 | 27  | 6          | 1000  | 11642      | 428    |
| Kerala            | 28                                          | 59  | 149 | 155 | 221 | 136 | 197 | 46  | 11         | 1000  | 11673      | 505    |
| Madhya Pradesh    | 76                                          | 72  | 95  | 171 | 175 | 149 | 205 | 49  | 10         | 1000  | 14666      | 549    |
| Maharashtra       | 25                                          | 43  | 129 | 216 | 216 | 202 | 113 | 44  | 13         | 1000  | 23347      | 717    |
| Manipur           | 225                                         | 61  | 61  | 112 | 88  | 205 | 197 | 43  | 8          | 1000  | 395        | 211    |
| Meghalaya         | 84                                          | 81  | 152 | 192 | 105 | 131 | 212 | 35  | 9          | 1000  | 467        | 96     |
| Mizoram           | 115                                         | 192 | 50  | 151 | 101 | 167 | 215 | 2   | 7          | 1000  | 119        | 89     |
| Nagaland          | 132                                         | 48  | 123 | 114 | 136 | 54  | 306 | 86  | 0          | 1000  | 109        | 56     |
| Orissa            | 63                                          | 81  | 142 | 210 | 219 | 121 | 120 | 39  | 5          | 1000  | 13371      | 525    |
| Punjab            | 36                                          | 50  | 112 | 247 | 173 | 167 | 183 | 25  | 7          | 1000  | 6843       | 258    |
| Rajasthan         | 61                                          | 91  | 108 | 133 | 156 | 141 | 239 | 66  | 4          | 1000  | 12196      | 552    |
| Sikkim            | 28                                          | 69  | 64  | 128 | 244 | 225 | 159 | 76  | 7          | 1000  | 115        | 110    |
| Tamil Nadu        | 25                                          | 95  | 195 | 255 | 180 | 139 | 95  | 15  | 1          | 1000  | 16961      | 571    |
| Tripura           | 31                                          | 75  | 111 | 227 | 166 | 233 | 121 | 32  | 4          | 1000  | 927        | 171    |
| Uttaranchal       | 80                                          | 41  | 110 | 161 | 221 | 196 | 109 | 82  | 0          | 1000  | 2674       | 102    |
| Uttar Pradesh     | 81                                          | 75  | 95  | 146 | 175 | 173 | 190 | 48  | 17         | 1000  | 42788      | 1825   |
| West Bengal       | 45                                          | 53  | 116 | 193 | 182 | 169 | 163 | 58  | 21         | 1000  | 18130      | 680    |
| A & N Islands     | 0                                           | 0   | 84  | 267 | 251 | 198 | 108 | 92  | 0          | 1000  | 76         | 34     |

Continued

Table (10): Per 1000 distribution of aged persons by number of living children for each sex and State/UT

| Rural<br>state/ut                 | aged persons with number of living children |       |       |       |       |       |       |       |               |        | Males<br>no. of aged persons |        |
|-----------------------------------|---------------------------------------------|-------|-------|-------|-------|-------|-------|-------|---------------|--------|------------------------------|--------|
|                                   | 0                                           | 1     | 2     | 3     | 4     | 5     | 6-7   | 8-9   | 10 &<br>above | total  | estd. (00)                   | sample |
| (1)                               | (2)                                         | (3)   | (4)   | (5)   | (6)   | (7)   | (8)   | (9)   | (10)          | (11)   | (12)                         | (13)   |
| Chandigarh                        | 74                                          | 0     | 0     | 66    | 404   | 68    | 375   | 12    | 0             | 1000   | 7                            | 17     |
| Dadra & N. Haveli                 | 0                                           | 100   | 43    | 409   | 255   | 135   | 59    | 0     | 0             | 1000   | 78                           | 20     |
| Daman & Diu                       | 73                                          | 0     | 280   | 158   | 0     | 169   | 319   | 0     | 0             | 1000   | 4                            | 7      |
| Lakshadweep                       | 160                                         | 0     | 126   | 184   | 60    | 361   | 110   | 0     | 0             | 1000   | 7                            | 16     |
| Pondicherry                       | 0                                           | 270   | 133   | 208   | 196   | 74    | 68    | 51    | 0             | 1000   | 160                          | 20     |
| ONES                              | 106                                         | 85    | 106   | 174   | 137   | 184   | 166   | 36    | 6             | 1000   | 2371                         | 873    |
| GUTs                              | 6                                           | 153   | 99    | 264   | 222   | 124   | 86    | 46    | 0             | 1000   | 333                          | 114    |
| all-India                         | 53                                          | 66    | 124   | 192   | 193   | 164   | 159   | 40    | 10            | 1000   | 253254                       | 11528  |
| estd. no. of aged<br>persons (00) | 13428                                       | 16779 | 31286 | 48517 | 48759 | 41491 | 40221 | 10162 | 2611          | 253254 | X                            | X      |
| sample aged persons               | 661                                         | 760   | 1320  | 2078  | 2207  | 2002  | 1861  | 499   | 140           | 11528  | X                            | X      |

Table (10): Per 1000 distribution of aged persons by number of living children for each sex and State/UT

| Rural             |                                             |     |     |     |     |     |     |     |            |       | Females             |        |
|-------------------|---------------------------------------------|-----|-----|-----|-----|-----|-----|-----|------------|-------|---------------------|--------|
| state/ut          | aged persons with number of living children |     |     |     |     |     |     |     |            |       | no. of aged persons |        |
|                   | 0                                           | 1   | 2   | 3   | 4   | 5   | 6-7 | 8-9 | 10 & above | total | estd. (00)          | sample |
| (1)               | (2)                                         | (3) | (4) | (5) | (6) | (7) | (8) | (9) | (10)       | (11)  | (12)                | (13)   |
| Andhra Pradesh    | 63                                          | 150 | 164 | 195 | 162 | 125 | 125 | 15  | 3          | 1000  | 20035               | 688    |
| Arunachal Pradesh | 155                                         | 131 | 27  | 181 | 189 | 201 | 86  | 29  | 0          | 1000  | 204                 | 118    |
| Assam             | 59                                          | 56  | 63  | 194 | 278 | 215 | 112 | 21  | 0          | 1000  | 4273                | 323    |
| Bihar             | 52                                          | 80  | 131 | 211 | 156 | 208 | 118 | 37  | 7          | 1000  | 15258               | 678    |
| Chhattisgarh      | 121                                         | 70  | 113 | 146 | 217 | 160 | 154 | 4   | 15         | 1000  | 6680                | 290    |
| Delhi             | 0                                           | 0   | 14  | 240 | 146 | 339 | 261 | 0   | 0          | 1000  | 322                 | 17     |
| Goa               | 106                                         | 44  | 70  | 267 | 371 | 122 | 0   | 21  | 0          | 1000  | 615                 | 32     |
| Gujarat           | 33                                          | 70  | 126 | 164 | 194 | 169 | 183 | 55  | 8          | 1000  | 10401               | 370    |
| Haryana           | 0                                           | 12  | 63  | 117 | 210 | 204 | 290 | 91  | 13         | 1000  | 5510                | 232    |
| Himachal Pradesh  | 88                                          | 178 | 94  | 124 | 128 | 177 | 173 | 32  | 6          | 1000  | 2546                | 346    |
| Jammu & Kashmir   | 14                                          | 120 | 110 | 185 | 123 | 197 | 171 | 75  | 6          | 1000  | 1555                | 173    |
| Jharkhand         | 60                                          | 76  | 91  | 197 | 191 | 235 | 107 | 41  | 1          | 1000  | 4441                | 231    |
| Karnataka         | 52                                          | 107 | 190 | 178 | 166 | 147 | 121 | 34  | 5          | 1000  | 10878               | 403    |
| Kerala            | 48                                          | 74  | 128 | 157 | 196 | 133 | 199 | 48  | 17         | 1000  | 15013               | 649    |
| Madhya Pradesh    | 69                                          | 111 | 103 | 179 | 160 | 161 | 158 | 48  | 12         | 1000  | 14701               | 544    |
| Maharashtra       | 73                                          | 85  | 133 | 157 | 204 | 174 | 128 | 37  | 9          | 1000  | 24333               | 716    |
| Manipur           | 170                                         | 54  | 113 | 102 | 96  | 198 | 193 | 67  | 7          | 1000  | 279                 | 163    |
| Meghalaya         | 74                                          | 79  | 128 | 110 | 74  | 198 | 271 | 60  | 6          | 1000  | 431                 | 95     |
| Mizoram           | 197                                         | 114 | 113 | 134 | 110 | 131 | 192 | 10  | 0          | 1000  | 76                  | 48     |
| Nagaland          | 164                                         | 0   | 81  | 29  | 0   | 20  | 561 | 146 | 0          | 1000  | 39                  | 24     |
| Orissa            | 63                                          | 153 | 145 | 164 | 206 | 108 | 125 | 28  | 10         | 1000  | 12157               | 483    |
| Punjab            | 4                                           | 48  | 130 | 205 | 167 | 217 | 195 | 33  | 0          | 1000  | 6518                | 239    |
| Rajasthan         | 36                                          | 73  | 85  | 156 | 165 | 157 | 230 | 83  | 16         | 1000  | 12999               | 583    |
| Sikkim            | 124                                         | 70  | 59  | 161 | 200 | 108 | 181 | 69  | 29         | 1000  | 109                 | 94     |
| Tamil Nadu        | 59                                          | 153 | 185 | 191 | 156 | 120 | 114 | 18  | 3          | 1000  | 17146               | 549    |
| Tripura           | 31                                          | 115 | 93  | 184 | 201 | 230 | 128 | 19  | 0          | 1000  | 675                 | 135    |
| Uttaranchal       | 50                                          | 121 | 185 | 234 | 205 | 100 | 67  | 38  | 0          | 1000  | 2190                | 90     |
| Uttar Pradesh     | 53                                          | 89  | 112 | 167 | 176 | 193 | 162 | 34  | 13         | 1000  | 41298               | 1649   |
| West Bengal       | 63                                          | 63  | 129 | 197 | 144 | 137 | 178 | 63  | 28         | 1000  | 18472               | 686    |
| A & N Islands     | 156                                         | 110 | 10  | 106 | 63  | 313 | 241 | 0   | 0          | 1000  | 43                  | 15     |

Continued

Table (10): Per 1000 distribution of aged persons by number of living children for each sex and State/UT

| Rural<br>state/ut                 | aged persons with number of living children |       |       |       |       |       |       |      |               |        | Females<br>no. of aged persons |        |
|-----------------------------------|---------------------------------------------|-------|-------|-------|-------|-------|-------|------|---------------|--------|--------------------------------|--------|
|                                   | 0                                           | 1     | 2     | 3     | 4     | 5     | 6-7   | 8-9  | 10 &<br>above | total  | estd. (00)                     | sample |
| (1)                               | (2)                                         | (3)   | (4)   | (5)   | (6)   | (7)   | (8)   | (9)  | (10)          | (11)   | (12)                           | (13)   |
| Chandigarh                        | 0                                           | 195   | 61    | 24    | 280   | 146   | 284   | 11   | 0             | 1000   | 8                              | 11     |
| Dadra & N. Haveli                 | 40                                          | 0     | 82    | 384   | 411   | 28    | 27    | 28   | 0             | 1000   | 39                             | 10     |
| Daman & Diu                       | 0                                           | 97    | 156   | 116   | 0     | 106   | 369   | 156  | 0             | 1000   | 13                             | 13     |
| Lakshadweep                       | 114                                         | 126   | 176   | 183   | 120   | 68    | 212   | 0    | 0             | 1000   | 9                              | 22     |
| Pondicherry                       | 55                                          | 129   | 151   | 183   | 110   | 42    | 331   | 0    | 0             | 1000   | 148                            | 18     |
| ONES                              | 92                                          | 94    | 95    | 147   | 145   | 198   | 182   | 43   | 4             | 1000   | 1813                           | 677    |
| GUTs                              | 67                                          | 107   | 116   | 192   | 147   | 92    | 267   | 13   | 0             | 1000   | 261                            | 89     |
| all-India                         | 56                                          | 95    | 129   | 175   | 177   | 163   | 155   | 39   | 10            | 1000   | 249416                         | 10737  |
| estd. no. of aged<br>persons (00) | 14024                                       | 23751 | 32051 | 43710 | 44245 | 40640 | 38607 | 9795 | 2592          | 249416 | X                              | X      |
| sample aged persons               | 649                                         | 931   | 1245  | 1816  | 1937  | 1809  | 1760  | 465  | 125           | 10737  | X                              | X      |

Table (10): Per 1000 distribution of aged persons by number of living children for each sex and State/UT

| Rural<br>state/ut | aged persons with number of living children |     |     |     |     |     |     |     |            |       | Persons    |        |
|-------------------|---------------------------------------------|-----|-----|-----|-----|-----|-----|-----|------------|-------|------------|--------|
|                   | 0                                           | 1   | 2   | 3   | 4   | 5   | 6-7 | 8-9 | 10 & above | total | estd. (00) | sample |
|                   | (2)                                         | (3) | (4) | (5) | (6) | (7) | (8) | (9) | (10)       | (11)  | (12)       | (13)   |
| Andhra Pradesh    | 61                                          | 123 | 154 | 210 | 178 | 129 | 121 | 17  | 7          | 1000  | 38765      | 1385   |
| Arunachal Pradesh | 214                                         | 136 | 75  | 134 | 158 | 155 | 103 | 23  | 1          | 1000  | 442        | 258    |
| Assam             | 47                                          | 37  | 68  | 209 | 275 | 218 | 117 | 25  | 3          | 1000  | 10376      | 794    |
| Bihar             | 50                                          | 66  | 128 | 201 | 180 | 199 | 131 | 37  | 8          | 1000  | 34119      | 1590   |
| Chhattisgarh      | 105                                         | 72  | 93  | 187 | 222 | 140 | 163 | 6   | 12         | 1000  | 11289      | 494    |
| Delhi             | 0                                           | 60  | 7   | 223 | 117 | 358 | 235 | 0   | 0          | 1000  | 661        | 33     |
| Goa               | 79                                          | 24  | 102 | 281 | 387 | 75  | 28  | 24  | 0          | 1000  | 1121       | 51     |
| Gujarat           | 33                                          | 58  | 130 | 172 | 213 | 164 | 169 | 50  | 10         | 1000  | 20859      | 721    |
| Haryana           | 11                                          | 16  | 72  | 138 | 202 | 194 | 277 | 82  | 8          | 1000  | 11118      | 484    |
| Himachal Pradesh  | 83                                          | 137 | 118 | 143 | 152 | 186 | 147 | 29  | 5          | 1000  | 4946       | 693    |
| Jammu & Kashmir   | 27                                          | 104 | 93  | 217 | 163 | 197 | 150 | 49  | 2          | 1000  | 3801       | 403    |
| Jharkhand         | 73                                          | 70  | 100 | 204 | 170 | 225 | 125 | 27  | 6          | 1000  | 10841      | 561    |
| Karnataka         | 45                                          | 80  | 186 | 194 | 168 | 141 | 149 | 31  | 5          | 1000  | 22520      | 831    |
| Kerala            | 39                                          | 68  | 137 | 156 | 207 | 134 | 198 | 47  | 14         | 1000  | 26687      | 1154   |
| Madhya Pradesh    | 72                                          | 91  | 99  | 175 | 167 | 155 | 181 | 48  | 11         | 1000  | 29367      | 1093   |
| Maharashtra       | 50                                          | 64  | 131 | 186 | 210 | 188 | 120 | 40  | 11         | 1000  | 47679      | 1433   |
| Manipur           | 202                                         | 58  | 82  | 108 | 92  | 202 | 195 | 53  | 7          | 1000  | 673        | 374    |
| Meghalaya         | 79                                          | 80  | 140 | 153 | 90  | 163 | 240 | 47  | 8          | 1000  | 898        | 191    |
| Mizoram           | 147                                         | 161 | 75  | 144 | 105 | 153 | 206 | 5   | 4          | 1000  | 196        | 137    |
| Nagaland          | 141                                         | 36  | 112 | 92  | 100 | 45  | 373 | 102 | 0          | 1000  | 148        | 80     |
| Orissa            | 63                                          | 115 | 143 | 188 | 213 | 115 | 122 | 33  | 7          | 1000  | 25527      | 1008   |
| Punjab            | 21                                          | 49  | 121 | 227 | 170 | 191 | 189 | 29  | 4          | 1000  | 13361      | 497    |
| Rajasthan         | 48                                          | 82  | 96  | 145 | 161 | 149 | 235 | 74  | 10         | 1000  | 25196      | 1135   |
| Sikkim            | 74                                          | 69  | 61  | 144 | 223 | 168 | 170 | 73  | 18         | 1000  | 224        | 204    |
| Tamil Nadu        | 43                                          | 124 | 190 | 222 | 168 | 130 | 105 | 17  | 2          | 1000  | 34107      | 1120   |
| Tripura           | 31                                          | 92  | 103 | 209 | 181 | 231 | 124 | 26  | 2          | 1000  | 1602       | 306    |
| Uttaranchal       | 67                                          | 77  | 144 | 194 | 214 | 153 | 90  | 62  | 0          | 1000  | 4865       | 192    |
| Uttar Pradesh     | 67                                          | 82  | 104 | 157 | 176 | 183 | 177 | 41  | 15         | 1000  | 84086      | 3474   |
| West Bengal       | 54                                          | 58  | 123 | 195 | 163 | 153 | 170 | 60  | 24         | 1000  | 36602      | 1366   |
| A & N Islands     | 56                                          | 40  | 57  | 209 | 183 | 240 | 156 | 59  | 0          | 1000  | 120        | 49     |

Continued

Table (10): Per 1000 distribution of aged persons by number of living children for each sex and State/UT

| Rural<br>state/ut                 | aged persons with number of living children |       |       |       |       |       |       |       |               |        | Persons    |        |
|-----------------------------------|---------------------------------------------|-------|-------|-------|-------|-------|-------|-------|---------------|--------|------------|--------|
|                                   | 0                                           | 1     | 2     | 3     | 4     | 5     | 6-7   | 8-9   | 10 &<br>above | total  | estd. (00) | sample |
| (1)                               | (2)                                         | (3)   | (4)   | (5)   | (6)   | (7)   | (8)   | (9)   | (10)          | (11)   | (12)       | (13)   |
| Chandigarh                        | 35                                          | 104   | 32    | 44    | 338   | 109   | 326   | 12    | 0             | 1000   | 16         | 28     |
| Dadra & N. Haveli                 | 13                                          | 67    | 56    | 400   | 307   | 100   | 48    | 9     | 0             | 1000   | 117        | 30     |
| Daman & Diu                       | 17                                          | 74    | 185   | 126   | 0     | 121   | 357   | 120   | 0             | 1000   | 17         | 20     |
| Lakshadweep                       | 134                                         | 70    | 154   | 184   | 93    | 198   | 167   | 0     | 0             | 1000   | 16         | 38     |
| Pondicherry                       | 26                                          | 202   | 142   | 196   | 155   | 58    | 194   | 27    | 0             | 1000   | 309        | 38     |
| ONES                              | 100                                         | 89    | 102   | 162   | 140   | 190   | 173   | 39    | 5             | 1000   | 4184       | 1550   |
| GUTs                              | 33                                          | 133   | 107   | 232   | 189   | 110   | 165   | 31    | 0             | 1000   | 594        | 203    |
| all-India                         | 55                                          | 81    | 126   | 183   | 185   | 163   | 157   | 40    | 10            | 1000   | 502670     | 22265  |
| estd. no. of aged<br>persons (00) | 27451                                       | 40531 | 63336 | 92227 | 93003 | 82132 | 78828 | 19957 | 5204          | 502670 | X          | X      |
| sample aged persons               | 1310                                        | 1691  | 2565  | 3894  | 4144  | 3811  | 3621  | 964   | 265           | 22265  | X          | X      |



Table (10): Per 1000 distribution of aged persons by number of living children for each sex and State/UT

| Urban<br>state/ut | aged persons with number of living children |     |     |     |     |     |     |     |               |       | Males<br>no. of aged persons |        |
|-------------------|---------------------------------------------|-----|-----|-----|-----|-----|-----|-----|---------------|-------|------------------------------|--------|
|                   | 0                                           | 1   | 2   | 3   | 4   | 5   | 6-7 | 8-9 | 10 &<br>above | total | estd. (00)                   | sample |
| (1)               | (2)                                         | (3) | (4) | (5) | (6) | (7) | (8) | (9) | (10)          | (11)  | (12)                         | (13)   |
| Andhra Pradesh    | 27                                          | 80  | 186 | 206 | 235 | 89  | 126 | 39  | 13            | 1000  | 5310                         | 377    |
| Arunachal Pradesh | 178                                         | 80  | 83  | 229 | 99  | 259 | 73  | 0   | 0             | 1000  | 10                           | 42     |
| Assam             | 30                                          | 27  | 177 | 283 | 146 | 154 | 182 | 0   | 0             | 1000  | 647                          | 109    |
| Bihar             | 75                                          | 26  | 70  | 188 | 176 | 239 | 168 | 27  | 29            | 1000  | 2455                         | 169    |
| Chhattisgarh      | 9                                           | 2   | 186 | 175 | 275 | 255 | 73  | 26  | 0             | 1000  | 641                          | 63     |
| Delhi             | 34                                          | 137 | 227 | 177 | 158 | 119 | 147 | 1   | 0             | 1000  | 2212                         | 211    |
| Goa               | 144                                         | 100 | 77  | 219 | 289 | 167 | 5   | 0   | 0             | 1000  | 229                          | 32     |
| Gujarat           | 30                                          | 58  | 178 | 260 | 162 | 154 | 94  | 61  | 2             | 1000  | 4592                         | 297    |
| Haryana           | 23                                          | 25  | 21  | 200 | 271 | 224 | 198 | 35  | 4             | 1000  | 1315                         | 132    |
| Himachal Pradesh  | 52                                          | 60  | 191 | 139 | 200 | 193 | 110 | 43  | 12            | 1000  | 139                          | 49     |
| Jammu & Kashmir   | 56                                          | 41  | 197 | 90  | 179 | 286 | 107 | 43  | 0             | 1000  | 408                          | 102    |
| Jharkhand         | 11                                          | 117 | 69  | 149 | 229 | 225 | 162 | 7   | 31            | 1000  | 1372                         | 166    |
| Karnataka         | 25                                          | 77  | 181 | 280 | 214 | 93  | 71  | 56  | 2             | 1000  | 4025                         | 345    |
| Kerala            | 41                                          | 72  | 227 | 262 | 152 | 102 | 121 | 18  | 6             | 1000  | 3986                         | 290    |
| Madhya Pradesh    | 63                                          | 76  | 129 | 201 | 207 | 102 | 182 | 28  | 11            | 1000  | 4115                         | 319    |
| Maharashtra       | 45                                          | 65  | 169 | 225 | 276 | 94  | 103 | 17  | 6             | 1000  | 12844                        | 596    |
| Manipur           | 105                                         | 59  | 76  | 167 | 218 | 168 | 129 | 77  | 0             | 1000  | 192                          | 116    |
| Meghalaya         | 27                                          | 12  | 156 | 382 | 115 | 137 | 144 | 17  | 10            | 1000  | 42                           | 34     |
| Mizoram           | 199                                         | 111 | 96  | 148 | 82  | 220 | 126 | 10  | 7             | 1000  | 85                           | 142    |
| Nagaland          | 0                                           | 35  | 128 | 197 | 153 | 172 | 174 | 143 | 0             | 1000  | 68                           | 24     |
| Orissa            | 15                                          | 134 | 120 | 197 | 196 | 72  | 193 | 64  | 7             | 1000  | 1546                         | 148    |
| Punjab            | 52                                          | 41  | 119 | 176 | 208 | 180 | 177 | 14  | 33            | 1000  | 2565                         | 165    |
| Rajasthan         | 24                                          | 66  | 86  | 190 | 207 | 139 | 234 | 49  | 5             | 1000  | 3012                         | 271    |
| Sikkim            | 168                                         | 136 | 220 | 78  | 81  | 233 | 84  | 0   | 0             | 1000  | 11                           | 16     |
| Tamil Nadu        | 62                                          | 90  | 233 | 249 | 158 | 86  | 100 | 18  | 3             | 1000  | 7955                         | 587    |
| Tripura           | 0                                           | 68  | 158 | 207 | 253 | 225 | 68  | 21  | 0             | 1000  | 130                          | 45     |
| Uttaranchal       | 20                                          | 129 | 204 | 146 | 186 | 178 | 135 | 2   | 0             | 1000  | 558                          | 49     |
| Uttar Pradesh     | 57                                          | 73  | 94  | 152 | 162 | 195 | 195 | 36  | 39            | 1000  | 9104                         | 620    |
| West Bengal       | 89                                          | 110 | 270 | 169 | 107 | 109 | 117 | 23  | 6             | 1000  | 8725                         | 522    |
| A & N Islands     | 71                                          | 0   | 171 | 259 | 183 | 110 | 207 | 0   | 0             | 1000  | 18                           | 18     |

Continued

Table (10): Per 1000 distribution of aged persons by number of living children for each sex and State/UT

| Urban<br>state/ut                 | aged persons with number of living children |      |       |       |       |       |       |      |               |       | Males<br>no. of aged persons |        |
|-----------------------------------|---------------------------------------------|------|-------|-------|-------|-------|-------|------|---------------|-------|------------------------------|--------|
|                                   | 0                                           | 1    | 2     | 3     | 4     | 5     | 6-7   | 8-9  | 10 &<br>above | total | estd. (00)                   | sample |
| (1)                               | (2)                                         | (3)  | (4)   | (5)   | (6)   | (7)   | (8)   | (9)  | (10)          | (11)  | (12)                         | (13)   |
| Chandigarh                        | 0                                           | 39   | 262   | 352   | 214   | 87    | 47    | 0    | 0             | 1000  | 197                          | 69     |
| Dadra & N. Haveli                 | 0                                           | 0    | 84    | 330   | 227   | 360   | 0     | 0    | 0             | 1000  | 4                            | 13     |
| Daman & Diu                       | 74                                          | 0    | 227   | 36    | 378   | 111   | 74    | 0    | 100           | 1000  | 10                           | 16     |
| Lakshadweep                       | 0                                           | 203  | 25    | 293   | 101   | 149   | 25    | 35   | 169           | 1000  | 8                            | 21     |
| Pondicherry                       | 57                                          | 41   | 63    | 184   | 197   | 179   | 224   | 55   | 0             | 1000  | 218                          | 47     |
| ONES                              | 78                                          | 64   | 115   | 194   | 184   | 191   | 119   | 54   | 2             | 1000  | 538                          | 419    |
| GUTs                              | 32                                          | 40   | 156   | 260   | 206   | 136   | 138   | 27   | 5             | 1000  | 455                          | 184    |
| all-India                         | 49                                          | 77   | 170   | 208   | 193   | 129   | 135   | 29   | 11            | 1000  | 78751                        | 6222   |
| estd. no. of aged<br>persons (00) | 3856                                        | 6036 | 13360 | 16376 | 15166 | 10148 | 10642 | 2273 | 894           | 78751 | X                            | X      |
| sample aged persons               | 327                                         | 463  | 975   | 1323  | 1156  | 863   | 838   | 204  | 73            | 6222  | X                            | X      |

Table (10): Per 1000 distribution of aged persons by number of living children for each sex and State/UT

| Urban<br>state/ut | aged persons with number of living children |     |     |     |     |     |     |     |               |       | Females<br>no. of aged persons |        |
|-------------------|---------------------------------------------|-----|-----|-----|-----|-----|-----|-----|---------------|-------|--------------------------------|--------|
|                   | 0                                           | 1   | 2   | 3   | 4   | 5   | 6-7 | 8-9 | 10 &<br>above | total | estd. (00)                     | sample |
| (1)               | (2)                                         | (3) | (4) | (5) | (6) | (7) | (8) | (9) | (10)          | (11)  | (12)                           | (13)   |
| Andhra Pradesh    | 50                                          | 136 | 171 | 145 | 199 | 124 | 149 | 23  | 3             | 1000  | 6160                           | 421    |
| Arunachal Pradesh | 79                                          | 109 | 113 | 233 | 263 | 123 | 79  | 0   | 0             | 1000  | 7                              | 30     |
| Assam             | 77                                          | 33  | 28  | 150 | 198 | 366 | 125 | 4   | 21            | 1000  | 532                            | 85     |
| Bihar             | 65                                          | 42  | 65  | 168 | 209 | 235 | 127 | 41  | 49            | 1000  | 1829                           | 145    |
| Chhattisgarh      | 80                                          | 101 | 174 | 123 | 98  | 243 | 85  | 79  | 18            | 1000  | 760                            | 88     |
| Delhi             | 51                                          | 77  | 212 | 199 | 233 | 126 | 86  | 6   | 10            | 1000  | 2129                           | 207    |
| Goa               | 106                                         | 256 | 29  | 122 | 273 | 151 | 38  | 25  | 0             | 1000  | 256                            | 40     |
| Gujarat           | 43                                          | 96  | 108 | 171 | 214 | 167 | 136 | 65  | 0             | 1000  | 5101                           | 319    |
| Haryana           | 57                                          | 33  | 57  | 141 | 189 | 276 | 200 | 47  | 0             | 1000  | 1725                           | 143    |
| Himachal Pradesh  | 23                                          | 72  | 80  | 218 | 195 | 148 | 265 | 0   | 0             | 1000  | 155                            | 50     |
| Jammu & Kashmir   | 46                                          | 29  | 72  | 236 | 169 | 209 | 175 | 63  | 0             | 1000  | 336                            | 91     |
| Jharkhand         | 34                                          | 105 | 114 | 120 | 196 | 238 | 102 | 62  | 29            | 1000  | 1292                           | 139    |
| Karnataka         | 49                                          | 122 | 147 | 214 | 164 | 131 | 151 | 17  | 4             | 1000  | 4073                           | 353    |
| Kerala            | 109                                         | 79  | 121 | 195 | 141 | 133 | 207 | 13  | 4             | 1000  | 4686                           | 322    |
| Madhya Pradesh    | 99                                          | 108 | 125 | 141 | 181 | 124 | 173 | 47  | 1             | 1000  | 4466                           | 327    |
| Maharashtra       | 64                                          | 84  | 101 | 177 | 249 | 122 | 166 | 33  | 4             | 1000  | 13669                          | 672    |
| Manipur           | 171                                         | 69  | 84  | 136 | 92  | 181 | 161 | 105 | 0             | 1000  | 178                            | 115    |
| Meghalaya         | 23                                          | 94  | 6   | 242 | 252 | 154 | 219 | 0   | 10            | 1000  | 48                             | 46     |
| Mizoram           | 155                                         | 253 | 92  | 112 | 77  | 185 | 98  | 13  | 14            | 1000  | 60                             | 104    |
| Nagaland          | 0                                           | 0   | 368 | 112 | 0   | 368 | 42  | 112 | 0             | 1000  | 8                              | 5      |
| Orissa            | 57                                          | 114 | 182 | 258 | 70  | 91  | 191 | 33  | 4             | 1000  | 1182                           | 113    |
| Punjab            | 25                                          | 66  | 72  | 177 | 202 | 192 | 137 | 98  | 31            | 1000  | 2347                           | 164    |
| Rajasthan         | 32                                          | 98  | 93  | 153 | 201 | 165 | 211 | 40  | 8             | 1000  | 3076                           | 266    |
| Sikkim            | 0                                           | 204 | 204 | 78  | 19  | 175 | 301 | 19  | 0             | 1000  | 7                              | 13     |
| Tamil Nadu        | 79                                          | 116 | 209 | 177 | 161 | 91  | 131 | 30  | 4             | 1000  | 8984                           | 650    |
| Tripura           | 8                                           | 202 | 164 | 90  | 157 | 131 | 217 | 31  | 0             | 1000  | 136                            | 54     |
| Uttaranchal       | 32                                          | 55  | 42  | 239 | 289 | 136 | 206 | 0   | 0             | 1000  | 693                            | 49     |
| Uttar Pradesh     | 69                                          | 70  | 140 | 158 | 139 | 191 | 170 | 37  | 27            | 1000  | 9590                           | 621    |
| West Bengal       | 83                                          | 103 | 225 | 135 | 152 | 124 | 154 | 21  | 3             | 1000  | 8315                           | 506    |
| A & N Islands     | 49                                          | 62  | 72  | 255 | 143 | 74  | 296 | 0   | 49            | 1000  | 15                             | 22     |

Continued

Table (10): Per 1000 distribution of aged persons by number of living children for each sex and State/UT

| Urban<br>state/ut                 | aged persons with number of living children |      |       |       |       |       |       |      |               |       | Females<br>no. of aged persons |        |
|-----------------------------------|---------------------------------------------|------|-------|-------|-------|-------|-------|------|---------------|-------|--------------------------------|--------|
|                                   | 0                                           | 1    | 2     | 3     | 4     | 5     | 6-7   | 8-9  | 10 &<br>above | total | estd. (00)                     | sample |
| (1)                               | (2)                                         | (3)  | (4)   | (5)   | (6)   | (7)   | (8)   | (9)  | (10)          | (11)  | (12)                           | (13)   |
| Chandigarh                        | 53                                          | 22   | 214   | 240   | 251   | 114   | 69    | 37   | 0             | 1000  | 147                            | 68     |
| Dadra & N. Haveli                 | 65                                          | 0    | 158   | 237   | 213   | 168   | 158   | 0    | 0             | 1000  | 3                              | 14     |
| Daman & Diu                       | 42                                          | 100  | 190   | 233   | 86    | 33    | 316   | 0    | 0             | 1000  | 16                             | 22     |
| Lakshadweep                       | 147                                         | 64   | 52    | 222   | 69    | 245   | 188   | 12   | 0             | 1000  | 10                             | 24     |
| Pondicherry                       | 77                                          | 22   | 133   | 210   | 254   | 152   | 119   | 32   | 0             | 1000  | 368                            | 56     |
| ONES                              | 96                                          | 139  | 109   | 130   | 127   | 166   | 175   | 56   | 3             | 1000  | 444                            | 367    |
| GUTs                              | 70                                          | 26   | 153   | 220   | 242   | 138   | 118   | 31   | 1             | 1000  | 560                            | 206    |
| all-India                         | 66                                          | 94   | 141   | 168   | 185   | 145   | 157   | 34   | 9             | 1000  | 82359                          | 6344   |
| estd. no. of aged<br>persons (00) | 5459                                        | 7712 | 11646 | 13820 | 15255 | 11978 | 12936 | 2836 | 718           | 82359 | X                              | X      |
| sample aged persons               | 429                                         | 593  | 853   | 1124  | 1114  | 942   | 975   | 253  | 61            | 6344  | X                              | X      |

Table (10): Per 1000 distribution of aged persons by number of living children for each sex and State/UT

| Urban<br>state/ut | aged persons with number of living children |     |     |     |     |     |     |     |               |       | Persons    |        |
|-------------------|---------------------------------------------|-----|-----|-----|-----|-----|-----|-----|---------------|-------|------------|--------|
|                   | 0                                           | 1   | 2   | 3   | 4   | 5   | 6-7 | 8-9 | 10 &<br>above | total | estd. (00) | sample |
|                   | (2)                                         | (3) | (4) | (5) | (6) | (7) | (8) | (9) | (10)          | (11)  | (12)       | (13)   |
| Andhra Pradesh    | 39                                          | 110 | 178 | 174 | 215 | 108 | 138 | 30  | 8             | 1000  | 11470      | 798    |
| Arunachal Pradesh | 137                                         | 92  | 95  | 231 | 166 | 203 | 76  | 0   | 0             | 1000  | 17         | 72     |
| Assam             | 51                                          | 30  | 110 | 223 | 170 | 250 | 156 | 2   | 9             | 1000  | 1180       | 194    |
| Bihar             | 71                                          | 33  | 68  | 179 | 190 | 237 | 151 | 33  | 38            | 1000  | 4283       | 314    |
| Chhattisgarh      | 47                                          | 55  | 179 | 147 | 179 | 249 | 79  | 54  | 10            | 1000  | 1401       | 151    |
| Delhi             | 43                                          | 108 | 220 | 188 | 195 | 122 | 117 | 4   | 5             | 1000  | 4342       | 418    |
| Goa               | 124                                         | 182 | 52  | 168 | 280 | 159 | 22  | 13  | 0             | 1000  | 485        | 72     |
| Gujarat           | 37                                          | 78  | 141 | 213 | 189 | 161 | 116 | 63  | 1             | 1000  | 9693       | 616    |
| Haryana           | 42                                          | 30  | 42  | 167 | 224 | 253 | 199 | 42  | 2             | 1000  | 3040       | 275    |
| Himachal Pradesh  | 37                                          | 66  | 133 | 181 | 197 | 169 | 192 | 20  | 6             | 1000  | 294        | 99     |
| Jammu & Kashmir   | 51                                          | 36  | 141 | 156 | 175 | 252 | 138 | 52  | 0             | 1000  | 744        | 193    |
| Jharkhand         | 22                                          | 111 | 91  | 135 | 213 | 231 | 133 | 33  | 30            | 1000  | 2664       | 305    |
| Karnataka         | 37                                          | 100 | 164 | 247 | 189 | 112 | 112 | 36  | 3             | 1000  | 8098       | 698    |
| Kerala            | 78                                          | 76  | 169 | 226 | 146 | 119 | 167 | 15  | 5             | 1000  | 8672       | 612    |
| Madhya Pradesh    | 82                                          | 93  | 127 | 170 | 194 | 113 | 177 | 38  | 6             | 1000  | 8580       | 646    |
| Maharashtra       | 55                                          | 75  | 134 | 200 | 262 | 108 | 136 | 25  | 5             | 1000  | 26513      | 1268   |
| Manipur           | 137                                         | 64  | 80  | 152 | 158 | 174 | 144 | 91  | 0             | 1000  | 369        | 231    |
| Meghalaya         | 25                                          | 55  | 77  | 308 | 188 | 146 | 183 | 8   | 10            | 1000  | 90         | 80     |
| Mizoram           | 181                                         | 170 | 94  | 133 | 80  | 206 | 114 | 12  | 10            | 1000  | 145        | 246    |
| Nagaland          | 0                                           | 31  | 152 | 188 | 137 | 192 | 160 | 140 | 0             | 1000  | 76         | 29     |
| Orissa            | 33                                          | 125 | 147 | 223 | 142 | 80  | 192 | 51  | 6             | 1000  | 2729       | 261    |
| Punjab            | 39                                          | 53  | 96  | 177 | 205 | 186 | 158 | 54  | 32            | 1000  | 4912       | 329    |
| Rajasthan         | 28                                          | 82  | 89  | 172 | 204 | 152 | 222 | 45  | 6             | 1000  | 6088       | 537    |
| Sikkim            | 101                                         | 163 | 214 | 78  | 56  | 210 | 171 | 8   | 0             | 1000  | 18         | 29     |
| Tamil Nadu        | 71                                          | 104 | 221 | 211 | 160 | 89  | 117 | 24  | 4             | 1000  | 16939      | 1237   |
| Tripura           | 4                                           | 137 | 161 | 147 | 204 | 177 | 144 | 26  | 0             | 1000  | 267        | 99     |
| Uttaranchal       | 27                                          | 88  | 115 | 198 | 243 | 155 | 174 | 1   | 0             | 1000  | 1252       | 98     |
| Uttar Pradesh     | 63                                          | 71  | 117 | 155 | 150 | 193 | 182 | 36  | 32            | 1000  | 18694      | 1241   |
| West Bengal       | 86                                          | 107 | 248 | 152 | 129 | 116 | 135 | 22  | 5             | 1000  | 17040      | 1028   |
| A & N Islands     | 61                                          | 28  | 126 | 257 | 164 | 94  | 248 | 0   | 23            | 1000  | 33         | 40     |

Continued

Table (10): Per 1000 distribution of aged persons by number of living children for each sex and State/UT

| Urban<br>state/ut                 | aged persons with number of living children |       |       |       |       |       |       |      |               |        | Persons    |        |
|-----------------------------------|---------------------------------------------|-------|-------|-------|-------|-------|-------|------|---------------|--------|------------|--------|
|                                   | 0                                           | 1     | 2     | 3     | 4     | 5     | 6-7   | 8-9  | 10 &<br>above | total  | estd. (00) | sample |
| (1)                               | (2)                                         | (3)   | (4)   | (5)   | (6)   | (7)   | (8)   | (9)  | (10)          | (11)   | (12)       | (13)   |
| Chandigarh                        | 23                                          | 32    | 241   | 304   | 230   | 98    | 56    | 16   | 0             | 1000   | 344        | 137    |
| Dadra & N. Haveli                 | 31                                          | 0     | 119   | 286   | 221   | 269   | 75    | 0    | 0             | 1000   | 7          | 27     |
| Daman & Diu                       | 54                                          | 62    | 204   | 157   | 198   | 63    | 223   | 0    | 39            | 1000   | 26         | 38     |
| Lakshadweep                       | 82                                          | 126   | 40    | 253   | 83    | 203   | 116   | 22   | 74            | 1000   | 19         | 45     |
| Pondicherry                       | 70                                          | 29    | 107   | 201   | 233   | 162   | 158   | 41   | 0             | 1000   | 586        | 103    |
| ONES                              | 86                                          | 98    | 112   | 165   | 158   | 180   | 144   | 55   | 2             | 1000   | 983        | 786    |
| GUTs                              | 53                                          | 33    | 155   | 238   | 226   | 137   | 127   | 29   | 3             | 1000   | 1015       | 390    |
| all-India                         | 58                                          | 85    | 155   | 187   | 189   | 137   | 146   | 32   | 10            | 1000   | 161110     | 12566  |
| estd. no. of aged<br>persons (00) | 9315                                        | 13748 | 25005 | 30196 | 30422 | 22126 | 23578 | 5109 | 1612          | 161110 | X          | X      |
| sample aged persons               | 756                                         | 1056  | 1828  | 2447  | 2270  | 1805  | 1813  | 457  | 134           | 12566  | X          | X      |

Table (10): Per 1000 distribution of aged persons by number of living children for each sex and State/UT

| Rural +Urban<br>state/ut | aged persons with number of living children |     |     |     |     |     |     |     |            |       | Males      |        |
|--------------------------|---------------------------------------------|-----|-----|-----|-----|-----|-----|-----|------------|-------|------------|--------|
|                          | 0                                           | 1   | 2   | 3   | 4   | 5   | 6-7 | 8-9 | 10 & above | total | estd. (00) | sample |
| (1)                      | (2)                                         | (3) | (4) | (5) | (6) | (7) | (8) | (9) | (10)       | (11)  | (12)       | (13)   |
| Andhra Pradesh           | 52                                          | 90  | 154 | 222 | 205 | 124 | 119 | 23  | 12         | 1000  | 24041      | 1074   |
| Arunachal Pradesh        | 261                                         | 138 | 116 | 100 | 130 | 122 | 116 | 17  | 2          | 1000  | 248        | 182    |
| Assam                    | 38                                          | 24  | 82  | 225 | 260 | 213 | 127 | 25  | 5          | 1000  | 6750       | 580    |
| Bihar                    | 52                                          | 51  | 120 | 192 | 197 | 196 | 144 | 37  | 11         | 1000  | 21316      | 1081   |
| Chhattisgarh             | 74                                          | 66  | 80  | 238 | 234 | 129 | 162 | 11  | 7          | 1000  | 5250       | 267    |
| Delhi                    | 30                                          | 134 | 197 | 181 | 149 | 153 | 155 | 1   | 0          | 1000  | 2551       | 227    |
| Goa                      | 76                                          | 31  | 122 | 273 | 370 | 64  | 45  | 19  | 0          | 1000  | 735        | 51     |
| Gujarat                  | 32                                          | 51  | 147 | 205 | 210 | 157 | 137 | 51  | 10         | 1000  | 15050      | 648    |
| Haryana                  | 22                                          | 20  | 70  | 166 | 209 | 193 | 251 | 66  | 4          | 1000  | 6923       | 384    |
| Himachal Pradesh         | 77                                          | 91  | 145 | 162 | 179 | 196 | 119 | 26  | 6          | 1000  | 2539       | 396    |
| Jammu & Kashmir          | 39                                          | 84  | 99  | 216 | 189 | 210 | 131 | 32  | 0          | 1000  | 2654       | 332    |
| Jharkhand                | 69                                          | 75  | 100 | 198 | 168 | 220 | 142 | 15  | 14         | 1000  | 7772       | 496    |
| Karnataka                | 36                                          | 61  | 182 | 227 | 182 | 124 | 149 | 34  | 5          | 1000  | 15667      | 773    |
| Kerala                   | 31                                          | 62  | 169 | 182 | 203 | 127 | 177 | 39  | 10         | 1000  | 15659      | 795    |
| Madhya Pradesh           | 73                                          | 73  | 103 | 177 | 182 | 139 | 200 | 44  | 10         | 1000  | 18781      | 868    |
| Maharashtra              | 32                                          | 51  | 143 | 219 | 237 | 164 | 109 | 34  | 11         | 1000  | 36191      | 1313   |
| Manipur                  | 186                                         | 61  | 66  | 130 | 131 | 193 | 175 | 54  | 5          | 1000  | 587        | 327    |
| Meghalaya                | 79                                          | 75  | 152 | 208 | 106 | 131 | 206 | 33  | 9          | 1000  | 510        | 130    |
| Mizoram                  | 150                                         | 158 | 69  | 150 | 93  | 189 | 178 | 5   | 7          | 1000  | 204        | 231    |
| Nagaland                 | 81                                          | 43  | 125 | 146 | 143 | 100 | 255 | 108 | 0          | 1000  | 178        | 80     |
| Orissa                   | 58                                          | 87  | 140 | 209 | 217 | 116 | 127 | 41  | 6          | 1000  | 14917      | 673    |
| Punjab                   | 40                                          | 48  | 114 | 228 | 182 | 170 | 181 | 22  | 14         | 1000  | 9408       | 423    |
| Rajasthan                | 54                                          | 86  | 104 | 145 | 166 | 141 | 238 | 62  | 5          | 1000  | 15208      | 823    |
| Sikkim                   | 40                                          | 74  | 77  | 124 | 230 | 226 | 153 | 70  | 7          | 1000  | 126        | 126    |
| Tamil Nadu               | 37                                          | 93  | 207 | 253 | 173 | 122 | 97  | 16  | 2          | 1000  | 24916      | 1158   |
| Tripura                  | 28                                          | 74  | 117 | 225 | 176 | 232 | 114 | 31  | 4          | 1000  | 1057       | 216    |
| Uttaranchal              | 70                                          | 56  | 126 | 159 | 215 | 193 | 113 | 68  | 0          | 1000  | 3232       | 151    |
| Uttar Pradesh            | 77                                          | 74  | 95  | 147 | 173 | 177 | 191 | 46  | 20         | 1000  | 51892      | 2445   |
| West Bengal              | 59                                          | 71  | 166 | 185 | 158 | 149 | 148 | 47  | 16         | 1000  | 26855      | 1202   |
| A & N Islands            | 13                                          | 0   | 100 | 265 | 238 | 182 | 127 | 74  | 0          | 1000  | 94         | 52     |

Continued



Table (10): Per 1000 distribution of aged persons by number of living children for each sex and State/UT

| Rural +Urban                   |                                             |       |       |       |       |       |       |       |            |        | Males               |        |
|--------------------------------|---------------------------------------------|-------|-------|-------|-------|-------|-------|-------|------------|--------|---------------------|--------|
| state/ut                       | aged persons with number of living children |       |       |       |       |       |       |       |            |        | no. of aged persons |        |
|                                | 0                                           | 1     | 2     | 3     | 4     | 5     | 6-7   | 8-9   | 10 & above | total  | estd. (00)          | sample |
| (1)                            | (2)                                         | (3)   | (4)   | (5)   | (6)   | (7)   | (8)   | (9)   | (10)       | (11)   | (12)                | (13)   |
| Chandigarh                     | 3                                           | 38    | 253   | 342   | 220   | 86    | 59    | 0     | 0          | 1000   | 205                 | 86     |
| Dadra & N. Haveli              | 0                                           | 95    | 45    | 405   | 254   | 145   | 56    | 0     | 0          | 1000   | 82                  | 33     |
| Daman & Diu                    | 74                                          | 0     | 243   | 72    | 267   | 128   | 146   | 0     | 71         | 1000   | 14                  | 23     |
| Lakshadweep                    | 74                                          | 109   | 72    | 242   | 82    | 247   | 64    | 19    | 90         | 1000   | 15                  | 37     |
| Pondicherry                    | 33                                          | 138   | 92    | 194   | 197   | 135   | 158   | 53    | 0          | 1000   | 379                 | 67     |
| ONES                           | 101                                         | 81    | 108   | 178   | 145   | 186   | 157   | 39    | 5          | 1000   | 2909                | 1292   |
| GUTs                           | 21                                          | 88    | 132   | 262   | 213   | 131   | 116   | 35    | 3          | 1000   | 789                 | 298    |
| all-India                      | 52                                          | 69    | 134   | 195   | 193   | 156   | 153   | 37    | 11         | 1000   | 332005              | 17750  |
| estd. no. of aged persons (00) | 17284                                       | 22815 | 44645 | 64893 | 63925 | 51639 | 50863 | 12435 | 3506       | 332005 | X                   | X      |
| sample aged persons            | 988                                         | 1223  | 2295  | 3401  | 3363  | 2865  | 2699  | 703   | 213        | 17750  | X                   | X      |

Table (10): Per 1000 distribution of aged persons by number of living children for each sex and State/UT

| Rural +Urban<br>state/ut | aged persons with number of living children |     |     |     |     |     |     |     |               |       | Females    |        |
|--------------------------|---------------------------------------------|-----|-----|-----|-----|-----|-----|-----|---------------|-------|------------|--------|
|                          | 0                                           | 1   | 2   | 3   | 4   | 5   | 6-7 | 8-9 | 10 &<br>above | total | estd. (00) | sample |
|                          | (2)                                         | (3) | (4) | (5) | (6) | (7) | (8) | (9) | (10)          | (11)  | (12)       | (13)   |
| Andhra Pradesh           | 60                                          | 147 | 165 | 184 | 170 | 124 | 130 | 17  | 3             | 1000  | 26195      | 1109   |
| Arunachal Pradesh        | 153                                         | 131 | 30  | 182 | 192 | 199 | 86  | 28  | 0             | 1000  | 211        | 148    |
| Assam                    | 61                                          | 54  | 59  | 189 | 269 | 232 | 114 | 19  | 3             | 1000  | 4806       | 408    |
| Bihar                    | 53                                          | 76  | 124 | 206 | 162 | 211 | 119 | 37  | 12            | 1000  | 17087      | 823    |
| Chhattisgarh             | 116                                         | 73  | 119 | 143 | 205 | 169 | 147 | 12  | 16            | 1000  | 7440       | 378    |
| Delhi                    | 44                                          | 67  | 186 | 205 | 221 | 154 | 109 | 5   | 9             | 1000  | 2452       | 224    |
| Goa                      | 106                                         | 107 | 58  | 224 | 342 | 130 | 11  | 22  | 0             | 1000  | 871        | 72     |
| Gujarat                  | 36                                          | 78  | 120 | 166 | 201 | 168 | 167 | 58  | 5             | 1000  | 15501      | 689    |
| Haryana                  | 14                                          | 17  | 61  | 123 | 205 | 221 | 269 | 81  | 10            | 1000  | 7235       | 375    |
| Himachal Pradesh         | 84                                          | 172 | 94  | 129 | 132 | 175 | 178 | 30  | 5             | 1000  | 2701       | 396    |
| Jammu & Kashmir          | 19                                          | 104 | 103 | 194 | 131 | 199 | 172 | 73  | 5             | 1000  | 1891       | 264    |
| Jharkhand                | 54                                          | 83  | 96  | 180 | 192 | 235 | 106 | 46  | 7             | 1000  | 5733       | 370    |
| Karnataka                | 51                                          | 111 | 179 | 188 | 166 | 142 | 129 | 30  | 5             | 1000  | 14951      | 756    |
| Kerala                   | 62                                          | 75  | 126 | 166 | 183 | 133 | 201 | 40  | 14            | 1000  | 19699      | 971    |
| Madhya Pradesh           | 76                                          | 110 | 108 | 170 | 165 | 153 | 162 | 48  | 10            | 1000  | 19166      | 871    |
| Maharashtra              | 70                                          | 85  | 121 | 164 | 220 | 155 | 141 | 35  | 8             | 1000  | 38001      | 1388   |
| Manipur                  | 170                                         | 60  | 102 | 116 | 95  | 191 | 180 | 82  | 4             | 1000  | 456        | 278    |
| Meghalaya                | 69                                          | 80  | 116 | 123 | 91  | 194 | 265 | 54  | 6             | 1000  | 479        | 141    |
| Mizoram                  | 178                                         | 175 | 104 | 124 | 95  | 155 | 150 | 12  | 6             | 1000  | 137        | 152    |
| Nagaland                 | 137                                         | 0   | 128 | 42  | 0   | 77  | 476 | 140 | 0             | 1000  | 47         | 29     |
| Orissa                   | 62                                          | 149 | 148 | 172 | 194 | 106 | 131 | 28  | 9             | 1000  | 13339      | 596    |
| Punjab                   | 10                                          | 53  | 115 | 197 | 177 | 210 | 180 | 50  | 8             | 1000  | 8865       | 403    |
| Rajasthan                | 35                                          | 78  | 87  | 155 | 172 | 159 | 226 | 75  | 14            | 1000  | 16075      | 849    |
| Sikkim                   | 116                                         | 78  | 68  | 156 | 189 | 112 | 188 | 66  | 27            | 1000  | 116        | 107    |
| Tamil Nadu               | 66                                          | 141 | 193 | 186 | 158 | 110 | 120 | 22  | 3             | 1000  | 26130      | 1199   |
| Tripura                  | 27                                          | 130 | 105 | 168 | 194 | 213 | 143 | 21  | 0             | 1000  | 812        | 189    |
| Uttaranchal              | 46                                          | 105 | 151 | 235 | 225 | 109 | 101 | 29  | 0             | 1000  | 2884       | 139    |
| Uttar Pradesh            | 56                                          | 85  | 117 | 166 | 169 | 192 | 164 | 34  | 16            | 1000  | 50887      | 2270   |
| West Bengal              | 69                                          | 75  | 159 | 178 | 146 | 133 | 171 | 50  | 20            | 1000  | 26787      | 1192   |
| A & N Islands            | 128                                         | 98  | 26  | 145 | 83  | 251 | 255 | 0   | 13            | 1000  | 58         | 37     |

Continued

Table (10): Per 1000 distribution of aged persons by number of living children for each sex and State/UT

| Rural +Urban<br>state/ut          | aged persons with number of living children |       |       |       |       |       |       |       |               |        | Females<br>no. of aged persons |        |
|-----------------------------------|---------------------------------------------|-------|-------|-------|-------|-------|-------|-------|---------------|--------|--------------------------------|--------|
|                                   | 0                                           | 1     | 2     | 3     | 4     | 5     | 6-7   | 8-9   | 10 &<br>above | total  | estd. (00)                     | sample |
| (1)                               | (2)                                         | (3)   | (4)   | (5)   | (6)   | (7)   | (8)   | (9)   | (10)          | (11)   | (12)                           | (13)   |
| Chandigarh                        | 50                                          | 31    | 205   | 229   | 252   | 116   | 81    | 35    | 0             | 1000   | 155                            | 79     |
| Dadra & N. Haveli                 | 42                                          | 0     | 88    | 372   | 395   | 40    | 37    | 26    | 0             | 1000   | 42                             | 24     |
| Daman & Diu                       | 23                                          | 99    | 174   | 179   | 46    | 67    | 340   | 72    | 0             | 1000   | 29                             | 35     |
| Lakshadweep                       | 132                                         | 93    | 110   | 204   | 92    | 163   | 199   | 7     | 0             | 1000   | 19                             | 46     |
| Pondicherry                       | 71                                          | 53    | 138   | 202   | 212   | 120   | 180   | 23    | 0             | 1000   | 516                            | 74     |
| ONES                              | 93                                          | 103   | 98    | 143   | 142   | 192   | 181   | 45    | 4             | 1000   | 2257                           | 1044   |
| GUTs                              | 69                                          | 52    | 141   | 211   | 211   | 124   | 165   | 25    | 1             | 1000   | 821                            | 295    |
| all-India                         | 59                                          | 95    | 132   | 173   | 179   | 159   | 155   | 38    | 10            | 1000   | 331775                         | 17081  |
| estd. no. of aged<br>persons (00) | 19483                                       | 31463 | 43696 | 57530 | 59500 | 52618 | 51543 | 12631 | 3310          | 331775 | X                              | X      |
| sample aged persons               | 1078                                        | 1524  | 2098  | 2940  | 3051  | 2751  | 2735  | 718   | 186           | 17081  | X                              | X      |

Table (10): Per 1000 distribution of aged persons by number of living children for each sex and State/UT

| Rural +Urban<br>state/ut | aged persons with number of living children |     |     |     |     |     |     |     |            |       | Persons    |        |
|--------------------------|---------------------------------------------|-----|-----|-----|-----|-----|-----|-----|------------|-------|------------|--------|
|                          | 0                                           | 1   | 2   | 3   | 4   | 5   | 6-7 | 8-9 | 10 & above | total | estd. (00) | sample |
|                          | (1)                                         | (2) | (3) | (4) | (5) | (6) | (7) | (8) | (9)        | (10)  | (11)       | (12)   |
| Andhra Pradesh           | 56                                          | 120 | 160 | 202 | 187 | 124 | 125 | 20  | 7          | 1000  | 50236      | 2183   |
| Arunachal Pradesh        | 211                                         | 134 | 76  | 138 | 158 | 157 | 102 | 22  | 1          | 1000  | 460        | 330    |
| Assam                    | 48                                          | 36  | 72  | 210 | 264 | 221 | 121 | 22  | 4          | 1000  | 11556      | 988    |
| Bihar                    | 53                                          | 62  | 122 | 199 | 181 | 203 | 133 | 37  | 11         | 1000  | 38403      | 1904   |
| Chhattisgarh             | 99                                          | 70  | 103 | 182 | 217 | 152 | 154 | 11  | 12         | 1000  | 12690      | 645    |
| Delhi                    | 37                                          | 101 | 192 | 193 | 184 | 153 | 133 | 3   | 4          | 1000  | 5002       | 451    |
| Goa                      | 92                                          | 72  | 87  | 246 | 355 | 100 | 26  | 21  | 0          | 1000  | 1606       | 123    |
| Gujarat                  | 34                                          | 65  | 133 | 185 | 205 | 163 | 152 | 54  | 7          | 1000  | 30551      | 1337   |
| Haryana                  | 18                                          | 19  | 65  | 144 | 207 | 207 | 260 | 74  | 7          | 1000  | 14158      | 759    |
| Himachal Pradesh         | 81                                          | 133 | 118 | 145 | 155 | 185 | 150 | 28  | 5          | 1000  | 5240       | 792    |
| Jammu & Kashmir          | 31                                          | 93  | 101 | 207 | 165 | 206 | 148 | 49  | 2          | 1000  | 4545       | 596    |
| Jharkhand                | 63                                          | 78  | 99  | 190 | 178 | 226 | 127 | 28  | 11         | 1000  | 13505      | 866    |
| Karnataka                | 43                                          | 85  | 180 | 208 | 174 | 133 | 139 | 32  | 5          | 1000  | 30618      | 1529   |
| Kerala                   | 48                                          | 70  | 145 | 173 | 192 | 130 | 191 | 39  | 12         | 1000  | 35359      | 1766   |
| Madhya Pradesh           | 74                                          | 92  | 105 | 173 | 173 | 146 | 180 | 46  | 10         | 1000  | 37947      | 1739   |
| Maharashtra              | 51                                          | 68  | 132 | 191 | 228 | 159 | 126 | 35  | 9          | 1000  | 74193      | 2701   |
| Manipur                  | 179                                         | 60  | 82  | 124 | 115 | 192 | 177 | 66  | 5          | 1000  | 1043       | 605    |
| Meghalaya                | 74                                          | 78  | 135 | 167 | 99  | 162 | 235 | 43  | 8          | 1000  | 988        | 271    |
| Mizoram                  | 162                                         | 165 | 83  | 139 | 94  | 175 | 167 | 8   | 7          | 1000  | 341        | 383    |
| Nagaland                 | 93                                          | 34  | 125 | 125 | 113 | 95  | 301 | 115 | 0          | 1000  | 224        | 109    |
| Orissa                   | 60                                          | 116 | 144 | 191 | 206 | 112 | 129 | 35  | 7          | 1000  | 28256      | 1269   |
| Punjab                   | 26                                          | 50  | 114 | 213 | 180 | 190 | 181 | 35  | 11         | 1000  | 18274      | 826    |
| Rajasthan                | 44                                          | 82  | 95  | 150 | 169 | 150 | 232 | 69  | 9          | 1000  | 31284      | 1672   |
| Sikkim                   | 76                                          | 76  | 72  | 139 | 210 | 171 | 170 | 68  | 16         | 1000  | 242        | 233    |
| Tamil Nadu               | 52                                          | 117 | 200 | 219 | 165 | 116 | 109 | 19  | 3          | 1000  | 51046      | 2357   |
| Tripura                  | 27                                          | 98  | 111 | 200 | 184 | 224 | 127 | 26  | 2          | 1000  | 1869       | 405    |
| Uttaranchal              | 58                                          | 79  | 138 | 195 | 220 | 153 | 107 | 49  | 0          | 1000  | 6116       | 290    |
| Uttar Pradesh            | 67                                          | 80  | 106 | 156 | 171 | 185 | 178 | 40  | 18         | 1000  | 102779     | 4715   |
| West Bengal              | 64                                          | 73  | 163 | 181 | 152 | 141 | 159 | 48  | 18         | 1000  | 53642      | 2394   |
| A & N Islands            | 57                                          | 37  | 72  | 219 | 179 | 208 | 176 | 46  | 5          | 1000  | 152        | 89     |

Continued

Table (10): Per 1000 distribution of aged persons by number of living children for each sex and State/UT

| Rural +Urban<br>state/ut          | aged persons with number of living children |       |       |        |        |        |        |       |               |        | Persons    |        |
|-----------------------------------|---------------------------------------------|-------|-------|--------|--------|--------|--------|-------|---------------|--------|------------|--------|
|                                   | 0                                           | 1     | 2     | 3      | 4      | 5      | 6-7    | 8-9   | 10 &<br>above | total  | estd. (00) | sample |
| (1)                               | (2)                                         | (3)   | (4)   | (5)    | (6)    | (7)    | (8)    | (9)   | (10)          | (11)   | (12)       | (13)   |
| Chandigarh                        | 23                                          | 35    | 232   | 293    | 234    | 99     | 68     | 16    | 0             | 1000   | 360        | 165    |
| Dadra & N. Haveli                 | 14                                          | 63    | 60    | 394    | 302    | 109    | 50     | 9     | 0             | 1000   | 124        | 57     |
| Daman & Diu                       | 39                                          | 67    | 196   | 145    | 118    | 87     | 277    | 49    | 23            | 1000   | 43         | 58     |
| Lakshadweep                       | 106                                         | 100   | 93    | 221    | 88     | 200    | 140    | 12    | 40            | 1000   | 35         | 83     |
| Pondicherry                       | 55                                          | 89    | 119   | 199    | 206    | 126    | 171    | 36    | 0             | 1000   | 895        | 141    |
| ONES                              | 97                                          | 90    | 104   | 163    | 144    | 188    | 168    | 42    | 4             | 1000   | 5167       | 2336   |
| GUTs                              | 45                                          | 70    | 137   | 236    | 212    | 127    | 141    | 30    | 2             | 1000   | 1609       | 593    |
| all-India                         | 55                                          | 82    | 133   | 184    | 186    | 157    | 154    | 38    | 10            | 1000   | 663779     | 34831  |
| estd. no. of aged<br>persons (00) | 36766                                       | 54278 | 88342 | 122423 | 123425 | 104257 | 102406 | 25066 | 6815          | 663779 | X          | X      |
| sample aged persons               | 2066                                        | 2747  | 4393  | 6341   | 6414   | 5616   | 5434   | 1421  | 399           | 34831  | X          | X      |

Table (11): Per 1000 distribution of aged persons by state of economic independence for each sex

| Rural<br>state/ut                 | state of economic independence of aged persons |                                     |                                 |      |        | no. of aged persons |        |
|-----------------------------------|------------------------------------------------|-------------------------------------|---------------------------------|------|--------|---------------------|--------|
|                                   | not<br>dependent<br>on others                  | partially<br>dependent<br>on others | fully<br>dependent<br>on others | n.r. | total  | estd. (00)          | sample |
| (1)                               | (2)                                            | (3)                                 | (4)                             | (5)  | (6)    | (7)                 | (8)    |
| Andhra Pradesh                    | 486                                            | 111                                 | 394                             | 10   | 1000   | 18730               | 697    |
| Arunachal Pradesh                 | 319                                            | 376                                 | 60                              | 244  | 1000   | 238                 | 140    |
| Assam                             | 443                                            | 242                                 | 279                             | 37   | 1000   | 6103                | 471    |
| Bihar                             | 582                                            | 156                                 | 248                             | 15   | 1000   | 18861               | 912    |
| Chhattisgarh                      | 538                                            | 101                                 | 329                             | 33   | 1000   | 4609                | 204    |
| Delhi                             | 405                                            | 255                                 | 340                             | 0    | 1000   | 338                 | 16     |
| Goa                               | 834                                            | 90                                  | 76                              | 0    | 1000   | 506                 | 19     |
| Gujarat                           | 494                                            | 147                                 | 354                             | 6    | 1000   | 10458               | 351    |
| Haryana                           | 376                                            | 380                                 | 243                             | 1    | 1000   | 5608                | 252    |
| Himachal Pradesh                  | 578                                            | 181                                 | 222                             | 19   | 1000   | 2400                | 347    |
| Jammu & Kashmir                   | 653                                            | 119                                 | 205                             | 23   | 1000   | 2246                | 230    |
| Jharkhand                         | 552                                            | 166                                 | 271                             | 10   | 1000   | 6400                | 330    |
| Karnataka                         | 541                                            | 137                                 | 321                             | 1    | 1000   | 11642               | 428    |
| Kerala                            | 361                                            | 204                                 | 432                             | 2    | 1000   | 11673               | 505    |
| Madhya Pradesh                    | 576                                            | 105                                 | 297                             | 23   | 1000   | 14666               | 549    |
| Maharashtra                       | 490                                            | 166                                 | 341                             | 3    | 1000   | 23347               | 717    |
| Manipur                           | 278                                            | 299                                 | 231                             | 192  | 1000   | 395                 | 211    |
| Meghalaya                         | 575                                            | 191                                 | 217                             | 18   | 1000   | 467                 | 96     |
| Mizoram                           | 566                                            | 206                                 | 142                             | 86   | 1000   | 119                 | 89     |
| Nagaland                          | 486                                            | 319                                 | 162                             | 33   | 1000   | 109                 | 56     |
| Orissa                            | 447                                            | 206                                 | 324                             | 23   | 1000   | 13371               | 525    |
| Punjab                            | 455                                            | 168                                 | 363                             | 14   | 1000   | 6843                | 258    |
| Rajasthan                         | 469                                            | 147                                 | 377                             | 7    | 1000   | 12196               | 552    |
| Sikkim                            | 611                                            | 205                                 | 179                             | 6    | 1000   | 115                 | 110    |
| Tamil Nadu                        | 487                                            | 159                                 | 355                             | 0    | 1000   | 16961               | 571    |
| Tripura                           | 457                                            | 170                                 | 353                             | 21   | 1000   | 927                 | 171    |
| Uttaranchal                       | 615                                            | 49                                  | 277                             | 59   | 1000   | 2674                | 102    |
| Uttar Pradesh                     | 598                                            | 100                                 | 279                             | 22   | 1000   | 42788               | 1825   |
| West Bengal                       | 462                                            | 182                                 | 331                             | 25   | 1000   | 18130               | 680    |
| A & N Islands                     | 844                                            | 34                                  | 122                             | 0    | 1000   | 76                  | 34     |
| Chandigarh                        | 980                                            | 20                                  | 0                               | 0    | 1000   | 7                   | 17     |
| Dadra & N. Haveli                 | 166                                            | 537                                 | 297                             | 0    | 1000   | 78                  | 20     |
| Daman & Diu                       | 744                                            | 256                                 | 0                               | 0    | 1000   | 4                   | 7      |
| Lakshadweep                       | 301                                            | 136                                 | 564                             | 0    | 1000   | 7                   | 16     |
| Pondicherry                       | 697                                            | 49                                  | 254                             | 0    | 1000   | 160                 | 20     |
| ONES                              | 451                                            | 226                                 | 248                             | 74   | 1000   | 2371                | 873    |
| GUTs                              | 605                                            | 164                                 | 232                             | 0    | 1000   | 333                 | 114    |
| all-India                         | 513                                            | 152                                 | 320                             | 15   | 1000   | 253254              | 11528  |
| estd. no. of aged persons<br>(00) | 129840                                         | 38598                               | 81116                           | 3700 | 253254 | X                   | X      |
| sample aged persons               | 5855                                           | 1834                                | 3638                            | 201  | 11528  | X                   | X      |

Table (11): Per 1000 distribution of aged persons by state of economic independence for each sex

| Rural<br>state/ut                 | state of economic independence of aged persons |                                     |                                 |      |        | Females<br>no. of aged persons |        |
|-----------------------------------|------------------------------------------------|-------------------------------------|---------------------------------|------|--------|--------------------------------|--------|
|                                   | not<br>dependent<br>on others                  | partially<br>dependent<br>on others | fully<br>dependent<br>on others | n.r. | total  | estd. (00)                     | sample |
| (1)                               | (2)                                            | (3)                                 | (4)                             | (5)  | (6)    | (7)                            | (8)    |
| Andhra Pradesh                    | 148                                            | 112                                 | 729                             | 10   | 1000   | 20035                          | 688    |
| Arunachal Pradesh                 | 108                                            | 401                                 | 347                             | 145  | 1000   | 204                            | 118    |
| Assam                             | 81                                             | 52                                  | 814                             | 53   | 1000   | 4273                           | 323    |
| Bihar                             | 167                                            | 117                                 | 696                             | 19   | 1000   | 15258                          | 678    |
| Chhattisgarh                      | 262                                            | 107                                 | 608                             | 24   | 1000   | 6680                           | 290    |
| Delhi                             | 0                                              | 287                                 | 713                             | 0    | 1000   | 322                            | 17     |
| Goa                               | 260                                            | 123                                 | 618                             | 0    | 1000   | 615                            | 32     |
| Gujarat                           | 129                                            | 98                                  | 772                             | 1    | 1000   | 10401                          | 370    |
| Haryana                           | 127                                            | 430                                 | 444                             | 0    | 1000   | 5510                           | 232    |
| Himachal Pradesh                  | 183                                            | 150                                 | 635                             | 32   | 1000   | 2546                           | 346    |
| Jammu & Kashmir                   | 107                                            | 126                                 | 760                             | 7    | 1000   | 1555                           | 173    |
| Jharkhand                         | 166                                            | 107                                 | 706                             | 20   | 1000   | 4441                           | 231    |
| Karnataka                         | 148                                            | 112                                 | 731                             | 9    | 1000   | 10878                          | 403    |
| Kerala                            | 102                                            | 183                                 | 700                             | 15   | 1000   | 15013                          | 649    |
| Madhya Pradesh                    | 152                                            | 122                                 | 698                             | 28   | 1000   | 14701                          | 544    |
| Maharashtra                       | 183                                            | 129                                 | 682                             | 7    | 1000   | 24333                          | 716    |
| Manipur                           | 89                                             | 294                                 | 485                             | 132  | 1000   | 279                            | 163    |
| Meghalaya                         | 177                                            | 230                                 | 544                             | 49   | 1000   | 431                            | 95     |
| Mizoram                           | 124                                            | 196                                 | 531                             | 149  | 1000   | 76                             | 48     |
| Nagaland                          | 230                                            | 444                                 | 326                             | 0    | 1000   | 39                             | 24     |
| Orissa                            | 75                                             | 124                                 | 774                             | 27   | 1000   | 12157                          | 483    |
| Punjab                            | 100                                            | 189                                 | 709                             | 2    | 1000   | 6518                           | 239    |
| Rajasthan                         | 95                                             | 127                                 | 778                             | 0    | 1000   | 12999                          | 583    |
| Sikkim                            | 111                                            | 194                                 | 618                             | 76   | 1000   | 109                            | 94     |
| Tamil Nadu                        | 193                                            | 165                                 | 642                             | 0    | 1000   | 17146                          | 549    |
| Tripura                           | 92                                             | 77                                  | 815                             | 16   | 1000   | 675                            | 135    |
| Uttaranchal                       | 350                                            | 47                                  | 593                             | 10   | 1000   | 2190                           | 90     |
| Uttar Pradesh                     | 127                                            | 79                                  | 770                             | 24   | 1000   | 41298                          | 1649   |
| West Bengal                       | 64                                             | 82                                  | 820                             | 34   | 1000   | 18472                          | 686    |
| A & N Islands                     | 463                                            | 98                                  | 283                             | 156  | 1000   | 43                             | 15     |
| Chandigarh                        | 253                                            | 147                                 | 600                             | 0    | 1000   | 8                              | 11     |
| Dadra & N. Haveli                 | 122                                            | 327                                 | 551                             | 0    | 1000   | 39                             | 10     |
| Daman & Diu                       | 254                                            | 0                                   | 746                             | 0    | 1000   | 13                             | 13     |
| Lakshadweep                       | 184                                            | 0                                   | 816                             | 0    | 1000   | 9                              | 22     |
| Pondicherry                       | 439                                            | 321                                 | 240                             | 0    | 1000   | 148                            | 18     |
| ONES                              | 119                                            | 203                                 | 613                             | 65   | 1000   | 1813                           | 677    |
| GUTs                              | 372                                            | 252                                 | 350                             | 26   | 1000   | 261                            | 89     |
| all-India                         | 139                                            | 124                                 | 720                             | 16   | 1000   | 249416                         | 10737  |
| estd. no. of aged persons<br>(00) | 34658                                          | 30995                               | 179695                          | 4068 | 249416 | X                              | X      |
| sample aged persons               | 1411                                           | 1400                                | 7710                            | 216  | 10737  | X                              | X      |



Table (11): Per 1000 distribution of aged persons by state of economic independence for each sex

| Rural<br>state/ut                 | state of economic independence of aged persons |                                     |                                 |      |        | Persons    |        |
|-----------------------------------|------------------------------------------------|-------------------------------------|---------------------------------|------|--------|------------|--------|
|                                   | not<br>dependent<br>on others                  | partially<br>dependent<br>on others | fully<br>dependent<br>on others | n.r. | total  | estd. (00) | sample |
|                                   | (1)                                            | (2)                                 | (3)                             | (4)  | (5)    | (6)        | (7)    |
| Andhra Pradesh                    | 312                                            | 112                                 | 567                             | 10   | 1000   | 38765      | 1385   |
| Arunachal Pradesh                 | 222                                            | 388                                 | 192                             | 198  | 1000   | 442        | 258    |
| Assam                             | 294                                            | 163                                 | 499                             | 43   | 1000   | 10376      | 794    |
| Bihar                             | 396                                            | 138                                 | 448                             | 17   | 1000   | 34119      | 1590   |
| Chhattisgarh                      | 374                                            | 104                                 | 494                             | 27   | 1000   | 11289      | 494    |
| Delhi                             | 207                                            | 271                                 | 522                             | 0    | 1000   | 661        | 33     |
| Goa                               | 519                                            | 108                                 | 373                             | 0    | 1000   | 1121       | 51     |
| Gujarat                           | 312                                            | 122                                 | 563                             | 3    | 1000   | 20859      | 721    |
| Haryana                           | 252                                            | 404                                 | 343                             | 1    | 1000   | 11118      | 484    |
| Himachal Pradesh                  | 375                                            | 165                                 | 434                             | 26   | 1000   | 4946       | 693    |
| Jammu & Kashmir                   | 430                                            | 122                                 | 432                             | 16   | 1000   | 3801       | 403    |
| Jharkhand                         | 394                                            | 142                                 | 449                             | 14   | 1000   | 10841      | 561    |
| Karnataka                         | 352                                            | 125                                 | 519                             | 5    | 1000   | 22520      | 831    |
| Kerala                            | 216                                            | 192                                 | 582                             | 9    | 1000   | 26687      | 1154   |
| Madhya Pradesh                    | 364                                            | 113                                 | 498                             | 25   | 1000   | 29367      | 1093   |
| Maharashtra                       | 333                                            | 147                                 | 515                             | 5    | 1000   | 47679      | 1433   |
| Manipur                           | 200                                            | 297                                 | 336                             | 167  | 1000   | 673        | 374    |
| Meghalaya                         | 384                                            | 210                                 | 373                             | 33   | 1000   | 898        | 191    |
| Mizoram                           | 394                                            | 202                                 | 294                             | 110  | 1000   | 196        | 137    |
| Nagaland                          | 419                                            | 352                                 | 205                             | 24   | 1000   | 148        | 80     |
| Orissa                            | 270                                            | 167                                 | 538                             | 25   | 1000   | 25527      | 1008   |
| Punjab                            | 282                                            | 178                                 | 532                             | 8    | 1000   | 13361      | 497    |
| Rajasthan                         | 276                                            | 136                                 | 584                             | 3    | 1000   | 25196      | 1135   |
| Sikkim                            | 368                                            | 199                                 | 392                             | 40   | 1000   | 224        | 204    |
| Tamil Nadu                        | 339                                            | 162                                 | 499                             | 0    | 1000   | 34107      | 1120   |
| Tripura                           | 303                                            | 131                                 | 547                             | 19   | 1000   | 1602       | 306    |
| Uttaranchal                       | 496                                            | 48                                  | 419                             | 37   | 1000   | 4865       | 192    |
| Uttar Pradesh                     | 367                                            | 90                                  | 520                             | 23   | 1000   | 84086      | 3474   |
| West Bengal                       | 261                                            | 131                                 | 578                             | 29   | 1000   | 36602      | 1366   |
| A & N Islands                     | 706                                            | 57                                  | 180                             | 56   | 1000   | 120        | 49     |
| Chandigarh                        | 591                                            | 88                                  | 321                             | 0    | 1000   | 16         | 28     |
| Dadra & N. Haveli                 | 151                                            | 468                                 | 381                             | 0    | 1000   | 117        | 30     |
| Daman & Diu                       | 368                                            | 60                                  | 572                             | 0    | 1000   | 17         | 20     |
| Lakshadweep                       | 236                                            | 60                                  | 704                             | 0    | 1000   | 16         | 38     |
| Pondicherry                       | 573                                            | 179                                 | 247                             | 0    | 1000   | 309        | 38     |
| ONES                              | 307                                            | 216                                 | 406                             | 70   | 1000   | 4184       | 1550   |
| GUTs                              | 502                                            | 202                                 | 284                             | 11   | 1000   | 594        | 203    |
| all-India                         | 327                                            | 138                                 | 519                             | 15   | 1000   | 502670     | 22265  |
| estd. no. of aged persons<br>(00) | 164498                                         | 69592                               | 260811                          | 7768 | 502670 | X          | X      |
| sample aged persons               | 7266                                           | 3234                                | 11348                           | 417  | 22265  | X          | X      |

Table (11): Per 1000 distribution of aged persons by state of economic independence for each sex

| state/ut                       | state of economic independence of aged persons |                               |                           |      |       | no. of aged persons |        |
|--------------------------------|------------------------------------------------|-------------------------------|---------------------------|------|-------|---------------------|--------|
|                                | not dependent on others                        | partially dependent on others | fully dependent on others | n.r. | total | estd. (00)          | sample |
| (1)                            | (2)                                            | (3)                           | (4)                       | (5)  | (6)   | (7)                 | (8)    |
| Andhra Pradesh                 | 567                                            | 104                           | 327                       | 3    | 1000  | 5310                | 377    |
| Arunachal Pradesh              | 313                                            | 318                           | 274                       | 95   | 1000  | 10                  | 42     |
| Assam                          | 563                                            | 151                           | 286                       | 0    | 1000  | 647                 | 109    |
| Bihar                          | 441                                            | 123                           | 379                       | 57   | 1000  | 2455                | 169    |
| Chhattisgarh                   | 587                                            | 169                           | 243                       | 0    | 1000  | 641                 | 63     |
| Delhi                          | 613                                            | 78                            | 295                       | 14   | 1000  | 2212                | 211    |
| Goa                            | 376                                            | 350                           | 274                       | 0    | 1000  | 229                 | 32     |
| Gujarat                        | 525                                            | 114                           | 362                       | 0    | 1000  | 4592                | 297    |
| Haryana                        | 487                                            | 202                           | 305                       | 6    | 1000  | 1315                | 132    |
| Himachal Pradesh               | 723                                            | 77                            | 200                       | 0    | 1000  | 139                 | 49     |
| Jammu & Kashmir                | 624                                            | 84                            | 285                       | 7    | 1000  | 408                 | 102    |
| Jharkhand                      | 498                                            | 218                           | 279                       | 4    | 1000  | 1372                | 166    |
| Karnataka                      | 545                                            | 97                            | 349                       | 9    | 1000  | 4025                | 345    |
| Kerala                         | 468                                            | 183                           | 345                       | 4    | 1000  | 3986                | 290    |
| Madhya Pradesh                 | 637                                            | 70                            | 276                       | 17   | 1000  | 4115                | 319    |
| Maharashtra                    | 497                                            | 202                           | 293                       | 8    | 1000  | 12844               | 596    |
| Manipur                        | 380                                            | 348                           | 168                       | 105  | 1000  | 192                 | 116    |
| Meghalaya                      | 909                                            | 46                            | 45                        | 0    | 1000  | 42                  | 34     |
| Mizoram                        | 508                                            | 217                           | 142                       | 133  | 1000  | 85                  | 142    |
| Nagaland                       | 730                                            | 256                           | 14                        | 0    | 1000  | 68                  | 24     |
| Orissa                         | 502                                            | 153                           | 333                       | 12   | 1000  | 1546                | 148    |
| Punjab                         | 496                                            | 142                           | 337                       | 25   | 1000  | 2565                | 165    |
| Rajasthan                      | 552                                            | 136                           | 310                       | 2    | 1000  | 3012                | 271    |
| Sikkim                         | 761                                            | 91                            | 149                       | 0    | 1000  | 11                  | 16     |
| Tamil Nadu                     | 543                                            | 139                           | 318                       | 0    | 1000  | 7955                | 587    |
| Tripura                        | 526                                            | 179                           | 295                       | 0    | 1000  | 130                 | 45     |
| Uttaranchal                    | 827                                            | 59                            | 114                       | 0    | 1000  | 558                 | 49     |
| Uttar Pradesh                  | 602                                            | 96                            | 290                       | 13   | 1000  | 9104                | 620    |
| West Bengal                    | 658                                            | 101                           | 227                       | 14   | 1000  | 8725                | 522    |
| A & N Islands                  | 857                                            | 0                             | 114                       | 29   | 1000  | 18                  | 18     |
| Chandigarh                     | 883                                            | 79                            | 38                        | 0    | 1000  | 197                 | 69     |
| Dadra & N. Haveli              | 345                                            | 231                           | 424                       | 0    | 1000  | 4                   | 13     |
| Daman & Diu                    | 270                                            | 358                           | 372                       | 0    | 1000  | 10                  | 16     |
| Lakshadweep                    | 91                                             | 634                           | 275                       | 0    | 1000  | 8                   | 21     |
| Pondicherry                    | 455                                            | 134                           | 411                       | 0    | 1000  | 218                 | 47     |
| ONES                           | 528                                            | 245                           | 167                       | 60   | 1000  | 538                 | 419    |
| GUTs                           | 645                                            | 119                           | 235                       | 1    | 1000  | 455                 | 184    |
| all-India                      | 555                                            | 134                           | 301                       | 10   | 1000  | 78751               | 6222   |
| estd. no. of aged persons (00) | 43733                                          | 10529                         | 23710                     | 779  | 78751 | X                   | X      |
| sample aged persons            | 3512                                           | 833                           | 1804                      | 73   | 6222  | X                   | X      |

Table (11): Per 1000 distribution of aged persons by state of economic independence for each sex

| Urban                          |                                                |                               |                           |      |       | Females             |        |
|--------------------------------|------------------------------------------------|-------------------------------|---------------------------|------|-------|---------------------|--------|
| state/ut                       | state of economic independence of aged persons |                               |                           |      |       | no. of aged persons |        |
|                                | not dependent on others                        | partially dependent on others | fully dependent on others | n.r. | total | estd. (00)          | sample |
| (1)                            | (2)                                            | (3)                           | (4)                       | (5)  | (6)   | (7)                 | (8)    |
| Andhra Pradesh                 | 246                                            | 92                            | 646                       | 15   | 1000  | 6160                | 421    |
| Arunachal Pradesh              | 141                                            | 145                           | 657                       | 57   | 1000  | 7                   | 30     |
| Assam                          | 228                                            | 29                            | 673                       | 70   | 1000  | 532                 | 85     |
| Bihar                          | 157                                            | 70                            | 731                       | 42   | 1000  | 1829                | 145    |
| Chhattisgarh                   | 233                                            | 104                           | 663                       | 0    | 1000  | 760                 | 88     |
| Delhi                          | 173                                            | 84                            | 731                       | 11   | 1000  | 2129                | 207    |
| Goa                            | 36                                             | 350                           | 614                       | 0    | 1000  | 256                 | 40     |
| Gujarat                        | 117                                            | 91                            | 784                       | 9    | 1000  | 5101                | 319    |
| Haryana                        | 174                                            | 292                           | 502                       | 32   | 1000  | 1725                | 143    |
| Himachal Pradesh               | 302                                            | 144                           | 545                       | 10   | 1000  | 155                 | 50     |
| Jammu & Kashmir                | 105                                            | 51                            | 832                       | 12   | 1000  | 336                 | 91     |
| Jharkhand                      | 124                                            | 65                            | 783                       | 28   | 1000  | 1292                | 139    |
| Karnataka                      | 138                                            | 71                            | 786                       | 5    | 1000  | 4073                | 353    |
| Kerala                         | 189                                            | 155                           | 640                       | 17   | 1000  | 4686                | 322    |
| Madhya Pradesh                 | 180                                            | 117                           | 669                       | 33   | 1000  | 4466                | 327    |
| Maharashtra                    | 186                                            | 66                            | 742                       | 6    | 1000  | 13669               | 672    |
| Manipur                        | 82                                             | 161                           | 623                       | 134  | 1000  | 178                 | 115    |
| Meghalaya                      | 234                                            | 123                           | 634                       | 9    | 1000  | 48                  | 46     |
| Mizoram                        | 185                                            | 165                           | 577                       | 73   | 1000  | 60                  | 104    |
| Nagaland                       | 409                                            | 112                           | 479                       | 0    | 1000  | 8                   | 5      |
| Orissa                         | 62                                             | 98                            | 800                       | 40   | 1000  | 1182                | 113    |
| Punjab                         | 121                                            | 63                            | 805                       | 10   | 1000  | 2347                | 164    |
| Rajasthan                      | 129                                            | 82                            | 789                       | 0    | 1000  | 3076                | 266    |
| Sikkim                         | 359                                            | 262                           | 379                       | 0    | 1000  | 7                   | 13     |
| Tamil Nadu                     | 193                                            | 119                           | 688                       | 0    | 1000  | 8984                | 650    |
| Tripura                        | 243                                            | 69                            | 688                       | 0    | 1000  | 136                 | 54     |
| Uttaranchal                    | 187                                            | 70                            | 711                       | 32   | 1000  | 693                 | 49     |
| Uttar Pradesh                  | 136                                            | 82                            | 765                       | 17   | 1000  | 9590                | 621    |
| West Bengal                    | 183                                            | 84                            | 723                       | 10   | 1000  | 8315                | 506    |
| A & N Islands                  | 185                                            | 49                            | 766                       | 0    | 1000  | 15                  | 22     |
| Chandigarh                     | 403                                            | 24                            | 563                       | 10   | 1000  | 147                 | 68     |
| Dadra & N. Haveli              | 0                                              | 134                           | 866                       | 0    | 1000  | 3                   | 14     |
| Daman & Diu                    | 56                                             | 27                            | 875                       | 42   | 1000  | 16                  | 22     |
| Lakshadweep                    | 72                                             | 389                           | 539                       | 0    | 1000  | 10                  | 24     |
| Pondicherry                    | 103                                            | 173                           | 724                       | 0    | 1000  | 368                 | 56     |
| ONES                           | 173                                            | 130                           | 632                       | 65   | 1000  | 444                 | 367    |
| GUTs                           | 181                                            | 130                           | 685                       | 4    | 1000  | 560                 | 206    |
| all-India                      | 170                                            | 95                            | 721                       | 13   | 1000  | 82359               | 6344   |
| estd. no. of aged persons (00) | 14033                                          | 7855                          | 59395                     | 1076 | 82359 | X                   | X      |
| sample aged persons            | 1022                                           | 619                           | 4591                      | 112  | 6344  | X                   | X      |

Table (11): Per 1000 distribution of aged persons by state of economic independence for each sex

| Urban<br>state/ut                 | state of economic independence of aged persons |                                     |                                 |      |        |            | Persons |     |
|-----------------------------------|------------------------------------------------|-------------------------------------|---------------------------------|------|--------|------------|---------|-----|
|                                   | not<br>dependent<br>on others                  | partially<br>dependent<br>on others | fully<br>dependent<br>on others | n.r. | total  | estd. (00) | sample  |     |
|                                   | (1)                                            | (2)                                 | (3)                             | (4)  | (5)    | (6)        | (7)     | (8) |
| Andhra Pradesh                    | 395                                            | 98                                  | 498                             | 10   | 1000   | 11470      | 798     |     |
| Arunachal Pradesh                 | 242                                            | 247                                 | 432                             | 79   | 1000   | 17         | 72      |     |
| Assam                             | 412                                            | 96                                  | 461                             | 31   | 1000   | 1180       | 194     |     |
| Bihar                             | 319                                            | 101                                 | 529                             | 51   | 1000   | 4283       | 314     |     |
| Chhattisgarh                      | 395                                            | 134                                 | 471                             | 0    | 1000   | 1401       | 151     |     |
| Delhi                             | 397                                            | 81                                  | 509                             | 12   | 1000   | 4342       | 418     |     |
| Goa                               | 197                                            | 350                                 | 454                             | 0    | 1000   | 485        | 72      |     |
| Gujarat                           | 310                                            | 102                                 | 584                             | 5    | 1000   | 9693       | 616     |     |
| Haryana                           | 309                                            | 253                                 | 417                             | 21   | 1000   | 3040       | 275     |     |
| Himachal Pradesh                  | 501                                            | 112                                 | 382                             | 5    | 1000   | 294        | 99      |     |
| Jammu & Kashmir                   | 390                                            | 69                                  | 532                             | 9    | 1000   | 744        | 193     |     |
| Jharkhand                         | 317                                            | 144                                 | 524                             | 16   | 1000   | 2664       | 305     |     |
| Karnataka                         | 340                                            | 84                                  | 569                             | 7    | 1000   | 8098       | 698     |     |
| Kerala                            | 317                                            | 168                                 | 504                             | 11   | 1000   | 8672       | 612     |     |
| Madhya Pradesh                    | 399                                            | 95                                  | 481                             | 25   | 1000   | 8580       | 646     |     |
| Maharashtra                       | 337                                            | 132                                 | 524                             | 7    | 1000   | 26513      | 1268    |     |
| Manipur                           | 237                                            | 258                                 | 387                             | 119  | 1000   | 369        | 231     |     |
| Meghalaya                         | 552                                            | 86                                  | 357                             | 5    | 1000   | 90         | 80      |     |
| Mizoram                           | 373                                            | 195                                 | 323                             | 108  | 1000   | 145        | 246     |     |
| Nagaland                          | 697                                            | 242                                 | 61                              | 0    | 1000   | 76         | 29      |     |
| Orissa                            | 311                                            | 129                                 | 535                             | 24   | 1000   | 2729       | 261     |     |
| Punjab                            | 317                                            | 105                                 | 561                             | 18   | 1000   | 4912       | 329     |     |
| Rajasthan                         | 338                                            | 109                                 | 552                             | 1    | 1000   | 6088       | 537     |     |
| Sikkim                            | 600                                            | 159                                 | 241                             | 0    | 1000   | 18         | 29      |     |
| Tamil Nadu                        | 357                                            | 128                                 | 514                             | 0    | 1000   | 16939      | 1237    |     |
| Tripura                           | 381                                            | 123                                 | 496                             | 0    | 1000   | 267        | 99      |     |
| Uttaranchal                       | 472                                            | 65                                  | 445                             | 18   | 1000   | 1252       | 98      |     |
| Uttar Pradesh                     | 363                                            | 89                                  | 533                             | 15   | 1000   | 18694      | 1241    |     |
| West Bengal                       | 427                                            | 93                                  | 469                             | 12   | 1000   | 17040      | 1028    |     |
| A & N Islands                     | 550                                            | 23                                  | 411                             | 16   | 1000   | 33         | 40      |     |
| Chandigarh                        | 678                                            | 55                                  | 262                             | 4    | 1000   | 344        | 137     |     |
| Dadra & N. Haveli                 | 182                                            | 186                                 | 632                             | 0    | 1000   | 7          | 27      |     |
| Daman & Diu                       | 138                                            | 154                                 | 682                             | 26   | 1000   | 26         | 38      |     |
| Lakshadweep                       | 80                                             | 497                                 | 423                             | 0    | 1000   | 19         | 45      |     |
| Pondicherry                       | 234                                            | 158                                 | 608                             | 0    | 1000   | 586        | 103     |     |
| ONES                              | 367                                            | 193                                 | 377                             | 62   | 1000   | 983        | 786     |     |
| GUTs                              | 389                                            | 125                                 | 483                             | 3    | 1000   | 1015       | 390     |     |
| all-India                         | 359                                            | 114                                 | 516                             | 12   | 1000   | 161110     | 12566   |     |
| estd. no. of aged persons<br>(00) | 57766                                          | 18384                               | 83105                           | 1855 | 161110 | X          | X       |     |
| sample aged persons               | 4534                                           | 1452                                | 6395                            | 185  | 12566  | X          | X       |     |

Table (11): Per 1000 distribution of aged persons by state of economic independence for each sex

| Rural + Urban                  |                                                |                               |                           |      |        | Males               |        |
|--------------------------------|------------------------------------------------|-------------------------------|---------------------------|------|--------|---------------------|--------|
| state/ut                       | state of economic independence of aged persons |                               |                           |      |        | no. of aged persons |        |
|                                | not dependent on others                        | partially dependent on others | fully dependent on others | n.r. | total  | estd. (00)          | sample |
| (1)                            | (2)                                            | (3)                           | (4)                       | (5)  | (6)    | (7)                 | (8)    |
| Andhra Pradesh                 | 504                                            | 109                           | 379                       | 8    | 1000   | 24041               | 1074   |
| Arunachal Pradesh              | 319                                            | 374                           | 69                        | 238  | 1000   | 248                 | 182    |
| Assam                          | 455                                            | 233                           | 279                       | 33   | 1000   | 6750                | 580    |
| Bihar                          | 566                                            | 152                           | 263                       | 20   | 1000   | 21316               | 1081   |
| Chhattisgarh                   | 544                                            | 109                           | 318                       | 29   | 1000   | 5250                | 267    |
| Delhi                          | 585                                            | 102                           | 301                       | 12   | 1000   | 2551                | 227    |
| Goa                            | 691                                            | 171                           | 138                       | 0    | 1000   | 735                 | 51     |
| Gujarat                        | 503                                            | 137                           | 356                       | 4    | 1000   | 15050               | 648    |
| Haryana                        | 397                                            | 346                           | 255                       | 2    | 1000   | 6923                | 384    |
| Himachal Pradesh               | 586                                            | 175                           | 221                       | 18   | 1000   | 2539                | 396    |
| Jammu & Kashmir                | 649                                            | 113                           | 217                       | 20   | 1000   | 2654                | 332    |
| Jharkhand                      | 543                                            | 176                           | 272                       | 9    | 1000   | 7772                | 496    |
| Karnataka                      | 542                                            | 127                           | 328                       | 3    | 1000   | 15667               | 773    |
| Kerala                         | 389                                            | 199                           | 410                       | 3    | 1000   | 15659               | 795    |
| Madhya Pradesh                 | 589                                            | 97                            | 292                       | 22   | 1000   | 18781               | 868    |
| Maharashtra                    | 492                                            | 179                           | 324                       | 5    | 1000   | 36191               | 1313   |
| Manipur                        | 311                                            | 315                           | 211                       | 163  | 1000   | 587                 | 327    |
| Meghalaya                      | 603                                            | 179                           | 202                       | 16   | 1000   | 510                 | 130    |
| Mizoram                        | 542                                            | 210                           | 142                       | 105  | 1000   | 204                 | 231    |
| Nagaland                       | 580                                            | 295                           | 105                       | 20   | 1000   | 178                 | 80     |
| Orissa                         | 452                                            | 201                           | 325                       | 22   | 1000   | 14917               | 673    |
| Punjab                         | 466                                            | 161                           | 356                       | 17   | 1000   | 9408                | 423    |
| Rajasthan                      | 486                                            | 145                           | 364                       | 6    | 1000   | 15208               | 823    |
| Sikkim                         | 623                                            | 195                           | 176                       | 5    | 1000   | 126                 | 126    |
| Tamil Nadu                     | 505                                            | 152                           | 343                       | 0    | 1000   | 24916               | 1158   |
| Tripura                        | 466                                            | 171                           | 345                       | 18   | 1000   | 1057                | 216    |
| Uttaranchal                    | 652                                            | 51                            | 249                       | 49   | 1000   | 3232                | 151    |
| Uttar Pradesh                  | 599                                            | 100                           | 281                       | 20   | 1000   | 51892               | 2445   |
| West Bengal                    | 526                                            | 155                           | 298                       | 21   | 1000   | 26855               | 1202   |
| A & N Islands                  | 847                                            | 27                            | 120                       | 6    | 1000   | 94                  | 52     |
| Chandigarh                     | 886                                            | 77                            | 37                        | 0    | 1000   | 205                 | 86     |
| Dadra & N. Haveli              | 174                                            | 523                           | 303                       | 0    | 1000   | 82                  | 33     |
| Daman & Diu                    | 409                                            | 328                           | 263                       | 0    | 1000   | 14                  | 23     |
| Lakshadweep                    | 188                                            | 403                           | 409                       | 0    | 1000   | 15                  | 37     |
| Pondicherry                    | 558                                            | 98                            | 345                       | 0    | 1000   | 379                 | 67     |
| ONES                           | 465                                            | 230                           | 233                       | 72   | 1000   | 2909                | 1292   |
| GUTs                           | 628                                            | 138                           | 233                       | 1    | 1000   | 789                 | 298    |
| all-India                      | 523                                            | 148                           | 316                       | 13   | 1000   | 332005              | 17750  |
| estd. no. of aged persons (00) | 173573                                         | 49127                         | 104826                    | 4479 | 332005 | X                   | X      |
| sample aged persons            | 9367                                           | 2667                          | 5442                      | 274  | 17750  | X                   | X      |

Table (11): Per 1000 distribution of aged persons by state of economic independence for each sex

| Rural + Urban                  |                                                |                               |                           |      |        | Females             |        |
|--------------------------------|------------------------------------------------|-------------------------------|---------------------------|------|--------|---------------------|--------|
| state/ut                       | state of economic independence of aged persons |                               |                           |      |        | no. of aged persons |        |
|                                | not dependent on others                        | partially dependent on others | fully dependent on others | n.r. | total  | estd. (00)          | sample |
| (1)                            | (2)                                            | (3)                           | (4)                       | (5)  | (6)    | (7)                 | (8)    |
| Andhra Pradesh                 | 171                                            | 108                           | 710                       | 11   | 1000   | 26195               | 1109   |
| Arunachal Pradesh              | 109                                            | 392                           | 357                       | 142  | 1000   | 211                 | 148    |
| Assam                          | 98                                             | 49                            | 799                       | 55   | 1000   | 4806                | 408    |
| Bihar                          | 166                                            | 112                           | 700                       | 22   | 1000   | 17087               | 823    |
| Chhattisgarh                   | 259                                            | 106                           | 613                       | 21   | 1000   | 7440                | 378    |
| Delhi                          | 151                                            | 111                           | 729                       | 10   | 1000   | 2452                | 224    |
| Goa                            | 194                                            | 189                           | 617                       | 0    | 1000   | 871                 | 72     |
| Gujarat                        | 125                                            | 96                            | 776                       | 3    | 1000   | 15501               | 689    |
| Haryana                        | 138                                            | 397                           | 458                       | 8    | 1000   | 7235                | 375    |
| Himachal Pradesh               | 190                                            | 150                           | 629                       | 30   | 1000   | 2701                | 396    |
| Jammu & Kashmir                | 107                                            | 113                           | 773                       | 8    | 1000   | 1891                | 264    |
| Jharkhand                      | 157                                            | 98                            | 723                       | 22   | 1000   | 5733                | 370    |
| Karnataka                      | 146                                            | 101                           | 746                       | 8    | 1000   | 14951               | 756    |
| Kerala                         | 123                                            | 177                           | 685                       | 15   | 1000   | 19699               | 971    |
| Madhya Pradesh                 | 159                                            | 121                           | 691                       | 29   | 1000   | 19166               | 871    |
| Maharashtra                    | 184                                            | 106                           | 703                       | 7    | 1000   | 38001               | 1388   |
| Manipur                        | 86                                             | 242                           | 539                       | 133  | 1000   | 456                 | 278    |
| Meghalaya                      | 182                                            | 220                           | 553                       | 45   | 1000   | 479                 | 141    |
| Mizoram                        | 151                                            | 182                           | 551                       | 115  | 1000   | 137                 | 152    |
| Nagaland                       | 260                                            | 389                           | 352                       | 0    | 1000   | 47                  | 29     |
| Orissa                         | 74                                             | 122                           | 776                       | 28   | 1000   | 13339               | 596    |
| Punjab                         | 106                                            | 156                           | 734                       | 4    | 1000   | 8865                | 403    |
| Rajasthan                      | 101                                            | 118                           | 781                       | 0    | 1000   | 16075               | 849    |
| Sikkim                         | 127                                            | 198                           | 604                       | 72   | 1000   | 116                 | 107    |
| Tamil Nadu                     | 193                                            | 149                           | 658                       | 0    | 1000   | 26130               | 1199   |
| Tripura                        | 118                                            | 76                            | 794                       | 13   | 1000   | 812                 | 189    |
| Uttaranchal                    | 311                                            | 52                            | 621                       | 15   | 1000   | 2884                | 139    |
| Uttar Pradesh                  | 129                                            | 79                            | 769                       | 23   | 1000   | 50887               | 2270   |
| West Bengal                    | 101                                            | 83                            | 790                       | 27   | 1000   | 26787               | 1192   |
| A & N Islands                  | 391                                            | 86                            | 407                       | 116  | 1000   | 58                  | 37     |
| Chandigarh                     | 395                                            | 31                            | 565                       | 10   | 1000   | 155                 | 79     |
| Dadra & N. Haveli              | 112                                            | 312                           | 576                       | 0    | 1000   | 42                  | 24     |
| Daman & Diu                    | 147                                            | 15                            | 816                       | 23   | 1000   | 29                  | 35     |
| Lakshadweep                    | 124                                            | 209                           | 667                       | 0    | 1000   | 19                  | 46     |
| Pondicherry                    | 200                                            | 215                           | 585                       | 0    | 1000   | 516                 | 74     |
| ONES                           | 130                                            | 189                           | 617                       | 65   | 1000   | 2257                | 1044   |
| GUTs                           | 242                                            | 169                           | 578                       | 11   | 1000   | 821                 | 295    |
| all-India                      | 147                                            | 117                           | 721                       | 16   | 1000   | 331775              | 17081  |
| estd. no. of aged persons (00) | 48692                                          | 38850                         | 239090                    | 5144 | 331775 | X                   | X      |
| sample aged persons            | 2433                                           | 2019                          | 12301                     | 328  | 17081  | X                   | X      |

Table (11): Per 1000 distribution of aged persons by state of economic independence for each sex

| Rural + Urban                  |                                                |                               |                           |      |        | Persons             |        |
|--------------------------------|------------------------------------------------|-------------------------------|---------------------------|------|--------|---------------------|--------|
| state/ut                       | state of economic independence of aged persons |                               |                           |      |        | no. of aged persons |        |
|                                | not dependent on others                        | partially dependent on others | fully dependent on others | n.r. | total  | estd. (00)          | sample |
| (1)                            | (2)                                            | (3)                           | (4)                       | (5)  | (6)    | (7)                 | (8)    |
| Andhra Pradesh                 | 331                                            | 108                           | 551                       | 10   | 1000   | 50236               | 2183   |
| Arunachal Pradesh              | 222                                            | 382                           | 202                       | 194  | 1000   | 460                 | 330    |
| Assam                          | 306                                            | 157                           | 495                       | 42   | 1000   | 11556               | 988    |
| Bihar                          | 388                                            | 134                           | 457                       | 21   | 1000   | 38403               | 1904   |
| Chhattisgarh                   | 377                                            | 108                           | 491                       | 24   | 1000   | 12690               | 645    |
| Delhi                          | 372                                            | 106                           | 511                       | 11   | 1000   | 5002                | 451    |
| Goa                            | 421                                            | 181                           | 397                       | 0    | 1000   | 1606                | 123    |
| Gujarat                        | 311                                            | 116                           | 569                       | 4    | 1000   | 30551               | 1337   |
| Haryana                        | 264                                            | 372                           | 359                       | 5    | 1000   | 14158               | 759    |
| Himachal Pradesh               | 382                                            | 162                           | 431                       | 24   | 1000   | 5240                | 792    |
| Jammu & Kashmir                | 423                                            | 113                           | 448                       | 15   | 1000   | 4545                | 596    |
| Jharkhand                      | 379                                            | 143                           | 464                       | 15   | 1000   | 13505               | 866    |
| Karnataka                      | 349                                            | 114                           | 532                       | 5    | 1000   | 30618               | 1529   |
| Kerala                         | 241                                            | 186                           | 563                       | 10   | 1000   | 35359               | 1766   |
| Madhya Pradesh                 | 372                                            | 109                           | 494                       | 25   | 1000   | 37947               | 1739   |
| Maharashtra                    | 334                                            | 142                           | 518                       | 6    | 1000   | 74193               | 2701   |
| Manipur                        | 213                                            | 283                           | 354                       | 150  | 1000   | 1043                | 605    |
| Meghalaya                      | 399                                            | 199                           | 372                       | 30   | 1000   | 988                 | 271    |
| Mizoram                        | 385                                            | 199                           | 306                       | 109  | 1000   | 341                 | 383    |
| Nagaland                       | 513                                            | 314                           | 156                       | 16   | 1000   | 224                 | 109    |
| Orissa                         | 274                                            | 163                           | 538                       | 25   | 1000   | 28256               | 1269   |
| Punjab                         | 291                                            | 158                           | 539                       | 11   | 1000   | 18274               | 826    |
| Rajasthan                      | 288                                            | 131                           | 578                       | 3    | 1000   | 31284               | 1672   |
| Sikkim                         | 385                                            | 197                           | 381                       | 37   | 1000   | 242                 | 233    |
| Tamil Nadu                     | 345                                            | 151                           | 504                       | 0    | 1000   | 51046               | 2357   |
| Tripura                        | 314                                            | 129                           | 540                       | 16   | 1000   | 1869                | 405    |
| Uttaranchal                    | 491                                            | 52                            | 424                       | 33   | 1000   | 6116                | 290    |
| Uttar Pradesh                  | 366                                            | 90                            | 523                       | 21   | 1000   | 102779              | 4715   |
| West Bengal                    | 314                                            | 119                           | 543                       | 24   | 1000   | 53642               | 2394   |
| A & N Islands                  | 673                                            | 50                            | 230                       | 48   | 1000   | 152                 | 89     |
| Chandigarh                     | 674                                            | 57                            | 265                       | 4    | 1000   | 360                 | 165    |
| Dadra & N. Haveli              | 153                                            | 451                           | 396                       | 0    | 1000   | 124                 | 57     |
| Daman & Diu                    | 232                                            | 116                           | 637                       | 15   | 1000   | 43                  | 58     |
| Lakshadweep                    | 152                                            | 295                           | 553                       | 0    | 1000   | 35                  | 83     |
| Pondicherry                    | 351                                            | 166                           | 483                       | 0    | 1000   | 895                 | 141    |
| ONES                           | 319                                            | 212                           | 401                       | 69   | 1000   | 5167                | 2336   |
| GUTs                           | 431                                            | 154                           | 409                       | 6    | 1000   | 1609                | 593    |
| all-India                      | 335                                            | 133                           | 518                       | 14   | 1000   | 663779              | 34831  |
| estd. no. of aged persons (00) | 222264                                         | 87976                         | 343916                    | 9623 | 663779 | X                   | X      |
| sample aged persons            | 11800                                          | 4686                          | 17743                     | 602  | 34831  | X                   | X      |



Table (12): Per 1000 distribution of fully economically independent aged persons by number of dependants for each sex and State/UT

| Rural             |                      |     |     |     |     |     |     |           |       | Males                                |        |
|-------------------|----------------------|-----|-----|-----|-----|-----|-----|-----------|-------|--------------------------------------|--------|
| state/ut          | number of dependants |     |     |     |     |     |     |           |       | no. of eco. independent aged persons |        |
|                   | 0                    | 1   | 2   | 3   | 4   | 5   | 6-8 | 9 & above | total | estd. (00)                           | sample |
| (1)               | (2)                  | (3) | (4) | (5) | (6) | (7) | (8) | (9)       | (10)  | (11)                                 | (12)   |
| Andhra Pradesh    | 95                   | 413 | 242 | 71  | 86  | 39  | 36  | 18        | 1000  | 9103                                 | 307    |
| Arunachal Pradesh | 0                    | 91  | 352 | 200 | 102 | 121 | 93  | 41        | 1000  | 76                                   | 51     |
| Assam             | 27                   | 230 | 165 | 122 | 138 | 116 | 156 | 46        | 1000  | 2704                                 | 212    |
| Bihar             | 42                   | 225 | 262 | 113 | 101 | 57  | 145 | 55        | 1000  | 10974                                | 539    |
| Chhattisgarh      | 106                  | 218 | 248 | 88  | 107 | 91  | 100 | 41        | 1000  | 2478                                 | 110    |
| Delhi             | 321                  | 332 | 347 | 0   | 0   | 0   | 0   | 0         | 1000  | 137                                  | 6      |
| Goa               | 289                  | 550 | 102 | 58  | 0   | 0   | 0   | 0         | 1000  | 422                                  | 13     |
| Gujarat           | 219                  | 373 | 161 | 98  | 43  | 22  | 70  | 15        | 1000  | 5162                                 | 177    |
| Haryana           | 59                   | 282 | 268 | 52  | 133 | 54  | 74  | 78        | 1000  | 2106                                 | 92     |
| Himachal Pradesh  | 74                   | 368 | 269 | 74  | 61  | 27  | 118 | 9         | 1000  | 1388                                 | 184    |
| Jammu & Kashmir   | 98                   | 318 | 284 | 63  | 121 | 63  | 54  | 0         | 1000  | 1468                                 | 146    |
| Jharkhand         | 33                   | 311 | 228 | 62  | 71  | 98  | 155 | 41        | 1000  | 3533                                 | 200    |
| Karnataka         | 95                   | 346 | 157 | 131 | 111 | 66  | 65  | 30        | 1000  | 6302                                 | 234    |
| Kerala            | 22                   | 450 | 329 | 81  | 45  | 32  | 33  | 7         | 1000  | 4220                                 | 190    |
| Madhya Pradesh    | 113                  | 357 | 139 | 64  | 75  | 79  | 111 | 63        | 1000  | 8442                                 | 313    |
| Maharashtra       | 87                   | 383 | 301 | 87  | 29  | 62  | 44  | 6         | 1000  | 11432                                | 339    |
| Manipur           | 0                    | 176 | 315 | 81  | 163 | 141 | 107 | 18        | 1000  | 110                                  | 57     |
| Meghalaya         | 17                   | 133 | 424 | 105 | 136 | 13  | 171 | 0         | 1000  | 269                                  | 48     |
| Mizoram           | 0                    | 284 | 156 | 187 | 67  | 47  | 229 | 29        | 1000  | 68                                   | 54     |
| Nagaland          | 0                    | 162 | 392 | 167 | 223 | 0   | 56  | 0         | 1000  | 53                                   | 28     |
| Orissa            | 53                   | 340 | 260 | 101 | 80  | 72  | 88  | 7         | 1000  | 5973                                 | 224    |
| Punjab            | 30                   | 285 | 396 | 64  | 93  | 52  | 65  | 16        | 1000  | 3113                                 | 119    |
| Rajasthan         | 80                   | 395 | 129 | 89  | 95  | 43  | 73  | 95        | 1000  | 5726                                 | 259    |
| Sikkim            | 33                   | 104 | 326 | 242 | 75  | 83  | 131 | 5         | 1000  | 70                                   | 61     |
| Tamil Nadu        | 72                   | 420 | 245 | 125 | 54  | 46  | 35  | 4         | 1000  | 8253                                 | 263    |
| Tripura           | 20                   | 173 | 268 | 198 | 204 | 59  | 46  | 31        | 1000  | 424                                  | 77     |
| Uttaranchal       | 68                   | 215 | 142 | 109 | 145 | 224 | 91  | 5         | 1000  | 1645                                 | 73     |
| Uttar Pradesh     | 34                   | 261 | 239 | 92  | 87  | 87  | 121 | 79        | 1000  | 25604                                | 1108   |
| West Bengal       | 39                   | 236 | 225 | 149 | 142 | 55  | 115 | 38        | 1000  | 8385                                 | 302    |

Continued

Table (12): Per 1000 distribution of fully economically independent aged persons by number of dependants for each sex and State/UT

| state/ut                                   | number of dependants |       |       |       |       |      |       |           |        | Males                                |        |
|--------------------------------------------|----------------------|-------|-------|-------|-------|------|-------|-----------|--------|--------------------------------------|--------|
|                                            |                      |       |       |       |       |      |       |           |        | no. of eco. independent aged persons |        |
|                                            | 0                    | 1     | 2     | 3     | 4     | 5    | 6-8   | 9 & above | total  | estd. (00)                           | sample |
| (1)                                        | (2)                  | (3)   | (4)   | (5)   | (6)   | (7)  | (8)   | (9)       | (10)   | (11)                                 | (12)   |
| A & N Islands                              | 0                    | 211   | 383   | 152   | 244   | 10   | 0     | 0         | 1000   | 64                                   | 28     |
| Chandigarh                                 | 147                  | 727   | 43    | 50    | 34    | 0    | 0     | 0         | 1000   | 7                                    | 16     |
| Dadra & N. Haveli                          | 0                    | 232   | 768   | 0     | 0     | 0    | 0     | 0         | 1000   | 13                                   | 3      |
| Daman & Diu                                | 99                   | 154   | 0     | 747   | 0     | 0    | 0     | 0         | 1000   | 3                                    | 4      |
| Lakshadweep                                | 27                   | 80    | 0     | 0     | 216   | 69   | 608   | 0         | 1000   | 2                                    | 6      |
| Pondicherry                                | 173                  | 462   | 0     | 154   | 0     | 0    | 89    | 122       | 1000   | 112                                  | 12     |
| ONES                                       | 14                   | 159   | 321   | 164   | 159   | 59   | 105   | 19        | 1000   | 1069                                 | 376    |
| GUTs                                       | 103                  | 368   | 173   | 147   | 81    | 4    | 56    | 68        | 1000   | 202                                  | 69     |
| all-India                                  | 69                   | 321   | 234   | 97    | 85    | 65   | 90    | 40        | 1000   | 129840                               | 5855   |
| estd. no. of eco. indep. aged persons (00) | 8901                 | 41652 | 30363 | 12533 | 11007 | 8481 | 11652 | 5251      | 129840 | X                                    | X      |
| sample eco. indep. aged persons            | 361                  | 1815  | 1379  | 587   | 503   | 393  | 540   | 277       | 5855   | X                                    | X      |

Table (12): Per 1000 distribution of fully economically independent aged persons by number of dependants for each sex and State/UT

| state/ut          | number of dependants |     |     |     |     |     |     |           |       | Females<br>no. of eco. independent aged persons |        |
|-------------------|----------------------|-----|-----|-----|-----|-----|-----|-----------|-------|-------------------------------------------------|--------|
|                   | 0                    | 1   | 2   | 3   | 4   | 5   | 6-8 | 9 & above | total | estd. (00)                                      | sample |
|                   | (1)                  | (2) | (3) | (4) | (5) | (6) | (7) | (8)       | (9)   | (10)                                            | (11)   |
| Andhra Pradesh    | 365                  | 211 | 366 | 1   | 36  | 21  | 0   | 0         | 1000  | 2974                                            | 89     |
| Arunachal Pradesh | 0                    | 295 | 171 | 394 | 0   | 134 | 0   | 6         | 1000  | 22                                              | 11     |
| Assam             | 227                  | 255 | 402 | 117 | 0   | 0   | 0   | 0         | 1000  | 348                                             | 24     |
| Bihar             | 199                  | 110 | 478 | 93  | 8   | 2   | 96  | 14        | 1000  | 2553                                            | 123    |
| Chhattisgarh      | 160                  | 209 | 417 | 29  | 22  | 39  | 99  | 26        | 1000  | 1748                                            | 75     |
| Delhi             | 0                    | 0   | 0   | 0   | 0   | 0   | 0   | 0         | 0     | 0                                               | 0      |
| Goa               | 482                  | 35  | 483 | 0   | 0   | 0   | 0   | 0         | 1000  | 160                                             | 8      |
| Gujarat           | 668                  | 241 | 79  | 0   | 0   | 0   | 0   | 12        | 1000  | 1341                                            | 50     |
| Haryana           | 438                  | 32  | 450 | 0   | 59  | 0   | 0   | 21        | 1000  | 698                                             | 29     |
| Himachal Pradesh  | 364                  | 39  | 538 | 34  | 19  | 0   | 6   | 0         | 1000  | 466                                             | 63     |
| Jammu & Kashmir   | 670                  | 43  | 127 | 0   | 142 | 18  | 0   | 0         | 1000  | 167                                             | 18     |
| Jharkhand         | 220                  | 129 | 274 | 13  | 67  | 20  | 0   | 278       | 1000  | 739                                             | 29     |
| Karnataka         | 579                  | 109 | 190 | 49  | 28  | 34  | 10  | 0         | 1000  | 1614                                            | 55     |
| Kerala            | 298                  | 135 | 501 | 59  | 7   | 0   | 0   | 0         | 1000  | 1538                                            | 62     |
| Madhya Pradesh    | 484                  | 173 | 255 | 27  | 40  | 0   | 21  | 0         | 1000  | 2239                                            | 79     |
| Maharashtra       | 316                  | 156 | 419 | 73  | 13  | 2   | 20  | 0         | 1000  | 4456                                            | 112    |
| Manipur           | 59                   | 231 | 227 | 54  | 238 | 191 | 0   | 0         | 1000  | 25                                              | 14     |
| Meghalaya         | 49                   | 178 | 573 | 78  | 0   | 0   | 122 | 0         | 1000  | 76                                              | 23     |
| Mizoram           | 0                    | 450 | 144 | 165 | 0   | 0   | 241 | 0         | 1000  | 9                                               | 6      |
| Nagaland          | 0                    | 0   | 978 | 0   | 22  | 0   | 0   | 0         | 1000  | 9                                               | 5      |
| Orissa            | 113                  | 296 | 506 | 13  | 0   | 71  | 0   | 0         | 1000  | 909                                             | 36     |
| Punjab            | 199                  | 117 | 680 | 0   | 0   | 0   | 4   | 0         | 1000  | 654                                             | 23     |
| Rajasthan         | 396                  | 211 | 159 | 133 | 80  | 14  | 8   | 0         | 1000  | 1228                                            | 48     |
| Sikkim            | 0                    | 58  | 677 | 88  | 0   | 0   | 177 | 0         | 1000  | 12                                              | 10     |
| Tamil Nadu        | 460                  | 285 | 212 | 21  | 0   | 19  | 3   | 0         | 1000  | 3310                                            | 88     |
| Tripura           | 300                  | 335 | 366 | 0   | 0   | 0   | 0   | 0         | 1000  | 62                                              | 10     |
| Uttaranchal       | 341                  | 117 | 381 | 114 | 35  | 2   | 12  | 0         | 1000  | 768                                             | 37     |
| Uttar Pradesh     | 134                  | 137 | 461 | 80  | 76  | 26  | 42  | 45        | 1000  | 5257                                            | 213    |
| West Bengal       | 237                  | 261 | 446 | 46  | 0   | 10  | 0   | 0         | 1000  | 1180                                            | 48     |

Continued

Table (12): Per 1000 distribution of fully economically independent aged persons by number of dependants for each sex and State/UT

| Rural<br>state/ut                             | number of dependants |      |       |      |      |     |     |              |       | Females<br>no. of eco. independent<br>aged persons |        |
|-----------------------------------------------|----------------------|------|-------|------|------|-----|-----|--------------|-------|----------------------------------------------------|--------|
|                                               | 0                    | 1    | 2     | 3    | 4    | 5   | 6-8 | 9 &<br>above | total | estd. (00)                                         | sample |
|                                               | (2)                  | (3)  | (4)   | (5)  | (6)  | (7) | (8) | (9)          | (10)  | (11)                                               | (12)   |
| (1)                                           | (2)                  | (3)  | (4)   | (5)  | (6)  | (7) | (8) | (9)          | (10)  | (11)                                               | (12)   |
| A & N Islands                                 | 0                    | 230  | 635   | 0    | 136  | 0   | 0   | 0            | 1000  | 20                                                 | 6      |
| Chandigarh                                    | 113                  | 887  | 0     | 0    | 0    | 0   | 0   | 0            | 1000  | 2                                                  | 2      |
| Dadra & N. Haveli                             | 331                  | 669  | 0     | 0    | 0    | 0   | 0   | 0            | 1000  | 5                                                  | 2      |
| Daman & Diu                                   | 1000                 | 0    | 0     | 0    | 0    | 0   | 0   | 0            | 1000  | 3                                                  | 3      |
| Lakshadweep                                   | 339                  | 0    | 268   | 0    | 0    | 0   | 0   | 393          | 1000  | 2                                                  | 4      |
| Pondicherry                                   | 504                  | 496  | 0     | 0    | 0    | 0   | 0   | 0            | 1000  | 65                                                 | 6      |
| ONES                                          | 110                  | 239  | 436   | 86   | 28   | 36  | 64  | 1            | 1000  | 216                                                | 79     |
| GUTs                                          | 398                  | 432  | 135   | 0    | 28   | 0   | 0   | 7            | 1000  | 97                                                 | 23     |
| all-India                                     | 320                  | 175  | 370   | 50   | 30   | 15  | 24  | 16           | 1000  | 34658                                              | 1411   |
| estd. no. of eco. indep.<br>aged persons (00) | 11105                | 6061 | 12816 | 1738 | 1026 | 518 | 841 | 553          | 34658 | X                                                  | X      |
| sample eco. indep. aged<br>persons            | 416                  | 245  | 547   | 69   | 49   | 25  | 34  | 26           | 1411  | X                                                  | X      |

Table (12): Per 1000 distribution of fully economically independent aged persons by number of dependants for each sex and State/UT

| Rural<br>state/ut | number of dependants |     |     |     |     |     |     |              |       | Persons                                 |            |
|-------------------|----------------------|-----|-----|-----|-----|-----|-----|--------------|-------|-----------------------------------------|------------|
|                   | 0                    | 1   | 2   | 3   | 4   | 5   | 6-8 | 9 &<br>above | total | no. of eco. independent<br>aged persons |            |
|                   | (1)                  | (2) | (3) | (4) | (5) | (6) | (7) | (8)          | (9)   | (10)                                    | estd. (00) |
| Andhra Pradesh    | 162                  | 363 | 272 | 54  | 74  | 34  | 27  | 14           | 1000  | 12077                                   | 396        |
| Arunachal Pradesh | 0                    | 137 | 311 | 244 | 79  | 124 | 72  | 33           | 1000  | 98                                      | 62         |
| Assam             | 49                   | 232 | 192 | 122 | 123 | 103 | 138 | 41           | 1000  | 3053                                    | 236        |
| Bihar             | 71                   | 203 | 303 | 109 | 84  | 47  | 136 | 47           | 1000  | 13526                                   | 662        |
| Chhattisgarh      | 128                  | 214 | 318 | 64  | 72  | 69  | 99  | 35           | 1000  | 4226                                    | 185        |
| Delhi             | 321                  | 332 | 347 | 0   | 0   | 0   | 0   | 0            | 1000  | 137                                     | 6          |
| Goa               | 342                  | 409 | 207 | 42  | 0   | 0   | 0   | 0            | 1000  | 582                                     | 21         |
| Gujarat           | 311                  | 345 | 144 | 78  | 34  | 17  | 56  | 14           | 1000  | 6503                                    | 227        |
| Haryana           | 153                  | 220 | 313 | 39  | 115 | 40  | 55  | 64           | 1000  | 2804                                    | 121        |
| Himachal Pradesh  | 147                  | 285 | 337 | 64  | 51  | 20  | 90  | 6            | 1000  | 1854                                    | 247        |
| Jammu & Kashmir   | 157                  | 290 | 268 | 56  | 123 | 58  | 48  | 0            | 1000  | 1634                                    | 164        |
| Jharkhand         | 66                   | 280 | 236 | 53  | 70  | 85  | 128 | 82           | 1000  | 4273                                    | 229        |
| Karnataka         | 194                  | 298 | 164 | 114 | 94  | 59  | 54  | 24           | 1000  | 7916                                    | 289        |
| Kerala            | 96                   | 366 | 375 | 75  | 35  | 24  | 24  | 5            | 1000  | 5757                                    | 252        |
| Madhya Pradesh    | 190                  | 318 | 163 | 56  | 68  | 62  | 92  | 50           | 1000  | 10680                                   | 392        |
| Maharashtra       | 151                  | 319 | 334 | 83  | 25  | 45  | 38  | 5            | 1000  | 15888                                   | 451        |
| Manipur           | 11                   | 186 | 298 | 76  | 177 | 150 | 87  | 14           | 1000  | 135                                     | 71         |
| Meghalaya         | 24                   | 143 | 457 | 99  | 106 | 10  | 160 | 0            | 1000  | 345                                     | 71         |
| Mizoram           | 0                    | 304 | 155 | 184 | 59  | 41  | 231 | 26           | 1000  | 77                                      | 60         |
| Nagaland          | 0                    | 138 | 476 | 143 | 194 | 0   | 48  | 0            | 1000  | 62                                      | 33         |
| Orissa            | 61                   | 334 | 292 | 89  | 69  | 72  | 76  | 6            | 1000  | 6882                                    | 260        |
| Punjab            | 59                   | 256 | 445 | 53  | 77  | 43  | 54  | 13           | 1000  | 3767                                    | 142        |
| Rajasthan         | 136                  | 362 | 134 | 97  | 92  | 38  | 62  | 79           | 1000  | 6954                                    | 307        |
| Sikkim            | 28                   | 97  | 378 | 219 | 64  | 71  | 138 | 5            | 1000  | 83                                      | 71         |
| Tamil Nadu        | 183                  | 382 | 236 | 95  | 38  | 38  | 26  | 3            | 1000  | 11562                                   | 351        |
| Tripura           | 56                   | 194 | 281 | 173 | 177 | 52  | 40  | 27           | 1000  | 486                                     | 87         |
| Uttaranchal       | 155                  | 184 | 218 | 111 | 110 | 153 | 66  | 4            | 1000  | 2413                                    | 110        |
| Uttar Pradesh     | 51                   | 240 | 277 | 90  | 85  | 77  | 107 | 73           | 1000  | 30861                                   | 1321       |
| West Bengal       | 63                   | 239 | 252 | 137 | 125 | 50  | 101 | 33           | 1000  | 9565                                    | 350        |

Continued

Table (12): Per 1000 distribution of fully economically independent aged persons by number of dependants for each sex and State/UT

| Rural<br>state/ut                             | number of dependants |       |       |       |       |      |       |           |        | Persons    |        |
|-----------------------------------------------|----------------------|-------|-------|-------|-------|------|-------|-----------|--------|------------|--------|
|                                               | 0                    | 1     | 2     | 3     | 4     | 5    | 6-8   | 9 & above | total  | estd. (00) | sample |
|                                               | (2)                  | (3)   | (4)   | (5)   | (6)   | (7)  | (8)   | (9)       | (10)   | (12)       | (13)   |
| (1)                                           | (2)                  | (3)   | (4)   | (5)   | (6)   | (7)  | (8)   | (9)       | (10)   | (12)       | (13)   |
| A & N Islands                                 | 0                    | 216   | 442   | 116   | 218   | 8    | 0     | 0         | 1000   | 84         | 34     |
| Chandigarh                                    | 139                  | 763   | 33    | 38    | 26    | 0    | 0     | 0         | 1000   | 9          | 18     |
| Dadra & N. Haveli                             | 89                   | 350   | 562   | 0     | 0     | 0    | 0     | 0         | 1000   | 18         | 5      |
| Daman & Diu                                   | 576                  | 72    | 0     | 352   | 0     | 0    | 0     | 0         | 1000   | 6          | 7      |
| Lakshadweep                                   | 163                  | 45    | 117   | 0     | 122   | 39   | 343   | 171       | 1000   | 4          | 10     |
| Pondicherry                                   | 295                  | 475   | 0     | 97    | 0     | 0    | 56    | 77        | 1000   | 177        | 18     |
| ONES                                          | 31                   | 173   | 340   | 151   | 137   | 55   | 98    | 16        | 1000   | 1285       | 455    |
| GUTs                                          | 199                  | 389   | 161   | 99    | 64    | 3    | 38    | 48        | 1000   | 299        | 92     |
| all-India                                     | 122                  | 290   | 262   | 87    | 73    | 55   | 76    | 35        | 1000   | 164498     | 7266   |
| estd. no. of eco. indep.<br>aged persons (00) | 20006                | 47714 | 43179 | 14270 | 12033 | 8999 | 12493 | 5804      | 164498 | X          | X      |
| sample eco. indep. aged<br>persons            | 777                  | 2060  | 1926  | 656   | 552   | 418  | 574   | 303       | 7266   | X          | X      |

Table (12): Per 1000 distribution of fully economically independent aged persons by number of dependants for each sex and State/UT

| Urban<br>state/ut | number of dependants |     |     |     |     |     |     |              |       | Males<br>no. of eco. independent<br>aged persons |        |
|-------------------|----------------------|-----|-----|-----|-----|-----|-----|--------------|-------|--------------------------------------------------|--------|
|                   | 0                    | 1   | 2   | 3   | 4   | 5   | 6-8 | 9 &<br>above | total | estd. (00)                                       | sample |
|                   | (1)                  | (2) | (3) | (4) | (5) | (6) | (7) | (8)          | (9)   | (10)                                             | (11)   |
| Andhra Pradesh    | 66                   | 504 | 203 | 59  | 80  | 38  | 49  | 1            | 1000  | 3011                                             | 212    |
| Arunachal Pradesh | 0                    | 386 | 478 | 0   | 51  | 65  | 0   | 20           | 1000  | 3                                                | 12     |
| Assam             | 0                    | 231 | 251 | 338 | 120 | 54  | 7   | 0            | 1000  | 364                                              | 65     |
| Bihar             | 68                   | 214 | 201 | 83  | 92  | 58  | 155 | 130          | 1000  | 1081                                             | 92     |
| Chhattisgarh      | 156                  | 120 | 376 | 171 | 68  | 82  | 27  | 0            | 1000  | 377                                              | 36     |
| Delhi             | 70                   | 543 | 292 | 24  | 62  | 3   | 4   | 2            | 1000  | 1356                                             | 128    |
| Goa               | 0                    | 323 | 68  | 391 | 170 | 48  | 0   | 0            | 1000  | 86                                               | 14     |
| Gujarat           | 86                   | 427 | 287 | 49  | 78  | 25  | 31  | 17           | 1000  | 2409                                             | 161    |
| Haryana           | 43                   | 510 | 282 | 8   | 58  | 63  | 13  | 24           | 1000  | 640                                              | 61     |
| Himachal Pradesh  | 97                   | 441 | 335 | 115 | 12  | 0   | 0   | 0            | 1000  | 101                                              | 34     |
| Jammu & Kashmir   | 119                  | 291 | 256 | 120 | 101 | 102 | 0   | 11           | 1000  | 255                                              | 70     |
| Jharkhand         | 8                    | 197 | 372 | 107 | 76  | 60  | 113 | 67           | 1000  | 684                                              | 92     |
| Karnataka         | 87                   | 374 | 222 | 150 | 48  | 53  | 38  | 28           | 1000  | 2194                                             | 196    |
| Kerala            | 78                   | 451 | 287 | 81  | 72  | 14  | 17  | 0            | 1000  | 1867                                             | 146    |
| Madhya Pradesh    | 93                   | 503 | 150 | 52  | 76  | 61  | 33  | 32           | 1000  | 2621                                             | 202    |
| Maharashtra       | 95                   | 494 | 265 | 92  | 19  | 13  | 22  | 0            | 1000  | 6389                                             | 333    |
| Manipur           | 19                   | 147 | 179 | 111 | 184 | 236 | 90  | 34           | 1000  | 73                                               | 41     |
| Meghalaya         | 0                    | 550 | 293 | 32  | 74  | 51  | 0   | 0            | 1000  | 38                                               | 28     |
| Mizoram           | 0                    | 237 | 271 | 141 | 95  | 31  | 214 | 10           | 1000  | 43                                               | 73     |
| Nagaland          | 0                    | 134 | 127 | 207 | 88  | 179 | 264 | 0            | 1000  | 50                                               | 15     |
| Orissa            | 3                    | 365 | 204 | 108 | 133 | 154 | 27  | 6            | 1000  | 776                                              | 72     |
| Punjab            | 167                  | 389 | 234 | 152 | 26  | 27  | 6   | 0            | 1000  | 1272                                             | 79     |
| Rajasthan         | 177                  | 350 | 174 | 55  | 96  | 61  | 86  | 1            | 1000  | 1663                                             | 148    |
| Sikkim            | 0                    | 268 | 272 | 272 | 0   | 187 | 0   | 0            | 1000  | 8                                                | 11     |
| Tamil Nadu        | 137                  | 374 | 269 | 108 | 46  | 38  | 24  | 4            | 1000  | 4319                                             | 301    |
| Tripura           | 98                   | 434 | 152 | 85  | 143 | 64  | 25  | 0            | 1000  | 69                                               | 28     |
| Uttaranchal       | 32                   | 490 | 271 | 0   | 11  | 26  | 84  | 86           | 1000  | 462                                              | 38     |
| Uttar Pradesh     | 13                   | 346 | 270 | 93  | 99  | 64  | 86  | 29           | 1000  | 5483                                             | 378    |
| West Bengal       | 89                   | 287 | 298 | 132 | 105 | 40  | 43  | 6            | 1000  | 5745                                             | 340    |

Continued



Table (12): Per 1000 distribution of fully economically independent aged persons by number of dependants for each sex and State/UT

| Urban<br>state/ut                             | number of dependants |       |       |      |      |      |      |              |       | Males<br>no. of eco. independent<br>aged persons |        |
|-----------------------------------------------|----------------------|-------|-------|------|------|------|------|--------------|-------|--------------------------------------------------|--------|
|                                               | 0                    | 1     | 2     | 3    | 4    | 5    | 6-8  | 9 &<br>above | total | estd. (00)                                       | sample |
|                                               | (2)                  | (3)   | (4)   | (5)  | (6)  | (7)  | (8)  | (9)          | (10)  | (11)                                             | (12)   |
| (1)                                           | (2)                  | (3)   | (4)   | (5)  | (6)  | (7)  | (8)  | (9)          | (10)  | (11)                                             | (12)   |
| A & N Islands                                 | 0                    | 386   | 129   | 113  | 147  | 169  | 56   | 0            | 1000  | 15                                               | 16     |
| Chandigarh                                    | 135                  | 340   | 397   | 10   | 50   | 0    | 69   | 0            | 1000  | 174                                              | 55     |
| Dadra & N. Haveli                             | 0                    | 379   | 360   | 261  | 0    | 0    | 0    | 0            | 1000  | 1                                                | 7      |
| Daman & Diu                                   | 59                   | 74    | 0     | 866  | 0    | 0    | 0    | 0            | 1000  | 3                                                | 4      |
| Lakshadweep                                   | 0                    | 0     | 0     | 0    | 0    | 0    | 1000 | 0            | 1000  | 1                                                | 2      |
| Pondicherry                                   | 143                  | 425   | 228   | 67   | 37   | 75   | 26   | 0            | 1000  | 99                                               | 22     |
| ONES                                          | 28                   | 288   | 199   | 119  | 122  | 125  | 108  | 11           | 1000  | 284                                              | 208    |
| GUTs                                          | 129                  | 368   | 321   | 44   | 49   | 34   | 55   | 0            | 1000  | 294                                              | 106    |
| all-India                                     | 83                   | 396   | 256   | 94   | 70   | 42   | 44   | 15           | 1000  | 43733                                            | 3512   |
| estd. no. of eco. indep.<br>aged persons (00) | 3634                 | 17324 | 11174 | 4111 | 3069 | 1853 | 1915 | 653          | 43733 | X                                                | X      |
| sample eco. indep. aged<br>persons            | 269                  | 1302  | 916   | 354  | 256  | 171  | 181  | 63           | 3512  | X                                                | X      |

Table (12): Per 1000 distribution of fully economically independent aged persons by number of dependants for each sex and State/UT

| Urban<br>state/ut | number of dependants |     |      |     |     |     |     |              |       | Females<br>no. of eco. independent<br>aged persons |        |
|-------------------|----------------------|-----|------|-----|-----|-----|-----|--------------|-------|----------------------------------------------------|--------|
|                   | 0                    | 1   | 2    | 3   | 4   | 5   | 6-8 | 9 &<br>above | total | estd.<br>(00)                                      | sample |
|                   | (1)                  | (2) | (3)  | (4) | (5) | (6) | (7) | (8)          | (9)   | (10)                                               | (11)   |
| Andhra Pradesh    | 285                  | 138 | 545  | 7   | 0   | 23  | 2   | 0            | 1000  | 1518                                               | 80     |
| Arunachal Pradesh | 0                    | 194 | 581  | 226 | 0   | 0   | 0   | 0            | 1000  | 1                                                  | 5      |
| Assam             | 0                    | 301 | 309  | 120 | 271 | 0   | 0   | 0            | 1000  | 122                                                | 13     |
| Bihar             | 193                  | 351 | 239  | 13  | 0   | 0   | 182 | 22           | 1000  | 287                                                | 25     |
| Chhattisgarh      | 297                  | 133 | 440  | 0   | 0   | 130 | 0   | 0            | 1000  | 177                                                | 16     |
| Delhi             | 157                  | 304 | 470  | 53  | 8   | 0   | 8   | 0            | 1000  | 369                                                | 36     |
| Goa               | 600                  | 0   | 0    | 400 | 0   | 0   | 0   | 0            | 1000  | 9                                                  | 2      |
| Gujarat           | 445                  | 81  | 361  | 90  | 23  | 0   | 0   | 0            | 1000  | 595                                                | 38     |
| Haryana           | 287                  | 107 | 606  | 0   | 0   | 0   | 0   | 0            | 1000  | 299                                                | 20     |
| Himachal Pradesh  | 578                  | 154 | 268  | 0   | 0   | 0   | 0   | 0            | 1000  | 47                                                 | 13     |
| Jammu & Kashmir   | 523                  | 146 | 252  | 34  | 0   | 0   | 0   | 45           | 1000  | 35                                                 | 16     |
| Jharkhand         | 42                   | 258 | 590  | 87  | 0   | 23  | 0   | 0            | 1000  | 160                                                | 14     |
| Karnataka         | 290                  | 184 | 404  | 27  | 95  | 0   | 0   | 0            | 1000  | 563                                                | 51     |
| Kerala            | 336                  | 135 | 486  | 12  | 19  | 0   | 0   | 12           | 1000  | 884                                                | 66     |
| Madhya Pradesh    | 437                  | 58  | 479  | 25  | 2   | 0   | 0   | 0            | 1000  | 806                                                | 62     |
| Maharashtra       | 463                  | 109 | 385  | 14  | 20  | 3   | 5   | 0            | 1000  | 2539                                               | 118    |
| Manipur           | 60                   | 205 | 516  | 166 | 0   | 53  | 0   | 0            | 1000  | 15                                                 | 12     |
| Meghalaya         | 74                   | 53  | 873  | 0   | 0   | 0   | 0   | 0            | 1000  | 11                                                 | 11     |
| Mizoram           | 0                    | 265 | 312  | 129 | 131 | 22  | 140 | 0            | 1000  | 11                                                 | 20     |
| Nagaland          | 0                    | 0   | 898  | 0   | 0   | 102 | 0   | 0            | 1000  | 3                                                  | 2      |
| Orissa            | 70                   | 343 | 571  | 0   | 16  | 0   | 0   | 0            | 1000  | 73                                                 | 8      |
| Punjab            | 279                  | 197 | 323  | 0   | 201 | 0   | 0   | 0            | 1000  | 285                                                | 23     |
| Rajasthan         | 518                  | 111 | 179  | 0   | 121 | 0   | 71  | 0            | 1000  | 396                                                | 30     |
| Sikkim            | 0                    | 0   | 1000 | 0   | 0   | 0   | 0   | 0            | 1000  | 3                                                  | 4      |
| Tamil Nadu        | 547                  | 127 | 261  | 46  | 6   | 14  | 0   | 0            | 1000  | 1730                                               | 108    |
| Tripura           | 203                  | 215 | 528  | 55  | 0   | 0   | 0   | 0            | 1000  | 33                                                 | 10     |
| Uttaranchal       | 98                   | 180 | 232  | 0   | 490 | 0   | 0   | 0            | 1000  | 129                                                | 10     |
| Uttar Pradesh     | 44                   | 193 | 556  | 49  | 119 | 0   | 37  | 3            | 1000  | 1306                                               | 87     |
| West Bengal       | 281                  | 159 | 417  | 91  | 4   | 5   | 44  | 0            | 1000  | 1525                                               | 78     |

Continued

Table (12): Per 1000 distribution of fully economically independent aged persons by number of dependants for each sex and State/UT

| Urban<br>state/ut                             | number of dependants |      |      |     |     |     |      |              |       | Females<br>no. of eco. independent<br>aged persons |        |
|-----------------------------------------------|----------------------|------|------|-----|-----|-----|------|--------------|-------|----------------------------------------------------|--------|
|                                               | 0                    | 1    | 2    | 3   | 4   | 5   | 6-8  | 9 &<br>above | total | estd.<br>(00)                                      | sample |
|                                               | (2)                  | (3)  | (4)  | (5) | (6) | (7) | (8)  | (9)          | (10)  | (11)                                               | (12)   |
| A & N Islands                                 | 0                    | 156  | 511  | 111 | 0   | 222 | 0    | 0            | 1000  | 3                                                  | 7      |
| Chandigarh                                    | 309                  | 157  | 485  | 0   | 49  | 0   | 0    | 0            | 1000  | 59                                                 | 27     |
| Dadra & N. Haveli                             | 0                    | 0    | 0    | 0   | 0   | 0   | 0    | 0            | 0     | 0                                                  | 0      |
| Daman & Diu                                   | 1000                 | 0    | 0    | 0   | 0   | 0   | 0    | 0            | 1000  | 1                                                  | 2      |
| Lakshadweep                                   | 0                    | 0    | 0    | 0   | 0   | 0   | 1000 | 0            | 1000  | 1                                                  | 1      |
| Pondicherry                                   | 616                  | 0    | 384  | 0   | 0   | 0   | 0    | 0            | 1000  | 38                                                 | 7      |
| ONES                                          | 110                  | 181  | 576  | 77  | 19  | 18  | 20   | 0            | 1000  | 77                                                 | 64     |
| GUTs                                          | 419                  | 96   | 440  | 3   | 28  | 6   | 7    | 0            | 1000  | 102                                                | 44     |
| all-India                                     | 341                  | 146  | 417  | 35  | 37  | 7   | 15   | 2            | 1000  | 14033                                              | 1022   |
| estd. no. of eco. indep.<br>aged persons (00) | 4782                 | 2049 | 5852 | 492 | 517 | 103 | 217  | 22           | 14033 | X                                                  | X      |
| sample eco. indep. aged<br>persons            | 320                  | 176  | 415  | 43  | 33  | 12  | 17   | 6            | 1022  | X                                                  | X      |

Table (12): Per 1000 distribution of fully economically independent aged persons by number of dependants for each sex and State/UT

| Urban<br>state/ut | number of dependants |     |     |     |     |     |     |              |       | Persons                                 |        |
|-------------------|----------------------|-----|-----|-----|-----|-----|-----|--------------|-------|-----------------------------------------|--------|
|                   | 0                    | 1   | 2   | 3   | 4   | 5   | 6-8 | 9 &<br>above | total | no. of eco. independent<br>aged persons |        |
|                   |                      |     |     |     |     |     |     |              |       | estd. (00)                              | sample |
| (1)               | (2)                  | (3) | (4) | (5) | (6) | (7) | (8) | (9)          | (10)  | (11)                                    | (12)   |
| Andhra Pradesh    | 139                  | 381 | 318 | 42  | 53  | 33  | 33  | 1            | 1000  | 4529                                    | 292    |
| Arunachal Pradesh | 0                    | 340 | 502 | 54  | 39  | 49  | 0   | 15           | 1000  | 4                                       | 17     |
| Assam             | 0                    | 248 | 265 | 283 | 158 | 40  | 5   | 0            | 1000  | 486                                     | 78     |
| Bihar             | 94                   | 242 | 209 | 68  | 73  | 46  | 161 | 108          | 1000  | 1368                                    | 117    |
| Chhattisgarh      | 201                  | 124 | 396 | 116 | 46  | 98  | 19  | 0            | 1000  | 554                                     | 52     |
| Delhi             | 89                   | 492 | 330 | 30  | 50  | 2   | 5   | 1            | 1000  | 1725                                    | 164    |
| Goa               | 59                   | 292 | 61  | 392 | 153 | 43  | 0   | 0            | 1000  | 95                                      | 16     |
| Gujarat           | 157                  | 359 | 302 | 57  | 67  | 20  | 25  | 13           | 1000  | 3005                                    | 199    |
| Haryana           | 121                  | 382 | 385 | 5   | 39  | 43  | 9   | 17           | 1000  | 940                                     | 81     |
| Himachal Pradesh  | 249                  | 350 | 314 | 79  | 8   | 0   | 0   | 0            | 1000  | 148                                     | 47     |
| Jammu & Kashmir   | 168                  | 273 | 256 | 109 | 89  | 89  | 0   | 15           | 1000  | 290                                     | 86     |
| Jharkhand         | 15                   | 209 | 413 | 103 | 62  | 53  | 92  | 54           | 1000  | 844                                     | 106    |
| Karnataka         | 129                  | 335 | 259 | 125 | 57  | 43  | 30  | 22           | 1000  | 2757                                    | 247    |
| Kerala            | 161                  | 349 | 351 | 58  | 55  | 9   | 12  | 4            | 1000  | 2751                                    | 212    |
| Madhya Pradesh    | 174                  | 398 | 227 | 45  | 59  | 47  | 25  | 25           | 1000  | 3427                                    | 264    |
| Maharashtra       | 200                  | 385 | 299 | 70  | 19  | 10  | 17  | 0            | 1000  | 8928                                    | 451    |
| Manipur           | 25                   | 157 | 235 | 120 | 153 | 205 | 75  | 29           | 1000  | 87                                      | 53     |
| Meghalaya         | 17                   | 438 | 423 | 25  | 58  | 39  | 0   | 0            | 1000  | 50                                      | 39     |
| Mizoram           | 0                    | 243 | 280 | 139 | 103 | 29  | 199 | 8            | 1000  | 54                                      | 93     |
| Nagaland          | 0                    | 126 | 173 | 195 | 83  | 175 | 248 | 0            | 1000  | 53                                      | 17     |
| Orissa            | 9                    | 363 | 236 | 98  | 123 | 141 | 25  | 5            | 1000  | 849                                     | 80     |
| Punjab            | 188                  | 354 | 250 | 124 | 58  | 22  | 5   | 0            | 1000  | 1557                                    | 102    |
| Rajasthan         | 242                  | 304 | 175 | 45  | 101 | 49  | 83  | 1            | 1000  | 2059                                    | 178    |
| Sikkim            | 0                    | 204 | 447 | 207 | 0   | 142 | 0   | 0            | 1000  | 11                                      | 15     |
| Tamil Nadu        | 254                  | 303 | 267 | 91  | 34  | 31  | 17  | 3            | 1000  | 6049                                    | 409    |
| Tripura           | 132                  | 363 | 274 | 75  | 96  | 43  | 17  | 0            | 1000  | 102                                     | 38     |
| Uttaranchal       | 47                   | 422 | 263 | 0   | 116 | 20  | 65  | 67           | 1000  | 591                                     | 48     |
| Uttar Pradesh     | 19                   | 316 | 325 | 84  | 103 | 52  | 77  | 24           | 1000  | 6789                                    | 465    |
| West Bengal       | 129                  | 261 | 323 | 123 | 84  | 33  | 43  | 5            | 1000  | 7270                                    | 418    |

Continued

Table (12): Per 1000 distribution of fully economically independent aged persons by number of dependants for each sex and State/UT

| Urban<br>state/ut                          | number of dependants |       |       |      |      |      |      |           |       | Persons                              |        |
|--------------------------------------------|----------------------|-------|-------|------|------|------|------|-----------|-------|--------------------------------------|--------|
|                                            | 0                    | 1     | 2     | 3    | 4    | 5    | 6-8  | 9 & above | total | no. of eco. independent aged persons |        |
|                                            | (2)                  | (3)   | (4)   | (5)  | (6)  | (7)  | (8)  | (9)       | (10)  | estd. (00)                           | sample |
| (1)                                        | (2)                  | (3)   | (4)   | (5)  | (6)  | (7)  | (8)  | (9)       | (10)  | (11)                                 | (12)   |
| A & N Islands                              | 0                    | 351   | 187   | 112  | 124  | 177  | 48   | 0         | 1000  | 18                                   | 23     |
| Chandigarh                                 | 179                  | 294   | 419   | 8    | 49   | 0    | 51   | 0         | 1000  | 233                                  | 82     |
| Dadra & N. Haveli                          | 0                    | 379   | 360   | 261  | 0    | 0    | 0    | 0         | 1000  | 1                                    | 7      |
| Daman & Diu                                | 294                  | 56    | 0     | 651  | 0    | 0    | 0    | 0         | 1000  | 4                                    | 6      |
| Lakshadweep                                | 0                    | 0     | 0     | 0    | 0    | 0    | 1000 | 0         | 1000  | 1                                    | 3      |
| Pondicherry                                | 274                  | 307   | 271   | 48   | 27   | 54   | 19   | 0         | 1000  | 137                                  | 29     |
| ONES                                       | 46                   | 265   | 279   | 110  | 100  | 102  | 89   | 8         | 1000  | 361                                  | 272    |
| GUTs                                       | 203                  | 298   | 351   | 33   | 44   | 27   | 43   | 0         | 1000  | 395                                  | 150    |
| all-India                                  | 146                  | 335   | 295   | 80   | 62   | 34   | 37   | 12        | 1000  | 57766                                | 4534   |
| estd. no. of eco. indep. aged persons (00) | 8417                 | 19373 | 17027 | 4603 | 3585 | 1955 | 2132 | 674       | 57766 | X                                    | X      |
| sample eco. indep. aged persons            | 589                  | 1478  | 1331  | 397  | 289  | 183  | 198  | 69        | 4534  | X                                    | X      |

Table (12): Per 1000 distribution of fully economically independent aged persons by number of dependants for each sex and State/UT

| Rural + Urban     |                      |     |     |     |     |     |     |           |       | Males                                |        |
|-------------------|----------------------|-----|-----|-----|-----|-----|-----|-----------|-------|--------------------------------------|--------|
| state/ut          | number of dependants |     |     |     |     |     |     |           |       | no. of eco. independent aged persons |        |
|                   | 0                    | 1   | 2   | 3   | 4   | 5   | 6-8 | 9 & above | total | estd. (00)                           | sample |
| (1)               | (2)                  | (3) | (4) | (5) | (6) | (7) | (8) | (9)       | (10)  | (11)                                 | (12)   |
| Andhra Pradesh    | 88                   | 436 | 232 | 68  | 85  | 38  | 39  | 14        | 1000  | 12113                                | 519    |
| Arunachal Pradesh | 0                    | 103 | 357 | 192 | 100 | 119 | 89  | 40        | 1000  | 79                                   | 63     |
| Assam             | 23                   | 230 | 175 | 148 | 136 | 109 | 138 | 41        | 1000  | 3069                                 | 277    |
| Bihar             | 44                   | 224 | 256 | 110 | 100 | 57  | 146 | 62        | 1000  | 12055                                | 631    |
| Chhattisgarh      | 113                  | 205 | 265 | 99  | 102 | 90  | 90  | 36        | 1000  | 2855                                 | 146    |
| Delhi             | 93                   | 524 | 297 | 22  | 56  | 3   | 4   | 2         | 1000  | 1493                                 | 134    |
| Goa               | 240                  | 512 | 96  | 115 | 29  | 8   | 0   | 0         | 1000  | 508                                  | 27     |
| Gujarat           | 176                  | 390 | 201 | 82  | 54  | 23  | 58  | 15        | 1000  | 7571                                 | 338    |
| Haryana           | 55                   | 335 | 271 | 42  | 115 | 56  | 59  | 66        | 1000  | 2746                                 | 153    |
| Himachal Pradesh  | 76                   | 373 | 273 | 77  | 58  | 25  | 110 | 8         | 1000  | 1489                                 | 218    |
| Jammu & Kashmir   | 102                  | 314 | 280 | 71  | 118 | 69  | 46  | 2         | 1000  | 1723                                 | 216    |
| Jharkhand         | 29                   | 293 | 251 | 69  | 72  | 92  | 148 | 45        | 1000  | 4217                                 | 292    |
| Karnataka         | 93                   | 354 | 174 | 136 | 94  | 63  | 58  | 29        | 1000  | 8496                                 | 430    |
| Kerala            | 39                   | 450 | 316 | 81  | 54  | 27  | 28  | 5         | 1000  | 6087                                 | 336    |
| Madhya Pradesh    | 108                  | 391 | 141 | 61  | 75  | 75  | 93  | 56        | 1000  | 11062                                | 515    |
| Maharashtra       | 90                   | 423 | 288 | 89  | 26  | 45  | 36  | 4         | 1000  | 17821                                | 672    |
| Manipur           | 7                    | 164 | 261 | 93  | 171 | 179 | 100 | 24        | 1000  | 183                                  | 98     |
| Meghalaya         | 15                   | 185 | 408 | 96  | 129 | 18  | 150 | 0         | 1000  | 307                                  | 76     |
| Mizoram           | 0                    | 265 | 201 | 169 | 78  | 41  | 223 | 22        | 1000  | 111                                  | 127    |
| Nagaland          | 0                    | 148 | 264 | 186 | 158 | 87  | 157 | 0         | 1000  | 103                                  | 43     |
| Orissa            | 47                   | 343 | 253 | 101 | 86  | 81  | 81  | 7         | 1000  | 6749                                 | 296    |
| Punjab            | 70                   | 315 | 349 | 89  | 73  | 44  | 48  | 11        | 1000  | 4385                                 | 198    |
| Rajasthan         | 102                  | 385 | 139 | 81  | 96  | 47  | 76  | 74        | 1000  | 7389                                 | 407    |
| Sikkim            | 29                   | 121 | 321 | 245 | 68  | 94  | 117 | 5         | 1000  | 79                                   | 72     |
| Tamil Nadu        | 94                   | 404 | 253 | 119 | 51  | 43  | 31  | 4         | 1000  | 12572                                | 564    |
| Tripura           | 31                   | 209 | 252 | 183 | 195 | 60  | 43  | 26        | 1000  | 492                                  | 105    |
| Uttaranchal       | 60                   | 276 | 170 | 85  | 116 | 181 | 90  | 23        | 1000  | 2107                                 | 111    |
| Uttar Pradesh     | 31                   | 276 | 244 | 92  | 89  | 83  | 114 | 70        | 1000  | 31087                                | 1486   |
| West Bengal       | 59                   | 257 | 255 | 142 | 127 | 49  | 86  | 25        | 1000  | 14130                                | 642    |

Continued

Table (12): Per 1000 distribution of fully economically independent aged persons by number of dependants for each sex and State/UT

| Rural + Urban<br>state/ut                     | number of dependants |       |       |       |       |       |       |              |        | Males<br>no. of eco. independent<br>aged persons |        |
|-----------------------------------------------|----------------------|-------|-------|-------|-------|-------|-------|--------------|--------|--------------------------------------------------|--------|
|                                               | 0                    | 1     | 2     | 3     | 4     | 5     | 6-8   | 9 &<br>above | total  | estd. (00)                                       | sample |
|                                               | (2)                  | (3)   | (4)   | (5)   | (6)   | (7)   | (8)   | (9)          | (10)   | (11)                                             | (12)   |
| A & N Islands                                 | 0                    | 245   | 334   | 144   | 225   | 41    | 11    | 0            | 1000   | 80                                               | 44     |
| Chandigarh                                    | 135                  | 355   | 383   | 12    | 49    | 0     | 66    | 0            | 1000   | 181                                              | 71     |
| Dadra & N. Haveli                             | 0                    | 246   | 730   | 24    | 0     | 0     | 0     | 0            | 1000   | 14                                               | 10     |
| Daman & Diu                                   | 80                   | 117   | 0     | 803   | 0     | 0     | 0     | 0            | 1000   | 6                                                | 8      |
| Lakshadweep                                   | 20                   | 60    | 0     | 0     | 160   | 51    | 709   | 0            | 1000   | 3                                                | 8      |
| Pondicherry                                   | 159                  | 445   | 107   | 113   | 17    | 35    | 60    | 65           | 1000   | 211                                              | 34     |
| ONES                                          | 17                   | 186   | 295   | 154   | 151   | 72    | 105   | 17           | 1000   | 1353                                             | 584    |
| GUTs                                          | 118                  | 368   | 261   | 86    | 62    | 22    | 55    | 28           | 1000   | 495                                              | 175    |
| all-India                                     | 72                   | 340   | 239   | 96    | 81    | 60    | 78    | 34           | 1000   | 173573                                           | 9367   |
| estd. no. of eco. indep.<br>aged persons (00) | 12536                | 58976 | 41538 | 16644 | 14076 | 10333 | 13567 | 5903         | 173573 | X                                                | X      |
| sample eco. indep. aged<br>persons            | 630                  | 3117  | 2295  | 941   | 759   | 564   | 721   | 340          | 9367   | X                                                | X      |



Table (12): Per 1000 distribution of fully economically independent aged persons by number of dependants for each sex and State/UT

| Rural + Urban     |                      |     |     |     |     |     |     |           |       | Females                              |        |
|-------------------|----------------------|-----|-----|-----|-----|-----|-----|-----------|-------|--------------------------------------|--------|
| state/ut          | number of dependants |     |     |     |     |     |     |           |       | no. of eco. independent aged persons |        |
|                   | 0                    | 1   | 2   | 3   | 4   | 5   | 6-8 | 9 & above | total | estd. (00)                           | sample |
| (1)               | (2)                  | (3) | (4) | (5) | (6) | (7) | (8) | (9)       | (10)  | (12)                                 | (13)   |
| Andhra Pradesh    | 338                  | 186 | 426 | 3   | 24  | 22  | 1   | 0         | 1000  | 4492                                 | 169    |
| Arunachal Pradesh | 0                    | 291 | 189 | 387 | 0   | 128 | 0   | 5         | 1000  | 23                                   | 16     |
| Assam             | 168                  | 267 | 378 | 117 | 70  | 0   | 0   | 0         | 1000  | 470                                  | 37     |
| Bihar             | 199                  | 134 | 454 | 85  | 7   | 2   | 105 | 15        | 1000  | 2840                                 | 148    |
| Chhattisgarh      | 172                  | 202 | 419 | 26  | 20  | 47  | 90  | 24        | 1000  | 1926                                 | 91     |
| Delhi             | 157                  | 304 | 470 | 53  | 8   | 0   | 8   | 0         | 1000  | 369                                  | 36     |
| Goa               | 489                  | 33  | 457 | 22  | 0   | 0   | 0   | 0         | 1000  | 169                                  | 10     |
| Gujarat           | 600                  | 192 | 166 | 28  | 7   | 0   | 0   | 8         | 1000  | 1937                                 | 88     |
| Haryana           | 393                  | 55  | 497 | 0   | 41  | 0   | 0   | 14        | 1000  | 997                                  | 49     |
| Himachal Pradesh  | 383                  | 50  | 513 | 31  | 17  | 0   | 6   | 0         | 1000  | 513                                  | 76     |
| Jammu & Kashmir   | 644                  | 61  | 149 | 6   | 117 | 14  | 0   | 8         | 1000  | 202                                  | 34     |
| Jharkhand         | 188                  | 152 | 330 | 26  | 55  | 20  | 0   | 228       | 1000  | 899                                  | 43     |
| Karnataka         | 505                  | 129 | 245 | 44  | 45  | 25  | 7   | 0         | 1000  | 2176                                 | 106    |
| Kerala            | 312                  | 135 | 496 | 42  | 12  | 0   | 0   | 4         | 1000  | 2421                                 | 128    |
| Madhya Pradesh    | 471                  | 143 | 314 | 26  | 30  | 0   | 16  | 0         | 1000  | 3045                                 | 141    |
| Maharashtra       | 369                  | 139 | 407 | 52  | 16  | 2   | 15  | 0         | 1000  | 6995                                 | 230    |
| Manipur           | 59                   | 222 | 334 | 95  | 150 | 140 | 0   | 0         | 1000  | 39                                   | 26     |
| Meghalaya         | 52                   | 162 | 611 | 68  | 0   | 0   | 106 | 0         | 1000  | 87                                   | 34     |
| Mizoram           | 0                    | 350 | 235 | 146 | 71  | 12  | 186 | 0         | 1000  | 21                                   | 26     |
| Nagaland          | 0                    | 0   | 957 | 0   | 16  | 27  | 0   | 0         | 1000  | 12                                   | 7      |
| Orissa            | 110                  | 300 | 511 | 12  | 1   | 65  | 0   | 0         | 1000  | 982                                  | 44     |
| Punjab            | 223                  | 141 | 572 | 0   | 61  | 0   | 3   | 0         | 1000  | 939                                  | 46     |
| Rajasthan         | 426                  | 187 | 164 | 100 | 90  | 11  | 23  | 0         | 1000  | 1624                                 | 78     |
| Sikkim            | 0                    | 48  | 733 | 73  | 0   | 0   | 146 | 0         | 1000  | 15                                   | 14     |
| Tamil Nadu        | 490                  | 231 | 229 | 30  | 2   | 17  | 2   | 0         | 1000  | 5039                                 | 196    |
| Tripura           | 266                  | 293 | 422 | 19  | 0   | 0   | 0   | 0         | 1000  | 95                                   | 20     |
| Uttaranchal       | 306                  | 126 | 359 | 98  | 100 | 2   | 10  | 0         | 1000  | 897                                  | 47     |
| Uttar Pradesh     | 116                  | 148 | 480 | 74  | 84  | 21  | 41  | 36        | 1000  | 6563                                 | 300    |
| West Bengal       | 262                  | 203 | 430 | 71  | 2   | 7   | 25  | 0         | 1000  | 2705                                 | 126    |

Continued

Table (12): Per 1000 distribution of fully economically independent aged persons by number of dependants for each sex and State/UT

| Rural + Urban<br>state/ut                     | number of dependants |      |       |      |      |     |      |              |       | Females<br>no. of eco. independent<br>aged persons |        |
|-----------------------------------------------|----------------------|------|-------|------|------|-----|------|--------------|-------|----------------------------------------------------|--------|
|                                               | 0                    | 1    | 2     | 3    | 4    | 5   | 6-8  | 9 &<br>above | total | estd. (00)                                         | sample |
|                                               | (2)                  | (3)  | (4)   | (5)  | (6)  | (7) | (8)  | (9)          | (10)  | (12)                                               | (13)   |
| (1)                                           | (2)                  | (3)  | (4)   | (5)  | (6)  | (7) | (8)  | (9)          | (10)  | (12)                                               | (13)   |
| A & N Islands                                 | 0                    | 221  | 619   | 14   | 119  | 27  | 0    | 0            | 1000  | 23                                                 | 13     |
| Chandigarh                                    | 303                  | 182  | 468   | 0    | 47   | 0   | 0    | 0            | 1000  | 61                                                 | 29     |
| Dadra & N. Haveli                             | 331                  | 669  | 0     | 0    | 0    | 0   | 0    | 0            | 1000  | 5                                                  | 2      |
| Daman & Diu                                   | 1000                 | 0    | 0     | 0    | 0    | 0   | 0    | 0            | 1000  | 4                                                  | 5      |
| Lakshadweep                                   | 233                  | 0    | 184   | 0    | 0    | 0   | 312  | 270          | 1000  | 2                                                  | 5      |
| Pondicherry                                   | 545                  | 314  | 141   | 0    | 0    | 0   | 0    | 0            | 1000  | 103                                                | 13     |
| ONES                                          | 110                  | 224  | 473   | 84   | 26   | 31  | 52   | 0            | 1000  | 293                                                | 143    |
| GUTs                                          | 409                  | 260  | 291   | 2    | 28   | 3   | 4    | 3            | 1000  | 199                                                | 67     |
| all-India                                     | 326                  | 167  | 383   | 46   | 32   | 13  | 22   | 12           | 1000  | 48692                                              | 2433   |
| estd. no. of eco. indep.<br>aged persons (00) | 15887                | 8110 | 18668 | 2229 | 1543 | 621 | 1058 | 575          | 48692 | X                                                  | X      |
| sample eco. indep. aged<br>persons            | 736                  | 421  | 962   | 112  | 82   | 37  | 51   | 32           | 2433  | X                                                  | X      |

Table (12): Per 1000 distribution of fully economically independent aged persons by number of dependants for each sex and State/UT

| Rural + Urban     |                      |     |     |     |     |     |     |           |       | Persons                              |        |
|-------------------|----------------------|-----|-----|-----|-----|-----|-----|-----------|-------|--------------------------------------|--------|
| state/ut          | number of dependants |     |     |     |     |     |     |           |       | no. of eco. independent aged persons |        |
|                   | 0                    | 1   | 2   | 3   | 4   | 5   | 6-8 | 9 & above | total | estd. (00)                           | sample |
| (1)               | (2)                  | (3) | (4) | (5) | (6) | (7) | (8) | (9)       | (10)  | (11)                                 | (12)   |
| Andhra Pradesh    | 156                  | 368 | 285 | 51  | 68  | 34  | 29  | 10        | 1000  | 16606                                | 688    |
| Arunachal Pradesh | 0                    | 145 | 319 | 236 | 77  | 121 | 69  | 32        | 1000  | 102                                  | 79     |
| Assam             | 43                   | 235 | 202 | 144 | 127 | 94  | 120 | 35        | 1000  | 3538                                 | 314    |
| Bihar             | 74                   | 207 | 294 | 105 | 83  | 47  | 138 | 53        | 1000  | 14895                                | 779    |
| Chhattisgarh      | 137                  | 204 | 327 | 70  | 69  | 73  | 90  | 31        | 1000  | 4780                                 | 237    |
| Delhi             | 106                  | 480 | 331 | 28  | 47  | 2   | 5   | 1         | 1000  | 1862                                 | 170    |
| Goa               | 302                  | 392 | 186 | 92  | 22  | 6   | 0   | 0         | 1000  | 677                                  | 37     |
| Gujarat           | 262                  | 350 | 194 | 71  | 44  | 18  | 46  | 14        | 1000  | 9508                                 | 426    |
| Haryana           | 145                  | 261 | 331 | 31  | 96  | 41  | 44  | 52        | 1000  | 3744                                 | 202    |
| Himachal Pradesh  | 155                  | 290 | 335 | 65  | 48  | 19  | 83  | 6         | 1000  | 2002                                 | 294    |
| Jammu & Kashmir   | 158                  | 287 | 266 | 64  | 118 | 63  | 41  | 2         | 1000  | 1925                                 | 250    |
| Jharkhand         | 57                   | 268 | 265 | 62  | 69  | 79  | 122 | 77        | 1000  | 5117                                 | 335    |
| Karnataka         | 177                  | 308 | 188 | 117 | 84  | 55  | 47  | 23        | 1000  | 10672                                | 536    |
| Kerala            | 117                  | 361 | 367 | 70  | 42  | 19  | 20  | 5         | 1000  | 8508                                 | 464    |
| Madhya Pradesh    | 186                  | 338 | 179 | 54  | 66  | 59  | 76  | 44        | 1000  | 14107                                | 656    |
| Maharashtra       | 169                  | 343 | 321 | 78  | 23  | 33  | 30  | 3         | 1000  | 24816                                | 902    |
| Manipur           | 17                   | 175 | 274 | 93  | 168 | 172 | 82  | 20        | 1000  | 222                                  | 124    |
| Meghalaya         | 23                   | 180 | 453 | 90  | 100 | 14  | 140 | 0         | 1000  | 394                                  | 110    |
| Mizoram           | 0                    | 279 | 206 | 165 | 77  | 36  | 218 | 19        | 1000  | 131                                  | 153    |
| Nagaland          | 0                    | 133 | 336 | 167 | 143 | 81  | 140 | 0         | 1000  | 115                                  | 50     |
| Orissa            | 55                   | 338 | 286 | 90  | 75  | 79  | 71  | 6         | 1000  | 7731                                 | 340    |
| Punjab            | 97                   | 284 | 388 | 74  | 71  | 37  | 40  | 9         | 1000  | 5324                                 | 244    |
| Rajasthan         | 160                  | 349 | 143 | 85  | 94  | 41  | 67  | 61        | 1000  | 9013                                 | 485    |
| Sikkim            | 25                   | 109 | 385 | 218 | 57  | 79  | 122 | 4         | 1000  | 93                                   | 86     |
| Tamil Nadu        | 207                  | 355 | 246 | 94  | 37  | 36  | 23  | 3         | 1000  | 17611                                | 760    |
| Tripura           | 69                   | 223 | 280 | 156 | 163 | 50  | 36  | 22        | 1000  | 588                                  | 125    |
| Uttaranchal       | 133                  | 231 | 227 | 89  | 111 | 127 | 66  | 16        | 1000  | 3004                                 | 158    |
| Uttar Pradesh     | 46                   | 254 | 285 | 89  | 88  | 72  | 102 | 64        | 1000  | 37650                                | 1786   |
| West Bengal       | 92                   | 249 | 283 | 131 | 107 | 42  | 76  | 21        | 1000  | 16835                                | 768    |

Continued

Table (12): Per 1000 distribution of fully economically independent aged persons by number of dependants for each sex and State/UT

| state/ut                                   | number of dependants |       |       |       |       |       |       |           |        | Persons                              |        |
|--------------------------------------------|----------------------|-------|-------|-------|-------|-------|-------|-----------|--------|--------------------------------------|--------|
|                                            | 0                    | 1     | 2     | 3     | 4     | 5     | 6-8   | 9 & above | total  | no. of eco. independent aged persons |        |
|                                            | (2)                  | (3)   | (4)   | (5)   | (6)   | (7)   | (8)   | (9)       | (10)   | estd. (00)                           | sample |
| (1)                                        | (2)                  | (3)   | (4)   | (5)   | (6)   | (7)   | (8)   | (9)       | (10)   | (11)                                 | (12)   |
| A & N Islands                              | 0                    | 240   | 397   | 115   | 202   | 38    | 8     | 0         | 1000   | 103                                  | 57     |
| Chandigarh                                 | 177                  | 312   | 405   | 9     | 48    | 0     | 49    | 0         | 1000   | 243                                  | 100    |
| Dadra & N. Haveli                          | 83                   | 352   | 548   | 18    | 0     | 0     | 0     | 0         | 1000   | 19                                   | 12     |
| Daman & Diu                                | 476                  | 67    | 0     | 458   | 0     | 0     | 0     | 0         | 1000   | 10                                   | 13     |
| Lakshadweep                                | 117                  | 33    | 84    | 0     | 87    | 28    | 529   | 122       | 1000   | 5                                    | 13     |
| Pondicherry                                | 286                  | 402   | 118   | 76    | 12    | 24    | 40    | 44        | 1000   | 314                                  | 47     |
| ONES                                       | 34                   | 193   | 327   | 142   | 129   | 65    | 96    | 14        | 1000   | 1646                                 | 727    |
| GUTs                                       | 201                  | 337   | 269   | 61    | 53    | 17    | 41    | 21        | 1000   | 694                                  | 242    |
| all-India                                  | 128                  | 302   | 271   | 85    | 70    | 49    | 66    | 29        | 1000   | 222264                               | 11800  |
| estd. no. of eco. indep. aged persons (00) | 28423                | 67086 | 60206 | 18873 | 15619 | 10954 | 14626 | 6478      | 222264 | X                                    | X      |
| sample eco. indep. aged persons            | 1366                 | 3538  | 3257  | 1053  | 841   | 601   | 772   | 372       | 11800  | X                                    | X      |

Table (13): Per 1000 distribution of economically dependent aged persons by category of persons financially supporting the aged person for each sex

| state/ut                                 | persons supporting the aged person |              |                |        |        | no. of economically dependent aged persons |        |
|------------------------------------------|------------------------------------|--------------|----------------|--------|--------|--------------------------------------------|--------|
|                                          | spouse                             | own children | grand children | others | total  | estd. (00)                                 | sample |
|                                          | (2)                                | (3)          | (4)            | (5)    | (6)    | (7)                                        | (8)    |
| Andhra Pradesh                           | 102                                | 835          | 19             | 45     | 1000   | 9448                                       | 386    |
| Arunachal Pradesh                        | 48                                 | 865          | 3              | 84     | 1000   | 104                                        | 62     |
| Assam                                    | 13                                 | 948          | 23             | 16     | 1000   | 3175                                       | 245    |
| Bihar                                    | 85                                 | 853          | 24             | 38     | 1000   | 7609                                       | 360    |
| Chhattisgarh                             | 106                                | 713          | 35             | 147    | 1000   | 1981                                       | 92     |
| Delhi                                    | 50                                 | 808          | 6              | 136    | 1000   | 201                                        | 10     |
| Goa                                      | 0                                  | 1000         | 0              | 0      | 1000   | 84                                         | 6      |
| Gujarat                                  | 15                                 | 931          | 19             | 36     | 1000   | 5236                                       | 173    |
| Haryana                                  | 14                                 | 920          | 0              | 66     | 1000   | 3494                                       | 159    |
| Himachal Pradesh                         | 34                                 | 857          | 18             | 91     | 1000   | 965                                        | 156    |
| Jammu & Kashmir                          | 19                                 | 852          | 33             | 96     | 1000   | 727                                        | 79     |
| Jharkhand                                | 59                                 | 855          | 54             | 33     | 1000   | 2800                                       | 127    |
| Karnataka                                | 125                                | 788          | 26             | 61     | 1000   | 5333                                       | 193    |
| Kerala                                   | 79                                 | 856          | 8              | 56     | 1000   | 7425                                       | 314    |
| Madhya Pradesh                           | 51                                 | 829          | 57             | 62     | 1000   | 5892                                       | 226    |
| Maharashtra                              | 91                                 | 857          | 14             | 37     | 1000   | 11839                                      | 377    |
| Manipur                                  | 153                                | 752          | 67             | 29     | 1000   | 209                                        | 116    |
| Meghalaya                                | 38                                 | 962          | 0              | 0      | 1000   | 190                                        | 45     |
| Mizoram                                  | 218                                | 782          | 0              | 0      | 1000   | 42                                         | 28     |
| Nagaland                                 | 73                                 | 827          | 101            | 0      | 1000   | 53                                         | 26     |
| Orissa                                   | 131                                | 785          | 25             | 59     | 1000   | 7092                                       | 293    |
| Punjab                                   | 86                                 | 856          | 28             | 31     | 1000   | 3637                                       | 135    |
| Rajasthan                                | 29                                 | 855          | 34             | 82     | 1000   | 6387                                       | 291    |
| Sikkim                                   | 25                                 | 889          | 40             | 45     | 1000   | 44                                         | 48     |
| Tamil Nadu                               | 99                                 | 867          | 12             | 22     | 1000   | 8708                                       | 308    |
| Tripura                                  | 22                                 | 913          | 21             | 44     | 1000   | 484                                        | 91     |
| Uttaranchal                              | 99                                 | 838          | 44             | 19     | 1000   | 871                                        | 27     |
| Uttar Pradesh                            | 32                                 | 838          | 14             | 116    | 1000   | 16253                                      | 685    |
| West Bengal                              | 66                                 | 869          | 25             | 40     | 1000   | 9299                                       | 369    |
| A & N Islands                            | 357                                | 619          | 0              | 24     | 1000   | 12                                         | 6      |
| Chandigarh                               | 1000                               | 0            | 0              | 0      | 1000   | 0                                          | 1      |
| Dadra & N. Haveli                        | 0                                  | 854          | 0              | 146    | 1000   | 65                                         | 17     |
| Daman & Diu                              | 660                                | 340          | 0              | 0      | 1000   | 1                                          | 3      |
| Lakshadweep                              | 0                                  | 772          | 0              | 228    | 1000   | 5                                          | 10     |
| Pondicherry                              | 0                                  | 1000         | 0              | 0      | 1000   | 49                                         | 8      |
| ONES                                     | 61                                 | 877          | 28             | 34     | 1000   | 1126                                       | 416    |
| GUTs                                     | 39                                 | 878          | 0              | 83     | 1000   | 132                                        | 45     |
| all-India                                | 70                                 | 850          | 22             | 57     | 1000   | 119714                                     | 5472   |
| estd. no. of eco. dep. aged persons (00) | 8426                               | 101800       | 2630           | 6858   | 119714 | X                                          | X      |
| sample eco. dep. aged persons            | 372                                | 4650         | 129            | 321    | 5472   | X                                          | X      |

Table (13): Per 1000 distribution of economically dependent aged persons by category of persons financially supporting the aged person for each sex

| Rural                                    |                                    |              |                |        |        | Females                                    |        |
|------------------------------------------|------------------------------------|--------------|----------------|--------|--------|--------------------------------------------|--------|
| state/ut                                 | persons supporting the aged person |              |                |        |        | no. of economically dependent aged persons |        |
|                                          | spouse                             | own children | grand children | others | total  | estd. (00)                                 | sample |
| (1)                                      | (2)                                | (3)          | (4)            | (5)    | (6)    | (7)                                        | (8)    |
| Andhra Pradesh                           | 82                                 | 801          | 25             | 92     | 1000   | 16865                                      | 594    |
| Arunachal Pradesh                        | 34                                 | 871          | 2              | 93     | 1000   | 153                                        | 88     |
| Assam                                    | 63                                 | 872          | 19             | 46     | 1000   | 3700                                       | 281    |
| Bihar                                    | 230                                | 707          | 23             | 40     | 1000   | 12411                                      | 539    |
| Chhattisgarh                             | 131                                | 680          | 37             | 153    | 1000   | 4773                                       | 210    |
| Delhi                                    | 282                                | 580          | 53             | 85     | 1000   | 322                                        | 17     |
| Goa                                      | 412                                | 588          | 0              | 0      | 1000   | 455                                        | 24     |
| Gujarat                                  | 144                                | 785          | 34             | 37     | 1000   | 9051                                       | 319    |
| Haryana                                  | 169                                | 765          | 9              | 57     | 1000   | 4812                                       | 203    |
| Himachal Pradesh                         | 182                                | 750          | 27             | 41     | 1000   | 1999                                       | 275    |
| Jammu & Kashmir                          | 233                                | 728          | 29             | 11     | 1000   | 1378                                       | 151    |
| Jharkhand                                | 151                                | 766          | 65             | 19     | 1000   | 3612                                       | 197    |
| Karnataka                                | 89                                 | 795          | 36             | 80     | 1000   | 9165                                       | 346    |
| Kerala                                   | 88                                 | 831          | 26             | 55     | 1000   | 13254                                      | 576    |
| Madhya Pradesh                           | 216                                | 675          | 33             | 76     | 1000   | 12051                                      | 452    |
| Maharashtra                              | 138                                | 745          | 21             | 97     | 1000   | 19717                                      | 595    |
| Manipur                                  | 82                                 | 779          | 46             | 92     | 1000   | 217                                        | 124    |
| Meghalaya                                | 21                                 | 889          | 0              | 90     | 1000   | 334                                        | 69     |
| Mizoram                                  | 293                                | 665          | 0              | 42     | 1000   | 55                                         | 38     |
| Nagaland                                 | 153                                | 847          | 0              | 0      | 1000   | 30                                         | 19     |
| Orissa                                   | 152                                | 749          | 43             | 55     | 1000   | 10915                                      | 435    |
| Punjab                                   | 256                                | 702          | 40             | 2      | 1000   | 5849                                       | 215    |
| Rajasthan                                | 195                                | 728          | 46             | 31     | 1000   | 11768                                      | 534    |
| Sikkim                                   | 330                                | 536          | 72             | 62     | 1000   | 88                                         | 82     |
| Tamil Nadu                               | 109                                | 788          | 30             | 72     | 1000   | 13836                                      | 461    |
| Tripura                                  | 96                                 | 796          | 73             | 35     | 1000   | 602                                        | 124    |
| Uttaranchal                              | 205                                | 754          | 27             | 14     | 1000   | 1401                                       | 51     |
| Uttar Pradesh                            | 236                                | 672          | 26             | 66     | 1000   | 35057                                      | 1403   |
| West Bengal                              | 112                                | 787          | 48             | 53     | 1000   | 16660                                      | 623    |
| A & N Islands                            | 299                                | 601          | 64             | 37     | 1000   | 16                                         | 8      |
| Chandigarh                               | 284                                | 276          | 0              | 440    | 1000   | 6                                          | 9      |
| Dadra & N. Haveli                        | 0                                  | 1000         | 0              | 0      | 1000   | 34                                         | 8      |
| Daman & Diu                              | 155                                | 728          | 0              | 117    | 1000   | 10                                         | 10     |
| Lakshadweep                              | 24                                 | 751          | 85             | 140    | 1000   | 7                                          | 18     |
| Pondicherry                              | 0                                  | 902          | 0              | 98     | 1000   | 83                                         | 12     |
| ONES                                     | 93                                 | 803          | 41             | 63     | 1000   | 1479                                       | 544    |
| GUTs                                     | 53                                 | 849          | 11             | 87     | 1000   | 157                                        | 65     |
| all-India                                | 159                                | 746          | 31             | 63     | 1000   | 210689                                     | 9110   |
| estd. no. of eco. dep. aged persons (00) | 33532                              | 157196       | 6612           | 13349  | 210689 | X                                          | X      |
| sample eco. dep. aged persons            | 1537                               | 6763         | 274            | 536    | 9110   | X                                          | X      |

Table (13): Per 1000 distribution of economically dependent aged persons by category of persons financially supporting the aged person for each sex

| Rural<br>state/ut                           | persons supporting the aged person |                 |                   |        |        | Persons<br>no. of economically<br>dependent aged persons |        |
|---------------------------------------------|------------------------------------|-----------------|-------------------|--------|--------|----------------------------------------------------------|--------|
|                                             | spouse                             | own<br>children | grand<br>children | others | total  | estd. (00)                                               | sample |
|                                             | (1)                                | (2)             | (3)               | (4)    | (5)    | (6)                                                      | (7)    |
| Andhra Pradesh                              | 89                                 | 813             | 23                | 75     | 1000   | 26313                                                    | 980    |
| Arunachal Pradesh                           | 40                                 | 869             | 2                 | 89     | 1000   | 256                                                      | 150    |
| Assam                                       | 40                                 | 907             | 21                | 32     | 1000   | 6875                                                     | 526    |
| Bihar                                       | 175                                | 763             | 23                | 39     | 1000   | 20020                                                    | 899    |
| Chhattisgarh                                | 123                                | 689             | 36                | 151    | 1000   | 6754                                                     | 302    |
| Delhi                                       | 193                                | 667             | 35                | 105    | 1000   | 524                                                      | 27     |
| Goa                                         | 348                                | 652             | 0                 | 0      | 1000   | 539                                                      | 30     |
| Gujarat                                     | 96                                 | 838             | 29                | 37     | 1000   | 14287                                                    | 492    |
| Haryana                                     | 104                                | 830             | 5                 | 61     | 1000   | 8306                                                     | 362    |
| Himachal Pradesh                            | 134                                | 785             | 24                | 57     | 1000   | 2964                                                     | 431    |
| Jammu & Kashmir                             | 159                                | 771             | 30                | 40     | 1000   | 2105                                                     | 230    |
| Jharkhand                                   | 110                                | 805             | 60                | 25     | 1000   | 6412                                                     | 324    |
| Karnataka                                   | 102                                | 792             | 33                | 73     | 1000   | 14498                                                    | 539    |
| Kerala                                      | 85                                 | 840             | 20                | 55     | 1000   | 20679                                                    | 890    |
| Madhya Pradesh                              | 162                                | 726             | 41                | 71     | 1000   | 17943                                                    | 678    |
| Maharashtra                                 | 120                                | 787             | 18                | 74     | 1000   | 31555                                                    | 972    |
| Manipur                                     | 117                                | 766             | 56                | 61     | 1000   | 426                                                      | 240    |
| Meghalaya                                   | 27                                 | 915             | 0                 | 57     | 1000   | 524                                                      | 114    |
| Mizoram                                     | 261                                | 715             | 0                 | 24     | 1000   | 97                                                       | 66     |
| Nagaland                                    | 102                                | 834             | 64                | 0      | 1000   | 83                                                       | 45     |
| Orissa                                      | 144                                | 763             | 36                | 57     | 1000   | 18007                                                    | 728    |
| Punjab                                      | 190                                | 761             | 35                | 13     | 1000   | 9487                                                     | 350    |
| Rajasthan                                   | 136                                | 773             | 42                | 49     | 1000   | 18155                                                    | 825    |
| Sikkim                                      | 228                                | 654             | 61                | 56     | 1000   | 133                                                      | 130    |
| Tamil Nadu                                  | 105                                | 819             | 23                | 53     | 1000   | 22544                                                    | 769    |
| Tripura                                     | 63                                 | 848             | 50                | 39     | 1000   | 1086                                                     | 215    |
| Uttaranchal                                 | 164                                | 786             | 34                | 16     | 1000   | 2272                                                     | 78     |
| Uttar Pradesh                               | 172                                | 724             | 22                | 82     | 1000   | 51310                                                    | 2088   |
| West Bengal                                 | 95                                 | 816             | 40                | 49     | 1000   | 25959                                                    | 992    |
| A & N Islands                               | 323                                | 609             | 37                | 31     | 1000   | 28                                                       | 14     |
| Chandigarh                                  | 300                                | 270             | 0                 | 430    | 1000   | 6                                                        | 10     |
| Dadra & N. Haveli                           | 0                                  | 904             | 0                 | 96     | 1000   | 99                                                       | 25     |
| Daman & Diu                                 | 203                                | 692             | 0                 | 106    | 1000   | 11                                                       | 13     |
| Lakshadweep                                 | 14                                 | 759             | 51                | 176    | 1000   | 12                                                       | 28     |
| Pondicherry                                 | 0                                  | 938             | 0                 | 62     | 1000   | 132                                                      | 20     |
| ONES                                        | 79                                 | 835             | 35                | 50     | 1000   | 2605                                                     | 960    |
| GUTs                                        | 47                                 | 862             | 6                 | 85     | 1000   | 289                                                      | 110    |
| all-India                                   | 127                                | 784             | 28                | 61     | 1000   | 330404                                                   | 14582  |
| estd. no. of eco. dep.<br>aged persons (00) | 41958                              | 258996          | 9242              | 20208  | 330404 | X                                                        | X      |
| sample eco. dep. aged<br>persons            | 1909                               | 11413           | 403               | 857    | 14582  | X                                                        | X      |



Table (13): Per 1000 distribution of economically dependent aged persons by category of persons financially supporting the aged person for each sex

| Urban                                    |                                    |              |                |        |       | Males                                      |        |
|------------------------------------------|------------------------------------|--------------|----------------|--------|-------|--------------------------------------------|--------|
| state/ut                                 | persons supporting the aged person |              |                |        |       | no. of economically dependent aged persons |        |
|                                          | spouse                             | own children | grand children | others | total | estd. (00)                                 | sample |
| (1)                                      | (2)                                | (3)          | (4)            | (5)    | (6)   | (7)                                        | (8)    |
| Andhra Pradesh                           | 51                                 | 880          | 15             | 54     | 1000  | 2284                                       | 164    |
| Arunachal Pradesh                        | 0                                  | 855          | 0              | 145    | 1000  | 6                                          | 26     |
| Assam                                    | 147                                | 827          | 0              | 26     | 1000  | 283                                        | 44     |
| Bihar                                    | 53                                 | 911          | 1              | 35     | 1000  | 1233                                       | 71     |
| Chhattisgarh                             | 216                                | 724          | 60             | 0      | 1000  | 265                                        | 27     |
| Delhi                                    | 77                                 | 838          | 82             | 3      | 1000  | 826                                        | 80     |
| Goa                                      | 85                                 | 659          | 0              | 255    | 1000  | 143                                        | 18     |
| Gujarat                                  | 51                                 | 895          | 36             | 18     | 1000  | 2183                                       | 136    |
| Haryana                                  | 88                                 | 882          | 12             | 18     | 1000  | 666                                        | 70     |
| Himachal Pradesh                         | 0                                  | 943          | 0              | 57     | 1000  | 39                                         | 15     |
| Jammu & Kashmir                          | 0                                  | 929          | 0              | 71     | 1000  | 151                                        | 30     |
| Jharkhand                                | 44                                 | 951          | 0              | 5      | 1000  | 682                                        | 73     |
| Karnataka                                | 67                                 | 847          | 25             | 60     | 1000  | 1794                                       | 147    |
| Kerala                                   | 74                                 | 810          | 0              | 116    | 1000  | 2102                                       | 142    |
| Madhya Pradesh                           | 42                                 | 851          | 24             | 83     | 1000  | 1422                                       | 112    |
| Maharashtra                              | 19                                 | 932          | 11             | 39     | 1000  | 6359                                       | 260    |
| Manipur                                  | 292                                | 705          | 2              | 0      | 1000  | 99                                         | 66     |
| Meghalaya                                | 107                                | 893          | 0              | 0      | 1000  | 4                                          | 6      |
| Mizoram                                  | 36                                 | 878          | 0              | 86     | 1000  | 30                                         | 59     |
| Nagaland                                 | 0                                  | 1000         | 0              | 0      | 1000  | 19                                         | 9      |
| Orissa                                   | 69                                 | 808          | 44             | 79     | 1000  | 751                                        | 74     |
| Punjab                                   | 172                                | 771          | 19             | 38     | 1000  | 1229                                       | 82     |
| Rajasthan                                | 28                                 | 926          | 22             | 24     | 1000  | 1344                                       | 122    |
| Sikkim                                   | 0                                  | 1000         | 0              | 0      | 1000  | 3                                          | 5      |
| Tamil Nadu                               | 51                                 | 856          | 25             | 68     | 1000  | 3635                                       | 286    |
| Tripura                                  | 40                                 | 960          | 0              | 0      | 1000  | 62                                         | 17     |
| Uttaranchal                              | 0                                  | 928          | 0              | 72     | 1000  | 97                                         | 11     |
| Uttar Pradesh                            | 75                                 | 824          | 19             | 82     | 1000  | 3507                                       | 231    |
| West Bengal                              | 91                                 | 811          | 5              | 93     | 1000  | 2861                                       | 177    |
| A & N Islands                            | 0                                  | 1000         | 0              | 0      | 1000  | 2                                          | 1      |
| Chandigarh                               | 0                                  | 943          | 57             | 0      | 1000  | 23                                         | 14     |
| Dadra & N. Haveli                        | 0                                  | 1000         | 0              | 0      | 1000  | 2                                          | 6      |
| Daman & Diu                              | 128                                | 780          | 0              | 92     | 1000  | 7                                          | 12     |
| Lakshadweep                              | 0                                  | 885          | 0              | 115    | 1000  | 7                                          | 19     |
| Pondicherry                              | 58                                 | 844          | 0              | 98     | 1000  | 119                                        | 25     |
| ONES                                     | 148                                | 835          | 1              | 16     | 1000  | 222                                        | 188    |
| GUTs                                     | 48                                 | 861          | 8              | 82     | 1000  | 161                                        | 77     |
| all-India                                | 60                                 | 865          | 18             | 57     | 1000  | 34239                                      | 2637   |
| estd. no. of eco. dep. aged persons (00) | 2064                               | 29604        | 616            | 1955   | 34239 | X                                          | X      |
| sample eco. dep. aged persons            | 172                                | 2250         | 52             | 163    | 2637  | X                                          | X      |

Table (13): Per 1000 distribution of economically dependent aged persons by category of persons financially supporting the aged person for each sex

| Urban<br>state/ut                        | persons supporting the aged person |              |                |        |       | Females<br>no. of economically dependent aged persons |        |
|------------------------------------------|------------------------------------|--------------|----------------|--------|-------|-------------------------------------------------------|--------|
|                                          | spouse                             | own children | grand children | others | total | estd. (00)                                            | sample |
|                                          | (1)                                | (2)          | (3)            | (4)    | (5)   | (6)                                                   | (7)    |
| Andhra Pradesh                           | 175                                | 748          | 21             | 56     | 1000  | 4548                                                  | 336    |
| Arunachal Pradesh                        | 11                                 | 780          | 45             | 163    | 1000  | 6                                                     | 22     |
| Assam                                    | 152                                | 833          | 0              | 15     | 1000  | 374                                                   | 68     |
| Bihar                                    | 309                                | 664          | 8              | 18     | 1000  | 1466                                                  | 116    |
| Chhattisgarh                             | 233                                | 659          | 48             | 60     | 1000  | 583                                                   | 72     |
| Delhi                                    | 287                                | 564          | 114            | 34     | 1000  | 1736                                                  | 165    |
| Goa                                      | 117                                | 766          | 5              | 112    | 1000  | 247                                                   | 38     |
| Gujarat                                  | 194                                | 748          | 20             | 37     | 1000  | 4461                                                  | 279    |
| Haryana                                  | 154                                | 783          | 8              | 54     | 1000  | 1370                                                  | 119    |
| Himachal Pradesh                         | 233                                | 727          | 20             | 20     | 1000  | 107                                                   | 36     |
| Jammu & Kashmir                          | 231                                | 746          | 0              | 23     | 1000  | 296                                                   | 72     |
| Jharkhand                                | 213                                | 722          | 18             | 47     | 1000  | 1096                                                  | 121    |
| Karnataka                                | 132                                | 760          | 41             | 66     | 1000  | 3491                                                  | 299    |
| Kerala                                   | 101                                | 765          | 18             | 117    | 1000  | 3724                                                  | 249    |
| Madhya Pradesh                           | 246                                | 659          | 29             | 65     | 1000  | 3513                                                  | 259    |
| Maharashtra                              | 153                                | 751          | 21             | 74     | 1000  | 11043                                                 | 549    |
| Manipur                                  | 172                                | 732          | 6              | 90     | 1000  | 139                                                   | 93     |
| Meghalaya                                | 87                                 | 881          | 0              | 32     | 1000  | 36                                                    | 34     |
| Mizoram                                  | 166                                | 801          | 7              | 25     | 1000  | 45                                                    | 74     |
| Nagaland                                 | 622                                | 378          | 0              | 0      | 1000  | 5                                                     | 3      |
| Orissa                                   | 139                                | 796          | 12             | 53     | 1000  | 1061                                                  | 102    |
| Punjab                                   | 285                                | 656          | 34             | 24     | 1000  | 2038                                                  | 138    |
| Rajasthan                                | 194                                | 730          | 23             | 53     | 1000  | 2680                                                  | 236    |
| Sikkim                                   | 318                                | 682          | 0              | 0      | 1000  | 5                                                     | 9      |
| Tamil Nadu                               | 152                                | 738          | 31             | 79     | 1000  | 7250                                                  | 541    |
| Tripura                                  | 30                                 | 879          | 16             | 75     | 1000  | 103                                                   | 44     |
| Uttaranchal                              | 410                                | 521          | 69             | 0      | 1000  | 542                                                   | 38     |
| Uttar Pradesh                            | 243                                | 636          | 46             | 75     | 1000  | 8119                                                  | 522    |
| West Bengal                              | 224                                | 652          | 28             | 96     | 1000  | 6710                                                  | 417    |
| A & N Islands                            | 520                                | 299          | 0              | 182    | 1000  | 12                                                    | 15     |
| Chandigarh                               | 442                                | 462          | 0              | 96     | 1000  | 86                                                    | 39     |
| Dadra & N. Haveli                        | 223                                | 659          | 29             | 89     | 1000  | 3                                                     | 14     |
| Daman & Diu                              | 56                                 | 944          | 0              | 0      | 1000  | 14                                                    | 19     |
| Lakshadweep                              | 33                                 | 809          | 0              | 158    | 1000  | 10                                                    | 23     |
| Pondicherry                              | 62                                 | 795          | 36             | 107    | 1000  | 330                                                   | 49     |
| ONES                                     | 124                                | 797          | 9              | 70     | 1000  | 339                                                   | 279    |
| GUTs                                     | 146                                | 723          | 26             | 104    | 1000  | 456                                                   | 159    |
| all-India                                | 192                                | 710          | 30             | 68     | 1000  | 67250                                                 | 5210   |
| estd. no. of eco. dep. aged persons (00) | 12917                              | 47763        | 1991           | 4578   | 67250 | X                                                     | X      |
| sample eco. dep. aged persons            | 1003                               | 3711         | 161            | 335    | 5210  | X                                                     | X      |

Table (13): Per 1000 distribution of economically dependent aged persons by category of persons financially supporting the aged person for each sex

| Urban<br>state/ut                           | persons supporting the aged person |                 |                   |        |        | Persons<br>no. of economically<br>dependent aged persons |        |
|---------------------------------------------|------------------------------------|-----------------|-------------------|--------|--------|----------------------------------------------------------|--------|
|                                             | spouse                             | own<br>children | grand<br>children | others | total  | estd. (00)                                               | sample |
|                                             | (1)                                | (2)             | (3)               | (4)    | (5)    | (6)                                                      | (7)    |
| Andhra Pradesh                              | 134                                | 792             | 19                | 55     | 1000   | 6832                                                     | 500    |
| Arunachal Pradesh                           | 6                                  | 818             | 22                | 154    | 1000   | 12                                                       | 48     |
| Assam                                       | 150                                | 830             | 0                 | 20     | 1000   | 657                                                      | 112    |
| Bihar                                       | 192                                | 777             | 5                 | 26     | 1000   | 2698                                                     | 187    |
| Chhattisgarh                                | 227                                | 679             | 52                | 42     | 1000   | 847                                                      | 99     |
| Delhi                                       | 219                                | 653             | 104               | 24     | 1000   | 2563                                                     | 245    |
| Goa                                         | 106                                | 727             | 3                 | 164    | 1000   | 390                                                      | 56     |
| Gujarat                                     | 147                                | 796             | 25                | 31     | 1000   | 6644                                                     | 415    |
| Haryana                                     | 132                                | 816             | 10                | 42     | 1000   | 2036                                                     | 189    |
| Himachal Pradesh                            | 171                                | 785             | 14                | 30     | 1000   | 145                                                      | 51     |
| Jammu & Kashmir                             | 153                                | 807             | 0                 | 39     | 1000   | 447                                                      | 102    |
| Jharkhand                                   | 148                                | 810             | 11                | 31     | 1000   | 1778                                                     | 194    |
| Karnataka                                   | 110                                | 790             | 36                | 64     | 1000   | 5286                                                     | 446    |
| Kerala                                      | 91                                 | 781             | 11                | 116    | 1000   | 5827                                                     | 391    |
| Madhya Pradesh                              | 187                                | 715             | 28                | 70     | 1000   | 4935                                                     | 371    |
| Maharashtra                                 | 104                                | 817             | 17                | 61     | 1000   | 17402                                                    | 809    |
| Manipur                                     | 222                                | 721             | 4                 | 53     | 1000   | 238                                                      | 159    |
| Meghalaya                                   | 89                                 | 882             | 0                 | 29     | 1000   | 40                                                       | 40     |
| Mizoram                                     | 114                                | 832             | 4                 | 50     | 1000   | 75                                                       | 133    |
| Nagaland                                    | 123                                | 877             | 0                 | 0      | 1000   | 23                                                       | 12     |
| Orissa                                      | 110                                | 801             | 25                | 64     | 1000   | 1813                                                     | 176    |
| Punjab                                      | 243                                | 699             | 29                | 29     | 1000   | 3267                                                     | 220    |
| Rajasthan                                   | 139                                | 795             | 23                | 43     | 1000   | 4024                                                     | 358    |
| Sikkim                                      | 204                                | 796             | 0                 | 0      | 1000   | 7                                                        | 14     |
| Tamil Nadu                                  | 118                                | 777             | 29                | 75     | 1000   | 10886                                                    | 827    |
| Tripura                                     | 34                                 | 909             | 10                | 47     | 1000   | 165                                                      | 61     |
| Uttaranchal                                 | 348                                | 582             | 59                | 11     | 1000   | 638                                                      | 49     |
| Uttar Pradesh                               | 192                                | 693             | 38                | 77     | 1000   | 11626                                                    | 753    |
| West Bengal                                 | 184                                | 700             | 21                | 95     | 1000   | 9571                                                     | 594    |
| A & N Islands                               | 446                                | 399             | 0                 | 156    | 1000   | 14                                                       | 16     |
| Chandigarh                                  | 349                                | 564             | 12                | 75     | 1000   | 109                                                      | 53     |
| Dadra & N. Haveli                           | 129                                | 804             | 17                | 51     | 1000   | 6                                                        | 20     |
| Daman & Diu                                 | 80                                 | 889             | 0                 | 31     | 1000   | 21                                                       | 31     |
| Lakshadweep                                 | 19                                 | 842             | 0                 | 140    | 1000   | 17                                                       | 42     |
| Pondicherry                                 | 61                                 | 808             | 27                | 105    | 1000   | 449                                                      | 74     |
| ONES                                        | 133                                | 812             | 6                 | 48     | 1000   | 561                                                      | 467    |
| GUTs                                        | 121                                | 759             | 22                | 99     | 1000   | 617                                                      | 236    |
| all-India                                   | 148                                | 762             | 26                | 64     | 1000   | 101489                                                   | 7847   |
| estd. no. of eco. dep.<br>aged persons (00) | 14981                              | 77367           | 2607              | 6533   | 101489 | X                                                        | X      |
| sample eco. dep. aged<br>persons            | 1175                               | 5961            | 213               | 498    | 7847   | X                                                        | X      |

Table (13): Per 1000 distribution of economically dependent aged persons by category of persons financially supporting the aged person for each sex

| Rural + Urban                            |                                    |              |                |        |        | Males                                      |        |
|------------------------------------------|------------------------------------|--------------|----------------|--------|--------|--------------------------------------------|--------|
| state/ut                                 | persons supporting the aged person |              |                |        |        | no. of economically dependent aged persons |        |
|                                          | spouse                             | own children | grand children | others | total  | estd. (00)                                 | sample |
| (1)                                      | (2)                                | (3)          | (4)            | (5)    | (6)    | (7)                                        | (8)    |
| Andhra Pradesh                           | 92                                 | 844          | 18             | 46     | 1000   | 11732                                      | 550    |
| Arunachal Pradesh                        | 46                                 | 864          | 3              | 87     | 1000   | 110                                        | 88     |
| Assam                                    | 24                                 | 938          | 21             | 17     | 1000   | 3458                                       | 289    |
| Bihar                                    | 81                                 | 861          | 21             | 38     | 1000   | 8842                                       | 431    |
| Chhattisgarh                             | 119                                | 714          | 38             | 129    | 1000   | 2245                                       | 119    |
| Delhi                                    | 72                                 | 832          | 67             | 29     | 1000   | 1028                                       | 90     |
| Goa                                      | 54                                 | 786          | 0              | 161    | 1000   | 227                                        | 24     |
| Gujarat                                  | 25                                 | 920          | 24             | 30     | 1000   | 7419                                       | 309    |
| Haryana                                  | 26                                 | 914          | 2              | 58     | 1000   | 4160                                       | 229    |
| Himachal Pradesh                         | 32                                 | 860          | 17             | 90     | 1000   | 1004                                       | 171    |
| Jammu & Kashmir                          | 16                                 | 865          | 27             | 92     | 1000   | 877                                        | 109    |
| Jharkhand                                | 56                                 | 873          | 43             | 28     | 1000   | 3482                                       | 200    |
| Karnataka                                | 110                                | 803          | 26             | 61     | 1000   | 7127                                       | 340    |
| Kerala                                   | 78                                 | 846          | 6              | 70     | 1000   | 9528                                       | 456    |
| Madhya Pradesh                           | 50                                 | 834          | 51             | 66     | 1000   | 7314                                       | 338    |
| Maharashtra                              | 66                                 | 883          | 13             | 38     | 1000   | 18197                                      | 637    |
| Manipur                                  | 197                                | 737          | 46             | 20     | 1000   | 308                                        | 182    |
| Meghalaya                                | 40                                 | 960          | 0              | 0      | 1000   | 194                                        | 51     |
| Mizoram                                  | 141                                | 823          | 0              | 36     | 1000   | 72                                         | 87     |
| Nagaland                                 | 54                                 | 872          | 74             | 0      | 1000   | 71                                         | 35     |
| Orissa                                   | 125                                | 787          | 27             | 61     | 1000   | 7843                                       | 367    |
| Punjab                                   | 108                                | 834          | 26             | 33     | 1000   | 4867                                       | 217    |
| Rajasthan                                | 29                                 | 867          | 32             | 72     | 1000   | 7731                                       | 413    |
| Sikkim                                   | 24                                 | 896          | 38             | 43     | 1000   | 47                                         | 53     |
| Tamil Nadu                               | 85                                 | 864          | 16             | 35     | 1000   | 12344                                      | 594    |
| Tripura                                  | 24                                 | 918          | 18             | 39     | 1000   | 546                                        | 108    |
| Uttaranchal                              | 89                                 | 847          | 40             | 24     | 1000   | 968                                        | 38     |
| Uttar Pradesh                            | 40                                 | 836          | 15             | 110    | 1000   | 19760                                      | 916    |
| West Bengal                              | 72                                 | 855          | 20             | 52     | 1000   | 12160                                      | 546    |
| A & N Islands                            | 305                                | 675          | 0              | 20     | 1000   | 14                                         | 7      |
| Chandigarh                               | 6                                  | 937          | 57             | 0      | 1000   | 23                                         | 15     |
| Dadra & N. Haveli                        | 0                                  | 859          | 0              | 141    | 1000   | 68                                         | 23     |
| Daman & Diu                              | 196                                | 724          | 0              | 80     | 1000   | 8                                          | 15     |
| Lakshadweep                              | 0                                  | 840          | 0              | 160    | 1000   | 12                                         | 29     |
| Pondicherry                              | 41                                 | 889          | 0              | 70     | 1000   | 167                                        | 33     |
| ONES                                     | 75                                 | 870          | 23             | 31     | 1000   | 1348                                       | 604    |
| GUTs                                     | 44                                 | 869          | 5              | 83     | 1000   | 293                                        | 122    |
| all-India                                | 68                                 | 854          | 21             | 57     | 1000   | 153953                                     | 8109   |
| estd. no. of eco. dep. aged persons (00) | 10490                              | 131404       | 3246           | 8813   | 153953 | X                                          | X      |
| sample eco. dep. aged persons            | 544                                | 6900         | 181            | 484    | 8109   | X                                          | X      |

Table (13): Per 1000 distribution of economically dependent aged persons by category of persons financially supporting the aged person for each sex

| Rural + Urban                            |                                    |              |                |        |        | Females                                    |        |
|------------------------------------------|------------------------------------|--------------|----------------|--------|--------|--------------------------------------------|--------|
| state/ut                                 | persons supporting the aged person |              |                |        |        | no. of economically dependent aged persons |        |
|                                          | spouse                             | own children | grand children | others | total  | estd. (00)                                 | sample |
| (1)                                      | (2)                                | (3)          | (4)            | (5)    | (6)    | (7)                                        | (8)    |
| Andhra Pradesh                           | 102                                | 790          | 24             | 84     | 1000   | 21413                                      | 930    |
| Arunachal Pradesh                        | 33                                 | 868          | 3              | 96     | 1000   | 158                                        | 110    |
| Assam                                    | 71                                 | 868          | 17             | 43     | 1000   | 4074                                       | 349    |
| Bihar                                    | 238                                | 703          | 21             | 38     | 1000   | 13877                                      | 655    |
| Chhattisgarh                             | 142                                | 678          | 38             | 143    | 1000   | 5356                                       | 282    |
| Delhi                                    | 286                                | 567          | 105            | 42     | 1000   | 2058                                       | 182    |
| Goa                                      | 309                                | 650          | 2              | 39     | 1000   | 702                                        | 62     |
| Gujarat                                  | 160                                | 773          | 30             | 37     | 1000   | 13512                                      | 598    |
| Haryana                                  | 166                                | 769          | 9              | 56     | 1000   | 6182                                       | 322    |
| Himachal Pradesh                         | 185                                | 749          | 26             | 40     | 1000   | 2106                                       | 311    |
| Jammu & Kashmir                          | 233                                | 731          | 24             | 13     | 1000   | 1674                                       | 223    |
| Jharkhand                                | 165                                | 756          | 54             | 25     | 1000   | 4708                                       | 318    |
| Karnataka                                | 101                                | 785          | 38             | 76     | 1000   | 12657                                      | 645    |
| Kerala                                   | 91                                 | 816          | 24             | 68     | 1000   | 16979                                      | 825    |
| Madhya Pradesh                           | 223                                | 672          | 32             | 73     | 1000   | 15564                                      | 711    |
| Maharashtra                              | 143                                | 747          | 21             | 89     | 1000   | 30760                                      | 1144   |
| Manipur                                  | 117                                | 761          | 31             | 91     | 1000   | 356                                        | 217    |
| Meghalaya                                | 28                                 | 888          | 0              | 84     | 1000   | 370                                        | 103    |
| Mizoram                                  | 236                                | 726          | 3              | 34     | 1000   | 100                                        | 112    |
| Nagaland                                 | 215                                | 785          | 0              | 0      | 1000   | 35                                         | 22     |
| Orissa                                   | 151                                | 754          | 41             | 55     | 1000   | 11977                                      | 537    |
| Punjab                                   | 263                                | 690          | 39             | 8      | 1000   | 7888                                       | 353    |
| Rajasthan                                | 195                                | 729          | 42             | 35     | 1000   | 14448                                      | 770    |
| Sikkim                                   | 330                                | 543          | 69             | 59     | 1000   | 93                                         | 91     |
| Tamil Nadu                               | 124                                | 771          | 31             | 75     | 1000   | 21086                                      | 1002   |
| Tripura                                  | 86                                 | 808          | 65             | 41     | 1000   | 706                                        | 168    |
| Uttaranchal                              | 262                                | 689          | 39             | 10     | 1000   | 1943                                       | 89     |
| Uttar Pradesh                            | 237                                | 665          | 30             | 68     | 1000   | 43176                                      | 1925   |
| West Bengal                              | 144                                | 748          | 42             | 66     | 1000   | 23370                                      | 1040   |
| A & N Islands                            | 393                                | 472          | 36             | 98     | 1000   | 29                                         | 23     |
| Chandigarh                               | 431                                | 450          | 0              | 119    | 1000   | 93                                         | 48     |
| Dadra & N. Haveli                        | 20                                 | 969          | 3              | 8      | 1000   | 37                                         | 22     |
| Daman & Diu                              | 97                                 | 855          | 0              | 48     | 1000   | 24                                         | 29     |
| Lakshadweep                              | 29                                 | 784          | 37             | 151    | 1000   | 17                                         | 41     |
| Pondicherry                              | 49                                 | 817          | 29             | 105    | 1000   | 413                                        | 61     |
| ONES                                     | 99                                 | 802          | 35             | 64     | 1000   | 1818                                       | 823    |
| GUTs                                     | 123                                | 755          | 22             | 100    | 1000   | 613                                        | 224    |
| all-India                                | 167                                | 737          | 31             | 65     | 1000   | 277939                                     | 14320  |
| estd. no. of eco. dep. aged persons (00) | 46449                              | 204959       | 8603           | 17928  | 277939 | X                                          | X      |
| sample eco. dep. aged persons            | 2540                               | 10474        | 435            | 871    | 14320  | X                                          | X      |

Table (13): Per 1000 distribution of economically dependent aged persons by category of persons financially supporting the aged person for each sex

| state/ut                                 | persons supporting the aged person |              |                |        |        | Persons                                    |        |
|------------------------------------------|------------------------------------|--------------|----------------|--------|--------|--------------------------------------------|--------|
|                                          | spouse                             | own children | grand children | others | total  | no. of economically dependent aged persons |        |
|                                          |                                    |              |                |        |        | estd. (00)                                 | sample |
| (1)                                      | (2)                                | (3)          | (4)            | (5)    | (6)    | (7)                                        | (8)    |
| Andhra Pradesh                           | 98                                 | 809          | 22             | 71     | 1000   | 33145                                      | 1480   |
| Arunachal Pradesh                        | 38                                 | 866          | 3              | 92     | 1000   | 268                                        | 198    |
| Assam                                    | 49                                 | 901          | 19             | 31     | 1000   | 7532                                       | 638    |
| Bihar                                    | 177                                | 764          | 21             | 38     | 1000   | 22718                                      | 1086   |
| Chhattisgarh                             | 135                                | 688          | 38             | 139    | 1000   | 7601                                       | 401    |
| Delhi                                    | 215                                | 655          | 92             | 38     | 1000   | 3086                                       | 272    |
| Goa                                      | 246                                | 683          | 1              | 69     | 1000   | 929                                        | 86     |
| Gujarat                                  | 113                                | 825          | 28             | 35     | 1000   | 20931                                      | 907    |
| Haryana                                  | 110                                | 827          | 6              | 57     | 1000   | 10342                                      | 551    |
| Himachal Pradesh                         | 135                                | 785          | 23             | 56     | 1000   | 3110                                       | 482    |
| Jammu & Kashmir                          | 158                                | 777          | 25             | 40     | 1000   | 2552                                       | 332    |
| Jharkhand                                | 119                                | 806          | 49             | 26     | 1000   | 8190                                       | 518    |
| Karnataka                                | 104                                | 792          | 33             | 71     | 1000   | 19784                                      | 985    |
| Kerala                                   | 86                                 | 827          | 18             | 69     | 1000   | 26506                                      | 1281   |
| Madhya Pradesh                           | 167                                | 724          | 38             | 71     | 1000   | 22878                                      | 1049   |
| Maharashtra                              | 114                                | 798          | 18             | 70     | 1000   | 48957                                      | 1781   |
| Manipur                                  | 154                                | 750          | 38             | 58     | 1000   | 664                                        | 399    |
| Meghalaya                                | 32                                 | 913          | 0              | 55     | 1000   | 564                                        | 154    |
| Mizoram                                  | 197                                | 766          | 2              | 35     | 1000   | 172                                        | 199    |
| Nagaland                                 | 106                                | 843          | 50             | 0      | 1000   | 106                                        | 57     |
| Orissa                                   | 140                                | 767          | 35             | 57     | 1000   | 19820                                      | 904    |
| Punjab                                   | 204                                | 745          | 34             | 17     | 1000   | 12754                                      | 570    |
| Rajasthan                                | 137                                | 777          | 38             | 48     | 1000   | 22179                                      | 1183   |
| Sikkim                                   | 227                                | 661          | 58             | 53     | 1000   | 140                                        | 144    |
| Tamil Nadu                               | 110                                | 805          | 25             | 60     | 1000   | 33430                                      | 1596   |
| Tripura                                  | 59                                 | 856          | 44             | 40     | 1000   | 1251                                       | 276    |
| Uttaranchal                              | 205                                | 741          | 39             | 15     | 1000   | 2911                                       | 127    |
| Uttar Pradesh                            | 175                                | 718          | 25             | 81     | 1000   | 62936                                      | 2841   |
| West Bengal                              | 119                                | 785          | 35             | 61     | 1000   | 35530                                      | 1586   |
| A & N Islands                            | 364                                | 538          | 25             | 73     | 1000   | 43                                         | 30     |
| Chandigarh                               | 346                                | 548          | 11             | 95     | 1000   | 116                                        | 63     |
| Dadra & N. Haveli                        | 7                                  | 898          | 1              | 94     | 1000   | 105                                        | 45     |
| Daman & Diu                              | 122                                | 822          | 0              | 56     | 1000   | 32                                         | 44     |
| Lakshadweep                              | 17                                 | 807          | 21             | 155    | 1000   | 29                                         | 70     |
| Pondicherry                              | 47                                 | 838          | 21             | 95     | 1000   | 581                                        | 94     |
| ONES                                     | 89                                 | 831          | 30             | 50     | 1000   | 3165                                       | 1427   |
| GUTs                                     | 97                                 | 792          | 17             | 94     | 1000   | 906                                        | 346    |
| all-India                                | 132                                | 779          | 27             | 62     | 1000   | 431892                                     | 22429  |
| estd. no. of eco. dep. aged persons (00) | 56939                              | 336363       | 11849          | 26741  | 431892 | X                                          | X      |
| sample eco. dep. aged persons            | 3084                               | 17374        | 616            | 1355   | 22429  | X                                          | X      |

1

2

3

4

5

6

7

8

9

10

11

12

13

14

15

16

17

18

19

20

21

22

23

24

25

26

27

28

29

30

31

32

33

34

35

36

37

38

39

40

41

42

43

44

45

46

47

48

49

50

51

52

53

54

55

56

57

58

59

60

Table (14): Per 1000 distribution of aged persons by type of living arrangement for each sex and State/UT

| State/ut          | living arrangement of aged persons |                                  |                  |                             |                         |                 |               |      |       | Males               |        |
|-------------------|------------------------------------|----------------------------------|------------------|-----------------------------|-------------------------|-----------------|---------------|------|-------|---------------------|--------|
|                   | living alone                       |                                  | with spouse only | with spouse & other members | without spouse but with |                 |               | n.r. | total | no. of aged persons |        |
|                   | as an inmate of old age home       | not as an inmate of old age home |                  |                             | children                | other relations | non-relations |      |       | estd. (00)          | sample |
| (1)               | (2)                                | (3)                              | (4)              | (5)                         | (6)                     | (7)             | (8)           | (9)  | (10)  | (11)                | (12)   |
| Andhra Pradesh    | 1                                  | 36                               | 324              | 479                         | 138                     | 11              | 1             | 10   | 1000  | 18730               | 69     |
| Arunachal Pradesh | 0                                  | 21                               | 45               | 560                         | 125                     | 0               | 0             | 250  | 1000  | 238                 | 140    |
| Assam             | 0                                  | 3                                | 42               | 733                         | 165                     | 9               | 1             | 47   | 1000  | 6103                | 47     |
| Bihar             | 12                                 | 19                               | 149              | 599                         | 193                     | 7               | 3             | 19   | 1000  | 18861               | 91     |
| Chhattisgarh      | 24                                 | 13                               | 181              | 510                         | 204                     | 13              | 22            | 33   | 1000  | 4609                | 20     |
| Delhi             | 0                                  | 0                                | 0                | 757                         | 114                     | 129             | 0             | 0    | 1000  | 338                 | 10     |
| Goa               | 0                                  | 0                                | 270              | 657                         | 28                      | 46              | 0             | 0    | 1000  | 506                 | 19     |
| Gujarat           | 0                                  | 40                               | 182              | 551                         | 207                     | 14              | 0             | 6    | 1000  | 10458               | 35     |
| Haryana           | 0                                  | 0                                | 70               | 696                         | 209                     | 23              | 0             | 1    | 1000  | 5608                | 25     |
| Himachal Pradesh  | 2                                  | 40                               | 132              | 596                         | 181                     | 16              | 13            | 19   | 1000  | 2400                | 34     |
| Jammu & Kashmir   | 0                                  | 0                                | 35               | 699                         | 208                     | 33              | 2             | 23   | 1000  | 2246                | 230    |
| Jharkhand         | 1                                  | 27                               | 146              | 537                         | 238                     | 33              | 1             | 16   | 1000  | 6400                | 330    |
| Karnataka         | 2                                  | 19                               | 138              | 685                         | 129                     | 26              | 0             | 1    | 1000  | 11642               | 42     |
| Kerala            | 0                                  | 13                               | 127              | 698                         | 137                     | 22              | 1             | 2    | 1000  | 11673               | 50     |
| Madhya Pradesh    | 12                                 | 21                               | 190              | 545                         | 161                     | 44              | 3             | 25   | 1000  | 14666               | 54     |
| Maharashtra       | 2                                  | 21                               | 184              | 644                         | 124                     | 21              | 0             | 5    | 1000  | 23347               | 71     |
| Manipur           | 14                                 | 21                               | 59               | 516                         | 179                     | 9               | 10            | 192  | 1000  | 395                 | 21     |
| Meghalaya         | 0                                  | 32                               | 108              | 700                         | 115                     | 2               | 0             | 44   | 1000  | 467                 | 90     |
| Mizoram           | 0                                  | 10                               | 30               | 630                         | 236                     | 0               | 0             | 94   | 1000  | 119                 | 80     |
| Nagaland          | 0                                  | 11                               | 114              | 675                         | 167                     | 0               | 0             | 33   | 1000  | 109                 | 50     |
| Orissa            | 1                                  | 24                               | 157              | 667                         | 117                     | 9               | 0             | 25   | 1000  | 13371               | 52     |
| Punjab            | 4                                  | 22                               | 105              | 606                         | 211                     | 39              | 0             | 14   | 1000  | 6843                | 25     |
| Rajasthan         | 5                                  | 14                               | 122              | 629                         | 174                     | 35              | 15            | 7    | 1000  | 12196               | 55     |
| Sikkim            | 0                                  | 8                                | 57               | 590                         | 297                     | 17              | 0             | 31   | 1000  | 115                 | 110    |
| Tamil Nadu        | 0                                  | 52                               | 302              | 516                         | 104                     | 27              | 0             | 0    | 1000  | 16961               | 57     |
| Tripura           | 12                                 | 31                               | 217              | 555                         | 142                     | 11              | 0             | 32   | 1000  | 927                 | 17     |
| Uttaranchal       | 0                                  | 44                               | 123              | 543                         | 204                     | 11              | 0             | 76   | 1000  | 2674                | 10     |
| Uttar Pradesh     | 3                                  | 31                               | 115              | 549                         | 224                     | 45              | 3             | 29   | 1000  | 42788               | 182    |
| West Bengal       | 0                                  | 12                               | 108              | 676                         | 158                     | 8               | 9             | 29   | 1000  | 18130               | 680    |
| A & N Islands     | 0                                  | 3                                | 40               | 697                         | 257                     | 4               | 0             | 0    | 1000  | 76                  | 30     |
| Chandigarh        | 0                                  | 51                               | 409              | 349                         | 117                     | 74              | 0             | 0    | 1000  | 7                   | 10     |
| Dadra & N. Haveli | 0                                  | 0                                | 67               | 801                         | 132                     | 0               | 0             | 0    | 1000  | 78                  | 20     |
| Daman & Diu       | 0                                  | 73                               | 158              | 725                         | 0                       | 44              | 0             | 0    | 1000  | 4                   | 0      |
| Lakshadweep       | 0                                  | 0                                | 29               | 574                         | 237                     | 160             | 0             | 0    | 1000  | 7                   | 10     |
| Pondicherry       | 0                                  | 60                               | 358              | 451                         | 130                     | 0               | 0             | 0    | 1000  | 160                 | 20     |

Continued



Table (14): Per 1000 distribution of aged persons by type of living arrangement for each sex and State/UT

| State/ut                      | living arrangement of aged persons |                                  |                  |                             |                         |                 |               |      |        | Males               |        |
|-------------------------------|------------------------------------|----------------------------------|------------------|-----------------------------|-------------------------|-----------------|---------------|------|--------|---------------------|--------|
|                               | living alone                       |                                  | with spouse only | with spouse & other members | without spouse but with |                 |               | n.r. | total  | no. of aged persons |        |
|                               | as an inmate of old age home       | not as an inmate of old age home |                  |                             | children                | other relations | non-relations |      |        | estd. (00)          | sample |
| (1)                           | (2)                                | (3)                              | (4)              | (5)                         | (6)                     | (7)             | (8)           | (9)  | (10)   | (11)                | (12)   |
| INDIA                         | 7                                  | 26                               | 130              | 589                         | 155                     | 7               | 2             | 86   | 1000   | 2371                | 873    |
| UTs                           | 0                                  | 32                               | 208              | 593                         | 160                     | 6               | 0             | 0    | 1000   | 333                 | 114    |
| India                         | 3                                  | 25                               | 162              | 597                         | 168                     | 24              | 3             | 18   | 1000   | 253254              | 11528  |
| std. no. of aged persons (00) | 866                                | 6232                             | 40931            | 151219                      | 42647                   | 6198            | 718           | 4443 | 253254 | X                   | Y      |
| sample aged persons           | 41                                 | 260                              | 1758             | 6940                        | 1971                    | 284             | 36            | 238  | 11528  | X                   | Y      |

1

2

3

4

5

6

7

8

9

10

11

12

13

14

15

16

17

18

19

20

21

22

23

24

25

26

27

28

29

30

31

32

33

34

35

36

37

38

39

40

41

42

43

44

45

46

47

48

49

50

51

52

53

54

55

56

57

58

59

60

Table (14): Per 1000 distribution of aged persons by type of living arrangement for each sex and State/UT

| State/ut          | living arrangement of aged persons |                                  |                  |                             |                         |                 |               |      |       | Females             |        |
|-------------------|------------------------------------|----------------------------------|------------------|-----------------------------|-------------------------|-----------------|---------------|------|-------|---------------------|--------|
|                   | living alone                       |                                  | with spouse only | with spouse & other members | without spouse but with |                 |               | n.r. | total | no. of aged persons |        |
|                   | as an inmate of old age home       | not as an inmate of old age home |                  |                             | children                | other relations | non-relations |      |       | estd. (00)          | sample |
| (1)               | (2)                                | (3)                              | (4)              | (5)                         | (6)                     | (7)             | (8)           | (9)  | (10)  | (11)                | (12)   |
| Andhra Pradesh    | 5                                  | 139                              | 134              | 151                         | 478                     | 80              | 2             | 11   | 1000  | 20035               | 688    |
| Arunachal Pradesh | 0                                  | 50                               | 18               | 338                         | 403                     | 24              | 0             | 167  | 1000  | 204                 | 118    |
| Assam             | 0                                  | 64                               | 32               | 212                         | 626                     | 14              | 0             | 53   | 1000  | 4273                | 323    |
| Bihar             | 15                                 | 38                               | 90               | 390                         | 416                     | 14              | 7             | 30   | 1000  | 15258               | 678    |
| Chhattisgarh      | 43                                 | 75                               | 87               | 212                         | 498                     | 48              | 15            | 22   | 1000  | 6680                | 290    |
| Delhi             | 0                                  | 39                               | 0                | 641                         | 235                     | 85              | 0             | 0    | 1000  | 322                 | 17     |
| Goa               | 0                                  | 5                                | 127              | 329                         | 371                     | 168             | 0             | 0    | 1000  | 615                 | 31     |
| Gujarat           | 3                                  | 85                               | 113              | 282                         | 494                     | 21              | 0             | 1    | 1000  | 10401               | 370    |
| Haryana           | 0                                  | 8                                | 56               | 519                         | 383                     | 20              | 14            | 0    | 1000  | 5510                | 233    |
| Himachal Pradesh  | 3                                  | 37                               | 72               | 240                         | 532                     | 84              | 0             | 32   | 1000  | 2546                | 340    |
| Jammu & Kashmir   | 3                                  | 6                                | 36               | 435                         | 486                     | 27              | 0             | 7    | 1000  | 1555                | 173    |
| Jharkhand         | 14                                 | 34                               | 60               | 360                         | 496                     | 16              | 0             | 20   | 1000  | 4441                | 233    |
| Karnataka         | 0                                  | 97                               | 65               | 195                         | 552                     | 80              | 1             | 9    | 1000  | 10878               | 403    |
| Kerala            | 0                                  | 42                               | 56               | 281                         | 539                     | 60              | 7             | 15   | 1000  | 15013               | 649    |
| Madhya Pradesh    | 21                                 | 62                               | 129              | 294                         | 408                     | 55              | 3             | 28   | 1000  | 14701               | 544    |
| Maharashtra       | 11                                 | 94                               | 97               | 301                         | 415                     | 67              | 6             | 9    | 1000  | 24333               | 710    |
| Manipur           | 0                                  | 11                               | 16               | 297                         | 482                     | 36              | 0             | 157  | 1000  | 279                 | 163    |
| Meghalaya         | 0                                  | 42                               | 88               | 247                         | 547                     | 11              | 0             | 65   | 1000  | 431                 | 93     |
| Mizoram           | 0                                  | 0                                | 5                | 392                         | 429                     | 8               | 18            | 149  | 1000  | 76                  | 48     |
| Nagaland          | 0                                  | 0                                | 164              | 560                         | 276                     | 0               | 0             | 0    | 1000  | 39                  | 24     |
| Narissa           | 4                                  | 40                               | 77               | 300                         | 504                     | 34              | 9             | 31   | 1000  | 12157               | 483    |
| Punjab            | 0                                  | 37                               | 93               | 406                         | 443                     | 19              | 0             | 2    | 1000  | 6518                | 239    |
| Rajasthan         | 6                                  | 39                               | 78               | 312                         | 523                     | 37              | 5             | 0    | 1000  | 12999               | 583    |
| Sikkim            | 25                                 | 0                                | 48               | 344                         | 450                     | 57              | 0             | 76   | 1000  | 109                 | 94     |
| Tamil Nadu        | 0                                  | 194                              | 110              | 204                         | 391                     | 89              | 11            | 0    | 1000  | 17146               | 549    |
| Tripura           | 17                                 | 115                              | 86               | 154                         | 521                     | 78              | 13            | 16   | 1000  | 675                 | 133    |
| Uttaranchal       | 8                                  | 180                              | 86               | 286                         | 399                     | 20              | 10            | 10   | 1000  | 2190                | 90     |
| Uttar Pradesh     | 7                                  | 44                               | 85               | 343                         | 445                     | 39              | 10            | 27   | 1000  | 41298               | 1649   |
| West Bengal       | 2                                  | 55                               | 43               | 174                         | 624                     | 54              | 7             | 40   | 1000  | 18472               | 680    |
| A & N Islands     | 0                                  | 106                              | 10               | 128                         | 489                     | 110             | 0             | 156  | 1000  | 43                  | 13     |
| Chandigarh        | 0                                  | 0                                | 54               | 264                         | 682                     | 0               | 0             | 0    | 1000  | 8                   | 11     |
| Dadra & N. Haveli | 0                                  | 40                               | 57               | 382                         | 521                     | 0               | 0             | 0    | 1000  | 39                  | 10     |
| Daman & Diu       | 0                                  | 381                              | 13               | 97                          | 509                     | 0               | 0             | 0    | 1000  | 13                  | 13     |
| Lakshadweep       | 0                                  | 45                               | 0                | 120                         | 739                     | 96              | 0             | 0    | 1000  | 9                   | 22     |
| Pondicherry       | 0                                  | 64                               | 65               | 143                         | 674                     | 55              | 0             | 0    | 1000  | 148                 | 18     |

Continued

Table (14): Per 1000 distribution of aged persons by type of living arrangement for each sex and State/UT

| State/ut          | living arrangement of aged persons |                                  |                  |                             |                         |                 |               |      |        | Females             |        |
|-------------------|------------------------------------|----------------------------------|------------------|-----------------------------|-------------------------|-----------------|---------------|------|--------|---------------------|--------|
|                   | living alone                       |                                  | with spouse only | with spouse & other members | without spouse but with |                 |               | n.r. | total  | no. of aged persons |        |
|                   | as an inmate of old age home       | not as an inmate of old age home |                  |                             | children                | other relations | non-relations |      |        | estd. (00)          | sample |
| (1)               | (2)                                | (3)                              | (4)              | (5)                         | (6)                     | (7)             | (8)           | (9)  | (10)   | (11)                | (12)   |
| ANDHRA PRADESH    | 8                                  | 60                               | 64               | 249                         | 494                     | 44              | 6             | 75   | 1000   | 1813                | 67     |
| ARUNACHAL PRADESH | 0                                  | 81                               | 50               | 177                         | 614                     | 53              | 0             | 26   | 1000   | 261                 | 8      |
| ASSAM             | 7                                  | 73                               | 87               | 284                         | 475                     | 50              | 6             | 19   | 1000   | 249416              | 1073   |
| Andhra Pradesh    | 1768                               | 18134                            | 21731            | 70710                       | 118353                  | 12487           | 1607          | 4624 | 249416 | X                   | λ      |
| Assam             | 65                                 | 662                              | 959              | 3180                        | 5077                    | 500             | 49            | 245  | 10737  | X                   | λ      |

1

2

3

4

5

6

7

8

9

10

11

12

13

14

15

16

17

18

19

20

21

22

23

24

25

26

27

28

29

30

31

32

33

34

35

36

37

38

39

40

41

42

43

44

45

46

47

48

49

50

51

52

53

54

55

56

57

58

59

60

Table (14): Per 1000 distribution of aged persons by type of living arrangement for each sex and State/UT

| State/ut           | living arrangement of aged persons |                                  |                  |                             |                         |                 |               |      |       | Persons             |        |
|--------------------|------------------------------------|----------------------------------|------------------|-----------------------------|-------------------------|-----------------|---------------|------|-------|---------------------|--------|
|                    | living alone                       |                                  | with spouse only | with spouse & other members | without spouse but with |                 |               | n.r. | total | no. of aged persons |        |
|                    | as an inmate of old age home       | not as an inmate of old age home |                  |                             | children                | other relations | non-relations |      |       | estd. (00)          | sample |
| (1)                | (2)                                | (3)                              | (4)              | (5)                         | (6)                     | (7)             | (8)           | (9)  | (10)  | (11)                | (12)   |
| Andhra Pradesh     | 3                                  | 89                               | 226              | 309                         | 314                     | 47              | 1             | 11   | 1000  | 38765               | 1384   |
| Arunachal Pradesh  | 0                                  | 34                               | 32               | 457                         | 253                     | 11              | 0             | 212  | 1000  | 442                 | 258    |
| Assam              | 0                                  | 28                               | 38               | 518                         | 355                     | 11              | 1             | 50   | 1000  | 10376               | 794    |
| Bihar              | 13                                 | 27                               | 123              | 506                         | 293                     | 10              | 4             | 24   | 1000  | 34119               | 1590   |
| Chhattisgarh       | 35                                 | 50                               | 125              | 334                         | 378                     | 34              | 18            | 26   | 1000  | 11289               | 494    |
| Delhi              | 0                                  | 19                               | 0                | 701                         | 173                     | 107             | 0             | 0    | 1000  | 661                 | 33     |
| Goa                | 0                                  | 3                                | 192              | 477                         | 216                     | 113             | 0             | 0    | 1000  | 1121                | 51     |
| Gujarat            | 2                                  | 62                               | 148              | 417                         | 350                     | 17              | 0             | 3    | 1000  | 20859               | 721    |
| Haryana            | 0                                  | 4                                | 63               | 608                         | 295                     | 21              | 7             | 1    | 1000  | 11118               | 484    |
| Himachal Pradesh   | 3                                  | 39                               | 101              | 413                         | 362                     | 51              | 6             | 26   | 1000  | 4946                | 693    |
| Jammu & Kashmir    | 1                                  | 2                                | 36               | 591                         | 322                     | 30              | 1             | 16   | 1000  | 3801                | 403    |
| Jharkhand          | 6                                  | 30                               | 111              | 465                         | 344                     | 26              | 1             | 18   | 1000  | 10841               | 561    |
| Karnataka          | 1                                  | 57                               | 103              | 448                         | 334                     | 52              | 1             | 5    | 1000  | 22520               | 831    |
| Kerala             | 0                                  | 29                               | 87               | 463                         | 363                     | 44              | 5             | 9    | 1000  | 26687               | 1154   |
| Madhya Pradesh     | 16                                 | 41                               | 160              | 419                         | 285                     | 49              | 3             | 26   | 1000  | 29367               | 1093   |
| Maharashtra        | 6                                  | 58                               | 139              | 469                         | 272                     | 44              | 3             | 7    | 1000  | 47679               | 1433   |
| Manipur            | 8                                  | 17                               | 41               | 426                         | 304                     | 20              | 6             | 177  | 1000  | 673                 | 374    |
| Meghalaya          | 0                                  | 37                               | 98               | 483                         | 322                     | 6               | 0             | 54   | 1000  | 898                 | 191    |
| Mizoram            | 0                                  | 6                                | 20               | 538                         | 311                     | 3               | 7             | 115  | 1000  | 196                 | 131    |
| Nagaland           | 0                                  | 8                                | 127              | 645                         | 196                     | 0               | 0             | 24   | 1000  | 148                 | 80     |
| Narissa            | 2                                  | 32                               | 119              | 492                         | 301                     | 21              | 4             | 28   | 1000  | 25527               | 1008   |
| Punjab             | 2                                  | 29                               | 99               | 509                         | 324                     | 29              | 0             | 8    | 1000  | 13361               | 497    |
| Rajasthan          | 6                                  | 27                               | 99               | 465                         | 354                     | 36              | 10            | 3    | 1000  | 25196               | 1133   |
| Sikkim             | 12                                 | 4                                | 53               | 470                         | 371                     | 36              | 0             | 53   | 1000  | 224                 | 204    |
| Tamil Nadu         | 0                                  | 123                              | 205              | 359                         | 248                     | 58              | 6             | 0    | 1000  | 34107               | 1120   |
| Tripura            | 14                                 | 67                               | 162              | 386                         | 302                     | 39              | 6             | 25   | 1000  | 1602                | 300    |
| Uttaranchal        | 4                                  | 105                              | 106              | 427                         | 292                     | 15              | 5             | 46   | 1000  | 4865                | 191    |
| Uttar Pradesh      | 5                                  | 37                               | 101              | 448                         | 333                     | 42              | 6             | 28   | 1000  | 84086               | 3474   |
| West Bengal        | 1                                  | 34                               | 75               | 423                         | 393                     | 31              | 8             | 34   | 1000  | 36602               | 1360   |
| A & N Islands      | 0                                  | 40                               | 29               | 491                         | 341                     | 42              | 0             | 56   | 1000  | 120                 | 49     |
| Chandigarh         | 0                                  | 24                               | 219              | 304                         | 419                     | 35              | 0             | 0    | 1000  | 16                  | 28     |
| Andhra & N. Haveli | 0                                  | 13                               | 63               | 662                         | 261                     | 0               | 0             | 0    | 1000  | 117                 | 30     |
| Daman & Diu        | 0                                  | 309                              | 47               | 243                         | 390                     | 10              | 0             | 0    | 1000  | 17                  | 20     |
| Lakshadweep        | 0                                  | 25                               | 13               | 322                         | 516                     | 124             | 0             | 0    | 1000  | 16                  | 38     |
| Chennai            | 0                                  | 62                               | 217              | 303                         | 391                     | 26              | 0             | 0    | 1000  | 309                 | 38     |

Continued

1  
2  
3  
4  
5  
6  
7  
8  
9  
10  
11  
12  
13  
14  
15  
16  
17  
18  
19  
20  
21  
22  
23  
24  
25  
26  
27  
28  
29  
30  
31  
32  
33  
34  
35  
36  
37  
38  
39  
40  
41  
42  
43  
44  
45  
46  
47  
48  
49  
50  
51  
52  
53  
54  
55  
56  
57  
58  
59  
60

Table (14): Per 1000 distribution of aged persons by type of living arrangement for each sex and State/UT

| State/ut                      | living arrangement of aged persons |                                  |                  |                             |                         |                 |               |      |        | Persons             |        |
|-------------------------------|------------------------------------|----------------------------------|------------------|-----------------------------|-------------------------|-----------------|---------------|------|--------|---------------------|--------|
|                               | living alone                       |                                  | with spouse only | with spouse & other members | without spouse but with |                 |               | n.r. | total  | no. of aged persons |        |
|                               | as an inmate of old age home       | not as an inmate of old age home |                  |                             | children                | other relations | non-relations |      |        | estd. (00)          | sample |
| (1)                           | (2)                                | (3)                              | (4)              | (5)                         | (6)                     | (7)             | (8)           | (9)  | (10)   | (11)                | (12)   |
| Andhra Pradesh                | 7                                  | 41                               | 101              | 441                         | 302                     | 23              | 3             | 81   | 1000   | 4184                | 1550   |
| Goa                           | 0                                  | 53                               | 139              | 410                         | 360                     | 27              | 0             | 11   | 1000   | 594                 | 203    |
| Haryana                       | 5                                  | 48                               | 125              | 442                         | 320                     | 37              | 5             | 18   | 1000   | 502670              | 2226   |
| std. no. of aged persons (00) | 2634                               | 24366                            | 62662            | 221929                      | 161000                  | 18685           | 2325          | 9067 | 502670 | X                   | λ      |
| sample aged persons           | 106                                | 922                              | 2717             | 10120                       | 7048                    | 784             | 85            | 483  | 22265  | X                   | λ      |

1

2

3

4 Table (14): Per 1000 distribution of aged persons by type of living arrangement for each sex and State/UT

5 Urban

| 6 State/ut           | 7 living arrangement of aged persons |                                     |                     |                                |                            |                    |                  |         |          | 8 Males                |             |
|----------------------|--------------------------------------|-------------------------------------|---------------------|--------------------------------|----------------------------|--------------------|------------------|---------|----------|------------------------|-------------|
|                      | 9 living alone                       |                                     | 10 with spouse only | 11 with spouse & other members | 12 without spouse but with |                    |                  | 13 n.r. | 14 total | 15 no. of aged persons |             |
|                      | 16 as an inmate of old age home      | 17 not as an inmate of old age home |                     |                                | 18 children                | 19 other relations | 20 non-relations |         |          | 21 estd. (00)          | 22 sam- ple |
| 23 (1)               | 24 (2)                               | 25 (3)                              | 26 (4)              | 27 (5)                         | 28 (6)                     | 29 (7)             | 30 (8)           | 31 (9)  | 32 (10)  | 33 (11)                | 34 (12)     |
| 35 Andhra Pradesh    | 7                                    | 20                                  | 215                 | 579                            | 150                        | 24                 | 1                | 3       | 1000     | 5310                   | 37          |
| 36 Arunachal Pradesh | 0                                    | 25                                  | 57                  | 281                            | 324                        | 41                 | 0                | 270     | 1000     | 10                     | 4           |
| 37 Assam             | 10                                   | 0                                   | 25                  | 800                            | 141                        | 18                 | 3                | 2       | 1000     | 647                    | 10          |
| 38 Bihar             | 0                                    | 7                                   | 55                  | 610                            | 248                        | 3                  | 8                | 69      | 1000     | 2455                   | 16          |
| 39 Chhattisgarh      | 0                                    | 12                                  | 37                  | 711                            | 240                        | 0                  | 0                | 0       | 1000     | 641                    | 6           |
| 40 Delhi             | 2                                    | 16                                  | 125                 | 646                            | 188                        | 6                  | 4                | 14      | 1000     | 2212                   | 21          |
| 41 Goa               | 0                                    | 49                                  | 54                  | 683                            | 96                         | 119                | 0                | 0       | 1000     | 229                    | 3           |
| 42 Gujarat           | 0                                    | 9                                   | 139                 | 710                            | 136                        | 7                  | 0                | 0       | 1000     | 4592                   | 29          |
| 43 Haryana           | 0                                    | 0                                   | 137                 | 663                            | 180                        | 0                  | 13               | 6       | 1000     | 1315                   | 13          |
| 44 Himachal Pradesh  | 0                                    | 0                                   | 149                 | 634                            | 168                        | 49                 | 0                | 0       | 1000     | 139                    | 4           |
| 45 Jammu & Kashmir   | 0                                    | 4                                   | 133                 | 655                            | 183                        | 3                  | 16               | 7       | 1000     | 408                    | 10          |
| 46 Jharkhand         | 6                                    | 37                                  | 44                  | 712                            | 159                        | 5                  | 0                | 37      | 1000     | 1372                   | 16          |
| 47 Karnataka         | 0                                    | 8                                   | 96                  | 729                            | 141                        | 16                 | 0                | 9       | 1000     | 4025                   | 34          |
| 48 Kerala            | 0                                    | 7                                   | 168                 | 695                            | 93                         | 30                 | 6                | 1       | 1000     | 3986                   | 29          |
| 49 Madhya Pradesh    | 10                                   | 10                                  | 103                 | 649                            | 169                        | 35                 | 3                | 21      | 1000     | 4115                   | 31          |
| 50 Maharashtra       | 0                                    | 17                                  | 130                 | 653                            | 176                        | 13                 | 2                | 8       | 1000     | 12844                  | 59          |
| 51 Manipur           | 2                                    | 0                                   | 66                  | 703                            | 75                         | 48                 | 0                | 105     | 1000     | 192                    | 11          |
| 52 Meghalaya         | 0                                    | 0                                   | 56                  | 775                            | 141                        | 0                  | 27               | 0       | 1000     | 42                     | 3           |
| 53 Mizoram           | 0                                    | 6                                   | 51                  | 537                            | 164                        | 29                 | 0                | 213     | 1000     | 85                     | 14          |
| 54 Nagaland          | 0                                    | 0                                   | 0                   | 982                            | 18                         | 0                  | 0                | 0       | 1000     | 68                     | 2           |
| 55 Orissa            | 0                                    | 12                                  | 166                 | 650                            | 133                        | 9                  | 3                | 28      | 1000     | 1546                   | 14          |
| 56 Punjab            | 6                                    | 15                                  | 96                  | 732                            | 109                        | 15                 | 2                | 25      | 1000     | 2565                   | 16          |
| 57 Rajasthan         | 2                                    | 22                                  | 112                 | 643                            | 190                        | 19                 | 10               | 2       | 1000     | 3012                   | 27          |
| 58 Sikkim            | 0                                    | 0                                   | 0                   | 735                            | 97                         | 142                | 26               | 0       | 1000     | 11                     | 1           |
| 59 Tamil Nadu        | 8                                    | 27                                  | 221                 | 587                            | 121                        | 33                 | 3                | 0       | 1000     | 7955                   | 58          |
| 60 Tripura           | 0                                    | 40                                  | 122                 | 786                            | 52                         | 0                  | 0                | 0       | 1000     | 130                    | 4           |
| 61 Uttarakhand       | 0                                    | 0                                   | 200                 | 586                            | 202                        | 13                 | 0                | 0       | 1000     | 558                    | 4           |
| 62 Uttar Pradesh     | 0                                    | 33                                  | 112                 | 601                            | 203                        | 16                 | 11               | 24      | 1000     | 9104                   | 62          |
| 63 West Bengal       | 0                                    | 27                                  | 106                 | 664                            | 102                        | 72                 | 8                | 21      | 1000     | 8725                   | 52          |
| 64 A & N Islands     | 0                                    | 0                                   | 0                   | 750                            | 183                        | 0                  | 0                | 67      | 1000     | 18                     | 1           |
| 65 Chandigarh        | 9                                    | 21                                  | 168                 | 593                            | 137                        | 61                 | 11               | 0       | 1000     | 197                    | 6           |
| 66 Dadra & N. Haveli | 0                                    | 0                                   | 131                 | 668                            | 201                        | 0                  | 0                | 0       | 1000     | 4                      | 1           |
| 67 Daman & Diu       | 0                                    | 94                                  | 74                  | 648                            | 118                        | 67                 | 0                | 0       | 1000     | 10                     | 1           |
| 68 Lakshadweep       | 0                                    | 0                                   | 103                 | 620                            | 138                        | 140                | 0                | 0       | 1000     | 8                      | 2           |
| 69 Pondicherry       | 0                                    | 13                                  | 195                 | 625                            | 132                        | 35                 | 0                | 0       | 1000     | 218                    | 4           |

Continued

Table (14): Per 1000 distribution of aged persons by type of living arrangement for each sex and State/UT

| State/UT                      | living arrangement of aged persons |                                  |                  |                             |                         |                 |               |      |       | Males               |        |
|-------------------------------|------------------------------------|----------------------------------|------------------|-----------------------------|-------------------------|-----------------|---------------|------|-------|---------------------|--------|
|                               | living alone                       |                                  | with spouse only | with spouse & other members | without spouse but with |                 |               | n.r. | total | no. of aged persons |        |
|                               | as an inmate of old age home       | not as an inmate of old age home |                  |                             | children                | other relations | non-relations |      |       | estd. (00)          | sample |
| (1)                           | (2)                                | (3)                              | (4)              | (5)                         | (6)                     | (7)             | (8)           | (9)  | (10)  | (11)                | (12)   |
| INDIA                         | 1                                  | 11                               | 66               | 731                         | 87                      | 25              | 3             | 76   | 1000  | 538                 | 419    |
| UTs                           | 4                                  | 17                               | 171              | 617                         | 137                     | 47              | 5             | 3    | 1000  | 455                 | 182    |
| India                         | 2                                  | 19                               | 133              | 649                         | 154                     | 24              | 5             | 14   | 1000  | 78751               | 6222   |
| std. no. of aged persons (00) | 187                                | 1484                             | 10479            | 51120                       | 12138                   | 1911            | 365           | 1067 | 78751 | X                   | Y      |
| sample aged persons           | 15                                 | 121                              | 741              | 4102                        | 930                     | 169             | 34            | 110  | 6222  | X                   | Y      |



1

2

3

4

5

6

7

8

9

10

11

12

13

14

15

16

17

18

19

20

21

22

23

24

25

26

27

28

29

30

31

32

33

34

35

36

37

38

39

40

41

42

43

44

45

46

47

48

49

50

51

52

53

54

55

56

57

58

59

60

Table (14): Per 1000 distribution of aged persons by type of living arrangement for each sex and State/UT

| State/ut          | living arrangement of aged persons |                                  |                  |                             |                         |                 |               |      | no. of aged persons |            |        |
|-------------------|------------------------------------|----------------------------------|------------------|-----------------------------|-------------------------|-----------------|---------------|------|---------------------|------------|--------|
|                   | living alone                       |                                  | with spouse only | with spouse & other members | without spouse but with |                 |               | n.r. | total               | estd. (00) | sample |
|                   | as an inmate of old age home       | not as an inmate of old age home |                  |                             | children                | other relations | non-relations |      |                     |            |        |
| (1)               | (2)                                | (3)                              | (4)              | (5)                         | (6)                     | (7)             | (8)           | (9)  | (10)                | (11)       | (12)   |
| Andhra Pradesh    | 5                                  | 86                               | 95               | 194                         | 537                     | 66              | 1             | 16   | 1000                | 6160       | 42     |
| Arunachal Pradesh | 50                                 | 20                               | 77               | 415                         | 331                     | 0               | 0             | 107  | 1000                | 7          | 30     |
| Assam             | 0                                  | 0                                | 0                | 328                         | 544                     | 17              | 13            | 98   | 1000                | 532        | 8      |
| Bihar             | 14                                 | 33                               | 87               | 431                         | 359                     | 27              | 4             | 43   | 1000                | 1829       | 14     |
| Chhattisgarh      | 33                                 | 135                              | 11               | 247                         | 469                     | 105             | 0             | 0    | 1000                | 760        | 8      |
| Delhi             | 0                                  | 59                               | 83               | 362                         | 463                     | 19              | 2             | 11   | 1000                | 2129       | 20     |
| Goa               | 0                                  | 177                              | 48               | 235                         | 423                     | 116             | 0             | 0    | 1000                | 256        | 40     |
| Gujarat           | 0                                  | 70                               | 89               | 301                         | 487                     | 44              | 0             | 9    | 1000                | 5101       | 31     |
| Haryana           | 3                                  | 58                               | 87               | 343                         | 459                     | 15              | 2             | 32   | 1000                | 1725       | 14     |
| Himachal Pradesh  | 0                                  | 0                                | 61               | 236                         | 680                     | 14              | 0             | 10   | 1000                | 155        | 50     |
| Jammu & Kashmir   | 0                                  | 24                               | 117              | 325                         | 522                     | 0               | 0             | 12   | 1000                | 336        | 9      |
| Jharkhand         | 3                                  | 28                               | 39               | 365                         | 482                     | 21              | 8             | 54   | 1000                | 1292       | 13     |
| Karnataka         | 0                                  | 72                               | 31               | 209                         | 612                     | 65              | 6             | 5    | 1000                | 4073       | 35     |
| Kerala            | 0                                  | 59                               | 64               | 201                         | 539                     | 116             | 5             | 16   | 1000                | 4686       | 32     |
| Madhya Pradesh    | 8                                  | 57                               | 52               | 313                         | 462                     | 75              | 1             | 33   | 1000                | 4466       | 32     |
| Maharashtra       | 2                                  | 65                               | 83               | 303                         | 482                     | 49              | 4             | 10   | 1000                | 13669      | 67     |
| Manipur           | 0                                  | 49                               | 0                | 348                         | 428                     | 42              | 0             | 134  | 1000                | 178        | 11     |
| Meghalaya         | 0                                  | 69                               | 50               | 82                          | 782                     | 7               | 0             | 9    | 1000                | 48         | 40     |
| Mizoram           | 0                                  | 16                               | 7                | 348                         | 363                     | 162             | 0             | 105  | 1000                | 60         | 10     |
| Nagaland          | 0                                  | 0                                | 0                | 888                         | 112                     | 0               | 0             | 0    | 1000                | 8          | 3      |
| Narissa           | 7                                  | 31                               | 59               | 388                         | 434                     | 32              | 8             | 40   | 1000                | 1182       | 11     |
| Punjab            | 0                                  | 25                               | 68               | 497                         | 387                     | 13              | 0             | 10   | 1000                | 2347       | 16     |
| Rajasthan         | 0                                  | 61                               | 81               | 353                         | 468                     | 36              | 0             | 0    | 1000                | 3076       | 26     |
| Sikkim            | 0                                  | 0                                | 0                | 359                         | 641                     | 0               | 0             | 0    | 1000                | 7          | 1      |
| Tamil Nadu        | 0                                  | 120                              | 99               | 199                         | 480                     | 97              | 3             | 0    | 1000                | 8984       | 65     |
| Tripura           | 0                                  | 39                               | 31               | 364                         | 478                     | 73              | 0             | 16   | 1000                | 136        | 5      |
| Uttaranchal       | 0                                  | 43                               | 98               | 236                         | 582                     | 10              | 0             | 32   | 1000                | 693        | 4      |
| Uttar Pradesh     | 13                                 | 21                               | 79               | 363                         | 440                     | 54              | 9             | 21   | 1000                | 9590       | 62     |
| West Bengal       | 3                                  | 34                               | 61               | 308                         | 462                     | 97              | 16            | 18   | 1000                | 8315       | 50     |
| A & N Islands     | 0                                  | 12                               | 0                | 502                         | 342                     | 95              | 0             | 49   | 1000                | 15         | 2      |
| Chandigarh        | 0                                  | 96                               | 206              | 288                         | 384                     | 8               | 8             | 10   | 1000                | 147        | 6      |
| Dadra & N. Haveli | 0                                  | 0                                | 22               | 115                         | 770                     | 94              | 0             | 0    | 1000                | 3          | 1      |
| Daman & Diu       | 0                                  | 180                              | 0                | 183                         | 595                     | 0               | 0             | 42   | 1000                | 16         | 2      |
| Lakshadweep       | 0                                  | 74                               | 81               | 141                         | 606                     | 98              | 0             | 0    | 1000                | 10         | 2      |
| Pondicherry       | 0                                  | 87                               | 67               | 227                         | 598                     | 22              | 0             | 0    | 1000                | 368        | 5      |

Continued

Table (14): Per 1000 distribution of aged persons by type of living arrangement for each sex and State/UT

| State/ut                      | living arrangement of aged persons |                                  |                  |                             |                         |                 |               |      | no. of aged persons |            |        |
|-------------------------------|------------------------------------|----------------------------------|------------------|-----------------------------|-------------------------|-----------------|---------------|------|---------------------|------------|--------|
|                               | living alone                       |                                  | with spouse only | with spouse & other members | without spouse but with |                 |               | n.r. | total               | estd. (00) | sample |
|                               | as an inmate of old age home       | not as an inmate of old age home |                  |                             | children                | other relations | non-relations |      |                     |            |        |
| (1)                           | (2)                                | (3)                              | (4)              | (5)                         | (6)                     | (7)             | (8)           | (9)  | (10)                | (11)       | (12)   |
| INDIA                         | 1                                  | 42                               | 17               | 335                         | 469                     | 62              | 0             | 75   | 1000                | 444        | 36     |
| UTs                           | 0                                  | 89                               | 100              | 247                         | 536                     | 22              | 2             | 5    | 1000                | 560        | 20     |
| India                         | 4                                  | 61                               | 75               | 294                         | 482                     | 62              | 5             | 16   | 1000                | 82359      | 634    |
| std. no. of aged persons (00) | 324                                | 5033                             | 6208             | 24252                       | 39710                   | 5123            | 412           | 1297 | 82359               | X          | λ      |
| sample aged persons           | 19                                 | 326                              | 417              | 1905                        | 3148                    | 368             | 27            | 134  | 6344                | X          | λ      |

1  
2

3 Table (14): Per 1000 distribution of aged persons by type of living arrangement for each sex and State/UT

4 Urban

| 5 State/ut           | 6 living arrangement of aged persons |                                     |                    |                               |                            |                    |                  |         |          | Persons                |             |
|----------------------|--------------------------------------|-------------------------------------|--------------------|-------------------------------|----------------------------|--------------------|------------------|---------|----------|------------------------|-------------|
|                      | 7 living alone                       |                                     | 8 with spouse only | 9 with spouse & other members | 10 without spouse but with |                    |                  | 11 n.r. | 12 total | 13 no. of aged persons |             |
|                      | 14 as an inmate of old age home      | 15 not as an inmate of old age home |                    |                               | 16 children                | 17 other relations | 18 non-relations |         |          | 19 estd. (00)          | 20 sam- ple |
| 21                   | (2)                                  | (3)                                 | (4)                | (5)                           | (6)                        | (7)                | (8)              | (9)     | (10)     | (11)                   | (12)        |
| 22 Andhra Pradesh    | 6                                    | 56                                  | 151                | 372                           | 358                        | 47                 | 1                | 10      | 1000     | 11470                  | 798         |
| 23 Arunachal Pradesh | 21                                   | 23                                  | 65                 | 336                           | 327                        | 24                 | 0                | 203     | 1000     | 17                     | 72          |
| 24 Assam             | 6                                    | 0                                   | 14                 | 587                           | 323                        | 18                 | 7                | 45      | 1000     | 1180                   | 194         |
| 25 Bihar             | 6                                    | 18                                  | 69                 | 534                           | 295                        | 13                 | 6                | 58      | 1000     | 4283                   | 314         |
| 26 Chhattisgarh      | 18                                   | 79                                  | 23                 | 459                           | 364                        | 57                 | 0                | 0       | 1000     | 1401                   | 151         |
| 27 Delhi             | 1                                    | 37                                  | 105                | 507                           | 323                        | 13                 | 3                | 12      | 1000     | 4342                   | 418         |
| 28 Goa               | 0                                    | 116                                 | 51                 | 446                           | 269                        | 118                | 0                | 0       | 1000     | 485                    | 72          |
| 29 Gujarat           | 0                                    | 41                                  | 112                | 495                           | 321                        | 27                 | 0                | 5       | 1000     | 9693                   | 610         |
| 30 Haryana           | 2                                    | 33                                  | 109                | 482                           | 338                        | 9                  | 7                | 21      | 1000     | 3040                   | 275         |
| 31 Himachal Pradesh  | 0                                    | 0                                   | 103                | 425                           | 437                        | 30                 | 0                | 5       | 1000     | 294                    | 95          |
| 32 Jammu & Kashmir   | 0                                    | 13                                  | 126                | 506                           | 336                        | 1                  | 9                | 9       | 1000     | 744                    | 195         |
| 33 Jharkhand         | 4                                    | 33                                  | 41                 | 544                           | 316                        | 13                 | 4                | 45      | 1000     | 2664                   | 305         |
| 34 Karnataka         | 0                                    | 40                                  | 63                 | 468                           | 378                        | 41                 | 3                | 7       | 1000     | 8098                   | 698         |
| 35 Kerala            | 0                                    | 35                                  | 112                | 428                           | 334                        | 76                 | 6                | 9       | 1000     | 8672                   | 612         |
| 36 Madhya Pradesh    | 9                                    | 34                                  | 77                 | 474                           | 321                        | 56                 | 2                | 28      | 1000     | 8580                   | 640         |
| 37 Maharashtra       | 1                                    | 42                                  | 106                | 473                           | 334                        | 31                 | 3                | 9       | 1000     | 26513                  | 1268        |
| 38 Manipur           | 1                                    | 24                                  | 34                 | 532                           | 245                        | 45                 | 0                | 119     | 1000     | 369                    | 231         |
| 39 Meghalaya         | 0                                    | 37                                  | 53                 | 408                           | 480                        | 4                  | 13               | 5       | 1000     | 90                     | 80          |
| 40 Mizoram           | 0                                    | 10                                  | 32                 | 458                           | 247                        | 84                 | 0                | 168     | 1000     | 145                    | 240         |
| 41 Nagaland          | 0                                    | 0                                   | 0                  | 973                           | 27                         | 0                  | 0                | 0       | 1000     | 76                     | 25          |
| 42 Orissa            | 3                                    | 20                                  | 120                | 536                           | 263                        | 19                 | 5                | 33      | 1000     | 2729                   | 261         |
| 43 Punjab            | 3                                    | 20                                  | 83                 | 619                           | 242                        | 14                 | 1                | 18      | 1000     | 4912                   | 325         |
| 44 Rajasthan         | 1                                    | 42                                  | 96                 | 497                           | 331                        | 28                 | 5                | 1       | 1000     | 6088                   | 531         |
| 45 Sikkim            | 0                                    | 0                                   | 0                  | 584                           | 315                        | 85                 | 16               | 0       | 1000     | 18                     | 25          |
| 46 Tamil Nadu        | 4                                    | 77                                  | 157                | 381                           | 312                        | 67                 | 3                | 0       | 1000     | 16939                  | 1231        |
| 47 Tripura           | 0                                    | 39                                  | 75                 | 570                           | 270                        | 37                 | 0                | 8       | 1000     | 267                    | 95          |
| 48 Uttarakhand       | 0                                    | 24                                  | 143                | 392                           | 412                        | 11                 | 0                | 18      | 1000     | 1252                   | 98          |
| 49 Uttar Pradesh     | 7                                    | 27                                  | 95                 | 479                           | 325                        | 35                 | 10               | 22      | 1000     | 18694                  | 1241        |
| 50 West Bengal       | 2                                    | 31                                  | 84                 | 490                           | 278                        | 84                 | 12               | 20      | 1000     | 17040                  | 1028        |
| 51 A & N Islands     | 0                                    | 6                                   | 0                  | 637                           | 255                        | 43                 | 0                | 59      | 1000     | 33                     | 40          |
| 52 Chandigarh        | 5                                    | 53                                  | 184                | 463                           | 243                        | 38                 | 10               | 4       | 1000     | 344                    | 131         |
| 53 Dadra & N. Haveli | 0                                    | 0                                   | 79                 | 407                           | 469                        | 44                 | 0                | 0       | 1000     | 7                      | 27          |
| 54 Daman & Diu       | 0                                    | 147                                 | 28                 | 362                           | 412                        | 26                 | 0                | 26      | 1000     | 26                     | 38          |
| 55 Lakshadweep       | 0                                    | 41                                  | 91                 | 352                           | 399                        | 116                | 0                | 0       | 1000     | 19                     | 42          |
| 56 Pondicherry       | 0                                    | 59                                  | 114                | 375                           | 424                        | 27                 | 0                | 0       | 1000     | 586                    | 105         |

Continued

Table (14): Per 1000 distribution of aged persons by type of living arrangement for each sex and State/UT

| State/ut                      | living arrangement of aged persons |                                  |                  |                             |                         |                 |               |      |        | Persons             |        |
|-------------------------------|------------------------------------|----------------------------------|------------------|-----------------------------|-------------------------|-----------------|---------------|------|--------|---------------------|--------|
|                               | living alone                       |                                  | with spouse only | with spouse & other members | without spouse but with |                 |               | n.r. | total  | no. of aged persons |        |
|                               | as an inmate of old age home       | not as an inmate of old age home |                  |                             | children                | other relations | non-relations |      |        | estd. (00)          | sample |
| (1)                           | (2)                                | (3)                              | (4)              | (5)                         | (6)                     | (7)             | (8)           | (9)  | (10)   | (11)                | (12)   |
| INDIA                         | 1                                  | 25                               | 44               | 552                         | 259                     | 42              | 1             | 76   | 1000   | 983                 | 786    |
| UTs                           | 2                                  | 57                               | 131              | 413                         | 357                     | 33              | 3             | 4    | 1000   | 1015                | 396    |
| India                         | 3                                  | 40                               | 104              | 468                         | 322                     | 44              | 5             | 15   | 1000   | 161110              | 12566  |
| std. no. of aged persons (00) | 511                                | 6517                             | 16687            | 75372                       | 51848                   | 7034            | 777           | 2365 | 161110 | X                   | Y      |
| sample aged persons           | 34                                 | 447                              | 1158             | 6007                        | 4078                    | 537             | 61            | 244  | 12566  | X                   | Y      |

1  
2

Table (14): Per 1000 distribution of aged persons by type of living arrangement for each sex and State/UT

Rural+Urban

Males

| State/ut             | living arrangement of aged persons |                                  |                  |                             |                         |                 |               |      |       | no. of aged persons |        |
|----------------------|------------------------------------|----------------------------------|------------------|-----------------------------|-------------------------|-----------------|---------------|------|-------|---------------------|--------|
|                      | living alone                       |                                  | with spouse only | with spouse & other members | without spouse but with |                 |               | n.r. | total | estd. (00)          | sample |
|                      | as an inmate of old age home       | not as an inmate of old age home |                  |                             | children                | other relations | non-relations |      |       |                     |        |
| (1)                  | (2)                                | (3)                              | (4)              | (5)                         | (6)                     | (7)             | (8)           | (9)  | (10)  | (11)                | (12)   |
| 1 Andhra Pradesh     | 3                                  | 32                               | 300              | 501                         | 141                     | 14              | 1             | 8    | 1000  | 24041               | 1072   |
| 18 Arunachal Pradesh | 0                                  | 21                               | 45               | 548                         | 133                     | 2               | 0             | 251  | 1000  | 248                 | 182    |
| 19 Assam             | 1                                  | 3                                | 40               | 739                         | 163                     | 10              | 1             | 43   | 1000  | 6750                | 582    |
| 20 Bihar             | 11                                 | 17                               | 138              | 600                         | 199                     | 7               | 3             | 25   | 1000  | 21316               | 1082   |
| 22 Chhattisgarh      | 21                                 | 13                               | 164              | 535                         | 208                     | 11              | 19            | 29   | 1000  | 5250                | 262    |
| 23 Delhi             | 1                                  | 14                               | 109              | 661                         | 178                     | 23              | 3             | 12   | 1000  | 2551                | 222    |
| 24 Goa               | 0                                  | 15                               | 203              | 665                         | 49                      | 69              | 0             | 0    | 1000  | 735                 | 52     |
| 26 Gujarat           | 0                                  | 31                               | 169              | 600                         | 185                     | 12              | 0             | 4    | 1000  | 15050               | 642    |
| 27 Haryana           | 0                                  | 0                                | 83               | 690                         | 203                     | 18              | 3             | 2    | 1000  | 6923                | 382    |
| 28 Himachal Pradesh  | 2                                  | 38                               | 133              | 598                         | 180                     | 18              | 12            | 18   | 1000  | 2539                | 392    |
| 29 Jammu & Kashmir   | 0                                  | 1                                | 50               | 692                         | 204                     | 28              | 4             | 20   | 1000  | 2654                | 332    |
| 31 Jharkhand         | 2                                  | 29                               | 128              | 568                         | 224                     | 28              | 1             | 20   | 1000  | 7772                | 492    |
| 32 Karnataka         | 1                                  | 16                               | 128              | 696                         | 132                     | 24              | 0             | 3    | 1000  | 15667               | 772    |
| 33 Kerala            | 0                                  | 11                               | 137              | 697                         | 126                     | 24              | 2             | 2    | 1000  | 15659               | 792    |
| 34 Madhya Pradesh    | 12                                 | 18                               | 171              | 568                         | 163                     | 42              | 3             | 24   | 1000  | 18781               | 862    |
| 36 Maharashtra       | 1                                  | 20                               | 165              | 647                         | 142                     | 18              | 1             | 6    | 1000  | 36191               | 1312   |
| 37 Manipur           | 10                                 | 14                               | 61               | 577                         | 145                     | 22              | 7             | 163  | 1000  | 587                 | 322    |
| 38 Meghalaya         | 0                                  | 29                               | 103              | 706                         | 117                     | 1               | 2             | 40   | 1000  | 510                 | 132    |
| 40 Mizoram           | 0                                  | 8                                | 38               | 592                         | 206                     | 12              | 0             | 143  | 1000  | 204                 | 232    |
| 41 Nagaland          | 0                                  | 7                                | 70               | 793                         | 109                     | 0               | 0             | 20   | 1000  | 178                 | 82     |
| 42 Orissa            | 1                                  | 23                               | 158              | 665                         | 119                     | 9               | 0             | 25   | 1000  | 14917               | 672    |
| 43 Punjab            | 5                                  | 20                               | 102              | 641                         | 183                     | 32              | 1             | 17   | 1000  | 9408                | 422    |
| 45 Rajasthan         | 4                                  | 16                               | 120              | 632                         | 177                     | 32              | 14            | 6    | 1000  | 15208               | 822    |
| 46 Sikkim            | 0                                  | 8                                | 52               | 602                         | 280                     | 28              | 2             | 28   | 1000  | 126                 | 122    |
| 47 Tamil Nadu        | 3                                  | 44                               | 276              | 539                         | 109                     | 29              | 1             | 0    | 1000  | 24916               | 1152   |
| 49 Tripura           | 10                                 | 32                               | 206              | 583                         | 131                     | 9               | 0             | 28   | 1000  | 1057                | 212    |
| 50 Uttaranchal       | 0                                  | 36                               | 136              | 550                         | 203                     | 11              | 0             | 63   | 1000  | 3232                | 152    |
| 51 Uttar Pradesh     | 3                                  | 31                               | 115              | 558                         | 221                     | 40              | 4             | 28   | 1000  | 51892               | 2442   |
| 52 West Bengal       | 0                                  | 17                               | 107              | 672                         | 140                     | 29              | 9             | 26   | 1000  | 26855               | 1202   |
| 54 A & N Islands     | 0                                  | 2                                | 32               | 707                         | 243                     | 3               | 0             | 13   | 1000  | 94                  | 52     |
| 55 Chandigarh        | 9                                  | 22                               | 177              | 584                         | 137                     | 61              | 11            | 0    | 1000  | 205                 | 82     |
| 56 Dadra & N. Haveli | 0                                  | 0                                | 70               | 795                         | 136                     | 0               | 0             | 0    | 1000  | 82                  | 32     |
| 58 Daman & Diu       | 0                                  | 88                               | 98               | 670                         | 84                      | 60              | 0             | 0    | 1000  | 14                  | 22     |
| 59 Lakshadweep       | 0                                  | 0                                | 69               | 599                         | 184                     | 149             | 0             | 0    | 1000  | 15                  | 32     |
| 60 Pondicherry       | 0                                  | 33                               | 264              | 551                         | 131                     | 20              | 0             | 0    | 1000  | 379                 | 62     |

Continued

Table (14): Per 1000 distribution of aged persons by type of living arrangement for each sex and State/UT

| State/ut                      | living arrangement of aged persons |                                  |                  |                             |                         |                 |               |      | no. of aged persons |            |        |
|-------------------------------|------------------------------------|----------------------------------|------------------|-----------------------------|-------------------------|-----------------|---------------|------|---------------------|------------|--------|
|                               | living alone                       |                                  | with spouse only | with spouse & other members | without spouse but with |                 |               | n.r. | total               | estd. (00) | sample |
|                               | as an inmate of old age home       | not as an inmate of old age home |                  |                             | children                | other relations | non-relations |      |                     |            |        |
| (1)                           | (2)                                | (3)                              | (4)              | (5)                         | (6)                     | (7)             | (8)           | (9)  | (10)                | (11)       | (12)   |
| Andhra Pradesh                | 6                                  | 23                               | 118              | 615                         | 142                     | 10              | 2             | 84   | 1000                | 2909       | 1298   |
| Goa                           | 2                                  | 24                               | 187              | 607                         | 147                     | 30              | 3             | 2    | 1000                | 789        | 298    |
| Karnataka                     | 3                                  | 23                               | 155              | 609                         | 165                     | 24              | 3             | 17   | 1000                | 332005     | 17750  |
| std. no. of aged persons (00) | 1053                               | 7716                             | 51410            | 202339                      | 54785                   | 8110            | 1083          | 5510 | 332005              | X          | ∞      |
| sample aged persons           | 56                                 | 381                              | 2499             | 11042                       | 2901                    | 453             | 70            | 348  | 17750               | X          | ∞      |

1  
2

3 Table (14): Per 1000 distribution of aged persons by type of living arrangement for each sex and State/UT

4 Rural+Urban

| 5 State/ut           | 6 living arrangement of aged persons |                                     |                    |                                |                            |                    |                  |         |          | 7 Females              |           |
|----------------------|--------------------------------------|-------------------------------------|--------------------|--------------------------------|----------------------------|--------------------|------------------|---------|----------|------------------------|-----------|
|                      | 8 living alone                       |                                     | 9 with spouse only | 10 with spouse & other members | 11 without spouse but with |                    |                  | 12 n.r. | 13 total | 14 no. of aged persons |           |
|                      | 15 as an inmate of old age home      | 16 not as an inmate of old age home |                    |                                | 17 children                | 18 other relations | 19 non-relations |         |          | 20 estd. (00)          | 21 sample |
| 22 (1)               | 23 (2)                               | 24 (3)                              | 25 (4)             | 26 (5)                         | 27 (6)                     | 28 (7)             | 29 (8)           | 30 (9)  | 31 (10)  | 32 (11)                | 33 (12)   |
| 34 Andhra Pradesh    | 5                                    | 127                                 | 125                | 161                            | 492                        | 77                 | 1                | 12      | 1000     | 26195                  | 1109      |
| 35 Arunachal Pradesh | 2                                    | 49                                  | 20                 | 341                            | 401                        | 24                 | 0                | 165     | 1000     | 211                    | 148       |
| 36 Assam             | 0                                    | 57                                  | 28                 | 224                            | 617                        | 14                 | 1                | 58      | 1000     | 4806                   | 408       |
| 37 Bihar             | 15                                   | 37                                  | 90                 | 394                            | 410                        | 15                 | 6                | 32      | 1000     | 17087                  | 822       |
| 38 Chhattisgarh      | 42                                   | 81                                  | 79                 | 216                            | 495                        | 54                 | 13               | 20      | 1000     | 7440                   | 378       |
| 39 Delhi             | 0                                    | 56                                  | 72                 | 399                            | 433                        | 28                 | 2                | 10      | 1000     | 2452                   | 222       |
| 40 Goa               | 0                                    | 55                                  | 104                | 301                            | 387                        | 152                | 0                | 0       | 1000     | 871                    | 72        |
| 41 Gujarat           | 2                                    | 80                                  | 105                | 289                            | 492                        | 29                 | 0                | 3       | 1000     | 15501                  | 689       |
| 42 Haryana           | 1                                    | 20                                  | 63                 | 477                            | 402                        | 19                 | 11               | 8       | 1000     | 7235                   | 372       |
| 43 Himachal Pradesh  | 2                                    | 35                                  | 72                 | 240                            | 541                        | 80                 | 0                | 30      | 1000     | 2701                   | 396       |
| 44 Jammu & Kashmir   | 3                                    | 9                                   | 51                 | 416                            | 493                        | 22                 | 0                | 8       | 1000     | 1891                   | 262       |
| 45 Jharkhand         | 12                                   | 33                                  | 55                 | 361                            | 493                        | 17                 | 2                | 28      | 1000     | 5733                   | 370       |
| 46 Karnataka         | 0                                    | 91                                  | 56                 | 199                            | 569                        | 76                 | 3                | 8       | 1000     | 14951                  | 756       |
| 47 Kerala            | 0                                    | 46                                  | 58                 | 262                            | 539                        | 73                 | 7                | 15      | 1000     | 19699                  | 972       |
| 48 Madhya Pradesh    | 18                                   | 61                                  | 111                | 298                            | 421                        | 60                 | 3                | 29      | 1000     | 19166                  | 872       |
| 49 Maharashtra       | 8                                    | 84                                  | 92                 | 302                            | 439                        | 60                 | 6                | 10      | 1000     | 38001                  | 1388      |
| 50 Manipur           | 0                                    | 26                                  | 10                 | 317                            | 461                        | 38                 | 0                | 148     | 1000     | 456                    | 278       |
| 51 Meghalaya         | 0                                    | 44                                  | 84                 | 231                            | 570                        | 11                 | 0                | 60      | 1000     | 479                    | 142       |
| 52 Mizoram           | 0                                    | 7                                   | 6                  | 372                            | 400                        | 76                 | 10               | 129     | 1000     | 137                    | 152       |
| 53 Nagaland          | 0                                    | 0                                   | 137                | 614                            | 249                        | 0                  | 0                | 0       | 1000     | 47                     | 29        |
| 54 Orissa            | 4                                    | 39                                  | 76                 | 308                            | 498                        | 34                 | 9                | 32      | 1000     | 13339                  | 596       |
| 55 Punjab            | 0                                    | 34                                  | 86                 | 430                            | 428                        | 17                 | 0                | 4       | 1000     | 8865                   | 402       |
| 56 Rajasthan         | 5                                    | 43                                  | 79                 | 320                            | 512                        | 37                 | 4                | 0       | 1000     | 16075                  | 849       |
| 57 Sikkim            | 24                                   | 0                                   | 45                 | 345                            | 462                        | 53                 | 0                | 72      | 1000     | 116                    | 107       |
| 58 Tamil Nadu        | 0                                    | 169                                 | 106                | 203                            | 422                        | 92                 | 9                | 0       | 1000     | 26130                  | 1199      |
| 59 Tripura           | 14                                   | 103                                 | 77                 | 189                            | 514                        | 77                 | 11               | 16      | 1000     | 812                    | 189       |
| 60 Uttarakhand       | 6                                    | 147                                 | 89                 | 274                            | 443                        | 18                 | 8                | 15      | 1000     | 2884                   | 139       |
| 61 Uttar Pradesh     | 8                                    | 39                                  | 84                 | 347                            | 444                        | 42                 | 10               | 26      | 1000     | 50887                  | 2270      |
| 62 West Bengal       | 3                                    | 49                                  | 48                 | 215                            | 574                        | 68                 | 10               | 33      | 1000     | 26787                  | 1192      |
| 63 A & N Islands     | 0                                    | 82                                  | 8                  | 224                            | 451                        | 106                | 0                | 128     | 1000     | 58                     | 37        |
| 64 Chandigarh        | 0                                    | 91                                  | 198                | 287                            | 400                        | 8                  | 8                | 10      | 1000     | 155                    | 79        |
| 65 Dadra & N. Haveli | 0                                    | 37                                  | 54                 | 361                            | 541                        | 8                  | 0                | 0       | 1000     | 42                     | 22        |
| 66 Daman & Diu       | 0                                    | 272                                 | 6                  | 144                            | 555                        | 0                  | 0                | 23      | 1000     | 29                     | 32        |
| 67 Lakshadweep       | 0                                    | 60                                  | 44                 | 131                            | 668                        | 97                 | 0                | 0       | 1000     | 19                     | 46        |
| 68 Pondicherry       | 0                                    | 80                                  | 66                 | 202                            | 620                        | 32                 | 0                | 0       | 1000     | 516                    | 72        |

Continued



Table (14): Per 1000 distribution of aged persons by type of living arrangement for each sex and State/UT

| State/UT                      | living arrangement of aged persons |                                  |                  |                             |                         |                 |               |      | Females |                     |        |
|-------------------------------|------------------------------------|----------------------------------|------------------|-----------------------------|-------------------------|-----------------|---------------|------|---------|---------------------|--------|
|                               | living alone                       |                                  | with spouse only | with spouse & other members | without spouse but with |                 |               | n.r. | total   | no. of aged persons |        |
|                               | as an inmate of old age home       | not as an inmate of old age home |                  |                             | children                | other relations | non-relations |      |         | estd. (00)          | sample |
| (1)                           | (2)                                | (3)                              | (4)              | (5)                         | (6)                     | (7)             | (8)           | (9)  | (10)    | (11)                | (12)   |
| INDIA                         | 6                                  | 56                               | 55               | 266                         | 489                     | 47              | 5             | 75   | 1000    | 2257                | 104    |
| UTs                           | 0                                  | 86                               | 84               | 224                         | 561                     | 32              | 1             | 12   | 1000    | 821                 | 29     |
| India                         | 6                                  | 70                               | 84               | 286                         | 476                     | 53              | 6             | 18   | 1000    | 331775              | 1708   |
| std. no. of aged persons (00) | 2092                               | 23167                            | 27939            | 94962                       | 158064                  | 17610           | 2019          | 5922 | 331775  | X                   | λ      |
| sample aged persons           | 84                                 | 988                              | 1376             | 5085                        | 8225                    | 868             | 76            | 379  | 17081   | X                   | λ      |

1  
2

3 Table (14): Per 1000 distribution of aged persons by type of living arrangement for each sex and State/UT

4 Rural+Urban

Persons

| 5 State/ut           | 6 living arrangement of aged persons |                                     |                    |                                |                            |                    |                  |         | 7 no. of aged persons |               |           |
|----------------------|--------------------------------------|-------------------------------------|--------------------|--------------------------------|----------------------------|--------------------|------------------|---------|-----------------------|---------------|-----------|
|                      | 8 living alone                       |                                     | 9 with spouse only | 10 with spouse & other members | 11 without spouse but with |                    |                  | 12 n.r. | 13 total              | 14 estd. (00) | 15 sample |
|                      | 16 as an inmate of old age home      | 17 not as an inmate of old age home |                    |                                | 18 children                | 19 other relations | 20 non-relations |         |                       |               |           |
| 21 (1)               | 22 (2)                               | 23 (3)                              | 24 (4)             | 25 (5)                         | 26 (6)                     | 27 (7)             | 28 (8)           | 29 (9)  | 30 (10)               | 31 (11)       | 32 (12)   |
| 33 Andhra Pradesh    | 4                                    | 81                                  | 209                | 324                            | 324                        | 47                 | 1                | 10      | 1000                  | 50236         | 2183      |
| 34 Arunachal Pradesh | 1                                    | 34                                  | 34                 | 453                            | 256                        | 12                 | 0                | 211     | 1000                  | 460           | 330       |
| 35 Assam             | 1                                    | 25                                  | 35                 | 525                            | 352                        | 12                 | 1                | 49      | 1000                  | 11556         | 988       |
| 36 Bihar             | 13                                   | 26                                  | 117                | 509                            | 293                        | 11                 | 5                | 28      | 1000                  | 38403         | 1904      |
| 37 Chhattisgarh      | 33                                   | 53                                  | 114                | 348                            | 376                        | 36                 | 16               | 23      | 1000                  | 12690         | 644       |
| 38 Delhi             | 1                                    | 35                                  | 91                 | 532                            | 303                        | 25                 | 3                | 11      | 1000                  | 5002          | 451       |
| 39 Goa               | 0                                    | 37                                  | 149                | 468                            | 232                        | 114                | 0                | 0       | 1000                  | 1606          | 123       |
| 40 Gujarat           | 1                                    | 56                                  | 137                | 442                            | 341                        | 20                 | 0                | 4       | 1000                  | 30551         | 1337      |
| 41 Haryana           | 0                                    | 10                                  | 73                 | 581                            | 305                        | 18                 | 7                | 5       | 1000                  | 14158         | 759       |
| 42 Himachal Pradesh  | 2                                    | 36                                  | 102                | 413                            | 366                        | 50                 | 6                | 24      | 1000                  | 5240          | 792       |
| 43 Jammu & Kashmir   | 1                                    | 4                                   | 50                 | 577                            | 324                        | 25                 | 2                | 15      | 1000                  | 4545          | 596       |
| 44 Jharkhand         | 6                                    | 31                                  | 97                 | 480                            | 338                        | 23                 | 1                | 23      | 1000                  | 13505         | 866       |
| 45 Karnataka         | 1                                    | 52                                  | 92                 | 454                            | 345                        | 49                 | 1                | 5       | 1000                  | 30618         | 1529      |
| 46 Kerala            | 0                                    | 30                                  | 93                 | 455                            | 356                        | 52                 | 5                | 9       | 1000                  | 35359         | 1766      |
| 47 Madhya Pradesh    | 15                                   | 40                                  | 141                | 432                            | 293                        | 51                 | 3                | 27      | 1000                  | 37947         | 1739      |
| 48 Maharashtra       | 4                                    | 53                                  | 127                | 470                            | 294                        | 40                 | 3                | 8       | 1000                  | 74193         | 2701      |
| 49 Manipur           | 6                                    | 19                                  | 39                 | 463                            | 283                        | 29                 | 4                | 157     | 1000                  | 1043          | 604       |
| 50 Meghalaya         | 0                                    | 37                                  | 94                 | 476                            | 337                        | 6                  | 1                | 49      | 1000                  | 988           | 271       |
| 51 Mizoram           | 0                                    | 8                                   | 25                 | 504                            | 284                        | 38                 | 4                | 138     | 1000                  | 341           | 383       |
| 52 Nagaland          | 0                                    | 6                                   | 84                 | 756                            | 138                        | 0                  | 0                | 16      | 1000                  | 224           | 109       |
| 53 Orissa            | 2                                    | 31                                  | 119                | 496                            | 298                        | 21                 | 4                | 28      | 1000                  | 28256         | 1269      |
| 54 Punjab            | 2                                    | 27                                  | 95                 | 539                            | 302                        | 25                 | 0                | 11      | 1000                  | 18274         | 826       |
| 55 Rajasthan         | 5                                    | 30                                  | 99                 | 471                            | 349                        | 34                 | 9                | 3       | 1000                  | 31284         | 1671      |
| 56 Sikkim            | 11                                   | 4                                   | 49                 | 479                            | 367                        | 40                 | 1                | 49      | 1000                  | 242           | 233       |
| 57 Tamil Nadu        | 1                                    | 108                                 | 189                | 367                            | 269                        | 61                 | 5                | 0       | 1000                  | 51046         | 2357      |
| 58 Tripura           | 12                                   | 63                                  | 150                | 412                            | 297                        | 39                 | 5                | 23      | 1000                  | 1869          | 403       |
| 59 Uttarakhand       | 3                                    | 89                                  | 114                | 420                            | 316                        | 14                 | 4                | 40      | 1000                  | 6116          | 290       |
| 60 Uttar Pradesh     | 5                                    | 35                                  | 100                | 453                            | 331                        | 41                 | 7                | 27      | 1000                  | 102779        | 4713      |
| 61 West Bengal       | 1                                    | 33                                  | 78                 | 444                            | 356                        | 48                 | 9                | 30      | 1000                  | 53642         | 2394      |
| 62 A & N Islands     | 0                                    | 33                                  | 23                 | 523                            | 322                        | 42                 | 0                | 57      | 1000                  | 152           | 89        |
| 63 Chandigarh        | 5                                    | 52                                  | 186                | 456                            | 250                        | 38                 | 10               | 4       | 1000                  | 360           | 163       |
| 64 Dadra & N. Haveli | 0                                    | 13                                  | 64                 | 647                            | 273                        | 3                  | 0                | 0       | 1000                  | 124           | 57        |
| 65 Daman & Diu       | 0                                    | 213                                 | 36                 | 314                            | 403                        | 19                 | 0                | 15      | 1000                  | 43            | 58        |
| 66 Lakshadweep       | 0                                    | 34                                  | 55                 | 338                            | 454                        | 120                | 0                | 0       | 1000                  | 35            | 83        |
| 67 Pondicherry       | 0                                    | 60                                  | 150                | 350                            | 413                        | 27                 | 0                | 0       | 1000                  | 895           | 141       |

Continued

Table (14): Per 1000 distribution of aged persons by type of living arrangement for each sex and State/UT

| State/UT         | living arrangement of aged persons |                                  |                  |                             |                         |                 |               |      | no. of aged persons |            |        |
|------------------|------------------------------------|----------------------------------|------------------|-----------------------------|-------------------------|-----------------|---------------|------|---------------------|------------|--------|
|                  | living alone                       |                                  | with spouse only | with spouse & other members | without spouse but with |                 |               | n.r. | total               | estd. (00) | sample |
|                  | as an inmate of old age home       | not as an inmate of old age home |                  |                             | children                | other relations | non-relations |      |                     |            |        |
|                  | (2)                                | (3)                              | (4)              | (5)                         | (6)                     | (7)             | (8)           | (9)  | (10)                | (11)       | (12)   |
| Andhra Pradesh   | 6                                  | 38                               | 91               | 462                         | 294                     | 26              | 3             | 80   | 1000                | 5167       | 2336   |
| Assam            | 1                                  | 56                               | 134              | 412                         | 358                     | 31              | 2             | 7    | 1000                | 1609       | 593    |
| Bihar            | 5                                  | 47                               | 120              | 448                         | 321                     | 39              | 5             | 17   | 1000                | 663779     | 3483   |
| Chhattisgarh     |                                    |                                  |                  |                             |                         |                 |               | 1143 |                     |            |        |
| Goa              | 3145                               | 30883                            | 79349            | 297301                      | 212848                  | 25719           | 3102          | 2    | 663779              | X          | ∞      |
| Gujarat          | 140                                | 1369                             | 3875             | 16127                       | 11126                   | 1321            | 146           | 727  | 34831               | X          | ∞      |
| Haryana          |                                    |                                  |                  |                             |                         |                 |               |      |                     |            |        |
| Himachal Pradesh |                                    |                                  |                  |                             |                         |                 |               |      |                     |            |        |
| Jammu & Kashmir  |                                    |                                  |                  |                             |                         |                 |               |      |                     |            |        |
| Karnataka        |                                    |                                  |                  |                             |                         |                 |               |      |                     |            |        |
| Kerala           |                                    |                                  |                  |                             |                         |                 |               |      |                     |            |        |
| Madhya Pradesh   |                                    |                                  |                  |                             |                         |                 |               |      |                     |            |        |
| Maharashtra      |                                    |                                  |                  |                             |                         |                 |               |      |                     |            |        |
| Madhya Pradesh   |                                    |                                  |                  |                             |                         |                 |               |      |                     |            |        |
| Odisha           |                                    |                                  |                  |                             |                         |                 |               |      |                     |            |        |
| Punjab           |                                    |                                  |                  |                             |                         |                 |               |      |                     |            |        |
| Rajasthan        |                                    |                                  |                  |                             |                         |                 |               |      |                     |            |        |
| Tamil Nadu       |                                    |                                  |                  |                             |                         |                 |               |      |                     |            |        |
| Telangana        |                                    |                                  |                  |                             |                         |                 |               |      |                     |            |        |
| Uttar Pradesh    |                                    |                                  |                  |                             |                         |                 |               |      |                     |            |        |
| West Bengal      |                                    |                                  |                  |                             |                         |                 |               |      |                     |            |        |
| All-India        |                                    |                                  |                  |                             |                         |                 |               |      |                     |            |        |

Table (15): Per 1000 distribution of aged persons living alone or living with spouse only by location of residence of any child/ grandchild or sibling for each sex

| Rural                                                   |                                                   |                         |                      |                |      |       | Males                                                |        |
|---------------------------------------------------------|---------------------------------------------------|-------------------------|----------------------|----------------|------|-------|------------------------------------------------------|--------|
| state/ut                                                | location of residence of child/grandchild/sibling |                         |                      |                |      |       | no. of aged persons living alone or with spouse only |        |
|                                                         | within the same building                          | within the village/town | outside village/town | not applicable | n.r. | total | estd. (00)                                           | sample |
| (1)                                                     | (2)                                               | (3)                     | (4)                  | (5)            | (6)  | (7)   | (8)                                                  | (9)    |
| Andhra Pradesh                                          | 220                                               | 438                     | 239                  | 89             | 14   | 1000  | 6766                                                 | 239    |
| Arunachal Pradesh                                       | 288                                               | 208                     | 150                  | 79             | 274  | 1000  | 16                                                   | 12     |
| Assam                                                   | 122                                               | 311                     | 391                  | 0              | 175  | 1000  | 274                                                  | 30     |
| Bihar                                                   | 242                                               | 310                     | 178                  | 136            | 134  | 1000  | 3388                                                 | 192    |
| Chhattisgarh                                            | 211                                               | 412                     | 150                  | 223            | 4    | 1000  | 1009                                                 | 47     |
| Delhi                                                   | 0                                                 | 0                       | 0                    | 0              | 0    | 0     | 0                                                    | 0      |
| Goa                                                     | 0                                                 | 0                       | 1000                 | 0              | 0    | 1000  | 137                                                  | 3      |
| Gujarat                                                 | 160                                               | 377                     | 382                  | 80             | 0    | 1000  | 2328                                                 | 86     |
| Haryana                                                 | 226                                               | 481                     | 207                  | 86             | 0    | 1000  | 395                                                  | 20     |
| Himachal Pradesh                                        | 239                                               | 210                     | 337                  | 200            | 14   | 1000  | 420                                                  | 58     |
| Jammu & Kashmir                                         | 54                                                | 736                     | 118                  | 93             | 0    | 1000  | 80                                                   | 12     |
| Jharkhand                                               | 162                                               | 523                     | 147                  | 135            | 32   | 1000  | 1115                                                 | 75     |
| Karnataka                                               | 127                                               | 312                     | 442                  | 120            | 0    | 1000  | 1849                                                 | 55     |
| Kerala                                                  | 68                                                | 331                     | 392                  | 209            | 0    | 1000  | 1624                                                 | 65     |
| Madhya Pradesh                                          | 189                                               | 479                     | 200                  | 125            | 7    | 1000  | 3266                                                 | 123    |
| Maharashtra                                             | 295                                               | 354                     | 256                  | 87             | 8    | 1000  | 4831                                                 | 136    |
| Manipur                                                 | 464                                               | 217                     | 93                   | 160            | 66   | 1000  | 37                                                   | 18     |
| Meghalaya                                               | 28                                                | 350                     | 128                  | 336            | 159  | 1000  | 65                                                   | 15     |
| Mizoram                                                 | 0                                                 | 891                     | 0                    | 109            | 0    | 1000  | 5                                                    | 4      |
| Nagaland                                                | 0                                                 | 708                     | 292                  | 0              | 0    | 1000  | 14                                                   | 8      |
| Orissa                                                  | 213                                               | 270                     | 262                  | 175            | 79   | 1000  | 2437                                                 | 97     |
| Punjab                                                  | 346                                               | 312                     | 299                  | 42             | 0    | 1000  | 896                                                  | 29     |
| Rajasthan                                               | 214                                               | 354                     | 311                  | 121            | 0    | 1000  | 1715                                                 | 87     |
| Sikkim                                                  | 0                                                 | 673                     | 197                  | 129            | 0    | 1000  | 8                                                    | 9      |
| Tamil Nadu                                              | 131                                               | 477                     | 344                  | 48             | 0    | 1000  | 5993                                                 | 194    |
| Tripura                                                 | 640                                               | 108                     | 77                   | 153            | 21   | 1000  | 241                                                  | 45     |
| Uttaranchal                                             | 203                                               | 65                      | 612                  | 120            | 0    | 1000  | 447                                                  | 20     |
| Uttar Pradesh                                           | 175                                               | 315                     | 237                  | 169            | 104  | 1000  | 6407                                                 | 270    |
| West Bengal                                             | 364                                               | 271                     | 199                  | 150            | 17   | 1000  | 2185                                                 | 87     |
| A & N Islands                                           | 0                                                 | 0                       | 1000                 | 0              | 0    | 1000  | 3                                                    | 3      |
| Chandigarh                                              | 76                                                | 817                     | 0                    | 108            | 0    | 1000  | 3                                                    | 6      |
| Dadra & N. Haveli                                       | 422                                               | 578                     | 0                    | 0              | 0    | 1000  | 5                                                    | 3      |
| Daman & Diu                                             | 188                                               | 495                     | 0                    | 317            | 0    | 1000  | 1                                                    | 3      |
| Lakshadweep                                             | 0                                                 | 0                       | 1000                 | 0              | 0    | 1000  | 0                                                    | 1      |
| Pondicherry                                             | 52                                                | 316                     | 487                  | 144            | 0    | 1000  | 67                                                   | 7      |
| ONES                                                    | 462                                               | 206                     | 99                   | 175            | 58   | 1000  | 385                                                  | 111    |
| GUTs                                                    | 77                                                | 343                     | 452                  | 129            | 0    | 1000  | 80                                                   | 23     |
| all-India                                               | 205                                               | 372                     | 272                  | 117            | 34   | 1000  | 48029                                                | 2059   |
| estd. no. of aged living alone or with spouse only (00) | 9862                                              | 17850                   | 13047                | 5640           | 1630 | 48029 | X                                                    | X      |
| sample aged living alone or with spouse only            | 444                                               | 747                     | 531                  | 258            | 79   | 2059  | X                                                    | X      |

Table (15): Per 1000 distribution of aged persons living alone or living with spouse only by location of residence of any child/ grandchild or sibling for each sex

| Rural                                                   |                                                   |                         |                      |                |      |       | Females                                              |        |
|---------------------------------------------------------|---------------------------------------------------|-------------------------|----------------------|----------------|------|-------|------------------------------------------------------|--------|
| state/ut                                                | location of residence of child/grandchild/sibling |                         |                      |                |      |       | no. of aged persons living alone or with spouse only |        |
|                                                         | within the same building                          | within the village/town | outside village/town | not applicable | n.r. | total | estd. (00)                                           | sample |
| (1)                                                     | (2)                                               | (3)                     | (4)                  | (5)            | (6)  | (7)   | (8)                                                  | (9)    |
| Andhra Pradesh                                          | 148                                               | 516                     | 262                  | 61             | 13   | 1000  | 5576                                                 | 177    |
| Arunachal Pradesh                                       | 709                                               | 100                     | 133                  | 58             | 0    | 1000  | 14                                                   | 10     |
| Assam                                                   | 227                                               | 267                     | 292                  | 55             | 158  | 1000  | 408                                                  | 38     |
| Bihar                                                   | 214                                               | 229                     | 270                  | 160            | 128  | 1000  | 2183                                                 | 118    |
| Chhattisgarh                                            | 186                                               | 446                     | 144                  | 197            | 27   | 1000  | 1370                                                 | 57     |
| Delhi                                                   | 0                                                 | 1000                    | 0                    | 0              | 0    | 1000  | 13                                                   | 1      |
| Goa                                                     | 37                                                | 0                       | 963                  | 0              | 0    | 1000  | 81                                                   | 3      |
| Gujarat                                                 | 145                                               | 399                     | 324                  | 132            | 0    | 1000  | 2093                                                 | 80     |
| Haryana                                                 | 253                                               | 370                     | 304                  | 72             | 0    | 1000  | 353                                                  | 19     |
| Himachal Pradesh                                        | 227                                               | 232                     | 408                  | 132            | 0    | 1000  | 285                                                  | 45     |
| Jammu & Kashmir                                         | 257                                               | 608                     | 135                  | 0              | 0    | 1000  | 70                                                   | 11     |
| Jharkhand                                               | 88                                                | 386                     | 249                  | 234            | 44   | 1000  | 481                                                  | 36     |
| Karnataka                                               | 180                                               | 288                     | 371                  | 162            | 0    | 1000  | 1767                                                 | 60     |
| Kerala                                                  | 31                                                | 468                     | 280                  | 198            | 23   | 1000  | 1466                                                 | 64     |
| Madhya Pradesh                                          | 245                                               | 416                     | 217                  | 123            | 0    | 1000  | 3109                                                 | 110    |
| Maharashtra                                             | 198                                               | 314                     | 335                  | 145            | 8    | 1000  | 4895                                                 | 124    |
| Manipur                                                 | 157                                               | 644                     | 0                    | 199            | 0    | 1000  | 7                                                    | 6      |
| Meghalaya                                               | 88                                                | 352                     | 0                    | 93             | 467  | 1000  | 56                                                   | 11     |
| Mizoram                                                 | 0                                                 | 0                       | 0                    | 0              | 1000 | 1000  | 0                                                    | 1      |
| Nagaland                                                | 0                                                 | 636                     | 364                  | 0              | 0    | 1000  | 6                                                    | 3      |
| Orissa                                                  | 200                                               | 380                     | 273                  | 72             | 75   | 1000  | 1477                                                 | 63     |
| Punjab                                                  | 299                                               | 217                     | 484                  | 0              | 0    | 1000  | 844                                                  | 27     |
| Rajasthan                                               | 163                                               | 454                     | 247                  | 135            | 0    | 1000  | 1610                                                 | 76     |
| Sikkim                                                  | 0                                                 | 528                     | 423                  | 50             | 0    | 1000  | 8                                                    | 6      |
| Tamil Nadu                                              | 53                                                | 585                     | 314                  | 48             | 0    | 1000  | 5211                                                 | 166    |
| Tripura                                                 | 533                                               | 161                     | 168                  | 138            | 0    | 1000  | 147                                                  | 24     |
| Uttaranchal                                             | 30                                                | 301                     | 625                  | 45             | 0    | 1000  | 601                                                  | 23     |
| Uttar Pradesh                                           | 182                                               | 295                     | 276                  | 125            | 122  | 1000  | 5610                                                 | 231    |
| West Bengal                                             | 293                                               | 417                     | 194                  | 73             | 23   | 1000  | 1858                                                 | 79     |
| A & N Islands                                           | 0                                                 | 0                       | 1000                 | 0              | 0    | 1000  | 5                                                    | 2      |
| Chandigarh                                              | 0                                                 | 1000                    | 0                    | 0              | 0    | 1000  | 0                                                    | 2      |
| Dadra & N. Haveli                                       | 583                                               | 0                       | 0                    | 417            | 0    | 1000  | 4                                                    | 2      |
| Daman & Diu                                             | 141                                               | 859                     | 0                    | 0              | 0    | 1000  | 5                                                    | 6      |
| Lakshadweep                                             | 0                                                 | 1000                    | 0                    | 0              | 0    | 1000  | 0                                                    | 2      |
| Pondicherry                                             | 0                                                 | 0                       | 494                  | 506            | 0    | 1000  | 19                                                   | 3      |
| ONES                                                    | 394                                               | 242                     | 135                  | 118            | 111  | 1000  | 239                                                  | 61     |
| GUTs                                                    | 86                                                | 158                     | 426                  | 330            | 0    | 1000  | 34                                                   | 17     |
| all-India                                               | 169                                               | 398                     | 289                  | 110            | 34   | 1000  | 41633                                                | 1686   |
| estd. no. of aged living alone or with spouse only (00) | 7020                                              | 16587                   | 12032                | 4585           | 1409 | 41633 | X                                                    | X      |
| sample aged living alone or with spouse only            | 323                                               | 651                     | 458                  | 190            | 64   | 1686  | X                                                    | X      |

Table (15): Per 1000 distribution of aged persons living alone or living with spouse only by location of residence of any child/ grandchild or sibling for each sex

| Rural<br>state/ut                                             | location of residence of child/grandchild/sibling |                                   |                             |                   |      |       | Persons<br>no. of aged<br>persons living<br>alone or with<br>spouse only |        |
|---------------------------------------------------------------|---------------------------------------------------|-----------------------------------|-----------------------------|-------------------|------|-------|--------------------------------------------------------------------------|--------|
|                                                               | within the<br>same<br>building                    | within<br>the<br>village/<br>town | outside<br>village/to<br>wn | not<br>applicable | n.r. | total | estd.<br>(00)                                                            | sample |
| (1)                                                           | (2)                                               | (3)                               | (4)                         | (5)               | (6)  | (7)   | (8)                                                                      | (9)    |
| Andhra Pradesh                                                | 188                                               | 473                               | 249                         | 76                | 14   | 1000  | 12342                                                                    | 416    |
| Arunachal Pradesh                                             | 485                                               | 157                               | 142                         | 69                | 145  | 1000  | 29                                                                       | 22     |
| Assam                                                         | 185                                               | 285                               | 332                         | 33                | 165  | 1000  | 682                                                                      | 68     |
| Bihar                                                         | 231                                               | 278                               | 214                         | 145               | 132  | 1000  | 5571                                                                     | 310    |
| Chhattisgarh                                                  | 196                                               | 432                               | 147                         | 208               | 17   | 1000  | 2379                                                                     | 104    |
| Delhi                                                         | 0                                                 | 1000                              | 0                           | 0                 | 0    | 1000  | 13                                                                       | 1      |
| Goa                                                           | 14                                                | 0                                 | 986                         | 0                 | 0    | 1000  | 218                                                                      | 6      |
| Gujarat                                                       | 153                                               | 387                               | 355                         | 105               | 0    | 1000  | 4422                                                                     | 166    |
| Haryana                                                       | 239                                               | 429                               | 253                         | 79                | 0    | 1000  | 748                                                                      | 39     |
| Himachal Pradesh                                              | 234                                               | 219                               | 366                         | 173               | 8    | 1000  | 705                                                                      | 103    |
| Jammu & Kashmir                                               | 149                                               | 676                               | 125                         | 49                | 0    | 1000  | 150                                                                      | 23     |
| Jharkhand                                                     | 140                                               | 482                               | 178                         | 165               | 36   | 1000  | 1596                                                                     | 111    |
| Karnataka                                                     | 153                                               | 300                               | 407                         | 140               | 0    | 1000  | 3616                                                                     | 115    |
| Kerala                                                        | 50                                                | 396                               | 339                         | 204               | 11   | 1000  | 3090                                                                     | 129    |
| Madhya Pradesh                                                | 216                                               | 448                               | 208                         | 124               | 4    | 1000  | 6375                                                                     | 233    |
| Maharashtra                                                   | 246                                               | 333                               | 296                         | 117               | 8    | 1000  | 9727                                                                     | 260    |
| Manipur                                                       | 413                                               | 289                               | 78                          | 166               | 55   | 1000  | 45                                                                       | 24     |
| Meghalaya                                                     | 56                                                | 351                               | 69                          | 224               | 301  | 1000  | 121                                                                      | 26     |
| Mizoram                                                       | 0                                                 | 828                               | 0                           | 102               | 71   | 1000  | 5                                                                        | 5      |
| Nagaland                                                      | 0                                                 | 685                               | 315                         | 0                 | 0    | 1000  | 20                                                                       | 11     |
| Orissa                                                        | 208                                               | 312                               | 266                         | 136               | 78   | 1000  | 3914                                                                     | 160    |
| Punjab                                                        | 323                                               | 266                               | 389                         | 22                | 0    | 1000  | 1740                                                                     | 56     |
| Rajasthan                                                     | 189                                               | 403                               | 280                         | 128               | 0    | 1000  | 3325                                                                     | 163    |
| Sikkim                                                        | 0                                                 | 598                               | 313                         | 88                | 0    | 1000  | 16                                                                       | 15     |
| Tamil Nadu                                                    | 94                                                | 527                               | 330                         | 48                | 0    | 1000  | 11204                                                                    | 360    |
| Tripura                                                       | 599                                               | 128                               | 111                         | 147               | 13   | 1000  | 388                                                                      | 69     |
| Uttaranchal                                                   | 103                                               | 200                               | 619                         | 77                | 0    | 1000  | 1048                                                                     | 43     |
| Uttar Pradesh                                                 | 178                                               | 306                               | 255                         | 148               | 113  | 1000  | 12017                                                                    | 501    |
| West Bengal                                                   | 331                                               | 338                               | 196                         | 115               | 20   | 1000  | 4043                                                                     | 166    |
| A & N Islands                                                 | 0                                                 | 0                                 | 1000                        | 0                 | 0    | 1000  | 8                                                                        | 5      |
| Chandigarh                                                    | 67                                                | 839                               | 0                           | 95                | 0    | 1000  | 4                                                                        | 8      |
| Dadra & N. Haveli                                             | 490                                               | 335                               | 0                           | 175               | 0    | 1000  | 9                                                                        | 5      |
| Daman & Diu                                                   | 148                                               | 804                               | 0                           | 48                | 0    | 1000  | 6                                                                        | 9      |
| Lakshadweep                                                   | 0                                                 | 660                               | 340                         | 0                 | 0    | 1000  | 1                                                                        | 3      |
| Pondicherry                                                   | 41                                                | 246                               | 489                         | 224               | 0    | 1000  | 86                                                                       | 10     |
| ONES                                                          | 436                                               | 220                               | 113                         | 153               | 78   | 1000  | 624                                                                      | 172    |
| GUTs                                                          | 79                                                | 288                               | 444                         | 189               | 0    | 1000  | 114                                                                      | 40     |
| all-India                                                     | 188                                               | 384                               | 280                         | 114               | 34   | 1000  | 89662                                                                    | 3745   |
| estd. no. of aged living<br>alone or with spouse only<br>(00) | 16883                                             | 34437                             | 25078                       | 10225             | 3039 | 89662 | X                                                                        | X      |
| sample aged living alone<br>or with spouse only               | 767                                               | 1398                              | 989                         | 448               | 143  | 3745  | X                                                                        | X      |

Table (15): Per 1000 distribution of aged persons living alone or living with spouse only by location of residence of any child/ grandchild or sibling for each sex

| Urban                                                   |                                                   |                         |                      |                |      |       | Males                                                |        |
|---------------------------------------------------------|---------------------------------------------------|-------------------------|----------------------|----------------|------|-------|------------------------------------------------------|--------|
| state/ut                                                | location of residence of child/grandchild/sibling |                         |                      |                |      |       | no. of aged persons living alone or with spouse only |        |
|                                                         | within the same building                          | within the village/town | outside village/town | not applicable | n.r. | total | estd. (00)                                           | sample |
| (1)                                                     | (2)                                               | (3)                     | (4)                  | (5)            | (6)  | (7)   | (8)                                                  | (9)    |
| Andhra Pradesh                                          | 218                                               | 264                     | 404                  | 114            | 0    | 1000  | 1290                                                 | 90     |
| Arunachal Pradesh                                       | 385                                               | 269                     | 115                  | 0              | 231  | 1000  | 1                                                    | 6      |
| Assam                                                   | 92                                                | 0                       | 319                  | 336            | 252  | 1000  | 23                                                   | 5      |
| Bihar                                                   | 356                                               | 214                     | 84                   | 96             | 250  | 1000  | 152                                                  | 14     |
| Chhattisgarh                                            | 599                                               | 227                     | 0                    | 174            | 0    | 1000  | 31                                                   | 5      |
| Delhi                                                   | 126                                               | 346                     | 303                  | 226            | 0    | 1000  | 316                                                  | 31     |
| Goa                                                     | 237                                               | 0                       | 763                  | 0              | 0    | 1000  | 24                                                   | 4      |
| Gujarat                                                 | 171                                               | 200                     | 489                  | 140            | 0    | 1000  | 676                                                  | 39     |
| Haryana                                                 | 552                                               | 83                      | 365                  | 0              | 0    | 1000  | 180                                                  | 13     |
| Himachal Pradesh                                        | 0                                                 | 452                     | 174                  | 0              | 375  | 1000  | 21                                                   | 4      |
| Jammu & Kashmir                                         | 308                                               | 286                     | 194                  | 213            | 0    | 1000  | 56                                                   | 11     |
| Jharkhand                                               | 74                                                | 47                      | 669                  | 13             | 196  | 1000  | 118                                                  | 18     |
| Karnataka                                               | 116                                               | 295                     | 447                  | 143            | 0    | 1000  | 418                                                  | 39     |
| Kerala                                                  | 106                                               | 306                     | 345                  | 243            | 0    | 1000  | 697                                                  | 45     |
| Madhya Pradesh                                          | 174                                               | 339                     | 272                  | 183            | 31   | 1000  | 508                                                  | 46     |
| Maharashtra                                             | 158                                               | 177                     | 512                  | 153            | 0    | 1000  | 1887                                                 | 71     |
| Manipur                                                 | 902                                               | 0                       | 98                   | 0              | 0    | 1000  | 13                                                   | 9      |
| Meghalaya                                               | 0                                                 | 688                     | 312                  | 0              | 0    | 1000  | 2                                                    | 2      |
| Mizoram                                                 | 0                                                 | 370                     | 107                  | 161            | 362  | 1000  | 5                                                    | 9      |
| Nagaland                                                | 0                                                 | 0                       | 0                    | 0              | 0    | 0     | 0                                                    | 0      |
| Orissa                                                  | 67                                                | 315                     | 259                  | 83             | 276  | 1000  | 274                                                  | 25     |
| Punjab                                                  | 262                                               | 300                     | 346                  | 82             | 10   | 1000  | 301                                                  | 21     |
| Rajasthan                                               | 353                                               | 313                     | 191                  | 144            | 0    | 1000  | 409                                                  | 36     |
| Sikkim                                                  | 0                                                 | 0                       | 0                    | 0              | 0    | 0     | 0                                                    | 0      |
| Tamil Nadu                                              | 111                                               | 430                     | 327                  | 131            | 0    | 1000  | 2042                                                 | 122    |
| Tripura                                                 | 434                                               | 0                       | 0                    | 308            | 258  | 1000  | 21                                                   | 8      |
| Uttaranchal                                             | 95                                                | 236                     | 668                  | 0              | 0    | 1000  | 112                                                  | 10     |
| Uttar Pradesh                                           | 207                                               | 175                     | 386                  | 169            | 63   | 1000  | 1321                                                 | 98     |
| West Bengal                                             | 90                                                | 299                     | 394                  | 146            | 70   | 1000  | 1164                                                 | 70     |
| A & N Islands                                           | 0                                                 | 0                       | 0                    | 0              | 0    | 0     | 0                                                    | 0      |
| Chandigarh                                              | 203                                               | 175                     | 582                  | 40             | 0    | 1000  | 39                                                   | 10     |
| Dadra & N. Haveli                                       | 0                                                 | 934                     | 66                   | 0              | 0    | 1000  | 0                                                    | 3      |
| Daman & Diu                                             | 0                                                 | 560                     | 0                    | 440            | 0    | 1000  | 2                                                    | 2      |
| Lakshadweep                                             | 0                                                 | 1000                    | 0                    | 0              | 0    | 1000  | 1                                                    | 1      |
| Pondicherry                                             | 274                                               | 509                     | 111                  | 105            | 0    | 1000  | 45                                                   | 10     |
| ONES                                                    | 504                                               | 86                      | 62                   | 172            | 175  | 1000  | 42                                                   | 34     |
| GUTs                                                    | 233                                               | 368                     | 319                  | 81             | 0    | 1000  | 87                                                   | 26     |
| all-India                                               | 169                                               | 275                     | 384                  | 144            | 28   | 1000  | 12150                                                | 877    |
| estd. no. of aged living alone or with spouse only (00) | 2052                                              | 3338                    | 4670                 | 1748           | 342  | 12150 | X                                                    | X      |
| sample aged living alone or with spouse only            | 178                                               | 250                     | 287                  | 133            | 29   | 877   | X                                                    | X      |



Table (15): Per 1000 distribution of aged persons living alone or living with spouse only by location of residence of any child/ grandchild or sibling for each sex

| Urban                                                   |                                                   |                         |                      |                |      |       | Females                                              |        |
|---------------------------------------------------------|---------------------------------------------------|-------------------------|----------------------|----------------|------|-------|------------------------------------------------------|--------|
| state/ut                                                | location of residence of child/grandchild/sibling |                         |                      |                |      |       | no. of aged persons living alone or with spouse only |        |
|                                                         | within the same building                          | within the village/town | outside village/town | not applicable | n.r. | total | estd. (00)                                           | sample |
| (1)                                                     | (2)                                               | (3)                     | (4)                  | (5)            | (6)  | (7)   | (8)                                                  | (9)    |
| Andhra Pradesh                                          | 204                                               | 365                     | 320                  | 111            | 0    | 1000  | 1145                                                 | 79     |
| Arunachal Pradesh                                       | 400                                               | 0                       | 415                  | 0              | 185  | 1000  | 1                                                    | 7      |
| Assam                                                   | 0                                                 | 0                       | 0                    | 0              | 0    | 0     | 0                                                    | 0      |
| Bihar                                                   | 352                                               | 158                     | 194                  | 78             | 219  | 1000  | 247                                                  | 17     |
| Chhattisgarh                                            | 175                                               | 381                     | 0                    | 444            | 0    | 1000  | 137                                                  | 15     |
| Delhi                                                   | 209                                               | 424                     | 233                  | 134            | 0    | 1000  | 303                                                  | 27     |
| Goa                                                     | 0                                                 | 624                     | 279                  | 97             | 0    | 1000  | 58                                                   | 7      |
| Gujarat                                                 | 139                                               | 310                     | 439                  | 111            | 0    | 1000  | 810                                                  | 41     |
| Haryana                                                 | 308                                               | 272                     | 420                  | 0              | 0    | 1000  | 255                                                  | 17     |
| Himachal Pradesh                                        | 0                                                 | 1000                    | 0                    | 0              | 0    | 1000  | 9                                                    | 1      |
| Jammu & Kashmir                                         | 340                                               | 253                     | 164                  | 242            | 0    | 1000  | 47                                                   | 10     |
| Jharkhand                                               | 11                                                | 0                       | 591                  | 140            | 258  | 1000  | 90                                                   | 9      |
| Karnataka                                               | 186                                               | 244                     | 451                  | 119            | 0    | 1000  | 420                                                  | 31     |
| Kerala                                                  | 22                                                | 452                     | 371                  | 155            | 0    | 1000  | 578                                                  | 34     |
| Madhya Pradesh                                          | 231                                               | 403                     | 166                  | 163            | 37   | 1000  | 521                                                  | 45     |
| Maharashtra                                             | 222                                               | 272                     | 391                  | 77             | 38   | 1000  | 2068                                                 | 72     |
| Manipur                                                 | 414                                               | 181                     | 405                  | 0              | 0    | 1000  | 9                                                    | 3      |
| Meghalaya                                               | 290                                               | 579                     | 131                  | 0              | 0    | 1000  | 6                                                    | 4      |
| Mizoram                                                 | 240                                               | 760                     | 0                    | 0              | 0    | 1000  | 1                                                    | 4      |
| Nagaland                                                | 0                                                 | 0                       | 0                    | 0              | 0    | 0     | 0                                                    | 0      |
| Orissa                                                  | 158                                               | 662                     | 106                  | 74             | 0    | 1000  | 115                                                  | 12     |
| Punjab                                                  | 369                                               | 327                     | 185                  | 105            | 14   | 1000  | 220                                                  | 16     |
| Rajasthan                                               | 294                                               | 399                     | 242                  | 65             | 0    | 1000  | 437                                                  | 32     |
| Sikkim                                                  | 0                                                 | 0                       | 0                    | 0              | 0    | 0     | 0                                                    | 0      |
| Tamil Nadu                                              | 101                                               | 476                     | 233                  | 190            | 0    | 1000  | 1975                                                 | 116    |
| Tripura                                                 | 615                                               | 156                     | 73                   | 156            | 0    | 1000  | 10                                                   | 6      |
| Uttaranchal                                             | 18                                                | 281                     | 473                  | 228            | 0    | 1000  | 97                                                   | 10     |
| Uttar Pradesh                                           | 181                                               | 165                     | 327                  | 177            | 150  | 1000  | 1082                                                 | 74     |
| West Bengal                                             | 118                                               | 422                     | 291                  | 164            | 5    | 1000  | 819                                                  | 48     |
| A & N Islands                                           | 0                                                 | 1000                    | 0                    | 0              | 0    | 1000  | 0                                                    | 1      |
| Chandigarh                                              | 237                                               | 289                     | 349                  | 125            | 0    | 1000  | 44                                                   | 11     |
| Dadra & N. Haveli                                       | 0                                                 | 1000                    | 0                    | 0              | 0    | 1000  | 0                                                    | 1      |
| Daman & Diu                                             | 0                                                 | 140                     | 860                  | 0              | 0    | 1000  | 3                                                    | 2      |
| Lakshadweep                                             | 0                                                 | 525                     | 0                    | 475            | 0    | 1000  | 2                                                    | 2      |
| Pondicherry                                             | 366                                               | 634                     | 0                    | 0              | 0    | 1000  | 56                                                   | 8      |
| ONES                                                    | 450                                               | 281                     | 205                  | 56             | 7    | 1000  | 26                                                   | 24     |
| GUTs                                                    | 296                                               | 475                     | 170                  | 60             | 0    | 1000  | 105                                                  | 25     |
| all-India                                               | 177                                               | 348                     | 312                  | 133            | 30   | 1000  | 11565                                                | 762    |
| estd. no. of aged living alone or with spouse only (00) | 2051                                              | 4023                    | 3603                 | 1543           | 345  | 11565 | X                                                    | X      |
| sample aged living alone or with spouse only            | 157                                               | 279                     | 197                  | 110            | 19   | 762   | X                                                    | X      |

Table (15): Per 1000 distribution of aged persons living alone or living with spouse only by location of residence of any child/ grandchild or sibling for each sex

| Urban<br>state/ut                                             | location of residence of child/grandchild/sibling |                                   |                             |                   |      |       | Persons<br>no. of aged<br>persons living<br>alone or with<br>spouse only |        |
|---------------------------------------------------------------|---------------------------------------------------|-----------------------------------|-----------------------------|-------------------|------|-------|--------------------------------------------------------------------------|--------|
|                                                               | within the<br>same<br>building                    | within<br>the<br>village/<br>town | outside<br>village/to<br>wn | not<br>applicable | n.r. | total | estd.<br>(00)                                                            | sample |
|                                                               | (1)                                               | (2)                               | (3)                         | (4)               | (5)  | (6)   | (7)                                                                      | (8)    |
| Andhra Pradesh                                                | 212                                               | 312                               | 364                         | 113               | 0    | 1000  | 2435                                                                     | 169    |
| Arunachal Pradesh                                             | 393                                               | 120                               | 282                         | 0                 | 205  | 1000  | 2                                                                        | 13     |
| Assam                                                         | 92                                                | 0                                 | 319                         | 336               | 252  | 1000  | 23                                                                       | 5      |
| Bihar                                                         | 353                                               | 179                               | 152                         | 85                | 231  | 1000  | 399                                                                      | 31     |
| Chhattisgarh                                                  | 254                                               | 352                               | 0                           | 394               | 0    | 1000  | 168                                                                      | 20     |
| Delhi                                                         | 166                                               | 384                               | 269                         | 181               | 0    | 1000  | 619                                                                      | 58     |
| Goa                                                           | 69                                                | 443                               | 419                         | 69                | 0    | 1000  | 81                                                                       | 11     |
| Gujarat                                                       | 154                                               | 260                               | 462                         | 124               | 0    | 1000  | 1486                                                                     | 80     |
| Haryana                                                       | 409                                               | 194                               | 397                         | 0                 | 0    | 1000  | 435                                                                      | 30     |
| Himachal Pradesh                                              | 0                                                 | 622                               | 120                         | 0                 | 258  | 1000  | 30                                                                       | 5      |
| Jammu & Kashmir                                               | 323                                               | 271                               | 180                         | 226               | 0    | 1000  | 103                                                                      | 21     |
| Jharkhand                                                     | 47                                                | 27                                | 635                         | 68                | 223  | 1000  | 209                                                                      | 27     |
| Karnataka                                                     | 151                                               | 270                               | 449                         | 131               | 0    | 1000  | 838                                                                      | 70     |
| Kerala                                                        | 68                                                | 372                               | 357                         | 203               | 0    | 1000  | 1275                                                                     | 79     |
| Madhya Pradesh                                                | 203                                               | 372                               | 218                         | 173               | 34   | 1000  | 1029                                                                     | 91     |
| Maharashtra                                                   | 192                                               | 226                               | 448                         | 113               | 20   | 1000  | 3955                                                                     | 143    |
| Manipur                                                       | 706                                               | 73                                | 221                         | 0                 | 0    | 1000  | 22                                                                       | 12     |
| Meghalaya                                                     | 204                                               | 611                               | 185                         | 0                 | 0    | 1000  | 8                                                                        | 6      |
| Mizoram                                                       | 54                                                | 457                               | 83                          | 125               | 281  | 1000  | 6                                                                        | 13     |
| Nagaland                                                      | 0                                                 | 0                                 | 0                           | 0                 | 0    | 0     | 0                                                                        | 0      |
| Orissa                                                        | 94                                                | 418                               | 214                         | 80                | 194  | 1000  | 390                                                                      | 37     |
| Punjab                                                        | 307                                               | 311                               | 278                         | 92                | 12   | 1000  | 522                                                                      | 37     |
| Rajasthan                                                     | 323                                               | 358                               | 217                         | 103               | 0    | 1000  | 846                                                                      | 68     |
| Sikkim                                                        | 0                                                 | 0                                 | 0                           | 0                 | 0    | 0     | 0                                                                        | 0      |
| Tamil Nadu                                                    | 106                                               | 453                               | 281                         | 160               | 0    | 1000  | 4017                                                                     | 238    |
| Tripura                                                       | 490                                               | 49                                | 23                          | 261               | 177  | 1000  | 31                                                                       | 14     |
| Uttaranchal                                                   | 59                                                | 257                               | 577                         | 106               | 0    | 1000  | 209                                                                      | 20     |
| Uttar Pradesh                                                 | 196                                               | 170                               | 359                         | 173               | 102  | 1000  | 2403                                                                     | 172    |
| West Bengal                                                   | 101                                               | 350                               | 352                         | 154               | 43   | 1000  | 1982                                                                     | 118    |
| A & N Islands                                                 | 0                                                 | 1000                              | 0                           | 0                 | 0    | 1000  | 0                                                                        | 1      |
| Chandigarh                                                    | 221                                               | 236                               | 458                         | 85                | 0    | 1000  | 84                                                                       | 21     |
| Dadra & N. Haveli                                             | 0                                                 | 943                               | 57                          | 0                 | 0    | 1000  | 1                                                                        | 4      |
| Daman & Diu                                                   | 0                                                 | 294                               | 544                         | 162               | 0    | 1000  | 4                                                                        | 4      |
| Lakshadweep                                                   | 0                                                 | 688                               | 0                           | 312               | 0    | 1000  | 2                                                                        | 3      |
| Pondicherry                                                   | 325                                               | 578                               | 50                          | 47                | 0    | 1000  | 102                                                                      | 18     |
| ONES                                                          | 483                                               | 161                               | 117                         | 128               | 110  | 1000  | 69                                                                       | 58     |
| GUTs                                                          | 267                                               | 426                               | 237                         | 69                | 0    | 1000  | 193                                                                      | 51     |
| all-India                                                     | 173                                               | 310                               | 349                         | 139               | 29   | 1000  | 23715                                                                    | 1639   |
| estd. no. of aged living<br>alone or with spouse only<br>(00) | 4104                                              | 7361                              | 8273                        | 3290              | 687  | 23715 | X                                                                        | X      |
| sample aged living alone<br>or with spouse only               | 335                                               | 529                               | 484                         | 243               | 48   | 1639  | X                                                                        | X      |

Table (15): Per 1000 distribution of aged persons living alone or living with spouse only by location of residence of any child/ grandchild or sibling for each sex

| Rural + Urban                                           |                                                   |                         |                      |                |      |       | Males                                                |        |
|---------------------------------------------------------|---------------------------------------------------|-------------------------|----------------------|----------------|------|-------|------------------------------------------------------|--------|
| state/ut                                                | location of residence of child/grandchild/sibling |                         |                      |                |      |       | no. of aged persons living alone or with spouse only |        |
|                                                         | within the same building                          | within the village/town | outside village/town | not applicable | n.r. | total | estd. (00)                                           | sample |
| (1)                                                     | (2)                                               | (3)                     | (4)                  | (5)            | (6)  | (7)   | (8)                                                  | (9)    |
| Andhra Pradesh                                          | 220                                               | 410                     | 265                  | 93             | 12   | 1000  | 8056                                                 | 329    |
| Arunachal Pradesh                                       | 293                                               | 211                     | 149                  | 75             | 272  | 1000  | 16                                                   | 18     |
| Assam                                                   | 120                                               | 287                     | 385                  | 26             | 181  | 1000  | 297                                                  | 35     |
| Bihar                                                   | 247                                               | 306                     | 174                  | 134            | 139  | 1000  | 3540                                                 | 206    |
| Chhattisgarh                                            | 222                                               | 407                     | 146                  | 222            | 4    | 1000  | 1040                                                 | 52     |
| Delhi                                                   | 126                                               | 346                     | 303                  | 226            | 0    | 1000  | 316                                                  | 31     |
| Goa                                                     | 35                                                | 0                       | 965                  | 0              | 0    | 1000  | 160                                                  | 7      |
| Gujarat                                                 | 163                                               | 337                     | 406                  | 94             | 0    | 1000  | 3005                                                 | 125    |
| Haryana                                                 | 328                                               | 356                     | 256                  | 59             | 0    | 1000  | 575                                                  | 33     |
| Himachal Pradesh                                        | 228                                               | 221                     | 330                  | 190            | 31   | 1000  | 441                                                  | 62     |
| Jammu & Kashmir                                         | 158                                               | 551                     | 149                  | 142            | 0    | 1000  | 136                                                  | 23     |
| Jharkhand                                               | 154                                               | 477                     | 198                  | 123            | 48   | 1000  | 1234                                                 | 93     |
| Karnataka                                               | 125                                               | 308                     | 443                  | 124            | 0    | 1000  | 2267                                                 | 94     |
| Kerala                                                  | 79                                                | 324                     | 378                  | 219            | 0    | 1000  | 2321                                                 | 110    |
| Madhya Pradesh                                          | 187                                               | 461                     | 210                  | 133            | 10   | 1000  | 3774                                                 | 169    |
| Maharashtra                                             | 257                                               | 304                     | 328                  | 106            | 6    | 1000  | 6718                                                 | 207    |
| Manipur                                                 | 578                                               | 161                     | 94                   | 118            | 49   | 1000  | 50                                                   | 27     |
| Meghalaya                                               | 27                                                | 362                     | 134                  | 324            | 153  | 1000  | 68                                                   | 17     |
| Mizoram                                                 | 0                                                 | 628                     | 54                   | 135            | 183  | 1000  | 10                                                   | 13     |
| Nagaland                                                | 0                                                 | 708                     | 292                  | 0              | 0    | 1000  | 14                                                   | 8      |
| Orissa                                                  | 199                                               | 275                     | 262                  | 166            | 99   | 1000  | 2711                                                 | 122    |
| Punjab                                                  | 325                                               | 309                     | 311                  | 53             | 3    | 1000  | 1197                                                 | 50     |
| Rajasthan                                               | 241                                               | 346                     | 288                  | 125            | 0    | 1000  | 2124                                                 | 123    |
| Sikkim                                                  | 0                                                 | 673                     | 197                  | 129            | 0    | 1000  | 8                                                    | 9      |
| Tamil Nadu                                              | 126                                               | 465                     | 340                  | 69             | 0    | 1000  | 8035                                                 | 316    |
| Tripura                                                 | 623                                               | 100                     | 71                   | 165            | 40   | 1000  | 263                                                  | 53     |
| Uttaranchal                                             | 181                                               | 99                      | 623                  | 96             | 0    | 1000  | 559                                                  | 30     |
| Uttar Pradesh                                           | 180                                               | 291                     | 263                  | 169            | 97   | 1000  | 7728                                                 | 368    |
| West Bengal                                             | 269                                               | 281                     | 267                  | 149            | 36   | 1000  | 3348                                                 | 157    |
| A & N Islands                                           | 0                                                 | 0                       | 1000                 | 0              | 0    | 1000  | 3                                                    | 3      |
| Chandigarh                                              | 193                                               | 226                     | 536                  | 45             | 0    | 1000  | 43                                                   | 16     |
| Dadra & N. Haveli                                       | 385                                               | 609                     | 6                    | 0              | 0    | 1000  | 6                                                    | 6      |
| Daman & Diu                                             | 69                                                | 536                     | 0                    | 395            | 0    | 1000  | 3                                                    | 5      |
| Lakshadweep                                             | 0                                                 | 803                     | 197                  | 0              | 0    | 1000  | 1                                                    | 2      |
| Pondicherry                                             | 142                                               | 394                     | 336                  | 129            | 0    | 1000  | 112                                                  | 17     |
| ONES                                                    | 466                                               | 194                     | 96                   | 175            | 69   | 1000  | 427                                                  | 145    |
| GUTs                                                    | 158                                               | 356                     | 382                  | 104            | 0    | 1000  | 168                                                  | 49     |
| all-India                                               | 198                                               | 352                     | 294                  | 123            | 33   | 1000  | 60179                                                | 2936   |
| estd. no. of aged living alone or with spouse only (00) | 11915                                             | 21188                   | 17717                | 7388           | 1972 | 60179 | X                                                    | X      |
| sample aged living alone or with spouse only            | 622                                               | 997                     | 818                  | 391            | 108  | 2936  | X                                                    | X      |

Table (15): Per 1000 distribution of aged persons living alone or living with spouse only by location of residence of any child/ grandchild or sibling for each sex

| Rural + Urban                                           |                                                   |                         |                      |                |      |       | Females                                              |        |
|---------------------------------------------------------|---------------------------------------------------|-------------------------|----------------------|----------------|------|-------|------------------------------------------------------|--------|
| state/ut                                                | location of residence of child/grandchild/sibling |                         |                      |                |      |       | no. of aged persons living alone or with spouse only |        |
|                                                         | within the same building                          | within the village/town | outside village/town | not applicable | n.r. | total | estd. (00)                                           | sample |
| (1)                                                     | (2)                                               | (3)                     | (4)                  | (5)            | (6)  | (7)   | (8)                                                  | (9)    |
| Andhra Pradesh                                          | 158                                               | 490                     | 272                  | 70             | 10   | 1000  | 6721                                                 | 256    |
| Arunachal Pradesh                                       | 687                                               | 93                      | 153                  | 54             | 13   | 1000  | 15                                                   | 17     |
| Assam                                                   | 227                                               | 267                     | 292                  | 55             | 158  | 1000  | 408                                                  | 38     |
| Bihar                                                   | 228                                               | 221                     | 262                  | 152            | 137  | 1000  | 2429                                                 | 135    |
| Chhattisgarh                                            | 185                                               | 440                     | 131                  | 220            | 24   | 1000  | 1507                                                 | 72     |
| Delhi                                                   | 200                                               | 447                     | 224                  | 129            | 0    | 1000  | 316                                                  | 28     |
| Goa                                                     | 22                                                | 259                     | 679                  | 40             | 0    | 1000  | 139                                                  | 10     |
| Gujarat                                                 | 143                                               | 374                     | 356                  | 126            | 0    | 1000  | 2903                                                 | 121    |
| Haryana                                                 | 276                                               | 329                     | 353                  | 42             | 0    | 1000  | 608                                                  | 36     |
| Himachal Pradesh                                        | 220                                               | 257                     | 395                  | 128            | 0    | 1000  | 294                                                  | 46     |
| Jammu & Kashmir                                         | 291                                               | 465                     | 147                  | 97             | 0    | 1000  | 117                                                  | 21     |
| Jharkhand                                               | 76                                                | 325                     | 303                  | 219            | 77   | 1000  | 571                                                  | 45     |
| Karnataka                                               | 181                                               | 279                     | 386                  | 154            | 0    | 1000  | 2187                                                 | 91     |
| Kerala                                                  | 29                                                | 463                     | 306                  | 186            | 17   | 1000  | 2044                                                 | 98     |
| Madhya Pradesh                                          | 243                                               | 414                     | 210                  | 128            | 5    | 1000  | 3630                                                 | 155    |
| Maharashtra                                             | 205                                               | 301                     | 352                  | 125            | 17   | 1000  | 6963                                                 | 196    |
| Manipur                                                 | 296                                               | 394                     | 219                  | 91             | 0    | 1000  | 16                                                   | 9      |
| Meghalaya                                               | 106                                               | 373                     | 12                   | 85             | 424  | 1000  | 62                                                   | 15     |
| Mizoram                                                 | 190                                               | 603                     | 0                    | 0              | 206  | 1000  | 2                                                    | 5      |
| Nagaland                                                | 0                                                 | 636                     | 364                  | 0              | 0    | 1000  | 6                                                    | 3      |
| Orissa                                                  | 197                                               | 401                     | 261                  | 72             | 70   | 1000  | 1593                                                 | 75     |
| Punjab                                                  | 313                                               | 240                     | 422                  | 22             | 3    | 1000  | 1065                                                 | 43     |
| Rajasthan                                               | 191                                               | 442                     | 246                  | 120            | 0    | 1000  | 2047                                                 | 108    |
| Sikkim                                                  | 0                                                 | 528                     | 423                  | 50             | 0    | 1000  | 8                                                    | 6      |
| Tamil Nadu                                              | 66                                                | 555                     | 292                  | 87             | 0    | 1000  | 7186                                                 | 282    |
| Tripura                                                 | 538                                               | 161                     | 162                  | 139            | 0    | 1000  | 157                                                  | 30     |
| Uttaranchal                                             | 28                                                | 298                     | 604                  | 70             | 0    | 1000  | 698                                                  | 33     |
| Uttar Pradesh                                           | 182                                               | 274                     | 284                  | 133            | 127  | 1000  | 6692                                                 | 305    |
| West Bengal                                             | 239                                               | 419                     | 224                  | 101            | 18   | 1000  | 2677                                                 | 127    |
| A & N Islands                                           | 0                                                 | 35                      | 965                  | 0              | 0    | 1000  | 5                                                    | 3      |
| Chandigarh                                              | 235                                               | 296                     | 345                  | 123            | 0    | 1000  | 45                                                   | 13     |
| Dadra & N. Haveli                                       | 572                                               | 19                      | 0                    | 409            | 0    | 1000  | 4                                                    | 3      |
| Daman & Diu                                             | 92                                                | 609                     | 300                  | 0              | 0    | 1000  | 8                                                    | 8      |
| Lakshadweep                                             | 0                                                 | 620                     | 0                    | 380            | 0    | 1000  | 2                                                    | 4      |
| Pondicherry                                             | 273                                               | 473                     | 125                  | 128            | 0    | 1000  | 76                                                   | 11     |
| ONES                                                    | 400                                               | 246                     | 142                  | 112            | 101  | 1000  | 265                                                  | 85     |
| GUTs                                                    | 245                                               | 397                     | 232                  | 126            | 0    | 1000  | 140                                                  | 42     |
| all-India                                               | 171                                               | 387                     | 294                  | 115            | 33   | 1000  | 53198                                                | 2448   |
| estd. no. of aged living alone or with spouse only (00) | 9072                                              | 20610                   | 15635                | 6128           | 1754 | 53198 | X                                                    | X      |
| sample aged living alone or with spouse only            | 480                                               | 930                     | 655                  | 300            | 83   | 2448  | X                                                    | X      |

Table (15): Per 1000 distribution of aged persons living alone or living with spouse only by location of residence of any child/ grandchild or sibling for each sex

| Rural + Urban                                           |                                                   |                         |                      |                |      |        | Persons                                              |        |
|---------------------------------------------------------|---------------------------------------------------|-------------------------|----------------------|----------------|------|--------|------------------------------------------------------|--------|
| state/ut                                                | location of residence of child/grandchild/sibling |                         |                      |                |      |        | no. of aged persons living alone or with spouse only |        |
|                                                         | within the same building                          | within the village/town | outside village/town | not applicable | n.r. | total  | estd. (00)                                           | sample |
| (1)                                                     | (2)                                               | (3)                     | (4)                  | (5)            | (6)  | (7)    | (8)                                                  | (9)    |
| Andhra Pradesh                                          | 192                                               | 446                     | 268                  | 82             | 11   | 1000   | 14777                                                | 585    |
| Arunachal Pradesh                                       | 480                                               | 155                     | 151                  | 65             | 149  | 1000   | 31                                                   | 35     |
| Assam                                                   | 182                                               | 276                     | 331                  | 43             | 168  | 1000   | 705                                                  | 73     |
| Bihar                                                   | 239                                               | 272                     | 210                  | 141            | 138  | 1000   | 5969                                                 | 341    |
| Chhattisgarh                                            | 200                                               | 427                     | 137                  | 221            | 16   | 1000   | 2547                                                 | 124    |
| Delhi                                                   | 163                                               | 396                     | 263                  | 177            | 0    | 1000   | 631                                                  | 59     |
| Goa                                                     | 29                                                | 120                     | 832                  | 19             | 0    | 1000   | 299                                                  | 17     |
| Gujarat                                                 | 153                                               | 355                     | 382                  | 110            | 0    | 1000   | 5908                                                 | 246    |
| Haryana                                                 | 302                                               | 342                     | 306                  | 50             | 0    | 1000   | 1183                                                 | 69     |
| Himachal Pradesh                                        | 225                                               | 235                     | 356                  | 165            | 19   | 1000   | 736                                                  | 108    |
| Jammu & Kashmir                                         | 219                                               | 511                     | 148                  | 121            | 0    | 1000   | 254                                                  | 44     |
| Jharkhand                                               | 129                                               | 429                     | 231                  | 153            | 57   | 1000   | 1805                                                 | 138    |
| Karnataka                                               | 152                                               | 294                     | 415                  | 139            | 0    | 1000   | 4454                                                 | 185    |
| Kerala                                                  | 56                                                | 389                     | 344                  | 203            | 8    | 1000   | 4365                                                 | 208    |
| Madhya Pradesh                                          | 214                                               | 438                     | 210                  | 131            | 8    | 1000   | 7403                                                 | 324    |
| Maharashtra                                             | 231                                               | 302                     | 340                  | 116            | 11   | 1000   | 13681                                                | 403    |
| Manipur                                                 | 509                                               | 218                     | 125                  | 112            | 37   | 1000   | 66                                                   | 36     |
| Meghalaya                                               | 65                                                | 367                     | 76                   | 210            | 282  | 1000   | 129                                                  | 32     |
| Mizoram                                                 | 29                                                | 624                     | 46                   | 114            | 186  | 1000   | 11                                                   | 18     |
| Nagaland                                                | 0                                                 | 685                     | 315                  | 0              | 0    | 1000   | 20                                                   | 11     |
| Orissa                                                  | 198                                               | 321                     | 261                  | 131            | 88   | 1000   | 4304                                                 | 197    |
| Punjab                                                  | 319                                               | 276                     | 363                  | 38             | 3    | 1000   | 2262                                                 | 93     |
| Rajasthan                                               | 216                                               | 393                     | 267                  | 123            | 0    | 1000   | 4171                                                 | 231    |
| Sikkim                                                  | 0                                                 | 598                     | 313                  | 88             | 0    | 1000   | 16                                                   | 15     |
| Tamil Nadu                                              | 98                                                | 508                     | 317                  | 78             | 0    | 1000   | 15222                                                | 598    |
| Tripura                                                 | 592                                               | 123                     | 105                  | 156            | 25   | 1000   | 419                                                  | 83     |
| Uttaranchal                                             | 96                                                | 210                     | 612                  | 82             | 0    | 1000   | 1257                                                 | 63     |
| Uttar Pradesh                                           | 181                                               | 283                     | 272                  | 152            | 111  | 1000   | 14420                                                | 673    |
| West Bengal                                             | 256                                               | 342                     | 247                  | 127            | 28   | 1000   | 6025                                                 | 284    |
| A & N Islands                                           | 0                                                 | 22                      | 978                  | 0              | 0    | 1000   | 8                                                    | 6      |
| Chandigarh                                              | 215                                               | 262                     | 438                  | 85             | 0    | 1000   | 87                                                   | 29     |
| Dadra & N. Haveli                                       | 460                                               | 372                     | 3                    | 165            | 0    | 1000   | 10                                                   | 9      |
| Daman & Diu                                             | 86                                                | 591                     | 227                  | 95             | 0    | 1000   | 11                                                   | 13     |
| Lakshadweep                                             | 0                                                 | 683                     | 67                   | 250            | 0    | 1000   | 3                                                    | 6      |
| Pondicherry                                             | 195                                               | 426                     | 251                  | 128            | 0    | 1000   | 188                                                  | 28     |
| ONES                                                    | 441                                               | 214                     | 113                  | 151            | 81   | 1000   | 693                                                  | 230    |
| GUTs                                                    | 197                                               | 375                     | 314                  | 114            | 0    | 1000   | 307                                                  | 91     |
| all-India                                               | 185                                               | 369                     | 294                  | 119            | 33   | 1000   | 113377                                               | 5384   |
| estd. no. of aged living alone or with spouse only (00) | 20986                                             | 41798                   | 33352                | 13515          | 3726 | 113377 | X                                                    | X      |
| sample aged living alone or with spouse only            | 1102                                              | 1927                    | 1473                 | 691            | 191  | 5384   | X                                                    | X      |

Table (16): Per 1000 distribution of aged persons by state of physical mobility for each age-group and sex

| all-India<br>age-group | state of physical mobility of aged |                    |                     |       |        | Rural                             |        |
|------------------------|------------------------------------|--------------------|---------------------|-------|--------|-----------------------------------|--------|
|                        | mobile                             | immobile           |                     | n.r.  | total  | no. of aged persons<br>estd. (00) | sample |
|                        |                                    | confined to<br>bed | confined to<br>home |       |        |                                   |        |
| (1)                    | (2)                                | (3)                | (4)                 | (5)   | (6)    | (7)                               | (8)    |
| male                   |                                    |                    |                     |       |        |                                   |        |
| 60-64                  | 950                                | 4                  | 23                  | 23    | 1000   | 92678                             | 4200   |
| 64-69                  | 938                                | 7                  | 44                  | 11    | 1000   | 71760                             | 3262   |
| 70-74                  | 904                                | 16                 | 63                  | 18    | 1000   | 47686                             | 2164   |
| 75-79                  | 869                                | 23                 | 94                  | 14    | 1000   | 18822                             | 903    |
| 80 & above             | 724                                | 49                 | 171                 | 57    | 1000   | 22308                             | 999    |
| all aged               | 912                                | 12                 | 55                  | 21    | 1000   | 253254                            | 11528  |
| estd. no. of aged (00) | 230926                             | 3160               | 13889               | 5278  | 253254 | X                                 | X      |
| sample aged            | 10305                              | 212                | 746                 | 265   | 11528  | X                                 | X      |
| female                 |                                    |                    |                     |       |        |                                   |        |
| 60-64                  | 944                                | 3                  | 31                  | 22    | 1000   | 91693                             | 3971   |
| 64-69                  | 934                                | 6                  | 44                  | 15    | 1000   | 74886                             | 3201   |
| 70-74                  | 852                                | 20                 | 112                 | 16    | 1000   | 46859                             | 1970   |
| 75-79                  | 818                                | 33                 | 130                 | 19    | 1000   | 16962                             | 744    |
| 80 & above             | 632                                | 69                 | 257                 | 41    | 1000   | 19015                             | 851    |
| all aged               | 891                                | 14                 | 74                  | 20    | 1000   | 249416                            | 10737  |
| estd. no. of aged (00) | 222326                             | 3585               | 18462               | 5043  | 249416 | X                                 | X      |
| sample aged            | 9376                               | 194                | 904                 | 263   | 10737  | X                                 | X      |
| persons                |                                    |                    |                     |       |        |                                   |        |
| 60-64                  | 947                                | 4                  | 27                  | 23    | 1000   | 184371                            | 8171   |
| 64-69                  | 936                                | 7                  | 44                  | 13    | 1000   | 146646                            | 6463   |
| 70-74                  | 878                                | 18                 | 87                  | 17    | 1000   | 94546                             | 4134   |
| 75-79                  | 845                                | 28                 | 111                 | 16    | 1000   | 35784                             | 1647   |
| 80 & above             | 682                                | 58                 | 211                 | 49    | 1000   | 41323                             | 1850   |
| all aged               | 902                                | 13                 | 64                  | 21    | 1000   | 502670                            | 22265  |
| estd. no. of aged (00) | 453253                             | 6745               | 32351               | 10321 | 502670 | X                                 | X      |
| sample aged            | 19681                              | 406                | 1650                | 528   | 22265  | X                                 | X      |

Table (16): Per 1000 distribution of aged persons by state of physical mobility for each age-group and sex

| all-India<br>age-group | state of physical mobility of aged |                    |                     |      |        | Urban                             |        |
|------------------------|------------------------------------|--------------------|---------------------|------|--------|-----------------------------------|--------|
|                        | mobile                             | immobile           |                     | n.r. | total  | no. of aged persons<br>estd. (00) | sample |
|                        |                                    | confined to<br>bed | confined to<br>home |      |        |                                   |        |
| (1)                    | (2)                                | (3)                | (4)                 | (5)  | (6)    | (7)                               | (8)    |
| male                   |                                    |                    |                     |      |        |                                   |        |
| 60-64                  | 952                                | 8                  | 25                  | 15   | 1000   | 27406                             | 2199   |
| 64-69                  | 951                                | 11                 | 23                  | 15   | 1000   | 21927                             | 1719   |
| 70-74                  | 912                                | 18                 | 59                  | 11   | 1000   | 14634                             | 1186   |
| 75-79                  | 885                                | 18                 | 95                  | 3    | 1000   | 7322                              | 569    |
| 80 & above             | 727                                | 69                 | 170                 | 34   | 1000   | 7462                              | 549    |
| all aged               | 917                                | 17                 | 51                  | 15   | 1000   | 78751                             | 6222   |
| estd. no. of aged (00) | 72193                              | 1348               | 4034                | 1177 | 78751  | X                                 | X      |
| sample aged            | 5628                               | 125                | 352                 | 117  | 6222   | X                                 | X      |
| female                 |                                    |                    |                     |      |        |                                   |        |
| 60-64                  | 940                                | 5                  | 29                  | 25   | 1000   | 28628                             | 2156   |
| 64-69                  | 925                                | 8                  | 58                  | 10   | 1000   | 24032                             | 1838   |
| 70-74                  | 881                                | 20                 | 96                  | 3    | 1000   | 14463                             | 1164   |
| 75-79                  | 797                                | 28                 | 157                 | 18   | 1000   | 6941                              | 549    |
| 80 & above             | 657                                | 69                 | 254                 | 20   | 1000   | 8295                              | 637    |
| all aged               | 885                                | 17                 | 83                  | 16   | 1000   | 82359                             | 6344   |
| estd. no. of aged (00) | 72859                              | 1394               | 6817                | 1288 | 82359  | X                                 | X      |
| sample aged            | 5512                               | 135                | 556                 | 141  | 6344   | X                                 | X      |
| persons                |                                    |                    |                     |      |        |                                   |        |
| 60-64                  | 946                                | 6                  | 27                  | 20   | 1000   | 56034                             | 4355   |
| 64-69                  | 938                                | 9                  | 41                  | 12   | 1000   | 45959                             | 3557   |
| 70-74                  | 896                                | 19                 | 78                  | 7    | 1000   | 29097                             | 2350   |
| 75-79                  | 842                                | 22                 | 125                 | 10   | 1000   | 14263                             | 1118   |
| 80 & above             | 690                                | 69                 | 214                 | 26   | 1000   | 15757                             | 1186   |
| all aged               | 900                                | 17                 | 67                  | 15   | 1000   | 161110                            | 12566  |
| estd. no. of aged (00) | 145052                             | 2742               | 10851               | 2464 | 161110 | X                                 | X      |
| sample aged            | 11140                              | 260                | 908                 | 258  | 12566  | X                                 | X      |



Table (16): Per 1000 distribution of aged persons by state of physical mobility for each age-group and sex

| all-India<br>age-group | state of physical mobility of aged |                    |                     |       |        | Rural+Urban                       |        |
|------------------------|------------------------------------|--------------------|---------------------|-------|--------|-----------------------------------|--------|
|                        | mobile                             | immobile           |                     | n.r.  | total  | no. of aged persons<br>estd. (00) | sample |
|                        |                                    | confined to<br>bed | confined to<br>home |       |        |                                   |        |
| (1)                    | (2)                                | (3)                | (4)                 | (5)   | (6)    | (7)                               | (8)    |
| male                   |                                    |                    |                     |       |        |                                   |        |
| 60-64                  | 950                                | 5                  | 24                  | 21    | 1000   | 120083                            | 6399   |
| 64-69                  | 941                                | 8                  | 39                  | 12    | 1000   | 93687                             | 4981   |
| 70-74                  | 906                                | 16                 | 62                  | 16    | 1000   | 62320                             | 3350   |
| 75-79                  | 873                                | 21                 | 94                  | 11    | 1000   | 26145                             | 1472   |
| 80 & above             | 725                                | 54                 | 171                 | 51    | 1000   | 29769                             | 1548   |
| all aged               | 913                                | 14                 | 54                  | 19    | 1000   | 332005                            | 17750  |
| estd. no. of aged (00) | 303119                             | 4508               | 17923               | 6455  | 332005 | X                                 | X      |
| sample aged            | 15933                              | 337                | 1098                | 382   | 17750  | X                                 | X      |
| female                 |                                    |                    |                     |       |        |                                   |        |
| 60-64                  | 943                                | 4                  | 30                  | 23    | 1000   | 120321                            | 6127   |
| 64-69                  | 932                                | 6                  | 47                  | 14    | 1000   | 98918                             | 5039   |
| 70-74                  | 859                                | 20                 | 108                 | 13    | 1000   | 61322                             | 3134   |
| 75-79                  | 812                                | 32                 | 138                 | 18    | 1000   | 23903                             | 1293   |
| 80 & above             | 640                                | 69                 | 256                 | 35    | 1000   | 27310                             | 1488   |
| all aged               | 890                                | 15                 | 76                  | 19    | 1000   | 331775                            | 17081  |
| estd. no. of aged (00) | 295186                             | 4980               | 25279               | 6330  | 331775 | X                                 | X      |
| sample aged            | 14888                              | 329                | 1460                | 404   | 17081  | X                                 | X      |
| persons                |                                    |                    |                     |       |        |                                   |        |
| 60-64                  | 947                                | 4                  | 27                  | 22    | 1000   | 240405                            | 12526  |
| 64-69                  | 936                                | 7                  | 43                  | 13    | 1000   | 192605                            | 10020  |
| 70-74                  | 882                                | 18                 | 85                  | 14    | 1000   | 123643                            | 6484   |
| 75-79                  | 844                                | 26                 | 115                 | 15    | 1000   | 50048                             | 2765   |
| 80 & above             | 684                                | 61                 | 212                 | 43    | 1000   | 57080                             | 3036   |
| all aged               | 901                                | 14                 | 65                  | 19    | 1000   | 663779                            | 34831  |
| estd. no. of aged (00) | 598305                             | 9488               | 43202               | 12785 | 663779 | X                                 | X      |
| sample aged            | 30821                              | 666                | 2558                | 786   | 34831  | X                                 | X      |

1  
2  
3  
4  
5  
6  
7  
8  
9  
10  
11  
12  
13  
14  
15  
16  
17  
18  
19  
20  
21  
22  
23  
24  
25  
26  
27  
28  
29  
30  
31  
32  
33  
34  
35  
36  
37  
38  
39  
40  
41  
42  
43  
44  
45  
46  
47

Table (17.1): Per 1000 distribution of aged persons with illness or otherwise by their perception about current state of health for each quintile class and sex

| all-India                      |                                                | Rural                                        |            |       |      |       |                                              |            |       |      |        | Males               |        |
|--------------------------------|------------------------------------------------|----------------------------------------------|------------|-------|------|-------|----------------------------------------------|------------|-------|------|--------|---------------------|--------|
| mpce class                     | no. per 1000 of aged persons reporting illness | aged person with illness                     |            |       |      |       | aged person without illness                  |            |       |      |        | no. of aged persons |        |
|                                |                                                | own perception about current state of health |            |       |      |       | own perception about current state of health |            |       |      |        |                     |        |
|                                |                                                | excellent/very good                          | good/ fair | poor  | n.r. | total | excellent/very good                          | good/ fair | poor  | n.r. | total  | estd. (00)          | sample |
| (1)                            | (2)                                            | (3)                                          | (4)        | (5)   | (6)  | (7)   | (8)                                          | (9)        | (10)  | (11) | (12)   | (13)                | (14)   |
| 0 – 225                        | 280                                            | 3                                            | 457        | 493   | 47   | 1000  | 41                                           | 710        | 161   | 88   | 1000   | 9537                | 399    |
| 225 – 255                      | 191                                            | 0                                            | 432        | 486   | 81   | 1000  | 34                                           | 703        | 205   | 58   | 1000   | 8411                | 302    |
| 255 – 300                      | 216                                            | 4                                            | 480        | 478   | 38   | 1000  | 67                                           | 724        | 147   | 62   | 1000   | 20867               | 805    |
| 300 – 340                      | 213                                            | 0                                            | 518        | 480   | 1    | 1000  | 85                                           | 655        | 196   | 64   | 1000   | 17295               | 744    |
| 340 – 380                      | 257                                            | 4                                            | 606        | 390   | 0    | 1000  | 53                                           | 703        | 176   | 67   | 1000   | 22031               | 964    |
| 380 – 420                      | 273                                            | 4                                            | 534        | 450   | 12   | 1000  | 73                                           | 728        | 153   | 46   | 1000   | 24050               | 1046   |
| 420 – 470                      | 299                                            | 61                                           | 497        | 407   | 34   | 1000  | 74                                           | 756        | 137   | 34   | 1000   | 26188               | 1184   |
| 470 – 525                      | 284                                            | 10                                           | 575        | 384   | 31   | 1000  | 50                                           | 725        | 153   | 72   | 1000   | 27442               | 1281   |
| 525 – 615                      | 283                                            | 7                                            | 568        | 408   | 17   | 1000  | 102                                          | 748        | 103   | 47   | 1000   | 31708               | 1492   |
| 615 – 775                      | 342                                            | 16                                           | 631        | 340   | 13   | 1000  | 79                                           | 753        | 114   | 54   | 1000   | 32712               | 1576   |
| 775 – 950                      | 357                                            | 38                                           | 641        | 308   | 13   | 1000  | 136                                          | 766        | 88    | 9    | 1000   | 14637               | 810    |
| 950 +                          | 455                                            | 41                                           | 641        | 318   | 0    | 1000  | 122                                          | 774        | 70    | 34   | 1000   | 18376               | 925    |
| all classes                    | 292                                            | 19                                           | 569        | 393   | 19   | 1000  | 77                                           | 731        | 139   | 53   | 1000   | 253254              |        |
| estd. no. of aged persons (00) | 253254                                         | 1415                                         | 42171      | 29092 | 1391 | 74068 | 13773                                        | 130933     | 24989 | 9491 | 179186 | X                   | X      |
| sample aged persons            | 11528                                          | 61                                           | 1785       | 1485  | 70   | 3401  | 630                                          | 5782       | 1223  | 492  | 8127   | X                   | X      |

Table (17.1): Per 1000 distribution of aged persons with illness or otherwise by their perception about current state of health for each quintile class and sex

| all-India                      |                                                | Rural                                        |            |       |      |       |                                              |            |       |      |        | Females             |        |
|--------------------------------|------------------------------------------------|----------------------------------------------|------------|-------|------|-------|----------------------------------------------|------------|-------|------|--------|---------------------|--------|
| mpce class                     | no. per 1000 of aged persons reporting illness | aged person with illness                     |            |       |      |       | aged person without illness                  |            |       |      |        | no. of aged persons |        |
|                                |                                                | own perception about current state of health |            |       |      |       | own perception about current state of health |            |       |      |        | estd. (00)          | sample |
|                                |                                                | excellent/very good                          | good/ fair | poor  | n.r. | total | excellent/very good                          | good/ fair | poor  | n.r. | total  |                     |        |
| (1)                            | (2)                                            | (3)                                          | (4)        | (5)   | (6)  | (7)   | (8)                                          | (9)        | (10)  | (11) | (12)   | (13)                | (14)   |
| 0 – 225                        | 206                                            | 31                                           | 361        | 606   | 3    | 1000  | 35                                           | 709        | 191   | 65   | 1000   | 11222               | 415    |
| 225 – 255                      | 188                                            | 0                                            | 371        | 629   | 0    | 1000  | 28                                           | 651        | 224   | 98   | 1000   | 8828                | 320    |
| 255 – 300                      | 214                                            | 13                                           | 387        | 573   | 27   | 1000  | 13                                           | 743        | 185   | 59   | 1000   | 21088               | 797    |
| 300 – 340                      | 259                                            | 1                                            | 438        | 532   | 30   | 1000  | 28                                           | 708        | 204   | 60   | 1000   | 17861               | 716    |
| 340 – 380                      | 291                                            | 37                                           | 465        | 458   | 41   | 1000  | 26                                           | 731        | 191   | 52   | 1000   | 22651               | 891    |
| 380 – 420                      | 248                                            | 5                                            | 510        | 457   | 28   | 1000  | 48                                           | 712        | 177   | 63   | 1000   | 22017               | 930    |
| 420 – 470                      | 262                                            | 5                                            | 536        | 399   | 59   | 1000  | 49                                           | 710        | 188   | 52   | 1000   | 24398               | 1065   |
| 470 – 525                      | 281                                            | 14                                           | 527        | 439   | 20   | 1000  | 49                                           | 715        | 186   | 49   | 1000   | 27514               | 1214   |
| 525 – 615                      | 279                                            | 2                                            | 514        | 457   | 26   | 1000  | 46                                           | 750        | 162   | 42   | 1000   | 28621               | 1308   |
| 615 – 775                      | 318                                            | 7                                            | 570        | 398   | 25   | 1000  | 38                                           | 766        | 152   | 44   | 1000   | 29982               | 1407   |
| 775 – 950                      | 359                                            | 28                                           | 577        | 378   | 17   | 1000  | 63                                           | 783        | 134   | 20   | 1000   | 16256               | 776    |
| 950 +                          | 460                                            | 28                                           | 574        | 390   | 8    | 1000  | 66                                           | 756        | 148   | 30   | 1000   | 18978               | 898    |
| all classes                    | 286                                            | 14                                           | 511        | 448   | 26   | 1000  | 41                                           | 731        | 177   | 51   | 1000   | 249416              | 10737  |
| estd. no. of aged persons (00) | 249416                                         | 1035                                         | 36519      | 32011 | 1836 | 71401 | 7235                                         | 130155     | 31515 | 9110 | 178015 | X                   | X      |
| sample aged persons            | 10737                                          | 33                                           | 1528       | 1469  | 84   | 3114  | 316                                          | 5403       | 1449  | 455  | 7623   | X                   | X      |

1  
2  
3  
4  
5  
6  
7  
8  
9  
10  
11  
12  
13  
14  
15  
16  
17  
18  
19  
20  
21  
22  
23  
24  
25  
26  
27  
28  
29  
30  
31  
32  
33  
34  
35  
36  
37  
38  
39  
40  
41  
42  
43  
44  
45  
46  
47

Table (17.1): Per 1000 distribution of aged persons with illness or otherwise by their perception about current state of health for each quintile class and sex

| all-India                      |                                                | Rural                                        |            |       |      |        |                                              |            |       |       |        | Persons             |        |
|--------------------------------|------------------------------------------------|----------------------------------------------|------------|-------|------|--------|----------------------------------------------|------------|-------|-------|--------|---------------------|--------|
| mpce class                     | no. per 1000 of aged persons reporting illness | aged person with illness                     |            |       |      |        | aged person without illness                  |            |       |       |        | no. of aged persons |        |
|                                |                                                | own perception about current state of health |            |       |      |        | own perception about current state of health |            |       |       |        | estd. (00)          | sample |
|                                |                                                | excellent/very good                          | good/ fair | poor  | n.r. | total  | excellent/very good                          | good/ fair | poor  | n.r.  | total  |                     |        |
| (1)                            | (2)                                            | (3)                                          | (4)        | (5)   | (6)  | (7)    | (8)                                          | (9)        | (10)  | (11)  | (12)   | (13)                | (14)   |
| 0 – 225                        | 240                                            | 16                                           | 412        | 545   | 27   | 1000   | 38                                           | 709        | 178   | 75    | 1000   | 20759               | 814    |
| 225 – 255                      | 189                                            | 0                                            | 401        | 559   | 40   | 1000   | 31                                           | 676        | 215   | 78    | 1000   | 17239               | 622    |
| 255 – 300                      | 215                                            | 8                                            | 434        | 525   | 32   | 1000   | 40                                           | 734        | 166   | 60    | 1000   | 41955               | 1602   |
| 300 – 340                      | 236                                            | 0                                            | 473        | 509   | 17   | 1000   | 57                                           | 681        | 200   | 62    | 1000   | 35156               | 1460   |
| 340 – 380                      | 274                                            | 22                                           | 530        | 426   | 22   | 1000   | 40                                           | 717        | 184   | 60    | 1000   | 44682               | 1855   |
| 380 – 420                      | 261                                            | 5                                            | 523        | 453   | 19   | 1000   | 61                                           | 720        | 165   | 55    | 1000   | 46067               | 1976   |
| 420 – 470                      | 281                                            | 36                                           | 515        | 404   | 45   | 1000   | 62                                           | 733        | 162   | 43    | 1000   | 50586               | 2249   |
| 470 – 525                      | 283                                            | 12                                           | 551        | 411   | 26   | 1000   | 50                                           | 720        | 170   | 61    | 1000   | 54956               | 2495   |
| 525 – 615                      | 281                                            | 5                                            | 543        | 431   | 21   | 1000   | 75                                           | 749        | 131   | 45    | 1000   | 60329               | 2800   |
| 615 – 775                      | 331                                            | 12                                           | 603        | 367   | 18   | 1000   | 59                                           | 760        | 133   | 49    | 1000   | 62693               | 2983   |
| 775 – 950                      | 358                                            | 33                                           | 607        | 345   | 15   | 1000   | 98                                           | 775        | 112   | 15    | 1000   | 30893               | 1586   |
| 950 +                          | 458                                            | 34                                           | 607        | 355   | 4    | 1000   | 94                                           | 765        | 109   | 32    | 1000   | 37355               | 1823   |
| all classes                    | 289                                            | 17                                           | 541        | 420   | 22   | 1000   | 59                                           | 731        | 158   | 52    | 1000   | 502670              | 22265  |
| estd. no. of aged persons (00) | 502670                                         | 2450                                         | 78690      | 61103 | 3227 | 145469 | 21008                                        | 261088     | 56504 | 18600 | 357200 | X                   | X      |
| sample aged persons            | 22265                                          | 94                                           | 3313       | 2954  | 154  | 6515   | 946                                          | 11185      | 2672  | 947   | 15750  | X                   | X      |

Table (17.1): Per 1000 distribution of aged persons with illness or otherwise by their perception about current state of health for each quintile class and sex

| all-India                      |                                                | Urban                                        |            |      |      |       |                                              |            |      |      |       | Males               |        |
|--------------------------------|------------------------------------------------|----------------------------------------------|------------|------|------|-------|----------------------------------------------|------------|------|------|-------|---------------------|--------|
| mpce class                     | no. per 1000 of aged persons reporting illness | aged person with illness                     |            |      |      |       | aged person without illness                  |            |      |      |       | no. of aged persons |        |
|                                |                                                | own perception about current state of health |            |      |      |       | own perception about current state of health |            |      |      |       | estd. (00)          | sample |
|                                |                                                | excellent/very good                          | good/ fair | poor | n.r. | total | excellent/very good                          | good/ fair | poor | n.r. | total |                     |        |
| (1)                            | (2)                                            | (3)                                          | (4)        | (5)  | (6)  | (7)   | (8)                                          | (9)        | (10) | (11) | (12)  | (13)                | (14)   |
| 0 – 225                        | 290                                            | 12                                           | 362        | 625  | 0    | 1000  | 81                                           | 574        | 273  | 72   | 1000  | 1695                | 118    |
| 225 – 255                      | 327                                            | 113                                          | 670        | 217  | 0    | 1000  | 99                                           | 669        | 202  | 30   | 1000  | 1314                | 83     |
| 255 – 300                      | 291                                            | 0                                            | 507        | 478  | 15   | 1000  | 31                                           | 770        | 161  | 38   | 1000  | 3731                | 271    |
| 300 – 340                      | 308                                            | 1                                            | 441        | 533  | 24   | 1000  | 75                                           | 716        | 186  | 24   | 1000  | 7743                | 576    |
| 340 – 380                      | 348                                            | 3                                            | 582        | 415  | 0    | 1000  | 106                                          | 727        | 96   | 71   | 1000  | 3552                | 296    |
| 380 – 420                      | 287                                            | 19                                           | 550        | 413  | 18   | 1000  | 70                                           | 788        | 100  | 42   | 1000  | 5877                | 493    |
| 420 – 470                      | 317                                            | 20                                           | 557        | 397  | 25   | 1000  | 105                                          | 776        | 84   | 36   | 1000  | 8343                | 707    |
| 470 – 525                      | 299                                            | 17                                           | 677        | 294  | 11   | 1000  | 84                                           | 785        | 96   | 34   | 1000  | 8126                | 727    |
| 525 – 615                      | 340                                            | 25                                           | 650        | 323  | 1    | 1000  | 147                                          | 735        | 84   | 33   | 1000  | 10204               | 894    |
| 615 – 775                      | 455                                            | 54                                           | 719        | 216  | 11   | 1000  | 120                                          | 744        | 97   | 39   | 1000  | 13511               | 1031   |
| 775 – 950                      | 337                                            | 58                                           | 687        | 253  | 2    | 1000  | 117                                          | 771        | 85   | 28   | 1000  | 4443                | 350    |
| 950 +                          | 474                                            | 37                                           | 712        | 244  | 7    | 1000  | 192                                          | 733        | 51   | 25   | 1000  | 10211               | 676    |
| all classes                    | 360                                            | 31                                           | 635        | 324  | 11   | 1000  | 110                                          | 747        | 107  | 36   | 1000  | 78751               | 6222   |
| estd. no. of aged persons (00) | 78751                                          | 873                                          | 17988      | 9173 | 307  | 28341 | 5534                                         | 37672      | 5396 | 1808 | 50410 | X                   | X      |
| sample aged persons            | 6222                                           | 50                                           | 1264       | 749  | 34   | 2097  | 448                                          | 3014       | 429  | 234  | 4125  | X                   | X      |

1  
2  
3  
4  
5  
6  
7  
8  
9  
10  
11  
12  
13  
14  
15  
16  
17  
18  
19  
20  
21  
22  
23  
24  
25  
26  
27  
28  
29  
30  
31  
32  
33  
34  
35  
36  
37  
38  
39  
40  
41  
42  
43  
44  
45  
46  
47

Table (17.1): Per 1000 distribution of aged persons with illness or otherwise by their perception about current state of health for each quintile class and sex

| all-India                      |                                                | Urban                                        |            |       |      |       |                                              |            |      |      |       | Females             |        |
|--------------------------------|------------------------------------------------|----------------------------------------------|------------|-------|------|-------|----------------------------------------------|------------|------|------|-------|---------------------|--------|
| mpce class                     | no. per 1000 of aged persons reporting illness | aged person with illness                     |            |       |      |       | aged person without illness                  |            |      |      |       | no. of aged persons |        |
|                                |                                                | own perception about current state of health |            |       |      |       | own perception about current state of health |            |      |      |       | estd. (00)          | sample |
|                                |                                                | excellent/very good                          | good/ fair | poor  | n.r. | total | excellent/very good                          | good/ fair | poor | n.r. | total |                     |        |
| (1)                            | (2)                                            | (3)                                          | (4)        | (5)   | (6)  | (7)   | (8)                                          | (9)        | (10) | (11) | (12)  | (13)                | (14)   |
| 0 – 225                        | 206                                            | 0                                            | 487        | 513   | 0    | 1000  | 87                                           | 529        | 276  | 108  | 1000  | 2745                | 170    |
| 225 – 255                      | 372                                            | 0                                            | 436        | 564   | 0    | 1000  | 137                                          | 445        | 354  | 64   | 1000  | 1461                | 111    |
| 255 – 300                      | 254                                            | 0                                            | 531        | 444   | 24   | 1000  | 48                                           | 619        | 292  | 41   | 1000  | 4458                | 315    |
| 300 – 340                      | 329                                            | 21                                           | 477        | 477   | 26   | 1000  | 47                                           | 797        | 137  | 19   | 1000  | 8766                | 643    |
| 340 – 380                      | 375                                            | 2                                            | 566        | 425   | 6    | 1000  | 105                                          | 657        | 153  | 85   | 1000  | 4032                | 304    |
| 380 – 420                      | 361                                            | 9                                            | 464        | 500   | 27   | 1000  | 43                                           | 808        | 103  | 47   | 1000  | 7321                | 565    |
| 420 – 470                      | 383                                            | 17                                           | 627        | 334   | 23   | 1000  | 42                                           | 799        | 122  | 37   | 1000  | 8550                | 710    |
| 470 – 525                      | 350                                            | 27                                           | 679        | 290   | 4    | 1000  | 38                                           | 827        | 113  | 21   | 1000  | 8554                | 733    |
| 525 – 615                      | 440                                            | 15                                           | 642        | 337   | 6    | 1000  | 78                                           | 782        | 117  | 24   | 1000  | 10703               | 892    |
| 615 – 775                      | 419                                            | 13                                           | 723        | 251   | 12   | 1000  | 79                                           | 789        | 108  | 24   | 1000  | 12163               | 972    |
| 775 – 950                      | 461                                            | 0                                            | 554        | 440   | 5    | 1000  | 78                                           | 765        | 116  | 42   | 1000  | 4024                | 310    |
| 950 +                          | 517                                            | 49                                           | 655        | 272   | 25   | 1000  | 131                                          | 714        | 133  | 22   | 1000  | 9582                | 619    |
| all classes                    | 390                                            | 19                                           | 611        | 355   | 15   | 1000  | 69                                           | 753        | 143  | 36   | 1000  | 82359               | 6344   |
| estd. no. of aged persons (00) | 82359                                          | 601                                          | 19637      | 11426 | 495  | 32159 | 3456                                         | 37785      | 7169 | 1790 | 50200 | X                   | X      |
| sample aged persons            | 6344                                           | 38                                           | 1399       | 848   | 43   | 2328  | 252                                          | 2962       | 564  | 238  | 4016  | X                   | X      |

Table (17.1): Per 1000 distribution of aged persons with illness or otherwise by their perception about current state of health for each quintile class and sex

| all-India                      |                                                | Urban                                        |            |       |      |       |                                              |            |       |      |        | Persons             |        |
|--------------------------------|------------------------------------------------|----------------------------------------------|------------|-------|------|-------|----------------------------------------------|------------|-------|------|--------|---------------------|--------|
| mpce class                     | no. per 1000 of aged persons reporting illness | aged person with illness                     |            |       |      |       | aged person without illness                  |            |       |      |        | no. of aged persons |        |
|                                |                                                | own perception about current state of health |            |       |      |       | own perception about current state of health |            |       |      |        | estd. (00)          | sample |
|                                |                                                | excellent/very good                          | good/ fair | poor  | n.r. | total | excellent/very good                          | good/ fair | poor  | n.r. | total  |                     |        |
| (1)                            | (2)                                            | (3)                                          | (4)        | (5)   | (6)  | (7)   | (8)                                          | (9)        | (10)  | (11) | (12)   | (13)                | (14)   |
| 0 – 225                        | 238                                            | 6                                            | 429        | 565   | 0    | 1000  | 85                                           | 545        | 275   | 95   | 1000   | 4441                | 288    |
| 225 – 255                      | 351                                            | 50                                           | 539        | 411   | 0    | 1000  | 119                                          | 555        | 279   | 47   | 1000   | 2775                | 194    |
| 255 – 300                      | 271                                            | 0                                            | 520        | 461   | 20   | 1000  | 40                                           | 686        | 234   | 40   | 1000   | 8189                | 586    |
| 300 – 340                      | 319                                            | 12                                           | 461        | 502   | 25   | 1000  | 60                                           | 758        | 160   | 21   | 1000   | 16508               | 1219   |
| 340 – 380                      | 363                                            | 3                                            | 573        | 421   | 4    | 1000  | 105                                          | 690        | 126   | 79   | 1000   | 7583                | 600    |
| 380 – 420                      | 328                                            | 13                                           | 498        | 466   | 23   | 1000  | 56                                           | 798        | 101   | 45   | 1000   | 13198               | 1058   |
| 420 – 470                      | 350                                            | 18                                           | 596        | 362   | 24   | 1000  | 75                                           | 787        | 102   | 36   | 1000   | 16894               | 1417   |
| 470 – 525                      | 325                                            | 23                                           | 678        | 292   | 7    | 1000  | 61                                           | 806        | 105   | 28   | 1000   | 16680               | 1460   |
| 525 – 615                      | 391                                            | 19                                           | 646        | 331   | 4    | 1000  | 115                                          | 757        | 99    | 29   | 1000   | 20907               | 1786   |
| 615 – 775                      | 438                                            | 36                                           | 721        | 232   | 11   | 1000  | 100                                          | 766        | 102   | 31   | 1000   | 25674               | 2003   |
| 775 – 950                      | 396                                            | 26                                           | 613        | 357   | 4    | 1000  | 100                                          | 768        | 98    | 34   | 1000   | 8468                | 660    |
| 950 +                          | 495                                            | 43                                           | 683        | 258   | 16   | 1000  | 163                                          | 724        | 89    | 24   | 1000   | 19793               | 1295   |
| all classes                    | 376                                            | 24                                           | 622        | 340   | 13   | 1000  | 89                                           | 750        | 125   | 36   | 1000   | 161110              | 12566  |
| estd. no. of aged persons (00) | 161110                                         | 1474                                         | 37625      | 20599 | 802  | 60500 | 8990                                         | 75457      | 12565 | 3598 | 100610 | X                   | X      |
| sample aged persons            | 12566                                          | 88                                           | 2663       | 1597  | 77   | 4425  | 700                                          | 5976       | 993   | 472  | 8141   | X                   | X      |



1  
2  
3  
4  
5  
6  
7  
8  
9  
10  
11  
12  
13  
14  
15  
16  
17  
18  
19  
20  
21  
22  
23  
24  
25  
26  
27  
28  
29  
30  
31  
32  
33  
34  
35  
36  
37  
38  
39  
40  
41  
42  
43  
44  
45  
46  
47

Table (17.1): Per 1000 distribution of aged persons with illness or otherwise by their perception about current state of health for each quintile class and sex

| all-India                      |                                                | Rural + Urban                                |            |       |      |        |                                              |            |       |       |        | Males               |        |
|--------------------------------|------------------------------------------------|----------------------------------------------|------------|-------|------|--------|----------------------------------------------|------------|-------|-------|--------|---------------------|--------|
| mpce class                     | no. per 1000 of aged persons reporting illness | aged person with illness                     |            |       |      |        | aged person without illness                  |            |       |       |        | no. of aged persons |        |
|                                |                                                | own perception about current state of health |            |       |      |        | own perception about current state of health |            |       |       |        | estd. (00)          | sample |
|                                |                                                | excellent/very good                          | good/ fair | poor  | n.r. | total  | excellent/very good                          | good/ fair | poor  | n.r.  | total  |                     |        |
| (1)                            | (2)                                            | (3)                                          | (4)        | (5)   | (6)  | (7)    | (8)                                          | (9)        | (10)  | (11)  | (12)   | (13)                | (14)   |
| 0 – 225                        | 281                                            | 5                                            | 442        | 513   | 40   | 1000   | 47                                           | 690        | 178   | 85    | 1000   | 11232               | 517    |
| 225 – 255                      | 209                                            | 24                                           | 482        | 429   | 64   | 1000   | 42                                           | 699        | 205   | 54    | 1000   | 9725                | 385    |
| 255 – 300                      | 227                                            | 3                                            | 486        | 478   | 33   | 1000   | 62                                           | 731        | 149   | 59    | 1000   | 24598               | 1076   |
| 300 – 340                      | 242                                            | 1                                            | 488        | 501   | 10   | 1000   | 82                                           | 672        | 193   | 52    | 1000   | 25038               | 1320   |
| 340 – 380                      | 270                                            | 4                                            | 602        | 394   | 0    | 1000   | 59                                           | 706        | 166   | 68    | 1000   | 25583               | 1260   |
| 380 – 420                      | 276                                            | 7                                            | 537        | 442   | 13   | 1000   | 73                                           | 739        | 142   | 46    | 1000   | 29927               | 1539   |
| 420 – 470                      | 303                                            | 51                                           | 512        | 405   | 32   | 1000   | 81                                           | 761        | 124   | 34    | 1000   | 34531               | 1891   |
| 470 – 525                      | 287                                            | 12                                           | 599        | 363   | 26   | 1000   | 58                                           | 738        | 140   | 63    | 1000   | 35568               | 2008   |
| 525 – 615                      | 297                                            | 12                                           | 591        | 384   | 12   | 1000   | 112                                          | 745        | 99    | 44    | 1000   | 41912               | 2386   |
| 615 – 775                      | 375                                            | 30                                           | 662        | 296   | 12   | 1000   | 89                                           | 751        | 110   | 50    | 1000   | 46223               | 2607   |
| 775 – 950                      | 352                                            | 42                                           | 651        | 296   | 11   | 1000   | 131                                          | 767        | 87    | 14    | 1000   | 19080               | 1160   |
| 950 +                          | 462                                            | 39                                           | 667        | 291   | 3    | 1000   | 146                                          | 760        | 63    | 31    | 1000   | 28588               | 1601   |
| all classes                    | 308                                            | 22                                           | 587        | 374   | 17   | 1000   | 84                                           | 734        | 132   | 49    | 1000   | 332005              | 17750  |
| estd. no. of aged persons (00) | 332005                                         | 2288                                         | 60159      | 38265 | 1698 | 102409 | 19307                                        | 168605     | 30385 | 11298 | 229596 | X                   | X      |
| sample aged persons            | 17750                                          | 111                                          | 3049       | 2234  | 104  | 5498   | 1078                                         | 8796       | 1652  | 726   | 12252  | X                   | X      |

Table (17.1): Per 1000 distribution of aged persons with illness or otherwise by their perception about current state of health for each quintile class and sex

| all-India                      |                                                | Rural + Urban                                |               |       |      |        |                                              |               |       |       |        | Females             |        |
|--------------------------------|------------------------------------------------|----------------------------------------------|---------------|-------|------|--------|----------------------------------------------|---------------|-------|-------|--------|---------------------|--------|
| mpce class                     | no. per 1000 of aged persons reporting illness | aged person with illness                     |               |       |      |        | aged person without illness                  |               |       |       |        | no. of aged persons |        |
|                                |                                                | own perception about current state of health |               |       |      |        | own perception about current state of health |               |       |       |        | estd. (00)          | sample |
|                                |                                                | excellent/<br>very good                      | good/<br>fair | poor  | n.r. | total  | excellent/<br>very good                      | good/<br>fair | poor  | n.r.  | total  |                     |        |
| (1)                            | (2)                                            | (3)                                          | (4)           | (5)   | (6)  | (7)    | (8)                                          | (9)           | (10)  | (11)  | (12)   | (13)                | (14)   |
| 0 – 225                        | 206                                            | 25                                           | 385           | 588   | 2    | 1000   | 46                                           | 673           | 208   | 73    | 1000   | 13968               | 585    |
| 225 – 255                      | 214                                            | 0                                            | 387           | 613   | 0    | 1000   | 40                                           | 627           | 239   | 94    | 1000   | 10289               | 431    |
| 255 – 300                      | 221                                            | 11                                           | 416           | 547   | 26   | 1000   | 19                                           | 722           | 203   | 56    | 1000   | 25546               | 1112   |
| 300 – 340                      | 282                                            | 8                                            | 453           | 511   | 28   | 1000   | 34                                           | 735           | 184   | 48    | 1000   | 26626               | 1359   |
| 340 – 380                      | 304                                            | 30                                           | 484           | 451   | 34   | 1000   | 37                                           | 721           | 186   | 56    | 1000   | 26683               | 1195   |
| 380 – 420                      | 276                                            | 6                                            | 495           | 471   | 28   | 1000   | 47                                           | 733           | 161   | 60    | 1000   | 29338               | 1495   |
| 420 – 470                      | 293                                            | 9                                            | 567           | 377   | 47   | 1000   | 48                                           | 730           | 173   | 49    | 1000   | 32949               | 1775   |
| 470 – 525                      | 298                                            | 18                                           | 570           | 397   | 16   | 1000   | 47                                           | 740           | 170   | 43    | 1000   | 36068               | 1947   |
| 525 – 615                      | 323                                            | 7                                            | 562           | 413   | 19   | 1000   | 53                                           | 757           | 152   | 38    | 1000   | 39323               | 2200   |
| 615 – 775                      | 347                                            | 9                                            | 624           | 347   | 20   | 1000   | 49                                           | 772           | 141   | 38    | 1000   | 42144               | 2379   |
| 775 – 950                      | 379                                            | 21                                           | 571           | 393   | 14   | 1000   | 66                                           | 780           | 131   | 23    | 1000   | 20281               | 1086   |
| 950 +                          | 480                                            | 35                                           | 603           | 347   | 14   | 1000   | 86                                           | 743           | 143   | 27    | 1000   | 28560               | 1517   |
| all classes                    | 312                                            | 16                                           | 542           | 419   | 23   | 1000   | 47                                           | 736           | 170   | 48    | 1000   | 331775              | 17081  |
| estd. no. of aged persons (00) | 331775                                         | 1636                                         | 56156         | 43437 | 2331 | 103560 | 10691                                        | 167940        | 38684 | 10899 | 228214 | X                   | X      |
| sample aged persons            | 17081                                          | 71                                           | 2927          | 2317  | 127  | 5442   | 568                                          | 8365          | 2013  | 693   | 11639  | X                   | X      |

1  
2  
3  
4  
5  
6  
7  
8  
9  
10  
11  
12  
13  
14  
15  
16  
17  
18  
19  
20  
21  
22  
23  
24  
25  
26  
27  
28  
29  
30  
31  
32  
33  
34  
35  
36  
37  
38  
39  
40  
41  
42  
43  
44  
45  
46  
47

Table (17.1): Per 1000 distribution of aged persons with illness or otherwise by their perception about current state of health for each quintile class and sex

| all-India                      |                                                | Rural + Urban                                |            |       |      |        |                                              |            |       |       |        | Persons             |        |
|--------------------------------|------------------------------------------------|----------------------------------------------|------------|-------|------|--------|----------------------------------------------|------------|-------|-------|--------|---------------------|--------|
| mpce class                     | no. per 1000 of aged persons reporting illness | aged person with illness                     |            |       |      |        | aged person without illness                  |            |       |       |        | no. of aged persons |        |
|                                |                                                | own perception about current state of health |            |       |      |        | own perception about current state of health |            |       |       |        |                     |        |
|                                |                                                | excellent/very good                          | good/ fair | poor  | n.r. | total  | excellent/very good                          | good/ fair | poor  | n.r.  | total  | estd. (00)          | sample |
| (1)                            | (2)                                            | (3)                                          | (4)        | (5)   | (6)  | (7)    | (8)                                          | (9)        | (10)  | (11)  | (12)   | (13)                | (14)   |
| 0 – 225                        | 240                                            | 14                                           | 415        | 549   | 22   | 1000   | 46                                           | 680        | 195   | 78    | 1000   | 25200               | 1102   |
| 225 – 255                      | 212                                            | 11                                           | 433        | 525   | 31   | 1000   | 41                                           | 662        | 222   | 75    | 1000   | 20014               | 816    |
| 255 – 300                      | 224                                            | 7                                            | 451        | 513   | 30   | 1000   | 40                                           | 726        | 176   | 57    | 1000   | 50144               | 2188   |
| 300 – 340                      | 263                                            | 5                                            | 468        | 506   | 20   | 1000   | 58                                           | 704        | 188   | 50    | 1000   | 51664               | 2679   |
| 340 – 380                      | 287                                            | 18                                           | 538        | 425   | 19   | 1000   | 48                                           | 714        | 176   | 62    | 1000   | 52266               | 2455   |
| 380 – 420                      | 276                                            | 7                                            | 516        | 456   | 20   | 1000   | 60                                           | 736        | 152   | 53    | 1000   | 59265               | 3034   |
| 420 – 470                      | 298                                            | 31                                           | 539        | 391   | 39   | 1000   | 65                                           | 746        | 148   | 41    | 1000   | 67479               | 3666   |
| 470 – 525                      | 292                                            | 15                                           | 584        | 380   | 21   | 1000   | 52                                           | 739        | 155   | 53    | 1000   | 71636               | 3955   |
| 525 – 615                      | 309                                            | 10                                           | 576        | 399   | 16   | 1000   | 84                                           | 751        | 124   | 41    | 1000   | 81235               | 4586   |
| 615 – 775                      | 362                                            | 20                                           | 645        | 319   | 16   | 1000   | 69                                           | 761        | 125   | 44    | 1000   | 88367               | 4986   |
| 775 – 950                      | 366                                            | 31                                           | 609        | 348   | 13   | 1000   | 98                                           | 774        | 109   | 19    | 1000   | 39361               | 2246   |
| 950 +                          | 471                                            | 37                                           | 635        | 320   | 9    | 1000   | 117                                          | 751        | 103   | 29    | 1000   | 57148               | 3118   |
| all classes                    | 310                                            | 19                                           | 565        | 397   | 20   | 1000   | 66                                           | 735        | 151   | 48    | 1000   | 663779              | 34831  |
| estd. no. of aged persons (00) | 663779                                         | 3924                                         | 116315     | 81702 | 4029 | 205970 | 29998                                        | 336545     | 69069 | 22198 | 457810 | X                   | X      |
| sample aged persons            | 34831                                          | 182                                          | 5976       | 4551  | 231  | 10940  | 1646                                         | 17161      | 3665  | 1419  | 23891  | X                   | X      |

Table (17.2): Per 1000 distribution of aged persons with illness or otherwise by their perception about current state of health for each sex

| Rural             |                                                |                                              |               |      |      |       |                                              |               |      |      |       |                     | Males  |  |
|-------------------|------------------------------------------------|----------------------------------------------|---------------|------|------|-------|----------------------------------------------|---------------|------|------|-------|---------------------|--------|--|
| state/ut          | no. per 1000 of aged persons reporting illness | aged person with illness                     |               |      |      |       | aged person without illness                  |               |      |      |       | no. of aged persons |        |  |
|                   |                                                | own perception about current state of health |               |      |      |       | own perception about current state of health |               |      |      |       |                     |        |  |
|                   |                                                | excellent/<br>very good                      | good/<br>fair | poor | n.r. | total | excellent/<br>very good                      | good/<br>fair | poor | n.r. | total | estd.<br>(00)       | sample |  |
| (1)               | (2)                                            | (3)                                          | (4)           | (5)  | (6)  | (7)   | (8)                                          | (9)           | (10) | (11) | (12)  | (13)                | (14)   |  |
| Andhra Pradesh    | 351                                            | 23                                           | 573           | 384  | 20   | 1000  | 39                                           | 787           | 152  | 22   | 1000  | 18730               | 697    |  |
| Arunachal Pradesh | 259                                            | 156                                          | 379           | 292  | 173  | 1000  | 54                                           | 375           | 56   | 515  | 1000  | 238                 | 140    |  |
| Assam             | 373                                            | 10                                           | 616           | 313  | 62   | 1000  | 22                                           | 716           | 141  | 120  | 1000  | 6103                | 471    |  |
| Bihar             | 187                                            | 5                                            | 559           | 424  | 13   | 1000  | 87                                           | 667           | 157  | 89   | 1000  | 18861               | 912    |  |
| Chhattisgarh      | 165                                            | 0                                            | 527           | 473  | 0    | 1000  | 68                                           | 773           | 100  | 58   | 1000  | 4609                | 204    |  |
| Delhi             | -                                              | -                                            | -             | -    | -    | -     | 93                                           | 742           | 166  | 0    | 1000  | 338                 | 16     |  |
| Goa               | 650                                            | 0                                            | 822           | 178  | 0    | 1000  | 468                                          | 402           | 129  | 0    | 1000  | 506                 | 19     |  |
| Gujarat           | 372                                            | 40                                           | 761           | 199  | 0    | 1000  | 95                                           | 807           | 90   | 9    | 1000  | 10458               | 351    |  |
| Haryana           | 251                                            | 7                                            | 622           | 371  | 0    | 1000  | 87                                           | 802           | 109  | 2    | 1000  | 5608                | 252    |  |
| Himachal Pradesh  | 298                                            | 25                                           | 559           | 416  | 0    | 1000  | 104                                          | 790           | 79   | 27   | 1000  | 2400                | 347    |  |
| Jammu & Kashmir   | 340                                            | 1                                            | 504           | 496  | 0    | 1000  | 94                                           | 803           | 68   | 35   | 1000  | 2246                | 230    |  |
| Jharkhand         | 96                                             | 59                                           | 613           | 276  | 51   | 1000  | 42                                           | 661           | 240  | 57   | 1000  | 6400                | 330    |  |
| Karnataka         | 338                                            | 8                                            | 572           | 420  | 0    | 1000  | 136                                          | 780           | 74   | 10   | 1000  | 11642               | 428    |  |
| Kerala            | 582                                            | 5                                            | 443           | 532  | 20   | 1000  | 24                                           | 787           | 189  | 0    | 1000  | 11673               | 505    |  |
| Madhya Pradesh    | 232                                            | 9                                            | 521           | 471  | 0    | 1000  | 84                                           | 711           | 167  | 38   | 1000  | 14666               | 549    |  |
| Maharashtra       | 319                                            | 16                                           | 671           | 287  | 26   | 1000  | 106                                          | 749           | 134  | 11   | 1000  | 23347               | 717    |  |
| Manipur           | 74                                             | 52                                           | 104           | 655  | 189  | 1000  | 203                                          | 428           | 90   | 279  | 1000  | 395                 | 211    |  |
| Meghalaya         | 171                                            | 0                                            | 685           | 315  | 0    | 1000  | 192                                          | 733           | 24   | 51   | 1000  | 467                 | 96     |  |
| Mizoram           | 92                                             | 0                                            | 491           | 404  | 104  | 1000  | 117                                          | 283           | 46   | 554  | 1000  | 119                 | 89     |  |
| Nagaland          | 251                                            | 150                                          | 363           | 414  | 73   | 1000  | 187                                          | 620           | 107  | 86   | 1000  | 109                 | 56     |  |
| Orissa            | 167                                            | 0                                            | 495           | 473  | 32   | 1000  | 58                                           | 720           | 184  | 37   | 1000  | 13371               | 525    |  |
| Punjab            | 314                                            | 36                                           | 755           | 209  | 0    | 1000  | 99                                           | 799           | 82   | 20   | 1000  | 6843                | 258    |  |
| Rajasthan         | 169                                            | 14                                           | 555           | 431  | 0    | 1000  | 93                                           | 750           | 149  | 8    | 1000  | 12196               | 552    |  |
| Sikkim            | 197                                            | 0                                            | 429           | 571  | 0    | 1000  | 170                                          | 726           | 93   | 11   | 1000  | 115                 | 110    |  |
| Tamil Nadu        | 291                                            | 25                                           | 724           | 249  | 1    | 1000  | 70                                           | 827           | 101  | 2    | 1000  | 16961               | 571    |  |
| Tripura           | 277                                            | 19                                           | 786           | 150  | 45   | 1000  | 69                                           | 768           | 78   | 85   | 1000  | 927                 | 171    |  |

Continued

Table (17.2): Per 1000 distribution of aged persons with illness or otherwise by their perception about current state of health for each sex

| Rural                          |                                                |                                              |               |       |      |       |                                              |               |       |      |        | Males               |        |
|--------------------------------|------------------------------------------------|----------------------------------------------|---------------|-------|------|-------|----------------------------------------------|---------------|-------|------|--------|---------------------|--------|
| state/ut                       | no. per 1000 of aged persons reporting illness | aged person with illness                     |               |       |      |       | aged person without illness                  |               |       |      |        | no. of aged persons |        |
|                                |                                                | own perception about current state of health |               |       |      |       | own perception about current state of health |               |       |      |        |                     |        |
|                                |                                                | excellent/<br>very good                      | good/<br>fair | poor  | n.r. | total | excellent/<br>very good                      | good/<br>fair | poor  | n.r. | total  | estd.<br>(00)       | sample |
| (1)                            | (2)                                            | (3)                                          | (4)           | (5)   | (6)  | (7)   | (8)                                          | (9)           | (10)  | (11) | (12)   | (13)                | (14)   |
| Uttaranchal                    | 165                                            | 34                                           | 425           | 541   | 0    | 1000  | 45                                           | 789           | 96    | 71   | 1000   | 2674                | 102    |
| Uttar Pradesh                  | 292                                            | 31                                           | 533           | 401   | 34   | 1000  | 65                                           | 690           | 131   | 114  | 1000   | 42788               | 1825   |
| West Bengal                    | 371                                            | 20                                           | 394           | 560   | 26   | 1000  | 80                                           | 611           | 182   | 126  | 1000   | 18130               | 680    |
| A & N Islands                  | 312                                            | 0                                            | 983           | 17    | 0    | 1000  | 142                                          | 858           | 0     | 0    | 1000   | 76                  | 34     |
| Chandigarh                     | 508                                            | 0                                            | 195           | 805   | 0    | 1000  | 0                                            | 475           | 525   | 0    | 1000   | 7                   | 17     |
| Dadra & N. Haveli              | 13                                             | 0                                            | 0             | 1000  | 0    | 1000  | 129                                          | 825           | 46    | 0    | 1000   | 78                  | 20     |
| Daman & Diu                    | 0                                              | 0                                            | 0             | 0     | 0    | 0     | 0                                            | 1000          | 0     | 0    | 1000   | 4                   | 7      |
| Lakshadweep                    | 402                                            | 0                                            | 873           | 127   | 0    | 1000  | 0                                            | 951           | 49    | 0    | 1000   | 7                   | 16     |
| Pondicherry                    | 532                                            | 0                                            | 762           | 238   | 0    | 1000  | 0                                            | 1000          | 0     | 0    | 1000   | 160                 | 20     |
| OENS                           | 206                                            | 41                                           | 631           | 265   | 63   | 1000  | 132                                          | 621           | 67    | 179  | 1000   | 2371                | 873    |
| GUTs                           | 350                                            | 0                                            | 785           | 215   | 0    | 1000  | 80                                           | 894           | 26    | 0    | 1000   | 333                 | 114    |
| all-India                      | 292                                            | 19                                           | 569           | 393   | 19   | 1000  | 77                                           | 731           | 139   | 53   | 1000   | 253254              | 11528  |
| estd. no. of aged persons (00) | 253254                                         | 1415                                         | 42171         | 29092 | 1391 | 74068 | 13773                                        | 130933        | 24989 | 9491 | 179186 | X                   | X      |
| sample aged persons            | 11528                                          | 61                                           | 1785          | 1485  | 70   | 3401  | 630                                          | 5782          | 1223  | 492  | 8127   | X                   | X      |

Table (17.2): Per 1000 distribution of aged persons with illness or otherwise by their perception about current state of health for each sex

| Rural             |                                                |                                              |               |      |      |       |                                              |               |      |      |       |                     | Females |  |
|-------------------|------------------------------------------------|----------------------------------------------|---------------|------|------|-------|----------------------------------------------|---------------|------|------|-------|---------------------|---------|--|
| state/ut          | no. per 1000 of aged persons reporting illness | aged person with illness                     |               |      |      |       | aged person without illness                  |               |      |      |       | no. of aged persons |         |  |
|                   |                                                | own perception about current state of health |               |      |      |       | own perception about current state of health |               |      |      |       |                     |         |  |
|                   |                                                | excellent/<br>very good                      | good/<br>fair | poor | n.r. | total | excellent/<br>very good                      | good/<br>fair | poor | n.r. | total | estd.<br>(00)       | sample  |  |
| (1)               | (2)                                            | (3)                                          | (4)           | (5)  | (6)  | (7)   | (8)                                          | (9)           | (10) | (11) | (12)  | (13)                | (14)    |  |
| Andhra Pradesh    | 375                                            | 9                                            | 449           | 516  | 26   | 1000  | 33                                           | 799           | 146  | 22   | 1000  | 20035               | 688     |  |
| Arunachal Pradesh | 221                                            | 0                                            | 261           | 430  | 310  | 1000  | 71                                           | 465           | 55   | 410  | 1000  | 204                 | 118     |  |
| Assam             | 416                                            | 10                                           | 398           | 510  | 82   | 1000  | 1                                            | 759           | 105  | 135  | 1000  | 4273                | 323     |  |
| Bihar             | 159                                            | 1                                            | 448           | 479  | 72   | 1000  | 33                                           | 610           | 233  | 125  | 1000  | 15258               | 678     |  |
| Chhattisgarh      | 148                                            | 47                                           | 392           | 524  | 38   | 1000  | 36                                           | 798           | 126  | 40   | 1000  | 6680                | 290     |  |
| Delhi             | -                                              | -                                            | -             | -    | -    | -     | 0                                            | 947           | 53   | 0    | 1000  | 322                 | 17      |  |
| Goa               | 628                                            | 0                                            | 796           | 204  | 0    | 1000  | 183                                          | 614           | 203  | 0    | 1000  | 615                 | 32      |  |
| Gujarat           | 245                                            | 44                                           | 673           | 284  | 0    | 1000  | 37                                           | 879           | 83   | 1    | 1000  | 10401               | 370     |  |
| Haryana           | 216                                            | 0                                            | 613           | 387  | 0    | 1000  | 44                                           | 815           | 141  | 0    | 1000  | 5510                | 232     |  |
| Himachal Pradesh  | 266                                            | 8                                            | 530           | 450  | 13   | 1000  | 20                                           | 862           | 79   | 39   | 1000  | 2546                | 346     |  |
| Jammu & Kashmir   | 356                                            | 0                                            | 249           | 748  | 3    | 1000  | 32                                           | 782           | 178  | 8    | 1000  | 1555                | 173     |  |
| Jharkhand         | 70                                             | 0                                            | 681           | 297  | 22   | 1000  | 65                                           | 552           | 344  | 39   | 1000  | 4441                | 231     |  |
| Karnataka         | 264                                            | 0                                            | 498           | 502  | 0    | 1000  | 42                                           | 862           | 83   | 12   | 1000  | 10878               | 403     |  |
| Kerala            | 593                                            | 3                                            | 490           | 499  | 8    | 1000  | 16                                           | 684           | 244  | 55   | 1000  | 15013               | 649     |  |
| Madhya Pradesh    | 202                                            | 55                                           | 457           | 461  | 26   | 1000  | 57                                           | 728           | 175  | 41   | 1000  | 14701               | 544     |  |
| Maharashtra       | 305                                            | 2                                            | 633           | 331  | 34   | 1000  | 44                                           | 831           | 107  | 18   | 1000  | 24333               | 716     |  |
| Manipur           | 91                                             | 0                                            | 457           | 543  | 0    | 1000  | 92                                           | 592           | 123  | 194  | 1000  | 279                 | 163     |  |
| Meghalaya         | 187                                            | 0                                            | 449           | 475  | 76   | 1000  | 82                                           | 722           | 136  | 60   | 1000  | 431                 | 95      |  |
| Mizoram           | 107                                            | 0                                            | 379           | 283  | 338  | 1000  | 71                                           | 393           | 53   | 483  | 1000  | 76                  | 48      |  |
| Nagaland          | 147                                            | 0                                            | 379           | 621  | 0    | 1000  | 0                                            | 610           | 278  | 112  | 1000  | 39                  | 24      |  |
| Orissa            | 162                                            | 6                                            | 394           | 600  | 0    | 1000  | 21                                           | 628           | 320  | 30   | 1000  | 12157               | 483     |  |
| Punjab            | 422                                            | 10                                           | 589           | 396  | 5    | 1000  | 63                                           | 777           | 160  | 0    | 1000  | 6518                | 239     |  |
| Rajasthan         | 134                                            | 28                                           | 430           | 543  | 0    | 1000  | 58                                           | 750           | 192  | 0    | 1000  | 12999               | 583     |  |
| Sikkim            | 205                                            | 0                                            | 631           | 369  | 0    | 1000  | 43                                           | 770           | 87   | 100  | 1000  | 109                 | 94      |  |
| Tamil Nadu        | 301                                            | 52                                           | 720           | 227  | 0    | 1000  | 70                                           | 847           | 79   | 4    | 1000  | 17146               | 549     |  |
| Tripura           | 337                                            | 0                                            | 641           | 347  | 12   | 1000  | 8                                            | 812           | 150  | 30   | 1000  | 675                 | 135     |  |

Continued

Table (17.2): Per 1000 distribution of aged persons with illness or otherwise by their perception about current state of health for each sex

| Rural                          |                                                |                                              |               |       |      |       |                                              |               |       |      |        | Females             |        |
|--------------------------------|------------------------------------------------|----------------------------------------------|---------------|-------|------|-------|----------------------------------------------|---------------|-------|------|--------|---------------------|--------|
| state/ut                       | no. per 1000 of aged persons reporting illness | aged person with illness                     |               |       |      |       | aged person without illness                  |               |       |      |        | no. of aged persons |        |
|                                |                                                | own perception about current state of health |               |       |      |       | own perception about current state of health |               |       |      |        |                     |        |
|                                |                                                | excellent/<br>very good                      | good/<br>fair | poor  | n.r. | total | excellent/<br>very good                      | good/<br>fair | poor  | n.r. | total  | estd.<br>(00)       | sample |
| (1)                            | (2)                                            | (3)                                          | (4)           | (5)   | (6)  | (7)   | (8)                                          | (9)           | (10)  | (11) | (12)   | (13)                | (14)   |
| Uttaranchal                    | 135                                            | 0                                            | 812           | 188   | 0    | 1000  | 0                                            | 791           | 197   | 11   | 1000   | 2190                | 90     |
| Uttar Pradesh                  | 273                                            | 17                                           | 454           | 487   | 42   | 1000  | 43                                           | 657           | 193   | 107  | 1000   | 41298               | 1649   |
| West Bengal                    | 386                                            | 4                                            | 437           | 510   | 49   | 1000  | 17                                           | 567           | 292   | 124  | 1000   | 18472               | 686    |
| A & N Islands                  | 199                                            | 0                                            | 367           | 633   | 0    | 1000  | 256                                          | 550           | 0     | 195  | 1000   | 43                  | 15     |
| Chandigarh                     | 323                                            | 0                                            | 887           | 113   | 0    | 1000  | 0                                            | 507           | 493   | 0    | 1000   | 8                   | 11     |
| Dadra & N. Haveli              | 95                                             | 0                                            | 0             | 1000  | 0    | 1000  | 0                                            | 970           | 30    | 0    | 1000   | 39                  | 10     |
| Daman & Diu                    | 155                                            | 0                                            | 818           | 182   | 0    | 1000  | 0                                            | 984           | 16    | 0    | 1000   | 13                  | 13     |
| Lakshadweep                    | 617                                            | 0                                            | 954           | 46    | 0    | 1000  | 47                                           | 953           | 0     | 0    | 1000   | 9                   | 22     |
| Pondicherry                    | 724                                            | 0                                            | 799           | 201   | 0    | 1000  | 0                                            | 1000          | 0     | 0    | 1000   | 148                 | 18     |
| OENS                           | 229                                            | 0                                            | 542           | 397   | 62   | 1000  | 54                                           | 682           | 125   | 139  | 1000   | 1813                | 677    |
| GUTs                           | 498                                            | 0                                            | 756           | 244   | 0    | 1000  | 69                                           | 849           | 31    | 51   | 1000   | 261                 | 89     |
| all-India                      | 286                                            | 14                                           | 511           | 448   | 26   | 1000  | 41                                           | 731           | 177   | 51   | 1000   | 249416              | 10737  |
| estd. no. of aged persons (00) | 249416                                         | 1035                                         | 36519         | 32011 | 1836 | 71401 | 7235                                         | 130155        | 31515 | 9110 | 178015 | X                   | X      |
| sample aged persons            | 10737                                          | 33                                           | 1528          | 1469  | 84   | 3114  | 316                                          | 5403          | 1449  | 455  | 7623   | X                   | X      |



Table (17.2): Per 1000 distribution of aged persons with illness or otherwise by their perception about current state of health for each sex

| Rural             |                                                |                                              |               |      |      |       |                                              |               |      |      |       | Persons             |        |
|-------------------|------------------------------------------------|----------------------------------------------|---------------|------|------|-------|----------------------------------------------|---------------|------|------|-------|---------------------|--------|
| state/ut          | no. per 1000 of aged persons reporting illness | aged person with illness                     |               |      |      |       | aged person without illness                  |               |      |      |       | no. of aged persons |        |
|                   |                                                | own perception about current state of health |               |      |      |       | own perception about current state of health |               |      |      |       |                     |        |
|                   |                                                | excellent/<br>very good                      | good/<br>fair | poor | n.r. | total | excellent/<br>very good                      | good/<br>fair | poor | n.r. | total | estd.<br>(00)       | sample |
| (1)               | (2)                                            | (3)                                          | (4)           | (5)  | (6)  | (7)   | (8)                                          | (9)           | (10) | (11) | (12)  | (13)                | (14)   |
| Andhra Pradesh    | 364                                            | 15                                           | 507           | 454  | 23   | 1000  | 36                                           | 793           | 149  | 22   | 1000  | 38765               | 1385   |
| Arunachal Pradesh | 242                                            | 90                                           | 329           | 350  | 231  | 1000  | 62                                           | 418           | 56   | 465  | 1000  | 442                 | 258    |
| Assam             | 391                                            | 10                                           | 521           | 399  | 70   | 1000  | 14                                           | 733           | 127  | 126  | 1000  | 10376               | 794    |
| Bihar             | 174                                            | 3                                            | 514           | 446  | 37   | 1000  | 62                                           | 641           | 191  | 105  | 1000  | 34119               | 1590   |
| Chhattisgarh      | 155                                            | 26                                           | 451           | 502  | 21   | 1000  | 49                                           | 788           | 116  | 48   | 1000  | 11289               | 494    |
| Delhi             | -                                              | -                                            | -             | -    | -    | -     | 47                                           | 842           | 111  | 0    | 1000  | 661                 | 33     |
| Goa               | 638                                            | 0                                            | 808           | 192  | 0    | 1000  | 308                                          | 521           | 171  | 0    | 1000  | 1121                | 51     |
| Gujarat           | 309                                            | 41                                           | 726           | 233  | 0    | 1000  | 63                                           | 846           | 86   | 5    | 1000  | 20859               | 721    |
| Haryana           | 234                                            | 4                                            | 618           | 378  | 0    | 1000  | 65                                           | 809           | 125  | 1    | 1000  | 11118               | 484    |
| Himachal Pradesh  | 282                                            | 16                                           | 545           | 433  | 6    | 1000  | 60                                           | 828           | 79   | 33   | 1000  | 4946                | 693    |
| Jammu & Kashmir   | 346                                            | 0                                            | 397           | 602  | 1    | 1000  | 69                                           | 795           | 113  | 24   | 1000  | 3801                | 403    |
| Jharkhand         | 85                                             | 40                                           | 636           | 283  | 41   | 1000  | 52                                           | 616           | 283  | 49   | 1000  | 10841               | 561    |
| Karnataka         | 302                                            | 4                                            | 541           | 455  | 0    | 1000  | 88                                           | 822           | 79   | 11   | 1000  | 22520               | 831    |
| Kerala            | 588                                            | 4                                            | 470           | 513  | 13   | 1000  | 20                                           | 730           | 220  | 31   | 1000  | 26687               | 1154   |
| Madhya Pradesh    | 217                                            | 30                                           | 491           | 466  | 12   | 1000  | 70                                           | 719           | 171  | 39   | 1000  | 29367               | 1093   |
| Maharashtra       | 312                                            | 9                                            | 652           | 309  | 30   | 1000  | 74                                           | 791           | 120  | 15   | 1000  | 47679               | 1433   |
| Manipur           | 81                                             | 28                                           | 268           | 603  | 101  | 1000  | 158                                          | 495           | 103  | 244  | 1000  | 673                 | 374    |
| Meghalaya         | 179                                            | 0                                            | 566           | 395  | 38   | 1000  | 140                                          | 728           | 77   | 55   | 1000  | 898                 | 191    |
| Mizoram           | 98                                             | 0                                            | 443           | 353  | 204  | 1000  | 99                                           | 326           | 49   | 527  | 1000  | 196                 | 137    |
| Nagaland          | 223                                            | 124                                          | 366           | 450  | 60   | 1000  | 133                                          | 617           | 157  | 94   | 1000  | 148                 | 80     |
| Orissa            | 164                                            | 3                                            | 448           | 532  | 17   | 1000  | 40                                           | 676           | 249  | 34   | 1000  | 25527               | 1008   |
| Punjab            | 366                                            | 21                                           | 661           | 314  | 3    | 1000  | 83                                           | 789           | 117  | 11   | 1000  | 13361               | 497    |
| Rajasthan         | 151                                            | 20                                           | 498           | 482  | 0    | 1000  | 75                                           | 750           | 172  | 4    | 1000  | 25196               | 1135   |
| Sikkim            | 201                                            | 0                                            | 529           | 471  | 0    | 1000  | 109                                          | 747           | 90   | 54   | 1000  | 224                 | 204    |
| Tamil Nadu        | 296                                            | 39                                           | 722           | 238  | 1    | 1000  | 70                                           | 837           | 90   | 3    | 1000  | 34107               | 1120   |
| Tripura           | 302                                            | 10                                           | 718           | 243  | 29   | 1000  | 45                                           | 785           | 107  | 63   | 1000  | 1602                | 306    |

Continued

Table (17.2): Per 1000 distribution of aged persons with illness or otherwise by their perception about current state of health for each sex

| Rural                          |                                                |                                              |               |       |      |        |                                              |               |       |       |        | Persons             |        |
|--------------------------------|------------------------------------------------|----------------------------------------------|---------------|-------|------|--------|----------------------------------------------|---------------|-------|-------|--------|---------------------|--------|
| state/ut                       | no. per 1000 of aged persons reporting illness | aged person with illness                     |               |       |      |        | aged person without illness                  |               |       |       |        | no. of aged persons |        |
|                                |                                                | own perception about current state of health |               |       |      |        | own perception about current state of health |               |       |       |        |                     |        |
|                                |                                                | excellent/<br>very good                      | good/<br>fair | poor  | n.r. | total  | excellent/<br>very good                      | good/<br>fair | poor  | n.r.  | total  | estd.<br>(00)       | sample |
| (1)                            | (2)                                            | (3)                                          | (4)           | (5)   | (6)  | (7)    | (8)                                          | (9)           | (10)  | (11)  | (12)   | (13)                | (14)   |
| Uttaranchal                    | 152                                            | 20                                           | 580           | 400   | 0    | 1000   | 24                                           | 790           | 142   | 43    | 1000   | 4865                | 192    |
| Uttar Pradesh                  | 283                                            | 25                                           | 495           | 442   | 38   | 1000   | 54                                           | 674           | 162   | 110   | 1000   | 84086               | 3474   |
| West Bengal                    | 379                                            | 12                                           | 416           | 534   | 38   | 1000   | 49                                           | 589           | 237   | 125   | 1000   | 36602               | 1366   |
| A & N Islands                  | 271                                            | 0                                            | 819           | 181   | 0    | 1000   | 187                                          | 736           | 0     | 77    | 1000   | 120                 | 49     |
| Chandigarh                     | 409                                            | 0                                            | 487           | 513   | 0    | 1000   | 0                                            | 495           | 505   | 0     | 1000   | 16                  | 28     |
| Dadra & N. Haveli              | 40                                             | 0                                            | 0             | 1000  | 0    | 1000   | 89                                           | 871           | 41    | 0     | 1000   | 117                 | 30     |
| Daman & Diu                    | 119                                            | 0                                            | 818           | 182   | 0    | 1000   | 0                                            | 988           | 12    | 0     | 1000   | 17                  | 20     |
| Lakshadweep                    | 522                                            | 0                                            | 926           | 74    | 0    | 1000   | 21                                           | 952           | 27    | 0     | 1000   | 16                  | 38     |
| Pondicherry                    | 624                                            | 0                                            | 782           | 218   | 0    | 1000   | 0                                            | 1000          | 0     | 0     | 1000   | 309                 | 38     |
| OENS                           | 216                                            | 22                                           | 590           | 326   | 62   | 1000   | 99                                           | 647           | 92    | 162   | 1000   | 4184                | 1550   |
| GUTs                           | 415                                            | 0                                            | 770           | 230   | 0    | 1000   | 76                                           | 877           | 28    | 19    | 1000   | 594                 | 203    |
| all-India                      | 289                                            | 17                                           | 541           | 420   | 22   | 1000   | 59                                           | 731           | 158   | 52    | 1000   | 502670              | 22265  |
| estd. no. of aged persons (00) | 502670                                         | 2450                                         | 78690         | 61103 | 3227 | 145469 | 21008                                        | 261088        | 56504 | 18600 | 357200 | X                   | X      |
| sample aged persons            | 22265                                          | 94                                           | 3313          | 2954  | 154  | 6515   | 946                                          | 11185         | 2672  | 947   | 15750  | X                   | X      |

Table (17.2): Per 1000 distribution of aged persons with illness or otherwise by their perception about current state of health for each sex

| Urban             |                                                |                                              |               |      |      |       |                                              |               |      |      |       |                     | Males  |  |
|-------------------|------------------------------------------------|----------------------------------------------|---------------|------|------|-------|----------------------------------------------|---------------|------|------|-------|---------------------|--------|--|
| state/ut          | no. per 1000 of aged persons reporting illness | aged person with illness                     |               |      |      |       | aged person without illness                  |               |      |      |       | no. of aged persons |        |  |
|                   |                                                | own perception about current state of health |               |      |      |       | own perception about current state of health |               |      |      |       |                     |        |  |
|                   |                                                | excellent/<br>very good                      | good/<br>fair | poor | n.r. | total | excellent/<br>very good                      | good/<br>fair | poor | n.r. | total | estd.<br>(00)       | sample |  |
| (1)               | (2)                                            | (3)                                          | (4)           | (5)  | (6)  | (7)   | (8)                                          | (9)           | (10) | (11) | (12)  | (13)                | (14)   |  |
| Andhra Pradesh    | 524                                            | 10                                           | 665           | 312  | 13   | 1000  | 114                                          | 795           | 47   | 44   | 1000  | 5310                | 377    |  |
| Arunachal Pradesh | 60                                             | 0                                            | 158           | 526  | 316  | 1000  | 47                                           | 291           | 85   | 577  | 1000  | 10                  | 42     |  |
| Assam             | 401                                            | 33                                           | 525           | 359  | 83   | 1000  | 24                                           | 798           | 74   | 104  | 1000  | 647                 | 109    |  |
| Bihar             | 247                                            | 14                                           | 513           | 473  | 0    | 1000  | 106                                          | 658           | 138  | 99   | 1000  | 2455                | 169    |  |
| Chhattisgarh      | 292                                            | 260                                          | 249           | 491  | 0    | 1000  | 102                                          | 674           | 224  | 0    | 1000  | 641                 | 63     |  |
| Delhi             | 136                                            | 0                                            | 663           | 337  | 0    | 1000  | 113                                          | 768           | 103  | 16   | 1000  | 2212                | 211    |  |
| Goa               | 163                                            | 0                                            | 156           | 844  | 0    | 1000  | 284                                          | 691           | 25   | 0    | 1000  | 229                 | 32     |  |
| Gujarat           | 385                                            | 50                                           | 700           | 250  | 0    | 1000  | 160                                          | 791           | 49   | 0    | 1000  | 4592                | 297    |  |
| Haryana           | 325                                            | 50                                           | 608           | 341  | 0    | 1000  | 165                                          | 738           | 87   | 10   | 1000  | 1315                | 132    |  |
| Himachal Pradesh  | 317                                            | 0                                            | 640           | 360  | 0    | 1000  | 17                                           | 983           | 0    | 0    | 1000  | 139                 | 49     |  |
| Jammu & Kashmir   | 388                                            | 0                                            | 627           | 373  | 0    | 1000  | 143                                          | 672           | 173  | 11   | 1000  | 408                 | 102    |  |
| Jharkhand         | 204                                            | 0                                            | 606           | 394  | 0    | 1000  | 123                                          | 742           | 118  | 16   | 1000  | 1372                | 166    |  |
| Karnataka         | 292                                            | 20                                           | 652           | 319  | 9    | 1000  | 105                                          | 803           | 73   | 19   | 1000  | 4025                | 345    |  |
| Kerala            | 537                                            | 46                                           | 552           | 386  | 16   | 1000  | 153                                          | 749           | 78   | 20   | 1000  | 3986                | 290    |  |
| Madhya Pradesh    | 251                                            | 0                                            | 504           | 496  | 0    | 1000  | 165                                          | 642           | 147  | 47   | 1000  | 4115                | 319    |  |
| Maharashtra       | 409                                            | 30                                           | 683           | 280  | 6    | 1000  | 105                                          | 735           | 131  | 30   | 1000  | 12844               | 596    |  |
| Manipur           | 42                                             | 0                                            | 75            | 925  | 0    | 1000  | 115                                          | 542           | 79   | 264  | 1000  | 192                 | 116    |  |
| Meghalaya         | 55                                             | 0                                            | 788           | 0    | 212  | 1000  | 135                                          | 839           | 18   | 8    | 1000  | 42                  | 34     |  |
| Mizoram           | 123                                            | 0                                            | 460           | 239  | 301  | 1000  | 42                                           | 367           | 17   | 574  | 1000  | 85                  | 142    |  |
| Nagaland          | 255                                            | 162                                          | 712           | 125  | 0    | 1000  | 80                                           | 727           | 24   | 169  | 1000  | 68                  | 24     |  |
| Orissa            | 152                                            | 62                                           | 329           | 609  | 0    | 1000  | 70                                           | 783           | 113  | 34   | 1000  | 1546                | 148    |  |
| Punjab            | 296                                            | 154                                          | 545           | 253  | 48   | 1000  | 126                                          | 758           | 102  | 15   | 1000  | 2565                | 165    |  |
| Rajasthan         | 290                                            | 9                                            | 412           | 579  | 0    | 1000  | 118                                          | 709           | 171  | 2    | 1000  | 3012                | 271    |  |
| Sikkim            | 29                                             | 0                                            | 556           | 444  | 0    | 1000  | 67                                           | 907           | 27   | 0    | 1000  | 11                  | 16     |  |
| Tamil Nadu        | 311                                            | 14                                           | 858           | 128  | 0    | 1000  | 113                                          | 828           | 59   | 0    | 1000  | 7955                | 587    |  |
| Tripura           | 294                                            | 0                                            | 975           | 25   | 0    | 1000  | 13                                           | 779           | 159  | 49   | 1000  | 130                 | 45     |  |

Continued

Table (17.2): Per 1000 distribution of aged persons with illness or otherwise by their perception about current state of health for each sex

| Urban                          |                                                |                                              |               |      |      |       |                                              |               |      |      |       | Males               |        |
|--------------------------------|------------------------------------------------|----------------------------------------------|---------------|------|------|-------|----------------------------------------------|---------------|------|------|-------|---------------------|--------|
| state/ut                       | no. per 1000 of aged persons reporting illness | aged person with illness                     |               |      |      |       | aged person without illness                  |               |      |      |       | no. of aged persons |        |
|                                |                                                | own perception about current state of health |               |      |      |       | own perception about current state of health |               |      |      |       |                     |        |
|                                |                                                | excellent/<br>very good                      | good/<br>fair | poor | n.r. | total | excellent/<br>very good                      | good/<br>fair | poor | n.r. | total | estd.<br>(00)       | sample |
| (1)                            | (2)                                            | (3)                                          | (4)           | (5)  | (6)  | (7)   | (8)                                          | (9)           | (10) | (11) | (12)  | (13)                | (14)   |
| Uttaranchal                    | 338                                            | 0                                            | 832           | 168  | 0    | 1000  | 218                                          | 776           | 6    | 0    | 1000  | 558                 | 49     |
| Uttar Pradesh                  | 305                                            | 18                                           | 574           | 386  | 21   | 1000  | 51                                           | 740           | 141  | 68   | 1000  | 9104                | 620    |
| West Bengal                    | 495                                            | 37                                           | 626           | 321  | 16   | 1000  | 94                                           | 706           | 123  | 76   | 1000  | 8725                | 522    |
| A & N Islands                  | 348                                            | 0                                            | 861           | 139  | 0    | 1000  | 164                                          | 770           | 21   | 45   | 1000  | 18                  | 18     |
| Chandigarh                     | 181                                            | 112                                          | 876           | 12   | 0    | 1000  | 47                                           | 879           | 75   | 0    | 1000  | 197                 | 69     |
| Dadra & N. Haveli              | 9                                              | 0                                            | 0             | 1000 | 0    | 1000  | 86                                           | 894           | 19   | 0    | 1000  | 4                   | 13     |
| Daman & Diu                    | 201                                            | 0                                            | 534           | 466  | 0    | 1000  | 117                                          | 678           | 205  | 0    | 1000  | 10                  | 16     |
| Lakshadweep                    | 492                                            | 0                                            | 512           | 488  | 0    | 1000  | 0                                            | 1000          | 0    | 0    | 1000  | 8                   | 21     |
| Pondicherry                    | 599                                            | 0                                            | 450           | 550  | 0    | 1000  | 129                                          | 830           | 41   | 0    | 1000  | 218                 | 47     |
| OENS                           | 144                                            | 37                                           | 740           | 174  | 49   | 1000  | 78                                           | 610           | 72   | 239  | 1000  | 538                 | 419    |
| GUTs                           | 393                                            | 22                                           | 552           | 426  | 0    | 1000  | 80                                           | 855           | 63   | 2    | 1000  | 455                 | 184    |
| all-India                      | 360                                            | 31                                           | 635           | 324  | 11   | 1000  | 110                                          | 747           | 107  | 36   | 1000  | 78751               | 6222   |
| estd. no. of aged persons (00) | 78751                                          | 873                                          | 17988         | 9173 | 307  | 28341 | 5534                                         | 37672         | 5396 | 1808 | 50410 | X                   | X      |
| sample aged persons            | 6222                                           | 50                                           | 1264          | 749  | 34   | 2097  | 448                                          | 3014          | 429  | 234  | 4125  | X                   | X      |

Table (17.2): Per 1000 distribution of aged persons with illness or otherwise by their perception about current state of health for each sex

| Urban             |                                                |                                              |               |      |      |       |                                              |               |      |      |       |                     | Females |  |
|-------------------|------------------------------------------------|----------------------------------------------|---------------|------|------|-------|----------------------------------------------|---------------|------|------|-------|---------------------|---------|--|
| state/ut          | no. per 1000 of aged persons reporting illness | aged person with illness                     |               |      |      |       | aged person without illness                  |               |      |      |       | no. of aged persons |         |  |
|                   |                                                | own perception about current state of health |               |      |      |       | own perception about current state of health |               |      |      |       |                     |         |  |
|                   |                                                | excellent/<br>very good                      | good/<br>fair | poor | n.r. | total | excellent/<br>very good                      | good/<br>fair | poor | n.r. | total | estd.<br>(00)       | sample  |  |
| (1)               | (2)                                            | (3)                                          | (4)           | (5)  | (6)  | (7)   | (8)                                          | (9)           | (10) | (11) | (12)  | (13)                | (14)    |  |
| Andhra Pradesh    | 565                                            | 51                                           | 631           | 302  | 16   | 1000  | 9                                            | 879           | 83   | 29   | 1000  | 6160                | 421     |  |
| Arunachal Pradesh | 211                                            | 43                                           | 559           | 269  | 129  | 1000  | 81                                           | 293           | 48   | 578  | 1000  | 7                   | 30      |  |
| Assam             | 322                                            | 0                                            | 629           | 347  | 24   | 1000  | 0                                            | 742           | 125  | 134  | 1000  | 532                 | 85      |  |
| Bihar             | 252                                            | 0                                            | 565           | 421  | 14   | 1000  | 74                                           | 646           | 191  | 89   | 1000  | 1829                | 145     |  |
| Chhattisgarh      | 229                                            | 0                                            | 573           | 427  | 0    | 1000  | 30                                           | 765           | 206  | 0    | 1000  | 760                 | 88      |  |
| Delhi             | 155                                            | 0                                            | 669           | 322  | 10   | 1000  | 93                                           | 782           | 112  | 13   | 1000  | 2129                | 207     |  |
| Goa               | 420                                            | 0                                            | 376           | 624  | 0    | 1000  | 129                                          | 654           | 217  | 0    | 1000  | 256                 | 40      |  |
| Gujarat           | 297                                            | 12                                           | 683           | 305  | 0    | 1000  | 87                                           | 843           | 57   | 12   | 1000  | 5101                | 319     |  |
| Haryana           | 258                                            | 17                                           | 656           | 327  | 0    | 1000  | 151                                          | 683           | 123  | 43   | 1000  | 1725                | 143     |  |
| Himachal Pradesh  | 311                                            | 0                                            | 969           | 0    | 31   | 1000  | 15                                           | 909           | 76   | 0    | 1000  | 155                 | 50      |  |
| Jammu & Kashmir   | 317                                            | 0                                            | 613           | 369  | 17   | 1000  | 58                                           | 792           | 140  | 10   | 1000  | 336                 | 91      |  |
| Jharkhand         | 113                                            | 0                                            | 327           | 627  | 46   | 1000  | 37                                           | 653           | 282  | 28   | 1000  | 1292                | 139     |  |
| Karnataka         | 372                                            | 0                                            | 622           | 378  | 0    | 1000  | 89                                           | 770           | 134  | 7    | 1000  | 4073                | 353     |  |
| Kerala            | 601                                            | 23                                           | 574           | 403  | 0    | 1000  | 72                                           | 698           | 176  | 55   | 1000  | 4686                | 322     |  |
| Madhya Pradesh    | 257                                            | 23                                           | 469           | 487  | 21   | 1000  | 72                                           | 686           | 186  | 56   | 1000  | 4466                | 327     |  |
| Maharashtra       | 440                                            | 21                                           | 681           | 284  | 15   | 1000  | 96                                           | 775           | 111  | 18   | 1000  | 13669               | 672     |  |
| Manipur           | 90                                             | 0                                            | 654           | 210  | 136  | 1000  | 82                                           | 465           | 108  | 346  | 1000  | 178                 | 115     |  |
| Meghalaya         | 218                                            | 0                                            | 607           | 393  | 0    | 1000  | 209                                          | 631           | 118  | 41   | 1000  | 48                  | 46      |  |
| Mizoram           | 124                                            | 0                                            | 296           | 275  | 429  | 1000  | 53                                           | 471           | 14   | 462  | 1000  | 60                  | 104     |  |
| Nagaland          | 0                                              | 0                                            | 0             | 0    | 0    | 0     | 735                                          | 265           | 0    | 0    | 1000  | 8                   | 5       |  |
| Orissa            | 211                                            | 32                                           | 624           | 344  | 0    | 1000  | 49                                           | 671           | 174  | 105  | 1000  | 1182                | 113     |  |
| Punjab            | 341                                            | 39                                           | 607           | 354  | 0    | 1000  | 66                                           | 767           | 152  | 16   | 1000  | 2347                | 164     |  |
| Rajasthan         | 257                                            | 0                                            | 541           | 459  | 0    | 1000  | 84                                           | 690           | 226  | 0    | 1000  | 3076                | 266     |  |
| Sikkim            | 262                                            | 0                                            | 481           | 519  | 0    | 1000  | 0                                            | 1000          | 0    | 0    | 1000  | 7                   | 13      |  |
| Tamil Nadu        | 353                                            | 15                                           | 774           | 210  | 0    | 1000  | 80                                           | 848           | 71   | 1    | 1000  | 8984                | 650     |  |
| Tripura           | 171                                            | 64                                           | 706           | 230  | 0    | 1000  | 11                                           | 669           | 221  | 100  | 1000  | 136                 | 54      |  |

Continued

Table (17.2): Per 1000 distribution of aged persons with illness or otherwise by their perception about current state of health for each sex

| Urban                          |                                                |                                              |               |       |      |       |                                              |               |      |      |       |                     | Females |  |
|--------------------------------|------------------------------------------------|----------------------------------------------|---------------|-------|------|-------|----------------------------------------------|---------------|------|------|-------|---------------------|---------|--|
| state/ut                       | no. per 1000 of aged persons reporting illness | aged person with illness                     |               |       |      |       | aged person without illness                  |               |      |      |       | no. of aged persons |         |  |
|                                |                                                | own perception about current state of health |               |       |      |       | own perception about current state of health |               |      |      |       |                     |         |  |
|                                |                                                | excellent/<br>very good                      | good/<br>fair | poor  | n.r. | total | excellent/<br>very good                      | good/<br>fair | poor | n.r. | total | estd.<br>(00)       | sample  |  |
| (1)                            | (2)                                            | (3)                                          | (4)           | (5)   | (6)  | (7)   | (8)                                          | (9)           | (10) | (11) | (12)  | (13)                | (14)    |  |
| Uttaranchal                    | 156                                            | 0                                            | 197           | 803   | 0    | 1000  | 0                                            | 902           | 60   | 38   | 1000  | 693                 | 49      |  |
| Uttar Pradesh                  | 377                                            | 10                                           | 500           | 443   | 46   | 1000  | 43                                           | 676           | 202  | 79   | 1000  | 9590                | 621     |  |
| West Bengal                    | 550                                            | 12                                           | 541           | 419   | 28   | 1000  | 31                                           | 697           | 212  | 59   | 1000  | 8315                | 506     |  |
| A & N Islands                  | 143                                            | 346                                          | 375           | 279   | 0    | 1000  | 158                                          | 674           | 101  | 67   | 1000  | 15                  | 22      |  |
| Chandigarh                     | 364                                            | 0                                            | 739           | 261   | 0    | 1000  | 80                                           | 854           | 50   | 16   | 1000  | 147                 | 68      |  |
| Dadra & N. Haveli              | 86                                             | 0                                            | 0             | 1000  | 0    | 1000  | 0                                            | 745           | 255  | 0    | 1000  | 3                   | 14      |  |
| Daman & Diu                    | 56                                             | 0                                            | 1000          | 0     | 0    | 1000  | 66                                           | 573           | 316  | 44   | 1000  | 16                  | 22      |  |
| Lakshadweep                    | 582                                            | 0                                            | 747           | 253   | 0    | 1000  | 245                                          | 696           | 59   | 0    | 1000  | 10                  | 24      |  |
| Pondicherry                    | 683                                            | 0                                            | 508           | 492   | 0    | 1000  | 29                                           | 971           | 0    | 0    | 1000  | 368                 | 56      |  |
| OENS                           | 136                                            | 26                                           | 614           | 268   | 92   | 1000  | 81                                           | 543           | 125  | 252  | 1000  | 444                 | 367     |  |
| GUTs                           | 562                                            | 2                                            | 552           | 446   | 0    | 1000  | 61                                           | 879           | 48   | 12   | 1000  | 560                 | 206     |  |
| all-India                      | 390                                            | 19                                           | 611           | 355   | 15   | 1000  | 69                                           | 753           | 143  | 36   | 1000  | 82359               | 6344    |  |
| estd. no. of aged persons (00) | 82359                                          | 601                                          | 19637         | 11426 | 495  | 32159 | 3456                                         | 37785         | 7169 | 1790 | 50200 | X                   | X       |  |
| sample aged persons            | 6344                                           | 38                                           | 1399          | 848   | 43   | 2328  | 252                                          | 2962          | 564  | 238  | 4016  | X                   | X       |  |

Table (17.2): Per 1000 distribution of aged persons with illness or otherwise by their perception about current state of health for each sex

| Urban             |                                                |                                              |               |      |      |       |                                              |               |      |      |       |                     | Persons |  |
|-------------------|------------------------------------------------|----------------------------------------------|---------------|------|------|-------|----------------------------------------------|---------------|------|------|-------|---------------------|---------|--|
| state/ut          | no. per 1000 of aged persons reporting illness | aged person with illness                     |               |      |      |       | aged person without illness                  |               |      |      |       | no. of aged persons |         |  |
|                   |                                                | own perception about current state of health |               |      |      |       | own perception about current state of health |               |      |      |       |                     |         |  |
|                   |                                                | excellent/<br>very good                      | good/<br>fair | poor | n.r. | total | excellent/<br>very good                      | good/<br>fair | poor | n.r. | total | estd.<br>(00)       | sample  |  |
| (1)               | (2)                                            | (3)                                          | (4)           | (5)  | (6)  | (7)   | (8)                                          | (9)           | (10) | (11) | (12)  | (13)                | (14)    |  |
| Andhra Pradesh    | 546                                            | 33                                           | 646           | 307  | 15   | 1000  | 60                                           | 838           | 65   | 36   | 1000  | 11470               | 798     |  |
| Arunachal Pradesh | 122                                            | 31                                           | 443           | 344  | 183  | 1000  | 60                                           | 292           | 71   | 577  | 1000  | 17                  | 72      |  |
| Assam             | 365                                            | 20                                           | 566           | 354  | 60   | 1000  | 12                                           | 771           | 98   | 118  | 1000  | 1180                | 194     |  |
| Bihar             | 249                                            | 8                                            | 535           | 450  | 6    | 1000  | 92                                           | 653           | 161  | 95   | 1000  | 4283                | 314     |  |
| Chhattisgarh      | 258                                            | 135                                          | 405           | 460  | 0    | 1000  | 61                                           | 725           | 214  | 0    | 1000  | 1401                | 151     |  |
| Delhi             | 145                                            | 0                                            | 666           | 329  | 5    | 1000  | 103                                          | 775           | 107  | 15   | 1000  | 4342                | 418     |  |
| Goa               | 299                                            | 0                                            | 319           | 681  | 0    | 1000  | 216                                          | 675           | 109  | 0    | 1000  | 485                 | 72      |  |
| Gujarat           | 339                                            | 32                                           | 692           | 275  | 0    | 1000  | 119                                          | 820           | 54   | 7    | 1000  | 9693                | 616     |  |
| Haryana           | 287                                            | 33                                           | 633           | 334  | 0    | 1000  | 157                                          | 705           | 108  | 30   | 1000  | 3040                | 275     |  |
| Himachal Pradesh  | 314                                            | 0                                            | 812           | 172  | 16   | 1000  | 16                                           | 944           | 40   | 0    | 1000  | 294                 | 99      |  |
| Jammu & Kashmir   | 356                                            | 0                                            | 622           | 372  | 7    | 1000  | 102                                          | 730           | 157  | 11   | 1000  | 744                 | 193     |  |
| Jharkhand         | 160                                            | 0                                            | 510           | 474  | 16   | 1000  | 79                                           | 696           | 202  | 22   | 1000  | 2664                | 305     |  |
| Karnataka         | 332                                            | 9                                            | 635           | 352  | 4    | 1000  | 97                                           | 787           | 102  | 13   | 1000  | 8098                | 698     |  |
| Kerala            | 572                                            | 33                                           | 564           | 396  | 7    | 1000  | 112                                          | 723           | 127  | 38   | 1000  | 8672                | 612     |  |
| Madhya Pradesh    | 254                                            | 12                                           | 486           | 491  | 11   | 1000  | 117                                          | 665           | 167  | 52   | 1000  | 8580                | 646     |  |
| Maharashtra       | 425                                            | 25                                           | 682           | 282  | 11   | 1000  | 100                                          | 755           | 121  | 24   | 1000  | 26513               | 1268    |  |
| Manipur           | 65                                             | 0                                            | 461           | 449  | 90   | 1000  | 100                                          | 506           | 92   | 302  | 1000  | 369                 | 231     |  |
| Meghalaya         | 141                                            | 0                                            | 640           | 321  | 39   | 1000  | 171                                          | 739           | 66   | 24   | 1000  | 90                  | 80      |  |
| Mizoram           | 123                                            | 0                                            | 391           | 254  | 355  | 1000  | 46                                           | 410           | 16   | 528  | 1000  | 145                 | 246     |  |
| Nagaland          | 229                                            | 162                                          | 712           | 125  | 0    | 1000  | 166                                          | 666           | 21   | 147  | 1000  | 76                  | 29      |  |
| Orissa            | 177                                            | 47                                           | 481           | 472  | 0    | 1000  | 61                                           | 737           | 138  | 64   | 1000  | 2729                | 261     |  |
| Punjab            | 317                                            | 95                                           | 577           | 305  | 24   | 1000  | 98                                           | 762           | 125  | 15   | 1000  | 4912                | 329     |  |
| Rajasthan         | 274                                            | 5                                            | 473           | 522  | 0    | 1000  | 101                                          | 699           | 199  | 1    | 1000  | 6088                | 537     |  |
| Sikkim            | 122                                            | 0                                            | 492           | 508  | 0    | 1000  | 44                                           | 938           | 18   | 0    | 1000  | 18                  | 29      |  |
| Tamil Nadu        | 333                                            | 15                                           | 811           | 174  | 0    | 1000  | 96                                           | 838           | 66   | 0    | 1000  | 16939               | 1237    |  |
| Tripura           | 231                                            | 24                                           | 873           | 102  | 0    | 1000  | 12                                           | 718           | 193  | 77   | 1000  | 267                 | 99      |  |

Continued



Table (17.2): Per 1000 distribution of aged persons with illness or otherwise by their perception about current state of health for each sex

| Urban                          |                                                |                                              |               |       |      |       |                                              |               |       |      |        | Persons             |        |
|--------------------------------|------------------------------------------------|----------------------------------------------|---------------|-------|------|-------|----------------------------------------------|---------------|-------|------|--------|---------------------|--------|
| state/ut                       | no. per 1000 of aged persons reporting illness | aged person with illness                     |               |       |      |       | aged person without illness                  |               |       |      |        | no. of aged persons |        |
|                                |                                                | own perception about current state of health |               |       |      |       | own perception about current state of health |               |       |      |        |                     |        |
|                                |                                                | excellent/<br>very good                      | good/<br>fair | poor  | n.r. | total | excellent/<br>very good                      | good/<br>fair | poor  | n.r. | total  | estd.<br>(00)       | sample |
| (1)                            | (2)                                            | (3)                                          | (4)           | (5)   | (6)  | (7)   | (8)                                          | (9)           | (10)  | (11) | (12)   | (13)                | (14)   |
| Uttaranchal                    | 237                                            | 0                                            | 600           | 400   | 0    | 1000  | 84                                           | 853           | 39    | 23   | 1000   | 1252                | 98     |
| Uttar Pradesh                  | 342                                            | 14                                           | 532           | 419   | 35   | 1000  | 47                                           | 709           | 170   | 73   | 1000   | 18694               | 1241   |
| West Bengal                    | 522                                            | 24                                           | 582           | 371   | 22   | 1000  | 66                                           | 702           | 164   | 69   | 1000   | 17040               | 1028   |
| A & N Islands                  | 254                                            | 88                                           | 737           | 174   | 0    | 1000  | 161                                          | 719           | 63    | 57   | 1000   | 33                  | 40     |
| Chandigarh                     | 259                                            | 45                                           | 794           | 162   | 0    | 1000  | 59                                           | 870           | 65    | 6    | 1000   | 344                 | 137    |
| Dadra & N. Haveli              | 45                                             | 0                                            | 0             | 1000  | 0    | 1000  | 47                                           | 827           | 126   | 0    | 1000   | 7                   | 27     |
| Daman & Diu                    | 112                                            | 0                                            | 678           | 322   | 0    | 1000  | 84                                           | 609           | 278   | 29   | 1000   | 26                  | 38     |
| Lakshadweep                    | 542                                            | 0                                            | 653           | 347   | 0    | 1000  | 125                                          | 845           | 30    | 0    | 1000   | 19                  | 45     |
| Pondicherry                    | 652                                            | 0                                            | 488           | 512   | 0    | 1000  | 72                                           | 911           | 18    | 0    | 1000   | 586                 | 103    |
| OENS                           | 140                                            | 32                                           | 685           | 215   | 68   | 1000  | 80                                           | 580           | 96    | 245  | 1000   | 983                 | 786    |
| GUTs                           | 486                                            | 10                                           | 552           | 439   | 0    | 1000  | 71                                           | 866           | 56    | 7    | 1000   | 1015                | 390    |
| all-India                      | 376                                            | 24                                           | 622           | 340   | 13   | 1000  | 89                                           | 750           | 125   | 36   | 1000   | 161110              | 12566  |
| estd. no. of aged persons (00) | 161110                                         | 1474                                         | 37625         | 20599 | 802  | 60500 | 8990                                         | 75457         | 12565 | 3598 | 100610 | X                   | X      |
| sample aged persons            | 12566                                          | 88                                           | 2663          | 1597  | 77   | 4425  | 700                                          | 5976          | 993   | 472  | 8141   | X                   | X      |

Table (17.2): Per 1000 distribution of aged persons with illness or otherwise by their perception about current state of health for each sex

| Rural + Urban     |                                                |                                              |               |      |      |       |                                              |               |      |      |       | Males               |        |
|-------------------|------------------------------------------------|----------------------------------------------|---------------|------|------|-------|----------------------------------------------|---------------|------|------|-------|---------------------|--------|
| state/ut          | no. per 1000 of aged persons reporting illness | aged person with illness                     |               |      |      |       | aged person without illness                  |               |      |      |       | no. of aged persons |        |
|                   |                                                | own perception about current state of health |               |      |      |       | own perception about current state of health |               |      |      |       |                     |        |
|                   |                                                | excellent/<br>very good                      | good/<br>fair | poor | n.r. | total | excellent/<br>very good                      | good/<br>fair | poor | n.r. | total | estd.<br>(00)       | sample |
| (1)               | (2)                                            | (3)                                          | (4)           | (5)  | (6)  | (7)   | (8)                                          | (9)           | (10) | (11) | (12)  | (13)                | (14)   |
| Andhra Pradesh    | 389                                            | 19                                           | 600           | 363  | 18   | 1000  | 52                                           | 789           | 134  | 26   | 1000  | 24041               | 1074   |
| Arunachal Pradesh | 251                                            | 154                                          | 377           | 295  | 174  | 1000  | 54                                           | 371           | 57   | 518  | 1000  | 248                 | 182    |
| Assam             | 375                                            | 12                                           | 607           | 317  | 64   | 1000  | 23                                           | 724           | 135  | 119  | 1000  | 6750                | 580    |
| Bihar             | 194                                            | 6                                            | 552           | 431  | 11   | 1000  | 89                                           | 666           | 155  | 90   | 1000  | 21316               | 1081   |
| Chhattisgarh      | 181                                            | 51                                           | 472           | 476  | 0    | 1000  | 72                                           | 763           | 114  | 52   | 1000  | 5250                | 267    |
| Delhi             | 118                                            | 0                                            | 663           | 337  | 0    | 1000  | 110                                          | 764           | 112  | 13   | 1000  | 2551                | 227    |
| Goa               | 498                                            | 0                                            | 754           | 246  | 0    | 1000  | 372                                          | 552           | 75   | 0    | 1000  | 735                 | 51     |
| Gujarat           | 376                                            | 43                                           | 742           | 215  | 0    | 1000  | 114                                          | 802           | 77   | 6    | 1000  | 15050               | 648    |
| Haryana           | 265                                            | 17                                           | 619           | 364  | 0    | 1000  | 101                                          | 791           | 105  | 3    | 1000  | 6923                | 384    |
| Himachal Pradesh  | 299                                            | 23                                           | 564           | 413  | 0    | 1000  | 99                                           | 801           | 74   | 26   | 1000  | 2539                | 396    |
| Jammu & Kashmir   | 347                                            | 0                                            | 525           | 475  | 0    | 1000  | 101                                          | 784           | 83   | 31   | 1000  | 2654                | 332    |
| Jharkhand         | 115                                            | 41                                           | 611           | 313  | 35   | 1000  | 55                                           | 674           | 220  | 51   | 1000  | 7772                | 496    |
| Karnataka         | 326                                            | 11                                           | 591           | 397  | 2    | 1000  | 127                                          | 786           | 74   | 13   | 1000  | 15667               | 773    |
| Kerala            | 570                                            | 15                                           | 469           | 497  | 19   | 1000  | 60                                           | 776           | 159  | 6    | 1000  | 15659               | 795    |
| Madhya Pradesh    | 236                                            | 7                                            | 517           | 477  | 0    | 1000  | 102                                          | 696           | 163  | 40   | 1000  | 18781               | 868    |
| Maharashtra       | 351                                            | 22                                           | 676           | 284  | 18   | 1000  | 106                                          | 744           | 133  | 17   | 1000  | 36191               | 1313   |
| Manipur           | 63                                             | 41                                           | 97            | 714  | 148  | 1000  | 174                                          | 466           | 86   | 274  | 1000  | 587                 | 327    |
| Meghalaya         | 161                                            | 0                                            | 688           | 306  | 6    | 1000  | 187                                          | 743           | 23   | 47   | 1000  | 510                 | 130    |
| Mizoram           | 105                                            | 0                                            | 476           | 324  | 200  | 1000  | 86                                           | 317           | 34   | 562  | 1000  | 204                 | 231    |
| Nagaland          | 252                                            | 155                                          | 499           | 302  | 44   | 1000  | 146                                          | 661           | 75   | 118  | 1000  | 178                 | 80     |
| Orissa            | 165                                            | 6                                            | 479           | 486  | 29   | 1000  | 59                                           | 727           | 177  | 37   | 1000  | 14917               | 673    |
| Punjab            | 309                                            | 67                                           | 700           | 221  | 13   | 1000  | 107                                          | 787           | 88   | 18   | 1000  | 9408                | 423    |
| Rajasthan         | 193                                            | 12                                           | 513           | 475  | 0    | 1000  | 97                                           | 743           | 153  | 7    | 1000  | 15208               | 823    |
| Sikkim            | 183                                            | 0                                            | 430           | 570  | 0    | 1000  | 160                                          | 744           | 87   | 10   | 1000  | 126                 | 126    |
| Tamil Nadu        | 297                                            | 22                                           | 769           | 209  | 1    | 1000  | 83                                           | 827           | 88   | 1    | 1000  | 24916               | 1158   |
| Tripura           | 279                                            | 16                                           | 811           | 134  | 39   | 1000  | 62                                           | 769           | 88   | 80   | 1000  | 1057                | 216    |

Continued

Table (17.2): Per 1000 distribution of aged persons with illness or otherwise by their perception about current state of health for each sex

| Rural + Urban                  |                                                |                                              |               |       |      |        |                                              |               |       |       |        | Males               |        |
|--------------------------------|------------------------------------------------|----------------------------------------------|---------------|-------|------|--------|----------------------------------------------|---------------|-------|-------|--------|---------------------|--------|
| state/ut                       | no. per 1000 of aged persons reporting illness | aged person with illness                     |               |       |      |        | aged person without illness                  |               |       |       |        | no. of aged persons |        |
|                                |                                                | own perception about current state of health |               |       |      |        | own perception about current state of health |               |       |       |        |                     |        |
|                                |                                                | excellent/<br>very good                      | good/<br>fair | poor  | n.r. | total  | excellent/<br>very good                      | good/<br>fair | poor  | n.r.  | total  | estd.<br>(00)       | sample |
| (1)                            | (2)                                            | (3)                                          | (4)           | (5)   | (6)  | (7)    | (8)                                          | (9)           | (10)  | (11)  | (12)   | (13)                | (14)   |
| Uttaranchal                    | 195                                            | 24                                           | 547           | 430   | 0    | 1000   | 69                                           | 787           | 83    | 61    | 1000   | 3232                | 151    |
| Uttar Pradesh                  | 294                                            | 29                                           | 541           | 399   | 32   | 1000   | 63                                           | 699           | 133   | 106   | 1000   | 51892               | 2445   |
| West Bengal                    | 411                                            | 27                                           | 485           | 467   | 22   | 1000   | 84                                           | 638           | 166   | 112   | 1000   | 26855               | 1202   |
| A & N Islands                  | 319                                            | 0                                            | 958           | 42    | 0    | 1000   | 146                                          | 842           | 4     | 8     | 1000   | 94                  | 52     |
| Chandigarh                     | 192                                            | 101                                          | 812           | 87    | 0    | 1000   | 46                                           | 870           | 84    | 0     | 1000   | 205                 | 86     |
| Dadra & N. Haveli              | 13                                             | 0                                            | 0             | 1000  | 0    | 1000   | 127                                          | 828           | 45    | 0     | 1000   | 82                  | 33     |
| Daman & Diu                    | 142                                            | 0                                            | 534           | 466   | 0    | 1000   | 77                                           | 788           | 135   | 0     | 1000   | 14                  | 23     |
| Lakshadweep                    | 451                                            | 0                                            | 662           | 338   | 0    | 1000   | 0                                            | 975           | 25    | 0     | 1000   | 15                  | 37     |
| Pondicherry                    | 571                                            | 0                                            | 573           | 427   | 0    | 1000   | 70                                           | 908           | 22    | 0     | 1000   | 379                 | 67     |
| OENS                           | 194                                            | 40                                           | 646           | 253   | 61   | 1000   | 121                                          | 619           | 68    | 191   | 1000   | 2909                | 1292   |
| GUTs                           | 375                                            | 13                                           | 644           | 343   | 0    | 1000   | 80                                           | 872           | 47    | 1     | 1000   | 789                 | 298    |
| all-India                      | 308                                            | 22                                           | 587           | 374   | 17   | 1000   | 84                                           | 734           | 132   | 49    | 1000   | 332005              | 17750  |
| estd. no. of aged persons (00) | 332005                                         | 2288                                         | 60159         | 38265 | 1698 | 102409 | 19307                                        | 168605        | 30385 | 11298 | 229596 | X                   | X      |
| sample aged persons            | 17750                                          | 111                                          | 3049          | 2234  | 104  | 5498   | 1078                                         | 8796          | 1652  | 726   | 12252  | X                   | X      |

Table (17.2): Per 1000 distribution of aged persons with illness or otherwise by their perception about current state of health for each sex

| Rural + Urban     |                                                |                                              |               |      |      |       |                                              |               |      |      |       |                     | Females |  |
|-------------------|------------------------------------------------|----------------------------------------------|---------------|------|------|-------|----------------------------------------------|---------------|------|------|-------|---------------------|---------|--|
| state/ut          | no. per 1000 of aged persons reporting illness | aged person with illness                     |               |      |      |       | aged person without illness                  |               |      |      |       | no. of aged persons |         |  |
|                   |                                                | own perception about current state of health |               |      |      |       | own perception about current state of health |               |      |      |       |                     |         |  |
|                   |                                                | excellent/<br>very good                      | good/<br>fair | poor | n.r. | total | excellent/<br>very good                      | good/<br>fair | poor | n.r. | total | estd.<br>(00)       | sample  |  |
| (1)               | (2)                                            | (3)                                          | (4)           | (5)  | (6)  | (7)   | (8)                                          | (9)           | (10) | (11) | (12)  | (13)                | (14)    |  |
| Andhra Pradesh    | 420                                            | 22                                           | 507           | 448  | 23   | 1000  | 29                                           | 813           | 135  | 23   | 1000  | 26195               | 1109    |  |
| Arunachal Pradesh | 221                                            | 1                                            | 270           | 425  | 304  | 1000  | 71                                           | 459           | 55   | 415  | 1000  | 211                 | 148     |  |
| Assam             | 406                                            | 9                                            | 418           | 496  | 77   | 1000  | 1                                            | 757           | 107  | 135  | 1000  | 4806                | 408     |  |
| Bihar             | 168                                            | 1                                            | 467           | 470  | 62   | 1000  | 37                                           | 613           | 229  | 121  | 1000  | 17087               | 823     |  |
| Chhattisgarh      | 156                                            | 40                                           | 419           | 509  | 32   | 1000  | 35                                           | 795           | 133  | 37   | 1000  | 7440                | 378     |  |
| Delhi             | 134                                            | 0                                            | 669           | 322  | 10   | 1000  | 79                                           | 807           | 103  | 11   | 1000  | 2452                | 224     |  |
| Goa               | 567                                            | 0                                            | 705           | 295  | 0    | 1000  | 162                                          | 630           | 209  | 0    | 1000  | 871                 | 72      |  |
| Gujarat           | 262                                            | 32                                           | 676           | 292  | 0    | 1000  | 52                                           | 868           | 75   | 5    | 1000  | 15501               | 689     |  |
| Haryana           | 226                                            | 5                                            | 625           | 370  | 0    | 1000  | 68                                           | 785           | 137  | 10   | 1000  | 7235                | 375     |  |
| Himachal Pradesh  | 269                                            | 7                                            | 559           | 420  | 14   | 1000  | 20                                           | 864           | 79   | 37   | 1000  | 2701                | 396     |  |
| Jammu & Kashmir   | 349                                            | 0                                            | 308           | 687  | 5    | 1000  | 36                                           | 784           | 171  | 9    | 1000  | 1891                | 264     |  |
| Jharkhand         | 79                                             | 0                                            | 567           | 403  | 29   | 1000  | 59                                           | 574           | 330  | 36   | 1000  | 5733                | 370     |  |
| Karnataka         | 293                                            | 0                                            | 541           | 459  | 0    | 1000  | 53                                           | 840           | 96   | 11   | 1000  | 14951               | 756     |  |
| Kerala            | 595                                            | 8                                            | 510           | 476  | 6    | 1000  | 29                                           | 688           | 228  | 55   | 1000  | 19699               | 971     |  |
| Madhya Pradesh    | 215                                            | 46                                           | 461           | 468  | 25   | 1000  | 60                                           | 718           | 177  | 44   | 1000  | 19166               | 871     |  |
| Maharashtra       | 353                                            | 10                                           | 654           | 310  | 25   | 1000  | 60                                           | 814           | 108  | 18   | 1000  | 38001               | 1388    |  |
| Manipur           | 91                                             | 0                                            | 533           | 414  | 52   | 1000  | 88                                           | 542           | 117  | 253  | 1000  | 456                 | 278     |  |
| Meghalaya         | 190                                            | 0                                            | 467           | 466  | 67   | 1000  | 94                                           | 714           | 134  | 58   | 1000  | 479                 | 141     |  |
| Mizoram           | 114                                            | 0                                            | 339           | 279  | 382  | 1000  | 63                                           | 427           | 36   | 474  | 1000  | 137                 | 152     |  |
| Nagaland          | 123                                            | 0                                            | 379           | 621  | 0    | 1000  | 138                                          | 545           | 225  | 91   | 1000  | 47                  | 29      |  |
| Orissa            | 166                                            | 9                                            | 420           | 571  | 0    | 1000  | 23                                           | 632           | 308  | 37   | 1000  | 13339               | 596     |  |
| Punjab            | 400                                            | 17                                           | 593           | 387  | 4    | 1000  | 64                                           | 774           | 158  | 5    | 1000  | 8865                | 403     |  |
| Rajasthan         | 158                                            | 19                                           | 464           | 517  | 0    | 1000  | 63                                           | 740           | 197  | 0    | 1000  | 16075               | 849     |  |
| Sikkim            | 208                                            | 0                                            | 619           | 381  | 0    | 1000  | 41                                           | 783           | 82   | 94   | 1000  | 116                 | 107     |  |
| Tamil Nadu        | 319                                            | 38                                           | 741           | 221  | 0    | 1000  | 73                                           | 848           | 77   | 3    | 1000  | 26130               | 1199    |  |
| Tripura           | 309                                            | 6                                            | 647           | 336  | 11   | 1000  | 9                                            | 783           | 164  | 44   | 1000  | 812                 | 189     |  |

Continued

Table (17.2): Per 1000 distribution of aged persons with illness or otherwise by their perception about current state of health for each sex

| Rural + Urban                  |                                                |                                              |               |       |      |        |                                              |               |       |       |        | Females             |        |
|--------------------------------|------------------------------------------------|----------------------------------------------|---------------|-------|------|--------|----------------------------------------------|---------------|-------|-------|--------|---------------------|--------|
| state/ut                       | no. per 1000 of aged persons reporting illness | aged person with illness                     |               |       |      |        | aged person without illness                  |               |       |       |        | no. of aged persons |        |
|                                |                                                | own perception about current state of health |               |       |      |        | own perception about current state of health |               |       |       |        |                     |        |
|                                |                                                | excellent/<br>very good                      | good/<br>fair | poor  | n.r. | total  | excellent/<br>very good                      | good/<br>fair | poor  | n.r.  | total  | estd.<br>(00)       | sample |
| (1)                            | (2)                                            | (3)                                          | (4)           | (5)   | (6)  | (7)    | (8)                                          | (9)           | (10)  | (11)  | (12)   | (13)                | (14)   |
| Uttaranchal                    | 140                                            | 0                                            | 647           | 353   | 0    | 1000   | 0                                            | 817           | 165   | 18    | 1000   | 2884                | 139    |
| Uttar Pradesh                  | 293                                            | 16                                           | 465           | 477   | 43   | 1000   | 43                                           | 661           | 195   | 102   | 1000   | 50887               | 2270   |
| West Bengal                    | 437                                            | 7                                            | 477           | 474   | 41   | 1000   | 21                                           | 599           | 272   | 108   | 1000   | 26787               | 1192   |
| A & N Islands                  | 185                                            | 69                                           | 369           | 563   | 0    | 1000   | 229                                          | 583           | 27    | 160   | 1000   | 58                  | 37     |
| Chandigarh                     | 361                                            | 0                                            | 746           | 254   | 0    | 1000   | 76                                           | 834           | 75    | 15    | 1000   | 155                 | 79     |
| Dadra & N. Haveli              | 94                                             | 0                                            | 0             | 1000  | 0    | 1000   | 0                                            | 952           | 48    | 0     | 1000   | 42                  | 24     |
| Daman & Diu                    | 102                                            | 0                                            | 872           | 128   | 0    | 1000   | 38                                           | 751           | 186   | 25    | 1000   | 29                  | 35     |
| Lakshadweep                    | 598                                            | 0                                            | 846           | 154   | 0    | 1000   | 158                                          | 809           | 33    | 0     | 1000   | 19                  | 46     |
| Pondicherry                    | 695                                            | 0                                            | 595           | 405   | 0    | 1000   | 21                                           | 979           | 0     | 0     | 1000   | 516                 | 74     |
| OENS                           | 211                                            | 3                                            | 551           | 380   | 65   | 1000   | 60                                           | 652           | 125   | 163   | 1000   | 2257                | 1044   |
| GUTs                           | 541                                            | 2                                            | 612           | 387   | 0    | 1000   | 64                                           | 869           | 42    | 26    | 1000   | 821                 | 295    |
| all-India                      | 312                                            | 16                                           | 542           | 419   | 23   | 1000   | 47                                           | 736           | 170   | 48    | 1000   | 331775              | 17081  |
| estd. no. of aged persons (00) | 331775                                         | 1636                                         | 56156         | 43437 | 2331 | 103560 | 10691                                        | 167940        | 38684 | 10899 | 228214 | X                   | X      |
| sample aged persons            | 17081                                          | 71                                           | 2927          | 2317  | 127  | 5442   | 568                                          | 8365          | 2013  | 693   | 11639  | X                   | X      |

Table (17.2): Per 1000 distribution of aged persons with illness or otherwise by their perception about current state of health for each sex

| Rural + Urban     |                                                |                                              |               |      |      |       |                                              |               |      |      |       | Persons             |        |
|-------------------|------------------------------------------------|----------------------------------------------|---------------|------|------|-------|----------------------------------------------|---------------|------|------|-------|---------------------|--------|
| state/ut          | no. per 1000 of aged persons reporting illness | aged person with illness                     |               |      |      |       | aged person without illness                  |               |      |      |       | no. of aged persons |        |
|                   |                                                | own perception about current state of health |               |      |      |       | own perception about current state of health |               |      |      |       |                     |        |
|                   |                                                | excellent/<br>very good                      | good/<br>fair | poor | n.r. | total | excellent/<br>very good                      | good/<br>fair | poor | n.r. | total | estd.<br>(00)       | sample |
| (1)               | (2)                                            | (3)                                          | (4)           | (5)  | (6)  | (7)   | (8)                                          | (9)           | (10) | (11) | (12)  | (13)                | (14)   |
| Andhra Pradesh    | 405                                            | 21                                           | 550           | 409  | 21   | 1000  | 40                                           | 801           | 134  | 25   | 1000  | 50236               | 2183   |
| Arunachal Pradesh | 237                                            | 89                                           | 331           | 350  | 230  | 1000  | 62                                           | 412           | 56   | 470  | 1000  | 460                 | 330    |
| Assam             | 388                                            | 11                                           | 525           | 395  | 69   | 1000  | 14                                           | 737           | 124  | 125  | 1000  | 11556               | 988    |
| Bihar             | 183                                            | 4                                            | 517           | 447  | 32   | 1000  | 65                                           | 642           | 188  | 104  | 1000  | 38403               | 1904   |
| Chhattisgarh      | 166                                            | 45                                           | 443           | 495  | 18   | 1000  | 50                                           | 782           | 125  | 43   | 1000  | 12690               | 645    |
| Delhi             | 126                                            | 0                                            | 666           | 329  | 5    | 1000  | 95                                           | 785           | 108  | 12   | 1000  | 5002                | 451    |
| Goa               | 536                                            | 0                                            | 726           | 274  | 0    | 1000  | 266                                          | 591           | 143  | 0    | 1000  | 1606                | 123    |
| Gujarat           | 318                                            | 38                                           | 715           | 247  | 0    | 1000  | 80                                           | 838           | 76   | 5    | 1000  | 30551               | 1337   |
| Haryana           | 245                                            | 11                                           | 622           | 367  | 0    | 1000  | 84                                           | 788           | 122  | 7    | 1000  | 14158               | 759    |
| Himachal Pradesh  | 283                                            | 15                                           | 562           | 416  | 7    | 1000  | 58                                           | 834           | 77   | 32   | 1000  | 5240                | 792    |
| Jammu & Kashmir   | 348                                            | 0                                            | 434           | 563  | 2    | 1000  | 74                                           | 784           | 120  | 22   | 1000  | 4545                | 596    |
| Jharkhand         | 100                                            | 27                                           | 596           | 343  | 33   | 1000  | 57                                           | 631           | 268  | 44   | 1000  | 13505               | 866    |
| Karnataka         | 310                                            | 6                                            | 568           | 426  | 1    | 1000  | 90                                           | 813           | 85   | 12   | 1000  | 30618               | 1529   |
| Kerala            | 584                                            | 11                                           | 492           | 485  | 12   | 1000  | 43                                           | 728           | 196  | 32   | 1000  | 35359               | 1766   |
| Madhya Pradesh    | 226                                            | 26                                           | 490           | 473  | 12   | 1000  | 80                                           | 707           | 170  | 42   | 1000  | 37947               | 1739   |
| Maharashtra       | 352                                            | 16                                           | 665           | 297  | 22   | 1000  | 82                                           | 780           | 120  | 18   | 1000  | 74193               | 2701   |
| Manipur           | 75                                             | 19                                           | 327           | 556  | 98   | 1000  | 137                                          | 499           | 99   | 265  | 1000  | 1043                | 605    |
| Meghalaya         | 175                                            | 0                                            | 572           | 390  | 38   | 1000  | 143                                          | 729           | 76   | 52   | 1000  | 988                 | 271    |
| Mizoram           | 109                                            | 0                                            | 418           | 305  | 277  | 1000  | 77                                           | 361           | 35   | 527  | 1000  | 341                 | 383    |
| Nagaland          | 225                                            | 137                                          | 486           | 338  | 39   | 1000  | 144                                          | 634           | 111  | 112  | 1000  | 224                 | 109    |
| Orissa            | 165                                            | 7                                            | 451           | 526  | 15   | 1000  | 42                                           | 682           | 239  | 37   | 1000  | 28256               | 1269   |
| Punjab            | 353                                            | 39                                           | 641           | 312  | 8    | 1000  | 87                                           | 781           | 119  | 12   | 1000  | 18274               | 826    |
| Rajasthan         | 175                                            | 15                                           | 490           | 494  | 0    | 1000  | 79                                           | 741           | 176  | 4    | 1000  | 31284               | 1672   |
| Sikkim            | 195                                            | 0                                            | 527           | 473  | 0    | 1000  | 104                                          | 763           | 84   | 50   | 1000  | 242                 | 233    |
| Tamil Nadu        | 308                                            | 30                                           | 754           | 215  | 0    | 1000  | 78                                           | 838           | 82   | 2    | 1000  | 51046               | 2357   |
| Tripura           | 292                                            | 12                                           | 736           | 227  | 26   | 1000  | 40                                           | 775           | 120  | 65   | 1000  | 1869                | 405    |

Continued

Table (17.2): Per 1000 distribution of aged persons with illness or otherwise by their perception about current state of health for each sex

| Rural + Urban                  |                                                |                                              |               |       |      |        |                                              |               |       |       |        | Persons             |        |
|--------------------------------|------------------------------------------------|----------------------------------------------|---------------|-------|------|--------|----------------------------------------------|---------------|-------|-------|--------|---------------------|--------|
| state/ut                       | no. per 1000 of aged persons reporting illness | aged person with illness                     |               |       |      |        | aged person without illness                  |               |       |       |        | no. of aged persons |        |
|                                |                                                | own perception about current state of health |               |       |      |        | own perception about current state of health |               |       |       |        |                     |        |
|                                |                                                | excellent/<br>very good                      | good/<br>fair | poor  | n.r. | total  | excellent/<br>very good                      | good/<br>fair | poor  | n.r.  | total  | estd.<br>(00)       | sample |
| (1)                            | (2)                                            | (3)                                          | (4)           | (5)   | (6)  | (7)    | (8)                                          | (9)           | (10)  | (11)  | (12)   | (13)                | (14)   |
| Uttaranchal                    | 169                                            | 14                                           | 586           | 400   | 0    | 1000   | 35                                           | 802           | 123   | 40    | 1000   | 6116                | 290    |
| Uttar Pradesh                  | 293                                            | 22                                           | 503           | 437   | 37   | 1000   | 53                                           | 680           | 163   | 104   | 1000   | 102779              | 4715   |
| West Bengal                    | 424                                            | 17                                           | 481           | 471   | 32   | 1000   | 53                                           | 619           | 218   | 110   | 1000   | 53642               | 2394   |
| A & N Islands                  | 268                                            | 18                                           | 802           | 179   | 0    | 1000   | 181                                          | 732           | 14    | 73    | 1000   | 152                 | 89     |
| Chandigarh                     | 265                                            | 42                                           | 773           | 185   | 0    | 1000   | 57                                           | 857           | 81    | 6     | 1000   | 360                 | 165    |
| Dadra & N. Haveli              | 41                                             | 0                                            | 0             | 1000  | 0    | 1000   | 86                                           | 868           | 46    | 0     | 1000   | 124                 | 57     |
| Daman & Diu                    | 115                                            | 0                                            | 737           | 263   | 0    | 1000   | 50                                           | 763           | 170   | 17    | 1000   | 43                  | 58     |
| Lakshadweep                    | 533                                            | 0                                            | 777           | 223   | 0    | 1000   | 76                                           | 896           | 28    | 0     | 1000   | 35                  | 83     |
| Pondicherry                    | 642                                            | 0                                            | 587           | 413   | 0    | 1000   | 46                                           | 943           | 11    | 0     | 1000   | 895                 | 141    |
| OENS                           | 202                                            | 23                                           | 602           | 311   | 63   | 1000   | 95                                           | 634           | 93    | 179   | 1000   | 5167                | 2336   |
| GUTs                           | 460                                            | 6                                            | 624           | 369   | 0    | 1000   | 73                                           | 871           | 45    | 12    | 1000   | 1609                | 593    |
| all-India                      | 310                                            | 19                                           | 565           | 397   | 20   | 1000   | 66                                           | 735           | 151   | 48    | 1000   | 663779              | 34831  |
| estd. no. of aged persons (00) | 663779                                         | 3924                                         | 116315        | 81702 | 4029 | 205970 | 29998                                        | 336545        | 69069 | 22198 | 457810 | X                   | X      |
| sample aged persons            | 34831                                          | 182                                          | 5976          | 4551  | 231  | 10940  | 1646                                         | 17161         | 3665  | 1419  | 23891  | X                   | X      |



Table (18.1): Per 1000 distribution of aged persons with illness or otherwise by their perception about change in state of health for each quintile class and sex

| all-India<br>mpce class       | Rural                     |                 |                 |       |      |       |             | Males                       |                 |                 |       |      |       |        |                     |        |
|-------------------------------|---------------------------|-----------------|-----------------|-------|------|-------|-------------|-----------------------------|-----------------|-----------------|-------|------|-------|--------|---------------------|--------|
|                               | aged person with illness  |                 |                 |       |      |       |             | aged person without illness |                 |                 |       |      |       |        | no. of aged persons |        |
|                               | compared to previous year |                 |                 |       |      |       |             | compared to previous year   |                 |                 |       |      |       |        | estd.<br>(00)       | sample |
| much better                   | some-what better          | nearly the same | some-what worse | worse | n.r. | total | much better | some what better            | nearly the same | some what worse | worse | n.r. | total |        |                     |        |
| (1)                           | (2)                       | (3)             | (4)             | (5)   | (6)  | (7)   | (8)         | (9)                         | (10)            | (11)            | (12)  | (13) | (14)  | (15)   | (16)                | (17)   |
| 0 – 225                       | 9                         | 85              | 485             | 315   | 69   | 37    | 1000        | 42                          | 119             | 637             | 103   | 10   | 89    | 1000   | 9537                | 399    |
| 225 – 255                     | 37                        | 115             | 453             | 288   | 25   | 81    | 1000        | 30                          | 63              | 698             | 125   | 26   | 58    | 1000   | 8411                | 302    |
| 255 – 300                     | 30                        | 81              | 451             | 317   | 83   | 38    | 1000        | 39                          | 102             | 693             | 92    | 16   | 59    | 1000   | 20867               | 805    |
| 300 – 340                     | 1                         | 28              | 549             | 345   | 75   | 1     | 1000        | 23                          | 101             | 676             | 120   | 16   | 64    | 1000   | 17295               | 744    |
| 340 – 380                     | 6                         | 70              | 557             | 337   | 23   | 7     | 1000        | 26                          | 83              | 690             | 121   | 13   | 66    | 1000   | 22031               | 964    |
| 380 – 420                     | 56                        | 81              | 469             | 325   | 56   | 13    | 1000        | 47                          | 127             | 658             | 104   | 16   | 48    | 1000   | 24050               | 1046   |
| 420 – 470                     | 40                        | 91              | 489             | 279   | 66   | 34    | 1000        | 28                          | 95              | 729             | 107   | 7    | 34    | 1000   | 26188               | 1184   |
| 470 – 525                     | 10                        | 72              | 460             | 372   | 54   | 31    | 1000        | 30                          | 102             | 663             | 128   | 5    | 72    | 1000   | 27442               | 1281   |
| 525 – 615                     | 16                        | 92              | 505             | 312   | 58   | 17    | 1000        | 61                          | 98              | 684             | 107   | 2    | 47    | 1000   | 31708               | 1492   |
| 615 – 775                     | 19                        | 90              | 521             | 319   | 38   | 13    | 1000        | 31                          | 106             | 693             | 110   | 6    | 54    | 1000   | 32712               | 1576   |
| 775 – 950                     | 30                        | 125             | 504             | 294   | 33   | 13    | 1000        | 47                          | 148             | 709             | 82    | 4    | 9     | 1000   | 14637               | 810    |
| 950 +                         | 29                        | 109             | 489             | 339   | 34   | 0     | 1000        | 39                          | 155             | 694             | 71    | 7    | 34    | 1000   | 18376               | 925    |
| all classes                   | 24                        | 88              | 497             | 322   | 50   | 19    | 1000        | 37                          | 106             | 686             | 108   | 10   | 53    | 1000   | 253254              | 11528  |
| estd. no. of aged persons(00) | 1770                      | 6482            | 36817           | 23875 | 3717 | 1408  | 74068       | 6685                        | 19051           | 122990          | 19280 | 1732 | 9447  | 179186 | X                   | X      |
| sample aged persons           | 70                        | 336             | 1576            | 1109  | 237  | 73    | 3401        | 313                         | 935             | 5328            | 964   | 94   | 493   | 8127   | X                   | X      |

Table (18.1): Per 1000 distribution of aged persons with illness or otherwise by their perception about change in state of health for each quintile class and sex

| all-India<br>mpce class       | Rural                     |                 |                 |       |      |       |             | Females                     |                 |                 |       |      |       |        |                     |        |
|-------------------------------|---------------------------|-----------------|-----------------|-------|------|-------|-------------|-----------------------------|-----------------|-----------------|-------|------|-------|--------|---------------------|--------|
|                               | aged person with illness  |                 |                 |       |      |       |             | aged person without illness |                 |                 |       |      |       |        | no. of aged persons |        |
|                               | compared to previous year |                 |                 |       |      |       |             | compared to previous year   |                 |                 |       |      |       |        | estd. (00)          | sample |
| much better                   | some-what better          | nearly the same | some-what worse | worse | n.r. | total | much better | some what better            | nearly the same | some what worse | worse | n.r. | total |        |                     |        |
| (1)                           | (2)                       | (3)             | (4)             | (5)   | (6)  | (7)   | (8)         | (9)                         | (10)            | (11)            | (12)  | (13) | (14)  | (15)   | (16)                | (17)   |
| 0 – 225                       | 15                        | 48              | 539             | 348   | 46   | 4     | 1000        | 21                          | 150             | 609             | 145   | 11   | 65    | 1000   | 11222               | 415    |
| 225 – 255                     | 0                         | 93              | 521             | 335   | 52   | 0     | 1000        | 24                          | 66              | 617             | 167   | 34   | 92    | 1000   | 8828                | 320    |
| 255 – 300                     | 32                        | 58              | 422             | 356   | 105  | 27    | 1000        | 20                          | 101             | 668             | 143   | 10   | 59    | 1000   | 21088               | 797    |
| 300 – 340                     | 14                        | 27              | 532             | 288   | 109  | 30    | 1000        | 16                          | 115             | 685             | 119   | 4    | 60    | 1000   | 17861               | 716    |
| 340 – 380                     | 25                        | 89              | 469             | 312   | 64   | 41    | 1000        | 16                          | 75              | 691             | 147   | 20   | 52    | 1000   | 22651               | 891    |
| 380 – 420                     | 18                        | 56              | 530             | 287   | 81   | 28    | 1000        | 20                          | 91              | 679             | 129   | 18   | 63    | 1000   | 22017               | 930    |
| 420 – 470                     | 23                        | 59              | 542             | 263   | 53   | 59    | 1000        | 20                          | 79              | 704             | 130   | 15   | 52    | 1000   | 24398               | 1065   |
| 470 – 525                     | 19                        | 49              | 516             | 311   | 84   | 20    | 1000        | 26                          | 84              | 665             | 162   | 13   | 49    | 1000   | 27514               | 1214   |
| 525 – 615                     | 5                         | 74              | 513             | 326   | 57   | 26    | 1000        | 47                          | 91              | 659             | 150   | 12   | 42    | 1000   | 28621               | 1308   |
| 615 – 775                     | 26                        | 78              | 507             | 328   | 36   | 24    | 1000        | 25                          | 105             | 684             | 139   | 4    | 44    | 1000   | 29982               | 1407   |
| 775 – 950                     | 23                        | 67              | 512             | 350   | 30   | 17    | 1000        | 33                          | 147             | 659             | 131   | 10   | 20    | 1000   | 16256               | 776    |
| 950 +                         | 4                         | 118             | 527             | 312   | 31   | 8     | 1000        | 28                          | 153             | 641             | 129   | 13   | 36    | 1000   | 18978               | 898    |
| all classes                   | 18                        | 71              | 511             | 315   | 60   | 26    | 1000        | 25                          | 100             | 669             | 141   | 13   | 51    | 1000   | 249416              | 10737  |
| estd. no. of aged persons(00) | 1257                      | 5060            | 36465           | 22515 | 4268 | 1836  | 71401       | 4459                        | 17874           | 119180          | 25104 | 2266 | 9131  | 178015 | X                   | X      |
| sample aged persons           | 58                        | 234             | 1499            | 1023  | 216  | 84    | 3114        | 208                         | 737             | 4951            | 1146  | 122  | 459   | 7623   | X                   | X      |

Table (18.1): Per 1000 distribution of aged persons with illness or otherwise by their perception about change in state of health for each quintile class and sex

| mpce class                    | Rural                     |                 |                 |       |      |       |             | Persons                     |                 |                 |       |      |       |        |                     |        |
|-------------------------------|---------------------------|-----------------|-----------------|-------|------|-------|-------------|-----------------------------|-----------------|-----------------|-------|------|-------|--------|---------------------|--------|
|                               | aged person with illness  |                 |                 |       |      |       |             | aged person without illness |                 |                 |       |      |       |        | no. of aged persons |        |
|                               | compared to previous year |                 |                 |       |      |       |             | compared to previous year   |                 |                 |       |      |       |        | estd. (00)          | sample |
| much better                   | some-what better          | nearly the same | some-what worse | worse | n.r. | total | much better | some what better            | nearly the same | some what worse | worse | n.r. | total |        |                     |        |
| (1)                           | (2)                       | (3)             | (4)             | (5)   | (6)  | (7)   | (8)         | (9)                         | (10)            | (11)            | (12)  | (13) | (14)  | (15)   | (16)                | (17)   |
| 0 – 225                       | 12                        | 68              | 510             | 330   | 58   | 22    | 1000        | 30                          | 136             | 621             | 126   | 10   | 75    | 1000   | 20759               | 814    |
| 225 – 255                     | 18                        | 104             | 487             | 312   | 39   | 40    | 1000        | 27                          | 65              | 656             | 147   | 30   | 75    | 1000   | 17239               | 622    |
| 255 – 300                     | 31                        | 70              | 436             | 336   | 94   | 32    | 1000        | 29                          | 101             | 680             | 118   | 13   | 59    | 1000   | 41955               | 1602   |
| 300 – 340                     | 8                         | 28              | 540             | 314   | 94   | 17    | 1000        | 20                          | 108             | 681             | 120   | 10   | 62    | 1000   | 35156               | 1460   |
| 340 – 380                     | 16                        | 80              | 510             | 324   | 45   | 25    | 1000        | 21                          | 79              | 691             | 134   | 17   | 59    | 1000   | 44682               | 1855   |
| 380 – 420                     | 38                        | 70              | 497             | 308   | 67   | 20    | 1000        | 34                          | 109             | 668             | 116   | 17   | 55    | 1000   | 46067               | 1976   |
| 420 – 470                     | 33                        | 77              | 513             | 272   | 60   | 45    | 1000        | 24                          | 87              | 717             | 118   | 11   | 43    | 1000   | 50586               | 2249   |
| 470 – 525                     | 14                        | 61              | 488             | 342   | 69   | 26    | 1000        | 28                          | 93              | 664             | 145   | 9    | 61    | 1000   | 54956               | 2495   |
| 525 – 615                     | 11                        | 83              | 509             | 318   | 58   | 21    | 1000        | 54                          | 95              | 672             | 128   | 7    | 45    | 1000   | 60329               | 2800   |
| 615 – 775                     | 22                        | 84              | 515             | 323   | 37   | 18    | 1000        | 28                          | 105             | 689             | 124   | 5    | 49    | 1000   | 62693               | 2983   |
| 775 – 950                     | 26                        | 95              | 508             | 324   | 32   | 15    | 1000        | 40                          | 147             | 682             | 108   | 7    | 15    | 1000   | 30893               | 1586   |
| 950 +                         | 16                        | 113             | 509             | 325   | 32   | 4     | 1000        | 33                          | 154             | 667             | 100   | 10   | 35    | 1000   | 37355               | 1823   |
| all classes                   | 21                        | 79              | 504             | 319   | 55   | 22    | 1000        | 31                          | 103             | 678             | 124   | 11   | 52    | 1000   | 502670              | 22265  |
| estd. no. of aged persons(00) | 3027                      | 11542           | 73283           | 46390 | 7984 | 3244  | 145469      | 11144                       | 36925           | 242171          | 44384 | 3998 | 18578 | 357200 | X                   | X      |
| sample aged persons           | 128                       | 570             | 3075            | 2132  | 453  | 157   | 6515        | 521                         | 1672            | 10279           | 2110  | 216  | 952   | 15750  | X                   | X      |

Table (18.1): Per 1000 distribution of aged persons with illness or otherwise by their perception about change in state of health for each quintile class and sex

| all-India<br>mpce class       | Urban                     |                 |                 |       |      |       |             | Males                       |                 |                 |       |      |       |       |                     |        |
|-------------------------------|---------------------------|-----------------|-----------------|-------|------|-------|-------------|-----------------------------|-----------------|-----------------|-------|------|-------|-------|---------------------|--------|
|                               | aged person with illness  |                 |                 |       |      |       |             | aged person without illness |                 |                 |       |      |       |       | no. of aged persons |        |
|                               | compared to previous year |                 |                 |       |      |       |             | compared to previous year   |                 |                 |       |      |       |       | estd. (00)          | sample |
| much better                   | some-what better          | nearly the same | some-what worse | worse | n.r. | total | much better | some what better            | nearly the same | some what worse | worse | n.r. | total |       |                     |        |
| (1)                           | (2)                       | (3)             | (4)             | (5)   | (6)  | (7)   | (8)         | (9)                         | (10)            | (11)            | (12)  | (13) | (14)  | (15)  | (16)                | (17)   |
| 0 – 225                       | 17                        | 25              | 565             | 297   | 96   | 0     | 1000        | 6                           | 106             | 567             | 210   | 38   | 72    | 1000  | 1695                | 118    |
| 225 – 255                     | 0                         | 58              | 798             | 133   | 12   | 0     | 1000        | 23                          | 11              | 856             | 73    | 7    | 30    | 1000  | 1314                | 83     |
| 255 – 300                     | 13                        | 84              | 483             | 361   | 44   | 15    | 1000        | 27                          | 165             | 569             | 186   | 15   | 38    | 1000  | 3731                | 271    |
| 300 – 340                     | 6                         | 70              | 562             | 312   | 27   | 24    | 1000        | 36                          | 95              | 633             | 202   | 10   | 24    | 1000  | 7743                | 576    |
| 340 – 380                     | 8                         | 50              | 576             | 293   | 66   | 6     | 1000        | 39                          | 98              | 690             | 94    | 7    | 71    | 1000  | 3552                | 296    |
| 380 – 420                     | 36                        | 65              | 525             | 268   | 88   | 18    | 1000        | 12                          | 86              | 754             | 113   | 1    | 34    | 1000  | 5877                | 493    |
| 420 – 470                     | 7                         | 75              | 504             | 315   | 74   | 25    | 1000        | 25                          | 142             | 660             | 139   | 0    | 33    | 1000  | 8343                | 707    |
| 470 – 525                     | 38                        | 88              | 626             | 226   | 10   | 11    | 1000        | 32                          | 148             | 711             | 69    | 6    | 34    | 1000  | 8126                | 727    |
| 525 – 615                     | 24                        | 96              | 531             | 312   | 37   | 1     | 1000        | 57                          | 113             | 719             | 66    | 12   | 33    | 1000  | 10204               | 894    |
| 615 – 775                     | 31                        | 68              | 712             | 144   | 33   | 11    | 1000        | 45                          | 130             | 715             | 69    | 3    | 39    | 1000  | 13511               | 1031   |
| 775 – 950                     | 28                        | 136             | 619             | 199   | 16   | 2     | 1000        | 32                          | 115             | 786             | 32    | 7    | 28    | 1000  | 4443                | 350    |
| 950 +                         | 37                        | 99              | 599             | 209   | 48   | 7     | 1000        | 60                          | 147             | 722             | 39    | 7    | 25    | 1000  | 10211               | 676    |
| all classes                   | 25                        | 82              | 599             | 240   | 42   | 11    | 1000        | 37                          | 122             | 699             | 100   | 7    | 35    | 1000  | 78751               | 6222   |
| estd. no. of aged persons(00) | 719                       | 2313            | 16983           | 6809  | 1201 | 316   | 28341       | 1879                        | 6169            | 35215           | 5020  | 366  | 1760  | 50410 | X                   | X      |
| sample aged persons           | 55                        | 227             | 1115            | 562   | 103  | 35    | 2097        | 157                         | 524             | 2809            | 363   | 43   | 229   | 4125  | X                   | X      |

Table (18.1): Per 1000 distribution of aged persons with illness or otherwise by their perception about change in state of health for each quintile class and sex

| all-India<br>mpce class       | Urban                     |                 |                 |       |      |       |             |                             |                 |                 |       |      |       |       | Females             |        |
|-------------------------------|---------------------------|-----------------|-----------------|-------|------|-------|-------------|-----------------------------|-----------------|-----------------|-------|------|-------|-------|---------------------|--------|
|                               | aged person with illness  |                 |                 |       |      |       |             | aged person without illness |                 |                 |       |      |       |       | no. of aged persons |        |
|                               | compared to previous year |                 |                 |       |      |       |             | compared to previous year   |                 |                 |       |      |       |       | estd.<br>(00)       | sample |
| much better                   | some-what better          | nearly the same | some-what worse | worse | n.r. | total | much better | some what better            | nearly the same | some what worse | worse | n.r. | total |       |                     |        |
| (1)                           | (2)                       | (3)             | (4)             | (5)   | (6)  | (7)   | (8)         | (9)                         | (10)            | (11)            | (12)  | (13) | (14)  | (15)  | (16)                | (17)   |
| 0 – 225                       | 0                         | 60              | 591             | 280   | 68   | 0     | 1000        | 60                          | 74              | 556             | 189   | 17   | 104   | 1000  | 2745                | 170    |
| 225 – 255                     | 0                         | 40              | 505             | 415   | 40   | 0     | 1000        | 52                          | 18              | 646             | 210   | 10   | 64    | 1000  | 1461                | 111    |
| 255 – 300                     | 7                         | 30              | 463             | 406   | 70   | 24    | 1000        | 36                          | 146             | 601             | 149   | 27   | 41    | 1000  | 4458                | 315    |
| 300 – 340                     | 2                         | 51              | 554             | 306   | 62   | 26    | 1000        | 18                          | 100             | 736             | 122   | 4    | 19    | 1000  | 8766                | 643    |
| 340 – 380                     | 11                        | 35              | 591             | 301   | 55   | 6     | 1000        | 42                          | 107             | 691             | 64    | 11   | 85    | 1000  | 4032                | 304    |
| 380 – 420                     | 30                        | 90              | 505             | 260   | 89   | 27    | 1000        | 13                          | 72              | 777             | 78    | 13   | 47    | 1000  | 7321                | 565    |
| 420 – 470                     | 31                        | 50              | 614             | 239   | 43   | 23    | 1000        | 31                          | 138             | 699             | 89    | 6    | 37    | 1000  | 8550                | 710    |
| 470 – 525                     | 32                        | 89              | 567             | 281   | 27   | 4     | 1000        | 27                          | 109             | 704             | 123   | 17   | 21    | 1000  | 8554                | 733    |
| 525 – 615                     | 6                         | 140             | 492             | 296   | 59   | 6     | 1000        | 41                          | 129             | 693             | 109   | 5    | 24    | 1000  | 10703               | 892    |
| 615 – 775                     | 16                        | 81              | 679             | 194   | 18   | 12    | 1000        | 37                          | 134             | 713             | 76    | 16   | 24    | 1000  | 12163               | 972    |
| 775 – 950                     | 0                         | 95              | 563             | 316   | 20   | 5     | 1000        | 27                          | 129             | 724             | 62    | 16   | 42    | 1000  | 4024                | 310    |
| 950 +                         | 40                        | 78              | 590             | 224   | 42   | 25    | 1000        | 47                          | 112             | 726             | 81    | 11   | 22    | 1000  | 9582                | 619    |
| all classes                   | 19                        | 81              | 572             | 266   | 46   | 15    | 1000        | 33                          | 114             | 702             | 104   | 12   | 35    | 1000  | 82359               | 6344   |
| estd. no. of aged persons(00) | 618                       | 2600            | 18411           | 8569  | 1470 | 491   | 32159       | 1668                        | 5715            | 35239           | 5196  | 602  | 1778  | 50200 | X                   | X      |
| sample aged persons           | 48                        | 210             | 1268            | 645   | 115  | 42    | 2328        | 127                         | 482             | 2704            | 428   | 40   | 235   | 4016  | X                   | X      |

Table (18.1): Per 1000 distribution of aged persons with illness or otherwise by their perception about change in state of health for each quintile class and sex

| mpce class                    | aged person with illness  |                  |                 |                 |       |      |       | aged person without illness |                  |                 |                 |       |      |        | Persons    |        |
|-------------------------------|---------------------------|------------------|-----------------|-----------------|-------|------|-------|-----------------------------|------------------|-----------------|-----------------|-------|------|--------|------------|--------|
|                               | compared to previous year |                  |                 |                 |       |      |       | compared to previous year   |                  |                 |                 |       |      |        | estd. (00) | sample |
|                               | much better               | some-what better | nearly the same | some-what worse | worse | n.r. | total | much better                 | some what better | nearly the same | some what worse | worse | n.r. | total  |            |        |
| (1)                           | (2)                       | (3)              | (4)             | (5)             | (6)   | (7)  | (8)   | (9)                         | (10)             | (11)            | (12)            | (13)  | (14) | (15)   | (16)       | (17)   |
| 0 – 225                       | 8                         | 44               | 579             | 288             | 81    | 0    | 1000  | 41                          | 86               | 560             | 196             | 24    | 93   | 1000   | 4441       | 288    |
| 225 – 255                     | 0                         | 48               | 634             | 290             | 28    | 0    | 1000  | 38                          | 14               | 749             | 143             | 9     | 47   | 1000   | 2775       | 194    |
| 255 – 300                     | 10                        | 57               | 473             | 384             | 57    | 20   | 1000  | 32                          | 155              | 587             | 165             | 21    | 40   | 1000   | 8189       | 586    |
| 300 – 340                     | 4                         | 60               | 557             | 308             | 46    | 25   | 1000  | 26                          | 98               | 687             | 160             | 7     | 21   | 1000   | 16508      | 1219   |
| 340 – 380                     | 10                        | 42               | 584             | 298             | 60    | 6    | 1000  | 40                          | 103              | 691             | 79              | 9     | 79   | 1000   | 7583       | 600    |
| 380 – 420                     | 33                        | 80               | 512             | 263             | 88    | 23   | 1000  | 13                          | 79               | 766             | 95              | 7     | 41   | 1000   | 13198      | 1058   |
| 420 – 470                     | 20                        | 61               | 565             | 273             | 57    | 24   | 1000  | 28                          | 140              | 679             | 115             | 3     | 35   | 1000   | 16894      | 1417   |
| 470 – 525                     | 35                        | 89               | 594             | 256             | 20    | 7    | 1000  | 30                          | 128              | 708             | 95              | 11    | 28   | 1000   | 16680      | 1460   |
| 525 – 615                     | 14                        | 121              | 508             | 302             | 50    | 4    | 1000  | 49                          | 120              | 707             | 86              | 9     | 29   | 1000   | 20907      | 1786   |
| 615 – 775                     | 25                        | 74               | 697             | 167             | 26    | 11   | 1000  | 41                          | 132              | 714             | 72              | 10    | 31   | 1000   | 25674      | 2003   |
| 775 – 950                     | 12                        | 114              | 588             | 264             | 18    | 4    | 1000  | 30                          | 121              | 760             | 45              | 11    | 34   | 1000   | 8468       | 660    |
| 950 +                         | 39                        | 89               | 595             | 217             | 45    | 16   | 1000  | 54                          | 131              | 724             | 58              | 9     | 23   | 1000   | 19793      | 1295   |
| all classes                   | 22                        | 81               | 585             | 254             | 44    | 13   | 1000  | 35                          | 118              | 700             | 102             | 10    | 35   | 1000   | 161110     | 12566  |
| estd. no. of aged persons(00) | 1337                      | 4912             | 35394           | 15379           | 2671  | 808  | 60500 | 3547                        | 11884            | 70454           | 10217           | 968   | 3539 | 100610 | X          | X      |
| sample aged persons           | 103                       | 437              | 2383            | 1207            | 218   | 77   | 4425  | 284                         | 1006             | 5513            | 791             | 83    | 464  | 8141   | X          | X      |

Table (18.1): Per 1000 distribution of aged persons with illness or otherwise by their perception about change in state of health for each quintile class and sex

| all-India<br>mpce class       | Rural + Urban             |                 |                 |       |      |       |             |                             |                 |                 |       |      |       |        | Males               |        |
|-------------------------------|---------------------------|-----------------|-----------------|-------|------|-------|-------------|-----------------------------|-----------------|-----------------|-------|------|-------|--------|---------------------|--------|
|                               | aged person with illness  |                 |                 |       |      |       |             | aged person without illness |                 |                 |       |      |       |        | no. of aged persons |        |
|                               | compared to previous year |                 |                 |       |      |       |             | compared to previous year   |                 |                 |       |      |       |        | estd. (00)          | sample |
| much better                   | some-what better          | nearly the same | some-what worse | worse | n.r. | total | much better | some what better            | nearly the same | some what worse | worse | n.r. | total |        |                     |        |
| (1)                           | (2)                       | (3)             | (4)             | (5)   | (6)  | (7)   | (8)         | (9)                         | (10)            | (11)            | (12)  | (13) | (14)  | (15)   | (16)                | (17)   |
| 0 – 225                       | 10                        | 76              | 498             | 312   | 73   | 31    | 1000        | 37                          | 117             | 627             | 119   | 14   | 86    | 1000   | 11232               | 517    |
| 225 – 255                     | 29                        | 103             | 526             | 255   | 22   | 64    | 1000        | 30                          | 57              | 716             | 119   | 24   | 54    | 1000   | 9725                | 385    |
| 255 – 300                     | 27                        | 82              | 457             | 325   | 76   | 33    | 1000        | 37                          | 110             | 675             | 105   | 16   | 56    | 1000   | 24598               | 1076   |
| 300 – 340                     | 3                         | 44              | 554             | 332   | 56   | 10    | 1000        | 27                          | 99              | 664             | 143   | 14   | 52    | 1000   | 25038               | 1320   |
| 340 – 380                     | 7                         | 66              | 560             | 329   | 31   | 7     | 1000        | 27                          | 85              | 690             | 118   | 12   | 67    | 1000   | 25583               | 1260   |
| 380 – 420                     | 52                        | 78              | 480             | 313   | 63   | 14    | 1000        | 40                          | 119             | 677             | 106   | 13   | 45    | 1000   | 29927               | 1539   |
| 420 – 470                     | 32                        | 87              | 493             | 288   | 68   | 32    | 1000        | 27                          | 106             | 713             | 115   | 5    | 34    | 1000   | 34531               | 1891   |
| 470 – 525                     | 17                        | 76              | 500             | 338   | 44   | 27    | 1000        | 31                          | 112             | 674             | 115   | 5    | 63    | 1000   | 35568               | 2008   |
| 525 – 615                     | 18                        | 93              | 512             | 312   | 52   | 12    | 1000        | 60                          | 101             | 692             | 98    | 4    | 44    | 1000   | 41912               | 2386   |
| 615 – 775                     | 23                        | 82              | 589             | 257   | 36   | 12    | 1000        | 35                          | 112             | 699             | 99    | 5    | 50    | 1000   | 46223               | 2607   |
| 775 – 950                     | 30                        | 128             | 529             | 273   | 29   | 11    | 1000        | 43                          | 140             | 727             | 70    | 5    | 14    | 1000   | 19080               | 1160   |
| 950 +                         | 32                        | 105             | 530             | 292   | 39   | 3     | 1000        | 46                          | 152             | 704             | 60    | 7    | 31    | 1000   | 28588               | 1601   |
| all classes                   | 24                        | 86              | 525             | 300   | 48   | 17    | 1000        | 37                          | 110             | 689             | 106   | 9    | 49    | 1000   | 332005              | 17750  |
| estd. no. of aged persons(00) | 2488                      | 8795            | 53801           | 30684 | 4917 | 1724  | 102409      | 8564                        | 25220           | 158205          | 24300 | 2098 | 11207 | 229596 | X                   | X      |
| sample aged persons           | 125                       | 563             | 2691            | 1671  | 340  | 108   | 5498        | 470                         | 1459            | 8137            | 1327  | 137  | 722   | 12252  | X                   | X      |



Table (18.1): Per 1000 distribution of aged persons with illness or otherwise by their perception about change in state of health for each quintile class and sex

| all-India<br>mpce class       | Rural + Urban             |                 |                 |       |      |       |             |                             |                 |                 |       |      |       |        | Females             |        |
|-------------------------------|---------------------------|-----------------|-----------------|-------|------|-------|-------------|-----------------------------|-----------------|-----------------|-------|------|-------|--------|---------------------|--------|
|                               | aged person with illness  |                 |                 |       |      |       |             | aged person without illness |                 |                 |       |      |       |        | no. of aged persons |        |
|                               | compared to previous year |                 |                 |       |      |       |             | compared to previous year   |                 |                 |       |      |       |        | estd. (00)          | sample |
| much better                   | some-what better          | nearly the same | some-what worse | worse | n.r. | total | much better | some what better            | nearly the same | some what worse | worse | n.r. | total |        |                     |        |
| (1)                           | (2)                       | (3)             | (4)             | (5)   | (6)  | (7)   | (8)         | (9)                         | (10)            | (11)            | (12)  | (13) | (14)  | (15)   | (16)                | (17)   |
| 0 – 225                       | 12                        | 50              | 549             | 335   | 50   | 3     | 1000        | 29                          | 135             | 599             | 153   | 12   | 72    | 1000   | 13968               | 585    |
| 225 – 255                     | 0                         | 80              | 517             | 355   | 49   | 0     | 1000        | 27                          | 61              | 620             | 172   | 31   | 89    | 1000   | 10289               | 431    |
| 255 – 300                     | 27                        | 53              | 430             | 366   | 98   | 26    | 1000        | 23                          | 108             | 657             | 144   | 13   | 56    | 1000   | 25546               | 1112   |
| 300 – 340                     | 9                         | 36              | 541             | 295   | 91   | 28    | 1000        | 17                          | 110             | 701             | 120   | 4    | 48    | 1000   | 26626               | 1359   |
| 340 – 380                     | 22                        | 79              | 492             | 310   | 63   | 34    | 1000        | 19                          | 79              | 691             | 135   | 19   | 56    | 1000   | 26683               | 1195   |
| 380 – 420                     | 22                        | 67              | 522             | 278   | 83   | 28    | 1000        | 19                          | 86              | 701             | 118   | 17   | 60    | 1000   | 29338               | 1495   |
| 420 – 470                     | 26                        | 56              | 567             | 255   | 50   | 47    | 1000        | 22                          | 92              | 703             | 121   | 13   | 49    | 1000   | 32949               | 1775   |
| 470 – 525                     | 23                        | 60              | 531             | 303   | 68   | 16    | 1000        | 26                          | 89              | 674             | 154   | 14   | 43    | 1000   | 36068               | 1947   |
| 525 – 615                     | 5                         | 98              | 505             | 315   | 58   | 19    | 1000        | 45                          | 100             | 667             | 141   | 10   | 38    | 1000   | 39323               | 2200   |
| 615 – 775                     | 23                        | 79              | 567             | 281   | 30   | 20    | 1000        | 28                          | 112             | 692             | 123   | 7    | 38    | 1000   | 42144               | 2379   |
| 775 – 950                     | 17                        | 74              | 524             | 342   | 28   | 14    | 1000        | 32                          | 144             | 670             | 120   | 11   | 24    | 1000   | 20281               | 1086   |
| 950 +                         | 17                        | 104             | 550             | 280   | 35   | 14    | 1000        | 34                          | 140             | 667             | 114   | 13   | 32    | 1000   | 28560               | 1517   |
| all classes                   | 18                        | 74              | 530             | 300   | 55   | 22    | 1000        | 27                          | 103             | 677             | 133   | 13   | 48    | 1000   | 331775              | 17081  |
| estd. no. of aged persons(00) | 1875                      | 7659            | 54877           | 31084 | 5738 | 2327  | 103560      | 6127                        | 23589           | 154420          | 30300 | 2868 | 10909 | 228214 | X                   | X      |
| sample aged persons           | 106                       | 444             | 2767            | 1668  | 331  | 126   | 5442        | 335                         | 1219            | 7655            | 1574  | 162  | 694   | 11639  | X                   | X      |

Table (18.1): Per 1000 distribution of aged persons with illness or otherwise by their perception about change in state of health for each quintile class and sex

| mpce class                    | Rural + Urban             |                 |                 |       |       |       |             |                             |                 |                 |       |      |       |        | Persons             |        |
|-------------------------------|---------------------------|-----------------|-----------------|-------|-------|-------|-------------|-----------------------------|-----------------|-----------------|-------|------|-------|--------|---------------------|--------|
|                               | aged person with illness  |                 |                 |       |       |       |             | aged person without illness |                 |                 |       |      |       |        | no. of aged persons |        |
|                               | compared to previous year |                 |                 |       |       |       |             | compared to previous year   |                 |                 |       |      |       |        | estd. (00)          | sample |
| much better                   | some-what better          | nearly the same | some-what worse | worse | n.r.  | total | much better | some what better            | nearly the same | some what worse | worse | n.r. | total |        |                     |        |
| (1)                           | (2)                       | (3)             | (4)             | (5)   | (6)   | (7)   | (8)         | (9)                         | (10)            | (11)            | (12)  | (13) | (14)  | (15)   | (16)                | (17)   |
| 0 – 225                       | 11                        | 64              | 522             | 323   | 62    | 18    | 1000        | 32                          | 127             | 610             | 139   | 13   | 78    | 1000   | 25200               | 1102   |
| 225 – 255                     | 14                        | 91              | 521             | 307   | 36    | 31    | 1000        | 28                          | 59              | 667             | 146   | 27   | 72    | 1000   | 20014               | 816    |
| 255 – 300                     | 27                        | 67              | 444             | 346   | 87    | 30    | 1000        | 30                          | 109             | 666             | 125   | 14   | 56    | 1000   | 50144               | 2188   |
| 300 – 340                     | 6                         | 40              | 546             | 312   | 75    | 20    | 1000        | 22                          | 105             | 683             | 132   | 9    | 50    | 1000   | 51664               | 2679   |
| 340 – 380                     | 15                        | 73              | 523             | 319   | 48    | 22    | 1000        | 23                          | 82              | 691             | 127   | 16   | 61    | 1000   | 52266               | 2455   |
| 380 – 420                     | 37                        | 73              | 501             | 296   | 73    | 21    | 1000        | 30                          | 103             | 688             | 112   | 15   | 52    | 1000   | 59265               | 3034   |
| 420 – 470                     | 29                        | 72              | 528             | 272   | 59    | 39    | 1000        | 25                          | 99              | 708             | 118   | 9    | 41    | 1000   | 67479               | 3666   |
| 470 – 525                     | 20                        | 68              | 515             | 320   | 56    | 21    | 1000        | 29                          | 101             | 674             | 134   | 9    | 53    | 1000   | 71636               | 3955   |
| 525 – 615                     | 12                        | 96              | 509             | 313   | 55    | 16    | 1000        | 53                          | 100             | 680             | 118   | 7    | 41    | 1000   | 81235               | 4586   |
| 615 – 775                     | 23                        | 81              | 579             | 268   | 33    | 16    | 1000        | 31                          | 112             | 695             | 111   | 6    | 44    | 1000   | 88367               | 4986   |
| 775 – 950                     | 23                        | 99              | 527             | 310   | 28    | 13    | 1000        | 38                          | 142             | 698             | 95    | 8    | 19    | 1000   | 39361               | 2246   |
| 950 +                         | 24                        | 104             | 540             | 286   | 37    | 9     | 1000        | 40                          | 146             | 686             | 87    | 10   | 31    | 1000   | 57148               | 3118   |
| all classes                   | 21                        | 80              | 528             | 300   | 52    | 20    | 1000        | 32                          | 107             | 683             | 119   | 11   | 48    | 1000   | 663779              | 34831  |
| estd. no. of aged persons(00) | 4363                      | 16454           | 108677          | 61768 | 10655 | 4051  | 205970      | 14692                       | 48810           | 312625          | 54601 | 4966 | 22117 | 457810 | X                   | X      |
| sample aged persons           | 231                       | 1007            | 5458            | 3339  | 671   | 234   | 10940       | 805                         | 2678            | 15792           | 2901  | 299  | 1416  | 23891  | X                   | X      |

Table (18.2): Per 1000 distribution of aged persons with illness or otherwise by their perception about change in state of health for each sex

| Rural state/ut    | aged person with illness  |                  |                 |                 |       |      |       | aged person without illness |                  |                 |                 |       |      |       | Males no. of aged persons |        |
|-------------------|---------------------------|------------------|-----------------|-----------------|-------|------|-------|-----------------------------|------------------|-----------------|-----------------|-------|------|-------|---------------------------|--------|
|                   | compared to previous year |                  |                 |                 |       |      |       | compared to previous year   |                  |                 |                 |       |      |       | estd. (00)                | sample |
|                   | much better               | some-what better | nearly the same | some-what worse | worse | n.r. | total | much better                 | some what better | nearly the same | some what worse | worse | n.r. | total |                           |        |
| (1)               | (2)                       | (3)              | (4)             | (5)             | (6)   | (7)  | (8)   | (9)                         | (10)             | (11)            | (12)            | (13)  | (14) | (15)  | (16)                      | (17)   |
| Andhra Pradesh    | 9                         | 79               | 511             | 348             | 32    | 20   | 1000  | 27                          | 71               | 801             | 79              | 0     | 22   | 1000  | 18730                     | 697    |
| Arunachal Pradesh | 130                       | 384              | 57              | 174             | 38    | 217  | 1000  | 146                         | 138              | 151             | 31              | 7     | 526  | 1000  | 238                       | 140    |
| Assam             | 7                         | 98               | 496             | 284             | 37    | 78   | 1000  | 42                          | 127              | 613             | 83              | 21    | 115  | 1000  | 6103                      | 471    |
| Bihar             | 55                        | 92               | 401             | 403             | 36    | 13   | 1000  | 50                          | 66               | 681             | 101             | 12    | 90   | 1000  | 18861                     | 912    |
| Chhattisgarh      | 0                         | 230              | 516             | 172             | 82    | 0    | 1000  | 32                          | 221              | 577             | 100             | 12    | 58   | 1000  | 4609                      | 204    |
| Delhi             | -                         | -                | -               | -               | -     | -    | -     | 0                           | 175              | 786             | 40              | 0     | 0    | 1000  | 338                       | 16     |
| Goa               | 0                         | 0                | 121             | 879             | 0     | 0    | 1000  | 139                         | 54               | 593             | 214             | 0     | 0    | 1000  | 506                       | 19     |
| Gujarat           | 55                        | 67               | 634             | 230             | 13    | 0    | 1000  | 19                          | 189              | 700             | 83              | 0     | 9    | 1000  | 10458                     | 351    |
| Haryana           | 0                         | 77               | 390             | 479             | 54    | 0    | 1000  | 15                          | 89               | 741             | 143             | 10    | 2    | 1000  | 5608                      | 252    |
| Himachal Pradesh  | 20                        | 83               | 399             | 486             | 12    | 0    | 1000  | 74                          | 75               | 676             | 143             | 3     | 27   | 1000  | 2400                      | 347    |
| Jammu & Kashmir   | 0                         | 81               | 408             | 362             | 148   | 0    | 1000  | 36                          | 141              | 736             | 53              | 0     | 35   | 1000  | 2246                      | 230    |
| Jharkhand         | 17                        | 85               | 579             | 227             | 40    | 51   | 1000  | 5                           | 54               | 639             | 208             | 37    | 57   | 1000  | 6400                      | 330    |
| Karnataka         | 42                        | 109              | 517             | 313             | 19    | 0    | 1000  | 99                          | 128              | 722             | 39              | 2     | 10   | 1000  | 11642                     | 428    |
| Kerala            | 9                         | 70               | 456             | 363             | 82    | 20   | 1000  | 14                          | 160              | 716             | 111             | 0     | 0    | 1000  | 11673                     | 505    |
| Madhya Pradesh    | 3                         | 79               | 575             | 308             | 35    | 0    | 1000  | 17                          | 85               | 756             | 93              | 11    | 38   | 1000  | 14666                     | 549    |
| Maharashtra       | 19                        | 141              | 515             | 270             | 29    | 26   | 1000  | 66                          | 142              | 674             | 102             | 4     | 11   | 1000  | 23347                     | 717    |
| Manipur           | 97                        | 103              | 66              | 441             | 103   | 189  | 1000  | 69                          | 107              | 436             | 109             | 0     | 279  | 1000  | 395                       | 211    |
| Meghalaya         | 0                         | 194              | 384             | 422             | 0     | 0    | 1000  | 18                          | 130              | 784             | 5               | 12    | 51   | 1000  | 467                       | 96     |
| Mizoram           | 281                       | 0                | 158             | 456             | 0     | 104  | 1000  | 0                           | 201              | 211             | 11              | 17    | 560  | 1000  | 119                       | 89     |
| Nagaland          | 28                        | 248              | 237             | 414             | 0     | 73   | 1000  | 0                           | 34               | 855             | 25              | 0     | 86   | 1000  | 109                       | 56     |
| Orissa            | 36                        | 72               | 462             | 382             | 28    | 20   | 1000  | 51                          | 93               | 667             | 136             | 19    | 33   | 1000  | 13371                     | 525    |
| Punjab            | 0                         | 70               | 583             | 306             | 41    | 0    | 1000  | 32                          | 96               | 772             | 73              | 7     | 20   | 1000  | 6843                      | 258    |
| Rajasthan         | 4                         | 99               | 580             | 244             | 73    | 0    | 1000  | 18                          | 67               | 779             | 117             | 10    | 8    | 1000  | 12196                     | 552    |
| Sikkim            | 0                         | 129              | 343             | 375             | 152   | 0    | 1000  | 92                          | 165              | 704             | 29              | 0     | 11   | 1000  | 115                       | 110    |
| Tamil Nadu        | 55                        | 90               | 662             | 188             | 4     | 1    | 1000  | 68                          | 102              | 735             | 92              | 0     | 2    | 1000  | 16961                     | 571    |
| Tripura           | 0                         | 161              | 674             | 50              | 70    | 45   | 1000  | 29                          | 250              | 540             | 58              | 38    | 85   | 1000  | 927                       | 171    |

Continued

Table (18.2): Per 1000 distribution of aged persons with illness or otherwise by their perception about change in state of health for each sex

| Rural<br>state/ut                | aged person with illness  |                         |                       |                        |       |      |       | aged person without illness |                        |                       |                       |       |      |        | Males<br>no. of aged<br>persons |        |
|----------------------------------|---------------------------|-------------------------|-----------------------|------------------------|-------|------|-------|-----------------------------|------------------------|-----------------------|-----------------------|-------|------|--------|---------------------------------|--------|
|                                  | compared to previous year |                         |                       |                        |       |      |       | compared to previous year   |                        |                       |                       |       |      |        | estd.<br>(00)                   | sample |
|                                  | much<br>better            | some-<br>what<br>better | nearly<br>the<br>same | some-<br>what<br>worse | worse | n.r. | total | much<br>better              | some<br>what<br>better | nearly<br>the<br>same | some<br>what<br>worse | worse | n.r. | total  |                                 |        |
| (1)                              | (2)                       | (3)                     | (4)                   | (5)                    | (6)   | (7)  | (8)   | (9)                         | (10)                   | (11)                  | (12)                  | (13)  | (14) | (15)   | (16)                            | (17)   |
| Uttaranchal                      | 0                         | 39                      | 320                   | 455                    | 185   | 0    | 1000  | 0                           | 53                     | 758                   | 118                   | 0     | 71   | 1000   | 2674                            | 102    |
| Uttar Pradesh                    | 24                        | 72                      | 454                   | 350                    | 65    | 35   | 1000  | 20                          | 102                    | 643                   | 107                   | 14    | 114  | 1000   | 42788                           | 1825   |
| West Bengal                      | 31                        | 74                      | 404                   | 353                    | 112   | 26   | 1000  | 32                          | 137                    | 511                   | 179                   | 15    | 127  | 1000   | 18130                           | 680    |
| A & N Islands                    | 0                         | 188                     | 720                   | 92                     | 0     | 0    | 1000  | 11                          | 292                    | 677                   | 19                    | 0     | 0    | 1000   | 76                              | 34     |
| Chandigarh                       | 0                         | 96                      | 660                   | 151                    | 93    | 0    | 1000  | 0                           | 0                      | 918                   | 82                    | 0     | 0    | 1000   | 7                               | 17     |
| Dadra & N. Haveli                | 0                         | 0                       | 1000                  | 0                      | 0     | 0    | 1000  | 0                           | 0                      | 858                   | 142                   | 0     | 0    | 1000   | 78                              | 20     |
| Daman & Diu                      | 0                         | 0                       | 0                     | 0                      | 0     | 0    | 0     | 0                           | 0                      | 1000                  | 0                     | 0     | 0    | 1000   | 4                               | 7      |
| Lakshadweep                      | 0                         | 89                      | 753                   | 158                    | 0     | 0    | 1000  | 0                           | 0                      | 1000                  | 0                     | 0     | 0    | 1000   | 7                               | 16     |
| Pondicherry                      | 0                         | 20                      | 753                   | 227                    | 0     | 0    | 1000  | 283                         | 0                      | 559                   | 158                   | 0     | 0    | 1000   | 160                             | 20     |
| OENS                             | 30                        | 191                     | 461                   | 194                    | 55    | 69   | 1000  | 46                          | 171                    | 536                   | 49                    | 18    | 181  | 1000   | 2371                            | 873    |
| GUTs                             | 0                         | 58                      | 745                   | 193                    | 3     | 0    | 1000  | 101                         | 71                     | 717                   | 112                   | 0     | 0    | 1000   | 333                             | 114    |
| all-India                        | 24                        | 88                      | 497                   | 322                    | 50    | 19   | 1000  | 37                          | 106                    | 686                   | 108                   | 10    | 53   | 1000   | 253254                          | 11528  |
| estd. no. of aged<br>persons(00) | 1770                      | 6482                    | 36817                 | 23875                  | 3717  | 1408 | 74068 | 6685                        | 19051                  | 122990                | 19280                 | 1732  | 9447 | 179186 | X                               | X      |
| sample aged persons              | 70                        | 336                     | 1576                  | 1109                   | 237   | 73   | 3401  | 313                         | 935                    | 5328                  | 964                   | 94    | 493  | 8127   | X                               | X      |

Table (18.2): Per 1000 distribution of aged persons with illness or otherwise by their perception about change in state of health for each sex

| Rural<br>state/ut | aged person with illness  |                  |                 |                 |       |      |       | aged person without illness |                  |                 |                 |       |      |       | Females<br>no. of aged persons |        |
|-------------------|---------------------------|------------------|-----------------|-----------------|-------|------|-------|-----------------------------|------------------|-----------------|-----------------|-------|------|-------|--------------------------------|--------|
|                   | compared to previous year |                  |                 |                 |       |      |       | compared to previous year   |                  |                 |                 |       |      |       | estd.<br>(00)                  | sample |
|                   | much better               | some-what better | nearly the same | some-what worse | worse | n.r. | total | much better                 | some what better | nearly the same | some what worse | worse | n.r. | total |                                |        |
| (1)               | (2)                       | (3)              | (4)             | (5)             | (6)   | (7)  | (8)   | (9)                         | (10)             | (11)            | (12)            | (13)  | (14) | (15)  | (16)                           | (17)   |
| Andhra Pradesh    | 0                         | 20               | 586             | 336             | 32    | 26   | 1000  | 9                           | 76               | 771             | 117             | 5     | 22   | 1000  | 20035                          | 688    |
| Arunachal Pradesh | 64                        | 277              | 119             | 139             | 30    | 371  | 1000  | 129                         | 109              | 260             | 71              | 10    | 421  | 1000  | 204                            | 118    |
| Assam             | 17                        | 42               | 499             | 266             | 94    | 82   | 1000  | 17                          | 80               | 647             | 113             | 9     | 135  | 1000  | 4273                           | 323    |
| Bihar             | 28                        | 79               | 473             | 248             | 101   | 72   | 1000  | 15                          | 76               | 609             | 147             | 28    | 125  | 1000  | 15258                          | 678    |
| Chhattisgarh      | 0                         | 31               | 589             | 238             | 105   | 38   | 1000  | 24                          | 245              | 558             | 116             | 17    | 40   | 1000  | 6680                           | 290    |
| Delhi             | -                         | -                | -               | -               | -     | -    | -     | 0                           | 272              | 728             | 0               | 0     | 0    | 1000  | 322                            | 17     |
| Goa               | 0                         | 0                | 113             | 865             | 22    | 0    | 1000  | 143                         | 118              | 485             | 254             | 0     | 0    | 1000  | 615                            | 32     |
| Gujarat           | 0                         | 134              | 594             | 252             | 19    | 0    | 1000  | 45                          | 172              | 720             | 59              | 4     | 1    | 1000  | 10401                          | 370    |
| Haryana           | 94                        | 24               | 257             | 562             | 63    | 0    | 1000  | 21                          | 80               | 681             | 206             | 12    | 0    | 1000  | 5510                           | 232    |
| Himachal Pradesh  | 17                        | 70               | 505             | 320             | 76    | 13   | 1000  | 24                          | 69               | 717             | 145             | 6     | 39   | 1000  | 2546                           | 346    |
| Jammu & Kashmir   | 0                         | 18               | 475             | 307             | 198   | 3    | 1000  | 30                          | 116              | 684             | 143             | 20    | 8    | 1000  | 1555                           | 173    |
| Jharkhand         | 0                         | 44               | 705             | 167             | 62    | 22   | 1000  | 7                           | 45               | 607             | 227             | 74    | 39   | 1000  | 4441                           | 231    |
| Karnataka         | 40                        | 133              | 444             | 336             | 46    | 0    | 1000  | 49                          | 89               | 735             | 113             | 2     | 12   | 1000  | 10878                          | 403    |
| Kerala            | 5                         | 61               | 498             | 373             | 55    | 8    | 1000  | 4                           | 110              | 702             | 108             | 21    | 55   | 1000  | 15013                          | 649    |
| Madhya Pradesh    | 0                         | 63               | 624             | 262             | 24    | 26   | 1000  | 12                          | 62               | 740             | 136             | 9     | 41   | 1000  | 14701                          | 544    |
| Maharashtra       | 20                        | 93               | 599             | 199             | 55    | 34   | 1000  | 30                          | 181              | 656             | 114             | 1     | 18   | 1000  | 24333                          | 716    |
| Manipur           | 0                         | 39               | 163             | 629             | 168   | 0    | 1000  | 51                          | 87               | 503             | 157             | 8     | 194  | 1000  | 279                            | 163    |
| Meghalaya         | 0                         | 118              | 416             | 389             | 0     | 76   | 1000  | 38                          | 115              | 712             | 71              | 6     | 60   | 1000  | 431                            | 95     |
| Mizoram           | 0                         | 349              | 313             | 0               | 0     | 338  | 1000  | 128                         | 115              | 235             | 37              | 0     | 485  | 1000  | 76                             | 48     |
| Nagaland          | 0                         | 0                | 659             | 341             | 0     | 0    | 1000  | 0                           | 0                | 623             | 265             | 0     | 112  | 1000  | 39                             | 24     |
| Orissa            | 22                        | 73               | 415             | 399             | 92    | 0    | 1000  | 25                          | 79               | 672             | 180             | 14    | 30   | 1000  | 12157                          | 483    |
| Punjab            | 7                         | 93               | 453             | 387             | 54    | 5    | 1000  | 20                          | 86               | 742             | 133             | 12    | 7    | 1000  | 6518                           | 239    |
| Rajasthan         | 8                         | 53               | 402             | 442             | 96    | 0    | 1000  | 22                          | 70               | 759             | 127             | 22    | 0    | 1000  | 12999                          | 583    |
| Sikkim            | 0                         | 0                | 388             | 612             | 0     | 0    | 1000  | 74                          | 210              | 559             | 57              | 0     | 100  | 1000  | 109                            | 94     |
| Tamil Nadu        | 42                        | 103              | 674             | 171             | 10    | 0    | 1000  | 76                          | 125              | 733             | 59              | 4     | 4    | 1000  | 17146                          | 549    |
| Tripura           | 0                         | 222              | 596             | 54              | 117   | 12   | 1000  | 16                          | 203              | 648             | 77              | 26    | 30   | 1000  | 675                            | 135    |

Continued

Table (18.2): Per 1000 distribution of aged persons with illness or otherwise by their perception about change in state of health for each sex

| Rural<br>state/ut                | aged person with illness  |                         |                       |                        |       |      |       | aged person without illness |                        |                       |                       |       |      |        | Females<br>no. of aged<br>persons |        |
|----------------------------------|---------------------------|-------------------------|-----------------------|------------------------|-------|------|-------|-----------------------------|------------------------|-----------------------|-----------------------|-------|------|--------|-----------------------------------|--------|
|                                  | compared to previous year |                         |                       |                        |       |      |       | compared to previous year   |                        |                       |                       |       |      |        | estd.<br>(00)                     | sample |
|                                  | much<br>better            | some-<br>what<br>better | nearly<br>the<br>same | some-<br>what<br>worse | worse | n.r. | total | much<br>better              | some<br>what<br>better | nearly<br>the<br>same | some<br>what<br>worse | worse | n.r. | total  |                                   |        |
| (1)                              | (2)                       | (3)                     | (4)                   | (5)                    | (6)   | (7)  | (8)   | (9)                         | (10)                   | (11)                  | (12)                  | (13)  | (14) | (15)   | (16)                              | (17)   |
| Uttaranchal                      | 0                         | 301                     | 370                   | 329                    | 0     | 0    | 1000  | 0                           | 67                     | 724                   | 190                   | 7     | 11   | 1000   | 2190                              | 90     |
| Uttar Pradesh                    | 17                        | 78                      | 483                   | 318                    | 63    | 41   | 1000  | 14                          | 75                     | 630                   | 166                   | 10    | 106  | 1000   | 41298                             | 1649   |
| West Bengal                      | 35                        | 42                      | 374                   | 388                    | 113   | 49   | 1000  | 31                          | 81                     | 472                   | 266                   | 23    | 127  | 1000   | 18472                             | 686    |
| A & N Islands                    | 0                         | 0                       | 386                   | 614                    | 0     | 0    | 1000  | 0                           | 155                    | 650                   | 0                     | 0     | 195  | 1000   | 43                                | 15     |
| Chandigarh                       | 0                         | 0                       | 605                   | 282                    | 113   | 0    | 1000  | 0                           | 0                      | 787                   | 213                   | 0     | 0    | 1000   | 8                                 | 11     |
| Dadra & N. Haveli                | 0                         | 0                       | 0                     | 1000                   | 0     | 0    | 1000  | 0                           | 90                     | 865                   | 45                    | 0     | 0    | 1000   | 39                                | 10     |
| Daman & Diu                      | 0                         | 545                     | 455                   | 0                      | 0     | 0    | 1000  | 0                           | 22                     | 978                   | 0                     | 0     | 0    | 1000   | 13                                | 13     |
| Lakshadweep                      | 0                         | 0                       | 807                   | 193                    | 0     | 0    | 1000  | 186                         | 0                      | 814                   | 0                     | 0     | 0    | 1000   | 9                                 | 22     |
| Pondicherry                      | 0                         | 0                       | 852                   | 148                    | 0     | 0    | 1000  | 0                           | 0                      | 802                   | 198                   | 0     | 0    | 1000   | 148                               | 18     |
| OENS                             | 7                         | 184                     | 467                   | 197                    | 78    | 68   | 1000  | 49                          | 140                    | 567                   | 91                    | 12    | 140  | 1000   | 1813                              | 677    |
| GUTs                             | 0                         | 9                       | 784                   | 205                    | 2     | 0    | 1000  | 5                           | 67                     | 794                   | 83                    | 0     | 51   | 1000   | 261                               | 89     |
| all-India                        | 18                        | 71                      | 511                   | 315                    | 60    | 26   | 1000  | 25                          | 100                    | 669                   | 141                   | 13    | 51   | 1000   | 249416                            | 10737  |
| estd. no. of aged<br>persons(00) | 1257                      | 5060                    | 36465                 | 22515                  | 4268  | 1836 | 71401 | 4459                        | 17874                  | 119180                | 25104                 | 2266  | 9131 | 178015 | X                                 | X      |
| sample aged persons              | 58                        | 234                     | 1499                  | 1023                   | 216   | 84   | 3114  | 208                         | 737                    | 4951                  | 1146                  | 122   | 459  | 7623   | X                                 | X      |

Table (18.2): Per 1000 distribution of aged persons with illness or otherwise by their perception about change in state of health for each sex

| Rural<br>state/ut | aged person with illness  |                         |                       |                        |       |      |       | aged person without illness |                        |                       |                       |       |      |       | Persons       |        |
|-------------------|---------------------------|-------------------------|-----------------------|------------------------|-------|------|-------|-----------------------------|------------------------|-----------------------|-----------------------|-------|------|-------|---------------|--------|
|                   | compared to previous year |                         |                       |                        |       |      |       | compared to previous year   |                        |                       |                       |       |      |       | estd.<br>(00) | sample |
|                   | much<br>better            | some-<br>what<br>better | nearly<br>the<br>same | some-<br>what<br>worse | worse | n.r. | total | much<br>better              | some<br>what<br>better | nearly<br>the<br>same | some<br>what<br>worse | worse | n.r. | total |               |        |
| (1)               | (2)                       | (3)                     | (4)                   | (5)                    | (6)   | (7)  | (8)   | (9)                         | (10)                   | (11)                  | (12)                  | (13)  | (14) | (15)  | (16)          | (17)   |
| Andhra Pradesh    | 4                         | 48                      | 551                   | 341                    | 32    | 23   | 1000  | 18                          | 74                     | 785                   | 98                    | 3     | 22   | 1000  | 38765         | 1385   |
| Arunachal Pradesh | 102                       | 339                     | 83                    | 159                    | 35    | 282  | 1000  | 138                         | 124                    | 203                   | 50                    | 8     | 476  | 1000  | 442           | 258    |
| Assam             | 11                        | 74                      | 498                   | 276                    | 62    | 79   | 1000  | 32                          | 108                    | 626                   | 94                    | 16    | 123  | 1000  | 10376         | 794    |
| Bihar             | 44                        | 87                      | 430                   | 340                    | 62    | 37   | 1000  | 34                          | 70                     | 648                   | 122                   | 19    | 106  | 1000  | 34119         | 1590   |
| Chhattisgarh      | 0                         | 118                     | 557                   | 209                    | 95    | 21   | 1000  | 27                          | 235                    | 566                   | 109                   | 15    | 48   | 1000  | 11289         | 494    |
| Delhi             | -                         | -                       | -                     | -                      | -     | -    | -     | 0                           | 222                    | 758                   | 20                    | 0     | 0    | 1000  | 661           | 33     |
| Goa               | 0                         | 0                       | 117                   | 871                    | 12    | 0    | 1000  | 141                         | 90                     | 532                   | 237                   | 0     | 0    | 1000  | 1121          | 51     |
| Gujarat           | 33                        | 94                      | 618                   | 239                    | 15    | 0    | 1000  | 33                          | 180                    | 711                   | 70                    | 2     | 5    | 1000  | 20859         | 721    |
| Haryana           | 43                        | 53                      | 329                   | 517                    | 58    | 0    | 1000  | 18                          | 84                     | 711                   | 175                   | 11    | 1    | 1000  | 11118         | 484    |
| Himachal Pradesh  | 18                        | 77                      | 451                   | 405                    | 43    | 6    | 1000  | 48                          | 72                     | 698                   | 144                   | 5     | 33   | 1000  | 4946          | 693    |
| Jammu & Kashmir   | 0                         | 54                      | 436                   | 339                    | 169   | 1    | 1000  | 33                          | 131                    | 715                   | 89                    | 8     | 24   | 1000  | 3801          | 403    |
| Jharkhand         | 12                        | 72                      | 621                   | 207                    | 48    | 41   | 1000  | 6                           | 50                     | 626                   | 216                   | 53    | 49   | 1000  | 10841         | 561    |
| Karnataka         | 41                        | 119                     | 486                   | 323                    | 31    | 0    | 1000  | 74                          | 108                    | 729                   | 77                    | 2     | 11   | 1000  | 22520         | 831    |
| Kerala            | 7                         | 65                      | 480                   | 369                    | 66    | 13   | 1000  | 8                           | 132                    | 708                   | 109                   | 11    | 31   | 1000  | 26687         | 1154   |
| Madhya Pradesh    | 2                         | 72                      | 598                   | 287                    | 30    | 12   | 1000  | 14                          | 74                     | 748                   | 115                   | 10    | 39   | 1000  | 29367         | 1093   |
| Maharashtra       | 19                        | 117                     | 557                   | 235                    | 42    | 30   | 1000  | 48                          | 162                    | 665                   | 108                   | 2     | 15   | 1000  | 47679         | 1433   |
| Manipur           | 52                        | 74                      | 112                   | 529                    | 133   | 101  | 1000  | 62                          | 99                     | 463                   | 129                   | 3     | 244  | 1000  | 673           | 374    |
| Meghalaya         | 0                         | 156                     | 400                   | 405                    | 0     | 38   | 1000  | 27                          | 123                    | 749                   | 37                    | 9     | 55   | 1000  | 898           | 191    |
| Mizoram           | 161                       | 149                     | 224                   | 262                    | 0     | 204  | 1000  | 49                          | 168                    | 220                   | 21                    | 10    | 532  | 1000  | 196           | 137    |
| Nagaland          | 23                        | 205                     | 310                   | 402                    | 0     | 60   | 1000  | 0                           | 24                     | 788                   | 95                    | 0     | 94   | 1000  | 148           | 80     |
| Orissa            | 29                        | 72                      | 440                   | 390                    | 58    | 11   | 1000  | 38                          | 87                     | 670                   | 157                   | 17    | 32   | 1000  | 25527         | 1008   |
| Punjab            | 4                         | 83                      | 510                   | 352                    | 48    | 3    | 1000  | 27                          | 92                     | 759                   | 100                   | 9     | 14   | 1000  | 13361         | 497    |
| Rajasthan         | 6                         | 78                      | 498                   | 335                    | 83    | 0    | 1000  | 20                          | 69                     | 769                   | 122                   | 16    | 4    | 1000  | 25196         | 1135   |
| Sikkim            | 0                         | 65                      | 365                   | 492                    | 77    | 0    | 1000  | 83                          | 187                    | 634                   | 42                    | 0     | 54   | 1000  | 224           | 204    |
| Tamil Nadu        | 48                        | 96                      | 668                   | 180                    | 7     | 1    | 1000  | 72                          | 114                    | 734                   | 76                    | 2     | 3    | 1000  | 34107         | 1120   |
| Tripura           | 0                         | 189                     | 637                   | 52                     | 92    | 29   | 1000  | 24                          | 231                    | 583                   | 66                    | 33    | 63   | 1000  | 1602          | 306    |

Continued

Table (18.2): Per 1000 distribution of aged persons with illness or otherwise by their perception about change in state of health for each sex

| Rural<br>state/ut                | aged person with illness  |                         |                       |                        |       |      |        | aged person without illness |                        |                       |                       |       |       |        | Persons       |        |
|----------------------------------|---------------------------|-------------------------|-----------------------|------------------------|-------|------|--------|-----------------------------|------------------------|-----------------------|-----------------------|-------|-------|--------|---------------|--------|
|                                  | compared to previous year |                         |                       |                        |       |      |        | compared to previous year   |                        |                       |                       |       |       |        | estd.<br>(00) | sample |
|                                  | much<br>better            | some-<br>what<br>better | nearly<br>the<br>same | some-<br>what<br>worse | worse | n.r. | total  | much<br>better              | some<br>what<br>better | nearly<br>the<br>same | some<br>what<br>worse | worse | n.r.  | total  |               |        |
| (1)                              | (2)                       | (3)                     | (4)                   | (5)                    | (6)   | (7)  | (8)    | (9)                         | (10)                   | (11)                  | (12)                  | (13)  | (14)  | (15)   | (16)          | (17)   |
| Uttaranchal                      | 0                         | 144                     | 340                   | 405                    | 111   | 0    | 1000   | 0                           | 59                     | 743                   | 151                   | 3     | 43    | 1000   | 4865          | 192    |
| Uttar Pradesh                    | 21                        | 75                      | 468                   | 335                    | 64    | 38   | 1000   | 17                          | 89                     | 636                   | 137                   | 12    | 110   | 1000   | 84086         | 3474   |
| West Bengal                      | 33                        | 57                      | 388                   | 371                    | 112   | 38   | 1000   | 32                          | 109                    | 491                   | 222                   | 19    | 127   | 1000   | 36602         | 1366   |
| A & N Islands                    | 0                         | 138                     | 631                   | 231                    | 0     | 0    | 1000   | 7                           | 237                    | 667                   | 12                    | 0     | 77    | 1000   | 120           | 49     |
| Chandigarh                       | 0                         | 55                      | 637                   | 206                    | 102   | 0    | 1000   | 0                           | 0                      | 838                   | 162                   | 0     | 0     | 1000   | 16            | 28     |
| Dadra & N. Haveli                | 0                         | 0                       | 221                   | 779                    | 0     | 0    | 1000   | 0                           | 28                     | 860                   | 112                   | 0     | 0     | 1000   | 117           | 30     |
| Daman & Diu                      | 0                         | 545                     | 455                   | 0                      | 0     | 0    | 1000   | 0                           | 16                     | 984                   | 0                     | 0     | 0     | 1000   | 17            | 20     |
| Lakshadweep                      | 0                         | 30                      | 789                   | 181                    | 0     | 0    | 1000   | 83                          | 0                      | 917                   | 0                     | 0     | 0     | 1000   | 16            | 38     |
| Pondicherry                      | 0                         | 9                       | 808                   | 183                    | 0     | 0    | 1000   | 183                         | 0                      | 645                   | 172                   | 0     | 0     | 1000   | 309           | 38     |
| OENS                             | 19                        | 188                     | 464                   | 195                    | 65    | 68   | 1000   | 47                          | 158                    | 550                   | 67                    | 15    | 163   | 1000   | 4184          | 1550   |
| GUTs                             | 0                         | 32                      | 766                   | 200                    | 3     | 0    | 1000   | 65                          | 69                     | 746                   | 101                   | 0     | 19    | 1000   | 594           | 203    |
| all-India                        | 21                        | 79                      | 504                   | 319                    | 55    | 22   | 1000   | 31                          | 103                    | 678                   | 124                   | 11    | 52    | 1000   | 502670        | 22265  |
| estd. no. of aged<br>persons(00) | 3027                      | 11542                   | 73283                 | 46390                  | 7984  | 3244 | 145469 | 11144                       | 36925                  | 242171                | 44384                 | 3998  | 18578 | 357200 | X             | X      |
| sample aged persons              | 128                       | 570                     | 3075                  | 2132                   | 453   | 157  | 6515   | 521                         | 1672                   | 10279                 | 2110                  | 216   | 952   | 15750  | X             | X      |



Table (18.2): Per 1000 distribution of aged persons with illness or otherwise by their perception about change in state of health for each sex

| Urban<br>state/ut | aged person with illness  |                  |                 |                 |       |      |       | aged person without illness |                  |                 |                 |       |      |       | Males<br>no. of aged persons |        |
|-------------------|---------------------------|------------------|-----------------|-----------------|-------|------|-------|-----------------------------|------------------|-----------------|-----------------|-------|------|-------|------------------------------|--------|
|                   | compared to previous year |                  |                 |                 |       |      |       | compared to previous year   |                  |                 |                 |       |      |       | estd.<br>(00)                | sample |
|                   | much better               | some-what better | nearly the same | some-what worse | worse | n.r. | total | much better                 | some what better | nearly the same | some what worse | worse | n.r. | total |                              |        |
| (1)               | (2)                       | (3)              | (4)             | (5)             | (6)   | (7)  | (8)   | (9)                         | (10)             | (11)            | (12)            | (13)  | (14) | (15)  | (16)                         | (17)   |
| Andhra Pradesh    | 6                         | 62               | 671             | 213             | 35    | 13   | 1000  | 36                          | 66               | 771             | 82              | 0     | 44   | 1000  | 5310                         | 377    |
| Arunachal Pradesh | 0                         | 158              | 526             | 0               | 0     | 316  | 1000  | 17                          | 108              | 264             | 34              | 0     | 577  | 1000  | 10                           | 42     |
| Assam             | 0                         | 108              | 535             | 147             | 128   | 83   | 1000  | 46                          | 146              | 623             | 71              | 11    | 104  | 1000  | 647                          | 109    |
| Bihar             | 14                        | 18               | 641             | 220             | 106   | 0    | 1000  | 19                          | 92               | 548             | 227             | 15    | 99   | 1000  | 2455                         | 169    |
| Chhattisgarh      | 44                        | 71               | 371             | 514             | 0     | 0    | 1000  | 104                         | 82               | 766             | 32              | 16    | 0    | 1000  | 641                          | 63     |
| Delhi             | 14                        | 53               | 809             | 110             | 14    | 0    | 1000  | 2                           | 214              | 711             | 57              | 0     | 16   | 1000  | 2212                         | 211    |
| Goa               | 156                       | 0                | 183             | 661             | 0     | 0    | 1000  | 55                          | 150              | 710             | 85              | 0     | 0    | 1000  | 229                          | 32     |
| Gujarat           | 0                         | 106              | 681             | 196             | 16    | 0    | 1000  | 34                          | 92               | 801             | 71              | 1     | 0    | 1000  | 4592                         | 297    |
| Haryana           | 7                         | 83               | 520             | 329             | 61    | 0    | 1000  | 48                          | 51               | 740             | 151             | 0     | 10   | 1000  | 1315                         | 132    |
| Himachal Pradesh  | 0                         | 0                | 529             | 471             | 0     | 0    | 1000  | 0                           | 38               | 840             | 122             | 0     | 0    | 1000  | 139                          | 49     |
| Jammu & Kashmir   | 22                        | 38               | 497             | 410             | 33    | 0    | 1000  | 11                          | 105              | 768             | 105             | 0     | 11   | 1000  | 408                          | 102    |
| Jharkhand         | 0                         | 226              | 390             | 365             | 20    | 0    | 1000  | 20                          | 178              | 651             | 131             | 8     | 12   | 1000  | 1372                         | 166    |
| Karnataka         | 71                        | 95               | 533             | 253             | 40    | 9    | 1000  | 56                          | 175              | 658             | 91              | 0     | 19   | 1000  | 4025                         | 345    |
| Kerala            | 27                        | 41               | 636             | 213             | 66    | 16   | 1000  | 59                          | 99               | 747             | 76              | 16    | 3    | 1000  | 3986                         | 290    |
| Madhya Pradesh    | 15                        | 77               | 559             | 336             | 13    | 0    | 1000  | 26                          | 132              | 654             | 127             | 14    | 47   | 1000  | 4115                         | 319    |
| Maharashtra       | 21                        | 99               | 615             | 222             | 36    | 6    | 1000  | 36                          | 141              | 686             | 97              | 10    | 30   | 1000  | 12844                        | 596    |
| Manipur           | 0                         | 145              | 226             | 291             | 338   | 0    | 1000  | 23                          | 182              | 472             | 45              | 18    | 259  | 1000  | 192                          | 116    |
| Meghalaya         | 0                         | 448              | 340             | 0               | 0     | 212  | 1000  | 19                          | 217              | 436             | 309             | 10    | 8    | 1000  | 42                           | 34     |
| Mizoram           | 0                         | 75               | 208             | 416             | 0     | 301  | 1000  | 11                          | 59               | 326             | 38              | 0     | 565  | 1000  | 85                           | 142    |
| Nagaland          | 627                       | 0                | 318             | 55              | 0     | 0    | 1000  | 0                           | 0                | 824             | 6               | 0     | 169  | 1000  | 68                           | 24     |
| Orissa            | 65                        | 26               | 508             | 382             | 20    | 0    | 1000  | 2                           | 117              | 589             | 236             | 22    | 34   | 1000  | 1546                         | 148    |
| Punjab            | 135                       | 112              | 419             | 260             | 26    | 48   | 1000  | 10                          | 67               | 900             | 7               | 1     | 15   | 1000  | 2565                         | 165    |
| Rajasthan         | 38                        | 22               | 538             | 377             | 24    | 0    | 1000  | 31                          | 45               | 811             | 110             | 2     | 2    | 1000  | 3012                         | 271    |
| Sikkim            | 0                         | 0                | 556             | 444             | 0     | 0    | 1000  | 207                         | 213              | 580             | 0               | 0     | 0    | 1000  | 11                           | 16     |
| Tamil Nadu        | 40                        | 117              | 682             | 152             | 9     | 0    | 1000  | 98                          | 166              | 697             | 37              | 2     | 0    | 1000  | 7955                         | 587    |
| Tripura           | 64                        | 369              | 474             | 68              | 25    | 0    | 1000  | 40                          | 222              | 581             | 109             | 0     | 49   | 1000  | 130                          | 45     |

Continued

Table (18.2): Per 1000 distribution of aged persons with illness or otherwise by their perception about change in state of health for each sex

| Urban<br>state/ut                | aged person with illness  |                         |                       |                        |       |      |       | aged person without illness |                        |                       |                       |       |      |       | Males<br>no. of aged<br>persons |        |
|----------------------------------|---------------------------|-------------------------|-----------------------|------------------------|-------|------|-------|-----------------------------|------------------------|-----------------------|-----------------------|-------|------|-------|---------------------------------|--------|
|                                  | compared to previous year |                         |                       |                        |       |      |       | compared to previous year   |                        |                       |                       |       |      |       | estd.<br>(00)                   | sample |
|                                  | much<br>better            | some-<br>what<br>better | nearly<br>the<br>same | some-<br>what<br>worse | worse | n.r. | total | much<br>better              | some<br>what<br>better | nearly<br>the<br>same | some<br>what<br>worse | worse | n.r. | total |                                 |        |
| (1)                              | (2)                       | (3)                     | (4)                   | (5)                    | (6)   | (7)  | (8)   | (9)                         | (10)                   | (11)                  | (12)                  | (13)  | (14) | (15)  | (16)                            | (17)   |
| Uttaranchal                      | 0                         | 57                      | 554                   | 254                    | 135   | 0    | 1000  | 43                          | 88                     | 846                   | 6                     | 17    | 0    | 1000  | 558                             | 49     |
| Uttar Pradesh                    | 33                        | 64                      | 498                   | 341                    | 40    | 24   | 1000  | 18                          | 69                     | 681                   | 153                   | 12    | 67   | 1000  | 9104                            | 620    |
| West Bengal                      | 12                        | 79                      | 601                   | 212                    | 78    | 17   | 1000  | 27                          | 172                    | 626                   | 92                    | 6     | 76   | 1000  | 8725                            | 522    |
| A & N Islands                    | 0                         | 535                     | 208                   | 257                    | 0     | 0    | 1000  | 0                           | 53                     | 881                   | 21                    | 0     | 45   | 1000  | 18                              | 18     |
| Chandigarh                       | 0                         | 211                     | 724                   | 65                     | 0     | 0    | 1000  | 0                           | 43                     | 911                   | 46                    | 0     | 0    | 1000  | 197                             | 69     |
| Dadra & N. Haveli                | 0                         | 0                       | 1000                  | 0                      | 0     | 0    | 1000  | 0                           | 0                      | 981                   | 19                    | 0     | 0    | 1000  | 4                               | 13     |
| Daman & Diu                      | 0                         | 0                       | 911                   | 89                     | 0     | 0    | 1000  | 0                           | 0                      | 916                   | 84                    | 0     | 0    | 1000  | 10                              | 16     |
| Lakshadweep                      | 0                         | 512                     | 177                   | 71                     | 240   | 0    | 1000  | 0                           | 221                    | 649                   | 130                   | 0     | 0    | 1000  | 8                               | 21     |
| Pondicherry                      | 0                         | 101                     | 691                   | 208                    | 0     | 0    | 1000  | 0                           | 274                    | 726                   | 0                     | 0     | 0    | 1000  | 218                             | 47     |
| OENS                             | 173                       | 223                     | 374                   | 134                    | 47    | 49   | 1000  | 26                          | 152                    | 504                   | 74                    | 8     | 236  | 1000  | 538                             | 419    |
| GUTs                             | 0                         | 146                     | 671                   | 177                    | 5     | 0    | 1000  | 0                           | 118                    | 848                   | 32                    | 0     | 2    | 1000  | 455                             | 184    |
| all-India                        | 25                        | 82                      | 599                   | 240                    | 42    | 11   | 1000  | 37                          | 122                    | 699                   | 100                   | 7     | 35   | 1000  | 78751                           | 6222   |
| estd. no. of aged<br>persons(00) | 719                       | 2313                    | 16983                 | 6809                   | 1201  | 316  | 28341 | 1879                        | 6169                   | 35215                 | 5020                  | 366   | 1760 | 50410 | X                               | X      |
| sample aged persons              | 55                        | 227                     | 1115                  | 562                    | 103   | 35   | 2097  | 157                         | 524                    | 2809                  | 363                   | 43    | 229  | 4125  | X                               | X      |

Table (18.2): Per 1000 distribution of aged persons with illness or otherwise by their perception about change in state of health for each sex

| Urban<br>state/ut | aged person with illness  |                  |                 |                 |       |      |       | aged person without illness |                  |                 |                 |       |      |       | no. of aged persons |        |
|-------------------|---------------------------|------------------|-----------------|-----------------|-------|------|-------|-----------------------------|------------------|-----------------|-----------------|-------|------|-------|---------------------|--------|
|                   | compared to previous year |                  |                 |                 |       |      |       | compared to previous year   |                  |                 |                 |       |      |       | estd.<br>(00)       | sample |
|                   | much better               | some-what better | nearly the same | some-what worse | worse | n.r. | total | much better                 | some what better | nearly the same | some what worse | worse | n.r. | total |                     |        |
| (1)               | (2)                       | (3)              | (4)             | (5)             | (6)   | (7)  | (8)   | (9)                         | (10)             | (11)            | (12)            | (13)  | (14) | (15)  | (16)                | (17)   |
| Andhra Pradesh    | 6                         | 42               | 690             | 211             | 35    | 16   | 1000  | 8                           | 93               | 736             | 119             | 15    | 29   | 1000  | 6160                | 421    |
| Arunachal Pradesh | 129                       | 473              | 215             | 54              | 0     | 129  | 1000  | 69                          | 11               | 342             | 0               | 0     | 578  | 1000  | 7                   | 30     |
| Assam             | 0                         | 59               | 421             | 366             | 131   | 24   | 1000  | 23                          | 80               | 628             | 134             | 0     | 134  | 1000  | 532                 | 85     |
| Bihar             | 0                         | 89               | 507             | 339             | 51    | 14   | 1000  | 8                           | 59               | 753             | 40              | 50    | 89   | 1000  | 1829                | 145    |
| Chhattisgarh      | 49                        | 143              | 394             | 197             | 217   | 0    | 1000  | 110                         | 209              | 497             | 167             | 18    | 0    | 1000  | 760                 | 88     |
| Delhi             | 0                         | 27               | 813             | 150             | 0     | 10   | 1000  | 16                          | 149              | 736             | 85              | 0     | 13   | 1000  | 2129                | 207    |
| Goa               | 0                         | 0                | 672             | 319             | 8     | 0    | 1000  | 41                          | 27               | 796             | 136             | 0     | 0    | 1000  | 256                 | 40     |
| Gujarat           | 12                        | 48               | 655             | 267             | 18    | 0    | 1000  | 20                          | 141              | 722             | 95              | 9     | 12   | 1000  | 5101                | 319    |
| Haryana           | 0                         | 46               | 395             | 438             | 120   | 0    | 1000  | 24                          | 45               | 690             | 185             | 13    | 43   | 1000  | 1725                | 143    |
| Himachal Pradesh  | 0                         | 224              | 564             | 180             | 0     | 31   | 1000  | 0                           | 62               | 809             | 129             | 0     | 0    | 1000  | 155                 | 50     |
| Jammu & Kashmir   | 0                         | 60               | 687             | 235             | 0     | 17   | 1000  | 9                           | 107              | 778             | 97              | 0     | 10   | 1000  | 336                 | 91     |
| Jharkhand         | 0                         | 53               | 673             | 191             | 37    | 46   | 1000  | 28                          | 51               | 729             | 150             | 14    | 28   | 1000  | 1292                | 139    |
| Karnataka         | 57                        | 88               | 599             | 210             | 45    | 0    | 1000  | 90                          | 137              | 659             | 88              | 19    | 7    | 1000  | 4073                | 353    |
| Kerala            | 10                        | 46               | 600             | 296             | 49    | 0    | 1000  | 6                           | 90               | 773             | 76              | 0     | 55   | 1000  | 4686                | 322    |
| Madhya Pradesh    | 17                        | 104              | 418             | 344             | 97    | 21   | 1000  | 20                          | 174              | 606             | 132             | 13    | 54   | 1000  | 4466                | 327    |
| Maharashtra       | 25                        | 112              | 601             | 211             | 37    | 15   | 1000  | 40                          | 115              | 727             | 90              | 10    | 18   | 1000  | 13669               | 672    |
| Manipur           | 0                         | 10               | 326             | 425             | 104   | 136  | 1000  | 27                          | 99               | 454             | 75              | 4     | 341  | 1000  | 178                 | 115    |
| Meghalaya         | 0                         | 191              | 286             | 523             | 0     | 0    | 1000  | 27                          | 76               | 818             | 38              | 0     | 41   | 1000  | 48                  | 46     |
| Mizoram           | 0                         | 0                | 92              | 479             | 0     | 429  | 1000  | 7                           | 79               | 382             | 71              | 0     | 462  | 1000  | 60                  | 104    |
| Nagaland          | 0                         | 0                | 0               | 0               | 0     | 0    | 0     | 368                         | 0                | 632             | 0               | 0     | 0    | 1000  | 8                   | 5      |
| Orissa            | 0                         | 46               | 743             | 156             | 55    | 0    | 1000  | 16                          | 74               | 679             | 121             | 6     | 105  | 1000  | 1182                | 113    |
| Punjab            | 49                        | 202              | 472             | 228             | 49    | 0    | 1000  | 62                          | 64               | 789             | 69              | 0     | 16   | 1000  | 2347                | 164    |
| Rajasthan         | 8                         | 51               | 528             | 302             | 109   | 0    | 1000  | 39                          | 48               | 770             | 137             | 7     | 0    | 1000  | 3076                | 266    |
| Sikkim            | 0                         | 0                | 481             | 519             | 0     | 0    | 1000  | 461                         | 276              | 263             | 0               | 0     | 0    | 1000  | 7                   | 13     |
| Tamil Nadu        | 15                        | 87               | 670             | 211             | 17    | 0    | 1000  | 72                          | 164              | 713             | 50              | 0     | 1    | 1000  | 8984                | 650    |
| Tripura           | 64                        | 217              | 562             | 0               | 157   | 0    | 1000  | 11                          | 328              | 449             | 89              | 24    | 100  | 1000  | 136                 | 54     |

Continued

Table (18.2): Per 1000 distribution of aged persons with illness or otherwise by their perception about change in state of health for each sex

| Urban<br>state/ut                | aged person with illness  |                         |                       |                        |       |      |       | aged person without illness |                        |                       |                       |       |      |       | Females<br>no. of aged<br>persons |        |
|----------------------------------|---------------------------|-------------------------|-----------------------|------------------------|-------|------|-------|-----------------------------|------------------------|-----------------------|-----------------------|-------|------|-------|-----------------------------------|--------|
|                                  | compared to previous year |                         |                       |                        |       |      |       | compared to previous year   |                        |                       |                       |       |      |       | estd.<br>(00)                     | sample |
|                                  | much<br>better            | some-<br>what<br>better | nearly<br>the<br>same | some-<br>what<br>worse | worse | n.r. | total | much<br>better              | some<br>what<br>better | nearly<br>the<br>same | some<br>what<br>worse | worse | n.r. | total |                                   |        |
| (1)                              | (2)                       | (3)                     | (4)                   | (5)                    | (6)   | (7)  | (8)   | (9)                         | (10)                   | (11)                  | (12)                  | (13)  | (14) | (15)  | (16)                              | (17)   |
| Uttaranchal                      | 0                         | 0                       | 664                   | 220                    | 116   | 0    | 1000  | 0                           | 42                     | 838                   | 71                    | 11    | 38   | 1000  | 693                               | 49     |
| Uttar Pradesh                    | 22                        | 55                      | 450                   | 381                    | 45    | 46   | 1000  | 15                          | 86                     | 642                   | 167                   | 11    | 79   | 1000  | 9590                              | 621    |
| West Bengal                      | 25                        | 102                     | 483                   | 311                    | 52    | 27   | 1000  | 14                          | 128                    | 675                   | 85                    | 40    | 59   | 1000  | 8315                              | 506    |
| A & N Islands                    | 0                         | 375                     | 346                   | 279                    | 0     | 0    | 1000  | 0                           | 309                    | 504                   | 120                   | 0     | 67   | 1000  | 15                                | 22     |
| Chandigarh                       | 0                         | 0                       | 671                   | 315                    | 14    | 0    | 1000  | 0                           | 0                      | 942                   | 11                    | 31    | 16   | 1000  | 147                               | 68     |
| Dadra & N. Haveli                | 0                         | 0                       | 1000                  | 0                      | 0     | 0    | 1000  | 0                           | 0                      | 916                   | 84                    | 0     | 0    | 1000  | 3                                 | 14     |
| Daman & Diu                      | 0                         | 0                       | 1000                  | 0                      | 0     | 0    | 1000  | 13                          | 35                     | 863                   | 44                    | 0     | 44   | 1000  | 16                                | 22     |
| Lakshadweep                      | 0                         | 479                     | 253                   | 268                    | 0     | 0    | 1000  | 0                           | 81                     | 919                   | 0                     | 0     | 0    | 1000  | 10                                | 24     |
| Pondicherry                      | 0                         | 117                     | 668                   | 129                    | 86    | 0    | 1000  | 0                           | 130                    | 811                   | 59                    | 0     | 0    | 1000  | 368                               | 56     |
| OENS                             | 28                        | 131                     | 383                   | 278                    | 88    | 92   | 1000  | 33                          | 161                    | 477                   | 72                    | 8     | 250  | 1000  | 444                               | 367    |
| GUTs                             | 0                         | 105                     | 659                   | 164                    | 72    | 0    | 1000  | 1                           | 82                     | 851                   | 42                    | 12    | 12   | 1000  | 560                               | 206    |
| all-India                        | 19                        | 81                      | 572                   | 266                    | 46    | 15   | 1000  | 33                          | 114                    | 702                   | 104                   | 12    | 35   | 1000  | 82359                             | 6344   |
| estd. no. of aged<br>persons(00) | 618                       | 2600                    | 18411                 | 8569                   | 1470  | 491  | 32159 | 1668                        | 5715                   | 35239                 | 5196                  | 602   | 1778 | 50200 | X                                 | X      |
| sample aged persons              | 48                        | 210                     | 1268                  | 645                    | 115   | 42   | 2328  | 127                         | 482                    | 2704                  | 428                   | 40    | 235  | 4016  | X                                 | X      |

Table (18.2): Per 1000 distribution of aged persons with illness or otherwise by their perception about change in state of health for each sex

| Urban<br>state/ut | aged person with illness  |                         |                       |                        |       |      |       | aged person without illness |                        |                       |                       |       |      |       | Persons       |        |
|-------------------|---------------------------|-------------------------|-----------------------|------------------------|-------|------|-------|-----------------------------|------------------------|-----------------------|-----------------------|-------|------|-------|---------------|--------|
|                   | compared to previous year |                         |                       |                        |       |      |       | compared to previous year   |                        |                       |                       |       |      |       | estd.<br>(00) | sample |
|                   | much<br>better            | some-<br>what<br>better | nearly<br>the<br>same | some-<br>what<br>worse | worse | n.r. | total | much<br>better              | some<br>what<br>better | nearly<br>the<br>same | some<br>what<br>worse | worse | n.r. | total |               |        |
| (1)               | (2)                       | (3)                     | (4)                   | (5)                    | (6)   | (7)  | (8)   | (9)                         | (10)                   | (11)                  | (12)                  | (13)  | (14) | (15)  | (16)          | (17)   |
| Andhra Pradesh    | 6                         | 51                      | 681                   | 212                    | 35    | 15   | 1000  | 22                          | 80                     | 753                   | 101                   | 8     | 36   | 1000  | 11470         | 798    |
| Arunachal Pradesh | 92                        | 382                     | 305                   | 38                     | 0     | 183  | 1000  | 36                          | 72                     | 293                   | 21                    | 0     | 577  | 1000  | 17            | 72     |
| Assam             | 0                         | 88                      | 489                   | 234                    | 129   | 60   | 1000  | 35                          | 115                    | 625                   | 101                   | 6     | 118  | 1000  | 1180          | 194    |
| Bihar             | 8                         | 49                      | 583                   | 271                    | 82    | 6    | 1000  | 15                          | 78                     | 635                   | 148                   | 30    | 95   | 1000  | 4283          | 314    |
| Chhattisgarh      | 46                        | 106                     | 382                   | 361                    | 105   | 0    | 1000  | 107                         | 154                    | 615                   | 108                   | 17    | 0    | 1000  | 1401          | 151    |
| Delhi             | 7                         | 40                      | 811                   | 131                    | 7     | 5    | 1000  | 9                           | 183                    | 723                   | 71                    | 0     | 15   | 1000  | 4342          | 418    |
| Goa               | 40                        | 0                       | 546                   | 407                    | 6     | 0    | 1000  | 49                          | 96                     | 747                   | 107                   | 0     | 0    | 1000  | 485           | 72     |
| Gujarat           | 5                         | 79                      | 669                   | 229                    | 17    | 0    | 1000  | 26                          | 120                    | 757                   | 85                    | 6     | 7    | 1000  | 9693          | 616    |
| Haryana           | 3                         | 64                      | 457                   | 385                    | 91    | 0    | 1000  | 34                          | 47                     | 711                   | 171                   | 8     | 30   | 1000  | 3040          | 275    |
| Himachal Pradesh  | 0                         | 117                     | 548                   | 319                    | 0     | 16   | 1000  | 0                           | 50                     | 824                   | 126                   | 0     | 0    | 1000  | 294           | 99     |
| Jammu & Kashmir   | 13                        | 47                      | 574                   | 340                    | 20    | 7    | 1000  | 10                          | 106                    | 773                   | 101                   | 0     | 11   | 1000  | 744           | 193    |
| Jharkhand         | 0                         | 167                     | 487                   | 305                    | 26    | 16   | 1000  | 24                          | 113                    | 691                   | 141                   | 11    | 20   | 1000  | 2664          | 305    |
| Karnataka         | 63                        | 91                      | 570                   | 229                    | 43    | 4    | 1000  | 72                          | 157                    | 659                   | 90                    | 9     | 13   | 1000  | 8098          | 698    |
| Kerala            | 17                        | 44                      | 616                   | 260                    | 56    | 7    | 1000  | 32                          | 95                     | 760                   | 76                    | 8     | 29   | 1000  | 8672          | 612    |
| Madhya Pradesh    | 16                        | 91                      | 485                   | 340                    | 57    | 11   | 1000  | 23                          | 154                    | 629                   | 130                   | 14    | 50   | 1000  | 8580          | 646    |
| Maharashtra       | 23                        | 106                     | 608                   | 216                    | 37    | 11   | 1000  | 38                          | 128                    | 706                   | 94                    | 10    | 24   | 1000  | 26513         | 1268   |
| Manipur           | 0                         | 55                      | 292                   | 380                    | 182   | 90   | 1000  | 25                          | 143                    | 463                   | 59                    | 11    | 298  | 1000  | 369           | 231    |
| Meghalaya         | 0                         | 238                     | 296                   | 427                    | 0     | 39   | 1000  | 22                          | 149                    | 620                   | 178                   | 5     | 24   | 1000  | 90            | 80     |
| Mizoram           | 0                         | 44                      | 159                   | 443                    | 0     | 355  | 1000  | 9                           | 67                     | 350                   | 52                    | 0     | 522  | 1000  | 145           | 246    |
| Nagaland          | 627                       | 0                       | 318                   | 55                     | 0     | 0    | 1000  | 48                          | 0                      | 799                   | 5                     | 0     | 147  | 1000  | 76            | 29     |
| Orissa            | 31                        | 36                      | 629                   | 266                    | 38    | 0    | 1000  | 8                           | 99                     | 626                   | 188                   | 15    | 64   | 1000  | 2729          | 261    |
| Punjab            | 91                        | 158                     | 446                   | 244                    | 38    | 24   | 1000  | 34                          | 66                     | 849                   | 36                    | 1     | 15   | 1000  | 4912          | 329    |
| Rajasthan         | 24                        | 36                      | 534                   | 342                    | 65    | 0    | 1000  | 35                          | 46                     | 790                   | 124                   | 4     | 1    | 1000  | 6088          | 537    |
| Sikkim            | 0                         | 0                       | 492                   | 508                    | 0     | 0    | 1000  | 292                         | 235                    | 473                   | 0                     | 0     | 0    | 1000  | 18            | 29     |
| Tamil Nadu        | 26                        | 100                     | 675                   | 185                    | 13    | 0    | 1000  | 85                          | 165                    | 705                   | 44                    | 1     | 0    | 1000  | 16939         | 1237   |
| Tripura           | 64                        | 312                     | 507                   | 42                     | 75    | 0    | 1000  | 24                          | 280                    | 508                   | 98                    | 13    | 77   | 1000  | 267           | 99     |

Continued

Table (18.2): Per 1000 distribution of aged persons with illness or otherwise by their perception about change in state of health for each sex

| Urban<br>state/ut                | aged person with illness  |                         |                       |                        |       |      |       | aged person without illness |                        |                       |                       |       |      |        | Persons       |        |
|----------------------------------|---------------------------|-------------------------|-----------------------|------------------------|-------|------|-------|-----------------------------|------------------------|-----------------------|-----------------------|-------|------|--------|---------------|--------|
|                                  | compared to previous year |                         |                       |                        |       |      |       | compared to previous year   |                        |                       |                       |       |      |        | estd.<br>(00) | sample |
|                                  | much<br>better            | some-<br>what<br>better | nearly<br>the<br>same | some-<br>what<br>worse | worse | n.r. | total | much<br>better              | some<br>what<br>better | nearly<br>the<br>same | some<br>what<br>worse | worse | n.r. | total  |               |        |
| (1)                              | (2)                       | (3)                     | (4)                   | (5)                    | (6)   | (7)  | (8)   | (9)                         | (10)                   | (11)                  | (12)                  | (13)  | (14) | (15)   | (16)          | (17)   |
| Uttaranchal                      | 0                         | 36                      | 594                   | 242                    | 128   | 0    | 1000  | 17                          | 60                     | 841                   | 46                    | 13    | 23   | 1000   | 1252          | 98     |
| Uttar Pradesh                    | 27                        | 59                      | 471                   | 364                    | 43    | 37   | 1000  | 17                          | 77                     | 662                   | 160                   | 11    | 73   | 1000   | 18694         | 1241   |
| West Bengal                      | 18                        | 91                      | 540                   | 263                    | 65    | 22   | 1000  | 21                          | 152                    | 648                   | 89                    | 22    | 68   | 1000   | 17040         | 1028   |
| A & N Islands                    | 0                         | 494                     | 243                   | 263                    | 0     | 0    | 1000  | 0                           | 187                    | 683                   | 73                    | 0     | 57   | 1000   | 33            | 40     |
| Chandigarh                       | 0                         | 84                      | 692                   | 215                    | 9     | 0    | 1000  | 0                           | 27                     | 922                   | 33                    | 11    | 6    | 1000   | 344           | 137    |
| Dadra & N. Haveli                | 0                         | 0                       | 1000                  | 0                      | 0     | 0    | 1000  | 0                           | 0                      | 951                   | 49                    | 0     | 0    | 1000   | 7             | 27     |
| Daman & Diu                      | 0                         | 0                       | 939                   | 61                     | 0     | 0    | 1000  | 9                           | 23                     | 881                   | 58                    | 0     | 29   | 1000   | 26            | 38     |
| Lakshadweep                      | 0                         | 492                     | 222                   | 189                    | 96    | 0    | 1000  | 0                           | 150                    | 787                   | 64                    | 0     | 0    | 1000   | 19            | 45     |
| Pondicherry                      | 0                         | 111                     | 676                   | 156                    | 57    | 0    | 1000  | 0                           | 192                    | 774                   | 34                    | 0     | 0    | 1000   | 586           | 103    |
| OENS                             | 109                       | 182                     | 378                   | 197                    | 65    | 68   | 1000  | 29                          | 156                    | 492                   | 73                    | 8     | 242  | 1000   | 983           | 786    |
| GUTs                             | 0                         | 120                     | 664                   | 169                    | 48    | 0    | 1000  | 0                           | 101                    | 850                   | 37                    | 6     | 7    | 1000   | 1015          | 390    |
| all-India                        | 22                        | 81                      | 585                   | 254                    | 44    | 13   | 1000  | 35                          | 118                    | 700                   | 102                   | 10    | 35   | 1000   | 161110        | 12566  |
| estd. no. of aged<br>persons(00) | 1337                      | 4912                    | 35394                 | 15379                  | 2671  | 808  | 60500 | 3547                        | 11884                  | 70454                 | 10217                 | 968   | 3539 | 100610 | X             | X      |
| sample aged persons              | 103                       | 437                     | 2383                  | 1207                   | 218   | 77   | 4425  | 284                         | 1006                   | 5513                  | 791                   | 83    | 464  | 8141   | X             | X      |

Table (18.2): Per 1000 distribution of aged persons with illness or otherwise by their perception about change in state of health for each sex

| Rural + Urban     |                           |                  |                 |                 |       |      |       |                             |                  |                 |                 |       |      |       | Males               |        |
|-------------------|---------------------------|------------------|-----------------|-----------------|-------|------|-------|-----------------------------|------------------|-----------------|-----------------|-------|------|-------|---------------------|--------|
| state/ut          | aged person with illness  |                  |                 |                 |       |      |       | aged person without illness |                  |                 |                 |       |      |       | no. of aged persons |        |
|                   | compared to previous year |                  |                 |                 |       |      |       | compared to previous year   |                  |                 |                 |       |      |       | estd. (00)          | sample |
|                   | much better               | some-what better | nearly the same | some-what worse | worse | n.r. | total | much better                 | some what better | nearly the same | some what worse | worse | n.r. | total |                     |        |
| (1)               | (2)                       | (3)              | (4)             | (5)             | (6)   | (7)  | (8)   | (9)                         | (10)             | (11)            | (12)            | (13)  | (14) | (15)  | (16)                | (17)   |
| Andhra Pradesh    | 8                         | 74               | 559             | 307             | 33    | 18   | 1000  | 28                          | 70               | 796             | 80              | 0     | 26   | 1000  | 24041               | 1074   |
| Arunachal Pradesh | 129                       | 381              | 62              | 172             | 37    | 218  | 1000  | 139                         | 137              | 157             | 31              | 6     | 529  | 1000  | 248                 | 182    |
| Assam             | 6                         | 99               | 500             | 270             | 46    | 78   | 1000  | 42                          | 129              | 614             | 82              | 20    | 114  | 1000  | 6750                | 580    |
| Bihar             | 49                        | 81               | 437             | 376             | 46    | 11   | 1000  | 47                          | 69               | 667             | 115             | 12    | 91   | 1000  | 21316               | 1081   |
| Chhattisgarh      | 9                         | 198              | 487             | 240             | 66    | 0    | 1000  | 40                          | 207              | 597             | 93              | 12    | 52   | 1000  | 5250                | 267    |
| Delhi             | 14                        | 53               | 809             | 110             | 14    | 0    | 1000  | 2                           | 208              | 722             | 55              | 0     | 13   | 1000  | 2551                | 227    |
| Goa               | 16                        | 0                | 127             | 857             | 0     | 0    | 1000  | 96                          | 104              | 654             | 147             | 0     | 0    | 1000  | 735                 | 51     |
| Gujarat           | 38                        | 79               | 649             | 220             | 14    | 0    | 1000  | 23                          | 160              | 731             | 79              | 0     | 6    | 1000  | 15050               | 648    |
| Haryana           | 2                         | 78               | 421             | 444             | 56    | 0    | 1000  | 21                          | 82               | 741             | 144             | 8     | 3    | 1000  | 6923                | 384    |
| Himachal Pradesh  | 18                        | 78               | 407             | 485             | 11    | 0    | 1000  | 70                          | 73               | 685             | 142             | 3     | 26   | 1000  | 2539                | 396    |
| Jammu & Kashmir   | 4                         | 74               | 423             | 371             | 128   | 0    | 1000  | 32                          | 136              | 741             | 60              | 0     | 31   | 1000  | 2654                | 332    |
| Jharkhand         | 12                        | 129              | 520             | 270             | 34    | 35   | 1000  | 7                           | 74               | 640             | 196             | 33    | 50   | 1000  | 7772                | 496    |
| Karnataka         | 49                        | 105              | 520             | 300             | 24    | 2    | 1000  | 87                          | 141              | 705             | 53              | 1     | 13   | 1000  | 15667               | 773    |
| Kerala            | 13                        | 63               | 499             | 327             | 78    | 19   | 1000  | 26                          | 143              | 724             | 101             | 5     | 1    | 1000  | 15659               | 795    |
| Madhya Pradesh    | 6                         | 78               | 571             | 315             | 30    | 0    | 1000  | 19                          | 95               | 734             | 100             | 12    | 40   | 1000  | 18781               | 868    |
| Maharashtra       | 19                        | 124              | 557             | 250             | 32    | 18   | 1000  | 57                          | 142              | 678             | 100             | 6     | 17   | 1000  | 36191               | 1313   |
| Manipur           | 76                        | 112              | 101             | 409             | 154   | 148  | 1000  | 54                          | 132              | 448             | 88              | 6     | 272  | 1000  | 587                 | 327    |
| Meghalaya         | 0                         | 202              | 383             | 410             | 0     | 6    | 1000  | 18                          | 138              | 751             | 34              | 12    | 47   | 1000  | 510                 | 130    |
| Mizoram           | 144                       | 37               | 182             | 437             | 0     | 200  | 1000  | 4                           | 144              | 258             | 22              | 10    | 562  | 1000  | 204                 | 231    |
| Nagaland          | 261                       | 152              | 269             | 275             | 0     | 44   | 1000  | 0                           | 21               | 843             | 18              | 0     | 118  | 1000  | 178                 | 80     |
| Orissa            | 39                        | 68               | 466             | 382             | 27    | 18   | 1000  | 46                          | 96               | 659             | 147             | 20    | 33   | 1000  | 14917               | 673    |
| Punjab            | 35                        | 81               | 540             | 294             | 37    | 13   | 1000  | 26                          | 88               | 808             | 55              | 5     | 18   | 1000  | 9408                | 423    |
| Rajasthan         | 14                        | 76               | 567             | 284             | 58    | 0    | 1000  | 20                          | 63               | 785             | 116             | 9     | 7    | 1000  | 15208               | 823    |
| Sikkim            | 0                         | 128              | 346             | 376             | 150   | 0    | 1000  | 103                         | 170              | 692             | 26              | 0     | 10   | 1000  | 126                 | 126    |
| Tamil Nadu        | 50                        | 99               | 669             | 176             | 6     | 1    | 1000  | 77                          | 122              | 723             | 75              | 1     | 1    | 1000  | 24916               | 1158   |
| Tripura           | 8                         | 188              | 648             | 52              | 65    | 39   | 1000  | 30                          | 247              | 545             | 64              | 34    | 80   | 1000  | 1057                | 216    |

Continued

Table (18.2): Per 1000 distribution of aged persons with illness or otherwise by their perception about change in state of health for each sex

| Rural + Urban                 |                           |                  |                 |                 |       |      |        |                             |                  |                 |                 |       |       |        | Males               |        |
|-------------------------------|---------------------------|------------------|-----------------|-----------------|-------|------|--------|-----------------------------|------------------|-----------------|-----------------|-------|-------|--------|---------------------|--------|
| state/ut                      | aged person with illness  |                  |                 |                 |       |      |        | aged person without illness |                  |                 |                 |       |       |        | no. of aged persons |        |
|                               | compared to previous year |                  |                 |                 |       |      |        | compared to previous year   |                  |                 |                 |       |       |        | estd. (00)          | sample |
|                               | much better               | some-what better | nearly the same | some-what worse | worse | n.r. | total  | much better                 | some what better | nearly the same | some what worse | worse | n.r.  | total  |                     |        |
| (1)                           | (2)                       | (3)              | (4)             | (5)             | (6)   | (7)  | (8)    | (9)                         | (10)             | (11)            | (12)            | (13)  | (14)  | (15)   | (16)                | (17)   |
| Uttaranchal                   | 0                         | 44               | 390             | 395             | 170   | 0    | 1000   | 6                           | 58               | 771             | 102             | 2     | 61    | 1000   | 3232                | 151    |
| Uttar Pradesh                 | 26                        | 71               | 462             | 348             | 60    | 33   | 1000   | 20                          | 96               | 650             | 115             | 13    | 106   | 1000   | 51892               | 2445   |
| West Bengal                   | 24                        | 76               | 481             | 298             | 99    | 23   | 1000   | 31                          | 147              | 543             | 155             | 12    | 113   | 1000   | 26855               | 1202   |
| A & N Islands                 | 0                         | 260              | 614             | 126             | 0     | 0    | 1000   | 9                           | 248              | 714             | 20              | 0     | 8     | 1000   | 94                  | 52     |
| Chandigarh                    | 0                         | 200              | 718             | 73              | 9     | 0    | 1000   | 0                           | 42               | 911             | 47              | 0     | 0     | 1000   | 205                 | 86     |
| Dadra & N. Haveli             | 0                         | 0                | 1000            | 0               | 0     | 0    | 1000   | 0                           | 0                | 863             | 137             | 0     | 0     | 1000   | 82                  | 33     |
| Daman & Diu                   | 0                         | 0                | 911             | 89              | 0     | 0    | 1000   | 0                           | 0                | 945             | 55              | 0     | 0     | 1000   | 14                  | 23     |
| Lakshadweep                   | 0                         | 337              | 416             | 107             | 141   | 0    | 1000   | 0                           | 110              | 826             | 64              | 0     | 0     | 1000   | 15                  | 37     |
| Pondicherry                   | 0                         | 69               | 715             | 215             | 0     | 0    | 1000   | 131                         | 148              | 649             | 73              | 0     | 0     | 1000   | 379                 | 67     |
| OENS                          | 50                        | 195              | 449             | 186             | 54    | 66   | 1000   | 42                          | 167              | 530             | 54              | 16    | 192   | 1000   | 2909                | 1292   |
| GUTs                          | 0                         | 112              | 701             | 183             | 4     | 0    | 1000   | 44                          | 97               | 791             | 67              | 0     | 1     | 1000   | 789                 | 298    |
| all-India                     | 24                        | 86               | 525             | 300             | 48    | 17   | 1000   | 37                          | 110              | 689             | 106             | 9     | 49    | 1000   | 332005              | 17750  |
| estd. no. of aged persons(00) | 2488                      | 8795             | 53801           | 30684           | 4917  | 1724 | 102409 | 8564                        | 25220            | 158205          | 24300           | 2098  | 11207 | 229596 | X                   | X      |
| sample aged persons           | 125                       | 563              | 2691            | 1671            | 340   | 108  | 5498   | 470                         | 1459             | 8137            | 1327            | 137   | 722   | 12252  | X                   | X      |



Table (18.2): Per 1000 distribution of aged persons with illness or otherwise by their perception about change in state of health for each sex

| Rural + Urban     |                           |                  |                 |                 |       |      |       |                             |                  |                 |                 |       |      |       | Females             |        |
|-------------------|---------------------------|------------------|-----------------|-----------------|-------|------|-------|-----------------------------|------------------|-----------------|-----------------|-------|------|-------|---------------------|--------|
| state/ut          | aged person with illness  |                  |                 |                 |       |      |       | aged person without illness |                  |                 |                 |       |      |       | no. of aged persons |        |
|                   | compared to previous year |                  |                 |                 |       |      |       | compared to previous year   |                  |                 |                 |       |      |       | estd. (00)          | sample |
|                   | much better               | some-what better | nearly the same | some-what worse | worse | n.r. | total | much better                 | some what better | nearly the same | some what worse | worse | n.r. | total |                     |        |
| (1)               | (2)                       | (3)              | (4)             | (5)             | (6)   | (7)  | (8)   | (9)                         | (10)             | (11)            | (12)            | (13)  | (14) | (15)  | (16)                | (17)   |
| Andhra Pradesh    | 2                         | 27               | 619             | 296             | 33    | 23   | 1000  | 9                           | 79               | 765             | 117             | 6     | 23   | 1000  | 26195               | 1109   |
| Arunachal Pradesh | 66                        | 283              | 123             | 136             | 29    | 363  | 1000  | 127                         | 106              | 263             | 69              | 9     | 426  | 1000  | 211                 | 148    |
| Assam             | 15                        | 43               | 492             | 275             | 98    | 77   | 1000  | 17                          | 80               | 645             | 115             | 8     | 135  | 1000  | 4806                | 408    |
| Bihar             | 23                        | 81               | 478             | 263             | 93    | 62   | 1000  | 15                          | 74               | 623             | 137             | 30    | 121  | 1000  | 17087               | 823    |
| Chhattisgarh      | 7                         | 48               | 560             | 232             | 121   | 32   | 1000  | 32                          | 242              | 552             | 121             | 17    | 37   | 1000  | 7440                | 378    |
| Delhi             | 0                         | 27               | 813             | 150             | 0     | 10   | 1000  | 14                          | 168              | 735             | 72              | 0     | 11   | 1000  | 2452                | 224    |
| Goa               | 0                         | 0                | 235             | 746             | 19    | 0    | 1000  | 103                         | 82               | 608             | 208             | 0     | 0    | 1000  | 871                 | 72     |
| Gujarat           | 4                         | 102              | 617             | 258             | 19    | 0    | 1000  | 37                          | 162              | 720             | 70              | 5     | 5    | 1000  | 15501               | 689    |
| Haryana           | 69                        | 30               | 295             | 528             | 79    | 0    | 1000  | 22                          | 72               | 683             | 201             | 12    | 10   | 1000  | 7235                | 375    |
| Himachal Pradesh  | 16                        | 80               | 509             | 311             | 71    | 14   | 1000  | 23                          | 69               | 722             | 144             | 6     | 37   | 1000  | 2701                | 396    |
| Jammu & Kashmir   | 0                         | 24               | 509             | 295             | 166   | 5    | 1000  | 26                          | 114              | 701             | 134             | 16    | 9    | 1000  | 1891                | 264    |
| Jharkhand         | 0                         | 47               | 694             | 175             | 54    | 29   | 1000  | 12                          | 47               | 634             | 210             | 61    | 36   | 1000  | 5733                | 370    |
| Karnataka         | 46                        | 118              | 498             | 293             | 46    | 0    | 1000  | 59                          | 101              | 717             | 107             | 6     | 11   | 1000  | 14951               | 756    |
| Kerala            | 6                         | 57               | 523             | 354             | 53    | 6    | 1000  | 4                           | 106              | 719             | 100             | 16    | 55   | 1000  | 19699               | 971    |
| Madhya Pradesh    | 5                         | 75               | 567             | 285             | 44    | 25   | 1000  | 14                          | 87               | 710             | 135             | 10    | 43   | 1000  | 19166               | 871    |
| Maharashtra       | 22                        | 101              | 600             | 204             | 47    | 25   | 1000  | 33                          | 161              | 678             | 106             | 4     | 18   | 1000  | 38001               | 1388   |
| Manipur           | 0                         | 28               | 226             | 550             | 143   | 52   | 1000  | 42                          | 92               | 484             | 125             | 6     | 251  | 1000  | 456                 | 278    |
| Meghalaya         | 0                         | 127              | 401             | 405             | 0     | 67   | 1000  | 37                          | 111              | 722             | 68              | 5     | 58   | 1000  | 479                 | 141    |
| Mizoram           | 0                         | 182              | 207             | 230             | 0     | 382  | 1000  | 75                          | 99               | 299             | 52              | 0     | 475  | 1000  | 137                 | 152    |
| Nagaland          | 0                         | 0                | 659             | 341             | 0     | 0    | 1000  | 69                          | 0                | 625             | 215             | 0     | 91   | 1000  | 47                  | 29     |
| Orissa            | 19                        | 70               | 452             | 372             | 88    | 0    | 1000  | 24                          | 79               | 673             | 175             | 13    | 36   | 1000  | 13339               | 596    |
| Punjab            | 17                        | 118              | 457             | 351             | 53    | 4    | 1000  | 32                          | 80               | 756             | 115             | 8     | 9    | 1000  | 8865                | 403    |
| Rajasthan         | 8                         | 52               | 441             | 398             | 100   | 0    | 1000  | 25                          | 66               | 761             | 128             | 19    | 0    | 1000  | 16075               | 849    |
| Sikkim            | 0                         | 0                | 395             | 605             | 0     | 0    | 1000  | 96                          | 214              | 542             | 54              | 0     | 94   | 1000  | 116                 | 107    |
| Tamil Nadu        | 32                        | 97               | 672             | 186             | 13    | 0    | 1000  | 75                          | 138              | 726             | 56              | 3     | 3    | 1000  | 26130               | 1199   |
| Tripura           | 6                         | 221              | 593             | 49              | 120   | 11   | 1000  | 15                          | 228              | 608             | 80              | 25    | 44   | 1000  | 812                 | 189    |

Continued

Table (18.2): Per 1000 distribution of aged persons with illness or otherwise by their perception about change in state of health for each sex

| Rural + Urban                 |                           |                  |                 |                 |       |      |        |                             |                  |                 |                 |       |       |        | Females             |        |
|-------------------------------|---------------------------|------------------|-----------------|-----------------|-------|------|--------|-----------------------------|------------------|-----------------|-----------------|-------|-------|--------|---------------------|--------|
| state/ut                      | aged person with illness  |                  |                 |                 |       |      |        | aged person without illness |                  |                 |                 |       |       |        | no. of aged persons |        |
|                               | compared to previous year |                  |                 |                 |       |      |        | compared to previous year   |                  |                 |                 |       |       |        | estd. (00)          | sample |
|                               | much better               | some-what better | nearly the same | some-what worse | worse | n.r. | total  | much better                 | some what better | nearly the same | some what worse | worse | n.r.  | total  |                     |        |
| (1)                           | (2)                       | (3)              | (4)             | (5)             | (6)   | (7)  | (8)    | (9)                         | (10)             | (11)            | (12)            | (13)  | (14)  | (15)   | (16)                | (17)   |
| Uttaranchal                   | 0                         | 220              | 449             | 300             | 31    | 0    | 1000   | 0                           | 61               | 751             | 162             | 8     | 18    | 1000   | 2884                | 139    |
| Uttar Pradesh                 | 18                        | 73               | 475             | 333             | 59    | 43   | 1000   | 14                          | 77               | 632             | 166             | 10    | 101   | 1000   | 50887               | 2270   |
| West Bengal                   | 31                        | 65               | 417             | 358             | 89    | 41   | 1000   | 27                          | 92               | 522             | 221             | 27    | 110   | 1000   | 26787               | 1192   |
| A & N Islands                 | 0                         | 75               | 378             | 547             | 0     | 0    | 1000   | 0                           | 197              | 610             | 32              | 0     | 160   | 1000   | 58                  | 37     |
| Chandigarh                    | 0                         | 0                | 668             | 313             | 19    | 0    | 1000   | 0                           | 0                | 934             | 22              | 29    | 15    | 1000   | 155                 | 79     |
| Dadra & N. Haveli             | 0                         | 0                | 74              | 926             | 0     | 0    | 1000   | 0                           | 83               | 869             | 48              | 0     | 0     | 1000   | 42                  | 24     |
| Daman & Diu                   | 0                         | 383              | 617             | 0               | 0     | 0    | 1000   | 8                           | 30               | 913             | 25              | 0     | 25    | 1000   | 29                  | 35     |
| Lakshadweep                   | 0                         | 251              | 517             | 232             | 0     | 0    | 1000   | 82                          | 45               | 873             | 0               | 0     | 0     | 1000   | 19                  | 46     |
| Pondicherry                   | 0                         | 82               | 723             | 135             | 61    | 0    | 1000   | 0                           | 96               | 809             | 95              | 0     | 0     | 1000   | 516                 | 74     |
| OENS                          | 10                        | 177              | 456             | 207             | 79    | 71   | 1000   | 46                          | 145              | 548             | 87              | 11    | 164   | 1000   | 2257                | 1044   |
| GUTs                          | 0                         | 77               | 696             | 176             | 51    | 0    | 1000   | 2                           | 77               | 831             | 57              | 8     | 26    | 1000   | 821                 | 295    |
| all-India                     | 18                        | 74               | 530             | 300             | 55    | 22   | 1000   | 27                          | 103              | 677             | 133             | 13    | 48    | 1000   | 331775              | 17081  |
| estd. no. of aged persons(00) | 1875                      | 7659             | 54877           | 31084           | 5738  | 2327 | 103560 | 6127                        | 23589            | 154420          | 30300           | 2868  | 10909 | 228214 | X                   | X      |
| sample aged persons           | 106                       | 444              | 2767            | 1668            | 331   | 126  | 5442   | 335                         | 1219             | 7655            | 1574            | 162   | 694   | 11639  | X                   | X      |

Table (18.2): Per 1000 distribution of aged persons with illness or otherwise by their perception about change in state of health for each sex

| Rural + Urban     |                           |                  |                 |                 |       |      |       |                             |                  |                 |                 |       |      |       | Persons             |        |
|-------------------|---------------------------|------------------|-----------------|-----------------|-------|------|-------|-----------------------------|------------------|-----------------|-----------------|-------|------|-------|---------------------|--------|
| state/ut          | aged person with illness  |                  |                 |                 |       |      |       | aged person without illness |                  |                 |                 |       |      |       | no. of aged persons |        |
|                   | compared to previous year |                  |                 |                 |       |      |       | compared to previous year   |                  |                 |                 |       |      |       | estd. (00)          | sample |
|                   | much better               | some-what better | nearly the same | some-what worse | worse | n.r. | total | much better                 | some what better | nearly the same | some what worse | worse | n.r. | total |                     |        |
| (1)               | (2)                       | (3)              | (4)             | (5)             | (6)   | (7)  | (8)   | (9)                         | (10)             | (11)            | (12)            | (13)  | (14) | (15)  | (16)                | (17)   |
| Andhra Pradesh    | 5                         | 49               | 591             | 301             | 33    | 21   | 1000  | 19                          | 75               | 780             | 99              | 3     | 25   | 1000  | 50236               | 2183   |
| Arunachal Pradesh | 102                       | 339              | 88              | 157             | 34    | 280  | 1000  | 134                         | 122              | 207             | 49              | 8     | 481  | 1000  | 460                 | 330    |
| Assam             | 10                        | 75               | 497             | 272             | 68    | 78   | 1000  | 32                          | 109              | 626             | 95              | 15    | 122  | 1000  | 11556               | 988    |
| Bihar             | 38                        | 81               | 454             | 330             | 66    | 32   | 1000  | 32                          | 71               | 647             | 125             | 20    | 105  | 1000  | 38403               | 1904   |
| Chhattisgarh      | 8                         | 116              | 527             | 235             | 97    | 18   | 1000  | 35                          | 227              | 570             | 109             | 15    | 43   | 1000  | 12690               | 645    |
| Delhi             | 7                         | 40               | 811             | 131             | 7     | 5    | 1000  | 8                           | 189              | 728             | 63              | 0     | 12   | 1000  | 5002                | 451    |
| Goa               | 7                         | 0                | 189             | 793             | 11    | 0    | 1000  | 99                          | 93               | 630             | 178             | 0     | 0    | 1000  | 1606                | 123    |
| Gujarat           | 24                        | 89               | 636             | 236             | 16    | 0    | 1000  | 31                          | 161              | 725             | 74              | 3     | 5    | 1000  | 30551               | 1337   |
| Haryana           | 33                        | 56               | 361             | 483             | 67    | 0    | 1000  | 21                          | 77               | 711             | 174             | 10    | 7    | 1000  | 14158               | 759    |
| Himachal Pradesh  | 17                        | 79               | 457             | 400             | 40    | 7    | 1000  | 45                          | 71               | 705             | 143             | 5     | 32   | 1000  | 5240                | 792    |
| Jammu & Kashmir   | 2                         | 53               | 459             | 339             | 144   | 2    | 1000  | 29                          | 127              | 724             | 91              | 7     | 22   | 1000  | 4545                | 596    |
| Jharkhand         | 8                         | 102              | 579             | 238             | 41    | 33   | 1000  | 9                           | 62               | 638             | 202             | 45    | 44   | 1000  | 13505               | 866    |
| Karnataka         | 47                        | 111              | 510             | 296             | 34    | 1    | 1000  | 73                          | 121              | 711             | 80              | 3     | 12   | 1000  | 30618               | 1529   |
| Kerala            | 9                         | 60               | 512             | 343             | 64    | 12   | 1000  | 14                          | 123              | 721             | 101             | 11    | 30   | 1000  | 35359               | 1766   |
| Madhya Pradesh    | 5                         | 77               | 569             | 300             | 37    | 12   | 1000  | 16                          | 91               | 722             | 118             | 11    | 42   | 1000  | 37947               | 1739   |
| Maharashtra       | 21                        | 112              | 579             | 227             | 40    | 22   | 1000  | 45                          | 151              | 678             | 104             | 5     | 18   | 1000  | 74193               | 2701   |
| Manipur           | 36                        | 68               | 167             | 483             | 148   | 98   | 1000  | 49                          | 115              | 463             | 104             | 6     | 263  | 1000  | 1043                | 605    |
| Meghalaya         | 0                         | 162              | 392             | 407             | 0     | 38   | 1000  | 27                          | 125              | 737             | 50              | 9     | 52   | 1000  | 988                 | 271    |
| Mizoram           | 83                        | 98               | 193             | 349             | 0     | 277  | 1000  | 33                          | 126              | 274             | 34              | 6     | 528  | 1000  | 341                 | 383    |
| Nagaland          | 231                       | 134              | 313             | 282             | 0     | 39   | 1000  | 16                          | 16               | 792             | 65              | 0     | 112  | 1000  | 224                 | 109    |
| Orissa            | 30                        | 69               | 459             | 377             | 56    | 10   | 1000  | 35                          | 88               | 666             | 160             | 17    | 35   | 1000  | 28256               | 1269   |
| Punjab            | 25                        | 101              | 494             | 326             | 46    | 8    | 1000  | 29                          | 84               | 784             | 82              | 7     | 14   | 1000  | 18274               | 826    |
| Rajasthan         | 11                        | 65               | 509             | 337             | 78    | 0    | 1000  | 23                          | 65               | 772             | 122             | 14    | 4    | 1000  | 31284               | 1672   |
| Sikkim            | 0                         | 62               | 371             | 493             | 74    | 0    | 1000  | 100                         | 190              | 621             | 39              | 0     | 50   | 1000  | 242                 | 233    |
| Tamil Nadu        | 40                        | 98               | 671             | 182             | 9     | 0    | 1000  | 76                          | 130              | 725             | 65              | 2     | 2    | 1000  | 51046               | 2357   |
| Tripura           | 7                         | 203              | 623             | 51              | 90    | 26   | 1000  | 24                          | 239              | 571             | 71              | 30    | 65   | 1000  | 1869                | 405    |

Continued

Table (18.2): Per 1000 distribution of aged persons with illness or otherwise by their perception about change in state of health for each sex

| Rural + Urban                 |                           |                  |                 |                 |       |      |        |                             |                  |                 |                 |       |       |        | Persons             |        |
|-------------------------------|---------------------------|------------------|-----------------|-----------------|-------|------|--------|-----------------------------|------------------|-----------------|-----------------|-------|-------|--------|---------------------|--------|
| state/ut                      | aged person with illness  |                  |                 |                 |       |      |        | aged person without illness |                  |                 |                 |       |       |        | no. of aged persons |        |
|                               | compared to previous year |                  |                 |                 |       |      |        | compared to previous year   |                  |                 |                 |       |       |        | estd. (00)          | sample |
|                               | much better               | some-what better | nearly the same | some-what worse | worse | n.r. | total  | much better                 | some what better | nearly the same | some what worse | worse | n.r.  | total  |                     |        |
| (1)                           | (2)                       | (3)              | (4)             | (5)             | (6)   | (7)  | (8)    | (9)                         | (10)             | (11)            | (12)            | (13)  | (14)  | (15)   | (16)                | (17)   |
| Uttaranchal                   | 0                         | 113              | 413             | 358             | 116   | 0    | 1000   | 3                           | 60               | 761             | 131             | 5     | 40    | 1000   | 6116                | 290    |
| Uttar Pradesh                 | 22                        | 72               | 468             | 341             | 59    | 38   | 1000   | 17                          | 87               | 641             | 141             | 12    | 103   | 1000   | 102779              | 4715   |
| West Bengal                   | 27                        | 71               | 448             | 329             | 94    | 32   | 1000   | 29                          | 120              | 533             | 187             | 20    | 111   | 1000   | 53642               | 2394   |
| A & N Islands                 | 0                         | 211              | 552             | 237             | 0     | 0    | 1000   | 5                           | 226              | 670             | 25              | 0     | 73    | 1000   | 152                 | 89     |
| Chandigarh                    | 0                         | 82               | 688             | 214             | 15    | 0    | 1000   | 0                           | 27               | 920             | 37              | 11    | 6     | 1000   | 360                 | 165    |
| Dadra & N. Haveli             | 0                         | 0                | 271             | 729             | 0     | 0    | 1000   | 0                           | 27               | 865             | 108             | 0     | 0     | 1000   | 124                 | 57     |
| Daman & Diu                   | 0                         | 230              | 735             | 35              | 0     | 0    | 1000   | 5                           | 20               | 923             | 34              | 0     | 17    | 1000   | 43                  | 58     |
| Lakshadweep                   | 0                         | 283              | 479             | 185             | 53    | 0    | 1000   | 39                          | 79               | 849             | 33              | 0     | 0     | 1000   | 35                  | 83     |
| Pondicherry                   | 0                         | 77               | 720             | 165             | 38    | 0    | 1000   | 66                          | 122              | 727             | 84              | 0     | 0     | 1000   | 895                 | 141    |
| OENS                          | 31                        | 187              | 452             | 196             | 65    | 68   | 1000   | 43                          | 157              | 538             | 68              | 14    | 180   | 1000   | 5167                | 2336   |
| GUTs                          | 0                         | 91               | 698             | 179             | 33    | 0    | 1000   | 26                          | 88               | 808             | 63              | 3     | 12    | 1000   | 1609                | 593    |
| all-India                     | 21                        | 80               | 528             | 300             | 52    | 20   | 1000   | 32                          | 107              | 683             | 119             | 11    | 48    | 1000   | 663779              | 34831  |
| estd. no. of aged persons(00) | 4363                      | 16454            | 108677          | 61768           | 10655 | 4051 | 205970 | 14692                       | 48810            | 312625          | 54601           | 4966  | 22117 | 457810 | X                   | X      |
| sample aged persons           | 231                       | 1007             | 5458            | 3339            | 671   | 234  | 10940  | 805                         | 2678             | 15792           | 2901            | 299   | 1416  | 23891  | X                   | X      |

Table (19): Number of hospitalisation cases\* during last 365 days and number of cases among these where any medical services were provided by the employer by source of treatment for each age-group

| All-India                     |                                                                                  |                                                              |        |                   |                                                              |       |                   |                                                              |        | Rural |
|-------------------------------|----------------------------------------------------------------------------------|--------------------------------------------------------------|--------|-------------------|--------------------------------------------------------------|-------|-------------------|--------------------------------------------------------------|--------|-------|
| age-group                     | hospitalised cases receiving medical treatment as inpatient during last 365 days |                                                              |        |                   |                                                              |       |                   |                                                              |        |       |
|                               | male                                                                             |                                                              |        | female            |                                                              |       | persons           |                                                              |        |       |
|                               | estd. number (00)                                                                | no. of cases getting any free medical services from employer |        | estd. number (00) | no. of cases getting any free medical services from employer |       | estd. number (00) | no. of cases getting any free medical services from employer |        |       |
|                               |                                                                                  | govt.                                                        | pvt.   |                   | govt.                                                        | pvt.  |                   | govt.                                                        | pvt.   |       |
| (1)                           | (2)                                                                              | (3)                                                          | (4)    | (5)               | (6)                                                          | (7)   | (8)               | (9)                                                          | (10)   |       |
| 0 – 4                         | 12565                                                                            | 20623                                                        | 5827   | 6494              | 8716                                                         | 8188  | 19059             | 29339                                                        | 14015  |       |
| 5 – 9                         | 5551                                                                             | 3399                                                         | 2206   | 3275              | 5732                                                         | 7000  | 8826              | 9131                                                         | 9206   |       |
| 10 – 14                       | 6409                                                                             | 6511                                                         | 3924   | 3954              | 3287                                                         | 2763  | 10362             | 9797                                                         | 6687   |       |
| 0 – 14                        | 24525                                                                            | 30532                                                        | 11957  | 13722             | 17735                                                        | 17951 | 38248             | 48266                                                        | 29908  |       |
| 15 – 19                       | 5133                                                                             | 3895                                                         | 3460   | 4208              | 2325                                                         | 1445  | 9342              | 6220                                                         | 4905   |       |
| 20 – 24                       | 6155                                                                             | 7160                                                         | 14414  | 7830              | 12039                                                        | 16877 | 13986             | 19199                                                        | 31291  |       |
| 25 – 29                       | 5801                                                                             | 6772                                                         | 11159  | 8143              | 10742                                                        | 11173 | 13944             | 17514                                                        | 22332  |       |
| 15 – 29                       | 17089                                                                            | 17826                                                        | 29033  | 20182             | 25107                                                        | 29495 | 37271             | 42932                                                        | 58528  |       |
| 30 – 34                       | 5617                                                                             | 5277                                                         | 21139  | 7375              | 15621                                                        | 11784 | 12992             | 20898                                                        | 32922  |       |
| 35 – 39                       | 6506                                                                             | 12032                                                        | 5877   | 6925              | 9476                                                         | 10029 | 13430             | 21507                                                        | 15906  |       |
| 40 – 44                       | 6236                                                                             | 24398                                                        | 4410   | 6594              | 17982                                                        | 5437  | 12830             | 42381                                                        | 9847   |       |
| 30 – 44                       | 18359                                                                            | 41706                                                        | 31426  | 20894             | 43079                                                        | 27250 | 39252             | 84786                                                        | 58676  |       |
| 45 – 49                       | 6671                                                                             | 20692                                                        | 34754  | 7055              | 16712                                                        | 2025  | 13727             | 37404                                                        | 36780  |       |
| 50 – 54                       | 5563                                                                             | 14515                                                        | 7587   | 5318              | 10766                                                        | 8278  | 10881             | 25280                                                        | 15865  |       |
| 55 – 59                       | 7400                                                                             | 22424                                                        | 2126   | 5629              | 7161                                                         | 2030  | 13029             | 29585                                                        | 4156   |       |
| 45 – 59                       | 19633                                                                            | 57631                                                        | 44467  | 18003             | 34639                                                        | 12333 | 37636             | 92270                                                        | 56800  |       |
| 60 & above                    | 19684                                                                            | 24276                                                        | 15966  | 14479             | 28668                                                        | 9760  | 34163             | 52944                                                        | 25726  |       |
| all                           | 99290                                                                            | 171971                                                       | 132849 | 87280             | 149227                                                       | 96789 | 186570            | 321198                                                       | 229639 |       |
| estd. no. of hosp. cases (00) | 99290                                                                            | 1720                                                         | 1328   | 87280             | 1492                                                         | 968   | 186570            | 3212                                                         | 2296   |       |
| sample hosp. cases            | 10967                                                                            | 290                                                          | 132    | 9567              | 285                                                          | 123   | 20534             | 575                                                          | 255    |       |

\* cases receiving medical treatment as inpatient

Table (19): Number of hospitalisation cases\* during last 365 days and number of cases among these where any medical services were provided by the employer by source of treatment for each age-group

| age-group                     | hospitalised cases receiving medical treatment as inpatient during last 365 days |                                                              |        |                   |                                                              |       |                   |                                                              |        |
|-------------------------------|----------------------------------------------------------------------------------|--------------------------------------------------------------|--------|-------------------|--------------------------------------------------------------|-------|-------------------|--------------------------------------------------------------|--------|
|                               | male                                                                             |                                                              |        | female            |                                                              |       | persons           |                                                              |        |
|                               | estd. number (00)                                                                | no. of cases getting any free medical services from employer |        | estd. number (00) | no. of cases getting any free medical services from employer |       | estd. number (00) | no. of cases getting any free medical services from employer |        |
|                               |                                                                                  | govt.                                                        | pvt.   |                   | govt.                                                        | pvt.  |                   | govt.                                                        | pvt.   |
| (1)                           | (2)                                                                              | (3)                                                          | (4)    | (5)               | (6)                                                          | (7)   | (8)               | (9)                                                          | (10)   |
| 0 – 4                         | 4834                                                                             | 15538                                                        | 8015   | 2890              | 7330                                                         | 4255  | 7724              | 22868                                                        | 12270  |
| 5 – 9                         | 2293                                                                             | 20074                                                        | 302    | 1695              | 5009                                                         | 1415  | 3988              | 25083                                                        | 1718   |
| 10 – 14                       | 2011                                                                             | 10068                                                        | 4680   | 1634              | 10275                                                        | 5218  | 3645              | 20342                                                        | 9898   |
| 0 – 14                        | 9138                                                                             | 45680                                                        | 12997  | 6219              | 22614                                                        | 10888 | 15357             | 68293                                                        | 23886  |
| 15 – 19                       | 2632                                                                             | 12706                                                        | 5845   | 2130              | 10364                                                        | 2456  | 4761              | 23070                                                        | 8301   |
| 20 – 24                       | 2555                                                                             | 11414                                                        | 6146   | 3726              | 8849                                                         | 2915  | 6282              | 20263                                                        | 9061   |
| 25 – 29                       | 2147                                                                             | 18785                                                        | 5526   | 3438              | 11890                                                        | 4740  | 5586              | 30675                                                        | 10266  |
| 15 – 29                       | 7334                                                                             | 42905                                                        | 17517  | 9294              | 31103                                                        | 10112 | 16629             | 74008                                                        | 27629  |
| 30 – 34                       | 2220                                                                             | 17941                                                        | 11646  | 2654              | 11116                                                        | 11295 | 4874              | 29057                                                        | 22940  |
| 35 – 39                       | 3151                                                                             | 20917                                                        | 25790  | 2964              | 16486                                                        | 16638 | 6114              | 37403                                                        | 42428  |
| 40 – 44                       | 3429                                                                             | 23077                                                        | 5621   | 3125              | 19054                                                        | 11326 | 6554              | 42131                                                        | 16947  |
| 30 – 44                       | 8800                                                                             | 61935                                                        | 43057  | 8743              | 46656                                                        | 39258 | 17542             | 108591                                                       | 82315  |
| 45 – 49                       | 3583                                                                             | 42866                                                        | 3868   | 2955              | 29562                                                        | 4986  | 6537              | 72428                                                        | 8854   |
| 50 – 54                       | 3463                                                                             | 44612                                                        | 9150   | 2312              | 20446                                                        | 3106  | 5775              | 65058                                                        | 12256  |
| 55 – 59                       | 2875                                                                             | 45316                                                        | 4131   | 2747              | 9031                                                         | 3294  | 5622              | 54347                                                        | 7425   |
| 45 – 59                       | 9921                                                                             | 132794                                                       | 17149  | 8014              | 59039                                                        | 11386 | 17935             | 191833                                                       | 28535  |
| 60 & above                    | 9554                                                                             | 62477                                                        | 9870   | 8154              | 77057                                                        | 12954 | 17709             | 139534                                                       | 22825  |
| all                           | 44748                                                                            | 345791                                                       | 100591 | 40424             | 236469                                                       | 84599 | 85172             | 582260                                                       | 185190 |
| estd. no. of hosp. cases (00) | 44748                                                                            | 3458                                                         | 1006   | 40424             | 2365                                                         | 846   | 85172             | 5823                                                         | 1852   |
| sample hosp. cases            | 6339                                                                             | 494                                                          | 165    | 5792              | 416                                                          | 119   | 12131             | 910                                                          | 284    |

\* cases receiving medical treatment as inpatient

Table (19): Number of hospitalisation cases\* during last 365 days and number of cases among these where any medical services were provided by the employer by source of treatment for each age-group

| All-India                     |                                                                                  | Rural+Urban                                                  |        |                   |                                                              |        |                   |                                                              |        |
|-------------------------------|----------------------------------------------------------------------------------|--------------------------------------------------------------|--------|-------------------|--------------------------------------------------------------|--------|-------------------|--------------------------------------------------------------|--------|
| age-group                     | hospitalised cases receiving medical treatment as inpatient during last 365 days |                                                              |        |                   |                                                              |        |                   |                                                              |        |
|                               | male                                                                             |                                                              |        | female            |                                                              |        | persons           |                                                              |        |
|                               | estd. number (00)                                                                | no. of cases getting any free medical services from employer |        | estd. number (00) | no. of cases getting any free medical services from employer |        | estd. number (00) | no. of cases getting any free medical services from employer |        |
|                               |                                                                                  | govt.                                                        | pvt.   |                   | govt.                                                        | pvt.   |                   | govt.                                                        | pvt.   |
| (1)                           | (2)                                                                              | (3)                                                          | (4)    | (5)               | (6)                                                          | (7)    | (8)               | (9)                                                          | (10)   |
| 0 – 4                         | 17399                                                                            | 36160                                                        | 13842  | 9384              | 16046                                                        | 12442  | 26783             | 52206                                                        | 26284  |
| 5 – 9                         | 7844                                                                             | 23473                                                        | 2509   | 4970              | 10741                                                        | 8415   | 12814             | 34214                                                        | 10924  |
| 10 – 14                       | 8420                                                                             | 16578                                                        | 8604   | 5588              | 13561                                                        | 7981   | 14008             | 30140                                                        | 16586  |
| 0 – 14                        | 33663                                                                            | 76212                                                        | 24955  | 19942             | 40348                                                        | 28839  | 53605             | 116560                                                       | 53793  |
| 15 – 19                       | 7765                                                                             | 16600                                                        | 9305   | 6338              | 12689                                                        | 3901   | 14103             | 29290                                                        | 13206  |
| 20 – 24                       | 8711                                                                             | 18574                                                        | 20560  | 11557             | 20888                                                        | 19793  | 20267             | 39462                                                        | 40353  |
| 25 – 29                       | 7948                                                                             | 25557                                                        | 16685  | 11582             | 22632                                                        | 15913  | 19529             | 48189                                                        | 32598  |
| 15 – 29                       | 24423                                                                            | 60731                                                        | 46550  | 29476             | 56209                                                        | 39607  | 53900             | 116940                                                       | 86157  |
| 30 – 34                       | 7837                                                                             | 23218                                                        | 32784  | 10029             | 26737                                                        | 23079  | 17866             | 49955                                                        | 55863  |
| 35 – 39                       | 9656                                                                             | 32949                                                        | 31667  | 9888              | 25962                                                        | 26667  | 19545             | 58911                                                        | 58335  |
| 40 – 44                       | 9665                                                                             | 47475                                                        | 10031  | 9719              | 37036                                                        | 16762  | 19384             | 84511                                                        | 26794  |
| 30 – 44                       | 27159                                                                            | 103641                                                       | 74483  | 29636             | 89735                                                        | 66508  | 56795             | 193377                                                       | 140991 |
| 45 – 49                       | 10254                                                                            | 63558                                                        | 38622  | 10010             | 46274                                                        | 7012   | 20264             | 109833                                                       | 45634  |
| 50 – 54                       | 9026                                                                             | 59126                                                        | 16736  | 7630              | 31212                                                        | 11385  | 16656             | 90338                                                        | 28121  |
| 55 – 59                       | 10275                                                                            | 67740                                                        | 6257   | 8377              | 16192                                                        | 5324   | 18651             | 83932                                                        | 11581  |
| 45 – 59                       | 29555                                                                            | 190425                                                       | 61616  | 26016             | 93678                                                        | 23720  | 55571             | 284103                                                       | 85336  |
| 60 & above                    | 29238                                                                            | 86753                                                        | 25836  | 22633             | 105725                                                       | 22715  | 51872             | 192478                                                       | 48551  |
| all                           | 144038                                                                           | 517762                                                       | 233440 | 127704            | 385696                                                       | 181389 | 271741            | 903458                                                       | 414829 |
| estd. no. of hosp. cases (00) | 144038                                                                           | 5178                                                         | 2334   | 127704            | 3857                                                         | 1814   | 271741            | 9035                                                         | 4148   |
| sample hosp. cases            | 17306                                                                            | 784                                                          | 297    | 15359             | 701                                                          | 242    | 32665             | 1485                                                         | 539    |

\* cases receiving medical treatment as inpatient

Table (20): Rate of hospitalisation (number per 1,00,000) during last 365 days by sex and broad age-group

| All India                                                   |                                              |         |         | Rural                         |         |                               |         |
|-------------------------------------------------------------|----------------------------------------------|---------|---------|-------------------------------|---------|-------------------------------|---------|
| age-group                                                   | rate of hospitalisation during last 365 days |         |         | estd. no. (00)                |         | sample                        |         |
|                                                             | males                                        | females | persons | hospita-<br>lisation<br>cases | persons | hospita-<br>lisation<br>cases | persons |
| (1)                                                         | (2)                                          | (3)     | (4)     | (5)                           | (6)     | (7)                           | (8)     |
| 0 – 14                                                      | 1786                                         | 1092    | 1455    | 38248                         | 2629534 | 3967                          | 87616   |
| 15 – 29                                                     | 1881                                         | 2240    | 2060    | 37271                         | 1809280 | 4266                          | 65376   |
| 30 – 44                                                     | 2657                                         | 3032    | 2844    | 39252                         | 1380084 | 4647                          | 46363   |
| 45 – 59                                                     | 4626                                         | 4280    | 4454    | 37636                         | 845015  | 4152                          | 29855   |
| 60 & above                                                  | 7551                                         | 5698    | 6636    | 34163                         | 514787  | 3502                          | 22768   |
| all                                                         | 2715                                         | 2479    | 2599    | 186570                        | 7178701 | 20534                         | 251978  |
| estd. hospitali-<br>sation<br>cases during 365 days<br>(00) | 99290                                        | 87280   | 186570  | X                             | X       | X                             | X       |
| sample hospitali-<br>sation<br>cases during 365 days        | 10967                                        | 9567    | 20534   | X                             | X       | X                             | X       |
| estd. persons (00)                                          | 3657509                                      | 3521192 | 7178701 | X                             | X       | X                             | X       |
| sample persons                                              | 128629                                       | 123349  | 251978  | X                             | X       | X                             | X       |

Table (20): Rate of hospitalisation (number per 1,00,000) during last 365 days by sex and broad age-group

| All India                                                   |                                              |         |         | Urban                         |         |                               |         |
|-------------------------------------------------------------|----------------------------------------------|---------|---------|-------------------------------|---------|-------------------------------|---------|
| age-group                                                   | rate of hospitalisation during last 365 days |         |         | estd. no. (00)                |         | sample                        |         |
|                                                             | males                                        | females | persons | hospita-<br>lisation<br>cases | persons | hospita-<br>lisation<br>cases | persons |
| (1)                                                         | (2)                                          | (3)     | (4)     | (5)                           | (6)     | (7)                           | (8)     |
| 0 – 14                                                      | 2400                                         | 1831    | 2132    | 15357                         | 720314  | 2140                          | 38544   |
| 15 – 29                                                     | 1947                                         | 2769    | 2334    | 16629                         | 712301  | 2397                          | 37633   |
| 30 – 44                                                     | 3242                                         | 3374    | 3307    | 17542                         | 530515  | 2533                          | 27340   |
| 45 – 59                                                     | 5932                                         | 5302    | 5633    | 17935                         | 318376  | 2637                          | 16759   |
| 60 & above                                                  | 11842                                        | 9695    | 10746   | 17709                         | 164795  | 2424                          | 12801   |
| all                                                         | 3505                                         | 3456    | 3482    | 85172                         | 2446300 | 12131                         | 133077  |
| estd. hospitali-<br>sation<br>cases during 365 days<br>(00) | 44748                                        | 40424   | 85172   | X                             | X       | X                             | X       |
| sample hospitali-<br>sation<br>cases during 365 days        | 6339                                         | 5792    | 12131   | X                             | X       | X                             | X       |
| estd. persons (00)                                          | 1276650                                      | 1169650 | 2446300 | X                             | X       | X                             | X       |
| sample persons                                              | 68070                                        | 65007   | 133077  | X                             | X       | X                             | X       |



Table (20): Rate of hospitalisation (number per 1,00,000) during last 365 days by sex and broad age-group

| All India                                               |                                              | Rural + Urban |         |                               |         |                               |         |
|---------------------------------------------------------|----------------------------------------------|---------------|---------|-------------------------------|---------|-------------------------------|---------|
| age-group                                               | rate of hospitalisation during last 365 days |               |         | estd. no. (00)                |         | sample                        |         |
|                                                         | males                                        | females       | persons | hospita-<br>lisation<br>cases | persons | hospita-<br>lisation<br>cases | persons |
| (1)                                                     | (2)                                          | (3)           | (4)     | (5)                           | (6)     | (7)                           | (8)     |
| 0 – 14                                                  | 1920                                         | 1249          | 1600    | 53605                         | 3349848 | 6107                          | 126160  |
| 15 – 29                                                 | 1900                                         | 2384          | 2138    | 53900                         | 2521581 | 6663                          | 103009  |
| 30 – 44                                                 | 2822                                         | 3125          | 2973    | 56795                         | 1910599 | 7180                          | 73703   |
| 45 – 59                                                 | 4995                                         | 4550          | 4777    | 55571                         | 1163390 | 6789                          | 46614   |
| 60 & above                                              | 8565                                         | 6692          | 7633    | 51872                         | 679582  | 5926                          | 35569   |
| all                                                     | 2919                                         | 2722          | 2823    | 271741                        | 9625001 | 32665                         | 385055  |
| estd. hospitali-sation<br>cases during 365 days<br>(00) | 144038                                       | 127704        | 271741  | X                             | X       | X                             | X       |
| sample hospitali-sation<br>cases during 365 days        | 17306                                        | 15359         | 32665   | X                             | X       | X                             | X       |
| estd. persons (00)                                      | 4934159                                      | 4690841       | 9625001 | X                             | X       | X                             | X       |
| sample persons                                          | 196699                                       | 188356        | 385055  | X                             | X       | X                             | X       |

Table (21): Rate of hospitalised persons (number per 1,00,000) during last 365 days by sex and broad age-group

| All India                                         |                                                   |         |         | Rural                        |         |                              |         |
|---------------------------------------------------|---------------------------------------------------|---------|---------|------------------------------|---------|------------------------------|---------|
| age-group                                         | rate of hospitalised persons during last 365 days |         |         | estd. no. (00)               |         | sample                       |         |
|                                                   | males                                             | females | persons | hospita-<br>lised<br>persons | persons | hospita-<br>lised<br>persons | persons |
| (1)                                               | (2)                                               | (3)     | (4)     | (5)                          | (6)     | (7)                          | (8)     |
| 0 – 14                                            | 1498                                              | 958     | 1240    | 32601                        | 2629534 | 3659                         | 87616   |
| 15 – 29                                           | 1710                                              | 2072    | 1890    | 34202                        | 1809280 | 3986                         | 65376   |
| 30 – 44                                           | 2331                                              | 2722    | 2526    | 34859                        | 1380084 | 4243                         | 46363   |
| 45 – 59                                           | 4064                                              | 3733    | 3899    | 32949                        | 845015  | 3765                         | 29855   |
| 60 & above                                        | 6303                                              | 4894    | 5607    | 28867                        | 514787  | 3094                         | 22768   |
| all                                               | 2348                                              | 2204    | 2277    | 163479                       | 7178701 | 18747                        | 251978  |
| estd. hospitali-sation cases during 365 days (00) | 85885                                             | 77594   | 163479  | X                            | X       | X                            | X       |
| sample hospitali-sation cases during 365 days     | 9971                                              | 8776    | 18747   | X                            | X       | X                            | X       |
| estd. persons (00)                                | 3657509                                           | 3521192 | 7178701 | X                            | X       | X                            | X       |
| sample persons                                    | 128629                                            | 123349  | 251978  | X                            | X       | X                            | X       |

Table (21): Rate of hospitalised persons (number per 1,00,000) during last 365 days by sex and broad age-group

| All India                                         |                                                   |         |         | Urban                        |         |                              |         |
|---------------------------------------------------|---------------------------------------------------|---------|---------|------------------------------|---------|------------------------------|---------|
| age-group                                         | rate of hospitalised persons during last 365 days |         |         | estd. no. (00)               |         | sample                       |         |
|                                                   | males                                             | females | persons | hospita-<br>lised<br>persons | persons | hospita-<br>lised<br>persons | persons |
| (1)                                               | (2)                                               | (3)     | (4)     | (5)                          | (6)     | (7)                          | (8)     |
| 0 – 14                                            | 2176                                              | 1713    | 1958    | 14101                        | 720314  | 1980                         | 38544   |
| 15 – 29                                           | 1764                                              | 2560    | 2139    | 15236                        | 712301  | 2216                         | 37633   |
| 30 – 44                                           | 2824                                              | 3059    | 2939    | 15590                        | 530515  | 2291                         | 27340   |
| 45 – 59                                           | 5080                                              | 4464    | 4788    | 15244                        | 318376  | 2318                         | 16759   |
| 60 & above                                        | 10194                                             | 8085    | 9118    | 15026                        | 164795  | 2113                         | 12801   |
| all                                               | 3079                                              | 3068    | 3074    | 75196                        | 2446300 | 10918                        | 133077  |
| estd. hospitali-sation cases during 365 days (00) | 39311                                             | 35885   | 75196   | X                            | X       | X                            | X       |
| sample hospitali-sation cases during 365 days     | 5685                                              | 5233    | 10918   | X                            | X       | X                            | X       |
| estd. persons (00)                                | 1276650                                           | 1169650 | 2446300 | X                            | X       | X                            | X       |
| sample persons                                    | 68070                                             | 65007   | 133077  | X                            | X       | X                            | X       |

Table (21): Rate of hospitalised persons (number per 1,00,000) during last 365 days by sex and broad age-group

All India

Rural + Urban

| age-group                                         | rate of hospitalised persons during last 365 days |         |         | estd. no. (00)               |         | sample                       |         |
|---------------------------------------------------|---------------------------------------------------|---------|---------|------------------------------|---------|------------------------------|---------|
|                                                   | males                                             | females | persons | hospita-<br>lised<br>persons | persons | hospita-<br>lised<br>persons | persons |
| (1)                                               | (2)                                               | (3)     | (4)     | (5)                          | (6)     | (7)                          | (8)     |
| 0 – 14                                            | 1645                                              | 1118    | 1394    | 46702                        | 3349848 | 5639                         | 126160  |
| 15 – 29                                           | 1726                                              | 2205    | 1961    | 49438                        | 2521581 | 6202                         | 103009  |
| 30 – 44                                           | 2470                                              | 2814    | 2640    | 50449                        | 1910599 | 6534                         | 73703   |
| 45 – 59                                           | 4352                                              | 3926    | 4142    | 48193                        | 1163390 | 6083                         | 46614   |
| 60 & above                                        | 7223                                              | 5688    | 6459    | 43892                        | 679582  | 5207                         | 35569   |
| all                                               | 2537                                              | 2419    | 2480    | 238675                       | 9625001 | 29665                        | 385055  |
| estd. hospitali-sation cases during 365 days (00) | 125196                                            | 113479  | 238675  | X                            | X       | X                            | X       |
| sample hospitali-sation cases during 365 days     | 15656                                             | 14009   | 29665   | X                            | X       | X                            | X       |
| estd. persons (00)                                | 4934159                                           | 4690841 | 9625001 | X                            | X       | X                            | X       |
| sample persons                                    | 196699                                            | 188356  | 385055  | X                            | X       | X                            | X       |

Table (22): Per 1000 distribution of hospitalised cases during last 365 days by nature of ailment for different age-groups and sex

| nature of ailment                                | Rural                                   |       |       |       |            |     | average duration of stay per case (in 0.0 days) | Males                    |        |
|--------------------------------------------------|-----------------------------------------|-------|-------|-------|------------|-----|-------------------------------------------------|--------------------------|--------|
|                                                  | hospitalised cases by age of the person |       |       |       |            |     |                                                 | cases of hospitalisation |        |
|                                                  | 0-14                                    | 15-29 | 30-44 | 45-59 | 60 & above | all |                                                 | estd. no. (00)           | sample |
| (1)                                              | (2)                                     | (3)   | (4)   | (5)   | (6)        | (7) | (8)                                             | (9)                      | (10)   |
| <b>gastro-intestinal</b>                         |                                         |       |       |       |            |     |                                                 |                          |        |
| diarrhoea/ dysentery                             | 151                                     | 70    | 51    | 38    | 33         | 73  | 5.3                                             | 7207                     | 948    |
| gastritis/ gastric or peptic ulcer               | 15                                      | 59    | 53    | 51    | 37         | 41  | 8.9                                             | 4081                     | 574    |
| worm infestation                                 | 6                                       | 3     | 4     | 2     | 4          | 4   | 6.1                                             | 386                      | 47     |
| amoebiasis                                       | 5                                       | 4     | 4     | 1     | 4          | 4   | 11.6                                            | 365                      | 43     |
| hepatitis/ jaundice                              | 26                                      | 46    | 15    | 9     | 5          | 20  | 8.9                                             | 1955                     | 241    |
| <b>cardio-vascular diseases</b>                  |                                         |       |       |       |            |     |                                                 |                          |        |
| heart disease                                    | 10                                      | 14    | 32    | 94    | 95         | 48  | 11                                              | 4770                     | 450    |
| hypertension                                     | 0                                       | 5     | 7     | 31    | 23         | 13  | 5.3                                             | 1279                     | 140    |
| respiratory including ear/ nose/ throat ailments | 106                                     | 17    | 15    | 17    | 25         | 40  | 6.4                                             | 4007                     | 295    |
| tuberculosis                                     | 7                                       | 21    | 59    | 63    | 42         | 37  | 16.1                                            | 3662                     | 469    |
| bronchial asthma                                 | 22                                      | 7     | 25    | 42    | 111        | 41  | 7.8                                             | 4118                     | 386    |
| disorders of joints and bones                    | 19                                      | 19    | 25    | 31    | 30         | 25  | 16.6                                            | 2453                     | 273    |
| diseases of kidney/ urinary system               | 27                                      | 35    | 67    | 53    | 78         | 51  | 11.1                                            | 5085                     | 593    |
| prostatic disorders                              | 2                                       | 2     | 4     | 4     | 12         | 5   | 10.5                                            | 489                      | 75     |
| gynaecological disorders                         | 0                                       | 7     | 2     | 1     | 0          | 2   | 7.1                                             | 182                      | 15     |
| neurological disorders                           | 28                                      | 46    | 25    | 33    | 40         | 34  | 13                                              | 3375                     | 361    |
| psychiatric disorders                            | 3                                       | 21    | 17    | 15    | 9          | 12  | 16.4                                            | 1224                     | 117    |
| <b>eye ailment</b>                               |                                         |       |       |       |            |     |                                                 |                          |        |
| conjunctivitis                                   | 3                                       | 1     | 1     | 1     | 6          | 2   | 4.9                                             | 247                      | 33     |
| glaucoma                                         | 1                                       | 2     | 2     | 13    | 14         | 6   | 6.3                                             | 607                      | 54     |
| cataract                                         | 1                                       | 0     | 2     | 42    | 77         | 24  | 4.6                                             | 2412                     | 276    |
| diseases of skin                                 | 3                                       | 4     | 10    | 4     | 10         | 6   | 9                                               | 588                      | 70     |
| goitre                                           | 1                                       | 0     | 0     | 1     | 0          | 0   | 7.6                                             | 46                       | 8      |
| diabetes mellitus                                | 0                                       | 4     | 12    | 24    | 30         | 14  | 12.5                                            | 1358                     | 140    |
| under-nutrition                                  | 2                                       | 0     | 0     | 0     | 2          | 1   | 7.9                                             | 101                      | 11     |
| anaemia                                          | 9                                       | 5     | 3     | 8     | 2          | 6   | 12.5                                            | 552                      | 63     |
| sexually transmitted diseases                    | 0                                       | 0     | 1     | 1     | 1          | 0   | 29                                              | 40                       | 8      |
| <b>febrile illness</b>                           |                                         |       |       |       |            |     |                                                 |                          |        |
| malaria                                          | 42                                      | 54    | 40    | 26    | 12         | 35  | 5.8                                             | 3437                     | 474    |
| eruptive                                         | 5                                       | 0     | 1     | 0     | 3          | 2   | 7.5                                             | 205                      | 15     |
| mumps                                            | 2                                       | 1     | 0     | 0     | 0          | 1   | 5.4                                             | 65                       | 12     |
| diphtheria                                       | 1                                       | 0     | 0     | 2     | 0          | 1   | 5.2                                             | 70                       | 12     |
| whooping cough                                   | 15                                      | 5     | 0     | 8     | 8          | 8   | 4.9                                             | 771                      | 62     |
| fever of unknown origin                          | 163                                     | 77    | 63    | 55    | 43         | 84  | 6.2                                             | 8371                     | 794    |
| tetanus                                          | 11                                      | 4     | 4     | 2     | 0          | 5   | 15.8                                            | 460                      | 34     |
| filariasis/elephantiasis                         | 1                                       | 1     | 3     | 0     | 2          | 1   | 7.3                                             | 123                      | 14     |
| <b>disability</b>                                |                                         |       |       |       |            |     |                                                 |                          |        |
| locomotor                                        | 24                                      | 11    | 18    | 12    | 17         | 17  | 13.1                                            | 1685                     | 188    |
| visual including blindness (excluding cataract)  | 1                                       | 2     | 2     | 5     | 12         | 4   | 6.9                                             | 402                      | 60     |
| speech                                           | 1                                       | 0     | 0     | 0     | 0          | 0   | 15                                              | 16                       | 1      |
| hearing                                          | 3                                       | 4     | 2     | 3     | 0          | 2   | 5.3                                             | 227                      | 22     |

Continued

Table (22): Per 1000 distribution of hospitalised cases during last 365 days by nature of ailment for different age-groups and sex

| nature of ailment                                | Rural                                   |       |       |       |            |       | average duration of stay per case (in 0.0 days) | Males                    |        |
|--------------------------------------------------|-----------------------------------------|-------|-------|-------|------------|-------|-------------------------------------------------|--------------------------|--------|
|                                                  | hospitalised cases by age of the person |       |       |       |            |       |                                                 | cases of hospitalisation |        |
|                                                  | 0-14                                    | 15-29 | 30-44 | 45-59 | 60 & above | all   |                                                 | estd. no. (00)           | sample |
| (1)                                              | (2)                                     | (3)   | (4)   | (5)   | (6)        | (7)   | (8)                                             | (9)                      | (10)   |
| diseases of mouth/teeth/gum                      | 1                                       | 1     | 3     | 7     | 2          | 3     | 8.3                                             | 258                      | 34     |
| accidents/ injuries/ burns/ fractures/ poisoning | 101                                     | 191   | 202   | 136   | 74         | 137   | 13.2                                            | 13575                    | 1496   |
| cancer and other tumours                         | 6                                       | 36    | 18    | 20    | 18         | 19    | 15.5                                            | 1845                     | 192    |
| other diagnosed ailments                         | 155                                     | 199   | 190   | 136   | 98         | 154   | 9.5                                             | 15288                    | 1643   |
| other undiagnosed ailments                       | 20                                      | 20    | 18    | 11    | 18         | 18    | 9.5                                             | 1771                     | 198    |
| n.r.                                             | 1                                       | 1     | 1     | 1     | 3          | 1     | 8.9                                             | 135                      | 26     |
| total                                            | 1000                                    | 1000  | 1000  | 1000  | 1000       | 1000  | 9.8                                             | 99290                    | 10967  |
| estd. no. of hosp. cases(00)                     | 24525                                   | 17089 | 18359 | 19633 | 19684      | 99290 | X                                               | X                        | X      |
| sample hosp. cases                               | 2564                                    | 1948  | 2145  | 2222  | 2088       | 10967 | X                                               | X                        | X      |

Table (22): Per 1000 distribution of hospitalised cases during last 365 days by nature of ailment for different age-groups and sex

| nature of ailment                                | Rural                                   |       |       |       |            |     | average duration of stay per case (in 0.0 days) | Females                  |        |
|--------------------------------------------------|-----------------------------------------|-------|-------|-------|------------|-----|-------------------------------------------------|--------------------------|--------|
|                                                  | hospitalised cases by age of the person |       |       |       |            |     |                                                 | cases of hospitalisation |        |
|                                                  | 0-14                                    | 15-29 | 30-44 | 45-59 | 60 & above | all |                                                 | estd. no. (00)           | sample |
| (1)                                              | (2)                                     | (3)   | (4)   | (5)   | (6)        | (7) | (8)                                             | (9)                      | (10)   |
| <b>gastro-intestinal</b>                         |                                         |       |       |       |            |     |                                                 |                          |        |
| diarrhoea/ dysentery                             | 200                                     | 51    | 52    | 68    | 62         | 80  | 4.2                                             | 6992                     | 830    |
| gastritis/ gastric or peptic ulcer               | 25                                      | 53    | 68    | 72    | 54         | 57  | 7.8                                             | 4932                     | 539    |
| worm infestation                                 | 9                                       | 2     | 5     | 4     | 0          | 4   | 6.7                                             | 344                      | 57     |
| amoebiasis                                       | 5                                       | 2     | 2     | 1     | 5          | 3   | 5.8                                             | 230                      | 27     |
| hepatitis/ jaundice                              | 24                                      | 9     | 7     | 5     | 4          | 9   | 8.7                                             | 799                      | 143    |
| <b>cardio-vascular diseases</b>                  |                                         |       |       |       |            |     |                                                 |                          |        |
| heart disease                                    | 6                                       | 16    | 38    | 63    | 59         | 36  | 9.3                                             | 3185                     | 361    |
| hypertension                                     | 0                                       | 10    | 17    | 46    | 53         | 24  | 8.4                                             | 2138                     | 196    |
| respiratory including ear/ nose/ throat ailments | 78                                      | 28    | 10    | 15    | 25         | 28  | 7.2                                             | 2484                     | 227    |
| tuberculosis                                     | 12                                      | 19    | 22    | 42    | 18         | 23  | 17.9                                            | 2015                     | 242    |
| bronchial asthma                                 | 20                                      | 9     | 21    | 39    | 47         | 26  | 10.3                                            | 2265                     | 220    |
| disorders of joints and bones                    | 10                                      | 17    | 23    | 33    | 40         | 24  | 10                                              | 2132                     | 199    |
| diseases of kidney/ urinary system               | 11                                      | 13    | 28    | 24    | 28         | 21  | 9.4                                             | 1832                     | 246    |
| prostatic disorders                              | 0                                       | 3     | 3     | 3     | 0          | 2   | 8.3                                             | 194                      | 21     |
| gynaecological disorders                         | 1                                       | 240   | 155   | 66    | 14         | 109 | 8.4                                             | 9493                     | 1137   |
| neurological disorders                           | 23                                      | 26    | 31    | 29    | 35         | 29  | 9.4                                             | 2504                     | 281    |
| psychiatric disorders                            | 7                                       | 9     | 12    | 4     | 5          | 8   | 12.6                                            | 667                      | 78     |
| <b>eye ailment</b>                               |                                         |       |       |       |            |     |                                                 |                          |        |
| conjunctivitis                                   | 0                                       | 0     | 0     | 3     | 3          | 1   | 9.1                                             | 107                      | 21     |
| glaucoma                                         | 2                                       | 0     | 0     | 5     | 9          | 3   | 5.7                                             | 249                      | 39     |
| cataract                                         | 4                                       | 1     | 8     | 43    | 132        | 34  | 4.9                                             | 2935                     | 295    |
| diseases of skin                                 | 11                                      | 3     | 7     | 2     | 8          | 6   | 30                                              | 515                      | 48     |
| goitre                                           | 4                                       | 0     | 1     | 0     | 1          | 1   | 5.4                                             | 90                       | 10     |
| diabetes mellitus                                | 13                                      | 1     | 5     | 48    | 52         | 22  | 8.9                                             | 1938                     | 126    |
| under-nutrition                                  | 1                                       | 1     | 0     | 0     | 1          | 1   | 11.5                                            | 62                       | 9      |
| anaemia                                          | 11                                      | 15    | 17    | 11    | 6          | 12  | 6.2                                             | 1087                     | 134    |
| sexually transmitted diseases                    | 0                                       | 4     | 7     | 3     | 0          | 3   | 7.6                                             | 265                      | 34     |
| <b>febrile illness</b>                           |                                         |       |       |       |            |     |                                                 |                          |        |
| malaria                                          | 48                                      | 32    | 24    | 28    | 10         | 28  | 7.1                                             | 2441                     | 348    |
| eruptive                                         | 3                                       | 0     | 16    | 0     | 2          | 4   | 2.7                                             | 387                      | 10     |
| mumps                                            | 2                                       | 1     | 0     | 2     | 0          | 1   | 3.7                                             | 88                       | 7      |
| diphtheria                                       | 10                                      | 0     | 2     | 0     | 0          | 2   | 5                                               | 193                      | 14     |
| whooping cough                                   | 12                                      | 3     | 4     | 2     | 6          | 5   | 8.4                                             | 441                      | 40     |
| fever of unknown origin                          | 147                                     | 68    | 61    | 60    | 44         | 73  | 6.7                                             | 6373                     | 599    |
| tetanus                                          | 3                                       | 2     | 0     | 0     | 0          | 1   | 7.9                                             | 85                       | 14     |
| filariasis/elephantiasis                         | 0                                       | 1     | 2     | 2     | 2          | 1   | 8.4                                             | 121                      | 21     |
| <b>disability</b>                                |                                         |       |       |       |            |     |                                                 |                          |        |
| locomotor                                        | 10                                      | 5     | 4     | 11    | 20         | 9   | 11.6                                            | 808                      | 97     |
| visual including blindness (excluding cataract)  | 0                                       | 1     | 1     | 7     | 14         | 4   | 8.8                                             | 373                      | 50     |
| speech                                           | 1                                       | 5     | 0     | 1     | 0          | 1   | 9.5                                             | 117                      | 6      |
| hearing                                          | 1                                       | 2     | 0     | 2     | 0          | 1   | 5.5                                             | 96                       | 10     |

Continued

Table (22): Per 1000 distribution of hospitalised cases during last 365 days by nature of ailment for different age-groups and sex

| nature of ailment                                | Rural                                   |       |       |       |            |       | average duration of stay per case (in 0.0 days) | Females                  |        |
|--------------------------------------------------|-----------------------------------------|-------|-------|-------|------------|-------|-------------------------------------------------|--------------------------|--------|
|                                                  | hospitalised cases by age of the person |       |       |       |            |       |                                                 | cases of hospitalisation |        |
|                                                  | 0-14                                    | 15-29 | 30-44 | 45-59 | 60 & above | all   |                                                 | estd. no. (00)           | sample |
| (1)                                              | (2)                                     | (3)   | (4)   | (5)   | (6)        | (7)   | (8)                                             | (9)                      | (10)   |
| diseases of mouth/teeth/gum                      | 1                                       | 2     | 3     | 4     | 1          | 2     | 13.8                                            | 206                      | 27     |
| accidents/ injuries/ burns/ fractures/ poisoning | 87                                      | 55    | 53    | 51    | 65         | 60    | 10.3                                            | 5274                     | 558    |
| cancer and other tumours                         | 11                                      | 27    | 56    | 58    | 36         | 39    | 14.8                                            | 3408                     | 343    |
| other diagnosed ailments                         | 148                                     | 242   | 205   | 128   | 127        | 176   | 8.4                                             | 15334                    | 1655   |
| other undiagnosed ailments                       | 26                                      | 22    | 27    | 14    | 13         | 21    | 7.4                                             | 1813                     | 229    |
| n.r.                                             | 11                                      | 3     | 3     | 0     | 0          | 3     | 148.8                                           | 268                      | 19     |
| total                                            | 1000                                    | 1000  | 1000  | 1000  | 1000       | 1000  | 9                                               | 87280                    | 9567   |
| estd. no. of hosp. cases(00)                     | 13722                                   | 20182 | 20894 | 18003 | 14479      | 87280 | X                                               | X                        | X      |
| sample hosp. cases                               | 1403                                    | 2318  | 2502  | 1930  | 1414       | 9567  | X                                               | X                        | X      |

Table (22): Per 1000 distribution of hospitalised cases during last 365 days by nature of ailment for different age-groups and sex

| nature of ailment                                | hospitalised cases by age of the person |       |       |       |            |     | average duration of stay per case (in 0.0 days) | cases of hospitalisation |        |
|--------------------------------------------------|-----------------------------------------|-------|-------|-------|------------|-----|-------------------------------------------------|--------------------------|--------|
|                                                  | 0-14                                    | 15-29 | 30-44 | 45-59 | 60 & above | all |                                                 | estd. no. (00)           | sample |
|                                                  | (2)                                     | (3)   | (4)   | (5)   | (6)        | (7) |                                                 |                          |        |
| <b>All-India</b>                                 |                                         |       |       |       |            |     |                                                 |                          |        |
| <b>Rural</b>                                     |                                         |       |       |       |            |     |                                                 |                          |        |
| <b>Persons</b>                                   |                                         |       |       |       |            |     |                                                 |                          |        |
| <b>gastro-intestinal</b>                         |                                         |       |       |       |            |     |                                                 |                          |        |
| diarrhoea/ dysentery                             | 168                                     | 60    | 52    | 52    | 45         | 76  | 4.8                                             | 14200                    | 1778   |
| gastritis/ gastric or peptic ulcer               | 19                                      | 56    | 61    | 61    | 44         | 48  | 8.3                                             | 9013                     | 1113   |
| worm infestation                                 | 7                                       | 3     | 5     | 3     | 2          | 4   | 6.4                                             | 729                      | 104    |
| amoebiasis                                       | 5                                       | 3     | 3     | 1     | 4          | 3   | 9.4                                             | 595                      | 70     |
| hepatitis/ jaundice                              | 25                                      | 26    | 10    | 7     | 5          | 15  | 8.9                                             | 2753                     | 384    |
| <b>cardio-vascular diseases</b>                  |                                         |       |       |       |            |     |                                                 |                          |        |
| heart disease                                    | 8                                       | 15    | 35    | 79    | 80         | 43  | 10.3                                            | 7956                     | 811    |
| hypertension                                     | 0                                       | 8     | 12    | 38    | 36         | 18  | 7.2                                             | 3417                     | 336    |
| respiratory including ear/ nose/ throat ailments | 96                                      | 23    | 13    | 17    | 25         | 35  | 6.7                                             | 6492                     | 522    |
| tuberculosis                                     | 8                                       | 20    | 39    | 53    | 32         | 30  | 16.8                                            | 5676                     | 711    |
| bronchial asthma                                 | 21                                      | 8     | 23    | 40    | 84         | 34  | 8.7                                             | 6383                     | 606    |
| disorders of joints and bones                    | 16                                      | 18    | 24    | 32    | 34         | 25  | 13.5                                            | 4584                     | 472    |
| diseases of kidney/ urinary system               | 21                                      | 23    | 46    | 39    | 57         | 37  | 10.6                                            | 6916                     | 839    |
| prostatic disorders                              | 2                                       | 3     | 4     | 4     | 7          | 4   | 9.9                                             | 683                      | 96     |
| gynaecological disorders                         | 0                                       | 133   | 84    | 32    | 6          | 52  | 8.4                                             | 9675                     | 1152   |
| neurological disorders                           | 26                                      | 35    | 28    | 31    | 38         | 32  | 11.5                                            | 5879                     | 642    |
| psychiatric disorders                            | 4                                       | 15    | 15    | 9     | 8          | 10  | 15.1                                            | 1891                     | 195    |
| <b>eye ailment</b>                               |                                         |       |       |       |            |     |                                                 |                          |        |
| conjunctivitis                                   | 2                                       | 0     | 1     | 2     | 5          | 2   | 6.2                                             | 354                      | 54     |
| glaucoma                                         | 1                                       | 1     | 1     | 9     | 11         | 5   | 6.2                                             | 856                      | 93     |
| cataract                                         | 2                                       | 1     | 5     | 43    | 100        | 29  | 4.8                                             | 5347                     | 571    |
| diseases of skin                                 | 6                                       | 3     | 8     | 3     | 9          | 6   | 18.8                                            | 1102                     | 118    |
| goitre                                           | 2                                       | 0     | 0     | 0     | 1          | 1   | 6.2                                             | 136                      | 18     |
| diabetes mellitus                                | 5                                       | 3     | 8     | 35    | 40         | 18  | 10.4                                            | 3297                     | 266    |
| under-nutrition                                  | 2                                       | 1     | 0     | 0     | 1          | 1   | 9.2                                             | 163                      | 20     |
| anaemia                                          | 10                                      | 10    | 10    | 9     | 4          | 9   | 8.4                                             | 1638                     | 197    |
| sexually transmitted diseases                    | 0                                       | 2     | 4     | 2     | 0          | 2   | 10.4                                            | 305                      | 42     |
| <b>febrile illness</b>                           |                                         |       |       |       |            |     |                                                 |                          |        |
| malaria                                          | 44                                      | 42    | 32    | 27    | 11         | 32  | 6.3                                             | 5878                     | 822    |
| eruptive                                         | 4                                       | 0     | 9     | 0     | 2          | 3   | 4.4                                             | 592                      | 25     |
| mumps                                            | 2                                       | 1     | 0     | 1     | 0          | 1   | 4.4                                             | 153                      | 19     |
| diphtheria                                       | 4                                       | 0     | 1     | 1     | 0          | 1   | 5.1                                             | 263                      | 26     |
| whooping cough                                   | 14                                      | 4     | 2     | 5     | 7          | 6   | 6.2                                             | 1212                     | 102    |
| fever of unknown origin                          | 157                                     | 72    | 62    | 57    | 43         | 79  | 6.4                                             | 14744                    | 1393   |
| tetanus                                          | 8                                       | 3     | 2     | 1     | 0          | 3   | 14.6                                            | 545                      | 48     |
| filariasis/elephantiasis                         | 1                                       | 1     | 2     | 1     | 2          | 1   | 7.8                                             | 244                      | 35     |
| <b>disability</b>                                |                                         |       |       |       |            |     |                                                 |                          |        |
| locomotor                                        | 19                                      | 8     | 10    | 11    | 18         | 13  | 12.6                                            | 2493                     | 285    |
| visual including blindness (excluding cataract)  | 0                                       | 1     | 2     | 6     | 13         | 4   | 7.8                                             | 775                      | 110    |
| speech                                           | 1                                       | 2     | 0     | 0     | 0          | 1   | 10.1                                            | 133                      | 7      |
| hearing                                          | 2                                       | 3     | 1     | 2     | 0          | 2   | 5.3                                             | 323                      | 32     |

Continued



Table (22): Per 1000 distribution of hospitalised cases during last 365 days by nature of ailment for different age-groups and sex

| nature of ailment                                | Rural                                   |       |       |       |            |        | average duration of stay per case (in 0.0 days) | Persons                  |                |        |
|--------------------------------------------------|-----------------------------------------|-------|-------|-------|------------|--------|-------------------------------------------------|--------------------------|----------------|--------|
|                                                  | hospitalised cases by age of the person |       |       |       |            |        |                                                 | cases of hospitalisation | estd. no. (00) | sample |
|                                                  | 0-14                                    | 15-29 | 30-44 | 45-59 | 60 & above | all    |                                                 |                          |                |        |
| (1)                                              | (2)                                     | (3)   | (4)   | (5)   | (6)        | (7)    | (8)                                             | (9)                      | (10)           |        |
| diseases of mouth/teeth/gum                      | 1                                       | 2     | 3     | 6     | 1          | 2      | 10.7                                            | 464                      | 61             |        |
| accidents/ injuries/ burns/ fractures/ poisoning | 96                                      | 117   | 123   | 95    | 70         | 101    | 12.4                                            | 18849                    | 2054           |        |
| cancer and other tumours                         | 8                                       | 31    | 38    | 38    | 26         | 28     | 15.1                                            | 5253                     | 535            |        |
| other diagnosed ailments                         | 153                                     | 222   | 198   | 132   | 110        | 164    | 9                                               | 30622                    | 3298           |        |
| other undiagnosed ailments                       | 22                                      | 22    | 23    | 13    | 16         | 19     | 8.4                                             | 3584                     | 427            |        |
| n.r.                                             | 5                                       | 2     | 2     | 0     | 2          | 2      | 102                                             | 402                      | 45             |        |
| total                                            | 1000                                    | 1000  | 1000  | 1000  | 1000       | 1000   | 9.4                                             | 186570                   | 20534          |        |
| estd. no. of hosp. cases(00)                     | 38248                                   | 37271 | 39252 | 37636 | 34163      | 186570 | X                                               | X                        | X              |        |
| sample hosp. cases                               | 3967                                    | 4266  | 4647  | 4152  | 3502       | 20534  | X                                               | X                        | X              |        |

Table (22): Per 1000 distribution of hospitalised cases during last 365 days by nature of ailment for different age-groups and sex

| nature of ailment                                | hospitalised cases by age of the person |       |       |       |            |     | average duration of stay per case (in 0.0 days) | cases of hospitalisation |        |     |
|--------------------------------------------------|-----------------------------------------|-------|-------|-------|------------|-----|-------------------------------------------------|--------------------------|--------|-----|
|                                                  | 0-14                                    | 15-29 | 30-44 | 45-59 | 60 & above | all |                                                 | estd. no. (00)           | sample |     |
|                                                  | (2)                                     | (3)   | (4)   | (5)   | (6)        | (7) |                                                 |                          |        | (8) |
| <b>All-India</b>                                 | <b>Urban</b>                            |       |       |       |            |     | <b>Males</b>                                    |                          |        |     |
| (1)                                              | (2)                                     | (3)   | (4)   | (5)   | (6)        | (7) | (8)                                             | (9)                      | (10)   |     |
| <b>gastro-intestinal</b>                         |                                         |       |       |       |            |     |                                                 |                          |        |     |
| diarrhoea/ dysentery                             | 157                                     | 54    | 59    | 23    | 22         | 62  | 3.9                                             | 2787                     | 435    |     |
| gastritis/ gastric or peptic ulcer               | 10                                      | 52    | 64    | 51    | 30         | 41  | 7.4                                             | 1834                     | 311    |     |
| worm infestation                                 | 9                                       | 2     | 4     | 5     | 1          | 4   | 5.9                                             | 199                      | 34     |     |
| amoebiasis                                       | 8                                       | 0     | 3     | 1     | 1          | 3   | 7.1                                             | 123                      | 22     |     |
| hepatitis/ jaundice                              | 37                                      | 46    | 20    | 20    | 14         | 26  | 8.7                                             | 1185                     | 169    |     |
| <b>cardio-vascular diseases</b>                  |                                         |       |       |       |            |     |                                                 |                          |        |     |
| heart disease                                    | 13                                      | 26    | 61    | 166   | 165        | 91  | 9.3                                             | 4083                     | 584    |     |
| hypertension                                     | 0                                       | 12    | 36    | 49    | 50         | 31  | 6.3                                             | 1366                     | 184    |     |
| respiratory including ear/ nose/ throat ailments | 58                                      | 34    | 8     | 22    | 21         | 28  | 6.9                                             | 1263                     | 175    |     |
| tuberculosis                                     | 3                                       | 13    | 55    | 27    | 11         | 22  | 16.9                                            | 987                      | 127    |     |
| bronchial asthma                                 | 31                                      | 7     | 7     | 35    | 80         | 34  | 7.7                                             | 1505                     | 190    |     |
| disorders of joints and bones                    | 13                                      | 25    | 28    | 33    | 26         | 25  | 9.7                                             | 1131                     | 156    |     |
| diseases of kidney/ urinary system               | 42                                      | 44    | 73    | 61    | 89         | 63  | 8.2                                             | 2809                     | 372    |     |
| prostatic disorders                              | 1                                       | 5     | 5     | 10    | 14         | 7   | 8.6                                             | 318                      | 49     |     |
| gynaecological disorders                         | 0                                       | 1     | 0     | 0     | 1          | 0   | 3.5                                             | 21                       | 9      |     |
| neurological disorders                           | 44                                      | 41    | 27    | 28    | 51         | 38  | 16.9                                            | 1709                     | 254    |     |
| psychiatric disorders                            | 2                                       | 11    | 6     | 9     | 1          | 6   | 17.9                                            | 253                      | 45     |     |
| <b>eye ailment</b>                               |                                         |       |       |       |            |     |                                                 |                          |        |     |
| conjunctivitis                                   | 2                                       | 4     | 0     | 6     | 1          | 3   | 6.9                                             | 113                      | 14     |     |
| glaucoma                                         | 0                                       | 0     | 0     | 4     | 6          | 2   | 5.1                                             | 92                       | 17     |     |
| cataract                                         | 0                                       | 2     | 1     | 25    | 64         | 20  | 4.7                                             | 889                      | 138    |     |
| diseases of skin                                 | 4                                       | 8     | 7     | 9     | 1          | 6   | 14.6                                            | 261                      | 32     |     |
| goitre                                           | 0                                       | 0     | 6     | 0     | 0          | 1   | 11.4                                            | 51                       | 4      |     |
| diabetes mellitus                                | 0                                       | 6     | 5     | 44    | 68         | 26  | 10.1                                            | 1185                     | 152    |     |
| under-nutrition                                  | 2                                       | 0     | 0     | 0     | 1          | 1   | 5.4                                             | 32                       | 5      |     |
| anaemia                                          | 8                                       | 8     | 28    | 7     | 3          | 11  | 3.8                                             | 479                      | 42     |     |
| sexually transmitted diseases                    | 0                                       | 1     | 0     | 1     | 0          | 0   | 4.3                                             | 21                       | 4      |     |
| <b>febrile illness</b>                           |                                         |       |       |       |            |     |                                                 |                          |        |     |
| malaria                                          | 58                                      | 67    | 67    | 20    | 4          | 41  | 5.1                                             | 1843                     | 239    |     |
| eruptive                                         | 0                                       | 0     | 1     | 1     | 0          | 1   | 5.7                                             | 23                       | 5      |     |
| mumps                                            | 0                                       | 0     | 0     | 0     | 0          | 0   | 10                                              | 0                        | 1      |     |
| diphtheria                                       | 5                                       | 13    | 1     | 8     | 0          | 5   | 6.8                                             | 228                      | 12     |     |
| whooping cough                                   | 29                                      | 1     | 4     | 1     | 4          | 8   | 4.8                                             | 357                      | 48     |     |
| fever of unknown origin                          | 139                                     | 95    | 58    | 27    | 25         | 67  | 6.6                                             | 2987                     | 414    |     |
| tetanus                                          | 3                                       | 1     | 0     | 2     | 5          | 2   | 16.5                                            | 109                      | 8      |     |
| filariasis/elephantiasis                         | 2                                       | 2     | 1     | 3     | 1          | 2   | 8.4                                             | 82                       | 15     |     |
| <b>disability</b>                                |                                         |       |       |       |            |     |                                                 |                          |        |     |
| locomotor                                        | 3                                       | 5     | 6     | 13    | 22         | 10  | 13.7                                            | 458                      | 83     |     |
| visual including blindness (excluding cataract)  | 0                                       | 5     | 0     | 4     | 5          | 3   | 5.1                                             | 125                      | 16     |     |
| speech                                           | 0                                       | 0     | 0     | 0     | 0          | 0   | 8.2                                             | 9                        | 3      |     |
| hearing                                          | 2                                       | 0     | 1     | 2     | 2          | 1   | 12.7                                            | 51                       | 5      |     |

Continued

Table (22): Per 1000 distribution of hospitalised cases during last 365 days by nature of ailment for different age-groups and sex

| nature of ailment                                | hospitalised cases by age of the person |       |       |       |            |       | average duration of stay per case (in 0.0 days) | cases of hospitalisation |        |
|--------------------------------------------------|-----------------------------------------|-------|-------|-------|------------|-------|-------------------------------------------------|--------------------------|--------|
|                                                  | 0-14                                    | 15-29 | 30-44 | 45-59 | 60 & above | all   |                                                 | estd. no. (00)           | sample |
| (1)                                              | (2)                                     | (3)   | (4)   | (5)   | (6)        | (7)   | (8)                                             | (9)                      | (10)   |
| diseases of mouth/teeth/gum                      | 2                                       | 2     | 1     | 2     | 0          | 1     | 6                                               | 62                       | 13     |
| accidents/ injuries/ burns/ fractures/ poisoning | 90                                      | 198   | 157   | 98    | 52         | 115   | 14.8                                            | 5128                     | 771    |
| cancer and other tumours                         | 9                                       | 31    | 38    | 51    | 25         | 31    | 10.3                                            | 1387                     | 126    |
| other diagnosed ailments                         | 189                                     | 165   | 150   | 128   | 115        | 148   | 8.4                                             | 6637                     | 969    |
| other undiagnosed ailments                       | 17                                      | 12    | 12    | 2     | 11         | 11    | 7.6                                             | 471                      | 75     |
| n.r.                                             | 1                                       | 1     | 0     | 0     | 8          | 2     | 5.7                                             | 93                       | 12     |
| total                                            | 1000                                    | 1000  | 1000  | 1000  | 1000       | 1000  | 9.1                                             | 44748                    | 6339   |
| estd. no. of hosp. cases(00)                     | 9138                                    | 7334  | 8800  | 9921  | 9554       | 44748 | X                                               | X                        | X      |
| sample hosp. cases                               | 1296                                    | 1063  | 1202  | 1426  | 1352       | 6339  | X                                               | X                        | X      |

Table (22): Per 1000 distribution of hospitalised cases during last 365 days by nature of ailment for different age-groups and sex

| nature of ailment                                | Urban                                   |       |       |       |            |     | average duration of stay per case (in 0.0 days) | Females                  |        |
|--------------------------------------------------|-----------------------------------------|-------|-------|-------|------------|-----|-------------------------------------------------|--------------------------|--------|
|                                                  | hospitalised cases by age of the person |       |       |       |            |     |                                                 | cases of hospitalisation |        |
|                                                  | 0-14                                    | 15-29 | 30-44 | 45-59 | 60 & above | all |                                                 | estd. no. (00)           | sample |
| (1)                                              | (2)                                     | (3)   | (4)   | (5)   | (6)        | (7) | (8)                                             | (9)                      | (10)   |
| <b>gastro-intestinal</b>                         |                                         |       |       |       |            |     |                                                 |                          |        |
| diarrhoea/ dysentery                             | 138                                     | 67    | 45    | 46    | 33         | 62  | 4.7                                             | 2514                     | 442    |
| gastritis/ gastric or peptic ulcer               | 8                                       | 51    | 54    | 41    | 24         | 38  | 7                                               | 1517                     | 257    |
| worm infestation                                 | 17                                      | 1     | 3     | 2     | 2          | 4   | 4.2                                             | 175                      | 26     |
| amoebiasis                                       | 10                                      | 2     | 9     | 2     | 1          | 5   | 6.6                                             | 186                      | 26     |
| hepatitis/ jaundice                              | 57                                      | 14    | 13    | 3     | 4          | 16  | 7.5                                             | 659                      | 83     |
| <b>cardio-vascular diseases</b>                  |                                         |       |       |       |            |     |                                                 |                          |        |
| heart disease                                    | 15                                      | 29    | 48    | 80    | 162        | 68  | 9.5                                             | 2750                     | 341    |
| hypertension                                     | 2                                       | 14    | 38    | 49    | 59         | 33  | 6.2                                             | 1342                     | 195    |
| respiratory including ear/ nose/ throat ailments | 63                                      | 20    | 20    | 30    | 34         | 31  | 7.5                                             | 1264                     | 167    |
| tuberculosis                                     | 7                                       | 22    | 9     | 18    | 5          | 12  | 14.9                                            | 499                      | 82     |
| bronchial asthma                                 | 14                                      | 10    | 19    | 37    | 54         | 27  | 8.2                                             | 1078                     | 158    |
| disorders of joints and bones                    | 15                                      | 4     | 22    | 48    | 45         | 27  | 12                                              | 1079                     | 161    |
| diseases of kidney/ urinary system               | 26                                      | 32    | 41    | 34    | 33         | 34  | 8.1                                             | 1361                     | 215    |
| prostatic disorders                              | 2                                       | 1     | 3     | 0     | 0          | 1   | 8.9                                             | 44                       | 14     |
| gynaecological disorders                         | 2                                       | 239   | 148   | 74    | 18         | 106 | 7.7                                             | 4270                     | 658    |
| neurological disorders                           | 39                                      | 14    | 27    | 16    | 33         | 25  | 9.1                                             | 1017                     | 161    |
| psychiatric disorders                            | 6                                       | 4     | 4     | 10    | 3          | 6   | 14.1                                            | 225                      | 27     |
| <b>eye ailment</b>                               |                                         |       |       |       |            |     |                                                 |                          |        |
| conjunctivitis                                   | 0                                       | 0     | 1     | 3     | 3          | 1   | 7.5                                             | 60                       | 10     |
| glaucoma                                         | 1                                       | 2     | 4     | 8     | 50         | 13  | 3.7                                             | 526                      | 33     |
| cataract                                         | 0                                       | 2     | 8     | 37    | 94         | 28  | 4                                               | 1151                     | 166    |
| diseases of skin                                 | 5                                       | 7     | 12    | 6     | 1          | 6   | 6.2                                             | 252                      | 35     |
| goitre                                           | 0                                       | 2     | 3     | 3     | 0          | 2   | 12.3                                            | 71                       | 11     |
| diabetes mellitus                                | 0                                       | 0     | 14    | 51    | 36         | 20  | 7.8                                             | 828                      | 125    |
| under-nutrition                                  | 15                                      | 2     | 0     | 0     | 0          | 3   | 7.7                                             | 110                      | 10     |
| anaemia                                          | 2                                       | 11    | 18    | 14    | 5          | 11  | 6.3                                             | 428                      | 63     |
| sexually transmitted diseases                    | 0                                       | 1     | 1     | 1     | 0          | 1   | 6.9                                             | 27                       | 9      |
| <b>febrile illness</b>                           |                                         |       |       |       |            |     |                                                 |                          |        |
| malaria                                          | 49                                      | 40    | 39    | 22    | 6          | 31  | 6.5                                             | 1249                     | 202    |
| eruptive                                         | 4                                       | 2     | 1     | 0     | 0          | 1   | 5.6                                             | 54                       | 9      |
| mumps                                            | 2                                       | 1     | 0     | 0     | 0          | 1   | 7.6                                             | 24                       | 5      |
| diphtheria                                       | 22                                      | 0     | 0     | 0     | 0          | 4   | 3.8                                             | 145                      | 8      |
| whooping cough                                   | 13                                      | 2     | 2     | 1     | 2          | 4   | 6.2                                             | 142                      | 18     |
| fever of unknown origin                          | 162                                     | 77    | 54    | 39    | 31         | 68  | 5.7                                             | 2756                     | 356    |
| tetanus                                          | 5                                       | 2     | 1     | 0     | 0          | 1   | 12.8                                            | 60                       | 4      |
| filariasis/elephantiasis                         | 0                                       | 0     | 1     | 2     | 0          | 1   | 6.5                                             | 25                       | 5      |
| <b>disability</b>                                |                                         |       |       |       |            |     |                                                 |                          |        |
| locomotor                                        | 7                                       | 2     | 4     | 7     | 16         | 7   | 12.5                                            | 275                      | 43     |
| visual including blindness (excluding cataract)  | 2                                       | 0     | 1     | 7     | 7          | 3   | 10.3                                            | 130                      | 23     |
| speech                                           | 0                                       | 0     | 0     | 1     | 0          | 0   | 15                                              | 11                       | 1      |
| hearing                                          | 0                                       | 1     | 2     | 1     | 0          | 1   | 7.3                                             | 26                       | 6      |

Continued

Table (22): Per 1000 distribution of hospitalised cases during last 365 days by nature of ailment for different age-groups and sex

| nature of ailment                                | hospitalised cases by age of the person |       |       |       |            |       | average duration of stay per case (in 0.0 days) | cases of hospitalisation |        |
|--------------------------------------------------|-----------------------------------------|-------|-------|-------|------------|-------|-------------------------------------------------|--------------------------|--------|
|                                                  | 0-14                                    | 15-29 | 30-44 | 45-59 | 60 & above | all   |                                                 | estd. no. (00)           | sample |
|                                                  | (2)                                     | (3)   | (4)   | (5)   | (6)        | (7)   |                                                 |                          |        |
| diseases of mouth/teeth/gum                      | 3                                       | 2     | 1     | 5     | 0          | 2     | 12                                              | 83                       | 17     |
| accidents/ injuries/ burns/ fractures/ poisoning | 98                                      | 33    | 49    | 56    | 67         | 58    | 9.8                                             | 2346                     | 294    |
| cancer and other tumours                         | 11                                      | 19    | 34    | 42    | 56         | 33    | 19.5                                            | 1337                     | 191    |
| other diagnosed ailments                         | 165                                     | 247   | 202   | 192   | 103        | 185   | 7.9                                             | 7460                     | 1015   |
| other undiagnosed ailments                       | 13                                      | 21    | 37    | 11    | 10         | 19    | 7.1                                             | 776                      | 103    |
| n.r.                                             | 1                                       | 1     | 6     | 0     | 2          | 2     | 5.5                                             | 92                       | 17     |
| total                                            | 1000                                    | 1000  | 1000  | 1000  | 1000       | 1000  | 8                                               | 40424                    | 5792   |
| estd. no. of hosp. cases(00)                     | 6219                                    | 9294  | 8743  | 8014  | 8154       | 40424 | X                                               | X                        | X      |
| sample hosp. cases                               | 844                                     | 1334  | 1331  | 1211  | 1072       | 5792  | X                                               | X                        | X      |

Table (22): Per 1000 distribution of hospitalised cases during last 365 days by nature of ailment for different age-groups and sex

| nature of ailment                                | hospitalised cases by age of the person |       |       |       |            |     | average duration of stay per case (in 0.0 days) | cases of hospitalisation |        |     |
|--------------------------------------------------|-----------------------------------------|-------|-------|-------|------------|-----|-------------------------------------------------|--------------------------|--------|-----|
|                                                  | 0-14                                    | 15-29 | 30-44 | 45-59 | 60 & above | all |                                                 | estd. no. (00)           | sample |     |
|                                                  | (2)                                     | (3)   | (4)   | (5)   | (6)        | (7) |                                                 |                          |        | (8) |
| <b>All-India</b>                                 | <b>Urban</b>                            |       |       |       |            |     | <b>Persons</b>                                  |                          |        |     |
| (1)                                              | (2)                                     | (3)   | (4)   | (5)   | (6)        | (7) | (8)                                             | (9)                      | (10)   |     |
| <b>gastro-intestinal</b>                         |                                         |       |       |       |            |     |                                                 |                          |        |     |
| diarrhoea/ dysentery                             | 150                                     | 61    | 52    | 33    | 27         | 62  | 4.3                                             | 5300                     | 877    |     |
| gastritis/ gastric or peptic ulcer               | 9                                       | 51    | 59    | 47    | 27         | 39  | 7.2                                             | 3350                     | 568    |     |
| worm infestation                                 | 12                                      | 1     | 4     | 4     | 1          | 4   | 5.1                                             | 374                      | 60     |     |
| amoebiasis                                       | 9                                       | 1     | 6     | 2     | 1          | 4   | 6.8                                             | 309                      | 48     |     |
| hepatitis/ jaundice                              | 45                                      | 28    | 17    | 13    | 9          | 22  | 8.2                                             | 1844                     | 252    |     |
| <b>cardio-vascular diseases</b>                  |                                         |       |       |       |            |     |                                                 |                          |        |     |
| heart disease                                    | 14                                      | 28    | 55    | 128   | 164        | 80  | 9.4                                             | 6834                     | 925    |     |
| hypertension                                     | 1                                       | 13    | 37    | 49    | 54         | 32  | 6.2                                             | 2708                     | 379    |     |
| respiratory including ear/ nose/ throat ailments | 60                                      | 26    | 14    | 25    | 27         | 30  | 7.2                                             | 2526                     | 342    |     |
| tuberculosis                                     | 5                                       | 18    | 32    | 23    | 8          | 17  | 16.3                                            | 1486                     | 209    |     |
| bronchial asthma                                 | 24                                      | 8     | 13    | 36    | 68         | 30  | 7.9                                             | 2583                     | 348    |     |
| disorders of joints and bones                    | 14                                      | 13    | 25    | 40    | 35         | 26  | 10.8                                            | 2210                     | 317    |     |
| diseases of kidney/ urinary system               | 36                                      | 38    | 57    | 49    | 63         | 49  | 8.1                                             | 4171                     | 587    |     |
| prostatic disorders                              | 2                                       | 3     | 4     | 5     | 7          | 4   | 8.7                                             | 362                      | 63     |     |
| gynaecological disorders                         | 1                                       | 134   | 74    | 33    | 9          | 50  | 7.7                                             | 4291                     | 667    |     |
| neurological disorders                           | 42                                      | 26    | 27    | 23    | 43         | 32  | 14                                              | 2726                     | 415    |     |
| psychiatric disorders                            | 3                                       | 7     | 5     | 10    | 2          | 6   | 16.1                                            | 478                      | 72     |     |
| <b>eye ailment</b>                               |                                         |       |       |       |            |     |                                                 |                          |        |     |
| conjunctivitis                                   | 1                                       | 2     | 1     | 5     | 2          | 2   | 7.1                                             | 173                      | 24     |     |
| glaucoma                                         | 0                                       | 1     | 2     | 6     | 26         | 7   | 3.9                                             | 618                      | 50     |     |
| cataract                                         | 0                                       | 2     | 5     | 30    | 78         | 24  | 4.3                                             | 2040                     | 304    |     |
| diseases of skin                                 | 4                                       | 8     | 9     | 8     | 1          | 6   | 10.5                                            | 514                      | 67     |     |
| goitre                                           | 0                                       | 1     | 4     | 1     | 0          | 1   | 11.9                                            | 122                      | 15     |     |
| diabetes mellitus                                | 0                                       | 3     | 10    | 47    | 53         | 24  | 9.2                                             | 2013                     | 277    |     |
| under-nutrition                                  | 7                                       | 1     | 0     | 0     | 1          | 2   | 7.2                                             | 142                      | 15     |     |
| anaemia                                          | 6                                       | 10    | 23    | 10    | 4          | 11  | 5                                               | 908                      | 105    |     |
| sexually transmitted diseases                    | 0                                       | 1     | 1     | 1     | 0          | 1   | 5.8                                             | 47                       | 13     |     |
| <b>febrile illness</b>                           |                                         |       |       |       |            |     |                                                 |                          |        |     |
| malaria                                          | 54                                      | 52    | 53    | 21    | 5          | 36  | 5.7                                             | 3092                     | 441    |     |
| eruptive                                         | 2                                       | 1     | 1     | 1     | 0          | 1   | 5.7                                             | 77                       | 14     |     |
| mumps                                            | 1                                       | 1     | 0     | 0     | 0          | 0   | 7.6                                             | 24                       | 6      |     |
| diphtheria                                       | 12                                      | 6     | 0     | 4     | 0          | 4   | 5.6                                             | 373                      | 20     |     |
| whooping cough                                   | 23                                      | 1     | 3     | 1     | 3          | 6   | 5.2                                             | 499                      | 66     |     |
| fever of unknown origin                          | 149                                     | 85    | 56    | 32    | 28         | 67  | 6.1                                             | 5744                     | 770    |     |
| tetanus                                          | 4                                       | 2     | 0     | 1     | 3          | 2   | 15.2                                            | 169                      | 12     |     |
| filariasis/elephantiasis                         | 2                                       | 1     | 1     | 2     | 1          | 1   | 7.9                                             | 108                      | 20     |     |
| <b>disability</b>                                |                                         |       |       |       |            |     |                                                 |                          |        |     |
| locomotor                                        | 5                                       | 3     | 5     | 10    | 19         | 9   | 13.2                                            | 733                      | 126    |     |
| visual including blindness (excluding cataract)  | 1                                       | 2     | 0     | 5     | 6          | 3   | 7.8                                             | 255                      | 39     |     |
| speech                                           | 0                                       | 0     | 0     | 1     | 0          | 0   | 11.9                                            | 21                       | 4      |     |
| hearing                                          | 1                                       | 0     | 1     | 1     | 1          | 1   | 10.8                                            | 77                       | 11     |     |

Continued

Table (22): Per 1000 distribution of hospitalised cases during last 365 days by nature of ailment for different age-groups and sex

| nature of ailment                                | hospitalised cases by age of the person |       |       |       |            |       | average duration of stay per case (in 0.0 days) | cases of hospitalisation |        |
|--------------------------------------------------|-----------------------------------------|-------|-------|-------|------------|-------|-------------------------------------------------|--------------------------|--------|
|                                                  | 0-14                                    | 15-29 | 30-44 | 45-59 | 60 & above | all   |                                                 | estd. no. (00)           | sample |
|                                                  | (2)                                     | (3)   | (4)   | (5)   | (6)        | (7)   |                                                 |                          |        |
| diseases of mouth/teeth/gum                      | 2                                       | 2     | 1     | 4     | 0          | 2     | 9.4                                             | 145                      | 30     |
| accidents/ injuries/ burns/ fractures/ poisoning | 93                                      | 106   | 103   | 80    | 59         | 88    | 13.2                                            | 7473                     | 1065   |
| cancer and other tumours                         | 10                                      | 24    | 36    | 47    | 39         | 32    | 14.8                                            | 2724                     | 317    |
| other diagnosed ailments                         | 179                                     | 211   | 176   | 156   | 110        | 166   | 8.1                                             | 14097                    | 1984   |
| other undiagnosed ailments                       | 16                                      | 17    | 25    | 6     | 10         | 15    | 7.3                                             | 1248                     | 178    |
| n.r.                                             | 1                                       | 1     | 3     | 0     | 5          | 2     | 5.6                                             | 185                      | 29     |
| total                                            | 1000                                    | 1000  | 1000  | 1000  | 1000       | 1000  | 8.6                                             | 85172                    | 12131  |
| estd. no. of hosp. cases(00)                     | 15357                                   | 16629 | 17542 | 17935 | 17709      | 85172 | X                                               | X                        | X      |
| sample hosp. cases                               | 2140                                    | 2397  | 2533  | 2637  | 2424       | 12131 | X                                               | X                        | X      |

Table (22): Per 1000 distribution of hospitalised cases during last 365 days by nature of ailment for different age-groups and sex

| nature of ailment                                | Rural + Urban                           |       |       |       |            |     | average duration of stay per case (in 0.0 days) | Males                    |        |
|--------------------------------------------------|-----------------------------------------|-------|-------|-------|------------|-----|-------------------------------------------------|--------------------------|--------|
|                                                  | hospitalised cases by age of the person |       |       |       |            |     |                                                 | cases of hospitalisation |        |
|                                                  | 0-14                                    | 15-29 | 30-44 | 45-59 | 60 & above | all |                                                 | estd. no. (00)           | sample |
| (1)                                              | (2)                                     | (3)   | (4)   | (5)   | (6)        | (7) | (8)                                             | (9)                      | (10)   |
| <b>gastro-intestinal</b>                         |                                         |       |       |       |            |     |                                                 |                          |        |
| diarrhoea/ dysentery                             | 152                                     | 65    | 54    | 33    | 29         | 69  | 4.9                                             | 9994                     | 1383   |
| gastritis/ gastric or peptic ulcer               | 14                                      | 57    | 57    | 51    | 34         | 41  | 8.4                                             | 5914                     | 885    |
| worm infestation                                 | 7                                       | 3     | 4     | 3     | 3          | 4   | 6                                               | 585                      | 81     |
| amoebiasis                                       | 6                                       | 3     | 3     | 1     | 3          | 3   | 10.5                                            | 488                      | 65     |
| hepatitis/ jaundice                              | 29                                      | 46    | 16    | 13    | 8          | 22  | 8.8                                             | 3140                     | 410    |
| <b>cardio-vascular diseases</b>                  |                                         |       |       |       |            |     |                                                 |                          |        |
| heart disease                                    | 11                                      | 18    | 41    | 118   | 118        | 61  | 10.2                                            | 8853                     | 1034   |
| hypertension                                     | 0                                       | 7     | 16    | 37    | 32         | 18  | 5.8                                             | 2645                     | 324    |
| respiratory including ear/ nose/ throat ailments | 93                                      | 22    | 13    | 19    | 24         | 37  | 6.5                                             | 5270                     | 470    |
| tuberculosis                                     | 6                                       | 18    | 58    | 51    | 32         | 32  | 16.3                                            | 4649                     | 596    |
| bronchial asthma                                 | 24                                      | 7     | 19    | 40    | 101        | 39  | 7.7                                             | 5623                     | 576    |
| disorders of joints and bones                    | 18                                      | 21    | 26    | 32    | 29         | 25  | 14.4                                            | 3584                     | 429    |
| diseases of kidney/ urinary system               | 31                                      | 38    | 69    | 56    | 82         | 55  | 10                                              | 7894                     | 965    |
| prostatic disorders                              | 2                                       | 3     | 4     | 6     | 12         | 6   | 9.8                                             | 807                      | 124    |
| gynaecological disorders                         | 0                                       | 5     | 2     | 1     | 0          | 1   | 6.7                                             | 203                      | 24     |
| neurological disorders                           | 33                                      | 45    | 26    | 31    | 44         | 35  | 14.3                                            | 5084                     | 615    |
| psychiatric disorders                            | 2                                       | 18    | 14    | 13    | 7          | 10  | 16.7                                            | 1476                     | 162    |
| <b>eye ailment</b>                               |                                         |       |       |       |            |     |                                                 |                          |        |
| conjunctivitis                                   | 3                                       | 2     | 1     | 3     | 4          | 2   | 5.6                                             | 360                      | 47     |
| glaucoma                                         | 1                                       | 1     | 1     | 10    | 11         | 5   | 6.2                                             | 699                      | 71     |
| cataract                                         | 1                                       | 1     | 2     | 37    | 73         | 23  | 4.6                                             | 3301                     | 414    |
| diseases of skin                                 | 3                                       | 5     | 9     | 6     | 7          | 6   | 10.8                                            | 849                      | 102    |
| goitre                                           | 1                                       | 0     | 2     | 0     | 0          | 1   | 9.6                                             | 97                       | 12     |
| diabetes mellitus                                | 0                                       | 5     | 9     | 31    | 43         | 18  | 11.4                                            | 2543                     | 292    |
| under-nutrition                                  | 2                                       | 0     | 0     | 0     | 2          | 1   | 7.3                                             | 132                      | 16     |
| anaemia                                          | 9                                       | 6     | 11    | 8     | 3          | 7   | 8.4                                             | 1031                     | 105    |
| sexually transmitted diseases                    | 0                                       | 1     | 1     | 1     | 0          | 0   | 20.5                                            | 60                       | 12     |
| <b>febrile illness</b>                           |                                         |       |       |       |            |     |                                                 |                          |        |
| malaria                                          | 47                                      | 58    | 49    | 24    | 9          | 37  | 5.6                                             | 5280                     | 713    |
| eruptive                                         | 3                                       | 0     | 1     | 1     | 2          | 2   | 7.3                                             | 228                      | 20     |
| mumps                                            | 1                                       | 0     | 0     | 0     | 0          | 0   | 5.4                                             | 65                       | 13     |
| diphtheria                                       | 2                                       | 4     | 0     | 4     | 0          | 2   | 6.4                                             | 298                      | 24     |
| whooping cough                                   | 19                                      | 4     | 1     | 5     | 7          | 8   | 4.9                                             | 1128                     | 110    |
| fever of unknown origin                          | 156                                     | 82    | 61    | 45    | 37         | 79  | 6.3                                             | 11358                    | 1208   |
| tetanus                                          | 9                                       | 3     | 2     | 2     | 2          | 4   | 15.9                                            | 569                      | 42     |
| filariasis/elephantiasis                         | 1                                       | 1     | 2     | 1     | 2          | 1   | 7.7                                             | 205                      | 29     |
| <b>disability</b>                                |                                         |       |       |       |            |     |                                                 |                          |        |
| locomotor                                        | 19                                      | 10    | 14    | 12    | 19         | 15  | 13.2                                            | 2144                     | 271    |
| visual including blindness (excluding cataract)  | 1                                       | 3     | 1     | 4     | 9          | 4   | 6.5                                             | 527                      | 76     |
| speech                                           | 1                                       | 0     | 0     | 0     | 0          | 0   | 12.5                                            | 25                       | 4      |
| hearing                                          | 2                                       | 3     | 2     | 2     | 1          | 2   | 6.6                                             | 278                      | 27     |

Continued



Table (22): Per 1000 distribution of hospitalised cases during last 365 days by nature of ailment for different age-groups and sex

| nature of ailment                                | hospitalised cases by age of the person |       |       |       |            |        | average duration of stay per case (in 0.0 days) | cases of hospitalisation |        |
|--------------------------------------------------|-----------------------------------------|-------|-------|-------|------------|--------|-------------------------------------------------|--------------------------|--------|
|                                                  | 0-14                                    | 15-29 | 30-44 | 45-59 | 60 & above | all    |                                                 | estd. no. (00)           | sample |
|                                                  | (2)                                     | (3)   | (4)   | (5)   | (6)        | (7)    |                                                 |                          |        |
| diseases of mouth/teeth/gum                      | 1                                       | 1     | 2     | 5     | 1          | 2      | 7.9                                             | 320                      | 47     |
| accidents/ injuries/ burns/ fractures/ poisoning | 98                                      | 193   | 187   | 123   | 67         | 130    | 13.6                                            | 18703                    | 2267   |
| cancer and other tumours                         | 7                                       | 34    | 24    | 30    | 20         | 22     | 13.3                                            | 3232                     | 318    |
| other diagnosed ailments                         | 165                                     | 189   | 177   | 133   | 103        | 152    | 9.2                                             | 21925                    | 2612   |
| other undiagnosed ailments                       | 20                                      | 18    | 16    | 8     | 16         | 16     | 9.1                                             | 2242                     | 273    |
| n.r.                                             | 1                                       | 1     | 1     | 1     | 5          | 2      | 7.6                                             | 228                      | 38     |
| total                                            | 1000                                    | 1000  | 1000  | 1000  | 1000       | 1000   | 9.6                                             | 144038                   | 17306  |
| estd. no. of hosp. cases(00)                     | 33663                                   | 24423 | 27159 | 29555 | 29238      | 144038 | X                                               | X                        | X      |
| sample hosp. cases                               | 3860                                    | 3011  | 3347  | 3648  | 3440       | 17306  | X                                               | X                        | X      |

Table (22): Per 1000 distribution of hospitalised cases during last 365 days by nature of ailment for different age-groups and sex

| nature of ailment                                | Rural + Urban                           |       |       |       |            |     | Females                                         |                          |        |
|--------------------------------------------------|-----------------------------------------|-------|-------|-------|------------|-----|-------------------------------------------------|--------------------------|--------|
|                                                  | hospitalised cases by age of the person |       |       |       |            |     | average duration of stay per case (in 0.0 days) | cases of hospitalisation |        |
|                                                  | 0-14                                    | 15-29 | 30-44 | 45-59 | 60 & above | all |                                                 | estd. no. (00)           | sample |
| (1)                                              | (2)                                     | (3)   | (4)   | (5)   | (6)        | (7) | (8)                                             | (9)                      | (10)   |
| <b>gastro-intestinal</b>                         |                                         |       |       |       |            |     |                                                 |                          |        |
| diarrhoea/ dysentery                             | 181                                     | 56    | 50    | 61    | 52         | 74  | 4.4                                             | 9506                     | 1272   |
| gastritis/ gastric or peptic ulcer               | 20                                      | 53    | 64    | 63    | 43         | 50  | 7.6                                             | 6449                     | 796    |
| worm infestation                                 | 11                                      | 2     | 4     | 3     | 1          | 4   | 5.9                                             | 519                      | 83     |
| amoebiasis                                       | 7                                       | 2     | 4     | 1     | 4          | 3   | 6.1                                             | 416                      | 53     |
| hepatitis/ jaundice                              | 35                                      | 10    | 9     | 4     | 4          | 11  | 8.1                                             | 1457                     | 226    |
| <b>cardio-vascular diseases</b>                  |                                         |       |       |       |            |     |                                                 |                          |        |
| heart disease                                    | 9                                       | 20    | 41    | 68    | 96         | 46  | 9.4                                             | 5936                     | 702    |
| hypertension                                     | 0                                       | 11    | 23    | 47    | 55         | 27  | 7.5                                             | 3480                     | 391    |
| respiratory including ear/ nose/ throat ailments | 73                                      | 25    | 13    | 20    | 28         | 29  | 7.3                                             | 3748                     | 394    |
| tuberculosis                                     | 10                                      | 20    | 18    | 34    | 14         | 20  | 17.3                                            | 2513                     | 324    |
| bronchial asthma                                 | 18                                      | 9     | 20    | 38    | 49         | 26  | 9.6                                             | 3343                     | 378    |
| disorders of joints and bones                    | 11                                      | 13    | 23    | 38    | 42         | 25  | 10.7                                            | 3210                     | 360    |
| diseases of kidney/ urinary system               | 16                                      | 19    | 32    | 27    | 30         | 25  | 8.9                                             | 3193                     | 461    |
| prostatic disorders                              | 1                                       | 2     | 3     | 2     | 0          | 2   | 8.4                                             | 238                      | 35     |
| gynaecological disorders                         | 1                                       | 240   | 153   | 68    | 16         | 108 | 8.2                                             | 13763                    | 1795   |
| neurological disorders                           | 28                                      | 22    | 30    | 25    | 34         | 28  | 9.3                                             | 3522                     | 442    |
| psychiatric disorders                            | 7                                       | 8     | 10    | 6     | 4          | 7   | 13                                              | 893                      | 105    |
| <b>eye ailment</b>                               |                                         |       |       |       |            |     |                                                 |                          |        |
| conjunctivitis                                   | 0                                       | 0     | 1     | 3     | 3          | 1   | 8.5                                             | 167                      | 31     |
| glaucoma                                         | 2                                       | 0     | 1     | 6     | 24         | 6   | 4.3                                             | 775                      | 72     |
| cataract                                         | 3                                       | 1     | 8     | 41    | 118        | 32  | 4.7                                             | 4085                     | 461    |
| diseases of skin                                 | 9                                       | 4     | 9     | 3     | 5          | 6   | 22.2                                            | 767                      | 83     |
| goitre                                           | 2                                       | 1     | 1     | 1     | 1          | 1   | 8.5                                             | 161                      | 21     |
| diabetes mellitus                                | 9                                       | 1     | 8     | 49    | 46         | 22  | 8.6                                             | 2766                     | 251    |
| under-nutrition                                  | 6                                       | 1     | 0     | 0     | 1          | 1   | 9                                               | 172                      | 19     |
| anaemia                                          | 8                                       | 13    | 17    | 12    | 6          | 12  | 6.3                                             | 1515                     | 197    |
| sexually transmitted diseases                    | 0                                       | 3     | 5     | 2     | 0          | 2   | 7.6                                             | 292                      | 43     |
| <b>febrile illness</b>                           |                                         |       |       |       |            |     |                                                 |                          |        |
| malaria                                          | 48                                      | 34    | 29    | 26    | 9          | 29  | 6.9                                             | 3690                     | 550    |
| eruptive                                         | 3                                       | 1     | 11    | 0     | 1          | 3   | 3.1                                             | 441                      | 19     |
| mumps                                            | 2                                       | 1     | 0     | 2     | 0          | 1   | 4.6                                             | 112                      | 12     |
| diphtheria                                       | 14                                      | 0     | 2     | 0     | 0          | 3   | 4.5                                             | 339                      | 22     |
| whooping cough                                   | 13                                      | 2     | 4     | 2     | 4          | 5   | 7.9                                             | 583                      | 58     |
| fever of unknown origin                          | 152                                     | 71    | 59    | 54    | 39         | 71  | 6.4                                             | 9129                     | 955    |
| tetanus                                          | 4                                       | 2     | 0     | 0     | 0          | 1   | 9.9                                             | 145                      | 18     |
| filariasis/elephantiasis                         | 0                                       | 0     | 2     | 2     | 1          | 1   | 8                                               | 147                      | 26     |
| <b>disability</b>                                |                                         |       |       |       |            |     |                                                 |                          |        |
| locomotor                                        | 9                                       | 4     | 4     | 10    | 18         | 8   | 11.8                                            | 1083                     | 140    |
| visual including blindness (excluding cataract)  | 1                                       | 1     | 1     | 7     | 11         | 4   | 9.2                                             | 503                      | 73     |
| speech                                           | 1                                       | 3     | 0     | 1     | 0          | 1   | 9.9                                             | 129                      | 7      |
| hearing                                          | 1                                       | 1     | 1     | 2     | 0          | 1   | 5.9                                             | 122                      | 16     |

Continued

Table (22): Per 1000 distribution of hospitalised cases during last 365 days by nature of ailment for different age-groups and sex

| nature of ailment                                | Rural + Urban                           |       |       |       |            |        | average duration of stay per case (in 0.0 days) | Females                  |        |
|--------------------------------------------------|-----------------------------------------|-------|-------|-------|------------|--------|-------------------------------------------------|--------------------------|--------|
|                                                  | hospitalised cases by age of the person |       |       |       |            |        |                                                 | cases of hospitalisation |        |
|                                                  | 0-14                                    | 15-29 | 30-44 | 45-59 | 60 & above | all    |                                                 | estd. no. (00)           | sample |
| (1)                                              | (2)                                     | (3)   | (4)   | (5)   | (6)        | (7)    | (8)                                             | (9)                      | (10)   |
| diseases of mouth/teeth/gum                      | 2                                       | 2     | 2     | 5     | 0          | 2      | 13.3                                            | 289                      | 44     |
| accidents/ injuries/ burns/ fractures/ poisoning | 91                                      | 48    | 52    | 53    | 66         | 60     | 10.1                                            | 7619                     | 852    |
| cancer and other tumours                         | 11                                      | 24    | 49    | 53    | 43         | 37     | 16.1                                            | 4745                     | 534    |
| other diagnosed ailments                         | 153                                     | 243   | 204   | 148   | 119        | 178    | 8.2                                             | 22794                    | 2670   |
| other undiagnosed ailments                       | 22                                      | 22    | 30    | 13    | 12         | 20     | 7.3                                             | 2589                     | 332    |
| n.r.                                             | 8                                       | 2     | 4     | 0     | 1          | 3      | 112.3                                           | 359                      | 36     |
| total                                            | 1000                                    | 1000  | 1000  | 1000  | 1000       | 1000   | 8.7                                             | 127704                   | 15359  |
| estd. no. of hosp. cases(00)                     | 19942                                   | 29476 | 29636 | 26016 | 22633      | 127704 | X                                               | X                        | X      |
| sample hosp. cases                               | 2247                                    | 3652  | 3833  | 3141  | 2486       | 15359  | X                                               | X                        | X      |

Table (22): Per 1000 distribution of hospitalised cases during last 365 days by nature of ailment for different age-groups and sex

| nature of ailment                                | Rural + Urban                           |       |       |       |            |     | average duration of stay per case (in 0.0 days) | Persons                  |        |
|--------------------------------------------------|-----------------------------------------|-------|-------|-------|------------|-----|-------------------------------------------------|--------------------------|--------|
|                                                  | hospitalised cases by age of the person |       |       |       |            |     |                                                 | cases of hospitalisation |        |
|                                                  | 0-14                                    | 15-29 | 30-44 | 45-59 | 60 & above | all |                                                 | estd. no. (00)           | sample |
| (1)                                              | (2)                                     | (3)   | (4)   | (5)   | (6)        | (7) | (8)                                             | (9)                      | (10)   |
| <b>gastro-intestinal</b>                         |                                         |       |       |       |            |     |                                                 |                          |        |
| diarrhoea/ dysentery                             | 163                                     | 60    | 52    | 46    | 39         | 72  | 4.7                                             | 19500                    | 2655   |
| gastritis/ gastric or peptic ulcer               | 16                                      | 54    | 61    | 57    | 38         | 45  | 8                                               | 12363                    | 1681   |
| worm infestation                                 | 9                                       | 2     | 4     | 3     | 2          | 4   | 6                                               | 1103                     | 164    |
| amoebiasis                                       | 6                                       | 2     | 4     | 1     | 3          | 3   | 8.5                                             | 904                      | 118    |
| hepatitis/ jaundice                              | 31                                      | 26    | 12    | 9     | 6          | 17  | 8.6                                             | 4597                     | 636    |
| <b>cardio-vascular diseases</b>                  |                                         |       |       |       |            |     |                                                 |                          |        |
| heart disease                                    | 10                                      | 19    | 41    | 95    | 109        | 54  | 9.9                                             | 14789                    | 1736   |
| hypertension                                     | 0                                       | 9     | 20    | 42    | 42         | 23  | 6.8                                             | 6125                     | 715    |
| respiratory including ear/ nose/ throat ailments | 86                                      | 24    | 13    | 19    | 26         | 33  | 6.9                                             | 9018                     | 864    |
| tuberculosis                                     | 7                                       | 19    | 37    | 43    | 24         | 26  | 16.7                                            | 7162                     | 920    |
| bronchial asthma                                 | 22                                      | 8     | 20    | 39    | 78         | 33  | 8.4                                             | 8966                     | 954    |
| disorders of joints and bones                    | 15                                      | 17    | 24    | 34    | 34         | 25  | 12.6                                            | 6794                     | 789    |
| diseases of kidney/ urinary system               | 26                                      | 28    | 50    | 42    | 59         | 41  | 9.7                                             | 11087                    | 1426   |
| prostatic disorders                              | 2                                       | 3     | 4     | 4     | 7          | 4   | 9.5                                             | 1046                     | 159    |
| gynaecological disorders                         | 1                                       | 134   | 81    | 32    | 7          | 51  | 8.2                                             | 13967                    | 1819   |
| neurological disorders                           | 31                                      | 32    | 28    | 28    | 40         | 32  | 12.3                                            | 8606                     | 1057   |
| psychiatric disorders                            | 4                                       | 12    | 12    | 9     | 6          | 9   | 15.3                                            | 2369                     | 267    |
| <b>eye ailment</b>                               |                                         |       |       |       |            |     |                                                 |                          |        |
| conjunctivitis                                   | 2                                       | 1     | 1     | 3     | 4          | 2   | 6.5                                             | 527                      | 78     |
| glaucoma                                         | 1                                       | 1     | 1     | 8     | 16         | 5   | 5.2                                             | 1474                     | 143    |
| cataract                                         | 2                                       | 1     | 5     | 39    | 92         | 27  | 4.7                                             | 7386                     | 875    |
| diseases of skin                                 | 6                                       | 5     | 9     | 5     | 6          | 6   | 16.2                                            | 1616                     | 185    |
| goitre                                           | 1                                       | 1     | 1     | 1     | 0          | 1   | 8.9                                             | 258                      | 33     |
| diabetes mellitus                                | 4                                       | 3     | 9     | 39    | 44         | 20  | 9.9                                             | 5309                     | 543    |
| under-nutrition                                  | 3                                       | 1     | 0     | 0     | 1          | 1   | 8.3                                             | 304                      | 35     |
| anaemia                                          | 8                                       | 10    | 14    | 10    | 4          | 9   | 7.2                                             | 2546                     | 302    |
| sexually transmitted diseases                    | 0                                       | 2     | 3     | 1     | 0          | 1   | 9.8                                             | 352                      | 55     |
| <b>febrile illness</b>                           |                                         |       |       |       |            |     |                                                 |                          |        |
| malaria                                          | 47                                      | 45    | 38    | 25    | 9          | 33  | 6.1                                             | 8970                     | 1263   |
| eruptive                                         | 3                                       | 1     | 6     | 0     | 2          | 2   | 4.5                                             | 669                      | 39     |
| mumps                                            | 2                                       | 1     | 0     | 1     | 0          | 1   | 4.9                                             | 177                      | 25     |
| diphtheria                                       | 7                                       | 2     | 1     | 2     | 0          | 2   | 5.4                                             | 636                      | 46     |
| whooping cough                                   | 17                                      | 3     | 3     | 4     | 6          | 6   | 5.9                                             | 1711                     | 168    |
| fever of unknown origin                          | 155                                     | 76    | 60    | 49    | 38         | 75  | 6.3                                             | 20487                    | 2163   |
| tetanus                                          | 7                                       | 2     | 1     | 1     | 1          | 3   | 14.7                                            | 714                      | 60     |
| filariasis/elephantiasis                         | 1                                       | 1     | 2     | 1     | 2          | 1   | 7.9                                             | 351                      | 55     |
| <b>disability</b>                                |                                         |       |       |       |            |     |                                                 |                          |        |
| locomotor                                        | 15                                      | 7     | 9     | 11    | 18         | 12  | 12.8                                            | 3226                     | 411    |
| visual including blindness (excluding cataract)  | 1                                       | 2     | 1     | 6     | 10         | 4   | 7.8                                             | 1030                     | 149    |
| speech                                           | 1                                       | 2     | 0     | 0     | 0          | 1   | 10.4                                            | 154                      | 11     |
| hearing                                          | 2                                       | 2     | 1     | 2     | 0          | 1   | 6.4                                             | 400                      | 43     |

Continued

Table (22): Per 1000 distribution of hospitalised cases during last 365 days by nature of ailment for different age-groups and sex

| nature of ailment                                | Rural + Urban                           |       |       |       |            |        | average duration of stay per case (in 0.0 days) | Persons                  |                |        |
|--------------------------------------------------|-----------------------------------------|-------|-------|-------|------------|--------|-------------------------------------------------|--------------------------|----------------|--------|
|                                                  | hospitalised cases by age of the person |       |       |       |            |        |                                                 | cases of hospitalisation | estd. no. (00) | sample |
|                                                  | 0-14                                    | 15-29 | 30-44 | 45-59 | 60 & above | all    |                                                 |                          |                |        |
| (1)                                              | (2)                                     | (3)   | (4)   | (5)   | (6)        | (7)    | (8)                                             | (9)                      | (10)           |        |
| diseases of mouth/teeth/gum                      | 2                                       | 2     | 2     | 5     | 1          | 2      | 10.4                                            | 609                      | 91             |        |
| accidents/ injuries/ burns/ fractures/ poisoning | 95                                      | 114   | 117   | 90    | 66         | 97     | 12.6                                            | 26322                    | 3119           |        |
| cancer and other tumours                         | 8                                       | 29    | 37    | 41    | 30         | 29     | 15                                              | 7977                     | 852            |        |
| other diagnosed ailments                         | 160                                     | 219   | 191   | 140   | 110        | 165    | 8.7                                             | 44719                    | 5282           |        |
| other undiagnosed ailments                       | 20                                      | 20    | 23    | 11    | 14         | 18     | 8.1                                             | 4831                     | 605            |        |
| n.r.                                             | 4                                       | 2     | 2     | 0     | 3          | 2      | 71.6                                            | 587                      | 74             |        |
| total                                            | 1000                                    | 1000  | 1000  | 1000  | 1000       | 1000   | 9.2                                             | 271741                   | 32665          |        |
| estd. no. of hosp. cases(00)                     | 53605                                   | 53900 | 56795 | 55571 | 51872      | 271741 | X                                               | X                        | X              |        |
| sample hosp. cases                               | 6107                                    | 6663  | 7180  | 6789  | 5926       | 32665  | X                                               | X                        | X              |        |

Table (23): Per 1000 distribution of hospitalisation cases by type of hospital and type of ward for each mpce class and sex

| All-India<br>mpce class       | Rural                              |                     |                        |           |                     |                     |                        |       | Males                    |                |        |
|-------------------------------|------------------------------------|---------------------|------------------------|-----------|---------------------|---------------------|------------------------|-------|--------------------------|----------------|--------|
|                               | type of hospital                   |                     |                        |           |                     |                     |                        |       | cases of hospitalisation |                |        |
|                               | public hospital+ public dispensary |                     |                        |           | private hospital    |                     |                        |       | total (incl. n.r. cases) | estd. no. (00) | sample |
|                               | type of ward                       |                     |                        |           | type of ward        |                     |                        |       |                          |                |        |
| free ward                     | paying general ward                | paying special ward | all (incl. n.r. cases) | free ward | paying general ward | paying special ward | all (incl. n.r. cases) |       |                          |                |        |
| (1)                           | (2)                                | (3)                 | (4)                    | (5)       | (6)                 | (7)                 | (8)                    | (9)   | (10)                     | (11)           | (12)   |
| 0 – 225                       | 561                                | 35                  | 0                      | 596       | 37                  | 324                 | 39                     | 400   | 1000                     | 3080           | 427    |
| 225 – 255                     | 514                                | 69                  | 0                      | 583       | 13                  | 372                 | 30                     | 415   | 1000                     | 2130           | 304    |
| 255 – 300                     | 436                                | 93                  | 3                      | 532       | 32                  | 393                 | 40                     | 465   | 1000                     | 5692           | 764    |
| 300 – 340                     | 439                                | 52                  | 0                      | 491       | 41                  | 389                 | 76                     | 506   | 1000                     | 6401           | 787    |
| 340 – 380                     | 396                                | 59                  | 9                      | 464       | 58                  | 431                 | 46                     | 536   | 1000                     | 7313           | 848    |
| 380 – 420                     | 477                                | 39                  | 3                      | 520       | 14                  | 402                 | 64                     | 479   | 1000                     | 9633           | 1007   |
| 420 – 470                     | 366                                | 98                  | 7                      | 472       | 15                  | 430                 | 83                     | 527   | 1000                     | 8529           | 1038   |
| 470 – 525                     | 375                                | 88                  | 6                      | 469       | 34                  | 414                 | 81                     | 530   | 1000                     | 10480          | 1202   |
| 525 – 615                     | 349                                | 45                  | 4                      | 398       | 29                  | 470                 | 101                    | 600   | 1000                     | 12360          | 1354   |
| 615 – 775                     | 264                                | 67                  | 4                      | 336       | 19                  | 555                 | 90                     | 664   | 1000                     | 14954          | 1484   |
| 775 – 950                     | 268                                | 51                  | 19                     | 338       | 15                  | 507                 | 139                    | 662   | 1000                     | 7186           | 760    |
| 950 +                         | 161                                | 61                  | 15                     | 236       | 3                   | 501                 | 260                    | 764   | 1000                     | 11533          | 992    |
| all                           | 350                                | 64                  | 7                      | 420       | 24                  | 454                 | 101                    | 579   | 1000                     | 99290          | 10967  |
| estd. no. of hosp. cases (00) | 34712                              | 6308                | 661                    | 41690     | 2408                | 45084               | 10000                  | 57491 | 99290                    | X              | X      |
| sample no. of hosp. cases     | 4434                               | 784                 | 69                     | 5291      | 273                 | 4583                | 798                    | 5654  | 10967                    | X              | X      |

Table (23): Per 1000 distribution of hospitalisation cases by type of hospital and type of ward for each mpce class and sex

| All-India<br>mpce class       | Rural                              |                     |                        |           |                     |                     |                        |       | Females                  |                |        |
|-------------------------------|------------------------------------|---------------------|------------------------|-----------|---------------------|---------------------|------------------------|-------|--------------------------|----------------|--------|
|                               | type of hospital                   |                     |                        |           |                     |                     |                        |       | cases of hospitalisation |                |        |
|                               | public hospital+ public dispensary |                     |                        |           | private hospital    |                     |                        |       | total (incl. n.r. cases) | estd. no. (00) | sample |
|                               | type of ward                       |                     |                        |           | type of ward        |                     |                        |       |                          |                |        |
| free ward                     | paying general ward                | paying special ward | all (incl. n.r. cases) | free ward | paying general ward | paying special ward | all (incl. n.r. cases) |       |                          |                |        |
| (1)                           | (2)                                | (3)                 | (4)                    | (5)       | (6)                 | (7)                 | (8)                    | (9)   | (10)                     | (11)           | (12)   |
| 0 – 225                       | 558                                | 64                  | 1                      | 676       | 50                  | 235                 | 11                     | 297   | 1000                     | 2872           | 331    |
| 225 – 255                     | 507                                | 37                  | 0                      | 544       | 16                  | 401                 | 39                     | 456   | 1000                     | 2563           | 267    |
| 255 – 300                     | 479                                | 63                  | 1                      | 543       | 30                  | 394                 | 31                     | 455   | 1000                     | 4744           | 632    |
| 300 – 340                     | 440                                | 51                  | 0                      | 492       | 40                  | 432                 | 27                     | 499   | 1000                     | 5145           | 638    |
| 340 – 380                     | 424                                | 84                  | 2                      | 510       | 44                  | 423                 | 21                     | 488   | 1000                     | 6206           | 723    |
| 380 – 420                     | 437                                | 69                  | 3                      | 508       | 23                  | 407                 | 61                     | 492   | 1000                     | 7597           | 879    |
| 420 – 470                     | 331                                | 69                  | 2                      | 402       | 31                  | 499                 | 66                     | 597   | 1000                     | 8211           | 939    |
| 470 – 525                     | 368                                | 46                  | 2                      | 416       | 29                  | 459                 | 96                     | 584   | 1000                     | 10220          | 1127   |
| 525 – 615                     | 341                                | 48                  | 3                      | 392       | 20                  | 501                 | 83                     | 605   | 1000                     | 10177          | 1129   |
| 615 – 775                     | 265                                | 60                  | 3                      | 328       | 15                  | 504                 | 153                    | 672   | 1000                     | 12654          | 1301   |
| 775 – 950                     | 283                                | 45                  | 13                     | 341       | 39                  | 479                 | 141                    | 659   | 1000                     | 7000           | 706    |
| 950 +                         | 188                                | 48                  | 16                     | 252       | 16                  | 427                 | 305                    | 748   | 1000                     | 9891           | 895    |
| all                           | 350                                | 57                  | 4                      | 413       | 27                  | 451                 | 107                    | 585   | 1000                     | 87280          | 9567   |
| estd. no. of hosp. cases (00) | 30521                              | 4958                | 379                    | 36022     | 2360                | 39367               | 9335                   | 51064 | 87280                    | X              | X      |
| sample no. of hosp. cases     | 3827                               | 625                 | 41                     | 4500      | 232                 | 4052                | 762                    | 5047  | 9567                     | X              | X      |

Table (23): Per 1000 distribution of hospitalisation cases by type of hospital and type of ward for each mpce class and sex

| All-India<br>mpce class       | Rural                              |                     |                        |           |                     |                     |                        |        | Persons                  |                |        |
|-------------------------------|------------------------------------|---------------------|------------------------|-----------|---------------------|---------------------|------------------------|--------|--------------------------|----------------|--------|
|                               | type of hospital                   |                     |                        |           |                     |                     |                        |        | cases of hospitalisation |                |        |
|                               | public hospital+ public dispensary |                     |                        |           | private hospital    |                     |                        |        | total (incl. n.r. cases) | estd. no. (00) | sample |
|                               | type of ward                       |                     |                        |           | type of ward        |                     |                        |        |                          |                |        |
| free ward                     | paying general ward                | paying special ward | all (incl. n.r. cases) | free ward | paying general ward | paying special ward | all (incl. n.r. cases) |        |                          |                |        |
| (1)                           | (2)                                | (3)                 | (4)                    | (5)       | (6)                 | (7)                 | (8)                    | (9)    | (10)                     | (11)           | (12)   |
| 0 – 225                       | 560                                | 49                  | 1                      | 635       | 43                  | 281                 | 26                     | 350    | 1000                     | 5952           | 758    |
| 225 – 255                     | 510                                | 52                  | 0                      | 562       | 15                  | 388                 | 35                     | 437    | 1000                     | 4693           | 571    |
| 255 – 300                     | 456                                | 79                  | 2                      | 537       | 31                  | 393                 | 36                     | 461    | 1000                     | 10436          | 1396   |
| 300 – 340                     | 439                                | 51                  | 0                      | 491       | 41                  | 408                 | 54                     | 503    | 1000                     | 11546          | 1425   |
| 340 – 380                     | 409                                | 71                  | 6                      | 485       | 52                  | 428                 | 35                     | 514    | 1000                     | 13519          | 1571   |
| 380 – 420                     | 460                                | 52                  | 3                      | 515       | 18                  | 404                 | 63                     | 485    | 1000                     | 17230          | 1886   |
| 420 – 470                     | 349                                | 84                  | 5                      | 438       | 23                  | 464                 | 75                     | 561    | 1000                     | 16740          | 1977   |
| 470 – 525                     | 371                                | 67                  | 4                      | 443       | 31                  | 437                 | 89                     | 557    | 1000                     | 20700          | 2329   |
| 525 – 615                     | 345                                | 46                  | 3                      | 395       | 25                  | 484                 | 93                     | 602    | 1000                     | 22538          | 2483   |
| 615 – 775                     | 264                                | 64                  | 4                      | 332       | 17                  | 532                 | 119                    | 668    | 1000                     | 27607          | 2785   |
| 775 – 950                     | 275                                | 48                  | 16                     | 339       | 27                  | 493                 | 140                    | 660    | 1000                     | 14186          | 1466   |
| 950 +                         | 173                                | 55                  | 15                     | 244       | 9                   | 467                 | 281                    | 756    | 1000                     | 21424          | 1887   |
| all                           | 350                                | 60                  | 6                      | 417       | 26                  | 453                 | 104                    | 582    | 1000                     | 186570         | 20534  |
| estd. no. of hosp. cases (00) | 65233                              | 11266               | 1040                   | 77712     | 4767                | 84450               | 19334                  | 108555 | 186570                   | X              | X      |
| sample no. of hosp. cases     | 8261                               | 1409                | 110                    | 9791      | 505                 | 8635                | 1560                   | 10701  | 20534                    | X              | X      |



Table (23): Per 1000 distribution of hospitalisation cases by type of hospital and type of ward for each mpce class and sex

| mpce class                    | Urban                              |                     |                        |           |                     |                     |                        |       | Males                    |                |        |
|-------------------------------|------------------------------------|---------------------|------------------------|-----------|---------------------|---------------------|------------------------|-------|--------------------------|----------------|--------|
|                               | type of hospital                   |                     |                        |           |                     |                     |                        |       | cases of hospitalisation |                |        |
|                               | public hospital+ public dispensary |                     |                        |           | private hospital    |                     |                        |       | total (incl. n.r. cases) | estd. no. (00) | sample |
|                               | type of ward                       |                     |                        |           | type of ward        |                     |                        |       |                          |                |        |
| free ward                     | paying general ward                | paying special ward | all (incl. n.r. cases) | free ward | paying general ward | paying special ward | all (incl. n.r. cases) |       |                          |                |        |
| (1)                           | (2)                                | (3)                 | (4)                    | (5)       | (6)                 | (7)                 | (8)                    | (9)   | (10)                     | (11)           | (12)   |
| 0 – 300                       | 517                                | 56                  | 22                     | 595       | 7                   | 336                 | 61                     | 405   | 1000                     | 1257           | 180    |
| 300 – 350                     | 559                                | 50                  | 0                      | 610       | 4                   | 365                 | 22                     | 390   | 1000                     | 743            | 115    |
| 350 – 425                     | 490                                | 69                  | 6                      | 565       | 10                  | 356                 | 67                     | 435   | 1000                     | 2240           | 327    |
| 425 – 500                     | 452                                | 79                  | 1                      | 532       | 11                  | 413                 | 44                     | 468   | 1000                     | 4502           | 606    |
| 500 – 575                     | 387                                | 62                  | 15                     | 464       | 13                  | 366                 | 156                    | 536   | 1000                     | 2184           | 313    |
| 575 – 665                     | 307                                | 61                  | 21                     | 388       | 10                  | 516                 | 86                     | 612   | 1000                     | 3918           | 534    |
| 665 – 775                     | 323                                | 66                  | 4                      | 393       | 12                  | 496                 | 96                     | 605   | 1000                     | 5848           | 806    |
| 775 – 915                     | 316                                | 82                  | 7                      | 406       | 12                  | 413                 | 169                    | 594   | 1000                     | 4982           | 730    |
| 915 – 1120                    | 292                                | 53                  | 18                     | 363       | 12                  | 485                 | 140                    | 637   | 1000                     | 5424           | 838    |
| 1120 – 1500                   | 219                                | 69                  | 15                     | 303       | 13                  | 428                 | 256                    | 697   | 1000                     | 7520           | 1053   |
| 1500 – 1925                   | 168                                | 64                  | 13                     | 245       | 10                  | 360                 | 384                    | 755   | 1000                     | 2358           | 295    |
| 1925 +                        | 115                                | 62                  | 18                     | 196       | 10                  | 371                 | 424                    | 804   | 1000                     | 3771           | 542    |
| all                           | 308                                | 67                  | 12                     | 386       | 11                  | 430                 | 172                    | 614   | 1000                     | 44748          | 6339   |
| estd. no. of hosp. cases (00) | 13775                              | 2981                | 526                    | 17282     | 509                 | 19231               | 7709                   | 27458 | 44748                    | X              | X      |
| sample no. of hosp. cases     | 2269                               | 459                 | 68                     | 2798      | 99                  | 2536                | 900                    | 3537  | 6339                     | X              | X      |

Table (23): Per 1000 distribution of hospitalisation cases by type of hospital and type of ward for each mpce class and sex

| mpce class                    | Urban                              |                     |                        |           |                     |                     |                        |       | Females                  |                |        |
|-------------------------------|------------------------------------|---------------------|------------------------|-----------|---------------------|---------------------|------------------------|-------|--------------------------|----------------|--------|
|                               | type of hospital                   |                     |                        |           |                     |                     |                        |       | cases of hospitalisation |                |        |
|                               | public hospital+ public dispensary |                     |                        |           | private hospital    |                     |                        |       | total (incl. n.r. cases) | estd. no. (00) | sample |
|                               | type of ward                       |                     |                        |           | type of ward        |                     |                        |       |                          |                |        |
| free ward                     | paying general ward                | paying special ward | all (incl. n.r. cases) | free ward | paying general ward | paying special ward | all (incl. n.r. cases) |       |                          |                |        |
| (1)                           | (2)                                | (3)                 | (4)                    | (5)       | (6)                 | (7)                 | (8)                    | (9)   | (10)                     | (11)           | (12)   |
| 0 – 300                       | 435                                | 90                  | 31                     | 556       | 43                  | 326                 | 76                     | 444   | 1000                     | 890            | 130    |
| 300 – 350                     | 570                                | 14                  | 0                      | 584       | 20                  | 378                 | 18                     | 416   | 1000                     | 755            | 99     |
| 350 – 425                     | 483                                | 67                  | 13                     | 564       | 42                  | 361                 | 30                     | 436   | 1000                     | 2052           | 293    |
| 425 – 500                     | 460                                | 97                  | 1                      | 558       | 18                  | 374                 | 46                     | 438   | 1000                     | 3854           | 550    |
| 500 – 575                     | 496                                | 72                  | 22                     | 590       | 30                  | 327                 | 53                     | 410   | 1000                     | 2100           | 287    |
| 575 – 665                     | 326                                | 57                  | 1                      | 383       | 20                  | 504                 | 92                     | 616   | 1000                     | 4187           | 525    |
| 665 – 775                     | 366                                | 86                  | 6                      | 459       | 25                  | 414                 | 101                    | 541   | 1000                     | 4422           | 637    |
| 775 – 915                     | 285                                | 76                  | 15                     | 376       | 6                   | 486                 | 132                    | 624   | 1000                     | 4745           | 703    |
| 915 – 1120                    | 283                                | 65                  | 11                     | 360       | 28                  | 498                 | 115                    | 640   | 1000                     | 5611           | 834    |
| 1120 – 1500                   | 183                                | 63                  | 8                      | 254       | 15                  | 473                 | 259                    | 746   | 1000                     | 5769           | 870    |
| 1500 – 1925                   | 94                                 | 44                  | 17                     | 154       | 15                  | 475                 | 356                    | 846   | 1000                     | 2050           | 311    |
| 1925 +                        | 86                                 | 37                  | 22                     | 146       | 17                  | 362                 | 475                    | 854   | 1000                     | 3988           | 553    |
| all                           | 300                                | 67                  | 11                     | 378       | 21                  | 436                 | 165                    | 622   | 1000                     | 40424          | 5792   |
| estd. no. of hosp. cases (00) | 12140                              | 2697                | 444                    | 15282     | 840                 | 17631               | 6651                   | 25126 | 40424                    | X              | X      |
| sample no. of hosp. cases     | 1982                               | 416                 | 71                     | 2470      | 121                 | 2334                | 860                    | 3316  | 5792                     | X              | X      |

Table (23): Per 1000 distribution of hospitalisation cases by type of hospital and type of ward for each mpce class and sex

| mpce class                    | Urban                              |                     |                        |           |                     |                     |                        |       | Persons                  |                |        |
|-------------------------------|------------------------------------|---------------------|------------------------|-----------|---------------------|---------------------|------------------------|-------|--------------------------|----------------|--------|
|                               | type of hospital                   |                     |                        |           |                     |                     |                        |       | cases of hospitalisation |                |        |
|                               | public hospital+ public dispensary |                     |                        |           | private hospital    |                     |                        |       | total (incl. n.r. cases) | estd. no. (00) | sample |
|                               | type of ward                       |                     |                        |           | type of ward        |                     |                        |       |                          |                |        |
| free ward                     | paying general ward                | paying special ward | all (incl. n.r. cases) | free ward | paying general ward | paying special ward | all (incl. n.r. cases) |       |                          |                |        |
| (1)                           | (2)                                | (3)                 | (4)                    | (5)       | (6)                 | (7)                 | (8)                    | (9)   | (10)                     | (11)           | (12)   |
| 0 – 300                       | 483                                | 70                  | 26                     | 579       | 22                  | 332                 | 67                     | 421   | 1000                     | 2148           | 310    |
| 300 – 350                     | 565                                | 32                  | 0                      | 597       | 12                  | 372                 | 20                     | 403   | 1000                     | 1498           | 214    |
| 350 – 425                     | 487                                | 68                  | 9                      | 564       | 26                  | 359                 | 49                     | 435   | 1000                     | 4292           | 620    |
| 425 – 500                     | 456                                | 87                  | 1                      | 544       | 14                  | 395                 | 45                     | 455   | 1000                     | 8357           | 1156   |
| 500 – 575                     | 440                                | 67                  | 19                     | 526       | 21                  | 347                 | 106                    | 474   | 1000                     | 4284           | 600    |
| 575 – 665                     | 317                                | 59                  | 10                     | 386       | 15                  | 510                 | 89                     | 614   | 1000                     | 8105           | 1059   |
| 665 – 775                     | 342                                | 75                  | 5                      | 422       | 18                  | 461                 | 98                     | 578   | 1000                     | 10270          | 1443   |
| 775 – 915                     | 301                                | 79                  | 11                     | 391       | 9                   | 448                 | 151                    | 609   | 1000                     | 9727           | 1433   |
| 915 – 1120                    | 288                                | 59                  | 14                     | 361       | 20                  | 492                 | 127                    | 639   | 1000                     | 11035          | 1672   |
| 1120 – 1500                   | 203                                | 66                  | 12                     | 281       | 14                  | 447                 | 257                    | 719   | 1000                     | 13288          | 1923   |
| 1500 – 1925                   | 133                                | 55                  | 15                     | 203       | 12                  | 413                 | 371                    | 797   | 1000                     | 4408           | 606    |
| 1925 +                        | 100                                | 50                  | 20                     | 170       | 14                  | 366                 | 450                    | 830   | 1000                     | 7759           | 1095   |
| all                           | 304                                | 67                  | 11                     | 382       | 16                  | 433                 | 169                    | 617   | 1000                     | 85172          | 12131  |
| estd. no. of hosp. cases (00) | 25915                              | 5678                | 970                    | 32565     | 1349                | 36862               | 14360                  | 52585 | 85172                    | X              | X      |
| sample no. of hosp. cases     | 4251                               | 875                 | 139                    | 5268      | 220                 | 4870                | 1760                   | 6853  | 12131                    | X              | X      |

Table (23): Per 1000 distribution of hospitalisation cases by type of hospital and type of ward for each mpce class and sex

| mpce class                    | Rural + Urban                      |                     |                        |           |                     |                     |                        |       | Males                    |                |        |
|-------------------------------|------------------------------------|---------------------|------------------------|-----------|---------------------|---------------------|------------------------|-------|--------------------------|----------------|--------|
|                               | type of hospital                   |                     |                        |           |                     |                     |                        |       | cases of hospitalisation |                |        |
|                               | public hospital+ public dispensary |                     |                        |           | private hospital    |                     |                        |       | total (incl. n.r. cases) | estd. no. (00) | sample |
|                               | type of ward                       |                     |                        |           | type of ward        |                     |                        |       |                          |                |        |
| free ward                     | paying general ward                | paying special ward | all (incl. n.r. cases) | free ward | paying general ward | paying special ward | all (incl. n.r. cases) |       |                          |                |        |
| (1)                           | (2)                                | (3)                 | (4)                    | (5)       | (6)                 | (7)                 | (8)                    | (9)   | (10)                     | (11)           | (12)   |
| 0 – 235                       | 548                                | 41                  | 6                      | 596       | 28                  | 328                 | 45                     | 401   | 1000                     | 4338           | 607    |
| 235 – 265                     | 526                                | 64                  | 0                      | 590       | 11                  | 370                 | 28                     | 409   | 1000                     | 2873           | 419    |
| 265 – 320                     | 451                                | 86                  | 4                      | 541       | 26                  | 383                 | 48                     | 457   | 1000                     | 7932           | 1091   |
| 320 – 365                     | 445                                | 63                  | 0                      | 508       | 29                  | 399                 | 63                     | 491   | 1000                     | 10903          | 1393   |
| 365 – 410                     | 394                                | 60                  | 10                     | 464       | 48                  | 416                 | 71                     | 536   | 1000                     | 9497           | 1161   |
| 410 – 460                     | 428                                | 45                  | 8                      | 482       | 12                  | 435                 | 70                     | 518   | 1000                     | 13551          | 1541   |
| 460 – 520                     | 349                                | 85                  | 6                      | 440       | 14                  | 457                 | 88                     | 559   | 1000                     | 14377          | 1844   |
| 520 – 605                     | 356                                | 86                  | 6                      | 449       | 27                  | 414                 | 109                    | 550   | 1000                     | 15461          | 1932   |
| 605 – 730                     | 332                                | 47                  | 8                      | 387       | 24                  | 474                 | 113                    | 611   | 1000                     | 17784          | 2192   |
| 730 – 980                     | 249                                | 68                  | 8                      | 325       | 17                  | 513                 | 146                    | 675   | 1000                     | 22473          | 2537   |
| 980 – 1285                    | 244                                | 54                  | 18                     | 315       | 14                  | 471                 | 200                    | 685   | 1000                     | 9544           | 1055   |
| 1285 +                        | 150                                | 61                  | 16                     | 226       | 5                   | 469                 | 300                    | 774   | 1000                     | 15304          | 1534   |
| all                           | 337                                | 64                  | 8                      | 409       | 20                  | 447                 | 123                    | 590   | 1000                     | 144038         | 17306  |
| estd. no. of hosp. cases (00) | 48487                              | 9289                | 1187                   | 58973     | 2917                | 64315               | 17708                  | 84949 | 144038                   | X              | X      |
| sample no. of hosp. cases     | 6703                               | 1243                | 137                    | 8089      | 372                 | 7119                | 1698                   | 9191  | 17306                    | X              | X      |

Table (23): Per 1000 distribution of hospitalisation cases by type of hospital and type of ward for each mpce class and sex

| mpce class                    | Rural + Urban                      |                     |                        |           |                     |                     |                        |       | Females                  |                |        |
|-------------------------------|------------------------------------|---------------------|------------------------|-----------|---------------------|---------------------|------------------------|-------|--------------------------|----------------|--------|
|                               | type of hospital                   |                     |                        |           |                     |                     |                        |       | cases of hospitalisation |                |        |
|                               | public hospital+ public dispensary |                     |                        |           | private hospital    |                     |                        |       | total (incl. n.r. cases) | estd. no. (00) | sample |
|                               | type of ward                       |                     |                        |           | type of ward        |                     |                        |       |                          |                |        |
| free ward                     | paying general ward                | paying special ward | all (incl. n.r. cases) | free ward | paying general ward | paying special ward | all (incl. n.r. cases) |       |                          |                |        |
| (1)                           | (2)                                | (3)                 | (4)                    | (5)       | (6)                 | (7)                 | (8)                    | (9)   | (10)                     | (11)           | (12)   |
| 0 – 235                       | 529                                | 70                  | 8                      | 648       | 48                  | 257                 | 26                     | 332   | 1000                     | 3762           | 461    |
| 235 – 265                     | 521                                | 32                  | 0                      | 553       | 17                  | 396                 | 34                     | 447   | 1000                     | 3318           | 366    |
| 265 – 320                     | 481                                | 64                  | 4                      | 549       | 34                  | 384                 | 31                     | 450   | 1000                     | 6796           | 925    |
| 320 – 365                     | 448                                | 71                  | 1                      | 520       | 31                  | 407                 | 35                     | 473   | 1000                     | 8999           | 1188   |
| 365 – 410                     | 442                                | 81                  | 7                      | 530       | 41                  | 399                 | 29                     | 469   | 1000                     | 8306           | 1010   |
| 410 – 460                     | 397                                | 64                  | 2                      | 464       | 22                  | 442                 | 72                     | 536   | 1000                     | 11784          | 1404   |
| 460 – 520                     | 344                                | 75                  | 3                      | 422       | 29                  | 470                 | 78                     | 577   | 1000                     | 12633          | 1576   |
| 520 – 605                     | 342                                | 56                  | 6                      | 403       | 22                  | 468                 | 108                    | 597   | 1000                     | 14966          | 1830   |
| 605 – 730                     | 320                                | 54                  | 6                      | 381       | 23                  | 500                 | 94                     | 617   | 1000                     | 15788          | 1963   |
| 730 – 980                     | 239                                | 61                  | 4                      | 305       | 15                  | 494                 | 186                    | 695   | 1000                     | 18422          | 2171   |
| 980 – 1285                    | 240                                | 44                  | 14                     | 298       | 33                  | 478                 | 190                    | 702   | 1000                     | 9050           | 1017   |
| 1285 +                        | 159                                | 45                  | 18                     | 221       | 16                  | 408                 | 354                    | 779   | 1000                     | 13879          | 1448   |
| all                           | 334                                | 60                  | 6                      | 402       | 25                  | 446                 | 125                    | 597   | 1000                     | 127704         | 15359  |
| estd. no. of hosp. cases (00) | 42661                              | 7655                | 823                    | 51304     | 3199                | 56998               | 15986                  | 76190 | 127704                   | X              | X      |
| sample no. of hosp. cases     | 5809                               | 1041                | 112                    | 6970      | 353                 | 6386                | 1622                   | 8363  | 15359                    | X              | X      |

Table (23): Per 1000 distribution of hospitalisation cases by type of hospital and type of ward for each mpce class and sex

| mpce class                    | Rural + Urban                      |                     |                        |           |                     |                     |                        |        | Persons                  |                |        |
|-------------------------------|------------------------------------|---------------------|------------------------|-----------|---------------------|---------------------|------------------------|--------|--------------------------|----------------|--------|
|                               | type of hospital                   |                     |                        |           |                     |                     |                        |        | cases of hospitalisation |                |        |
|                               | public hospital+ public dispensary |                     |                        |           | private hospital    |                     |                        |        | total (incl. n.r. cases) | estd. no. (00) | sample |
|                               | type of ward                       |                     |                        |           | type of ward        |                     |                        |        |                          |                |        |
| free ward                     | paying general ward                | paying special ward | all (incl. n.r. cases) | free ward | paying general ward | paying special ward | all (incl. n.r. cases) |        |                          |                |        |
| (1)                           | (2)                                | (3)                 | (4)                    | (5)       | (6)                 | (7)                 | (8)                    | (9)    | (10)                     | (11)           | (12)   |
| 0 – 235                       | 539                                | 55                  | 7                      | 620       | 37                  | 295                 | 37                     | 369    | 1000                     | 8100           | 1068   |
| 235 – 265                     | 523                                | 47                  | 0                      | 570       | 14                  | 384                 | 31                     | 429    | 1000                     | 6191           | 785    |
| 265 – 320                     | 465                                | 76                  | 4                      | 545       | 30                  | 383                 | 40                     | 453    | 1000                     | 14728          | 2016   |
| 320 – 365                     | 446                                | 66                  | 1                      | 513       | 30                  | 403                 | 50                     | 483    | 1000                     | 19902          | 2581   |
| 365 – 410                     | 416                                | 70                  | 9                      | 495       | 44                  | 408                 | 52                     | 504    | 1000                     | 17803          | 2171   |
| 410 – 460                     | 414                                | 54                  | 5                      | 474       | 17                  | 438                 | 71                     | 526    | 1000                     | 25336          | 2945   |
| 460 – 520                     | 346                                | 80                  | 5                      | 431       | 21                  | 463                 | 84                     | 568    | 1000                     | 27010          | 3420   |
| 520 – 605                     | 349                                | 71                  | 6                      | 426       | 24                  | 440                 | 108                    | 573    | 1000                     | 30427          | 3762   |
| 605 – 730                     | 327                                | 51                  | 7                      | 384       | 23                  | 486                 | 104                    | 614    | 1000                     | 33572          | 4155   |
| 730 – 980                     | 244                                | 65                  | 6                      | 316       | 16                  | 504                 | 164                    | 684    | 1000                     | 40895          | 4708   |
| 980 – 1285                    | 242                                | 49                  | 16                     | 307       | 23                  | 474                 | 195                    | 693    | 1000                     | 18594          | 2072   |
| 1285 +                        | 154                                | 54                  | 17                     | 224       | 10                  | 440                 | 326                    | 776    | 1000                     | 29183          | 2982   |
| all                           | 335                                | 62                  | 7                      | 406       | 23                  | 446                 | 124                    | 593    | 1000                     | 271741         | 32665  |
| estd. no. of hosp. cases (00) | 91148                              | 16945               | 2010                   | 110277    | 6116                | 121313              | 33694                  | 161139 | 271741                   | X              | X      |
| sample no. of hosp. cases     | 12512                              | 2284                | 249                    | 15059     | 725                 | 13505               | 3320                   | 17554  | 32665                    | X              | X      |

Table (24): Per 1000 distribution of hospitalised cases receiving treatment during last 365 days by time when admitted into hospital and by time when discharged from hospital for each type of hospital and sex of patient

| All-India         |                                                      |                         |                        |      |       |            |                     |                         |      |       | Rural                                     |        |
|-------------------|------------------------------------------------------|-------------------------|------------------------|------|-------|------------|---------------------|-------------------------|------|-------|-------------------------------------------|--------|
| type of hospital  | cases receiving treatment as inpatient in a hospital |                         |                        |      |       |            |                     |                         |      |       | hospitalisation cases receiving treatment |        |
|                   | admitted                                             |                         |                        |      |       | discharged |                     |                         |      |       | estd. no. (00)                            | sample |
|                   | during last 15 days                                  | 16 days to 365 days ago | more than 365 days ago | n.r. | total | not yet    | during last 15 days | 16 days to 365 days ago | n.r. | total |                                           |        |
| (1)               | (2)                                                  | (3)                     | (4)                    | (5)  | (6)   | (7)        | (8)                 | (9)                     | (10) | (11)  | (12)                                      | (13)   |
| males             |                                                      |                         |                        |      |       |            |                     |                         |      |       |                                           |        |
| public hospital   | 35                                                   | 954                     | 11                     | 0    | 1000  | 23         | 103                 | 873                     | 0    | 1000  | 40223                                     | 5094   |
| public dispensary | 9                                                    | 988                     | 3                      | 0    | 1000  | 12         | 72                  | 915                     | 0    | 1000  | 1467                                      | 197    |
| private hospital  | 40                                                   | 945                     | 15                     | 0    | 1000  | 14         | 110                 | 876                     | 1    | 1000  | 57491                                     | 5654   |
| all               | 37                                                   | 949                     | 13                     | 1    | 1000  | 18         | 107                 | 875                     | 1    | 1000  | 99290                                     | 10967  |
| females           |                                                      |                         |                        |      |       |            |                     |                         |      |       |                                           |        |
| public hospital   | 30                                                   | 960                     | 10                     | 0    | 1000  | 19         | 104                 | 876                     | 0    | 1000  | 34558                                     | 4347   |
| public dispensary | 26                                                   | 968                     | 6                      | 0    | 1000  | 2          | 197                 | 800                     | 0    | 1000  | 1464                                      | 153    |
| private hospital  | 32                                                   | 957                     | 11                     | 0    | 1000  | 11         | 97                  | 892                     | 0    | 1000  | 51064                                     | 5047   |
| all               | 31                                                   | 957                     | 11                     | 1    | 1000  | 14         | 101                 | 883                     | 1    | 1000  | 87280                                     | 9567   |
| persons           |                                                      |                         |                        |      |       |            |                     |                         |      |       |                                           |        |
| public hospital   | 33                                                   | 957                     | 10                     | 0    | 1000  | 21         | 104                 | 875                     | 0    | 1000  | 74781                                     | 9441   |
| public dispensary | 18                                                   | 978                     | 4                      | 0    | 1000  | 7          | 135                 | 858                     | 0    | 1000  | 2931                                      | 350    |
| private hospital  | 36                                                   | 951                     | 13                     | 0    | 1000  | 12         | 104                 | 883                     | 0    | 1000  | 108555                                    | 10701  |
| all               | 34                                                   | 953                     | 12                     | 1    | 1000  | 16         | 104                 | 879                     | 1    | 1000  | 186570                                    | 20534  |

Table (24): Per 1000 distribution of hospitalised cases receiving treatment during last 365 days by time when admitted into hospital and by time when discharged from hospital for each type of hospital and sex of patient

| All-India         |                                                      |                         |                        |      |       |            |                     |                         |      |       | Urban                                     |        |
|-------------------|------------------------------------------------------|-------------------------|------------------------|------|-------|------------|---------------------|-------------------------|------|-------|-------------------------------------------|--------|
| type of hospital  | cases receiving treatment as inpatient in a hospital |                         |                        |      |       |            |                     |                         |      |       | hospitalisation cases receiving treatment |        |
|                   | admitted                                             |                         |                        |      |       | discharged |                     |                         |      |       | estd. no. (00)                            | sample |
|                   | during last 15 days                                  | 16 days to 365 days ago | more than 365 days ago | n.r. | total | not yet    | during last 15 days | 16 days to 365 days ago | n.r. | total |                                           |        |
| (1)               | (2)                                                  | (3)                     | (4)                    | (5)  | (6)   | (7)        | (8)                 | (9)                     | (10) | (11)  | (12)                                      | (13)   |
| males             |                                                      |                         |                        |      |       |            |                     |                         |      |       |                                           |        |
| public hospital   | 36                                                   | 951                     | 12                     | 0    | 1000  | 22         | 73                  | 905                     | 0    | 1000  | 15871                                     | 2614   |
| public dispensary | 79                                                   | 905                     | 17                     | 0    | 1000  | 16         | 135                 | 849                     | 0    | 1000  | 1412                                      | 184    |
| private hospital  | 38                                                   | 946                     | 16                     | 0    | 1000  | 15         | 83                  | 902                     | 0    | 1000  | 27458                                     | 3537   |
| all               | 39                                                   | 946                     | 15                     | 0    | 1000  | 17         | 81                  | 901                     | 0    | 1000  | 44748                                     | 6339   |
| females           |                                                      |                         |                        |      |       |            |                     |                         |      |       |                                           |        |
| public hospital   | 31                                                   | 963                     | 5                      | 1    | 1000  | 12         | 87                  | 901                     | 0    | 1000  | 14157                                     | 2303   |
| public dispensary | 35                                                   | 944                     | 20                     | 0    | 1000  | 34         | 79                  | 888                     | 0    | 1000  | 1125                                      | 167    |
| private hospital  | 49                                                   | 941                     | 10                     | 0    | 1000  | 13         | 98                  | 889                     | 0    | 1000  | 25126                                     | 3316   |
| all               | 43                                                   | 949                     | 9                      | 0    | 1000  | 13         | 93                  | 893                     | 0    | 1000  | 40424                                     | 5792   |
| persons           |                                                      |                         |                        |      |       |            |                     |                         |      |       |                                           |        |
| public hospital   | 34                                                   | 957                     | 9                      | 0    | 1000  | 17         | 80                  | 903                     | 0    | 1000  | 30028                                     | 4917   |
| public dispensary | 59                                                   | 922                     | 18                     | 0    | 1000  | 24         | 110                 | 866                     | 0    | 1000  | 2537                                      | 351    |
| private hospital  | 44                                                   | 943                     | 13                     | 0    | 1000  | 14         | 90                  | 896                     | 0    | 1000  | 52585                                     | 6853   |
| all               | 41                                                   | 948                     | 12                     | 0    | 1000  | 15         | 87                  | 897                     | 0    | 1000  | 85172                                     | 12131  |



Table (24): Per 1000 distribution of hospitalised cases receiving treatment during last 365 days by time when admitted into hospital and by time when discharged from hospital for each type of hospital and sex of patient

| All-India         |                                                      |                         |                        |      |       |            |                     |                         |      |       | Rural + Urban                             |         |
|-------------------|------------------------------------------------------|-------------------------|------------------------|------|-------|------------|---------------------|-------------------------|------|-------|-------------------------------------------|---------|
| type of hospital  | cases receiving treatment as inpatient in a hospital |                         |                        |      |       |            |                     |                         |      |       | hospitalisation cases receiving treatment |         |
|                   | admitted                                             |                         |                        |      |       | discharged |                     |                         |      |       | estd. no. (00)                            | sam-ple |
|                   | during last 15 days                                  | 16 days to 365 days ago | more than 365 days ago | n.r. | total | not yet    | during last 15 days | 16 days to 365 days ago | n.r. | total |                                           |         |
| (1)               | (2)                                                  | (3)                     | (4)                    | (5)  | (6)   | (7)        | (8)                 | (9)                     | (10) | (11)  | (12)                                      | (13)    |
| males             |                                                      |                         |                        |      |       |            |                     |                         |      |       |                                           |         |
| public hospital   | 35                                                   | 953                     | 11                     | 0    | 1000  | 23         | 95                  | 882                     | 0    | 1000  | 56094                                     | 7708    |
| public dispensary | 43                                                   | 947                     | 9                      | 0    | 1000  | 14         | 103                 | 883                     | 0    | 1000  | 2879                                      | 381     |
| private hospital  | 39                                                   | 946                     | 15                     | 0    | 1000  | 14         | 101                 | 884                     | 1    | 1000  | 84949                                     | 9191    |
| all               | 38                                                   | 948                     | 14                     | 0    | 1000  | 17         | 99                  | 883                     | 1    | 1000  | 144038                                    | 17306   |
| females           |                                                      |                         |                        |      |       |            |                     |                         |      |       |                                           |         |
| public hospital   | 30                                                   | 961                     | 8                      | 0    | 1000  | 17         | 99                  | 883                     | 0    | 1000  | 48715                                     | 6650    |
| public dispensary | 30                                                   | 958                     | 12                     | 0    | 1000  | 16         | 146                 | 838                     | 0    | 1000  | 2589                                      | 320     |
| private hospital  | 37                                                   | 952                     | 11                     | 0    | 1000  | 11         | 97                  | 891                     | 0    | 1000  | 76190                                     | 8363    |
| all               | 35                                                   | 955                     | 10                     | 1    | 1000  | 14         | 99                  | 887                     | 1    | 1000  | 127704                                    | 15359   |
| persons           |                                                      |                         |                        |      |       |            |                     |                         |      |       |                                           |         |
| public hospital   | 33                                                   | 957                     | 10                     | 0    | 1000  | 20         | 97                  | 883                     | 0    | 1000  | 104809                                    | 14358   |
| public dispensary | 37                                                   | 952                     | 11                     | 0    | 1000  | 15         | 123                 | 862                     | 0    | 1000  | 5468                                      | 701     |
| private hospital  | 38                                                   | 948                     | 13                     | 0    | 1000  | 13         | 99                  | 887                     | 0    | 1000  | 161139                                    | 17554   |
| all               | 36                                                   | 951                     | 12                     | 1    | 1000  | 16         | 99                  | 885                     | 1    | 1000  | 271741                                    | 32665   |

Table (25): Per 1000 distribution of hospitalisation cases by duration of stay in hospital and average duration of stay in hospital (in 0.0 days) for each type of hospital

All-India  
Rural

| type of hospital                               | duration of stay in hospital |                        |                         |                         |                          |                 |        | hospitalised cases                           |                |        |
|------------------------------------------------|------------------------------|------------------------|-------------------------|-------------------------|--------------------------|-----------------|--------|----------------------------------------------|----------------|--------|
|                                                | less than 7 days             | 7 to less than 15 days | 15 to less than 30 days | 30 to less than 90 days | 90 to less than 180 days | 180 to 365 days | total  | average duration of stay in hosp. (0.0 days) | estd. no. (00) | sample |
| (1)                                            | (2)                          | (3)                    | (4)                     | (5)                     | (6)                      | (7)             | (8)    | (9)                                          | (10)           | (11)   |
| public hospital (incl. PHC/ sub centres / CHC) | 516                          | 284                    | 126                     | 61                      | 11                       | 3               | 1000   | 11                                           | 74781          | 9441   |
| public dispensary (incl. CGHS/ESI)             | 509                          | 293                    | 148                     | 42                      | 6                        | 2               | 1000   | 9.7                                          | 2931           | 350    |
| public sector hospital                         | 516                          | 285                    | 126                     | 60                      | 10                       | 3               | 1000   | 10.9                                         | 77712          | 9791   |
| private hospital                               | 558                          | 297                    | 105                     | 35                      | 4                        | 1               | 1000   | 8.3                                          | 108555         | 10701  |
| all                                            | 540                          | 292                    | 114                     | 46                      | 7                        | 2               | 1000   | 9.4                                          | 186570         | 20534  |
| estd. no. of hosp. cases (00)                  | 100760                       | 54442                  | 21234                   | 8508                    | 1283                     | 343             | 186570 | X                                            | X              | X      |
| sample hosp. cases                             | 10435                        | 6170                   | 2606                    | 1109                    | 163                      | 51              | 20534  | X                                            | X              | X      |

Table (25): Per 1000 distribution of hospitalisation cases by duration of stay in hospital and average duration of stay in hospital (in 0.0 days) for each type of hospital

All-India

Urban

| type of hospital                                  | duration of stay in hospital |                        |                         |                         |                          |                 |       |                                              | hospitalised cases |        |
|---------------------------------------------------|------------------------------|------------------------|-------------------------|-------------------------|--------------------------|-----------------|-------|----------------------------------------------|--------------------|--------|
|                                                   | less than 7 days             | 7 to less than 15 days | 15 to less than 30 days | 30 to less than 90 days | 90 to less than 180 days | 180 to 365 days | total | average duration of stay in hosp. (0.0 days) | estd. no. (00)     | sample |
| (1)                                               | (2)                          | (3)                    | (4)                     | (5)                     | (6)                      | (7)             | (8)   | (9)                                          | (10)               | (11)   |
| public hospital<br>(incl. PHC/ sub centres / CHC) | 519                          | 290                    | 118                     | 56                      | 13                       | 4               | 1000  | 10.9                                         | 30028              | 4917   |
| public dispensary<br>(incl. CGHS/ESI)             | 511                          | 301                    | 126                     | 55                      | 6                        | 0               | 1000  | 9.4                                          | 2537               | 351    |
| public sector hospital                            | 518                          | 291                    | 119                     | 56                      | 13                       | 3               | 1000  | 10.8                                         | 32565              | 5268   |
| private hospital                                  | 619                          | 268                    | 88                      | 21                      | 4                        | 0               | 1000  | 7.3                                          | 52585              | 6853   |
| all                                               | 580                          | 277                    | 100                     | 34                      | 7                        | 2               | 1000  | 8.6                                          | 85172              | 12131  |
| estd. no. of hosp. cases (00)                     | 49425                        | 23566                  | 8497                    | 2928                    | 627                      | 129             | 85172 | X                                            | X                  | X      |
| sample hosp. cases                                | 6704                         | 3458                   | 1359                    | 522                     | 77                       | 11              | 12131 | X                                            | X                  | X      |

Table (25): Per 1000 distribution of hospitalisation cases by duration of stay in hospital and average duration of stay in hospital (in 0.0 days) for each type of hospital

| type of hospital                               | duration of stay in hospital |                        |                         |                         |                          |                 |        | hospitalised cases                           |                |        |
|------------------------------------------------|------------------------------|------------------------|-------------------------|-------------------------|--------------------------|-----------------|--------|----------------------------------------------|----------------|--------|
|                                                | less than 7 days             | 7 to less than 15 days | 15 to less than 30 days | 30 to less than 90 days | 90 to less than 180 days | 180 to 365 days | total  | average duration of stay in hosp. (0.0 days) | estd. no. (00) | sample |
| (1)                                            | (2)                          | (3)                    | (4)                     | (5)                     | (6)                      | (7)             | (8)    | (9)                                          | (10)           | (11)   |
| public hospital (incl. PHC/ sub centres / CHC) | 517                          | 286                    | 123                     | 60                      | 11                       | 3               | 1000   | 11                                           | 104809         | 14358  |
| public dispensary (incl. CGHS/ESI)             | 510                          | 297                    | 138                     | 48                      | 6                        | 1               | 1000   | 9.6                                          | 5468           | 701    |
| public sector hospital                         | 516                          | 287                    | 124                     | 59                      | 11                       | 3               | 1000   | 10.9                                         | 110277         | 15059  |
| private hospital                               | 578                          | 287                    | 100                     | 31                      | 4                        | 1               | 1000   | 8                                            | 161139         | 17554  |
| all                                            | 553                          | 287                    | 109                     | 42                      | 7                        | 2               | 1000   | 9.2                                          | 271741         | 32665  |
| estd. no. of hosp. cases (00)                  | 150185                       | 78009                  | 29730                   | 11436                   | 1910                     | 472             | 271741 | X                                            | X              | X      |
| sample hosp. cases                             | 17139                        | 9628                   | 3965                    | 1631                    | 240                      | 62              | 32665  | X                                            | X              | X      |

Table (26): Per 1000 distribution of hospitalisation cases by duration of stay in hospital and average duration of stay in hospital separately for government and private hospitals and for each mpce class

| All-India<br>mpce<br>classes        | government hospital          |                                    |                                     |                                    |                                      |                          |       | private hospitals            |                                    |                                     |                                     |                                      |                          |        | total  | average<br>duration of<br>stay<br>(0.0 days) |                     | Rural<br>hospitalised<br>cases |             |
|-------------------------------------|------------------------------|------------------------------------|-------------------------------------|------------------------------------|--------------------------------------|--------------------------|-------|------------------------------|------------------------------------|-------------------------------------|-------------------------------------|--------------------------------------|--------------------------|--------|--------|----------------------------------------------|---------------------|--------------------------------|-------------|
|                                     | duration of stay in hospital |                                    |                                     |                                    |                                      |                          |       | duration of stay in hospital |                                    |                                     |                                     |                                      |                          |        |        | in<br>govt.<br>hosp                          | in<br>pvt.<br>hosp. | estd.<br>no.<br>(00)           | sam-<br>ple |
|                                     | less<br>than<br>7<br>days    | 7 to<br>less<br>than<br>15<br>days | 15 to<br>less<br>than<br>30<br>days | 30 to<br>less<br>than<br>90<br>day | 90 to<br>less<br>than<br>180<br>days | 180<br>to<br>365<br>days | all   | less<br>than<br>7<br>days    | 7 to<br>less<br>than<br>15<br>days | 15 to<br>less<br>than<br>30<br>days | 30 to<br>less<br>than<br>90<br>days | 90 to<br>less<br>than<br>180<br>days | 180<br>to<br>365<br>days | all    |        |                                              |                     |                                |             |
| (1)                                 | (2)                          | (3)                                | (4)                                 | (5)                                | (6)                                  | (7)                      | (8)   | (9)                          | (10)                               | (11)                                | (12)                                | (13)                                 | (14)                     | (15)   | (16)   | (17)                                         | (18)                | (19)                           | (20)        |
| 0 – 225                             | 335                          | 166                                | 68                                  | 35                                 | 18                                   | 13                       | 635   | 193                          | 86                                 | 54                                  | 17                                  | 0                                    | 0                        | 350    | 1000   | 19.2                                         | 8.5                 | 5952                           | 758         |
| 225 – 255                           | 330                          | 127                                | 64                                  | 24                                 | 17                                   | 0                        | 562   | 309                          | 88                                 | 31                                  | 7                                   | 2                                    | 0                        | 437    | 1000   | 11.1                                         | 6.6                 | 4693                           | 571         |
| 255 – 300                           | 304                          | 158                                | 45                                  | 23                                 | 6                                    | 1                        | 537   | 233                          | 156                                | 44                                  | 24                                  | 3                                    | 0                        | 461    | 1000   | 9.2                                          | 9                   | 10436                          | 1396        |
| 300 – 340                           | 250                          | 139                                | 60                                  | 34                                 | 8                                    | 0                        | 491   | 258                          | 167                                | 54                                  | 23                                  | 2                                    | 0                        | 503    | 1000   | 10.9                                         | 8.6                 | 11546                          | 1425        |
| 340 – 380                           | 256                          | 133                                | 52                                  | 37                                 | 6                                    | 2                        | 485   | 282                          | 164                                | 49                                  | 16                                  | 1                                    | 2                        | 514    | 1000   | 12                                           | 8.2                 | 13519                          | 1571        |
| 380 – 420                           | 270                          | 153                                | 63                                  | 25                                 | 4                                    | 1                        | 515   | 274                          | 147                                | 43                                  | 17                                  | 3                                    | 1                        | 485    | 1000   | 9.6                                          | 8.1                 | 17230                          | 1886        |
| 420 – 470                           | 229                          | 120                                | 55                                  | 30                                 | 2                                    | 1                        | 438   | 308                          | 159                                | 64                                  | 27                                  | 3                                    | 1                        | 561    | 1000   | 10.6                                         | 9                   | 16740                          | 1977        |
| 470 – 525                           | 231                          | 128                                | 57                                  | 25                                 | 2                                    | 0                        | 443   | 309                          | 161                                | 67                                  | 18                                  | 0                                    | 0                        | 557    | 1000   | 9.2                                          | 8                   | 20700                          | 2329        |
| 525 – 615                           | 185                          | 122                                | 56                                  | 26                                 | 4                                    | 3                        | 395   | 350                          | 171                                | 61                                  | 17                                  | 2                                    | 1                        | 602    | 1000   | 11.8                                         | 8.2                 | 22538                          | 2483        |
| 615 – 775                           | 165                          | 98                                 | 45                                  | 21                                 | 3                                    | 0                        | 332   | 386                          | 186                                | 70                                  | 21                                  | 5                                    | 0                        | 668    | 1000   | 10.9                                         | 8.1                 | 27607                          | 2785        |
| 775 – 950                           | 175                          | 91                                 | 48                                  | 24                                 | 1                                    | 1                        | 339   | 336                          | 213                                | 86                                  | 22                                  | 3                                    | 1                        | 660    | 1000   | 10.4                                         | 9                   | 14186                          | 1466        |
| 950 +                               | 119                          | 68                                 | 40                                  | 14                                 | 2                                    | 0                        | 244   | 428                          | 230                                | 68                                  | 27                                  | 3                                    | 1                        | 756    | 1000   | 10.3                                         | 8.3                 | 21424                          | 1887        |
| all                                 | 215                          | 119                                | 53                                  | 25                                 | 4                                    | 1                        | 417   | 325                          | 173                                | 61                                  | 21                                  | 3                                    | 1                        | 582    | 1000   | 10.9                                         | 8.3                 | 186570                         | 20534       |
| estd. no. of<br>hosp. cases<br>(00) | 40063                        | 22119                              | 9819                                | 4674                               | 814                                  | 224                      | 77712 | 60543                        | 32198                              | 11408                               | 3834                                | 469                                  | 102                      | 108555 | 186570 | X                                            | X                   | X                              | X           |
| sample<br>hosp. cases               | 4893                         | 2797                               | 1338                                | 628                                | 105                                  | 30                       | 9791  | 5516                         | 3363                               | 1265                                | 481                                 | 58                                   | 18                       | 10701  | 20534  | X                                            | X                   | X                              | X           |

Table (26): Per 1000 distribution of hospitalisation cases by duration of stay in hospital and average duration of stay in hospital separately for government and private hospitals and for each mpce class

| mpce classes                  | government hospital          |                        |                         |                        |                          |                 |       | private hospitals            |                        |                         |                         |                          |                 |       | total | average duration of stay (0.0 days) |               | Urban hospitalised cases |        |
|-------------------------------|------------------------------|------------------------|-------------------------|------------------------|--------------------------|-----------------|-------|------------------------------|------------------------|-------------------------|-------------------------|--------------------------|-----------------|-------|-------|-------------------------------------|---------------|--------------------------|--------|
|                               | duration of stay in hospital |                        |                         |                        |                          |                 |       | duration of stay in hospital |                        |                         |                         |                          |                 |       |       | in govt. hosp                       | in pvt. hosp. | estd. no. (00)           | sample |
|                               | less than 7 days             | 7 to less than 15 days | 15 to less than 30 days | 30 to less than 90 day | 90 to less than 180 days | 180 to 365 days | all   | less than 7 days             | 7 to less than 15 days | 15 to less than 30 days | 30 to less than 90 days | 90 to less than 180 days | 180 to 365 days | all   |       |                                     |               |                          |        |
| (1)                           | (2)                          | (3)                    | (4)                     | (5)                    | (6)                      | (7)             | (8)   | (9)                          | (10)                   | (11)                    | (12)                    | (13)                     | (14)            | (15)  | (16)  | (17)                                | (18)          | (19)                     | (20)   |
| All India                     |                              |                        |                         |                        |                          |                 |       |                              |                        |                         |                         |                          |                 |       |       |                                     |               |                          |        |
| -300                          | 396                          | 114                    | 48                      | 14                     | 7                        | 0               | 579   | 261                          | 97                     | 55                      | 8                       | 0                        | 0               | 421   | 1000  | 7.4                                 | 7.2           | 2148                     | 310    |
| 300 - 350                     | 358                          | 165                    | 45                      | 28                     | 0                        | 0               | 597   | 230                          | 131                    | 23                      | 11                      | 0                        | 9               | 403   | 1000  | 7.6                                 | 15.2          | 1498                     | 214    |
| 350 - 425                     | 332                          | 144                    | 50                      | 18                     | 7                        | 15              | 564   | 257                          | 133                    | 34                      | 12                      | 0                        | 0               | 435   | 1000  | 14.5                                | 7.1           | 4292                     | 620    |
| 425 - 500                     | 228                          | 187                    | 72                      | 41                     | 15                       | 0               | 544   | 262                          | 131                    | 48                      | 14                      | 0                        | 0               | 455   | 1000  | 12.6                                | 7.1           | 8357                     | 1156   |
| 500 - 575                     | 311                          | 113                    | 65                      | 30                     | 7                        | 0               | 526   | 309                          | 132                    | 23                      | 10                      | 0                        | 0               | 474   | 1000  | 10.2                                | 5.9           | 4284                     | 600    |
| 575 - 665                     | 169                          | 131                    | 58                      | 23                     | 4                        | 1               | 386   | 423                          | 141                    | 36                      | 13                      | 0                        | 1               | 614   | 1000  | 11.1                                | 6.3           | 8105                     | 1059   |
| 665 - 775                     | 210                          | 131                    | 48                      | 26                     | 3                        | 3               | 422   | 329                          | 174                    | 61                      | 9                       | 5                        | 0               | 578   | 1000  | 10.8                                | 7.8           | 10270                    | 1443   |
| 775 - 915                     | 207                          | 108                    | 47                      | 21                     | 8                        | 0               | 391   | 364                          | 181                    | 52                      | 10                      | 1                        | 0               | 609   | 1000  | 11.1                                | 6.8           | 9727                     | 1433   |
| 915 - 1120                    | 198                          | 98                     | 45                      | 19                     | 1                        | 0               | 361   | 394                          | 155                    | 70                      | 17                      | 1                        | 0               | 639   | 1000  | 9.1                                 | 7.4           | 11035                    | 1672   |
| 1120 - 1500                   | 148                          | 87                     | 30                      | 14                     | 2                        | 0               | 281   | 467                          | 176                    | 60                      | 10                      | 5                        | 0               | 719   | 1000  | 9.4                                 | 7.1           | 13288                    | 1923   |
| 1500 - 1925                   | 103                          | 54                     | 22                      | 24                     | 0                        | 0               | 203   | 485                          | 232                    | 58                      | 17                      | 6                        | 0               | 797   | 1000  | 10.1                                | 7.6           | 4408                     | 606    |
| 1925 +                        | 87                           | 48                     | 24                      | 7                      | 4                        | 0               | 170   | 514                          | 216                    | 74                      | 21                      | 5                        | 0               | 830   | 1000  | 10.9                                | 7.6           | 7759                     | 1095   |
| all                           | 198                          | 111                    | 45                      | 21                     | 5                        | 1               | 382   | 382                          | 165                    | 54                      | 13                      | 2                        | 0               | 617   | 1000  | 10.8                                | 7.3           | 85172                    | 12131  |
| estd. no. of hosp. cases (00) | 16869                        | 9480                   | 3864                    | 1831                   | 415                      | 106             | 32565 | 32543                        | 14076                  | 4633                    | 1097                    | 211                      | 23              | 52585 | 85172 | X                                   | X             | X                        | X      |
| sample hosp. cases            | 2691                         | 1524                   | 674                     | 314                    | 58                       | 7               | 5268  | 4005                         | 1932                   | 685                     | 208                     | 19                       | 4               | 6853  | 12131 | X                                   | X             | X                        | X      |

Table (26): Per 1000 distribution of hospitalisation cases by duration of stay in hospital and average duration of stay in hospital separately for government and private hospitals and for each mpce class

| All India                     |                              |                        |                         |                        |                          |                 |        |                              |                        |                         |                         |                          |                 |        |        |                                     | Rural + Urban |                    |        |
|-------------------------------|------------------------------|------------------------|-------------------------|------------------------|--------------------------|-----------------|--------|------------------------------|------------------------|-------------------------|-------------------------|--------------------------|-----------------|--------|--------|-------------------------------------|---------------|--------------------|--------|
| mpce classes                  | government hospital          |                        |                         |                        |                          |                 |        | private hospitals            |                        |                         |                         |                          |                 |        | total  | average duration of stay (0.0 days) |               | hospitalised cases |        |
|                               | duration of stay in hospital |                        |                         |                        |                          |                 |        | duration of stay in hospital |                        |                         |                         |                          |                 |        |        | in govt. hosp.                      | in pvt. hosp. | estd. no. (00)     | sample |
|                               | less than 7 days             | 7 to less than 15 days | 15 to less than 30 days | 30 to less than 90 day | 90 to less than 180 days | 180 to 365 days | all    | less than 7 days             | 7 to less than 15 days | 15 to less than 30 days | 30 to less than 90 days | 90 to less than 180 days | 180 to 365 days | all    |        |                                     |               |                    |        |
| (1)                           | (2)                          | (3)                    | (4)                     | (5)                    | (6)                      | (7)             | (8)    | (9)                          | (10)                   | (11)                    | (12)                    | (13)                     | (14)            | (15)   | (16)   | (17)                                | (18)          | (19)               | (20)   |
| 0 – 235                       | 351                          | 152                    | 62                      | 30                     | 15                       | 9               | 620    | 211                          | 89                     | 54                      | 15                      | 0                        | 0               | 369    | 1000   | 16.3                                | 8.1           | 8100               | 1068   |
| 235 – 265                     | 337                          | 136                    | 59                      | 25                     | 13                       | 0               | 570    | 290                          | 99                     | 29                      | 8                       | 1                        | 2               | 429    | 1000   | 10.2                                | 8.5           | 6191               | 785    |
| 265 – 320                     | 312                          | 154                    | 46                      | 21                     | 6                        | 5               | 545    | 240                          | 150                    | 41                      | 21                      | 2                        | 0               | 453    | 1000   | 10.8                                | 8.5           | 14728              | 2016   |
| 320 – 365                     | 241                          | 159                    | 65                      | 37                     | 11                       | 0               | 513    | 260                          | 152                    | 51                      | 19                      | 1                        | 0               | 483    | 1000   | 11.7                                | 8             | 19902              | 2581   |
| 365 – 410                     | 269                          | 128                    | 55                      | 35                     | 6                        | 2               | 495    | 289                          | 156                    | 43                      | 15                      | 1                        | 1               | 504    | 1000   | 11.5                                | 7.7           | 17803              | 2171   |
| 410 – 460                     | 238                          | 146                    | 61                      | 24                     | 4                        | 1               | 474    | 321                          | 145                    | 41                      | 16                      | 2                        | 1               | 526    | 1000   | 10                                  | 7.5           | 25336              | 2945   |
| 460 – 520                     | 222                          | 124                    | 53                      | 28                     | 3                        | 2               | 431    | 316                          | 165                    | 63                      | 20                      | 3                        | 0               | 568    | 1000   | 10.7                                | 8.6           | 27010              | 3420   |
| 520 – 605                     | 223                          | 122                    | 54                      | 24                     | 4                        | 0               | 426    | 327                          | 168                    | 63                      | 16                      | 1                        | 0               | 573    | 1000   | 9.8                                 | 7.6           | 30427              | 3762   |
| 605 – 730                     | 189                          | 114                    | 52                      | 24                     | 3                        | 2               | 384    | 364                          | 166                    | 64                      | 17                      | 2                        | 1               | 614    | 1000   | 11                                  | 7.9           | 33572              | 4155   |
| 730 – 980                     | 159                          | 95                     | 40                      | 18                     | 3                        | 0               | 316    | 412                          | 183                    | 67                      | 18                      | 5                        | 0               | 684    | 1000   | 10.4                                | 7.8           | 40895              | 4708   |
| 980 – 1285                    | 158                          | 82                     | 42                      | 24                     | 1                        | 1               | 307    | 371                          | 217                    | 79                      | 21                      | 4                        | 1               | 693    | 1000   | 10.4                                | 8.6           | 18594              | 2072   |
| 1285 +                        | 110                          | 63                     | 36                      | 12                     | 3                        | 0               | 224    | 451                          | 226                    | 70                      | 25                      | 4                        | 1               | 776    | 1000   | 10.4                                | 8.1           | 29183              | 2982   |
| all                           | 210                          | 116                    | 50                      | 24                     | 5                        | 1               | 406    | 343                          | 170                    | 59                      | 18                      | 3                        | 0               | 593    | 1000   | 10.9                                | 8             | 271741             | 32665  |
| estd. no. of hosp. cases (00) | 56932                        | 31599                  | 13683                   | 6504                   | 1229                     | 330             | 110277 | 93086                        | 46274                  | 16042                   | 4931                    | 680                      | 125             | 161139 | 271741 | X                                   | X             | X                  | X      |
| sample hosp. cases            | 7584                         | 4321                   | 2012                    | 942                    | 163                      | 37              | 15059  | 9521                         | 5295                   | 1950                    | 689                     | 77                       | 22              | 17554  | 32665  | X                                   | X             | X                  | X      |

Table (27): Number per 1000 cases of hospitalisation receiving specific types of medical service and their break-up by payment category for different types of hospital

| All-India                     |                                        |                  |             |            |       | Rural                             |                  |             |            |       |                                               | Males               |             |            |       |                                                 |                        |             |            |       |
|-------------------------------|----------------------------------------|------------------|-------------|------------|-------|-----------------------------------|------------------|-------------|------------|-------|-----------------------------------------------|---------------------|-------------|------------|-------|-------------------------------------------------|------------------------|-------------|------------|-------|
| type of hospital              | medical services received as inpatient |                  |             |            |       |                                   |                  |             |            |       |                                               |                     |             |            |       |                                                 |                        |             |            |       |
|                               | no. per 1000 cases recg. surgery       | surgery          |             |            |       | no. per 1000 cases recg. medicine | medicine         |             |            |       | no. per 1000 cases recg. X-ray/ ECG/ EEG/Scan | X-ray/ECG/ EEG/Scan |             |            |       | no. per 1000 cases recg. other diagnostic tests | other diagnostic tests |             |            |       |
|                               |                                        | service received |             |            | all   |                                   | service received |             |            | all   |                                               | service received    |             |            | all   |                                                 | service received       |             |            | all   |
|                               |                                        | free             | partly free | on payment |       |                                   | free             | partly free | on payment |       |                                               | free                | partly free | on payment |       |                                                 | free                   | partly free | on payment |       |
| (1)                           | (2)                                    | (3)              | (4)         | (5)        | (6)   | (7)                               | (8)              | (9)         | (10)       | (11)  | (12)                                          | (13)                | (14)        | (15)       | (16)  | (17)                                            | (18)                   | (19)        | (20)       | (21)  |
| public hosp.                  | 200                                    | 707              | 86          | 208        | 1000  | 963                               | 185              | 416         | 399        | 1000  | 499                                           | 293                 | 160         | 547        | 1000  | 702                                             | 373                    | 153         | 474        | 1000  |
| public dis.                   | 237                                    | 585              | 185         | 230        | 1000  | 993                               | 191              | 304         | 505        | 1000  | 584                                           | 316                 | 154         | 530        | 1000  | 796                                             | 390                    | 72          | 538        | 1000  |
| private hos.                  | 230                                    | 40               | 21          | 939        | 1000  | 979                               | 8                | 18          | 974        | 1000  | 598                                           | 13                  | 10          | 977        | 1000  | 773                                             | 15                     | 11          | 973        | 1000  |
| all                           | 218                                    | 296              | 48          | 656        | 1000  | 972                               | 82               | 182         | 736        | 1000  | 557                                           | 119                 | 67          | 814        | 1000  | 744                                             | 158                    | 66          | 776        | 1000  |
| estd. no. of hosp. cases (00) | 21636                                  | 6410             | 1035        | 14191      | 21636 | 96527                             | 7917             | 17586       | 71024      | 96527 | 55337                                         | 6598                | 3690        | 45050      | 55337 | 73875                                           | 11667                  | 4900        | 57309      | 73875 |
| sample hosp. cases            | 2628                                   | 765              | 133         | 1730       | 2628  | 10539                             | 824              | 2027        | 7688       | 10539 | 6253                                          | 776                 | 467         | 5010       | 6253  | 8113                                            | 1378                   | 601         | 6134       | 8113  |



1  
2  
3  
4  
5  
6  
7  
8  
9  
10  
11  
12  
13  
14  
15  
16  
17  
18  
19  
20  
21  
22  
23  
24  
25  
26  
27  
28  
29  
30  
31  
32  
33  
34  
35  
36  
37  
38  
39  
40  
41  
42  
43  
44  
45  
46  
47

Table (27): Number per 1000 cases of hospitalisation receiving specific types of medical service and their break-up by payment category for different types of hospital

| All-India                     |                                  | Rural                                  |             |            |       |                                   |                  |             |            |       |                                               | Females             |             |            |       |                                                 |                        |             |            |       |
|-------------------------------|----------------------------------|----------------------------------------|-------------|------------|-------|-----------------------------------|------------------|-------------|------------|-------|-----------------------------------------------|---------------------|-------------|------------|-------|-------------------------------------------------|------------------------|-------------|------------|-------|
| type of hospital              | no. per 1000 cases recg. surgery | medical services received as inpatient |             |            |       |                                   |                  |             |            |       |                                               |                     |             |            |       |                                                 |                        |             |            |       |
|                               |                                  | surgery                                |             |            |       | no. per 1000 cases recg. medicine | medicine         |             |            |       | no. per 1000 cases recg. X-ray/ ECG/ EEG/Scan | X-ray/ECG/ EEG/Scan |             |            |       | no. per 1000 cases recg. other diagnostic tests | other diagnostic tests |             |            |       |
|                               |                                  | service received                       |             |            | all   |                                   | service received |             |            | all   |                                               | service received    |             |            | all   |                                                 | service received       |             |            | all   |
|                               |                                  | free                                   | partly free | on payment |       |                                   | free             | partly free | on payment |       |                                               | free                | partly free | on payment |       |                                                 | free                   | partly free | on payment |       |
| (1)                           | (2)                              | (3)                                    | (4)         | (5)        | (6)   | (7)                               | (8)              | (9)         | (10)       | (11)  | (12)                                          | (13)                | (14)        | (15)       | (16)  | (17)                                            | (18)                   | (19)        | (20)       | (21)  |
| public hosp.                  | 208                              | 700                                    | 122         | 178        | 1000  | 970                               | 196              | 400         | 405        | 1000  | 451                                           | 284                 | 158         | 557        | 1000  | 685                                             | 383                    | 141         | 476        | 1000  |
| public dis.                   | 262                              | 406                                    | 177         | 417        | 1000  | 980                               | 223              | 256         | 521        | 1000  | 492                                           | 285                 | 155         | 560        | 1000  | 763                                             | 430                    | 65          | 505        | 1000  |
| private hos.                  | 266                              | 71                                     | 9           | 921        | 1000  | 972                               | 19               | 11          | 970        | 1000  | 585                                           | 9                   | 9           | 983        | 1000  | 777                                             | 17                     | 6           | 977        | 1000  |
| all                           | 244                              | 294                                    | 50          | 655        | 1000  | 970                               | 93               | 169         | 738        | 1000  | 530                                           | 106                 | 61          | 832        | 1000  | 739                                             | 158                    | 57          | 785        | 1000  |
| estd. no. of hosp. cases (00) | 21266                            | 6262                                   | 1065        | 13938      | 21266 | 84657                             | 7843             | 14331       | 62484      | 84657 | 46219                                         | 4911                | 2833        | 38474      | 46219 | 64530                                           | 10199                  | 3653        | 50677      | 64530 |
| sample hosp. cases            | 2618                             | 714                                    | 125         | 1779       | 2618  | 9224                              | 768              | 1708        | 6748       | 9224  | 5309                                          | 610                 | 354         | 4345       | 5309  | 7138                                            | 1197                   | 493         | 5448       | 7138  |

Table (27): Number per 1000 cases of hospitalisation receiving specific types of medical service and their break-up by payment category for different types of hospital

| All-India                     |                                        | Rural            |             |            |       |                                   |                  |             |            |        |                                             | Persons            |             |            |        |                                                 |                        |             |            |        |
|-------------------------------|----------------------------------------|------------------|-------------|------------|-------|-----------------------------------|------------------|-------------|------------|--------|---------------------------------------------|--------------------|-------------|------------|--------|-------------------------------------------------|------------------------|-------------|------------|--------|
| type of hospital              | medical services received as inpatient |                  |             |            |       |                                   |                  |             |            |        |                                             |                    |             |            |        |                                                 |                        |             |            |        |
|                               | no. per 1000 cases recg. surgery       | surgery          |             |            |       | no. per 1000 cases recg. medicine | medicine         |             |            |        | no. per 1000 cases recg. X-ray/ECG/EEG/Scan | X-ray/ECG/EEG/Scan |             |            |        | no. per 1000 cases recg. other diagnostic tests | other diagnostic tests |             |            |        |
|                               |                                        | service received |             |            | all   |                                   | service received |             |            | all    |                                             | service received   |             |            | all    |                                                 | service received       |             |            | all    |
|                               |                                        | free             | partly free | on payment |       |                                   | free             | partly free | on payment |        |                                             | free               | partly free | on payment |        |                                                 | free                   | partly free | on payment |        |
| (1)                           | (2)                                    | (3)              | (4)         | (5)        | (6)   | (7)                               | (8)              | (9)         | (10)       | (11)   | (12)                                        | (13)               | (14)        | (15)       | (16)   | (17)                                            | (18)                   | (19)        | (20)       | (21)   |
| public hosp.                  | 204                                    | 704              | 103         | 193        | 1000  | 966                               | 190              | 409         | 401        | 1000   | 477                                         | 289                | 159         | 552        | 1000   | 694                                             | 378                    | 148         | 475        | 1000   |
| public dis.                   | 250                                    | 491              | 181         | 328        | 1000  | 987                               | 206              | 281         | 513        | 1000   | 538                                         | 302                | 154         | 544        | 1000   | 780                                             | 409                    | 68          | 522        | 1000   |
| private hos.                  | 247                                    | 56               | 15          | 930        | 1000  | 976                               | 14               | 15          | 972        | 1000   | 592                                         | 11                 | 9           | 980        | 1000   | 775                                             | 16                     | 9           | 975        | 1000   |
| all                           | 230                                    | 295              | 49          | 656        | 1000  | 971                               | 87               | 176         | 737        | 1000   | 544                                         | 113                | 64          | 822        | 1000   | 742                                             | 158                    | 62          | 780        | 1000   |
| estd. no. of hosp. cases (00) | 42901                                  | 12673            | 2100        | 28129      | 42901 | 181184                            | 15760            | 31917       | 133508     | 181184 | 101555                                      | 11508              | 6523        | 83524      | 101555 | 138404                                          | 21866                  | 8553        | 107986     | 138404 |
| sample hosp. cases            | 5246                                   | 1479             | 258         | 3509       | 5246  | 19763                             | 1592             | 3735        | 14436      | 19763  | 11562                                       | 1386               | 821         | 9355       | 11562  | 15251                                           | 2575                   | 1094        | 11582      | 15251  |

Table (27): Number per 1000 cases of hospitalisation receiving specific types of medical service and their break-up by payment category for different types of hospital

| All-India                |                                  | Urban                                  |             |            |      |                                   |                  |             |            |       |                                             | Males              |             |            |       |                                                 |                        |             |            |       |       |
|--------------------------|----------------------------------|----------------------------------------|-------------|------------|------|-----------------------------------|------------------|-------------|------------|-------|---------------------------------------------|--------------------|-------------|------------|-------|-------------------------------------------------|------------------------|-------------|------------|-------|-------|
| type of hospital         | no. per 1000 cases recg. surgery | medical services received as inpatient |             |            |      |                                   |                  |             |            |       |                                             |                    |             |            |       |                                                 |                        |             |            |       |       |
|                          |                                  | surgery                                |             |            |      | no. per 1000 cases recg. medicine | medicine         |             |            |       | no. per 1000 cases recg. X-ray/ECG/EEG/Scan | X-ray/ECG/EEG/Scan |             |            |       | no. per 1000 cases recg. other diagnostic tests | other diagnostic tests |             |            |       |       |
|                          |                                  | service received                       |             |            | all  |                                   | service received |             |            | all   |                                             | service received   |             |            | all   |                                                 | service received       |             |            | all   |       |
|                          |                                  | free                                   | partly free | on payment |      |                                   | free             | partly free | on payment |       |                                             | free               | partly free | on payment |       |                                                 | free                   | partly free | on payment |       |       |
| (1)                      | (2)                              | (3)                                    | (4)         | (5)        | (6)  | (7)                               | (8)              | (9)         | (10)       | (11)  | (12)                                        | (13)               | (14)        | (15)       | (16)  | (17)                                            | (18)                   | (19)        | (20)       | (21)  |       |
| public hosp.             | 194                              | 657                                    | 135         | 208        | 1000 | 967                               | 256              | 378         | 365        | 1000  | 586                                         | 395                | 165         | 441        | 1000  | 739                                             | 441                    | 163         | 396        | 1000  |       |
| public dis.              | 226                              | 792                                    | 26          | 181        | 1000 | 983                               | 311              | 436         | 253        | 1000  | 626                                         | 592                | 134         | 275        | 1000  | 809                                             | 610                    | 156         | 233        | 1000  |       |
| private hos.             | 254                              | 34                                     | 16          | 950        | 1000 | 972                               | 13               | 15          | 972        | 1000  | 655                                         | 20                 | 8           | 972        | 1000  | 845                                             | 19                     | 9           | 971        | 1000  |       |
| all                      | 232                              | 243                                    | 52          | 705        | 1000 | 971                               | 109              | 157         | 735        | 1000  | 629                                         | 162                | 64          | 774        | 1000  | 806                                             | 175                    | 64          | 761        | 1000  |       |
| estd. no. of hosp. cases | (00)                             | 10380                                  | 2520        | 538        | 7322 | 10380                             | 43438            | 4722        | 6807       | 31909 | 43438                                       | 28161              | 4555        | 1801       | 21805 | 28161                                           | 36083                  | 6319        | 2311       | 27453 | 36083 |
| sample hosp. cases       |                                  | 1581                                   | 401         | 78         | 1102 | 1581                              | 6165             | 675         | 995        | 4495  | 6165                                        | 4069               | 656         | 285        | 3128  | 4069                                            | 5063                   | 928         | 357        | 3778  | 5063  |

Table (27): Number per 1000 cases of hospitalisation receiving specific types of medical service and their break-up by payment category for different types of hospital

| All-India                     |                                        |                  |             |            |       | Urban                             |                  |             |            |       |                                             | Females            |             |            |       |                                                 |                        |             |            |       |
|-------------------------------|----------------------------------------|------------------|-------------|------------|-------|-----------------------------------|------------------|-------------|------------|-------|---------------------------------------------|--------------------|-------------|------------|-------|-------------------------------------------------|------------------------|-------------|------------|-------|
| type of hospital              | medical services received as inpatient |                  |             |            |       |                                   |                  |             |            |       |                                             |                    |             |            |       |                                                 |                        |             |            |       |
|                               | no. per 1000 cases recg. surgery       | surgery          |             |            |       | no. per 1000 cases recg. medicine | medicine         |             |            |       | no. per 1000 cases recg. X-ray/ECG/EEG/Scan | X-ray/ECG/EEG/Scan |             |            |       | no. per 1000 cases recg. other diagnostic tests | other diagnostic tests |             |            |       |
|                               |                                        | service received |             |            | all   |                                   | service received |             |            | all   |                                             | service received   |             |            | all   |                                                 | service received       |             |            | all   |
|                               |                                        | free             | partly free | on payment |       |                                   | free             | partly free | on payment |       |                                             | free               | partly free | on payment |       |                                                 | free                   | partly free | on payment |       |
| (1)                           | (2)                                    | (3)              | (4)         | (5)        | (6)   | (7)                               | (8)              | (9)         | (10)       | (11)  | (12)                                        | (13)               | (14)        | (15)       | (16)  | (17)                                            | (18)                   | (19)        | (20)       | (21)  |
| public hosp.                  | 234                                    | 667              | 108         | 225        | 1000  | 980                               | 234              | 365         | 401        | 1000  | 550                                         | 379                | 171         | 450        | 1000  | 729                                             | 448                    | 153         | 399        | 1000  |
| public dis.                   | 301                                    | 858              | 23          | 119        | 1000  | 976                               | 359              | 347         | 294        | 1000  | 613                                         | 485                | 191         | 324        | 1000  | 794                                             | 484                    | 218         | 298        | 1000  |
| private hos.                  | 300                                    | 27               | 8           | 964        | 1000  | 972                               | 13               | 14          | 973        | 1000  | 628                                         | 13                 | 10          | 977        | 1000  | 836                                             | 15                     | 8           | 977        | 1000  |
| all                           | 277                                    | 242              | 38          | 720        | 1000  | 975                               | 100              | 147         | 753        | 1000  | 600                                         | 144                | 67          | 789        | 1000  | 797                                             | 166                    | 60          | 773        | 1000  |
| estd. no. of hosp. cases (00) | 11187                                  | 2704             | 427         | 8056       | 11187 | 39409                             | 3959             | 5785        | 29665      | 39409 | 24260                                       | 3491               | 1617        | 19152      | 24260 | 32231                                           | 5363                   | 1946        | 24922      | 32231 |
| sample hosp. cases            | 1726                                   | 454              | 70          | 1202       | 1726  | 5612                              | 590              | 829         | 4193       | 5612  | 3587                                        | 552                | 242         | 2793       | 3587  | 4659                                            | 860                    | 281         | 3518       | 4659  |

Table (27): Number per 1000 cases of hospitalisation receiving specific types of medical service and their break-up by payment category for different types of hospital

| All-India                     |                                        |                  |             |            |       | Urban                             |                  |             |            |       | Persons                                     |                    |             |            |       |                                                 |                        |             |            |       |
|-------------------------------|----------------------------------------|------------------|-------------|------------|-------|-----------------------------------|------------------|-------------|------------|-------|---------------------------------------------|--------------------|-------------|------------|-------|-------------------------------------------------|------------------------|-------------|------------|-------|
| type of hospital              | medical services received as inpatient |                  |             |            |       |                                   |                  |             |            |       |                                             |                    |             |            |       |                                                 |                        |             |            |       |
|                               | no. per 1000 cases recg. surgery       | surgery          |             |            |       | no. per 1000 cases recg. medicine | medicine         |             |            |       | no. per 1000 cases recg. X-ray/ECG/EEG/Scan | X-ray/ECG/EEG/Scan |             |            |       | no. per 1000 cases recg. other diagnostic tests | other diagnostic tests |             |            |       |
|                               |                                        | service received |             |            | all   |                                   | service received |             |            | all   |                                             | service received   |             |            | all   |                                                 | service received       |             |            | all   |
|                               |                                        | free             | partly free | on payment |       |                                   | free             | partly free | on payment |       |                                             | free               | partly free | on payment |       |                                                 | free                   | partly free | on payment |       |
| (1)                           | (2)                                    | (3)              | (4)         | (5)        | (6)   | (7)                               | (8)              | (9)         | (10)       | (11)  | (12)                                        | (13)               | (14)        | (15)       | (16)  | (17)                                            | (18)                   | (19)        | (20)       | (21)  |
| public hosp.                  | 213                                    | 662              | 121         | 217        | 1000  | 973                               | 246              | 372         | 382        | 1000  | 569                                         | 387                | 168         | 445        | 1000  | 734                                             | 444                    | 159         | 397        | 1000  |
| public dis.                   | 259                                    | 826              | 25          | 149        | 1000  | 980                               | 332              | 397         | 271        | 1000  | 621                                         | 545                | 159         | 296        | 1000  | 802                                             | 555                    | 183         | 262        | 1000  |
| private hos.                  | 276                                    | 31               | 12          | 957        | 1000  | 972                               | 13               | 14          | 973        | 1000  | 642                                         | 17                 | 9           | 974        | 1000  | 841                                             | 17                     | 9           | 974        | 1000  |
| all                           | 253                                    | 242              | 45          | 713        | 1000  | 973                               | 105              | 152         | 743        | 1000  | 615                                         | 153                | 65          | 781        | 1000  | 802                                             | 171                    | 62          | 767        | 1000  |
| estd. no. of hosp. cases (00) | 21567                                  | 5224             | 965         | 15378      | 21567 | 82847                             | 8681             | 12592       | 61574      | 82847 | 52420                                       | 8046               | 3418        | 40956      | 52420 | 68314                                           | 11682                  | 4258        | 52374      | 68314 |
| sample hosp. cases            | 3307                                   | 855              | 148         | 2304       | 3307  | 11777                             | 1265             | 1824        | 8688       | 11777 | 7656                                        | 1208               | 527         | 5921       | 7656  | 9722                                            | 1788                   | 638         | 7296       | 9722  |

Table (27): Number per 1000 cases of hospitalisation receiving specific types of medical service and their break-up by payment category for different types of hospital

| All-India                     |                                        |                  |             |            |       | Rural +Urban                      |                  |             |            |        |                                             |                    |             |            |       | Males                                           |                        |             |            |        |
|-------------------------------|----------------------------------------|------------------|-------------|------------|-------|-----------------------------------|------------------|-------------|------------|--------|---------------------------------------------|--------------------|-------------|------------|-------|-------------------------------------------------|------------------------|-------------|------------|--------|
| type of hospital              | medical services received as inpatient |                  |             |            |       |                                   |                  |             |            |        |                                             |                    |             |            |       |                                                 |                        |             |            |        |
|                               | no. per 1000 cases recg. surgery       | surgery          |             |            |       | no. per 1000 cases recg. medicine | medicine         |             |            |        | no. per 1000 cases recg. X-ray/ECG/EEG/Scan | X-ray/ECG/EEG/Scan |             |            |       | no. per 1000 cases recg. other diagnostic tests | other diagnostic tests |             |            |        |
|                               |                                        | service received |             |            | all   |                                   | service received |             |            | all    |                                             | service received   |             |            | all   |                                                 | service received       |             |            | all    |
|                               |                                        | free             | partly free | on payment |       |                                   | free             | partly free | on payment |        |                                             | free               | partly free | on payment |       |                                                 | free                   | partly free | on payment |        |
| (1)                           | (2)                                    | (3)              | (4)         | (5)        | (6)   | (7)                               | (8)              | (9)         | (10)       | (11)   | (12)                                        | (13)               | (14)        | (15)       | (16)  | (17)                                            | (18)                   | (19)        | (20)       | (21)   |
| public hosp.                  | 198                                    | 693              | 99          | 208        | 1000  | 964                               | 205              | 406         | 389        | 1000   | 524                                         | 325                | 162         | 513        | 1000  | 712                                             | 393                    | 156         | 451        | 1000   |
| public dis.                   | 232                                    | 684              | 109         | 207        | 1000  | 988                               | 249              | 369         | 382        | 1000   | 605                                         | 456                | 143         | 400        | 1000  | 803                                             | 499                    | 114         | 388        | 1000   |
| private hos.                  | 238                                    | 38               | 20          | 942        | 1000  | 977                               | 10               | 17          | 973        | 1000   | 616                                         | 15                 | 9           | 975        | 1000  | 796                                             | 17                     | 11          | 973        | 1000   |
| all                           | 222                                    | 279              | 49          | 672        | 1000  | 972                               | 90               | 174         | 735        | 1000   | 580                                         | 134                | 66          | 801        | 1000  | 763                                             | 164                    | 66          | 771        | 1000   |
| estd. no. of hosp. cases (00) | 32016                                  | 8930             | 1573        | 21513      | 32016 | 139965                            | 12639            | 24393       | 102933     | 139965 | 83497                                       | 11152              | 5491        | 66854      | 83497 | 109958                                          | 17985                  | 7211        | 84761      | 109958 |
| sample hosp. cases            | 4209                                   | 1166             | 211         | 2832       | 4209  | 16704                             | 1499             | 3022        | 12183      | 16704  | 10322                                       | 1432               | 752         | 8138       | 10322 | 13176                                           | 2306                   | 958         | 9912       | 13176  |

Table (27): Number per 1000 cases of hospitalisation receiving specific types of medical service and their break-up by payment category for different types of hospital

| All-India                     |                                        |                  |             |            |                                   | Rural +Urban |                  |             |                                             |                    |                  | Females |                                                 |                        |             |            |       |      |       |       |
|-------------------------------|----------------------------------------|------------------|-------------|------------|-----------------------------------|--------------|------------------|-------------|---------------------------------------------|--------------------|------------------|---------|-------------------------------------------------|------------------------|-------------|------------|-------|------|-------|-------|
| type of hospital              | medical services received as inpatient |                  |             |            |                                   |              |                  |             |                                             |                    |                  |         |                                                 |                        |             |            |       |      |       |       |
|                               | no. per 1000 cases recg. surgery       | surgery          |             |            | no. per 1000 cases recg. medicine | medicine     |                  |             | no. per 1000 cases recg. X-ray/ECG/EEG/Scan | X-ray/ECG/EEG/Scan |                  |         | no. per 1000 cases recg. other diagnostic tests | other diagnostic tests |             |            |       |      |       |       |
|                               |                                        | service received |             |            |                                   | all          | service received |             |                                             | all                | service received |         |                                                 | all                    |             |            |       |      |       |       |
|                               |                                        | free             | partly free | on payment |                                   |              | free             | partly free |                                             |                    | on payment       | free    |                                                 |                        | partly free | on payment |       |      |       |       |
| (1)                           | (2)                                    | (3)              | (4)         | (5)        | (6)                               | (7)          | (8)              | (9)         | (10)                                        | (11)               | (12)             | (13)    | (14)                                            | (15)                   | (16)        | (17)       | (18)  | (19) | (20)  | (21)  |
| public hosp.                  | 216                                    | 690              | 118         | 192        | 1000                              | 973          | 207              | 390         | 403                                         | 1000               | 480              | 316     | 162                                             | 522                    | 1000        | 698        | 402   | 145  | 453   | 1000  |
| public dis.                   | 279                                    | 617              | 105         | 278        | 1000                              | 979          | 282              | 296         | 422                                         | 1000               | 545              | 383     | 173                                             | 445                    | 1000        | 777        | 454   | 133  | 413   | 1000  |
| private hos.                  | 277                                    | 55               | 8           | 936        | 1000                              | 972          | 17               | 12          | 971                                         | 1000               | 599              | 10      | 9                                               | 981                    | 1000        | 797        | 16    | 7    | 977   | 1000  |
| all                           | 254                                    | 276              | 46          | 678        | 1000                              | 972          | 95               | 162         | 743                                         | 1000               | 552              | 119     | 63                                              | 818                    | 1000        | 758        | 161   | 58   | 781   | 1000  |
| estd. no. of hosp. cases (00) | 32452                                  | 8966             | 1492        | 21994      | 32452                             | 124067       | 11802            | 20116       | 92149                                       | 124067             | 70478            | 8402    | 4450                                            | 57626                  | 70478       | 96761      | 15562 | 5600 | 75599 | 96761 |
| sample hosp. cases            | 4344                                   | 1168             | 195         | 2981       | 4344                              | 14836        | 1358             | 2537        | 10941                                       | 14836              | 8896             | 1162    | 596                                             | 7138                   | 8896        | 11797      | 2057  | 774  | 8966  | 11797 |

Table (27): Number per 1000 cases of hospitalisation receiving specific types of medical service and their break-up by payment category for different types of hospital

| All-India                |                                        | Rural +Urban     |             |            |       |                                   |                  |             |            |        |                                             | Persons            |             |            |        |                                                 |                        |             |            |        |        |
|--------------------------|----------------------------------------|------------------|-------------|------------|-------|-----------------------------------|------------------|-------------|------------|--------|---------------------------------------------|--------------------|-------------|------------|--------|-------------------------------------------------|------------------------|-------------|------------|--------|--------|
| type of hospital         | medical services received as inpatient |                  |             |            |       |                                   |                  |             |            |        |                                             |                    |             |            |        |                                                 |                        |             |            |        |        |
|                          | no. per 1000 cases recg. surgery       | surgery          |             |            |       | no. per 1000 cases recg. medicine | medicine         |             |            |        | no. per 1000 cases recg. X-ray/ECG/EEG/Scan | X-ray/ECG/EEG/Scan |             |            |        | no. per 1000 cases recg. other diagnostic tests | other diagnostic tests |             |            |        |        |
|                          |                                        | service received |             |            | all   |                                   | service received |             |            | all    |                                             | service received   |             |            | all    |                                                 | service received       |             |            | all    |        |
|                          |                                        | free             | partly free | on payment |       |                                   | free             | partly free | on payment |        |                                             | free               | partly free | on payment |        |                                                 | free                   | partly free | on payment |        |        |
| (1)                      | (2)                                    | (3)              | (4)         | (5)        | (6)   | (7)                               | (8)              | (9)         | (10)       | (11)   | (12)                                        | (13)               | (14)        | (15)       | (16)   | (17)                                            | (18)                   | (19)        | (20)       | (21)   |        |
| public hosp.             | 206                                    | 691              | 108         | 200        | 1000  | 968                               | 206              | 398         | 396        | 1000   | 503                                         | 321                | 162         | 517        | 1000   | 705                                             | 397                    | 151         | 452        | 1000   |        |
| public dis.              | 254                                    | 649              | 107         | 243        | 1000  | 984                               | 265              | 334         | 401        | 1000   | 576                                         | 423                | 157         | 420        | 1000   | 790                                             | 478                    | 123         | 399        | 1000   |        |
| private hos.             | 256                                    | 47               | 14          | 939        | 1000  | 974                               | 13               | 14          | 972        | 1000   | 608                                         | 13                 | 9           | 978        | 1000   | 797                                             | 16                     | 9           | 975        | 1000   |        |
| all                      | 237                                    | 278              | 48          | 675        | 1000  | 972                               | 93               | 169         | 739        | 1000   | 567                                         | 127                | 65          | 808        | 1000   | 761                                             | 162                    | 62          | 776        | 1000   |        |
| estd. no. of hosp. cases | (00)                                   | 64468            | 17897       | 3065       | 43507 | 64468                             | 264032           | 24441       | 44509      | 195082 | 264032                                      | 153976             | 19554       | 9941       | 124480 | 153976                                          | 206718                 | 33547       | 12810      | 160360 | 206718 |
| sample hosp. cases       |                                        | 8553             | 2334        | 406        | 5813  | 8553                              | 31540            | 2857        | 5559       | 23124  | 31540                                       | 19218              | 2594        | 1348       | 15276  | 19218                                           | 24973                  | 4363        | 1732       | 18878  | 24973  |



Table (28): Number per 1000 of hospitalisation cases receiving treatment before hospitalisation and per 1000 distribution of such cases by source of treatment availed of for each type of hospital where admitted and sex

| All-India                       |                                                                                      |                                                                    |                                                             |                                       |                  |                |      |       | Rural                                      |        |
|---------------------------------|--------------------------------------------------------------------------------------|--------------------------------------------------------------------|-------------------------------------------------------------|---------------------------------------|------------------|----------------|------|-------|--------------------------------------------|--------|
| type of hospital where admitted | no. per 1000 of hospitalisation cases that received treatment before hospitalisation | average duration of treatment before hospitalisation (in 0.0 days) | hosp. cases receiving treatment before hospitalisation from |                                       |                  |                |      |       | hosp. cases treated before hospitalisation |        |
|                                 |                                                                                      |                                                                    | public hospital (incl. PHC/ sub-centres/ CHC)               | public dispensary (include CGHS/ ESI) | private hospital | private doctor | n.r. | total | estd. no. (00)                             | sample |
| (1)                             | (2)                                                                                  | (3)                                                                | (4)                                                         | (5)                                   | (6)              | (7)            | (8)  | (9)   | (10)                                       | (11)   |
| males                           |                                                                                      |                                                                    |                                                             |                                       |                  |                |      |       |                                            |        |
| public hosp.                    | 515                                                                                  | 101.5                                                              | 488                                                         | 24                                    | 114              | 373            | 2    | 1000  | 20730                                      | 2488   |
| public disp.                    | 478                                                                                  | 42.5                                                               | 184                                                         | 217                                   | 296              | 304            | 0    | 1000  | 701                                        | 95     |
| private hosp.                   | 530                                                                                  | 87.5                                                               | 121                                                         | 14                                    | 324              | 541            | 0    | 1000  | 30495                                      | 3157   |
| all                             | 523                                                                                  | 92.4                                                               | 268                                                         | 21                                    | 240              | 471            | 1    | 1000  | 51968                                      | 5749   |
| females                         |                                                                                      |                                                                    |                                                             |                                       |                  |                |      |       |                                            |        |
| public hosp.                    | 498                                                                                  | 86                                                                 | 453                                                         | 42                                    | 113              | 388            | 3    | 1000  | 17219                                      | 2145   |
| public disp.                    | 509                                                                                  | 100.8                                                              | 154                                                         | 275                                   | 74               | 498            | 0    | 1000  | 744                                        | 72     |
| private hosp.                   | 609                                                                                  | 106.8                                                              | 118                                                         | 17                                    | 329              | 535            | 0    | 1000  | 31086                                      | 3142   |
| all                             | 563                                                                                  | 99.3                                                               | 236                                                         | 30                                    | 249              | 483            | 1    | 1000  | 49136                                      | 5372   |
| persons                         |                                                                                      |                                                                    |                                                             |                                       |                  |                |      |       |                                            |        |
| public hosp.                    | 507                                                                                  | 94.5                                                               | 472                                                         | 32                                    | 114              | 380            | 2    | 1000  | 37949                                      | 4633   |
| public disp.                    | 493                                                                                  | 72.5                                                               | 168                                                         | 247                                   | 182              | 404            | 0    | 1000  | 1446                                       | 167    |
| private hosp.                   | 567                                                                                  | 97.2                                                               | 119                                                         | 16                                    | 327              | 538            | 0    | 1000  | 61581                                      | 6299   |
| all                             | 542                                                                                  | 95.7                                                               | 253                                                         | 25                                    | 244              | 477            | 1    | 1000  | 101103                                     | 11121  |

Table (28): Number per 1000 of hospitalisation cases receiving treatment before hospitalisation and per 1000 distribution of such cases by source of treatment availed of for each type of hospital where admitted and sex

| All-India                       |                                                                                      |                                                                    |                                                             |                                       |                  |                |      |       |                                            | Urban  |
|---------------------------------|--------------------------------------------------------------------------------------|--------------------------------------------------------------------|-------------------------------------------------------------|---------------------------------------|------------------|----------------|------|-------|--------------------------------------------|--------|
| type of hospital where admitted | no. per 1000 of hospitalisation cases that received treatment before hospitalisation | average duration of treatment before hospitalisation (in 0.0 days) | hosp. cases receiving treatment before hospitalisation from |                                       |                  |                |      |       | hosp. cases treated before hospitalisation |        |
|                                 |                                                                                      |                                                                    | public hospital (incl. PHC/ sub-centres/ CHC)               | public dispensary (include CGHS/ ESI) | private hospital | private doctor | n.r. | total | estd. no. (00)                             | sample |
| (1)                             | (2)                                                                                  | (3)                                                                | (4)                                                         | (5)                                   | (6)              | (7)            | (8)  | (9)   | (10)                                       | (11)   |
| males                           |                                                                                      |                                                                    |                                                             |                                       |                  |                |      |       |                                            |        |
| public hosp.                    | 524                                                                                  | 104.9                                                              | 450                                                         | 57                                    | 131              | 361            | 1    | 1000  | 8312                                       | 1296   |
| public disp.                    | 492                                                                                  | 108.6                                                              | 67                                                          | 514                                   | 137              | 282            | 0    | 1000  | 694                                        | 93     |
| private hosp.                   | 579                                                                                  | 95.6                                                               | 85                                                          | 15                                    | 339              | 559            | 1    | 1000  | 15898                                      | 1934   |
| all                             | 557                                                                                  | 99.0                                                               | 206                                                         | 43                                    | 264              | 485            | 1    | 1000  | 24905                                      | 3324   |
| females                         |                                                                                      |                                                                    |                                                             |                                       |                  |                |      |       |                                            |        |
| public hosp.                    | 566                                                                                  | 99.2                                                               | 506                                                         | 25                                    | 93               | 375            | 0    | 1000  | 8015                                       | 1247   |
| public disp.                    | 571                                                                                  | 79.3                                                               | 145                                                         | 411                                   | 195              | 249            | 0    | 1000  | 642                                        | 88     |
| private hosp.                   | 594                                                                                  | 109.6                                                              | 65                                                          | 10                                    | 354              | 571            | 1    | 1000  | 14930                                      | 1979   |
| all                             | 584                                                                                  | 105.2                                                              | 217                                                         | 26                                    | 261              | 496            | 0    | 1000  | 23593                                      | 3315   |
| persons                         |                                                                                      |                                                                    |                                                             |                                       |                  |                |      |       |                                            |        |
| public hosp.                    | 544                                                                                  | 102.1                                                              | 478                                                         | 42                                    | 113              | 368            | 0    | 1000  | 16327                                      | 2543   |
| public disp.                    | 527                                                                                  | 94.5                                                               | 105                                                         | 465                                   | 165              | 266            | 0    | 1000  | 1336                                       | 181    |
| private hosp.                   | 586                                                                                  | 102.3                                                              | 75                                                          | 13                                    | 346              | 565            | 1    | 1000  | 30828                                      | 3913   |
| all                             | 569                                                                                  | 102.0                                                              | 211                                                         | 35                                    | 263              | 490            | 1    | 1000  | 48498                                      | 6639   |

Table (28): Number per 1000 of hospitalisation cases receiving treatment before hospitalisation and per 1000 distribution of such cases by source of treatment availed of for each type of hospital where admitted and sex

| All-India                       |                                                                                      |                                                                    | Rural + Urban                                               |                                       |                  |                |      |       |                                            |        |
|---------------------------------|--------------------------------------------------------------------------------------|--------------------------------------------------------------------|-------------------------------------------------------------|---------------------------------------|------------------|----------------|------|-------|--------------------------------------------|--------|
| type of hospital where admitted | no. per 1000 of hospitalisation cases that received treatment before hospitalisation | average duration of treatment before hospitalisation (in 0.0 days) | hosp. cases receiving treatment before hospitalisation from |                                       |                  |                |      |       | hosp. cases treated before hospitalisation |        |
|                                 |                                                                                      |                                                                    | public hospital (incl. PHC/ sub-centres/ CHC)               | public dispensary (include CGHS/ ESI) | private hospital | private doctor | n.r. | total | estd. no. (00)                             | sample |
| (1)                             | (2)                                                                                  | (3)                                                                | (4)                                                         | (5)                                   | (6)              | (7)            | (8)  | (9)   | (10)                                       | (11)   |
| males                           |                                                                                      |                                                                    |                                                             |                                       |                  |                |      |       |                                            |        |
| public hosp.                    | 518                                                                                  | 102.5                                                              | 477                                                         | 33                                    | 119              | 369            | 2    | 1000  | 29043                                      | 3784   |
| public disp.                    | 485                                                                                  | 75.3                                                               | 126                                                         | 365                                   | 217              | 293            | 0    | 1000  | 1395                                       | 188    |
| private hosp.                   | 546                                                                                  | 90.2                                                               | 109                                                         | 14                                    | 329              | 547            | 1    | 1000  | 46393                                      | 5091   |
| all                             | 534                                                                                  | 94.6                                                               | 248                                                         | 28                                    | 248              | 475            | 1    | 1000  | 76872                                      | 9073   |
| females                         |                                                                                      |                                                                    |                                                             |                                       |                  |                |      |       |                                            |        |
| public hosp.                    | 518                                                                                  | 90.2                                                               | 470                                                         | 37                                    | 107              | 384            | 2    | 1000  | 25233                                      | 3392   |
| public disp.                    | 536                                                                                  | 90.9                                                               | 150                                                         | 338                                   | 130              | 382            | 0    | 1000  | 1387                                       | 160    |
| private hosp.                   | 604                                                                                  | 107.7                                                              | 100                                                         | 15                                    | 337              | 547            | 0    | 1000  | 46016                                      | 5121   |
| all                             | 570                                                                                  | 101.2                                                              | 230                                                         | 29                                    | 253              | 487            | 1    | 1000  | 72729                                      | 8687   |
| persons                         |                                                                                      |                                                                    |                                                             |                                       |                  |                |      |       |                                            |        |
| public hosp.                    | 518                                                                                  | 96.8                                                               | 474                                                         | 35                                    | 113              | 376            | 2    | 1000  | 54276                                      | 7176   |
| public disp.                    | 509                                                                                  | 83.1                                                               | 138                                                         | 351                                   | 173              | 338            | 0    | 1000  | 2782                                       | 348    |
| private hosp.                   | 573                                                                                  | 99                                                                 | 105                                                         | 15                                    | 333              | 547            | 1    | 1000  | 92409                                      | 10212  |
| all                             | 551                                                                                  | 97.8                                                               | 239                                                         | 28                                    | 250              | 481            | 1    | 1000  | 149601                                     | 17760  |

Table (29): Number per 1000 cases of hospitalisation that received treatment after discharge from hospital and per 1000 distribution of such cases by source of treatment availed of for each type of hospital where admitted and sex

| All-India                              |                                                                                     |                                                                   |                                                                                             |                                       |                  |                |      |       |                                     | Rural  |
|----------------------------------------|-------------------------------------------------------------------------------------|-------------------------------------------------------------------|---------------------------------------------------------------------------------------------|---------------------------------------|------------------|----------------|------|-------|-------------------------------------|--------|
| type of hospital from where discharged | no. per 1000 of hospitalisation cases that received treatment after hospitalisation | average duration of treatment after hospitalisation (in 0.0 days) | source of post-discharge treatment for cases which received treatment after hospitalisation |                                       |                  |                |      |       | cases treated after hospitalisation |        |
|                                        |                                                                                     |                                                                   | public hospital (incl. PHC/ sub-centres/ CHC)                                               | public dispensary (include CGHS/ ESI) | private hospital | private doctor | n.r. | total | estd. no. (00)                      | sample |
| (1)                                    | (2)                                                                                 | (3)                                                               | (4)                                                                                         | (5)                                   | (6)              | (7)            | (8)  | (9)   | (10)                                | (11)   |
| males                                  |                                                                                     |                                                                   |                                                                                             |                                       |                  |                |      |       |                                     |        |
| public hosp.                           | 698                                                                                 | 47.9                                                              | 830                                                                                         | 11                                    | 44               | 112            | 3    | 1000  | 28079                               | 3447   |
| public disp.                           | 740                                                                                 | 48.3                                                              | 142                                                                                         | 597                                   | 155              | 106            | 0    | 1000  | 1086                                | 135    |
| private hosp.                          | 792                                                                                 | 45                                                                | 37                                                                                          | 4                                     | 687              | 271            | 0    | 1000  | 45544                               | 4453   |
| all                                    | 753                                                                                 | 46.1                                                              | 336                                                                                         | 15                                    | 437              | 209            | 1    | 1000  | 74750                               | 8045   |
| females                                |                                                                                     |                                                                   |                                                                                             |                                       |                  |                |      |       |                                     |        |
| public hosp.                           | 697                                                                                 | 40.7                                                              | 822                                                                                         | 13                                    | 42               | 122            | 1    | 1000  | 24096                               | 2868   |
| public disp.                           | 687                                                                                 | 33.8                                                              | 100                                                                                         | 629                                   | 101              | 171            | 0    | 1000  | 1005                                | 99     |
| private hosp.                          | 779                                                                                 | 49.9                                                              | 36                                                                                          | 5                                     | 650              | 308            | 1    | 1000  | 39759                               | 3887   |
| all                                    | 744                                                                                 | 46.2                                                              | 329                                                                                         | 17                                    | 416              | 237            | 1    | 1000  | 64919                               | 6867   |
| persons                                |                                                                                     |                                                                   |                                                                                             |                                       |                  |                |      |       |                                     |        |
| public hosp.                           | 698                                                                                 | 44.6                                                              | 826                                                                                         | 12                                    | 43               | 117            | 2    | 1000  | 52176                               | 6315   |
| public disp.                           | 713                                                                                 | 41.3                                                              | 121                                                                                         | 612                                   | 129              | 137            | 0    | 1000  | 2091                                | 234    |
| private hosp.                          | 786                                                                                 | 47.2                                                              | 37                                                                                          | 5                                     | 670              | 289            | 0    | 1000  | 85303                               | 8340   |
| all                                    | 749                                                                                 | 46.1                                                              | 333                                                                                         | 16                                    | 427              | 222            | 1    | 1000  | 139670                              | 14912  |

Table (29): Number per 1000 cases of hospitalisation that received treatment after discharge from hospital and per 1000 distribution of such cases by source of treatment availed of for each type of hospital where admitted and sex

All-India

Urban

| type of hospital from where discharged | no. per 1000 of hospitalisation cases that received treatment after hospitalisation | average duration of treatment after hospitalisation (in 0.0 days) | source of post-discharge treatment for cases which received treatment after hospitalisation |                                       |                  |                |      |       | cases treated after hospitalisation |        |
|----------------------------------------|-------------------------------------------------------------------------------------|-------------------------------------------------------------------|---------------------------------------------------------------------------------------------|---------------------------------------|------------------|----------------|------|-------|-------------------------------------|--------|
|                                        |                                                                                     |                                                                   | public hospital (incl. PHC/ sub-centres/ CHC)                                               | public dispensary (include CGHS/ ESI) | private hospital | private doctor | n.r. | total | estd. no. (00)                      | sample |
| (1)                                    | (2)                                                                                 | (3)                                                               | (4)                                                                                         | (5)                                   | (6)              | (7)            | (8)  | (9)   | (10)                                | (11)   |
| males                                  |                                                                                     |                                                                   |                                                                                             |                                       |                  |                |      |       |                                     |        |
| public hosp.                           | 729                                                                                 | 49.1                                                              | 793                                                                                         | 37                                    | 51               | 118            | 2    | 1000  | 11573                               | 1828   |
| public disp.                           | 835                                                                                 | 34.7                                                              | 33                                                                                          | 811                                   | 80               | 77             | 0    | 1000  | 1178                                | 144    |
| private hosp.                          | 807                                                                                 | 47.8                                                              | 26                                                                                          | 5                                     | 708              | 260            | 1    | 1000  | 22165                               | 2783   |
| all                                    | 780                                                                                 | 47.8                                                              | 280                                                                                         | 43                                    | 469              | 207            | 1    | 1000  | 34921                               | 4757   |
| females                                |                                                                                     |                                                                   |                                                                                             |                                       |                  |                |      |       |                                     |        |
| public hosp.                           | 739                                                                                 | 45.5                                                              | 829                                                                                         | 11                                    | 51               | 108            | 1    | 1000  | 10460                               | 1584   |
| public disp.                           | 862                                                                                 | 39.1                                                              | 114                                                                                         | 722                                   | 127              | 33             | 3    | 1000  | 969                                 | 136    |
| private hosp.                          | 805                                                                                 | 44.1                                                              | 20                                                                                          | 3                                     | 689              | 287            | 1    | 1000  | 20234                               | 2570   |
| all                                    | 783                                                                                 | 44.4                                                              | 290                                                                                         | 28                                    | 461              | 220            | 1    | 1000  | 31666                               | 4292   |
| persons                                |                                                                                     |                                                                   |                                                                                             |                                       |                  |                |      |       |                                     |        |
| public hosp.                           | 734                                                                                 | 47.4                                                              | 810                                                                                         | 25                                    | 51               | 113            | 2    | 1000  | 22033                               | 3412   |
| public disp.                           | 847                                                                                 | 36.7                                                              | 69                                                                                          | 771                                   | 101              | 57             | 1    | 1000  | 2148                                | 280    |
| private hosp.                          | 806                                                                                 | 46                                                                | 23                                                                                          | 4                                     | 699              | 273            | 1    | 1000  | 42399                               | 5353   |
| all                                    | 782                                                                                 | 46.2                                                              | 285                                                                                         | 36                                    | 465              | 213            | 1    | 1000  | 66587                               | 9049   |

Table (29): Number per 1000 cases of hospitalisation that received treatment after discharge from hospital and per 1000 distribution of such cases by source of treatment availed of for each type of hospital where admitted and sex

| All-India Rural + Urban                |                                                                                     |                                                                   |                                                                                             |                                       |                  |                |      |       |                                     |        |
|----------------------------------------|-------------------------------------------------------------------------------------|-------------------------------------------------------------------|---------------------------------------------------------------------------------------------|---------------------------------------|------------------|----------------|------|-------|-------------------------------------|--------|
| type of hospital from where discharged | no. per 1000 of hospitalisation cases that received treatment after hospitalisation | average duration of treatment after hospitalisation (in 0.0 days) | source of post-discharge treatment for cases which received treatment after hospitalisation |                                       |                  |                |      |       | cases treated after hospitalisation |        |
|                                        |                                                                                     |                                                                   | public hospital (incl. PHC/ sub-centres/ CHC)                                               | public dispensary (include CGHS/ ESI) | private hospital | private doctor | n.r. | total | estd. no. (00)                      | sample |
| (1)                                    | (2)                                                                                 | (3)                                                               | (4)                                                                                         | (5)                                   | (6)              | (7)            | (8)  | (9)   | (10)                                | (11)   |
| males                                  |                                                                                     |                                                                   |                                                                                             |                                       |                  |                |      |       |                                     |        |
| public hosp.                           | 707                                                                                 | 48.3                                                              | 819                                                                                         | 19                                    | 46               | 114            | 3    | 1000  | 39653                               | 5275   |
| public disp.                           | 787                                                                                 | 41.2                                                              | 85                                                                                          | 708                                   | 116              | 91             | 0    | 1000  | 2264                                | 279    |
| private hosp.                          | 797                                                                                 | 45.9                                                              | 33                                                                                          | 5                                     | 694              | 268            | 1    | 1000  | 67709                               | 7236   |
| all                                    | 761                                                                                 | 46.6                                                              | 318                                                                                         | 24                                    | 448              | 208            | 1    | 1000  | 109671                              | 12802  |
| females                                |                                                                                     |                                                                   |                                                                                             |                                       |                  |                |      |       |                                     |        |
| public hosp.                           | 709                                                                                 | 42.2                                                              | 824                                                                                         | 12                                    | 45               | 118            | 1    | 1000  | 34556                               | 4452   |
| public disp.                           | 763                                                                                 | 36.4                                                              | 107                                                                                         | 675                                   | 114              | 103            | 2    | 1000  | 1974                                | 235    |
| private hosp.                          | 787                                                                                 | 47.9                                                              | 31                                                                                          | 4                                     | 663              | 301            | 1    | 1000  | 59994                               | 6457   |
| all                                    | 756                                                                                 | 45.6                                                              | 316                                                                                         | 21                                    | 431              | 232            | 1    | 1000  | 96586                               | 11159  |
| persons                                |                                                                                     |                                                                   |                                                                                             |                                       |                  |                |      |       |                                     |        |
| public hosp.                           | 708                                                                                 | 45.4                                                              | 821                                                                                         | 16                                    | 45               | 116            | 2    | 1000  | 74209                               | 9727   |
| public disp.                           | 775                                                                                 | 39                                                                | 95                                                                                          | 693                                   | 115              | 97             | 1    | 1000  | 4239                                | 514    |
| private hosp.                          | 792                                                                                 | 46.8                                                              | 32                                                                                          | 5                                     | 680              | 283            | 1    | 1000  | 127702                              | 13693  |
| all                                    | 759                                                                                 | 46.2                                                              | 317                                                                                         | 23                                    | 440              | 219            | 1    | 1000  | 206257                              | 23961  |

Table (30): Average total medical expenditure (Rs.) for treatment per hospitalisation case during the stay at hospital (as inpatient) for last 365 days by type of hospital (Govt./Pvt), mpce class and sex

| All-India<br>mpce class          | average total medical expenditure for treatment (Rs.) per case |                     |                                           |                             |                     |                                           |                             |                     |                                        | Rural                           |        |
|----------------------------------|----------------------------------------------------------------|---------------------|-------------------------------------------|-----------------------------|---------------------|-------------------------------------------|-----------------------------|---------------------|----------------------------------------|---------------------------------|--------|
|                                  | males                                                          |                     |                                           | females                     |                     |                                           | persons                     |                     |                                        | no. of cases of hospitalisation |        |
|                                  | type of hospital                                               |                     |                                           | type of hospital            |                     |                                           | type of hospital            |                     |                                        |                                 |        |
|                                  | govern-<br>ment<br>hospital                                    | private<br>hospital | all<br>hospitals<br>(incl. n.r.<br>cases) | govern-<br>ment<br>hospital | private<br>hospital | all<br>hospitals<br>(incl. n.r.<br>cases) | govern-<br>ment<br>hospital | private<br>hospital | all hospitals<br>(incl. n.r.<br>cases) | estd.<br>(00)                   | sample |
| (1)                              | (2)                                                            | (3)                 | (4)                                       | (5)                         | (6)                 | (7)                                       | (8)                         | (9)                 | (10)                                   | (11)                            | (12)   |
| 0 – 225                          | 2206                                                           | 5247                | 3428                                      | 2862                        | 5689                | 3794                                      | 2530                        | 5431                | 3598                                   | 5469                            | 702    |
| 225 – 255                        | 2584                                                           | 6236                | 4107                                      | 3701                        | 3883                | 3786                                      | 3173                        | 4886                | 3931                                   | 4577                            | 553    |
| 255 – 300                        | 2294                                                           | 5213                | 3648                                      | 1841                        | 5942                | 3731                                      | 2087                        | 5543                | 3686                                   | 10188                           | 1348   |
| 300 – 340                        | 3410                                                           | 6532                | 5010                                      | 2384                        | 4788                | 3568                                      | 2950                        | 5777                | 4373                                   | 11216                           | 1367   |
| 340 – 380                        | 2705                                                           | 5153                | 4022                                      | 2464                        | 5365                | 3857                                      | 2586                        | 5245                | 3945                                   | 12839                           | 1512   |
| 380 – 420                        | 2132                                                           | 6992                | 4464                                      | 2043                        | 6776                | 4432                                      | 2094                        | 6895                | 4450                                   | 16686                           | 1806   |
| 420 – 470                        | 3645                                                           | 6498                | 5164                                      | 1939                        | 5601                | 4165                                      | 2884                        | 6028                | 4674                                   | 16252                           | 1876   |
| 470 – 525                        | 3389                                                           | 6676                | 5156                                      | 2580                        | 6878                | 5143                                      | 3017                        | 6781                | 5149                                   | 19670                           | 2216   |
| 525 – 615                        | 3559                                                           | 7648                | 6054                                      | 3446                        | 5797                | 4895                                      | 3509                        | 6811                | 5532                                   | 21763                           | 2339   |
| 615 – 775                        | 4471                                                           | 7300                | 6381                                      | 3539                        | 7358                | 6118                                      | 4049                        | 7327                | 6262                                   | 26486                           | 2641   |
| 775 – 950                        | 4621                                                           | 12009               | 9657                                      | 3782                        | 7623                | 6341                                      | 4192                        | 9843                | 8001                                   | 13464                           | 1377   |
| 950 +                            | 7857                                                           | 9893                | 9427                                      | 4724                        | 11777               | 10062                                     | 6374                        | 10749               | 9718                                   | 20582                           | 1785   |
| all classes                      | 3550                                                           | 7640                | 5946                                      | 2874                        | 7145                | 5406                                      | 3238                        | 7408                | 5695                                   | 179191                          | 19522  |
| estd. no. of hosp.<br>cases (00) | 39575                                                          | 56057               | 95674                                     | 33907                       | 49513               | 83517                                     | 73482                       | 105570              | 179191                                 | X                               | X      |
| sample no. of<br>hosp. cases     | 4944                                                           | 5506                | 10461                                     | 4152                        | 4891                | 9061                                      | 9096                        | 10397               | 19522                                  | X                               | X      |

Table (30): Average total medical expenditure (Rs.) for treatment per hospitalisation case during the stay at hospital (as inpatient) for last 365 days by type of hospital (Govt./Pvt), mpce class and sex

| All-India<br>mpce class       | average total medical expenditure for treatment (Rs.) per case |                  |                                  |                     |                  |                                  |                     |                  |                                  | Urban                           |        |
|-------------------------------|----------------------------------------------------------------|------------------|----------------------------------|---------------------|------------------|----------------------------------|---------------------|------------------|----------------------------------|---------------------------------|--------|
|                               | males                                                          |                  |                                  | females             |                  |                                  | persons             |                  |                                  | no. of cases of hospitalisation |        |
|                               | type of hospital                                               |                  |                                  | type of hospital    |                  |                                  | type of hospital    |                  |                                  |                                 |        |
|                               | government hospital                                            | private hospital | all hospitals (incl. n.r. cases) | government hospital | private hospital | all hospitals (incl. n.r. cases) | government hospital | private hospital | all hospitals (incl. n.r. cases) | estd. (00)                      | sample |
| (1)                           | (2)                                                            | (3)              | (4)                              | (5)                 | (6)              | (7)                              | (8)                 | (9)              | (10)                             | (11)                            | (12)   |
| 0 – 300                       | 1961                                                           | 10862            | 5637                             | 1395                | 7880             | 4412                             | 1746                | 9576             | 5144                             | 2032                            | 287    |
| 300 – 350                     | 1609                                                           | 2978             | 2136                             | 1673                | 3707             | 2514                             | 1640                | 3357             | 2325                             | 1455                            | 204    |
| 350 – 425                     | 3661                                                           | 4662             | 4086                             | 1415                | 5050             | 3008                             | 2594                | 4852             | 3567                             | 4188                            | 597    |
| 425 – 500                     | 2887                                                           | 8014             | 5365                             | 2477                | 8554             | 5249                             | 2690                | 8258             | 5311                             | 7793                            | 1078   |
| 500 – 575                     | 2806                                                           | 6557             | 4847                             | 2022                | 5618             | 3487                             | 2365                | 6158             | 4171                             | 3952                            | 550    |
| 575 – 665                     | 3030                                                           | 6435             | 5159                             | 2940                | 4509             | 3930                             | 2984                | 5442             | 4528                             | 7719                            | 975    |
| 665 – 775                     | 3545                                                           | 12426            | 9452                             | 2472                | 8397             | 5846                             | 3011                | 10823            | 7883                             | 9262                            | 1291   |
| 775 – 915                     | 5653                                                           | 8040             | 7177                             | 2887                | 8108             | 6282                             | 4304                | 8074             | 6733                             | 8775                            | 1275   |
| 915 – 1120                    | 4896                                                           | 10712            | 8846                             | 5567                | 9622             | 8405                             | 5226                | 10149            | 8622                             | 9635                            | 1461   |
| 1120 – 1500                   | 6476                                                           | 15392            | 13244                            | 3912                | 11770            | 10058                            | 5402                | 13758            | 11830                            | 11545                           | 1668   |
| 1500 – 1925                   | 4214                                                           | 18401            | 16275                            | 12960               | 14431            | 14236                            | 8231                | 16433            | 15275                            | 3849                            | 536    |
| 1925 +                        | 9757                                                           | 24574            | 22535                            | 21457               | 21469            | 21468                            | 15132               | 22918            | 21976                            | 6800                            | 935    |
| all classes                   | 4135                                                           | 12448            | 9535                             | 3600                | 10580            | 8112                             | 3877                | 11553            | 8851                             | 77005                           | 10857  |
| estd. no. of hosp. cases (00) | 14020                                                          | 25983            | 40009                            | 13074               | 23906            | 36995                            | 27094               | 49889            | 77005                            | X                               | X      |
| sample no. of hosp. cases     | 2342                                                           | 3296             | 5641                             | 2081                | 3131             | 5216                             | 4423                | 6427             | 10857                            | X                               | X      |



Table (30): Average total medical expenditure (Rs.) for treatment per hospitalisation case during the stay at hospital (as inpatient) for last 365 days by type of hospital (Govt./Pvt), mpce class and sex

| All-India                     |                                                                |                  |                                  |                     |                  |                                  |                     |                  |                                  | Rural + Urban                   |        |
|-------------------------------|----------------------------------------------------------------|------------------|----------------------------------|---------------------|------------------|----------------------------------|---------------------|------------------|----------------------------------|---------------------------------|--------|
| mpce class                    | average total medical expenditure for treatment (Rs.) per case |                  |                                  |                     |                  |                                  |                     |                  |                                  | no. of cases of hospitalisation |        |
|                               | males                                                          |                  |                                  | females             |                  |                                  | persons             |                  |                                  |                                 |        |
|                               | type of hospital                                               |                  |                                  | type of hospital    |                  |                                  | type of hospital    |                  |                                  |                                 |        |
|                               | government hospital                                            | private hospital | all hospitals (incl. n.r. cases) | government hospital | private hospital | all hospitals (incl. n.r. cases) | government hospital | private hospital | all hospitals (incl. n.r. cases) | estd. (00)                      | sample |
| (1)                           | (2)                                                            | (3)              | (4)                              | (5)                 | (6)              | (7)                              | (8)                 | (9)              | (10)                             | (11)                            | (12)   |
| 0 – 235                       | 2135                                                           | 6926             | 4076                             | 2563                | 6373             | 3944                             | 2334                | 6694             | 4017                             | 7501                            | 989    |
| 235 – 265                     | 2320                                                           | 5442             | 3596                             | 3210                | 3847             | 3499                             | 2781                | 4546             | 3544                             | 6031                            | 757    |
| 265 – 320                     | 2699                                                           | 5067             | 3771                             | 1708                | 5681             | 3512                             | 2241                | 5352             | 3651                             | 14376                           | 1945   |
| 320 – 365                     | 3194                                                           | 7101             | 5151                             | 2426                | 6306             | 4282                             | 2839                | 6751             | 4757                             | 19009                           | 2445   |
| 365 – 410                     | 2727                                                           | 5470             | 4206                             | 2342                | 5421             | 3765                             | 2531                | 5449             | 3999                             | 16791                           | 2062   |
| 410 – 460                     | 2333                                                           | 6801             | 4662                             | 2301                | 5858             | 4255                             | 2319                | 6354             | 4475                             | 24405                           | 2781   |
| 460 – 520                     | 3614                                                           | 9111             | 6825                             | 2129                | 6499             | 4730                             | 2926                | 7870             | 5839                             | 25515                           | 3167   |
| 520 – 605                     | 3974                                                           | 7148             | 5778                             | 2666                | 7282             | 5495                             | 3362                | 7216             | 5638                             | 28445                           | 3491   |
| 605 – 730                     | 3888                                                           | 8586             | 6846                             | 4044                | 7184             | 6064                             | 3960                | 7922             | 6480                             | 31397                           | 3800   |
| 730 – 980                     | 4968                                                           | 9994             | 8491                             | 3622                | 8816             | 7296                             | 4368                | 9461             | 7952                             | 38031                           | 4309   |
| 980 – 1285                    | 4572                                                           | 13711            | 11148                            | 4701                | 9446             | 8072                             | 4637                | 11602            | 9618                             | 17313                           | 1913   |
| 1285 +                        | 8139                                                           | 13491            | 12375                            | 7091                | 14768            | 13190                            | 7645                | 14099            | 12762                            | 27382                           | 2720   |
| all classes                   | 3703                                                           | 9163             | 7004                             | 3076                | 8264             | 6237                             | 3410                | 8738             | 6643                             | 256196                          | 30379  |
| estd. no. of hosp. cases (00) | 53595                                                          | 82039            | 135684                           | 46981               | 73419            | 120513                           | 100576              | 155459           | 256196                           | X                               | X      |
| sample no. of hosp. cases     | 7286                                                           | 8802             | 16102                            | 6233                | 8022             | 14277                            | 13519               | 16824            | 30379                            | X                               | X      |

## Appendix A

Table (31): Average expenditure (Rs.) per hospitalisation case on account of hospitalisation for each mpce class and sex

| All-India<br>mpce class                            | Males                                                                |                                                   |                                             | loss of<br>household<br>income (Rs.)<br>due to hospi-<br>talisation | estd.<br>total<br>expen-<br>diture<br>(000) for<br>hospi-<br>talisation | Rural                    |             |
|----------------------------------------------------|----------------------------------------------------------------------|---------------------------------------------------|---------------------------------------------|---------------------------------------------------------------------|-------------------------------------------------------------------------|--------------------------|-------------|
|                                                    | average total expenditure (Rs.) on account of<br>hospitalisation     |                                                   |                                             |                                                                     |                                                                         | hospitalisation<br>cases |             |
|                                                    | medical<br>expenditure<br>on treatment<br>during stay at<br>hospital | other expenses<br>incurred for<br>hospitalisation | total<br>expenditure for<br>hospitalisation |                                                                     |                                                                         | estd. no.<br>(00)        | sam-<br>ple |
| (1)                                                | (2)                                                                  | (3)                                               | (4)                                         | (5)                                                                 | (6)                                                                     | (7)                      | (8)         |
| 0 – 225                                            | 3428                                                                 | 364                                               | 3792                                        | 468                                                                 | 1109714                                                                 | 2926                     | 393         |
| 225 – 255                                          | 4107                                                                 | 446                                               | 4552                                        | 741                                                                 | 942940                                                                  | 2071                     | 294         |
| 255 – 300                                          | 3648                                                                 | 376                                               | 4025                                        | 586                                                                 | 2236714                                                                 | 5557                     | 740         |
| 300 – 340                                          | 5010                                                                 | 505                                               | 5515                                        | 812                                                                 | 3452510                                                                 | 6260                     | 753         |
| 340 – 380                                          | 4022                                                                 | 512                                               | 4534                                        | 722                                                                 | 3130709                                                                 | 6905                     | 817         |
| 380 – 420                                          | 4464                                                                 | 506                                               | 4971                                        | 624                                                                 | 4677799                                                                 | 9411                     | 970         |
| 420 – 470                                          | 5164                                                                 | 461                                               | 5625                                        | 775                                                                 | 4657609                                                                 | 8280                     | 986         |
| 470 – 525                                          | 5156                                                                 | 510                                               | 5665                                        | 764                                                                 | 5637824                                                                 | 9951                     | 1143        |
| 525 – 615                                          | 6054                                                                 | 519                                               | 6574                                        | 757                                                                 | 7861199                                                                 | 11959                    | 1287        |
| 615 – 775                                          | 6381                                                                 | 581                                               | 6963                                        | 898                                                                 | 10074240                                                                | 14469                    | 1417        |
| 775 – 950                                          | 9657                                                                 | 795                                               | 10451                                       | 821                                                                 | 7043219                                                                 | 6739                     | 707         |
| 950 +                                              | 9427                                                                 | 737                                               | 10164                                       | 809                                                                 | 11327808                                                                | 11145                    | 954         |
| all classes                                        | 5946                                                                 | 550                                               | 6496                                        | 760                                                                 | 62152284                                                                | 95674                    | 10461       |
| estd. total exp.<br>(000) for hospita-<br>lisation | 56889402                                                             | 5262882                                           | 62152284                                    | 7271251                                                             | X                                                                       | X                        | X           |

Table (31): Average expenditure (Rs.) per hospitalisation case on account of hospitalisation for each mpce class and sex

| All-India<br>mpce class                            | Females                                                              |                                                   |                                             | loss of<br>household<br>income (Rs.)<br>due to hospi-<br>talisation | estd.<br>total<br>expen-<br>diture<br>(000) for<br>hospi-<br>talisation | Rural                    |             |
|----------------------------------------------------|----------------------------------------------------------------------|---------------------------------------------------|---------------------------------------------|---------------------------------------------------------------------|-------------------------------------------------------------------------|--------------------------|-------------|
|                                                    | average total expenditure (Rs.) on account of<br>hospitalisation     |                                                   |                                             |                                                                     |                                                                         | hospitalisation<br>cases |             |
|                                                    | medical<br>expenditure<br>on treatment<br>during stay at<br>hospital | other expenses<br>incurred for<br>hospitalisation | total<br>expenditure for<br>hospitalisation |                                                                     |                                                                         | estd. no.<br>(00)        | sam-<br>ple |
| (1)                                                | (2)                                                                  | (3)                                               | (4)                                         | (5)                                                                 | (6)                                                                     | (7)                      | (8)         |
| 0 – 225                                            | 3794                                                                 | 393                                               | 4186                                        | 508                                                                 | 1064259                                                                 | 2542                     | 309         |
| 225 – 255                                          | 3786                                                                 | 548                                               | 4334                                        | 301                                                                 | 1085824                                                                 | 2505                     | 259         |
| 255 – 300                                          | 3731                                                                 | 305                                               | 4036                                        | 401                                                                 | 1868653                                                                 | 4630                     | 608         |
| 300 – 340                                          | 3568                                                                 | 347                                               | 3916                                        | 382                                                                 | 1940571                                                                 | 4956                     | 614         |
| 340 – 380                                          | 3857                                                                 | 453                                               | 4310                                        | 347                                                                 | 2557178                                                                 | 5934                     | 695         |
| 380 – 420                                          | 4432                                                                 | 447                                               | 4879                                        | 424                                                                 | 3549379                                                                 | 7275                     | 836         |
| 420 – 470                                          | 4165                                                                 | 431                                               | 4597                                        | 547                                                                 | 3664487                                                                 | 7972                     | 890         |
| 470 – 525                                          | 5143                                                                 | 506                                               | 5649                                        | 625                                                                 | 5490017                                                                 | 9719                     | 1073        |
| 525 – 615                                          | 4895                                                                 | 480                                               | 5375                                        | 467                                                                 | 5269480                                                                 | 9804                     | 1052        |
| 615 – 775                                          | 6118                                                                 | 696                                               | 6814                                        | 498                                                                 | 8189161                                                                 | 12018                    | 1224        |
| 775 – 950                                          | 6341                                                                 | 523                                               | 6865                                        | 587                                                                 | 4616416                                                                 | 6725                     | 670         |
| 950 +                                              | 10062                                                                | 638                                               | 10700                                       | 559                                                                 | 10097137                                                                | 9437                     | 831         |
| all classes                                        | 5406                                                                 | 508                                               | 5914                                        | 493                                                                 | 49392564                                                                | 83517                    | 9061        |
| estd. total exp.<br>(000) for hospita-<br>lisation | 45152014                                                             | 4240549                                           | 49392564                                    | 4116921                                                             | X                                                                       | X                        | X           |

Table (31): Average expenditure (Rs.) per hospitalisation case on account of hospitalisation for each mpce class and sex

| All-India<br>mpce class                            | Persons                                                              |                                                   |                                             | loss of<br>household<br>income (Rs.)<br>due to hospi-<br>talisation | estd.<br>total<br>expen-<br>diture<br>(000) for<br>hospi-<br>talisation | Rural                    |             |
|----------------------------------------------------|----------------------------------------------------------------------|---------------------------------------------------|---------------------------------------------|---------------------------------------------------------------------|-------------------------------------------------------------------------|--------------------------|-------------|
|                                                    | average total expenditure (Rs.) on account of<br>hospitalisation     |                                                   |                                             |                                                                     |                                                                         | hospitalisation<br>cases |             |
|                                                    | medical<br>expenditure<br>on treatment<br>during stay at<br>hospital | other expenses<br>incurred for<br>hospitalisation | total<br>expenditure for<br>hospitalisation |                                                                     |                                                                         | estd. no.<br>(00)        | sam-<br>ple |
| (1)                                                | (2)                                                                  | (3)                                               | (4)                                         | (5)                                                                 | (6)                                                                     | (7)                      | (8)         |
| 0 – 225                                            | 3598                                                                 | 377                                               | 3975                                        | 486                                                                 | 2173973                                                                 | 5469                     | 702         |
| 225 – 255                                          | 3931                                                                 | 502                                               | 4433                                        | 500                                                                 | 2028763                                                                 | 4577                     | 553         |
| 255 – 300                                          | 3686                                                                 | 344                                               | 4030                                        | 502                                                                 | 4105367                                                                 | 10188                    | 1348        |
| 300 – 340                                          | 4373                                                                 | 436                                               | 4808                                        | 622                                                                 | 5393081                                                                 | 11216                    | 1367        |
| 340 – 380                                          | 3945                                                                 | 485                                               | 4430                                        | 549                                                                 | 5687887                                                                 | 12839                    | 1512        |
| 380 – 420                                          | 4450                                                                 | 480                                               | 4930                                        | 537                                                                 | 8227179                                                                 | 16686                    | 1806        |
| 420 – 470                                          | 4674                                                                 | 446                                               | 5121                                        | 663                                                                 | 8322096                                                                 | 16252                    | 1876        |
| 470 – 525                                          | 5149                                                                 | 508                                               | 5657                                        | 696                                                                 | 11127840                                                                | 19670                    | 2216        |
| 525 – 615                                          | 5532                                                                 | 502                                               | 6034                                        | 626                                                                 | 13130679                                                                | 21763                    | 2339        |
| 615 – 775                                          | 6262                                                                 | 633                                               | 6895                                        | 716                                                                 | 18263402                                                                | 26486                    | 2641        |
| 775 – 950                                          | 8001                                                                 | 659                                               | 8660                                        | 704                                                                 | 11659636                                                                | 13464                    | 1377        |
| 950 +                                              | 9718                                                                 | 692                                               | 10410                                       | 695                                                                 | 21424945                                                                | 20582                    | 1785        |
| all classes                                        | 5695                                                                 | 530                                               | 6225                                        | 636                                                                 | 111544848                                                               | 179191                   | 19522       |
| estd. total exp.<br>(000) for hospita-<br>lisation | 102041416                                                            | 9503432                                           | 111544848                                   | 11388172                                                            | X                                                                       | X                        | X           |

Table (31): Average expenditure (Rs.) per hospitalisation case on account of hospitalisation for each mpce class and sex

| All-India<br>mpce class                            | Males                                                                |                                                   |                                             | loss of<br>household<br>income (Rs.)<br>due to hospi-<br>talisation | estd.<br>total<br>expen-<br>diture<br>(000) for<br>hospi-<br>talisation | Urban                    |             |
|----------------------------------------------------|----------------------------------------------------------------------|---------------------------------------------------|---------------------------------------------|---------------------------------------------------------------------|-------------------------------------------------------------------------|--------------------------|-------------|
|                                                    | average total expenditure (Rs.) on account of<br>hospitalisation     |                                                   |                                             |                                                                     |                                                                         | hospitalisation<br>cases |             |
|                                                    | medical<br>expenditure<br>on treatment<br>during stay at<br>hospital | other expenses<br>incurred for<br>hospitalisation | total<br>expenditure for<br>hospitalisation |                                                                     |                                                                         | estd. no.<br>(00)        | sam-<br>ple |
| (1)                                                | (2)                                                                  | (3)                                               | (4)                                         | (5)                                                                 | (6)                                                                     | (7)                      | (8)         |
| 0 – 300                                            | 5637                                                                 | 214                                               | 5850                                        | 687                                                                 | 710826                                                                  | 1215                     | 170         |
| 300 – 350                                          | 2136                                                                 | 201                                               | 2337                                        | 451                                                                 | 169335                                                                  | 725                      | 110         |
| 350 – 425                                          | 4086                                                                 | 366                                               | 4451                                        | 1413                                                                | 967575                                                                  | 2174                     | 314         |
| 425 – 500                                          | 5365                                                                 | 341                                               | 5705                                        | 740                                                                 | 2361804                                                                 | 4140                     | 563         |
| 500 – 575                                          | 4847                                                                 | 358                                               | 5205                                        | 594                                                                 | 1034723                                                                 | 1988                     | 283         |
| 575 – 665                                          | 5159                                                                 | 317                                               | 5476                                        | 807                                                                 | 2057950                                                                 | 3758                     | 497         |
| 665 – 775                                          | 9452                                                                 | 531                                               | 9983                                        | 891                                                                 | 5223424                                                                 | 5232                     | 717         |
| 775 – 915                                          | 7177                                                                 | 320                                               | 7497                                        | 772                                                                 | 3316490                                                                 | 4424                     | 644         |
| 915 – 1120                                         | 8846                                                                 | 426                                               | 9273                                        | 1079                                                                | 4391785                                                                 | 4736                     | 722         |
| 1120 – 1500                                        | 13244                                                                | 1010                                              | 14254                                       | 1879                                                                | 9154925                                                                 | 6423                     | 910         |
| 1500 – 1925                                        | 16275                                                                | 723                                               | 16999                                       | 895                                                                 | 3333078                                                                 | 1961                     | 252         |
| 1925 +                                             | 22535                                                                | 984                                               | 23519                                       | 1369                                                                | 7606889                                                                 | 3234                     | 459         |
| all classes                                        | 9535                                                                 | 545                                               | 10080                                       | 1073                                                                | 40328805                                                                | 40009                    | 5641        |
| estd. total exp.<br>(000) for hospita-<br>lisation | 38147506                                                             | 2181299                                           | 40328805                                    | 4294445                                                             | X                                                                       | X                        | X           |

Table (31): Average expenditure (Rs.) per hospitalisation case on account of hospitalisation for each mpce class and sex

| All-India<br>mpce class                    | Females                                                       |                                             |                                       | loss of household income (Rs.) due to hospitalisation | estd. total expenditure (000) for hospitalisation | Urban                 |        |
|--------------------------------------------|---------------------------------------------------------------|---------------------------------------------|---------------------------------------|-------------------------------------------------------|---------------------------------------------------|-----------------------|--------|
|                                            | average total expenditure (Rs.) on account of hospitalisation |                                             |                                       |                                                       |                                                   | hospitalisation cases |        |
|                                            | medical expenditure on treatment during stay at hospital      | other expenses incurred for hospitalisation | total expenditure for hospitalisation |                                                       |                                                   | estd. no. (00)        | sample |
| (1)                                        | (2)                                                           | (3)                                         | (4)                                   | (5)                                                   | (6)                                               | (7)                   | (8)    |
| 0 – 300                                    | 4412                                                          | 314                                         | 4726                                  | 354                                                   | 386196                                            | 817                   | 117    |
| 300 – 350                                  | 2514                                                          | 115                                         | 2629                                  | 249                                                   | 191921                                            | 730                   | 94     |
| 350 – 425                                  | 3008                                                          | 239                                         | 3247                                  | 281                                                   | 653994                                            | 2014                  | 283    |
| 425 – 500                                  | 5249                                                          | 375                                         | 5625                                  | 398                                                   | 2054567                                           | 3653                  | 515    |
| 500 – 575                                  | 3487                                                          | 308                                         | 3794                                  | 441                                                   | 745270                                            | 1964                  | 267    |
| 575 – 665                                  | 3930                                                          | 235                                         | 4164                                  | 247                                                   | 1649481                                           | 3961                  | 478    |
| 665 – 775                                  | 5846                                                          | 267                                         | 6113                                  | 425                                                   | 2463704                                           | 4030                  | 574    |
| 775 – 915                                  | 6282                                                          | 338                                         | 6620                                  | 349                                                   | 2880076                                           | 4351                  | 631    |
| 915 – 1120                                 | 8405                                                          | 546                                         | 8951                                  | 505                                                   | 4384493                                           | 4899                  | 739    |
| 1120 – 1500                                | 10058                                                         | 989                                         | 11047                                 | 352                                                   | 5658412                                           | 5122                  | 758    |
| 1500 – 1925                                | 14236                                                         | 465                                         | 14701                                 | 485                                                   | 2776306                                           | 1888                  | 284    |
| 1925 +                                     | 21468                                                         | 851                                         | 22318                                 | 478                                                   | 7958234                                           | 3566                  | 476    |
| all classes                                | 8112                                                          | 485                                         | 8596                                  | 391                                                   | 31802653                                          | 36995                 | 5216   |
| estd. total exp. (000) for hospitalisation | 30010203                                                      | 1792450                                     | 31802653                              | 1446166                                               | X                                                 | X                     | X      |

Table (31): Average expenditure (Rs.) per hospitalisation case on account of hospitalisation for each mpce class and sex

| All-India<br>mpce class                    | Persons                                                       |                                             |                                       | loss of household income (Rs.) due to hospitalisation | estd. total expenditure (000) for hospitalisation | Urban                 |        |
|--------------------------------------------|---------------------------------------------------------------|---------------------------------------------|---------------------------------------|-------------------------------------------------------|---------------------------------------------------|-----------------------|--------|
|                                            | average total expenditure (Rs.) on account of hospitalisation |                                             |                                       |                                                       |                                                   | hospitalisation cases |        |
|                                            | medical expenditure on treatment during stay at hospital      | other expenses incurred for hospitalisation | total expenditure for hospitalisation |                                                       |                                                   | estd. no. (00)        | sample |
| (1)                                        | (2)                                                           | (3)                                         | (4)                                   | (5)                                                   | (6)                                               | (7)                   | (8)    |
| 0 – 300                                    | 5144                                                          | 254                                         | 5398                                  | 553                                                   | 1097022                                           | 2032                  | 287    |
| 300 – 350                                  | 2325                                                          | 158                                         | 2483                                  | 350                                                   | 361256                                            | 1455                  | 204    |
| 350 – 425                                  | 3567                                                          | 305                                         | 3872                                  | 868                                                   | 1621569                                           | 4188                  | 597    |
| 425 – 500                                  | 5311                                                          | 357                                         | 5667                                  | 580                                                   | 4416370                                           | 7793                  | 1078   |
| 500 – 575                                  | 4171                                                          | 333                                         | 4504                                  | 518                                                   | 1779993                                           | 3952                  | 550    |
| 575 – 665                                  | 4528                                                          | 275                                         | 4803                                  | 520                                                   | 3707432                                           | 7719                  | 975    |
| 665 – 775                                  | 7883                                                          | 416                                         | 8299                                  | 688                                                   | 7687128                                           | 9262                  | 1291   |
| 775 – 915                                  | 6733                                                          | 329                                         | 7062                                  | 562                                                   | 6196566                                           | 8775                  | 1275   |
| 915 – 1120                                 | 8622                                                          | 487                                         | 9109                                  | 787                                                   | 8776277                                           | 9635                  | 1461   |
| 1120 – 1500                                | 11830                                                         | 1001                                        | 12831                                 | 1201                                                  | 14813337                                          | 11545                 | 1668   |
| 1500 – 1925                                | 15275                                                         | 597                                         | 15872                                 | 694                                                   | 6109384                                           | 3849                  | 536    |
| 1925 +                                     | 21976                                                         | 914                                         | 22890                                 | 902                                                   | 15565123                                          | 6800                  | 935    |
| all classes                                | 8851                                                          | 516                                         | 9367                                  | 745                                                   | 72131458                                          | 77005                 | 10857  |
| estd. total exp. (000) for hospitalisation | 68157709                                                      | 3973749                                     | 72131458                              | 5740611                                               | X                                                 | X                     | X      |

Table (31): Average expenditure (Rs.) per hospitalisation case on account of hospitalisation for each mpce class and sex

| All-India<br>mpce class                            | Males                                                                |                                                   |                                             | loss of<br>household<br>income (Rs.)<br>due to hospi-<br>talisation | estd.<br>total<br>expen-<br>diture<br>(000) for<br>hospi-<br>talisation | Rural + Urban            |             |
|----------------------------------------------------|----------------------------------------------------------------------|---------------------------------------------------|---------------------------------------------|---------------------------------------------------------------------|-------------------------------------------------------------------------|--------------------------|-------------|
|                                                    | average total expenditure (Rs.) on account of<br>hospitalisation     |                                                   |                                             |                                                                     |                                                                         | hospitalisation<br>cases |             |
|                                                    | medical<br>expenditure<br>on treatment<br>during stay at<br>hospital | other expenses<br>incurred for<br>hospitalisation | total<br>expenditure for<br>hospitalisation |                                                                     |                                                                         | estd. no.<br>(00)        | sam-<br>ple |
| (1)                                                | (2)                                                                  | (3)                                               | (4)                                         | (5)                                                                 | (6)                                                                     | (7)                      | (8)         |
| 0 – 235                                            | 4076                                                                 | 320                                               | 4396                                        | 532                                                                 | 1820540                                                                 | 4141                     | 563         |
| 235 – 265                                          | 3596                                                                 | 382                                               | 3978                                        | 666                                                                 | 1112274                                                                 | 2796                     | 404         |
| 265 – 320                                          | 3771                                                                 | 373                                               | 4145                                        | 819                                                                 | 3204289                                                                 | 7731                     | 1054        |
| 320 – 365                                          | 5151                                                                 | 440                                               | 5591                                        | 783                                                                 | 5814314                                                                 | 10400                    | 1316        |
| 365 – 410                                          | 4206                                                                 | 478                                               | 4684                                        | 693                                                                 | 4165432                                                                 | 8893                     | 1100        |
| 410 – 460                                          | 4662                                                                 | 452                                               | 5115                                        | 676                                                                 | 6735750                                                                 | 13169                    | 1467        |
| 460 – 520                                          | 6825                                                                 | 488                                               | 7313                                        | 820                                                                 | 9881033                                                                 | 13512                    | 1703        |
| 520 – 605                                          | 5778                                                                 | 451                                               | 6229                                        | 767                                                                 | 8954314                                                                 | 14375                    | 1787        |
| 605 – 730                                          | 6846                                                                 | 493                                               | 7339                                        | 848                                                                 | 12252984                                                                | 16695                    | 2009        |
| 730 – 980                                          | 8491                                                                 | 713                                               | 9204                                        | 1199                                                                | 19229166                                                                | 20891                    | 2327        |
| 980 – 1285                                         | 11148                                                                | 779                                               | 11927                                       | 838                                                                 | 10376297                                                                | 8700                     | 959         |
| 1285 +                                             | 12375                                                                | 793                                               | 13168                                       | 935                                                                 | 18934697                                                                | 14379                    | 1413        |
| all classes                                        | 7004                                                                 | 549                                               | 7553                                        | 852                                                                 | 102481089                                                               | 135684                   | 16102       |
| estd. total exp.<br>(000) for hospita-<br>lisation | 95036908                                                             | 7444181                                           | 102481089                                   | 11565696                                                            | X                                                                       | X                        | X           |

Table (31): Average expenditure (Rs.) per hospitalisation case on account of hospitalisation for each mpce class and sex

| All-India<br>mpce class                            | Females                                                              |                                                   |                                             | loss of<br>household<br>income (Rs.)<br>due to hospi-<br>talisation | estd.<br>total<br>expen-<br>diture<br>(000) for<br>hospi-<br>talisation | Rural + Urban            |             |
|----------------------------------------------------|----------------------------------------------------------------------|---------------------------------------------------|---------------------------------------------|---------------------------------------------------------------------|-------------------------------------------------------------------------|--------------------------|-------------|
|                                                    | average total expenditure (Rs.) on account of<br>hospitalisation     |                                                   |                                             |                                                                     |                                                                         | hospitalisation<br>cases |             |
|                                                    | medical<br>expenditure<br>on treatment<br>during stay at<br>hospital | other expenses<br>incurred for<br>hospitalisation | total<br>expenditure for<br>hospitalisation |                                                                     |                                                                         | estd. no.<br>(00)        | sam-<br>ple |
| (1)                                                | (2)                                                                  | (3)                                               | (4)                                         | (5)                                                                 | (6)                                                                     | (7)                      | (8)         |
| 0 – 235                                            | 3944                                                                 | 374                                               | 4318                                        | 471                                                                 | 1450455                                                                 | 3359                     | 426         |
| 235 – 265                                          | 3499                                                                 | 450                                               | 3949                                        | 289                                                                 | 1277745                                                                 | 3235                     | 353         |
| 265 – 320                                          | 3512                                                                 | 285                                               | 3797                                        | 364                                                                 | 2522647                                                                 | 6645                     | 891         |
| 320 – 365                                          | 4282                                                                 | 359                                               | 4641                                        | 389                                                                 | 3995138                                                                 | 8609                     | 1129        |
| 365 – 410                                          | 3765                                                                 | 417                                               | 4181                                        | 371                                                                 | 3302449                                                                 | 7898                     | 962         |
| 410 – 460                                          | 4255                                                                 | 372                                               | 4627                                        | 361                                                                 | 5198861                                                                 | 11236                    | 1314        |
| 460 – 520                                          | 4730                                                                 | 376                                               | 5106                                        | 506                                                                 | 6128191                                                                 | 12002                    | 1464        |
| 520 – 605                                          | 5495                                                                 | 454                                               | 5949                                        | 540                                                                 | 8370093                                                                 | 14069                    | 1704        |
| 605 – 730                                          | 6064                                                                 | 502                                               | 6566                                        | 480                                                                 | 9653973                                                                 | 14703                    | 1791        |
| 730 – 980                                          | 7296                                                                 | 783                                               | 8079                                        | 455                                                                 | 13847573                                                                | 17140                    | 1982        |
| 980 – 1285                                         | 8072                                                                 | 510                                               | 8583                                        | 565                                                                 | 7392722                                                                 | 8614                     | 954         |
| 1285 +                                             | 13190                                                                | 696                                               | 13886                                       | 537                                                                 | 18055371                                                                | 13003                    | 1307        |
| all classes                                        | 6237                                                                 | 501                                               | 6737                                        | 462                                                                 | 81195217                                                                | 120513                   | 14277       |
| estd. total exp.<br>(000) for hospita-<br>lisation | 75162217                                                             | 6033000                                           | 81195217                                    | 5563087                                                             | X                                                                       | X                        | X           |

## Appendix A

Table (31): Average expenditure (Rs.) per hospitalisation case on account of hospitalisation for each mpce class and sex

| All-India<br>mpce class                            | Persons                                                              |                                                   |                                             | loss of<br>household<br>income (Rs.)<br>due to hospi-<br>talisation | estd.<br>total<br>expen-<br>diture<br>(000) for<br>hospi-<br>talisation | Rural + Urban            |             |
|----------------------------------------------------|----------------------------------------------------------------------|---------------------------------------------------|---------------------------------------------|---------------------------------------------------------------------|-------------------------------------------------------------------------|--------------------------|-------------|
|                                                    | average total expenditure (Rs.) on account of<br>hospitalisation     |                                                   |                                             |                                                                     |                                                                         | hospitalisation<br>cases |             |
|                                                    | medical<br>expenditure<br>on treatment<br>during stay at<br>hospital | other expenses<br>incurred for<br>hospitalisation | total<br>expenditure for<br>hospitalisation |                                                                     |                                                                         | estd. no.<br>(00)        | sam-<br>ple |
| (1)                                                | (2)                                                                  | (3)                                               | (4)                                         | (5)                                                                 | (6)                                                                     | (7)                      | (8)         |
| 0 – 235                                            | 4017                                                                 | 344                                               | 4361                                        | 504                                                                 | 3270995                                                                 | 7501                     | 989         |
| 235 – 265                                          | 3544                                                                 | 419                                               | 3963                                        | 464                                                                 | 2390019                                                                 | 6031                     | 757         |
| 265 – 320                                          | 3651                                                                 | 332                                               | 3984                                        | 609                                                                 | 5726936                                                                 | 14376                    | 1945        |
| 320 – 365                                          | 4757                                                                 | 403                                               | 5161                                        | 605                                                                 | 9809452                                                                 | 19009                    | 2445        |
| 365 – 410                                          | 3999                                                                 | 449                                               | 4448                                        | 542                                                                 | 7467880                                                                 | 16791                    | 2062        |
| 410 – 460                                          | 4475                                                                 | 415                                               | 4890                                        | 531                                                                 | 11934611                                                                | 24405                    | 2781        |
| 460 – 520                                          | 5839                                                                 | 435                                               | 6275                                        | 672                                                                 | 16009224                                                                | 25515                    | 3167        |
| 520 – 605                                          | 5638                                                                 | 453                                               | 6091                                        | 654                                                                 | 17324407                                                                | 28445                    | 3491        |
| 605 – 730                                          | 6480                                                                 | 497                                               | 6977                                        | 676                                                                 | 21906956                                                                | 31397                    | 3800        |
| 730 – 980                                          | 7952                                                                 | 745                                               | 8697                                        | 864                                                                 | 33076739                                                                | 38031                    | 4309        |
| 980 – 1285                                         | 9618                                                                 | 645                                               | 10263                                       | 702                                                                 | 17769020                                                                | 17313                    | 1913        |
| 1285 +                                             | 12762                                                                | 747                                               | 13509                                       | 746                                                                 | 36990068                                                                | 27382                    | 2720        |
| all classes                                        | 6643                                                                 | 526                                               | 7169                                        | 669                                                                 | 183676306                                                               | 256196                   | 30379       |
| estd. total exp.<br>(000) for hospita-<br>lisation | 170199125                                                            | 13477181                                          | 183676306                                   | 17128783                                                            | X                                                                       | X                        | X           |

Table (32): Average total expenditure on account of hospitalisation per household and per 1000 distribution of total household expenditure on account of hospitalisation by source of finance for each mpce class

| All-India                               |                                                              |                                                                  |            |                                         |                                                                                          |           | Rural                                   |                                                            |             |
|-----------------------------------------|--------------------------------------------------------------|------------------------------------------------------------------|------------|-----------------------------------------|------------------------------------------------------------------------------------------|-----------|-----------------------------------------|------------------------------------------------------------|-------------|
| mpce class                              | average total expenditure on account of hosp. per hhs. (Rs.) | distribution of expenses of hospitalisation by source of finance |            |                                         |                                                                                          |           | estd. total expenditure for hosp. (000) | households with hospitalisation cases during last 365 days |             |
|                                         |                                                              | household income/savings                                         | borrowings | contribution from friends and relatives | other sources (incl. sale of ornaments and other physical assets, draught animals, etc.) | total     |                                         | estd no. of hhs.(00)                                       | sample hhs. |
| (1)                                     | (2)                                                          | (3)                                                              | (4)        | (5)                                     | (6)                                                                                      | (7)       | (8)                                     | (9)                                                        | (10)        |
| 0 – 225                                 | 3975                                                         | 332                                                              | 435        | 152                                     | 81                                                                                       | 1000      | 2173973                                 | 5028                                                       | 655         |
| 225 – 255                               | 4433                                                         | 265                                                              | 556        | 109                                     | 69                                                                                       | 1000      | 2028763                                 | 4267                                                       | 512         |
| 255 – 300                               | 4030                                                         | 314                                                              | 488        | 131                                     | 67                                                                                       | 1000      | 4105367                                 | 9058                                                       | 1248        |
| 300 – 340                               | 4808                                                         | 349                                                              | 462        | 142                                     | 47                                                                                       | 1000      | 5393081                                 | 9697                                                       | 1250        |
| 340 – 380                               | 4430                                                         | 379                                                              | 461        | 121                                     | 40                                                                                       | 1000      | 5687887                                 | 11099                                                      | 1344        |
| 380 – 420                               | 4930                                                         | 347                                                              | 402        | 154                                     | 97                                                                                       | 1000      | 8227179                                 | 13235                                                      | 1605        |
| 420 – 470                               | 5121                                                         | 391                                                              | 451        | 104                                     | 54                                                                                       | 1000      | 8322096                                 | 13929                                                      | 1733        |
| 470 – 525                               | 5657                                                         | 399                                                              | 435        | 102                                     | 64                                                                                       | 1000      | 11127840                                | 16502                                                      | 1988        |
| 525 – 615                               | 6034                                                         | 420                                                              | 411        | 119                                     | 50                                                                                       | 1000      | 13130679                                | 17455                                                      | 2110        |
| 615 – 775                               | 6895                                                         | 418                                                              | 406        | 132                                     | 44                                                                                       | 1000      | 18263402                                | 21154                                                      | 2344        |
| 775 – 950                               | 8660                                                         | 419                                                              | 411        | 106                                     | 64                                                                                       | 1000      | 11659636                                | 11120                                                      | 1228        |
| 950 +                                   | 10410                                                        | 485                                                              | 331        | 143                                     | 41                                                                                       | 1000      | 21424945                                | 15660                                                      | 1486        |
| all                                     | 6225                                                         | 409                                                              | 411        | 126                                     | 55                                                                                       | 1000      | 111544848                               | 148206                                                     | 17503       |
| estd. expn. (000)                       | X                                                            | 47268294                                                         | 47485229   | 14579049                                | 6324977                                                                                  | 115657549 | X                                       | X                                                          | X           |
| estd. no. of hhs. with hosp. cases (00) | X                                                            | 125176                                                           | 70846      | 28964                                   | 10196                                                                                    | 148206    | X                                       | X                                                          | X           |
| sample hhs. with hosp. cases            | X                                                            | 15197                                                            | 7934       | 3423                                    | 1279                                                                                     | 17503     | X                                       | X                                                          | X           |



Table (32): Average total expenditure on account of hospitalisation per household and per 1000 distribution of total household expenditure on account of hospitalisation by source of finance for each mpce class

| All-India                               |                                                              |                                                                  |            |                                         |                                                                                          |          | Urban                                   |                                                            |             |
|-----------------------------------------|--------------------------------------------------------------|------------------------------------------------------------------|------------|-----------------------------------------|------------------------------------------------------------------------------------------|----------|-----------------------------------------|------------------------------------------------------------|-------------|
| mpce class                              | average total expenditure on account of hosp. per hhs. (Rs.) | distribution of expenses of hospitalisation by source of finance |            |                                         |                                                                                          |          | estd. total expenditure for hosp. (000) | households with hospitalisation cases during last 365 days |             |
|                                         |                                                              | household income/savings                                         | borrowings | contribution from friends and relatives | other sources (incl. sale of ornaments and other physical assets, draught animals, etc.) | total    |                                         | estd no. of hhs.(00)                                       | sample hhs. |
| (1)                                     | (2)                                                          | (3)                                                              | (4)        | (5)                                     | (6)                                                                                      | (7)      | (8)                                     | (9)                                                        | (10)        |
| 0 – 300                                 | 5398                                                         | 541                                                              | 308        | 123                                     | 28                                                                                       | 1000     | 1097022                                 | 1628                                                       | 246         |
| 300 – 350                               | 2483                                                         | 338                                                              | 401        | 193                                     | 69                                                                                       | 1000     | 361256                                  | 1277                                                       | 181         |
| 350 – 425                               | 3872                                                         | 322                                                              | 334        | 171                                     | 172                                                                                      | 1000     | 1621569                                 | 3537                                                       | 532         |
| 425 – 500                               | 5667                                                         | 345                                                              | 486        | 110                                     | 59                                                                                       | 1000     | 4416370                                 | 6867                                                       | 992         |
| 500 – 575                               | 4504                                                         | 472                                                              | 359        | 148                                     | 21                                                                                       | 1000     | 1779993                                 | 3234                                                       | 480         |
| 575 – 665                               | 4803                                                         | 419                                                              | 407        | 106                                     | 68                                                                                       | 1000     | 3707432                                 | 6004                                                       | 867         |
| 665 – 775                               | 8299                                                         | 573                                                              | 295        | 108                                     | 24                                                                                       | 1000     | 7687128                                 | 7961                                                       | 1168        |
| 775 – 915                               | 7062                                                         | 526                                                              | 283        | 124                                     | 67                                                                                       | 1000     | 6196566                                 | 7735                                                       | 1192        |
| 915 – 1120                              | 9109                                                         | 625                                                              | 191        | 142                                     | 42                                                                                       | 1000     | 8776277                                 | 9165                                                       | 1415        |
| 1120 – 1500                             | 12831                                                        | 585                                                              | 203        | 78                                      | 134                                                                                      | 1000     | 14813337                                | 10920                                                      | 1632        |
| 1500 – 1925                             | 15872                                                        | 707                                                              | 116        | 159                                     | 18                                                                                       | 1000     | 6109384                                 | 3603                                                       | 502         |
| 1925 +                                  | 22890                                                        | 665                                                              | 107        | 119                                     | 110                                                                                      | 1000     | 15565123                                | 6232                                                       | 907         |
| all                                     | 9367                                                         | 578                                                              | 227        | 117                                     | 78                                                                                       | 1000     | 72131458                                | 68163                                                      | 10114       |
| estd. expn. (000)                       | X                                                            | 44941929                                                         | 17627649   | 9101180                                 | 6057128                                                                                  | 77727887 | X                                       | X                                                          | X           |
| estd. no. of hhs. with hosp. cases (00) | X                                                            | 60627                                                            | 20126      | 10584                                   | 2518                                                                                     | 68163    | X                                       | X                                                          | X           |
| sample hhs. with hosp. cases            | X                                                            | 9148                                                             | 2782       | 1582                                    | 377                                                                                      | 10114    | X                                       | X                                                          | X           |



Table (32): Average total expenditure on account of hospitalisation per household and per 1000 distribution of total household expenditure on account of hospitalisation by source of finance for each mpce class

| All-India                               |                                                              |                                                                  |            |                                         |                                                                                          |           | Rural + Urban                           |                                                            |             |
|-----------------------------------------|--------------------------------------------------------------|------------------------------------------------------------------|------------|-----------------------------------------|------------------------------------------------------------------------------------------|-----------|-----------------------------------------|------------------------------------------------------------|-------------|
| mpce class                              | average total expenditure on account of hosp. per hhs. (Rs.) | distribution of expenses of hospitalisation by source of finance |            |                                         |                                                                                          |           | estd. total expenditure for hosp. (000) | households with hospitalisation cases during last 365 days |             |
|                                         |                                                              | household income/savings                                         | borrowings | contribution from friends and relatives | other sources (incl. sale of ornaments and other physical assets, draught animals, etc.) | total     |                                         | estd no. of hhs.(00)                                       | sample hhs. |
| (1)                                     | (2)                                                          | (3)                                                              | (4)        | (5)                                     | (6)                                                                                      | (7)       | (8)                                     | (9)                                                        | (10)        |
| 0 – 235                                 | 4361                                                         | 400                                                              | 394        | 142                                     | 64                                                                                       | 1000      | 3270995                                 | 6656                                                       | 901         |
| 235 – 265                               | 3963                                                         | 277                                                              | 532        | 122                                     | 69                                                                                       | 1000      | 2390019                                 | 5544                                                       | 693         |
| 265 – 320                               | 3984                                                         | 316                                                              | 445        | 142                                     | 97                                                                                       | 1000      | 5726936                                 | 12595                                                      | 1780        |
| 320 – 365                               | 5161                                                         | 347                                                              | 473        | 127                                     | 52                                                                                       | 1000      | 9809452                                 | 16564                                                      | 2242        |
| 365 – 410                               | 4448                                                         | 400                                                              | 437        | 127                                     | 35                                                                                       | 1000      | 7467880                                 | 14334                                                      | 1824        |
| 410 – 460                               | 4890                                                         | 370                                                              | 404        | 138                                     | 88                                                                                       | 1000      | 11934611                                | 19239                                                      | 2472        |
| 460 – 520                               | 6275                                                         | 479                                                              | 375        | 106                                     | 40                                                                                       | 1000      | 16009224                                | 21889                                                      | 2901        |
| 520 – 605                               | 6091                                                         | 446                                                              | 378        | 110                                     | 65                                                                                       | 1000      | 17324407                                | 24237                                                      | 3180        |
| 605 – 730                               | 6977                                                         | 509                                                              | 316        | 129                                     | 46                                                                                       | 1000      | 21906956                                | 26620                                                      | 3525        |
| 730 – 980                               | 8697                                                         | 495                                                              | 313        | 107                                     | 85                                                                                       | 1000      | 33076739                                | 32074                                                      | 3976        |
| 980 – 1285                              | 10263                                                        | 518                                                              | 310        | 124                                     | 48                                                                                       | 1000      | 17769020                                | 14723                                                      | 1730        |
| 1285 +                                  | 13509                                                        | 562                                                              | 235        | 133                                     | 70                                                                                       | 1000      | 36990068                                | 21892                                                      | 2393        |
| all                                     | 7169                                                         | 477                                                              | 337        | 122                                     | 64                                                                                       | 1000      | 183676306                               | 216369                                                     | 27617       |
| estd. expn. (000)                       | X                                                            | 92210223                                                         | 65112879   | 23680229                                | 12382106                                                                                 | 193385436 | X                                       | X                                                          | X           |
| estd. no. of hhs. with hosp. cases (00) | X                                                            | 185803                                                           | 90972      | 39548                                   | 12714                                                                                    | 216369    | X                                       | X                                                          | X           |
| sample hhs. with hosp. cases            | X                                                            | 24345                                                            | 10716      | 5005                                    | 1656                                                                                     | 27617     | X                                       | X                                                          | X           |

Table (33): Average medical expenditure (Rs.) for treatment under different heads of treatment during stay at hospitals as inpatient during last 365 days per hospitalisation case receiving medical treatment for each type of hospital, mpce class of household

| mpce class  | average medical expenditure (Rs.) for treatment under different heads for treatment during stay at hospitals |                    |                   |               |                       |                 |                  |                 |                |                                   |           |       | estd. expn. (000) | hosp. cases receiving med. treatment on payment (00) |        |                       |
|-------------|--------------------------------------------------------------------------------------------------------------|--------------------|-------------------|---------------|-----------------------|-----------------|------------------|-----------------|----------------|-----------------------------------|-----------|-------|-------------------|------------------------------------------------------|--------|-----------------------|
|             | services                                                                                                     |                    |                   |               |                       |                 | goods            |                 |                |                                   |           | total |                   | estd. (00)                                           | sample |                       |
|             | doctor's/ surgeons fee                                                                                       |                    | diag- nostic test | bed char- ges | atten- dant char- ges | physio- therapy | other servi- ces | medicines       |                | perso- nal medi- cal applia- nces | food etc. |       |                   |                                                      |        | blood, oxy- gen, etc. |
|             | hospital staff                                                                                               | other specia- list |                   |               |                       |                 |                  | from hos- pital | from out- side |                                   |           |       |                   |                                                      |        |                       |
| (1)         | (2)                                                                                                          | (3)                | (4)               | (5)           | (6)                   | (7)             | (8)              | (9)             | (10)           | (11)                              | (12)      | (13)  | (14)              | (15)                                                 | (16)   | (17)                  |
| 10 – 225    | 20                                                                                                           | 2                  | 29                | 4             | 10                    | 0               | 2                | 16              | 713            | 10                                | 110       | 97    | 1013              | 107373                                               | 1060   | 129                   |
| 225 – 255   | 15                                                                                                           | 14                 | 94                | 8             | 3                     | 0               | 12               | 26              | 959            | 3                                 | 96        | 40    | 1269              | 133875                                               | 1055   | 111                   |
| 255 – 300   | 19                                                                                                           | 13                 | 79                | 6             | 3                     | 0               | 15               | 20              | 881            | 7                                 | 109       | 48    | 1200              | 253536                                               | 2113   | 258                   |
| 300 – 340   | 7                                                                                                            | 25                 | 79                | 2             | 1                     | 0               | 10               | 30              | 837            | 2                                 | 146       | 16    | 1156              | 262785                                               | 2274   | 247                   |
| 340 – 380   | 39                                                                                                           | 15                 | 210               | 14            | 4                     | 0               | 20               | 51              | 1012           | 7                                 | 185       | 10    | 1567              | 299683                                               | 1912   | 262                   |
| 380 – 420   | 27                                                                                                           | 13                 | 94                | 15            | 8                     | 1               | 12               | 32              | 784            | 10                                | 153       | 29    | 1177              | 365652                                               | 3106   | 321                   |
| 420 – 470   | 25                                                                                                           | 47                 | 231               | 59            | 10                    | 0               | 15               | 37              | 1027           | 9                                 | 123       | 19    | 1601              | 378700                                               | 2365   | 286                   |
| 470 – 525   | 30                                                                                                           | 50                 | 250               | 37            | 17                    | 1               | 21               | 54              | 1003           | 27                                | 143       | 62    | 1695              | 533669                                               | 3148   | 384                   |
| 525 – 615   | 7                                                                                                            | 30                 | 171               | 30            | 21                    | 6               | 29               | 29              | 775            | 58                                | 136       | 8     | 1300              | 460969                                               | 3546   | 391                   |
| 615 – 775   | 85                                                                                                           | 16                 | 160               | 24            | 15                    | 0               | 10               | 53              | 831            | 22                                | 117       | 39    | 1372              | 429620                                               | 3131   | 387                   |
| 775 – 950   | 61                                                                                                           | 61                 | 386               | 48            | 52                    | 14              | 79               | 71              | 1436           | 13                                | 146       | 66    | 2434              | 420046                                               | 1726   | 194                   |
| 950 +       | 94                                                                                                           | 10                 | 279               | 80            | 7                     | 2               | 32               | 62              | 1230           | 5                                 | 151       | 67    | 2019              | 309494                                               | 1533   | 178                   |
| all classes | 35                                                                                                           | 26                 | 175               | 28            | 13                    | 2               | 21               | 41              | 935            | 18                                | 137       | 37    | 1467              | 3955401                                              | 26969  | 3148                  |

1  
2  
3  
4  
5  
6  
7  
8  
9  
10  
11  
12  
13  
14  
15  
16  
17  
18  
19  
20  
21  
22  
23  
24  
25  
26  
27  
28  
29  
30  
31  
32  
33  
34  
35  
36  
37  
38  
39  
40  
41  
42  
43  
44  
45  
46  
47

Table (33): Average medical expenditure (Rs.) for treatment under different heads of treatment during stay at hospitals as inpatient during last 365 days per hospitalisation case receiving medical treatment for each type of hospital, mpce class of household

All-India Rural type of hospital: public dispensary

| mpce class  | average medical expenditure (Rs.) for treatment under different heads for treatment during stay at hospitals |                    |                   |               |                       |                 |                  |                 |                |                                   |           |       | estd. expn. (000) | hosp. cases receiving med. treatment on payment (00) |        |                       |
|-------------|--------------------------------------------------------------------------------------------------------------|--------------------|-------------------|---------------|-----------------------|-----------------|------------------|-----------------|----------------|-----------------------------------|-----------|-------|-------------------|------------------------------------------------------|--------|-----------------------|
|             | services                                                                                                     |                    |                   |               |                       |                 | goods            |                 |                |                                   |           | total |                   | estd. (00)                                           | sample |                       |
|             | doctor's/ surgeons fee                                                                                       |                    | diag- nostic test | bed char- ges | atten- dant char- ges | physio- therapy | other servi- ces | medicines       |                | perso- nal medi- cal applia- nces | food etc. |       |                   |                                                      |        | blood, oxy- gen, etc. |
|             | hospital staff                                                                                               | other specia- list |                   |               |                       |                 |                  | from hos- pital | from out- side |                                   |           |       |                   |                                                      |        |                       |
| (1)         | (2)                                                                                                          | (3)                | (4)               | (5)           | (6)                   | (7)             | (8)              | (9)             | (10)           | (11)                              | (12)      | (13)  | (14)              | (15)                                                 | (16)   | (17)                  |
| 10 – 225    | 0                                                                                                            | 0                  | 0                 | 0             | 0                     | 0               | 0                | 0               | 228            | 0                                 | 299       | 0     | 527               | 638                                                  | 12     | 2                     |
| 225 – 255   | 12                                                                                                           | 80                 | 90                | 0             | 0                     | 0               | 9                | 0               | 307            | 0                                 | 179       | 0     | 677               | 2119                                                 | 31     | 7                     |
| 255 – 300   | 0                                                                                                            | 0                  | 2                 | 0             | 0                     | 0               | 0                | 0               | 142            | 0                                 | 70        | 0     | 213               | 1811                                                 | 85     | 8                     |
| 300 – 340   | 46                                                                                                           | 493                | 56                | 0             | 0                     | 0               | 0                | 26              | 4616           | 0                                 | 253       | 77    | 5566              | 13254                                                | 24     | 6                     |
| 340 – 380   | 153                                                                                                          | 0                  | 152               | 61            | 0                     | 0               | 0                | 152             | 81             | 0                                 | 110       | 0     | 708               | 5100                                                 | 72     | 4                     |
| 380 – 420   | 0                                                                                                            | 0                  | 53                | 7             | 8                     | 0               | 0                | 3               | 1301           | 0                                 | 223       | 21    | 1616              | 13939                                                | 86     | 13                    |
| 420 – 470   | 243                                                                                                          | 0                  | 192               | 73            | 0                     | 0               | 0                | 0               | 810            | 0                                 | 83        | 27    | 1427              | 20023                                                | 140    | 11                    |
| 470 – 525   | 0                                                                                                            | 20                 | 122               | 20            | 0                     | 0               | 0                | 0               | 376            | 8                                 | 53        | 0     | 599               | 7234                                                 | 121    | 10                    |
| 525 – 615   | 278                                                                                                          | 75                 | 794               | 248           | 0                     | 0               | 0                | 259             | 1372           | 31                                | 637       | 58    | 3753              | 28384                                                | 76     | 14                    |
| 615 – 775   | 0                                                                                                            | 73                 | 138               | 0             | 0                     | 0               | 2                | 122             | 1186           | 0                                 | 97        | 0     | 1618              | 11149                                                | 69     | 8                     |
| 775 – 950   | 1042                                                                                                         | 18                 | 301               | 473           | 28                    | 252             | 340              | 982             | 3640           | 12                                | 194       | 27    | 7310              | 67575                                                | 92     | 13                    |
| 950 +       | 2                                                                                                            | 343                | 51                | 51            | 0                     | 0               | 0                | 103             | 690            | 0                                 | 343       | 0     | 1583              | 6310                                                 | 40     | 3                     |
| all classes | 193                                                                                                          | 50                 | 190               | 97            | 4                     | 27              | 38               | 159             | 1132           | 5                                 | 180       | 17    | 2092              | 177538                                               | 848    | 99                    |

Table (33): Average medical expenditure (Rs.) for treatment under different heads of treatment during stay at hospitals as inpatient during last 365 days per hospitalisation case receiving medical treatment for each type of hospital, mpce class of household

All-India Rural type of hospital: public hospital + public dispensary

| mpce class  | average medical expenditure (Rs.) for treatment under different heads for treatment during stay at hospitals |                    |                   |               |                       |                 |                  |                 |                |                                   |           |       | estd. expn. (000) | hosp. cases receiving med. treatment on payment (00) |        |                       |
|-------------|--------------------------------------------------------------------------------------------------------------|--------------------|-------------------|---------------|-----------------------|-----------------|------------------|-----------------|----------------|-----------------------------------|-----------|-------|-------------------|------------------------------------------------------|--------|-----------------------|
|             | services                                                                                                     |                    |                   |               |                       |                 | goods            |                 |                |                                   |           | total |                   | estd. (00)                                           | sample |                       |
|             | doctor's/ surgeons fee                                                                                       |                    | diag- nostic test | bed char- ges | atten- dant char- ges | physio- therapy | other servi- ces | medicines       |                | perso- nal medi- cal applia- nces | food etc. |       |                   |                                                      |        | blood, oxy- gen, etc. |
|             | hospital staff                                                                                               | other specia- list |                   |               |                       |                 |                  | from hos- pital | from out- side |                                   |           |       |                   |                                                      |        |                       |
| (1)         | (2)                                                                                                          | (3)                | (4)               | (5)           | (6)                   | (7)             | (8)              | (9)             | (10)           | (11)                              | (12)      | (13)  | (14)              | (15)                                                 | (16)   | (17)                  |
| 10 – 225    | 20                                                                                                           | 2                  | 29                | 3             | 10                    | 0               | 2                | 16              | 708            | 10                                | 112       | 96    | 1008              | 108011                                               | 1072   | 131                   |
| 225 – 255   | 14                                                                                                           | 16                 | 94                | 8             | 2                     | 0               | 12               | 26              | 940            | 3                                 | 98        | 39    | 1252              | 135995                                               | 1087   | 118                   |
| 255 – 300   | 18                                                                                                           | 12                 | 76                | 5             | 3                     | 0               | 14               | 19              | 853            | 6                                 | 108       | 47    | 1162              | 255347                                               | 2198   | 266                   |
| 300 – 340   | 8                                                                                                            | 30                 | 79                | 2             | 1                     | 0               | 10               | 30              | 876            | 2                                 | 148       | 17    | 1201              | 276039                                               | 2298   | 253                   |
| 340 – 380   | 43                                                                                                           | 14                 | 208               | 16            | 4                     | 0               | 19               | 55              | 978            | 7                                 | 182       | 10    | 1536              | 304783                                               | 1984   | 266                   |
| 380 – 420   | 26                                                                                                           | 13                 | 93                | 15            | 8                     | 1               | 11               | 31              | 798            | 9                                 | 154       | 29    | 1189              | 379591                                               | 3192   | 334                   |
| 420 – 470   | 37                                                                                                           | 44                 | 229               | 60            | 9                     | 0               | 14               | 35              | 1015           | 8                                 | 121       | 19    | 1592              | 398722                                               | 2505   | 297                   |
| 470 – 525   | 29                                                                                                           | 49                 | 245               | 36            | 17                    | 1               | 20               | 52              | 980            | 26                                | 140       | 59    | 1655              | 540903                                               | 3269   | 394                   |
| 525 – 615   | 13                                                                                                           | 30                 | 184               | 35            | 21                    | 6               | 28               | 34              | 788            | 57                                | 146       | 9     | 1351              | 489352                                               | 3622   | 405                   |
| 615 – 775   | 83                                                                                                           | 17                 | 160               | 23            | 15                    | 0               | 10               | 54              | 838            | 22                                | 117       | 38    | 1378              | 440769                                               | 3200   | 395                   |
| 775 – 950   | 110                                                                                                          | 59                 | 382               | 70            | 50                    | 26              | 92               | 118             | 1548           | 13                                | 149       | 64    | 2682              | 487622                                               | 1818   | 207                   |
| 950 +       | 92                                                                                                           | 18                 | 273               | 80            | 7                     | 2               | 31               | 64              | 1216           | 5                                 | 156       | 66    | 2008              | 315804                                               | 1572   | 181                   |
| all classes | 40                                                                                                           | 27                 | 175               | 30            | 13                    | 3               | 21               | 44              | 941            | 18                                | 138       | 36    | 1486              | 4132939                                              | 27817  | 3247                  |

1  
2  
3  
4  
5  
6  
7  
8  
9  
10  
11  
12  
13  
14  
15  
16  
17  
18  
19  
20  
21  
22  
23  
24  
25  
26  
27  
28  
29  
30  
31  
32  
33  
34  
35  
36  
37  
38  
39  
40  
41  
42  
43  
44  
45  
46  
47

Table (33): Average medical expenditure (Rs.) for treatment under different heads of treatment during stay at hospitals as inpatient during last 365 days per hospitalisation case receiving medical treatment for each type of hospital, mpce class of household

All-India Rural type of hospital: private hospital

| mpce class  | average medical expenditure (Rs.) for treatment under different heads for treatment during stay at hospitals |                    |                   |               |                       |                 |                  |                 |                |                                   |           |       | estd. expn. (000) | hosp. cases receiving med. treatment on payment (00) |        |                       |      |
|-------------|--------------------------------------------------------------------------------------------------------------|--------------------|-------------------|---------------|-----------------------|-----------------|------------------|-----------------|----------------|-----------------------------------|-----------|-------|-------------------|------------------------------------------------------|--------|-----------------------|------|
|             | services                                                                                                     |                    |                   |               |                       |                 | goods            |                 |                |                                   |           | total |                   | estd. (00)                                           | sample |                       |      |
|             | doctor's/ surgeons fee                                                                                       |                    | diag- nostic test | bed char- ges | atten- dant char- ges | physio- therapy | other servi- ces | medicines       |                | perso- nal medi- cal applia- nces | food etc. |       |                   |                                                      |        | blood, oxy- gen, etc. |      |
|             | hospital staff                                                                                               | other specia- list |                   |               |                       |                 |                  | from hos- pital | from out- side |                                   |           |       |                   |                                                      |        |                       |      |
| (1)         | (2)                                                                                                          | (3)                | (4)               | (5)           | (6)                   | (7)             | (8)              | (9)             | (10)           | (11)                              | (12)      | (13)  | (14)              | (15)                                                 | (16)   | (17)                  |      |
| 10 – 225    | 164                                                                                                          | 153                | 160               | 269           | 4                     | 0               | 0                | 134             | 975            | 25                                | 133       | 17    | 2034              | 92797                                                | 456    | 53                    |      |
| 225 – 255   | 325                                                                                                          | 154                | 311               | 491           | 83                    | 0               | 1                | 31              | 970            | 2                                 | 180       | 20    | 2569              | 167548                                               | 652    | 41                    |      |
| 255 – 300   | 964                                                                                                          | 193                | 354               | 565           | 37                    | 1               | 14               | 517             | 1410           | 24                                | 230       | 18    | 4326              | 458708                                               | 1060   | 131                   |      |
| 300 – 340   | 346                                                                                                          | 264                | 199               | 429           | 23                    | 0               | 10               | 520             | 928            | 3                                 | 148       | 140   | 3010              | 426750                                               | 1418   | 153                   |      |
| 340 – 380   | 524                                                                                                          | 312                | 369               | 424           | 34                    | 19              | 52               | 314             | 1203           | 6                                 | 271       | 20    | 3548              | 556074                                               | 1567   | 162                   |      |
| 380 – 420   | 711                                                                                                          | 366                | 390               | 425           | 50                    | 40              | 36               | 301             | 1267           | 27                                | 256       | 133   | 4001              | 677391                                               | 1693   | 198                   |      |
| 420 – 470   | 831                                                                                                          | 287                | 400               | 515           | 48                    | 29              | 31               | 611             | 1082           | 4                                 | 246       | 78    | 4162              | 978331                                               | 2351   | 250                   |      |
| 470 – 525   | 652                                                                                                          | 389                | 496               | 625           | 95                    | 34              | 43               | 476             | 1491           | 9                                 | 195       | 197   | 4702              | 1409496                                              | 2998   | 293                   |      |
| 525 – 615   | 1109                                                                                                         | 167                | 344               | 670           | 50                    | 1               | 45               | 440             | 1323           | 9                                 | 237       | 34    | 4428              | 1388452                                              | 3135   | 303                   |      |
| 615 – 775   | 1312                                                                                                         | 397                | 524               | 829           | 120                   | 17              | 167              | 711             | 1680           | 127                               | 244       | 147   | 6276              | 2401439                                              | 3827   | 344                   |      |
| 775 – 950   | 1150                                                                                                         | 163                | 511               | 579           | 77                    | 48              | 44               | 261             | 1834           | 33                                | 278       | 121   | 5100              | 967494                                               | 1897   | 171                   |      |
| 950 +       | 1271                                                                                                         | 462                | 697               | 946           | 83                    | 46              | 70               | 632             | 1913           | 46                                | 265       | 94    | 6525              | 2116415                                              | 3244   | 255                   |      |
| all classes | 927                                                                                                          | 311                | 449               | 640           | 70                    | 24              | 60               | 489             | 1448           | 35                                | 235       | 102   | 4791              | 1164089                                              | 4      | 24297                 | 2354 |

Table (33): Average medical expenditure (Rs.) for treatment under different heads of treatment during stay at hospitals as inpatient during last 365 days per hospitalisation case receiving medical treatment for each type of hospital, mpce class of household

| mpce class  | average medical expenditure (Rs.) for treatment under different heads for treatment during stay at hospitals |                    |                   |               |                       |                 |                  |                 |                |                                   |           |       | estd. expn. (000) | hosp. cases receiving med. treatment on payment (00) |        |                       |      |
|-------------|--------------------------------------------------------------------------------------------------------------|--------------------|-------------------|---------------|-----------------------|-----------------|------------------|-----------------|----------------|-----------------------------------|-----------|-------|-------------------|------------------------------------------------------|--------|-----------------------|------|
|             | services                                                                                                     |                    |                   |               |                       |                 | goods            |                 |                |                                   |           | total |                   | estd. (00)                                           | sample |                       |      |
|             | doctor's/ surgeons fee                                                                                       |                    | diag- nostic test | bed char- ges | atten- dant char- ges | physio- therapy | other servi- ces | medicines       |                | perso- nal medi- cal applia- nces | food etc. |       |                   |                                                      |        | blood, oxy- gen, etc. |      |
|             | hospital staff                                                                                               | other specia- list |                   |               |                       |                 |                  | from hos- pital | from out- side |                                   |           |       |                   |                                                      |        |                       |      |
| (1)         | (2)                                                                                                          | (3)                | (4)               | (5)           | (6)                   | (7)             | (8)              | (9)             | (10)           | (11)                              | (12)      | (13)  | (14)              | (15)                                                 | (16)   | (17)                  |      |
| 10 – 225    | 63                                                                                                           | 47                 | 68                | 83            | 8                     | 0               | 1                | 51              | 788            | 14                                | 119       | 72    | 1314              | 200808                                               | 1528   | 184                   |      |
| 225 – 255   | 131                                                                                                          | 68                 | 175               | 189           | 33                    | 0               | 7                | 28              | 951            | 3                                 | 129       | 32    | 1746              | 303542                                               | 1739   | 159                   |      |
| 255 – 300   | 326                                                                                                          | 71                 | 166               | 187           | 14                    | 0               | 14               | 181             | 1034           | 12                                | 148       | 37    | 2191              | 714055                                               | 3258   | 397                   |      |
| 300 – 340   | 137                                                                                                          | 119                | 125               | 165           | 9                     | 0               | 10               | 217             | 896            | 2                                 | 148       | 64    | 1892              | 702789                                               | 3715   | 406                   |      |
| 340 – 380   | 255                                                                                                          | 145                | 278               | 196           | 17                    | 8               | 33               | 169             | 1078           | 7                                 | 221       | 14    | 2424              | 862888                                               | 3560   | 430                   |      |
| 380 – 420   | 263                                                                                                          | 135                | 196               | 157           | 23                    | 14              | 20               | 125             | 961            | 15                                | 190       | 65    | 2165              | 1058612                                              | 4890   | 533                   |      |
| 420 – 470   | 421                                                                                                          | 162                | 312               | 280           | 28                    | 14              | 22               | 314             | 1048           | 6                                 | 181       | 47    | 2836              | 1377592                                              | 4858   | 548                   |      |
| 470 – 525   | 327                                                                                                          | 212                | 365               | 318           | 54                    | 17              | 31               | 255             | 1224           | 18                                | 166       | 125   | 3112              | 1950399                                              | 6267   | 687                   |      |
| 525 – 615   | 521                                                                                                          | 95                 | 258               | 330           | 34                    | 4               | 36               | 222             | 1035           | 35                                | 188       | 21    | 2780              | 1879007                                              | 6760   | 709                   |      |
| 615 – 775   | 753                                                                                                          | 224                | 358               | 462           | 72                    | 9               | 95               | 412             | 1297           | 79                                | 186       | 98    | 4045              | 2842208                                              | 7026   | 739                   |      |
| 775 – 950   | 641                                                                                                          | 112                | 448               | 330           | 64                    | 38              | 68               | 191             | 1694           | 23                                | 215       | 93    | 3917              | 1455116                                              | 3715   | 378                   |      |
| 950 +       | 886                                                                                                          | 317                | 558               | 663           | 58                    | 32              | 57               | 446             | 1685           | 33                                | 229       | 84    | 5050              | 2432218                                              | 4816   | 436                   |      |
| all classes | 454                                                                                                          | 160                | 303               | 314           | 39                    | 13              | 39               | 252             | 1177           | 26                                | 183       | 67    | 3027              | 1577923                                              | 5      | 52133                 | 5606 |

1  
2  
3  
4  
5  
6  
7  
8  
9  
10  
11  
12  
13  
14  
15  
16  
17  
18  
19  
20  
21  
22  
23  
24  
25  
26  
27  
28  
29  
30  
31  
32  
33  
34  
35  
36  
37  
38  
39  
40  
41  
42  
43  
44  
45  
46  
47

Table (33): Average medical expenditure (Rs.) for treatment under different heads of treatment during stay at hospitals as inpatient during last 365 days per hospitalisation case receiving medical treatment for each type of hospital, mpce class of household

All-India Urban type of hospital: public hospital

| mpce class  | average medical expenditure (Rs.) for treatment under different heads for treatment during stay at hospitals |                    |                   |               |                       |                 |                  |                 |                |                                   |           |       | estd. expn. (000) | hosp. cases receiving med. treatment on payment (00) |        |                       |
|-------------|--------------------------------------------------------------------------------------------------------------|--------------------|-------------------|---------------|-----------------------|-----------------|------------------|-----------------|----------------|-----------------------------------|-----------|-------|-------------------|------------------------------------------------------|--------|-----------------------|
|             | services                                                                                                     |                    |                   |               |                       |                 | goods            |                 |                |                                   |           | total |                   | estd. (00)                                           | sample |                       |
|             | doctor's/ surgeons fee                                                                                       |                    | diag- nostic test | bed char- ges | atten- dant char- ges | physio- therapy | other servi- ces | medicines       |                | perso- nal medi- cal applia- nces | food etc. |       |                   |                                                      |        | blood, oxy- gen, etc. |
|             | hospital staff                                                                                               | other specia- list |                   |               |                       |                 |                  | from hos- pital | from out- side |                                   |           |       |                   |                                                      |        |                       |
| (2)         | (3)                                                                                                          | (4)                | (5)               | (6)           | (7)                   | (8)             | (9)              | (10)            | (11)           | (12)                              | (13)      | (14)  | (15)              | (16)                                                 | (17)   |                       |
| 10-300      | 6                                                                                                            | 1                  | 73                | 1             | 1                     | 0               | 1                | 62              | 496            | 3                                 | 79        | 22    | 744               | 25074                                                | 337    | 57                    |
| 300-350     | 76                                                                                                           | 1                  | 148               | 0             | 20                    | 0               | 33               | 38              | 891            | 27                                | 71        | 179   | 1485              | 64742                                                | 436    | 53                    |
| 350-425     | 4                                                                                                            | 0                  | 114               | 4             | 22                    | 0               | 23               | 17              | 450            | 10                                | 68        | 25    | 736               | 63053                                                | 857    | 120                   |
| 425-500     | 25                                                                                                           | 3                  | 167               | 15            | 3                     | 0               | 7                | 33              | 557            | 9                                 | 65        | 17    | 902               | 136710                                               | 1516   | 224                   |
| 500-575     | 6                                                                                                            | 2                  | 179               | 20            | 1                     | 0               | 13               | 14              | 1072           | 2                                 | 109       | 7     | 1426              | 107303                                               | 753    | 102                   |
| 575-665     | 51                                                                                                           | 7                  | 104               | 21            | 2                     | 7               | 29               | 39              | 594            | 14                                | 113       | 51    | 1031              | 113405                                               | 1100   | 184                   |
| 665-775     | 69                                                                                                           | 20                 | 118               | 34            | 5                     | 22              | 11               | 11              | 789            | 47                                | 104       | 40    | 1270              | 169965                                               | 1338   | 216                   |
| 775-915     | 38                                                                                                           | 14                 | 97                | 14            | 13                    | 2               | 25               | 31              | 720            | 4                                 | 138       | 12    | 1107              | 119423                                               | 1079   | 203                   |
| 915-1120    | 47                                                                                                           | 23                 | 412               | 70            | 25                    | 0               | 25               | 105             | 1245           | 17                                | 124       | 34    | 2128              | 201427                                               | 947    | 207                   |
| 1120-1500   | 26                                                                                                           | 74                 | 689               | 76            | 121                   | 1               | 53               | 99              | 1454           | 144                               | 204       | 14    | 2956              | 223058                                               | 755    | 192                   |
| 1500-1925   | 268                                                                                                          | 7                  | 572               | 46            | 86                    | 3               | 82               | 153             | 1531           | 27                                | 116       | 50    | 2940              | 53288                                                | 181    | 49                    |
| 1925+       | 219                                                                                                          | 211                | 348               | 260           | 43                    | 18              | 37               | 155             | 1439           | 104                               | 93        | 112   | 3039              | 84502                                                | 278    | 73                    |
| all classes | 46                                                                                                           | 20                 | 215               | 34            | 21                    | 5               | 23               | 47              | 839            | 29                                | 107       | 36    | 1422              | 1361951                                              | 9577   | 1680                  |

Table (33): Average medical expenditure (Rs.) for treatment under different heads of treatment during stay at hospitals as inpatient during last 365 days per hospitalisation case receiving medical treatment for each type of hospital, mpce class of household

| mpce class  | average medical expenditure (Rs.) for treatment under different heads for treatment during stay at hospitals |                    |                   |               |                       |                 |                  |                 |                |                                   |           |       | estd. expn. (000) | hosp. cases receiving med. treatment on payment (00) |        |                       |
|-------------|--------------------------------------------------------------------------------------------------------------|--------------------|-------------------|---------------|-----------------------|-----------------|------------------|-----------------|----------------|-----------------------------------|-----------|-------|-------------------|------------------------------------------------------|--------|-----------------------|
|             | services                                                                                                     |                    |                   |               |                       |                 | goods            |                 |                |                                   |           | total |                   | estd. (00)                                           | sample |                       |
|             | doctor's/ surgeons fee                                                                                       |                    | diag- nostic test | bed char- ges | atten- dant char- ges | physio- therapy | other servi- ces | medicines       |                | perso- nal medi- cal applia- nces | food etc. |       |                   |                                                      |        | blood, oxy- gen, etc. |
|             | hospital staff                                                                                               | other specia- list |                   |               |                       |                 |                  | from hos- pital | from out- side |                                   |           |       |                   |                                                      |        |                       |
| (2)         | (3)                                                                                                          | (4)                | (5)               | (6)           | (7)                   | (8)             | (9)              | (10)            | (11)           | (12)                              | (13)      | (14)  | (15)              | (16)                                                 | (17)   |                       |
| 10-300      | 15                                                                                                           | 0                  | 3                 | 0             | 28                    | 0               | 23               | 0               | 820            | 0                                 | 71        | 0     | 960               | 2838                                                 | 30     | 3                     |
| 300-350     | 0                                                                                                            | 0                  | 0                 | 0             | 0                     | 0               | 0                | 0               | 10000          | 0                                 | 0         | 0     | 10000             | 3447                                                 | 3      | 1                     |
| 350-425     | 8                                                                                                            | 0                  | 223               | 0             | 0                     | 0               | 0                | 35              | 329            | 0                                 | 121       | 0     | 717               | 1502                                                 | 21     | 3                     |
| 425-500     | 1                                                                                                            | 0                  | 92                | 0             | 0                     | 0               | 0                | 17              | 551            | 0                                 | 144       | 25    | 830               | 5405                                                 | 65     | 7                     |
| 500-575     | 355                                                                                                          | 0                  | 1454              | 199           | 65                    | 0               | 112              | 0               | 2385           | 0                                 | 335       | 0     | 4904              | 19576                                                | 40     | 5                     |
| 575-665     | 30                                                                                                           | 0                  | 12                | 0             | 0                     | 0               | 0                | 0               | 385            | 0                                 | 137       | 0     | 563               | 1431                                                 | 25     | 4                     |
| 665-775     | 0                                                                                                            | 26                 | 10                | 4             | 0                     | 155             | 9                | 0               | 877            | 0                                 | 17        | 0     | 1098              | 2639                                                 | 24     | 5                     |
| 775-915     | 619                                                                                                          | 0                  | 96                | 0             | 0                     | 0               | 24               | 7               | 1252           | 0                                 | 84        | 48    | 2130              | 24941                                                | 117    | 13                    |
| 915-1120    | 81                                                                                                           | 0                  | 167               | 61            | 0                     | 0               | 14               | 0               | 1054           | 0                                 | 107       | 14    | 1498              | 6259                                                 | 42     | 8                     |
| 1120-1500   | 0                                                                                                            | 357                | 355               | 714           | 57                    | 0               | 160              | 0               | 1328           | 67                                | 184       | 0     | 3221              | 14077                                                | 44     | 3                     |
| 1500-1925   | 0                                                                                                            | 0                  | 0                 | 0             | 0                     | 0               | 0                | 0               | 0              | 0                                 | 0         | 0     | 0                 | 0                                                    | 0      | 0                     |
| 1925+       | 7500                                                                                                         | 2000               | 3450              | 2725          | 1350                  | 2850            | 2000             | 0               | 5250           | 1500                              | 5000      | 2375  | 36000             | 24047                                                | 7      | 2                     |
| all classes | 339                                                                                                          | 71                 | 302               | 144           | 36                    | 55              | 70               | 6               | 1224           | 31                                | 208       | 57    | 2541              | 106163                                               | 418    | 54                    |



1  
2  
3  
4  
5  
6  
7

Table (33): Average medical expenditure (Rs.) for treatment under different heads of treatment during stay at hospitals as inpatient during last 365 days per hospitalisation case receiving medical treatment for each type of hospital, mpce class of household

All-India

Urban

type of hospital: public hospital + public dispensary

| mpce class  | average medical expenditure (Rs.) for treatment under different heads for treatment during stay at hospitals |                  |                 |             |                   |               |                |               |              |                             |       |            | estd. expn. (000) | hosp. cases receiving med. treatment on payment (00) |           |                     |
|-------------|--------------------------------------------------------------------------------------------------------------|------------------|-----------------|-------------|-------------------|---------------|----------------|---------------|--------------|-----------------------------|-------|------------|-------------------|------------------------------------------------------|-----------|---------------------|
|             | services                                                                                                     |                  |                 |             |                   |               | goods          |               |              |                             | total | estd. (00) |                   | sample                                               |           |                     |
|             | doctor's/surgeons fee                                                                                        |                  | diagnostic test | bed charges | attendant charges | physiotherapy | other services | medicines     |              | personal medical appliances |       |            |                   |                                                      | food etc. | blood, oxygen, etc. |
|             | hospital staff                                                                                               | other specialist |                 |             |                   |               |                | from hospital | from outside |                             |       |            |                   |                                                      |           |                     |
| (1)         | (2)                                                                                                          | (3)              | (4)             | (5)         | (6)               | (7)           | (8)            | (9)           | (10)         | (11)                        | (12)  | (13)       | (14)              | (15)                                                 | (16)      | (17)                |
| 10-300      | 7                                                                                                            | 1                | 68              | 1           | 3                 | 0             | 3              | 57            | 522          | 2                           | 78    | 20         | 761               | 27912                                                | 367       | 60                  |
| 300-350     | 76                                                                                                           | 1                | 147             | 0           | 20                | 0             | 33             | 38            | 962          | 27                          | 70    | 178        | 1551              | 68189                                                | 440       | 54                  |
| 350-425     | 4                                                                                                            | 0                | 116             | 4           | 21                | 0             | 22             | 18            | 447          | 9                           | 69    | 24         | 735               | 64556                                                | 878       | 123                 |
| 425-500     | 24                                                                                                           | 3                | 164             | 14          | 3                 | 0             | 7              | 32            | 557          | 8                           | 69    | 17         | 899               | 142115                                               | 1581      | 231                 |
| 500-575     | 23                                                                                                           | 1                | 244             | 29          | 5                 | 0             | 18             | 14            | 1138         | 2                           | 120   | 7          | 1601              | 126880                                               | 793       | 107                 |
| 575-665     | 51                                                                                                           | 6                | 102             | 20          | 2                 | 7             | 28             | 38            | 589          | 13                          | 113   | 50         | 1020              | 114836                                               | 1126      | 188                 |
| 665-775     | 68                                                                                                           | 20               | 116             | 34          | 5                 | 24            | 11             | 11            | 790          | 47                          | 103   | 39         | 1267              | 172604                                               | 1362      | 221                 |
| 775-915     | 94                                                                                                           | 13               | 97              | 12          | 12                | 2             | 25             | 28            | 772          | 4                           | 133   | 16         | 1207              | 144364                                               | 1196      | 216                 |
| 915-1120    | 48                                                                                                           | 22               | 402             | 70          | 24                | 0             | 25             | 100           | 1237         | 16                          | 123   | 33         | 2101              | 207686                                               | 988       | 215                 |
| 1120-1500   | 24                                                                                                           | 89               | 670             | 111         | 117               | 1             | 59             | 94            | 1448         | 140                         | 203   | 13         | 2970              | 237135                                               | 798       | 195                 |
| 1500-1925   | 268                                                                                                          | 7                | 572             | 46          | 86                | 3             | 82             | 153           | 1531         | 27                          | 116   | 50         | 2940              | 53288                                                | 181       | 49                  |
| 1925+       | 390                                                                                                          | 253              | 420             | 318         | 74                | 84            | 83             | 151           | 1528         | 137                         | 208   | 165        | 3812              | 108550                                               | 285       | 75                  |
| all classes | 59                                                                                                           | 22               | 219             | 39          | 22                | 7             | 25             | 45            | 855          | 29                          | 111   | 37         | 1469              | 1468114                                              | 9995      | 1734                |

37  
38  
39  
40  
41  
42  
43  
44  
45  
46  
47

Table (33): Average medical expenditure (Rs.) for treatment under different heads of treatment during stay at hospitals as inpatient during last 365 days per hospitalisation case receiving medical treatment for each type of hospital, mpce class of household

All-India Urban type of hospital: private hospital

| mpce class  | average medical expenditure (Rs.) for treatment under different heads for treatment during stay at hospitals |                  |                 |             |                   |               |                |               |              |                             |           |                     |       | estd. expn. (000) | hosp. cases receiving med. treatment on payment (00) |        |
|-------------|--------------------------------------------------------------------------------------------------------------|------------------|-----------------|-------------|-------------------|---------------|----------------|---------------|--------------|-----------------------------|-----------|---------------------|-------|-------------------|------------------------------------------------------|--------|
|             | services                                                                                                     |                  |                 |             |                   |               | goods          |               |              |                             |           |                     | total |                   | estd. (00)                                           | sample |
|             | doctor's/surgeons fee                                                                                        |                  | diagnostic test | bed charges | attendant charges | physiotherapy | other services | medicines     |              | personal medical appliances | food etc. | blood, oxygen, etc. |       |                   |                                                      |        |
|             | hospital staff                                                                                               | other specialist |                 |             |                   |               |                | from hospital | from outside |                             |           |                     |       |                   |                                                      |        |
| (1)         | (2)                                                                                                          | (3)              | (4)             | (5)         | (6)               | (7)           | (8)            | (9)           | (10)         | (11)                        | (12)      | (13)                | (14)  | (15)              | (16)                                                 | (17)   |
| 10-300      | 1086                                                                                                         | 450              | 347             | 420         | 20                | 0             | 0              | 513           | 2646         | 10                          | 157       | 54                  | 5703  | 185815            | 326                                                  | 38     |
| 300-350     | 122                                                                                                          | 363              | 181             | 563         | 79                | 19            | 0              | 253           | 923          | 0                           | 75        | 40                  | 2618  | 25869             | 99                                                   | 21     |
| 350-425     | 521                                                                                                          | 181              | 269             | 314         | 23                | 6             | 2              | 451           | 1052         | 3                           | 149       | 28                  | 3000  | 117664            | 392                                                  | 63     |
| 425-500     | 754                                                                                                          | 599              | 807             | 833         | 22                | 4             | 78             | 630           | 2811         | 143                         | 182       | 208                 | 7070  | 581934            | 823                                                  | 123    |
| 500-575     | 443                                                                                                          | 165              | 261             | 614         | 52                | 18            | 14             | 449           | 415          | 21                          | 108       | 32                  | 2592  | 70193             | 271                                                  | 50     |
| 575-665     | 921                                                                                                          | 61               | 279             | 654         | 14                | 2             | 56             | 449           | 1058         | 506                         | 90        | 56                  | 4148  | 452497            | 1091                                                 | 127    |
| 665-775     | 951                                                                                                          | 338              | 327             | 521         | 56                | 7             | 5              | 479           | 852          | 15                          | 177       | 37                  | 3766  | 444346            | 1180                                                 | 154    |
| 775-915     | 1126                                                                                                         | 361              | 582             | 849         | 72                | 54            | 52             | 997           | 1521         | 98                          | 159       | 111                 | 5982  | 595027            | 995                                                  | 158    |
| 915-1120    | 1708                                                                                                         | 1020             | 1070            | 888         | 119               | 52            | 68             | 901           | 1562         | 31                          | 185       | 128                 | 7731  | 998813            | 1292                                                 | 179    |
| 1120-1500   | 937                                                                                                          | 309              | 464             | 732         | 121               | 35            | 68             | 758           | 1145         | 184                         | 140       | 101                 | 4992  | 878318            | 1760                                                 | 215    |
| 1500-1925   | 1205                                                                                                         | 636              | 911             | 1244        | 115               | 46            | 23             | 594           | 1890         | 70                          | 383       | 58                  | 7176  | 478087            | 666                                                  | 71     |
| 1925+       | 1654                                                                                                         | 837              | 1166            | 1277        | 83                | 62            | 142            | 762           | 2043         | 103                         | 258       | 431                 | 8819  | 782496            | 887                                                  | 128    |
| all classes | 1092                                                                                                         | 475              | 622             | 791         | 74                | 30            | 55             | 677           | 1490         | 132                         | 177       | 122                 | 5737  | 5611059           | 9781                                                 | 1327   |

1  
2  
3  
4  
5  
6  
7  
8  
9  
10  
11  
12  
13  
14  
15  
16  
17  
18  
19  
20  
21  
22  
23  
24  
25  
26  
27  
28  
29  
30  
31  
32  
33  
34  
35  
36  
37  
38  
39  
40  
41  
42  
43  
44  
45  
46  
47

Table (33): Average medical expenditure (Rs.) for treatment under different heads of treatment during stay at hospitals as inpatient during last 365 days per hospitalisation case receiving medical treatment for each type of hospital, mpce class of household

All-India Urban type of hospital: all

| mpce class  | average medical expenditure (Rs.) for treatment under different heads for treatment during stay at hospitals |                  |                 |             |                   |               |                |               |              |                             |           |                     |       | estd. expn. (000) | hosp. cases receiving med. treatment on payment (00) |        |
|-------------|--------------------------------------------------------------------------------------------------------------|------------------|-----------------|-------------|-------------------|---------------|----------------|---------------|--------------|-----------------------------|-----------|---------------------|-------|-------------------|------------------------------------------------------|--------|
|             | services                                                                                                     |                  |                 |             |                   |               |                | goods         |              |                             |           |                     | total |                   | estd. (00)                                           | sample |
|             | doctor's/surgeons fee                                                                                        |                  | diagnostic test | bed charges | attendant charges | physiotherapy | other services | medicines     |              | personal medical appliances | food etc. | blood, oxygen, etc. |       |                   |                                                      |        |
|             | hospital staff                                                                                               | other specialist |                 |             |                   |               |                | from hospital | from outside |                             |           |                     |       |                   |                                                      |        |
| (1)         | (2)                                                                                                          | (3)              | (4)             | (5)         | (6)               | (7)           | (8)            | (9)           | (10)         | (11)                        | (12)      | (13)                | (14)  | (15)              | (16)                                                 | (17)   |
| 10-300      | 515                                                                                                          | 212              | 199             | 198         | 11                | 0             | 1              | 271           | 1521         | 6                           | 115       | 36                  | 3086  | 213727            | 692                                                  | 98     |
| 300-350     | 84                                                                                                           | 67               | 153             | 103         | 31                | 4             | 27             | 77            | 955          | 22                          | 71        | 152                 | 1747  | 94058             | 538                                                  | 75     |
| 350-425     | 164                                                                                                          | 56               | 163             | 99          | 22                | 2             | 16             | 152           | 634          | 8                           | 94        | 25                  | 1435  | 182219            | 1270                                                 | 186    |
| 425-500     | 274                                                                                                          | 207              | 384             | 295         | 10                | 1             | 31             | 237           | 1328         | 54                          | 108       | 83                  | 3011  | 724050            | 2405                                                 | 354    |
| 500-575     | 130                                                                                                          | 43               | 248             | 178         | 17                | 5             | 17             | 125           | 954          | 7                           | 117       | 13                  | 1853  | 197073            | 1063                                                 | 157    |
| 575-665     | 479                                                                                                          | 34               | 189             | 332         | 8                 | 5             | 42             | 241           | 820          | 256                         | 102       | 53                  | 2560  | 567332            | 2216                                                 | 315    |
| 665-775     | 478                                                                                                          | 167              | 214             | 260         | 29                | 16            | 8              | 228           | 819          | 32                          | 137       | 38                  | 2427  | 616950            | 2542                                                 | 375    |
| 775-915     | 563                                                                                                          | 171              | 317             | 392         | 39                | 25            | 37             | 468           | 1112         | 46                          | 145       | 59                  | 3376  | 739391            | 2190                                                 | 374    |
| 915-1120    | 989                                                                                                          | 587              | 780             | 534         | 78                | 30            | 49             | 554           | 1421         | 25                          | 158       | 87                  | 5291  | 1206499           | 2280                                                 | 394    |
| 1120-1500   | 652                                                                                                          | 241              | 528             | 538         | 120               | 24            | 66             | 550           | 1240         | 170                         | 160       | 74                  | 4361  | 1115453           | 2558                                                 | 410    |
| 1500-1925   | 1005                                                                                                         | 501              | 839             | 988         | 109               | 36            | 36             | 500           | 1813         | 61                          | 326       | 57                  | 6270  | 531375            | 847                                                  | 120    |
| 1925+       | 1347                                                                                                         | 695              | 985             | 1044        | 81                | 68            | 128            | 613           | 1918         | 111                         | 246       | 367                 | 7602  | 891046            | 1172                                                 | 203    |
| all classes | 570                                                                                                          | 246              | 418             | 411         | 48                | 18            | 40             | 358           | 1169         | 80                          | 144       | 79                  | 3580  | 7079172           | 19776                                                | 3061   |

Table (33): Average medical expenditure (Rs.) for treatment under different heads of treatment during stay at hospitals as inpatient during last 365 days per hospitalisation case receiving medical treatment for each type of hospital, mpce class of household

| mpce class    | average medical expenditure (Rs.) for treatment under different heads for treatment during stay at hospitals |                    |                   |               |                       |                 |                  |                 |                |                                   |           |       | estd. expn. (000) | hosp. cases receiving med. treatment on payment (00) |        |                       |
|---------------|--------------------------------------------------------------------------------------------------------------|--------------------|-------------------|---------------|-----------------------|-----------------|------------------|-----------------|----------------|-----------------------------------|-----------|-------|-------------------|------------------------------------------------------|--------|-----------------------|
|               | services                                                                                                     |                    |                   |               |                       |                 | goods            |                 |                |                                   |           | total |                   | estd. (00)                                           | sample |                       |
|               | doctor's/ surgeons fee                                                                                       |                    | diag- nostic test | bed char- ges | atten- dant char- ges | physio- therapy | other servi- ces | medicines       |                | perso- nal medi- cal applia- nces | food etc. |       |                   |                                                      |        | blood, oxy- gen, etc. |
|               | hospital staff                                                                                               | other specia- list |                   |               |                       |                 |                  | from hos- pital | from out- side |                                   |           |       |                   |                                                      |        |                       |
| (1)           | (2)                                                                                                          | (3)                | (4)               | (5)           | (6)                   | (7)             | (8)              | (9)             | (10)           | (11)                              | (12)      | (13)  | (14)              | (15)                                                 | (16)   | (17)                  |
| 10 – 235      | 17                                                                                                           | 2                  | 40                | 3             | 8                     | 0               | 1                | 27              | 661            | 8                                 | 103       | 79    | 948               | 132447                                               | 1397   | 186                   |
| 2235 – 265    | 33                                                                                                           | 10                 | 110               | 5             | 8                     | 0               | 18               | 30              | 939            | 10                                | 88        | 81    | 1332              | 198617                                               | 1491   | 164                   |
| 24265 – 320   | 14                                                                                                           | 9                  | 89                | 5             | 9                     | 0               | 17               | 19              | 757            | 8                                 | 97        | 42    | 1066              | 316589                                               | 2970   | 378                   |
| 25320 – 365   | 14                                                                                                           | 16                 | 114               | 7             | 2                     | 0               | 9                | 31              | 725            | 4                                 | 114       | 17    | 1054              | 399496                                               | 3790   | 471                   |
| 26365 – 410   | 30                                                                                                           | 11                 | 201               | 16            | 3                     | 0               | 18               | 41              | 1029           | 6                                 | 163       | 9     | 1527              | 406986                                               | 2665   | 364                   |
| 27410 – 460   | 33                                                                                                           | 11                 | 96                | 16            | 7                     | 2               | 16               | 34              | 734            | 11                                | 142       | 35    | 1139              | 479057                                               | 4206   | 505                   |
| 28460 – 520   | 41                                                                                                           | 37                 | 190               | 50            | 8                     | 8               | 13               | 28              | 941            | 23                                | 116       | 26    | 1482              | 548665                                               | 3703   | 502                   |
| 29520 – 605   | 32                                                                                                           | 41                 | 211               | 31            | 16                    | 1               | 22               | 48              | 931            | 21                                | 142       | 49    | 1545              | 653091                                               | 4227   | 587                   |
| 31605 – 730   | 16                                                                                                           | 28                 | 222               | 39            | 22                    | 5               | 28               | 45              | 874            | 49                                | 133       | 13    | 1474              | 662396                                               | 4493   | 598                   |
| 32730 – 980   | 74                                                                                                           | 27                 | 263               | 34            | 36                    | 0               | 18               | 62              | 952            | 46                                | 134       | 34    | 1680              | 652678                                               | 3885   | 579                   |
| 33980 – 1285  | 80                                                                                                           | 56                 | 404               | 48            | 55                    | 13              | 79               | 79              | 1445           | 14                                | 143       | 64    | 2482              | 473334                                               | 1907   | 243                   |
| 341285 +      | 114                                                                                                          | 41                 | 289               | 108           | 12                    | 4               | 33               | 77              | 1262           | 20                                | 142       | 74    | 2176              | 393996                                               | 1811   | 251                   |
| 35all classes | 38                                                                                                           | 25                 | 185               | 29            | 15                    | 3               | 21               | 42              | 909            | 21                                | 129       | 37    | 1455              | 5317352                                              | 36545  | 4828                  |

1  
2  
3  
4  
5  
6  
7  
8  
9  
10  
11  
12  
13  
14  
15  
16  
17  
18  
19  
20  
21  
22  
23  
24  
25  
26  
27  
28  
29  
30  
31  
32  
33  
34  
35  
36  
37  
38  
39  
40  
41  
42  
43  
44  
45  
46  
47

Table (33): Average medical expenditure (Rs.) for treatment under different heads of treatment during stay at hospitals as inpatient during last 365 days per hospitalisation case receiving medical treatment for each type of hospital, mpce class of household

All-India Rural + Urban type of hospital: public dispensary

| mpce class  | average medical expenditure (Rs.) for treatment under different heads for treatment during stay at hospitals |                    |                   |               |                       |                 |                  |                 |                |                                   |           |       | estd. expn. (000) | hosp. cases receiving med. treatment on payment (00) |        |                       |
|-------------|--------------------------------------------------------------------------------------------------------------|--------------------|-------------------|---------------|-----------------------|-----------------|------------------|-----------------|----------------|-----------------------------------|-----------|-------|-------------------|------------------------------------------------------|--------|-----------------------|
|             | services                                                                                                     |                    |                   |               |                       |                 | goods            |                 |                |                                   |           | total |                   | estd. (00)                                           | sample |                       |
|             | doctor's/ surgeons fee                                                                                       |                    | diag- nostic test | bed char- ges | atten- dant char- ges | physio- therapy | other servi- ces | medicines       |                | perso- nal medi- cal applia- nces | food etc. |       |                   |                                                      |        | blood, oxy- gen, etc. |
|             | hospital staff                                                                                               | other specia- list |                   |               |                       |                 |                  | from hos- pital | from out- side |                                   |           |       |                   |                                                      |        |                       |
| (1)         | (2)                                                                                                          | (3)                | (4)               | (5)           | (6)                   | (7)             | (8)              | (9)             | (10)           | (11)                              | (12)      | (13)  | (14)              | (15)                                                 | (16)   | (17)                  |
| 10 – 235    | 11                                                                                                           | 0                  | 2                 | 0             | 20                    | 0               | 16               | 0               | 648            | 0                                 | 137       | 0     | 834               | 3476                                                 | 42     | 5                     |
| 235 – 265   | 11                                                                                                           | 72                 | 81                | 0             | 0                     | 0               | 8                | 0               | 1269           | 0                                 | 161       | 0     | 1602              | 5566                                                 | 35     | 8                     |
| 265 – 320   | 1                                                                                                            | 0                  | 46                | 0             | 0                     | 0               | 0                | 7               | 179            | 0                                 | 80        | 0     | 313               | 3314                                                 | 106    | 11                    |
| 320 – 365   | 13                                                                                                           | 132                | 83                | 0             | 0                     | 0               | 0                | 19              | 1640           | 0                                 | 173       | 38    | 2098              | 18659                                                | 89     | 13                    |
| 365 – 410   | 225                                                                                                          | 0                  | 616               | 110           | 23                    | 0               | 40               | 98              | 902            | 0                                 | 190       | 0     | 2203              | 24677                                                | 112    | 9                     |
| 410 – 460   | 7                                                                                                            | 0                  | 43                | 5             | 6                     | 0               | 0                | 3               | 1093           | 0                                 | 204       | 16    | 1377              | 15370                                                | 112    | 17                    |
| 460 – 520   | 207                                                                                                          | 4                  | 165               | 63            | 0                     | 23              | 1                | 0               | 820            | 0                                 | 73        | 23    | 1379              | 22662                                                | 164    | 16                    |
| 520 – 605   | 305                                                                                                          | 10                 | 109               | 10            | 0                     | 0               | 12               | 3               | 807            | 4                                 | 68        | 24    | 1352              | 32175                                                | 238    | 23                    |
| 605 – 730   | 208                                                                                                          | 48                 | 571               | 181           | 0                     | 0               | 5                | 167             | 1259           | 20                                | 449       | 42    | 2950              | 34643                                                | 117    | 22                    |
| 730 – 980   | 0                                                                                                            | 183                | 222               | 277           | 22                    | 0               | 63               | 75              | 1241           | 26                                | 131       | 0     | 2240              | 25226                                                | 113    | 11                    |
| 980 – 1285  | 1042                                                                                                         | 18                 | 301               | 473           | 28                    | 252             | 340              | 982             | 3640           | 12                                | 194       | 27    | 7310              | 67575                                                | 92     | 13                    |
| 1285 +      | 1078                                                                                                         | 581                | 539               | 435           | 194                   | 409             | 287              | 88              | 1345           | 215                               | 1012      | 341   | 6524              | 30357                                                | 47     | 5                     |
| all classes | 241                                                                                                          | 57                 | 227               | 112           | 14                    | 36              | 48               | 108             | 1163           | 14                                | 190       | 30    | 2241              | 283701                                               | 1266   | 153                   |

Table (33): Average medical expenditure (Rs.) for treatment under different heads of treatment during stay at hospitals as inpatient during last 365 days per hospitalisation case receiving medical treatment for each type of hospital, mpce class of household

All-India Rural + Urban type of hospital: public hospital + public dispensary

| mpce class     | average medical expenditure (Rs.) for treatment under different heads for treatment during stay at hospitals |                    |                   |               |                       |                 |                  |                 |                |                                   |           |       | estd. expn. (000) | hosp. cases receiving med. treatment on payment (00) |        |                       |
|----------------|--------------------------------------------------------------------------------------------------------------|--------------------|-------------------|---------------|-----------------------|-----------------|------------------|-----------------|----------------|-----------------------------------|-----------|-------|-------------------|------------------------------------------------------|--------|-----------------------|
|                | services                                                                                                     |                    |                   |               |                       |                 | goods            |                 |                |                                   |           | total |                   | estd. (00)                                           | sample |                       |
|                | doctor's/ surgeons fee                                                                                       |                    | diag- nostic test | bed char- ges | atten- dant char- ges | physio- therapy | other servi- ces | medicines       |                | perso- nal medi- cal applia- nces | food etc. |       |                   |                                                      |        | blood, oxy- gen, etc. |
|                | hospital staff                                                                                               | other specia- list |                   |               |                       |                 |                  | from hos- pital | from out- side |                                   |           |       |                   |                                                      |        |                       |
| (1)            | (2)                                                                                                          | (3)                | (4)               | (5)           | (6)                   | (7)             | (8)              | (9)             | (10)           | (11)                              | (12)      | (13)  | (14)              | (15)                                                 | (16)   | (17)                  |
| 10 – 235       | 16                                                                                                           | 2                  | 39                | 3             | 8                     | 0               | 2                | 27              | 660            | 8                                 | 104       | 77    | 945               | 135923                                               | 1438   | 191                   |
| 2235 – 265     | 32                                                                                                           | 11                 | 109               | 5             | 8                     | 0               | 18               | 29              | 947            | 10                                | 90        | 79    | 1338              | 204183                                               | 1526   | 172                   |
| 24265 – 320    | 14                                                                                                           | 9                  | 87                | 5             | 8                     | 0               | 16               | 19              | 737            | 7                                 | 97        | 40    | 1040              | 319903                                               | 3076   | 389                   |
| 25320 – 365    | 14                                                                                                           | 19                 | 114               | 7             | 2                     | 0               | 8                | 31              | 746            | 4                                 | 115       | 17    | 1078              | 418155                                               | 3879   | 484                   |
| 26365 – 410    | 37                                                                                                           | 11                 | 218               | 20            | 4                     | 0               | 19               | 43              | 1024           | 6                                 | 164       | 9     | 1554              | 431663                                               | 2777   | 373                   |
| 27410 – 460    | 33                                                                                                           | 11                 | 95                | 16            | 7                     | 2               | 16               | 33              | 744            | 10                                | 144       | 35    | 1145              | 494427                                               | 4318   | 522                   |
| 28460 – 520    | 48                                                                                                           | 35                 | 189               | 51            | 8                     | 9               | 13               | 27              | 936            | 22                                | 114       | 26    | 1477              | 571327                                               | 3867   | 518                   |
| 29520 – 605    | 47                                                                                                           | 39                 | 206               | 30            | 15                    | 1               | 21               | 46              | 924            | 20                                | 138       | 48    | 1535              | 685267                                               | 4465   | 610                   |
| 31605 – 730    | 20                                                                                                           | 29                 | 231               | 42            | 21                    | 5               | 28               | 48              | 884            | 49                                | 141       | 14    | 1512              | 697039                                               | 4610   | 620                   |
| 32730 – 980    | 72                                                                                                           | 32                 | 262               | 41            | 35                    | 0               | 20               | 62              | 960            | 45                                | 134       | 33    | 1696              | 677904                                               | 3998   | 590                   |
| 33980 – 1285   | 125                                                                                                          | 54                 | 399               | 68            | 54                    | 24              | 91               | 121             | 1547           | 14                                | 146       | 62    | 2705              | 540909                                               | 1999   | 256                   |
| 341285 +       | 138                                                                                                          | 54                 | 296               | 116           | 17                    | 14              | 39               | 77              | 1264           | 25                                | 164       | 81    | 2285              | 424353                                               | 1857   | 256                   |
| 35 all classes | 45                                                                                                           | 26                 | 187               | 32            | 15                    | 4               | 22               | 45              | 918            | 21                                | 131       | 37    | 1481              | 5601053                                              | 37811  | 4981                  |

1  
2  
3  
4  
5  
6  
7

Table (33): Average medical expenditure (Rs.) for treatment under different heads of treatment during stay at hospitals as inpatient during last 365 days per hospitalisation case receiving medical treatment for each type of hospital, mpce class of household

| All-India      |                                                                                                              | Rural + Urban      |                   |               |                       |                 |                  |                 |                |                                   |           |                       | type of hospital: private hospital |                   |                                                      |            |        |
|----------------|--------------------------------------------------------------------------------------------------------------|--------------------|-------------------|---------------|-----------------------|-----------------|------------------|-----------------|----------------|-----------------------------------|-----------|-----------------------|------------------------------------|-------------------|------------------------------------------------------|------------|--------|
| mpce class     | average medical expenditure (Rs.) for treatment under different heads for treatment during stay at hospitals |                    |                   |               |                       |                 |                  |                 |                |                                   |           |                       |                                    | estd. expn. (000) | hosp. cases receiving med. treatment on payment (00) |            |        |
|                | services                                                                                                     |                    |                   |               |                       |                 |                  | goods           |                |                                   |           |                       |                                    |                   | total                                                | estd. (00) | sample |
|                | doctor's/ surgeons fee                                                                                       |                    | diag- nostic test | bed char- ges | atten- dant char- ges | physio- therapy | other servi- ces | medicines       |                | perso- nal medi- cal applia- nces | food etc. | blood, oxy- gen, etc. |                                    |                   |                                                      |            |        |
|                | hospital staff                                                                                               | other specia- list |                   |               |                       |                 |                  | from hos- pital | from out- side |                                   |           |                       |                                    |                   |                                                      |            |        |
| (1)            | (2)                                                                                                          | (3)                | (4)               | (5)           | (6)                   | (7)             | (8)              | (9)             | (10)           | (11)                              | (12)      | (13)                  | (14)                               | (15)              | (16)                                                 | (17)       |        |
| 10 – 235       | 548                                                                                                          | 277                | 238               | 332           | 11                    | 0               | 0                | 292             | 1671           | 19                                | 143       | 32                    | 3563                               | 278613            | 782                                                  | 91         |        |
| 2235 – 265     | 299                                                                                                          | 182                | 294               | 501           | 82                    | 3               | 1                | 60              | 964            | 2                                 | 166       | 23                    | 2576                               | 193417            | 751                                                  | 62         |        |
| 24265 – 320    | 844                                                                                                          | 190                | 331               | 497           | 33                    | 3               | 11               | 499             | 1313           | 18                                | 208       | 21                    | 3968                               | 576371            | 1452                                                 | 194        |        |
| 25320 – 365    | 496                                                                                                          | 387                | 422               | 578           | 22                    | 1               | 35               | 561             | 1620           | 54                                | 161       | 165                   | 4501                               | 1008684           | 2241                                                 | 276        |        |
| 26365 – 410    | 512                                                                                                          | 290                | 353               | 452           | 37                    | 19              | 46               | 334             | 1087           | 8                                 | 247       | 22                    | 3407                               | 626267            | 1838                                                 | 212        |        |
| 27410 – 460    | 793                                                                                                          | 247                | 347               | 515           | 36                    | 25              | 44               | 359             | 1185           | 215                               | 191       | 103                   | 4059                               | 1129887           | 2784                                                 | 325        |        |
| 28460 – 520    | 871                                                                                                          | 304                | 376               | 517           | 51                    | 22              | 22               | 567             | 1005           | 8                                 | 223       | 64                    | 4030                               | 1422677           | 3531                                                 | 404        |        |
| 29520 – 605    | 770                                                                                                          | 382                | 517               | 681           | 90                    | 39              | 45               | 606             | 1499           | 31                                | 186       | 176                   | 5021                               | 2004523           | 3992                                                 | 451        |        |
| 31605 – 730    | 1284                                                                                                         | 416                | 556               | 734           | 70                    | 16              | 52               | 574             | 1392           | 15                                | 222       | 62                    | 5392                               | 2387265           | 4427                                                 | 482        |        |
| 32730 – 980    | 1194                                                                                                         | 370                | 505               | 799           | 120                   | 23              | 136              | 726             | 1511           | 145                               | 211       | 133                   | 5871                               | 3279757           | 5586                                                 | 559        |        |
| 33980 – 1285   | 1164                                                                                                         | 286                | 615               | 752           | 87                    | 48              | 39               | 348             | 1849           | 43                                | 305       | 105                   | 5640                               | 1445581           | 2563                                                 | 242        |        |
| 341285 +       | 1354                                                                                                         | 543                | 798               | 1017          | 83                    | 50              | 85               | 660             | 1941           | 58                                | 264       | 166                   | 7017                               | 2898911           | 4131                                                 | 383        |        |
| 35 all classes |                                                                                                              |                    |                   |               |                       |                 |                  |                 |                |                                   |           |                       | 1725195                            |                   |                                                      |            |        |
| 36             | 975                                                                                                          | 358                | 499               | 684           | 71                    | 26              | 59               | 543             | 1460           | 63                                | 218       | 108                   | 5062                               | 3                 | 34078                                                | 3681       |        |

37  
38  
39  
40  
41  
42  
43  
44  
45  
46  
47

Table (33): Average medical expenditure (Rs.) for treatment under different heads of treatment during stay at hospitals as inpatient during last 365 days per hospitalisation case receiving medical treatment for each type of hospital, mpce class of household

| All-India      |                                                                                                              | Rural + Urban      |                   |               |                       |                 |                  |                 |                |                                   |           |                       | type of hospital: all |                   |                                                      |        |
|----------------|--------------------------------------------------------------------------------------------------------------|--------------------|-------------------|---------------|-----------------------|-----------------|------------------|-----------------|----------------|-----------------------------------|-----------|-----------------------|-----------------------|-------------------|------------------------------------------------------|--------|
| mpce class     | average medical expenditure (Rs.) for treatment under different heads for treatment during stay at hospitals |                    |                   |               |                       |                 |                  |                 |                |                                   |           |                       |                       | estd. expn. (000) | hosp. cases receiving med. treatment on payment (00) |        |
|                | services                                                                                                     |                    |                   |               |                       |                 |                  | goods           |                |                                   |           |                       | total                 |                   | estd. (00)                                           | sample |
|                | doctor's/ surgeons fee                                                                                       |                    | diag- nostic test | bed char- ges | atten- dant char- ges | physio- therapy | other servi- ces | medicines       |                | perso- nal medi- cal applia- nces | food etc. | blood, oxy- gen, etc. |                       |                   |                                                      |        |
|                | hospital staff                                                                                               | other specia- list |                   |               |                       |                 |                  | from hos- pital | from out- side |                                   |           |                       |                       |                   |                                                      |        |
| (1)            | (2)                                                                                                          | (3)                | (4)               | (5)           | (6)                   | (7)             | (8)              | (9)             | (10)           | (11)                              | (12)      | (13)                  | (14)                  | (15)              | (16)                                                 | (17)   |
| 10 – 235       | 204                                                                                                          | 99                 | 109               | 119           | 9                     | 0               | 1                | 120             | 1016           | 12                                | 118       | 61                    | 1867                  | 414536            | 2220                                                 | 282    |
| 2235 – 265     | 120                                                                                                          | 68                 | 170               | 169           | 32                    | 1               | 12               | 39              | 952            | 7                                 | 115       | 60                    | 1746                  | 397600            | 2277                                                 | 234    |
| 24265 – 320    | 280                                                                                                          | 67                 | 165               | 163           | 16                    | 1               | 15               | 173             | 922            | 11                                | 132       | 34                    | 1979                  | 896275            | 4528                                                 | 583    |
| 25320 – 365    | 191                                                                                                          | 153                | 227               | 216           | 9                     | 0               | 18               | 225             | 1066           | 23                                | 132       | 71                    | 2331                  | 1426839           | 6120                                                 | 760    |
| 26365 – 410    | 227                                                                                                          | 122                | 271               | 192           | 17                    | 8               | 30               | 159             | 1050           | 7                                 | 197       | 14                    | 2292                  | 1059960           | 4624                                                 | 587    |
| 27410 – 460    | 330                                                                                                          | 104                | 194               | 212           | 18                    | 11              | 27               | 161             | 917            | 90                                | 162       | 61                    | 2288                  | 1625945           | 7107                                                 | 848    |
| 28460 – 520    | 441                                                                                                          | 164                | 278               | 273           | 28                    | 15              | 17               | 284             | 969            | 15                                | 166       | 44                    | 2695                  | 1994542           | 7400                                                 | 923    |
| 29520 – 605    | 388                                                                                                          | 201                | 353               | 337           | 50                    | 19              | 32               | 310             | 1195           | 25                                | 161       | 108                   | 3180                  | 2689790           | 8457                                                 | 1061   |
| 31605 – 730    | 639                                                                                                          | 220                | 390               | 381           | 45                    | 10              | 39               | 306             | 1133           | 32                                | 181       | 37                    | 3413                  | 3085506           | 9040                                                 | 1103   |
| 32730 – 980    | 726                                                                                                          | 229                | 403               | 482           | 85                    | 13              | 87               | 449             | 1281           | 103                               | 179       | 91                    | 4129                  | 3957661           | 9584                                                 | 1149   |
| 33980 – 1285   | 709                                                                                                          | 185                | 520               | 452           | 72                    | 37              | 62               | 248             | 1716           | 30                                | 235       | 86                    | 4354                  | 1986491           | 4563                                                 | 498    |
| 341285 +       | 977                                                                                                          | 391                | 642               | 738           | 62                    | 39              | 71               | 479             | 1731           | 48                                | 233       | 140                   | 5550                  | 3323264           | 5988                                                 | 639    |
| 35 all classes |                                                                                                              |                    |                   |               |                       |                 |                  |                 |                |                                   |           |                       | 2285840               |                   |                                                      |        |
| 36             | 486                                                                                                          | 183                | 335               | 341           | 42                    | 14              | 39               | 281             | 1175           | 41                                | 172       | 70                    | 3179                  | 7                 | 71909                                                | 8667   |



Table (34): Number per 1000 of hospitalised cases getting reimbursement, average amount of reimbursement and per 1000 distribution of such cases by source for mpce class of households

| All-India          |                                                          |                                                      |                                               |            |                             |                |             |                                          |            | Rural |  |
|--------------------|----------------------------------------------------------|------------------------------------------------------|-----------------------------------------------|------------|-----------------------------|----------------|-------------|------------------------------------------|------------|-------|--|
| mpce class         | no. per 1000 of hospitalised cases getting reimbursement | average amount of reimbursement (Rs.) per hosp. case | distribution of expenses reimbursed by source |            |                             |                |             | hospitalised cases getting reimbursement |            |       |  |
|                    |                                                          |                                                      | employer                                      |            | medical insurance companies | other agencies | total       | estd. (00)                               | sample     |       |  |
|                    |                                                          |                                                      | government                                    | private    |                             |                |             |                                          |            |       |  |
| (1)                | (2)                                                      | (3)                                                  | (4)                                           | (5)        | (6)                         | (7)            | (8)         | (9)                                      | (10)       |       |  |
| males              |                                                          |                                                      |                                               |            |                             |                |             |                                          |            |       |  |
| 0 – 225            | 9                                                        | 16                                                   | 796                                           | 19         | 92                          | 92             | 1000        | 27                                       | 3          |       |  |
| 225 – 255          | 2                                                        | 3                                                    | 0                                             | 500        | 0                           | 500            | 1000        | 3                                        | 1          |       |  |
| 255 – 300          | 3                                                        | 8                                                    | 252                                           | 69         | 118                         | 561            | 1000        | 15                                       | 4          |       |  |
| 300 – 340          | 2                                                        | 3                                                    | 692                                           | 103        | 103                         | 103            | 1000        | 11                                       | 4          |       |  |
| 340 – 380          | 12                                                       | 161                                                  | 150                                           | 763        | 0                           | 87             | 1000        | 80                                       | 7          |       |  |
| 380 – 420          | 4                                                        | 15                                                   | 191                                           | 415        | 6                           | 388            | 1000        | 40                                       | 6          |       |  |
| 420 – 470          | 5                                                        | 64                                                   | 94                                            | 750        | 6                           | 151            | 1000        | 42                                       | 7          |       |  |
| 470 – 525          | 1                                                        | 10                                                   | 332                                           | 415        | 107                         | 146            | 1000        | 11                                       | 6          |       |  |
| 525 – 615          | 3                                                        | 16                                                   | 1000                                          | 0          | 0                           | 0              | 1000        | 34                                       | 6          |       |  |
| 615 – 775          | 17                                                       | 111                                                  | 662                                           | 152        | 0                           | 187            | 1000        | 242                                      | 19         |       |  |
| 775 – 950          | 11                                                       | 330                                                  | 37                                            | 36         | 927                         | 0              | 1000        | 76                                       | 10         |       |  |
| 950 +              | 14                                                       | 400                                                  | 695                                           | 180        | 26                          | 99             | 1000        | 158                                      | 30         |       |  |
| <b>all classes</b> | <b>8</b>                                                 | <b>109</b>                                           | <b>455</b>                                    | <b>237</b> | <b>210</b>                  | <b>98</b>      | <b>1000</b> | <b>740</b>                               | <b>103</b> |       |  |
| females            |                                                          |                                                      |                                               |            |                             |                |             |                                          |            |       |  |
| 0 – 225            | 2                                                        | 10                                                   | 0                                             | 0          | 0                           | 1000           | 1000        | 5                                        | 1          |       |  |
| 225 – 255          | 3                                                        | 15                                                   | 250                                           | 250        | 250                         | 250            | 1000        | 6                                        | 1          |       |  |
| 255 – 300          | 10                                                       | 30                                                   | 411                                           | 222        | 183                         | 183            | 1000        | 44                                       | 4          |       |  |
| 300 – 340          | 0                                                        | 2                                                    | 1000                                          | 0          | 0                           | 0              | 1000        | 2                                        | 1          |       |  |
| 340 – 380          | 1                                                        | 2                                                    | 655                                           | 345        | 0                           | 0              | 1000        | 7                                        | 2          |       |  |
| 380 – 420          | 3                                                        | 3                                                    | 1000                                          | 0          | 0                           | 0              | 1000        | 25                                       | 3          |       |  |
| 420 – 470          | 14                                                       | 48                                                   | 327                                           | 216        | 161                         | 296            | 1000        | 111                                      | 8          |       |  |
| 470 – 525          | 3                                                        | 8                                                    | 8                                             | 420        | 3                           | 569            | 1000        | 27                                       | 7          |       |  |
| 525 – 615          | 3                                                        | 19                                                   | 931                                           | 9          | 9                           | 52             | 1000        | 31                                       | 6          |       |  |
| 615 – 775          | 5                                                        | 47                                                   | 592                                           | 407        | 0                           | 0              | 1000        | 61                                       | 8          |       |  |
| 775 – 950          | 6                                                        | 31                                                   | 996                                           | 1          | 1                           | 3              | 1000        | 40                                       | 9          |       |  |
| 950 +              | 16                                                       | 194                                                  | 821                                           | 0          | 165                         | 14             | 1000        | 147                                      | 22         |       |  |
| <b>all classes</b> | <b>6</b>                                                 | <b>42</b>                                            | <b>701</b>                                    | <b>112</b> | <b>115</b>                  | <b>72</b>      | <b>1000</b> | <b>506</b>                               | <b>72</b>  |       |  |
| persons            |                                                          |                                                      |                                               |            |                             |                |             |                                          |            |       |  |
| 0 – 225            | 6                                                        | 13                                                   | 514                                           | 12         | 60                          | 414            | 1000        | 32                                       | 4          |       |  |
| 225 – 255          | 2                                                        | 10                                                   | 213                                           | 287        | 213                         | 287            | 1000        | 10                                       | 2          |       |  |
| 255 – 300          | 6                                                        | 18                                                   | 371                                           | 184        | 167                         | 278            | 1000        | 59                                       | 8          |       |  |
| 300 – 340          | 1                                                        | 3                                                    | 780                                           | 73         | 73                          | 73             | 1000        | 13                                       | 5          |       |  |
| 340 – 380          | 7                                                        | 87                                                   | 154                                           | 759        | 0                           | 86             | 1000        | 87                                       | 9          |       |  |
| 380 – 420          | 4                                                        | 10                                                   | 314                                           | 352        | 5                           | 329            | 1000        | 65                                       | 9          |       |  |
| 420 – 470          | 9                                                        | 56                                                   | 192                                           | 526        | 71                          | 212            | 1000        | 152                                      | 15         |       |  |
| 470 – 525          | 2                                                        | 9                                                    | 191                                           | 418        | 62                          | 330            | 1000        | 38                                       | 13         |       |  |
| 525 – 615          | 3                                                        | 17                                                   | 966                                           | 4          | 4                           | 26             | 1000        | 65                                       | 12         |       |  |
| 615 – 775          | 11                                                       | 82                                                   | 644                                           | 218        | 0                           | 138            | 1000        | 303                                      | 27         |       |  |
| 775 – 950          | 9                                                        | 181                                                  | 119                                           | 33         | 847                         | 0              | 1000        | 116                                      | 19         |       |  |
| 950 +              | 15                                                       | 305                                                  | 732                                           | 127        | 66                          | 75             | 1000        | 305                                      | 52         |       |  |
| <b>all classes</b> | <b>7</b>                                                 | <b>78</b>                                            | <b>517</b>                                    | <b>205</b> | <b>186</b>                  | <b>91</b>      | <b>1000</b> | <b>1247</b>                              | <b>175</b> |       |  |

Table (34): Number per 1000 of hospitalised cases getting reimbursement, average amount of reimbursement and per 1000 distribution of such cases by source for mpce class of households

| All-India          |                                                          |                                                      |                                               |            |                             |                |             |                                          |            | Urban |  |
|--------------------|----------------------------------------------------------|------------------------------------------------------|-----------------------------------------------|------------|-----------------------------|----------------|-------------|------------------------------------------|------------|-------|--|
| mpce class         | no. per 1000 of hospitalised cases getting reimbursement | average amount of reimbursement (Rs.) per hosp. case | distribution of expenses reimbursed by source |            |                             |                |             | hospitalised cases getting reimbursement |            |       |  |
|                    |                                                          |                                                      | employer                                      |            | medical insurance companies | other agencies | total       | estd. (00)                               | sample     |       |  |
|                    |                                                          |                                                      | government                                    | private    |                             |                |             |                                          |            |       |  |
| (1)                | (2)                                                      | (3)                                                  | (4)                                           | (5)        | (6)                         | (7)            | (8)         | (9)                                      | (10)       |       |  |
| males              |                                                          |                                                      |                                               |            |                             |                |             |                                          |            |       |  |
| 0-300              | 24                                                       | 1689                                                 | 998                                           | 2          | 0                           | 0              | 1000        | 30                                       | 4          |       |  |
| 300-350            | 5                                                        | 23                                                   | 1000                                          | 0          | 0                           | 0              | 1000        | 4                                        | 1          |       |  |
| 350-425            | 0                                                        | 0                                                    | 0                                             | 0          | 0                           | 0              | 0           | 0                                        | 0          |       |  |
| 425-500            | 8                                                        | 127                                                  | 9                                             | 366        | 613                         | 12             | 1000        | 33                                       | 6          |       |  |
| 500-575            | 11                                                       | 115                                                  | 463                                           | 8          | 522                         | 8              | 1000        | 21                                       | 4          |       |  |
| 575-665            | 7                                                        | 141                                                  | 48                                            | 73         | 0                           | 879            | 1000        | 28                                       | 9          |       |  |
| 665-775            | 19                                                       | 61                                                   | 590                                           | 181        | 221                         | 8              | 1000        | 97                                       | 14         |       |  |
| 775-915            | 32                                                       | 200                                                  | 608                                           | 270        | 53                          | 69             | 1000        | 141                                      | 18         |       |  |
| 915-1120           | 25                                                       | 360                                                  | 701                                           | 63         | 230                         | 7              | 1000        | 119                                      | 24         |       |  |
| 1120-1500          | 28                                                       | 698                                                  | 703                                           | 178        | 102                         | 17             | 1000        | 179                                      | 42         |       |  |
| 1500-1925          | 181                                                      | 3133                                                 | 658                                           | 84         | 253                         | 5              | 1000        | 355                                      | 40         |       |  |
| 1925+              | 188                                                      | 5224                                                 | 221                                           | 218        | 514                         | 47             | 1000        | 609                                      | 69         |       |  |
| <b>all classes</b> | <b>40</b>                                                | <b>844</b>                                           | <b>445</b>                                    | <b>167</b> | <b>345</b>                  | <b>43</b>      | <b>1000</b> | <b>1617</b>                              | <b>231</b> |       |  |
| females            |                                                          |                                                      |                                               |            |                             |                |             |                                          |            |       |  |
| 0-300              | 1                                                        | 14                                                   | 1000                                          | 0          | 0                           | 0              | 1000        | 1                                        | 2          |       |  |
| 300-350            | 0                                                        | 0                                                    | 0                                             | 0          | 0                           | 0              | 0           | 0                                        | 0          |       |  |
| 350-425            | 0                                                        | 1                                                    | 1000                                          | 0          | 0                           | 0              | 1000        | 0                                        | 1          |       |  |
| 425-500            | 1                                                        | 3                                                    | 15                                            | 985        | 0                           | 0              | 1000        | 4                                        | 3          |       |  |
| 500-575            | 14                                                       | 147                                                  | 45                                            | 45         | 866                         | 45             | 1000        | 27                                       | 3          |       |  |
| 575-665            | 2                                                        | 24                                                   | 257                                           | 248        | 248                         | 248            | 1000        | 9                                        | 2          |       |  |
| 665-775            | 27                                                       | 119                                                  | 399                                           | 105        | 390                         | 105            | 1000        | 108                                      | 10         |       |  |
| 775-915            | 29                                                       | 87                                                   | 225                                           | 1          | 501                         | 273            | 1000        | 128                                      | 19         |       |  |
| 915-1120           | 29                                                       | 284                                                  | 229                                           | 17         | 752                         | 3              | 1000        | 144                                      | 28         |       |  |
| 1120-1500          | 51                                                       | 546                                                  | 293                                           | 146        | 560                         | 1              | 1000        | 262                                      | 30         |       |  |
| 1500-1925          | 100                                                      | 1091                                                 | 724                                           | 27         | 211                         | 38             | 1000        | 189                                      | 26         |       |  |
| 1925+              | 153                                                      | 3046                                                 | 188                                           | 197        | 449                         | 166            | 1000        | 544                                      | 72         |       |  |
| <b>all classes</b> | <b>38</b>                                                | <b>497</b>                                           | <b>272</b>                                    | <b>148</b> | <b>467</b>                  | <b>113</b>     | <b>1000</b> | <b>1417</b>                              | <b>196</b> |       |  |
| persons            |                                                          |                                                      |                                               |            |                             |                |             |                                          |            |       |  |
| 0-300              | 15                                                       | 1016                                                 | 998                                           | 2          | 0                           | 0              | 1000        | 30                                       | 6          |       |  |
| 300-350            | 3                                                        | 11                                                   | 1000                                          | 0          | 0                           | 0              | 1000        | 4                                        | 1          |       |  |
| 350-425            | 0                                                        | 0                                                    | 1000                                          | 0          | 0                           | 0              | 1000        | 0                                        | 1          |       |  |
| 425-500            | 5                                                        | 69                                                   | 10                                            | 381        | 598                         | 11             | 1000        | 37                                       | 9          |       |  |
| 500-575            | 12                                                       | 131                                                  | 229                                           | 28         | 714                         | 28             | 1000        | 49                                       | 7          |       |  |
| 575-665            | 5                                                        | 81                                                   | 80                                            | 100        | 38                          | 782            | 1000        | 37                                       | 11         |       |  |
| 665-775            | 22                                                       | 86                                                   | 475                                           | 135        | 323                         | 67             | 1000        | 206                                      | 24         |       |  |
| 775-915            | 31                                                       | 144                                                  | 493                                           | 189        | 187                         | 130            | 1000        | 270                                      | 37         |       |  |
| 915-1120           | 27                                                       | 322                                                  | 489                                           | 42         | 464                         | 5              | 1000        | 263                                      | 52         |       |  |
| 1120-1500          | 38                                                       | 630                                                  | 545                                           | 166        | 278                         | 11             | 1000        | 441                                      | 72         |       |  |
| 1500-1925          | 141                                                      | 2131                                                 | 675                                           | 69         | 242                         | 13             | 1000        | 543                                      | 66         |       |  |
| 1925+              | 170                                                      | 4082                                                 | 208                                           | 210        | 489                         | 94             | 1000        | 1154                                     | 141        |       |  |
| <b>all classes</b> | <b>39</b>                                                | <b>677</b>                                           | <b>384</b>                                    | <b>160</b> | <b>388</b>                  | <b>68</b>      | <b>1000</b> | <b>3034</b>                              | <b>427</b> |       |  |

Table (34): Number per 1000 of hospitalised cases getting reimbursement, average amount of reimbursement and per 1000 distribution of such cases by source for mpce class of households

| All-India          |                                                          |                                                      | Rural + Urban                                 |            |                             |                |             |                                          |            |
|--------------------|----------------------------------------------------------|------------------------------------------------------|-----------------------------------------------|------------|-----------------------------|----------------|-------------|------------------------------------------|------------|
| mpce class         | no. per 1000 of hospitalised cases getting reimbursement | average amount of reimbursement (Rs.) per hosp. case | distribution of expenses reimbursed by source |            |                             |                |             | hospitalised cases getting reimbursement |            |
|                    |                                                          |                                                      | employer                                      |            | medical insurance companies | other agencies | total       | estd. (00)                               | sample     |
|                    |                                                          |                                                      | government                                    | private    |                             |                |             |                                          |            |
| (1)                | (2)                                                      | (3)                                                  | (4)                                           | (5)        | (6)                         | (7)            | (8)         | (9)                                      | (10)       |
| males              |                                                          |                                                      |                                               |            |                             |                |             |                                          |            |
| 0 – 235            | 14                                                       | 507                                                  | 994                                           | 2          | 2                           | 2              | 1000        | 57                                       | 7          |
| 235 – 265          | 3                                                        | 8                                                    | 714                                           | 143        | 0                           | 143            | 1000        | 7                                        | 2          |
| 265 – 320          | 2                                                        | 6                                                    | 252                                           | 69         | 118                         | 561            | 1000        | 15                                       | 4          |
| 320 – 365          | 4                                                        | 52                                                   | 37                                            | 356        | 592                         | 15             | 1000        | 44                                       | 10         |
| 365 – 410          | 11                                                       | 151                                                  | 203                                           | 634        | 89                          | 74             | 1000        | 101                                      | 11         |
| 410 – 460          | 5                                                        | 51                                                   | 77                                            | 144        | 1                           | 777            | 1000        | 68                                       | 15         |
| 460 – 520          | 10                                                       | 63                                                   | 279                                           | 537        | 86                          | 97             | 1000        | 139                                      | 21         |
| 520 – 605          | 11                                                       | 68                                                   | 581                                           | 284        | 58                          | 77             | 1000        | 153                                      | 24         |
| 605 – 730          | 9                                                        | 114                                                  | 731                                           | 56         | 207                         | 6              | 1000        | 154                                      | 30         |
| 730 – 980          | 20                                                       | 291                                                  | 692                                           | 171        | 75                          | 62             | 1000        | 421                                      | 61         |
| 980 – 1285         | 50                                                       | 962                                                  | 493                                           | 71         | 432                         | 4              | 1000        | 431                                      | 50         |
| 1285 +             | 53                                                       | 1485                                                 | 320                                           | 210        | 412                         | 58             | 1000        | 767                                      | 99         |
| <b>all classes</b> | <b>17</b>                                                | <b>326</b>                                           | <b>448</b>                                    | <b>183</b> | <b>313</b>                  | <b>56</b>      | <b>1000</b> | <b>2357</b>                              | <b>334</b> |
| females            |                                                          |                                                      |                                               |            |                             |                |             |                                          |            |
| 0 – 235            | 2                                                        | 11                                                   | 313                                           | 0          | 0                           | 687            | 1000        | 6                                        | 3          |
| 235 – 265          | 2                                                        | 12                                                   | 250                                           | 250        | 250                         | 250            | 1000        | 6                                        | 1          |
| 265 – 320          | 7                                                        | 21                                                   | 418                                           | 220        | 181                         | 181            | 1000        | 45                                       | 5          |
| 320 – 365          | 1                                                        | 2                                                    | 416                                           | 584        | 0                           | 0              | 1000        | 6                                        | 4          |
| 365 – 410          | 4                                                        | 38                                                   | 64                                            | 54         | 838                         | 43             | 1000        | 35                                       | 5          |
| 410 – 460          | 3                                                        | 11                                                   | 409                                           | 197        | 197                         | 197            | 1000        | 34                                       | 5          |
| 460 – 520          | 18                                                       | 72                                                   | 367                                           | 154        | 288                         | 190            | 1000        | 219                                      | 18         |
| 520 – 605          | 11                                                       | 32                                                   | 190                                           | 69         | 420                         | 321            | 1000        | 155                                      | 26         |
| 605 – 730          | 12                                                       | 107                                                  | 311                                           | 16         | 665                         | 8              | 1000        | 174                                      | 34         |
| 730 – 980          | 19                                                       | 196                                                  | 343                                           | 190        | 465                         | 1              | 1000        | 323                                      | 38         |
| 980 – 1285         | 27                                                       | 264                                                  | 749                                           | 25         | 192                         | 35             | 1000        | 228                                      | 35         |
| 1285 +             | 53                                                       | 976                                                  | 279                                           | 169        | 408                         | 144            | 1000        | 692                                      | 94         |
| <b>all classes</b> | <b>16</b>                                                | <b>182</b>                                           | <b>340</b>                                    | <b>143</b> | <b>411</b>                  | <b>106</b>     | <b>1000</b> | <b>1923</b>                              | <b>268</b> |
| persons            |                                                          |                                                      |                                               |            |                             |                |             |                                          |            |
| 0 – 235            | 8                                                        | 285                                                  | 982                                           | 2          | 2                           | 14             | 1000        | 63                                       | 10         |
| 235 – 265          | 2                                                        | 10                                                   | 424                                           | 210        | 156                         | 210            | 1000        | 14                                       | 3          |
| 265 – 320          | 4                                                        | 13                                                   | 376                                           | 182        | 165                         | 276            | 1000        | 59                                       | 9          |
| 320 – 365          | 3                                                        | 30                                                   | 51                                            | 364        | 570                         | 15             | 1000        | 50                                       | 14         |
| 365 – 410          | 8                                                        | 98                                                   | 178                                           | 529        | 225                         | 68             | 1000        | 136                                      | 16         |
| 410 – 460          | 4                                                        | 32                                                   | 128                                           | 152        | 31                          | 688            | 1000        | 102                                      | 20         |
| 460 – 520          | 14                                                       | 67                                                   | 324                                           | 344        | 188                         | 144            | 1000        | 358                                      | 39         |
| 520 – 605          | 11                                                       | 50                                                   | 457                                           | 216        | 173                         | 154            | 1000        | 308                                      | 50         |
| 605 – 730          | 10                                                       | 111                                                  | 540                                           | 38         | 415                         | 7              | 1000        | 328                                      | 64         |
| 730 – 980          | 20                                                       | 248                                                  | 568                                           | 178        | 214                         | 40             | 1000        | 744                                      | 99         |
| 980 – 1285         | 38                                                       | 614                                                  | 548                                           | 61         | 381                         | 10             | 1000        | 660                                      | 85         |
| 1285 +             | 53                                                       | 1243                                                 | 305                                           | 195        | 411                         | 90             | 1000        | 1459                                     | 193        |
| <b>all classes</b> | <b>17</b>                                                | <b>258</b>                                           | <b>412</b>                                    | <b>170</b> | <b>345</b>                  | <b>73</b>      | <b>1000</b> | <b>4280</b>                              | <b>602</b> |

Table (35): Number per 1000 of persons reporting ailment during the last 15 days by sex and age-group for each State/UT

## Rural

| state / ut        | male              |         |         |         |            |     | female            |         |         |         |            |      | person            |         |         |         |            |      | persons            |        |     |
|-------------------|-------------------|---------|---------|---------|------------|-----|-------------------|---------|---------|---------|------------|------|-------------------|---------|---------|---------|------------|------|--------------------|--------|-----|
|                   | age group (years) |         |         |         |            |     | age group (years) |         |         |         |            |      | age group (years) |         |         |         |            |      | reporting ailment* |        |     |
|                   | 0 - 14            | 15 - 29 | 30 - 44 | 45 - 59 | 60 & above | all | 0 - 14            | 15 - 29 | 30 - 44 | 45 - 59 | 60 & above | all  | 0 - 14            | 15 - 29 | 30 - 44 | 45 - 59 | 60 & above | all  | estd. no. (00)     | sample |     |
| (1)               | (2)               | (3)     | (4)     | (5)     | (6)        | (7) | (8)               | (9)     | (10)    | (11)    | (12)       | (13) | (14)              | (15)    | (16)    | (17)    | (18)       | (19) | (20)               | (21)   |     |
| Andhra            |                   |         |         |         |            |     |                   |         |         |         |            |      |                   |         |         |         |            |      |                    |        |     |
| Pradesh           | 76                | 30      | 57      | 123     | 344        | 86  | 57                | 38      | 79      | 145     | 372        | 93   | 67                | 34      | 68      | 134     | 359        | 90   | 46725              | 1619   |     |
| Arunachal Pradesh | 55                | 48      | 38      | 46      | 246        | 61  | 49                | 62      | 30      | 79      | 214        | 61   | 52                | 55      | 34      | 61      | 231        | 61   | 480                | 242    |     |
| Assam             | 96                | 34      | 35      | 65      | 363        | 78  | 97                | 43      | 52      | 94      | 407        | 86   | 96                | 38      | 43      | 79      | 381        | 82   | 17667              | 884    |     |
| Bihar             | 61                | 22      | 22      | 51      | 180        | 53  | 63                | 22      | 38      | 62      | 157        | 53   | 62                | 22      | 30      | 56      | 170        | 53   | 32720              | 1101   |     |
| Chhattisgarh      | 63                | 46      | 72      | 88      | 156        | 69  | 59                | 49      | 80      | 79      | 146        | 70   | 61                | 47      | 76      | 83      | 150        | 69   | 12059              | 445    |     |
| Delhi             | 9                 | 0       | 0       | 0       | 0          | 4   | 0                 | 9       | 0       | 0       | 0          | 4    | 5                 | 6       | 0       | 0       | 0          | 4    | 69                 | 3      |     |
| Goa               | 173               | 0       | 93      | 136     | 650        | 137 | 51                | 11      | 95      | 203     | 628        | 138  | 106               | 5       | 94      | 167     | 638        | 138  | 1544               | 39     |     |
| Gujarat           | 58                | 29      | 50      | 62      | 358        | 70  | 52                | 38      | 52      | 103     | 244        | 70   | 68                | 55      | 34      | 51      | 83         | 302  | 69                 | 21330  | 632 |
| Haryana           | 67                | 63      | 76      | 119     | 245        | 86  | 61                | 96      | 132     | 140     | 213        | 106  | 65                | 78      | 104     | 129     | 229        | 95   | 13735              | 508    |     |
| Himachal Pradesh  | 44                | 31      | 50      | 109     | 288        | 73  | 38                | 41      | 151     | 173     | 261        | 101  | 41                | 37      | 101     | 143     | 274        | 87   | 4610               | 655    |     |
| Jammu & Kashmir   | 68                | 18      | 36      | 86      | 338        | 70  | 51                | 29      | 72      | 82      | 353        | 69   | 60                | 23      | 54      | 84      | 344        | 70   | 4157               | 351    |     |
| Jharkhand         | 33                | 7       | 9       | 16      | 96         | 24  | 46                | 37      | 31      | 53      | 69         | 43   | 39                | 20      | 20      | 34      | 85         | 33   | 6398               | 249    |     |
| Karnataka         | 45                | 19      | 38      | 90      | 331        | 63  | 47                | 27      | 47      | 107     | 258        | 64   | 46                | 23      | 42      | 98      | 296        | 64   | 20918              | 707    |     |
| Kerala            | 222               | 118     | 192     | 315     | 562        | 242 | 186               | 160     | 220     | 390     | 586        | 266  | 205               | 141     | 207     | 353     | 575        | 255  | 59661              | 2155   |     |
| Madhya Pradesh    | 48                | 36      | 49      | 51      | 225        | 57  | 40                | 47      | 78      | 101     | 200        | 66   | 44                | 42      | 63      | 74      | 213        | 61   | 27731              | 848    |     |
| Maharashtra       | 78                | 33      | 51      | 100     | 313        | 84  | 83                | 60      | 91      | 118     | 301        | 103  | 81                | 46      | 71      | 109     | 307        | 93   | 52275              | 1449   |     |
| Manipur           | 41                | 11      | 18      | 22      | 70         | 27  | 36                | 14      | 30      | 33      | 86         | 30   | 38                | 12      | 25      | 27      | 77         | 28   | 411                | 158    |     |
| Meghalaya         | 71                | 30      | 25      | 9       | 165        | 51  | 48                | 26      | 35      | 115     | 172        | 51   | 60                | 28      | 30      | 59      | 168        | 51   | 970                | 154    |     |
| Mizoram           | 34                | 17      | 3       | 12      | 84         | 23  | 27                | 4       | 13      | 0       | 105        | 18   | 31                | 10      | 8       | 6       | 92         | 20   | 80                 | 34     |     |
| Nagaland          | 114               | 12      | 0       | 31      | 251        | 61  | 76                | 92      | 6       | 69      | 147        | 63   | 95                | 50      | 3       | 50      | 223        | 62   | 257                | 74     |     |
| Orissa            | 83                | 49      | 64      | 87      | 163        | 79  | 74                | 48      | 73      | 90      | 159        | 76   | 79                | 49      | 68      | 89      | 161        | 77   | 23398              | 761    |     |
| Punjab            | 95                | 69      | 99      | 157     | 303        | 114 | 78                | 99      | 202     | 261     | 417        | 160  | 87                | 83      | 151     | 205     | 358        | 136  | 21168              | 647    |     |
| Rajasthan         | 46                | 26      | 47      | 83      | 164        | 52  | 36                | 46      | 83      | 97      | 135        | 61   | 42                | 36      | 65      | 90      | 149        | 57   | 22848              | 921    |     |
| Sikkim            | 83                | 38      | 36      | 105     | 195        | 69  | 47                | 1       | 56      | 18      | 203        | 40   | 64                | 19      | 46      | 68      | 199        | 55   | 212                | 124    |     |

Continued

Table (35): Number per 1000 of persons reporting ailment during the last 15 days by sex and age-group for each State/UT

## Rural

| state / ut                                   | male              |         |         |         |            |         | female            |         |         |         |            |         | person            |         |         |         |            |         | persons reporting ailment* |        |
|----------------------------------------------|-------------------|---------|---------|---------|------------|---------|-------------------|---------|---------|---------|------------|---------|-------------------|---------|---------|---------|------------|---------|----------------------------|--------|
|                                              | age group (years) |         |         |         |            |         | age group (years) |         |         |         |            |         | age group (years) |         |         |         |            |         | estd. no. (00)             | sample |
|                                              | 0 - 14            | 15 - 29 | 30 - 44 | 45 - 59 | 60 & above | all     | 0 - 14            | 15 - 29 | 30 - 44 | 45 - 59 | 60 & above | all     | 0 - 14            | 15 - 29 | 30 - 44 | 45 - 59 | 60 & above | all     |                            |        |
| (1)                                          | (2)               | (3)     | (4)     | (5)     | (6)        | (7)     | (8)               | (9)     | (10)    | (11)    | (12)       | (13)    | (14)              | (15)    | (16)    | (17)    | (18)       | (19)    | (20)                       | (21)   |
| Tamil Nadu                                   | 69                | 29      | 57      | 138     | 287        | 86      | 56                | 54      | 130     | 122     | 296        | 103     | 63                | 43      | 95      | 130     | 292        | 95      | 37581                      | 1102   |
| Tripura                                      | 186               | 71      | 85      | 104     | 264        | 126     | 147               | 88      | 124     | 155     | 330        | 135     | 169               | 80      | 103     | 131     | 291        | 130     | 3407                       | 501    |
| Uttaranchal                                  | 61                | 39      | 11      | 39      | 165        | 54      | 23                | 49      | 83      | 22      | 135        | 49      | 45                | 44      | 48      | 30      | 152        | 52      | 3293                       | 120    |
| Uttar Pradesh                                | 87                | 55      | 87      | 119     | 286        | 96      | 72                | 81      | 118     | 162     | 266        | 104     | 80                | 68      | 103     | 140     | 276        | 100     | 128696                     | 4368   |
| West Bengal                                  | 110               | 55      | 99      | 162     | 357        | 115     | 98                | 61      | 100     | 155     | 369        | 113     | 104               | 58      | 99      | 158     | 363        | 114     | 66800                      | 1839   |
| A & N Islands                                | 10                | 0       | 53      | 63      | 297        | 41      | 106               | 23      | 16      | 87      | 187        | 63      | 50                | 12      | 36      | 73      | 257        | 51      | 115                        | 36     |
| Chandigarh                                   | 23                | 4       | 37      | 15      | 508        | 26      | 116               | 53      | 75      | 58      | 323        | 89      | 70                | 22      | 51      | 33      | 409        | 52      | 47                         | 40     |
| Dadra & N. Haveli                            | 16                | 5       | 13      | 0       | 13         | 10      | 22                | 25      | 0       | 25      | 95         | 21      | 19                | 15      | 7       | 11      | 39         | 15      | 35                         | 13     |
| Daman & Diu                                  | 37                | 2       | 0       | 0       | 0          | 6       | 34                | 28      | 0       | 263     | 155        | 43      | 35                | 10      | 0       | 127     | 119        | 19      | 18                         | 14     |
| Lakshadweep                                  | 67                | 49      | 49      | 95      | 380        | 81      | 67                | 72      | 62      | 372     | 617        | 142     | 67                | 61      | 55      | 228     | 508        | 112     | 27                         | 58     |
| Pondicherry                                  | 196               | 124     | 84      | 34      | 532        | 162     | 108               | 0       | 94      | 84      | 724        | 132     | 161               | 70      | 89      | 62      | 624        | 149     | 490                        | 58     |
| ONES                                         | 99                | 42      | 44      | 56      | 197        | 73      | 72                | 50      | 60      | 99      | 220        | 73      | 86                | 46      | 52      | 77      | 207        | 73      | 5817                       | 1287   |
| GUTs                                         | 75                | 38      | 48      | 31      | 343        | 69      | 79                | 21      | 50      | 82      | 492        | 79      | 77                | 31      | 49      | 55      | 408        | 73      | 733                        | 219    |
| all-India                                    | 76                | 41      | 64      | 107     | 285        | 83      | 68                | 57      | 93      | 132     | 282        | 93      | 72                | 49      | 78      | 119     | 283        | 88      | 631934                     | 22909  |
| estd. no. of persons reporting ailment* (00) | 104236            | 36970   | 43897   | 45571   | 74362      | 305036  | 85021             | 51105   | 63830   | 55366   | 71576      | 326898  | 189257            | 88074   | 107728  | 100937  | 145938     | 631934  | X                          | X      |
| sample persons reporting ailment*            | 3251              | 1399    | 1536    | 1688    | 3413       | 11287   | 2576              | 1727    | 2083    | 2116    | 3120       | 11622   | 5827              | 3126    | 3619    | 3804    | 6533       | 22909   | X                          | X      |
| estd. no. of persons (00)                    | 1373037           | 908479  | 690923  | 424407  | 260664     | 3657509 | 1256497           | 900801  | 689161  | 420608  | 254124     | 3521192 | 2629534           | 1809280 | 1380084 | 845015  | 514787     | 7178701 | X                          | X      |
| sample persons                               | 45943             | 33016   | 23467   | 14369   | 11834      | 128629  | 41673             | 32360   | 22896   | 15486   | 10934      | 123349  | 87616             | 65376   | 46363   | 29855   | 22768      | 251978  | X                          | X      |

\*during the last 15 days

Table (35): Number per 1000 of persons reporting ailment during the last 15 days by sex and age-group for each State/UT

## Urban

| state / ut        | male              |         |         |         |            |     | female            |         |         |         |            |      | person            |         |         |         |            |      | persons reporting ailment* |        |
|-------------------|-------------------|---------|---------|---------|------------|-----|-------------------|---------|---------|---------|------------|------|-------------------|---------|---------|---------|------------|------|----------------------------|--------|
|                   | age group (years) |         |         |         |            |     | age group (years) |         |         |         |            |      | age group (years) |         |         |         |            |      |                            |        |
|                   | 0 - 14            | 15 - 29 | 30 - 44 | 45 - 59 | 60 & above | all | 0 - 14            | 15 - 29 | 30 - 44 | 45 - 59 | 60 & above | all  | 0 - 14            | 15 - 29 | 30 - 44 | 45 - 59 | 60 & above | all  | estd. no. (00)             | sample |
| (1)               | (2)               | (3)     | (4)     | (5)     | (6)        | (7) | (8)               | (9)     | (10)    | (11)    | (12)       | (13) | (14)              | (15)    | (16)    | (17)    | (18)       | (19) | (20)                       | (21)   |
| Andhra Pradesh    | 77                | 35      | 106     | 142     | 511        | 102 | 104               | 68      | 74      | 197     | 562        | 127  | 90                | 51      | 91      | 170     | 538        | 114  | 22574                      | 1152   |
| Arunachal Pradesh | 71                | 54      | 15      | 7       | 60         | 46  | 78                | 29      | 56      | 3       | 211        | 57   | 75                | 41      | 34      | 6       | 122        | 51   | 52                         | 73     |
| Assam             | 67                | 32      | 54      | 59      | 400        | 72  | 106               | 42      | 79      | 120     | 322        | 95   | 85                | 37      | 66      | 85      | 365        | 83   | 1868                       | 185    |
| Bihar             | 31                | 32      | 27      | 179     | 246        | 63  | 59                | 37      | 57      | 65      | 239        | 64   | 44                | 34      | 41      | 126     | 243        | 63   | 4631                       | 243    |
| Chhattisgarh      | 48                | 44      | 23      | 132     | 249        | 63  | 46                | 38      | 75      | 220     | 202        | 81   | 47                | 41      | 48      | 171     | 224        | 72   | 2035                       | 170    |
| Delhi             | 9                 | 11      | 5       | 13      | 135        | 15  | 8                 | 6       | 15      | 17      | 155        | 17   | 8                 | 9       | 10      | 15      | 145        | 16   | 1575                       | 111    |
| Goa               | 71                | 85      | 94      | 11      | 163        | 77  | 107               | 50      | 89      | 102     | 399        | 115  | 88                | 69      | 91      | 55      | 291        | 95   | 532                        | 51     |
| Gujarat           | 80                | 29      | 54      | 94      | 380        | 77  | 50                | 36      | 75      | 122     | 288        | 78   | 66                | 32      | 64      | 108     | 331        | 78   | 12335                      | 605    |
| Haryana           | 52                | 82      | 63      | 125     | 320        | 86  | 41                | 64      | 109     | 134     | 252        | 89   | 47                | 74      | 84      | 129     | 281        | 87   | 4202                       | 277    |
| Himachal Pradesh  | 42                | 5       | 14      | 59      | 317        | 39  | 53                | 43      | 95      | 104     | 310        | 78   | 48                | 24      | 54      | 81      | 313        | 59   | 341                        | 88     |
| Jammu & Kashmir   | 86                | 34      | 17      | 103     | 383        | 75  | 70                | 18      | 56      | 196     | 312        | 81   | 78                | 26      | 37      | 147     | 351        | 78   | 1062                       | 166    |
| Jharkhand         | 35                | 34      | 9       | 44      | 203        | 42  | 30                | 36      | 36      | 181     | 111        | 59   | 33                | 35      | 22      | 109     | 158        | 50   | 1968                       | 152    |
| Karnataka         | 39                | 28      | 32      | 73      | 285        | 53  | 33                | 15      | 55      | 88      | 363        | 61   | 36                | 21      | 44      | 81      | 324        | 57   | 7758                       | 595    |
| Kerala            | 255               | 122     | 137     | 322     | 529        | 235 | 198               | 136     | 153     | 363     | 574        | 244  | 226               | 129     | 146     | 344     | 554        | 240  | 19647                      | 1063   |
| Madhya Pradesh    | 74                | 25      | 41      | 52      | 246        | 60  | 52                | 40      | 74      | 104     | 252        | 71   | 64                | 32      | 57      | 77      | 249        | 65   | 9589                       | 561    |
| Maharashtra       | 121               | 60      | 71      | 162     | 400        | 115 | 79                | 59      | 105     | 198     | 437        | 122  | 101               | 60      | 88      | 179     | 419        | 118  | 44858                      | 1667   |
| Manipur           | 40                | 10      | 13      | 2       | 42         | 20  | 44                | 11      | 40      | 24      | 87         | 34   | 42                | 11      | 28      | 13      | 64         | 27   | 151                        | 79     |
| Meghalaya         | 51                | 3       | 7       | 15      | 55         | 20  | 95                | 49      | 11      | 186     | 180        | 75   | 76                | 30      | 9       | 94      | 127        | 50   | 140                        | 60     |
| Mizoram           | 16                | 9       | 4       | 6       | 120        | 17  | 30                | 5       | 8       | 9       | 120        | 18   | 23                | 7       | 6       | 8       | 120        | 17   | 50                         | 90     |
| Nagaland          | 102               | 0       | 0       | 7       | 255        | 58  | 86                | 13      | 15      | 68      | 0          | 46   | 95                | 7       | 7       | 37      | 229        | 52   | 125                        | 34     |
| Orissa            | 89                | 8       | 47      | 55      | 149        | 56  | 56                | 29      | 27      | 78      | 199        | 52   | 74                | 19      | 38      | 66      | 171        | 54   | 2195                       | 177    |
| Punjab            | 82                | 76      | 90      | 119     | 288        | 100 | 72                | 48      | 113     | 260     | 341        | 115  | 77                | 63      | 100     | 185     | 313        | 107  | 8130                       | 408    |
| Rajasthan         | 64                | 35      | 59      | 81      | 278        | 69  | 51                | 44      | 107     | 76      | 254        | 76   | 58                | 40      | 84      | 79      | 266        | 72   | 7589                       | 520    |
| Sikkim            | 4                 | 14      | 0       | 0       | 29         | 8   | 16                | 14      | 0       | 33      | 262        | 18   | 10                | 14      | 0       | 10      | 122        | 13   | 7                          | 13     |

Continued

Table (35): Number per 1000 of persons reporting ailment during the last 15 days by sex and age-group for each State/UT

## Urban

| state / ut                                   | male              |         |         |         |            |         | female            |         |         |         |            |         | person            |         |         |         |            |         | persons reporting ailment* |        |
|----------------------------------------------|-------------------|---------|---------|---------|------------|---------|-------------------|---------|---------|---------|------------|---------|-------------------|---------|---------|---------|------------|---------|----------------------------|--------|
|                                              | age group (years) |         |         |         |            |         | age group (years) |         |         |         |            |         | age group (years) |         |         |         |            |         | estd. no. (00)             | sample |
|                                              | 0 - 14            | 15 - 29 | 30 - 44 | 45 - 59 | 60 & above | all     | 0 - 14            | 15 - 29 | 30 - 44 | 45 - 59 | 60 & above | all     | 0 - 14            | 15 - 29 | 30 - 44 | 45 - 59 | 60 & above | all     |                            |        |
| (1)                                          | (2)               | (3)     | (4)     | (5)     | (6)        | (7)     | (8)               | (9)     | (10)    | (11)    | (12)       | (13)    | (14)              | (15)    | (16)    | (17)    | (18)       | (19)    | (20)                       | (21)   |
| Tamil Nadu                                   | 77                | 32      | 61      | 138     | 303        | 87      | 77                | 54      | 85      | 142     | 346        | 106     | 77                | 43      | 73      | 140     | 326        | 96      | 20654                      | 1255   |
| Tripura                                      | 85                | 18      | 83      | 67      | 292        | 72      | 61                | 46      | 88      | 77      | 170        | 71      | 75                | 33      | 85      | 72      | 229        | 72      | 305                        | 93     |
| Uttaranchal                                  | 93                | 18      | 19      | 40      | 336        | 65      | 40                | 35      | 67      | 111     | 155        | 65      | 73                | 27      | 42      | 77      | 235        | 65      | 1103                       | 104    |
| Uttar Pradesh                                | 88                | 53      | 69      | 149     | 298        | 93      | 81                | 77      | 138     | 238     | 371        | 126     | 85                | 64      | 103     | 189     | 335        | 108     | 36455                      | 1824   |
| West Bengal                                  | 137               | 61      | 88      | 139     | 479        | 137     | 114               | 90      | 154     | 249     | 542        | 178     | 126               | 76      | 118     | 191     | 509        | 157     | 28999                      | 1336   |
| A & N Islands                                | 12                | 98      | 11      | 138     | 336        | 58      | 55                | 59      | 63      | 50      | 143        | 61      | 34                | 78      | 31      | 99      | 249        | 59      | 61                         | 39     |
| Chandigarh                                   | 49                | 37      | 30      | 89      | 179        | 55      | 64                | 101     | 59      | 62      | 330        | 89      | 56                | 64      | 43      | 77      | 247        | 71      | 452                        | 145    |
| Dadra & N. Haveli                            | 44                | 9       | 0       | 0       | 9          | 18      | 89                | 0       | 0       | 0       | 86         | 34      | 62                | 6       | 0       | 0       | 45         | 24      | 7                          | 7      |
| Daman & Diu                                  | 12                | 0       | 0       | 165     | 201        | 30      | 13                | 52      | 69      | 0       | 55         | 41      | 13                | 19      | 37      | 90      | 111        | 35      | 13                         | 15     |
| Lakshadweep                                  | 94                | 22      | 93      | 218     | 474        | 112     | 141               | 108     | 105     | 252     | 582        | 168     | 116               | 66      | 99      | 234     | 533        | 140     | 40                         | 74     |
| Pondicherry                                  | 159               | 59      | 58      | 232     | 579        | 149     | 168               | 77      | 96      | 402     | 680        | 225     | 163               | 68      | 75      | 313     | 641        | 186     | 1175                       | 169    |
| ONES                                         | 59                | 12      | 24      | 21      | 143        | 37      | 61                | 27      | 38      | 61      | 131        | 48      | 60                | 20      | 31      | 40      | 137        | 42      | 830                        | 442    |
| GUTs                                         | 99                | 46      | 39      | 151     | 384        | 94      | 111               | 85      | 75      | 206     | 545        | 148     | 105               | 64      | 55      | 177     | 473        | 119     | 1748                       | 449    |
| all-India                                    | 84                | 44      | 64      | 127     | 352        | 91      | 74                | 56      | 95      | 173     | 383        | 108     | 79                | 50      | 79      | 149     | 368        | 99      | 242677                     | 13601  |
| estd. no. of persons reporting ailment* (00) | 32106             | 16745   | 17448   | 21321   | 28366      | 115986  | 25005             | 18704   | 24598   | 26164   | 32220      | 126691  | 57111             | 35450   | 42046   | 47484   | 60586      | 242677  | X                          | X      |
| sample persons reporting ailment*            | 1602              | 765     | 869     | 1118    | 2100       | 6454    | 1273              | 973     | 1148    | 1422    | 2331       | 7147    | 2875              | 1738    | 2017    | 2540    | 4431       | 13601   | X                          | X      |
| estd. no. of persons (00)                    | 380698            | 376633  | 271398  | 167236  | 80686      | 1276650 | 339616            | 335668  | 259117  | 151140  | 84109      | 1169650 | 720314            | 712301  | 530515  | 318376  | 164795     | 2446300 | X                          | X      |
| sample persons                               | 20212             | 19004   | 14366   | 8134    | 6354       | 68070   | 18332             | 18629   | 12974   | 8625    | 6447       | 65007   | 38544             | 37633   | 27340   | 16759   | 12801      | 133077  | X                          | X      |

\*during the last 15 days

Table (35): Number per 1000 of persons reporting ailment during the last 15 days by sex and age-group for each State/UT

## Rural+Urban

| state / ut        | male              |         |         |         |            |     | female            |         |         |         |            |      | person            |         |         |         |            |      | persons reporting ailment* |        |
|-------------------|-------------------|---------|---------|---------|------------|-----|-------------------|---------|---------|---------|------------|------|-------------------|---------|---------|---------|------------|------|----------------------------|--------|
|                   | age group (years) |         |         |         |            |     | age group (years) |         |         |         |            |      | age group (years) |         |         |         |            |      |                            |        |
|                   | 0 - 14            | 15 - 29 | 30 - 44 | 45 - 59 | 60 & above | all | 0 - 14            | 15 - 29 | 30 - 44 | 45 - 59 | 60 & above | all  | 0 - 14            | 15 - 29 | 30 - 44 | 45 - 59 | 60 & above | all  | estd. no. (00)             | sample |
| (1)               | (2)               | (3)     | (4)     | (5)     | (6)        | (7) | (8)               | (9)     | (10)    | (11)    | (12)       | (13) | (14)              | (15)    | (16)    | (17)    | (18)       | (19) | (20)                       | (21)   |
| Andhra Pradesh    | 76                | 32      | 72      | 128     | 381        | 91  | 69                | 47      | 77      | 158     | 417        | 102  | 73                | 39      | 75      | 143     | 400        | 96   | 69299                      | 2771   |
| Arunachal Pradesh | 57                | 49      | 34      | 42      | 239        | 59  | 53                | 58      | 34      | 74      | 214        | 61   | 55                | 54      | 34      | 57      | 227        | 60   | 532                        | 315    |
| Assam             | 94                | 34      | 37      | 65      | 366        | 78  | 97                | 43      | 55      | 97      | 398        | 87   | 95                | 38      | 45      | 80      | 380        | 82   | 19535                      | 1069   |
| Bihar             | 59                | 24      | 23      | 68      | 188        | 54  | 62                | 24      | 40      | 63      | 166        | 54   | 60                | 24      | 31      | 65      | 178        | 54   | 37351                      | 1344   |
| Chhattisgarh      | 61                | 46      | 65      | 96      | 168        | 68  | 58                | 47      | 79      | 99      | 152        | 71   | 60                | 46      | 72      | 97      | 159        | 70   | 14094                      | 615    |
| Delhi             | 9                 | 10      | 4       | 11      | 117        | 13  | 7                 | 7       | 13      | 15      | 134        | 15   | 8                 | 9       | 9       | 13      | 126        | 14   | 1644                       | 114    |
| Goa               | 134               | 29      | 93      | 91      | 498        | 117 | 69                | 26      | 93      | 164     | 558        | 131  | 100               | 28      | 93      | 125     | 531        | 124  | 2076                       | 90     |
| Gujarat           | 65                | 29      | 51      | 73      | 365        | 72  | 51                | 38      | 60      | 110     | 259        | 71   | 58                | 33      | 56      | 91      | 311        | 72   | 33665                      | 1237   |
| Haryana           | 64                | 68      | 72      | 121     | 259        | 86  | 57                | 88      | 126     | 138     | 223        | 102  | 61                | 77      | 98      | 129     | 241        | 93   | 17937                      | 785    |
| Himachal Pradesh  | 44                | 29      | 45      | 106     | 289        | 70  | 40                | 42      | 144     | 169     | 264        | 99   | 42                | 35      | 95      | 139     | 276        | 84   | 4951                       | 743    |
| Jammu & Kashmir   | 71                | 21      | 32      | 90      | 345        | 71  | 54                | 27      | 69      | 106     | 345        | 72   | 63                | 24      | 51      | 97      | 345        | 71   | 5219                       | 517    |
| Jharkhand         | 33                | 12      | 9       | 21      | 115        | 27  | 44                | 37      | 32      | 78      | 79         | 45   | 38                | 23      | 20      | 49      | 100        | 36   | 8366                       | 401    |
| Karnataka         | 43                | 22      | 36      | 85      | 319        | 60  | 43                | 23      | 49      | 101     | 286        | 63   | 43                | 22      | 43      | 93      | 303        | 62   | 28676                      | 1302   |
| Kerala            | 229               | 119     | 177     | 317     | 554        | 240 | 189               | 154     | 203     | 382     | 583        | 261  | 210               | 138     | 191     | 350     | 570        | 251  | 79308                      | 3218   |
| Madhya Pradesh    | 54                | 33      | 47      | 51      | 230        | 58  | 43                | 45      | 77      | 102     | 212        | 67   | 49                | 39      | 61      | 75      | 221        | 62   | 37320                      | 1409   |
| Maharashtra       | 93                | 45      | 60      | 127     | 344        | 97  | 82                | 60      | 97      | 149     | 349        | 110  | 88                | 52      | 78      | 138     | 346        | 103  | 97133                      | 3116   |
| Manipur           | 41                | 11      | 17      | 17      | 61         | 25  | 38                | 13      | 33      | 31      | 87         | 31   | 39                | 12      | 25      | 23      | 72         | 28   | 562                        | 237    |
| Meghalaya         | 69                | 26      | 23      | 10      | 156        | 48  | 53                | 30      | 32      | 127     | 173        | 54   | 61                | 28      | 27      | 66      | 164        | 51   | 1111                       | 214    |
| Mizoram           | 26                | 14      | 3       | 9       | 98         | 20  | 28                | 4       | 11      | 4       | 112        | 18   | 27                | 9       | 7       | 7       | 104        | 19   | 129                        | 124    |
| Nagaland          | 109               | 9       | 0       | 23      | 252        | 60  | 79                | 63      | 9       | 69      | 123        | 57   | 95                | 36      | 5       | 45      | 225        | 58   | 382                        | 108    |
| Orissa            | 84                | 43      | 61      | 83      | 161        | 76  | 72                | 45      | 68      | 89      | 163        | 73   | 78                | 44      | 65      | 86      | 162        | 75   | 25592                      | 938    |
| Punjab            | 91                | 71      | 96      | 144     | 299        | 109 | 76                | 81      | 174     | 261     | 397        | 146  | 84                | 76      | 134     | 198     | 346        | 127  | 29297                      | 1055   |
| Rajasthan         | 49                | 28      | 49      | 83      | 187        | 56  | 39                | 46      | 89      | 93      | 158        | 64   | 44                | 37      | 69      | 88      | 172        | 60   | 30437                      | 1441   |
| Sikkim            | 73                | 33      | 33      | 90      | 181        | 61  | 43                | 3       | 45      | 20      | 207        | 37   | 58                | 18      | 39      | 61      | 193        | 49   | 220                        | 137    |

Continued



Table (35): Number per 1000 of persons reporting ailment during the last 15 days by sex and age-group for each State/UT

## Rural+Urban

| state / ut                                   | male              |         |         |         |            |         | female            |         |         |         |            |         | person            |         |         |         |            |         | persons reporting ailment* |        |
|----------------------------------------------|-------------------|---------|---------|---------|------------|---------|-------------------|---------|---------|---------|------------|---------|-------------------|---------|---------|---------|------------|---------|----------------------------|--------|
|                                              | age group (years) |         |         |         |            |         | age group (years) |         |         |         |            |         | age group (years) |         |         |         |            |         | estd. no. (00)             | sample |
|                                              | 0 - 14            | 15 - 29 | 30 - 44 | 45 - 59 | 60 & above | all     | 0 - 14            | 15 - 29 | 30 - 44 | 45 - 59 | 60 & above | all     | 0 - 14            | 15 - 29 | 30 - 44 | 45 - 59 | 60 & above | all     |                            |        |
| (1)                                          | (2)               | (3)     | (4)     | (5)     | (6)        | (7)     | (8)               | (9)     | (10)    | (11)    | (12)       | (13)    | (14)              | (15)    | (16)    | (17)    | (18)       | (19)    | (20)                       | (21)   |
| Tamil Nadu                                   | 71                | 30      | 58      | 138     | 292        | 86      | 63                | 54      | 114     | 129     | 314        | 104     | 68                | 43      | 87      | 133     | 303        | 95      | 58235                      | 2357   |
| Tripura                                      | 174               | 63      | 85      | 98      | 267        | 118     | 137               | 82      | 119     | 144     | 304        | 126     | 158               | 72      | 101     | 122     | 283        | 122     | 3712                       | 594    |
| Uttaranchal                                  | 66                | 34      | 13      | 39      | 195        | 57      | 25                | 46      | 79      | 42      | 140        | 53      | 49                | 40      | 46      | 41      | 169        | 55      | 4397                       | 224    |
| Uttar Pradesh                                | 87                | 55      | 83      | 127     | 288        | 95      | 74                | 80      | 122     | 179     | 286        | 109     | 81                | 67      | 103     | 151     | 287        | 102     | 165152                     | 6192   |
| West Bengal                                  | 115               | 56      | 96      | 155     | 396        | 120     | 101               | 68      | 115     | 181     | 422        | 128     | 108               | 62      | 105     | 168     | 409        | 124     | 95799                      | 3175   |
| A & N Islands                                | 11                | 31      | 35      | 82      | 304        | 46      | 90                | 36      | 33      | 76      | 176        | 62      | 46                | 33      | 34      | 80      | 255        | 53      | 177                        | 75     |
| Chandigarh                                   | 44                | 32      | 31      | 83      | 191        | 51      | 75                | 96      | 60      | 62      | 330        | 89      | 59                | 59      | 44      | 73      | 253        | 68      | 499                        | 185    |
| Dadra & N. Haveli                            | 20                | 6       | 12      | 0       | 13         | 11      | 28                | 23      | 0       | 22      | 94         | 22      | 24                | 14      | 6       | 10      | 40         | 16      | 41                         | 20     |
| Daman & Diu                                  | 27                | 2       | 0       | 90      | 142        | 12      | 26                | 32      | 38      | 127     | 101        | 42      | 27                | 12      | 12      | 107     | 114        | 23      | 32                         | 29     |
| Lakshadweep                                  | 83                | 34      | 70      | 164     | 430        | 98      | 107               | 91      | 85      | 307     | 598        | 156     | 95                | 64      | 77      | 231     | 522        | 127     | 67                         | 132    |
| Pondicherry                                  | 173               | 84      | 67      | 181     | 559        | 154     | 148               | 53      | 95      | 298     | 692        | 194     | 162               | 69      | 80      | 240     | 636        | 173     | 1665                       | 227    |
| ONES                                         | 92                | 36      | 40      | 48      | 187        | 66      | 70                | 45      | 56      | 90      | 202        | 68      | 81                | 40      | 48      | 69      | 194        | 67      | 6647                       | 1729   |
| GUTs                                         | 88                | 43      | 43      | 113     | 367        | 83      | 96                | 60      | 65      | 165     | 529        | 121     | 92                | 51      | 53      | 138     | 449        | 101     | 2481                       | 668    |
| all-India                                    | 78                | 42      | 64      | 113     | 301        | 85      | 69                | 56      | 93      | 143     | 307        | 97      | 74                | 49      | 78      | 128     | 304        | 91      | 874611                     | 36510  |
| estd. no. of persons reporting ailment* (00) | 136342            | 53715   | 61345   | 66892   | 102729     | 421022  | 110026            | 69809   | 88428   | 81530   | 103796     | 453589  | 246368            | 123524  | 149773  | 148422  | 206524     | 874611  | X                          | X      |
| sample persons reporting ailment*            | 4853              | 2164    | 2405    | 2806    | 5513       | 17741   | 3849              | 2700    | 3231    | 3538    | 5451       | 18769   | 8702              | 4864    | 5636    | 6344    | 10964      | 36510   | X                          | X      |
| estd. no. of persons (00)                    | 1753735           | 1285112 | 962321  | 591642  | 341349     | 4934159 | 1596113           | 1236469 | 948278  | 571748  | 338233     | 4690841 | 3349848           | 2521581 | 1910599 | 1163390 | 679582     | 9625001 | X                          | X      |
| sample persons                               | 66155             | 52020   | 37833   | 22503   | 18188      | 196699  | 60005             | 50989   | 35870   | 24111   | 17381      | 188356  | 126160            | 103009  | 73703   | 46614   | 35569      | 385055  | X                          | X      |

\*during the last 15 days

Table (36): Number per 1000 of persons reporting ailment during the last 15 days by mpce class and social group for each sex and State/UT

| Rural             |        |            |           |           |           |           |           |           |           |           |           |           |       |      |              |      |      |        |                            |        |
|-------------------|--------|------------|-----------|-----------|-----------|-----------|-----------|-----------|-----------|-----------|-----------|-----------|-------|------|--------------|------|------|--------|----------------------------|--------|
| state / ut        | sex    | mpce class |           |           |           |           |           |           |           |           |           |           |       |      | social group |      |      |        | persons reporting ailment* |        |
|                   |        | 0 – 225    | 225 – 255 | 255 – 300 | 300 – 340 | 340 – 380 | 380 – 420 | 420 – 470 | 470 – 525 | 525 – 615 | 615 – 775 | 775 – 950 | 950 + | all  | ST           | SC   | OBC  | others | estd. no. (00)             | sample |
| (1)               | (2)    | (3)        | (4)       | (5)       | (6)       | (7)       | (8)       | (9)       | (10)      | (11)      | (12)      | (13)      | (14)  | (15) | (16)         | (17) | (18) | (19)   | (20)                       | (21)   |
| Andhra Pradesh    | male   | 74         | 50        | 77        | 78        | 84        | 63        | 73        | 100       | 80        | 103       | 200       | 123   | 86   | 66           | 86   | 77   | 115    | 22346                      | 815    |
|                   | female | 46         | 50        | 75        | 98        | 80        | 76        | 90        | 116       | 91        | 94        | 121       | 231   | 93   | 73           | 78   | 92   | 120    | 24380                      | 804    |
| Arunachal Pradesh | person | 59         | 50        | 76        | 87        | 82        | 70        | 82        | 108       | 85        | 99        | 158       | 173   | 90   | 70           | 82   | 84   | 118    | 46725                      | 1619   |
|                   | male   | 73         | 0         | 0         | 88        | 27        | 64        | 97        | 102       | 47        | 48        | 65        | 46    | 61   | 71           | 271  | 0    | 22     | 248                        | 124    |
| Assam             | female | 93         | 191       | 59        | 77        | 39        | 24        | 25        | 30        | 76        | 51        | 94        | 60    | 61   | 69           | 141  | 20   | 31     | 232                        | 118    |
|                   | person | 83         | 102       | 26        | 82        | 33        | 44        | 62        | 68        | 61        | 49        | 77        | 53    | 61   | 70           | 220  | 10   | 26     | 480                        | 242    |
| Bihar             | male   | 119        | 59        | 139       | 72        | 65        | 91        | 95        | 62        | 55        | 74        | 88        | 75    | 78   | 68           | 65   | 89   | 80     | 8998                       | 451    |
|                   | female | 196        | 31        | 127       | 71        | 110       | 88        | 82        | 74        | 72        | 76        | 51        | 151   | 86   | 66           | 86   | 84   | 93     | 8669                       | 433    |
| Chhattisgarh      | person | 158        | 43        | 133       | 72        | 87        | 89        | 89        | 67        | 63        | 75        | 71        | 110   | 82   | 67           | 75   | 87   | 86     | 17667                      | 884    |
|                   | male   | 40         | 31        | 43        | 37        | 61        | 65        | 51        | 58        | 90        | 56        | 89        | 65    | 53   | 53           | 55   | 55   | 44     | 16897                      | 565    |
| Delhi             | female | 24         | 19        | 35        | 49        | 52        | 63        | 79        | 90        | 63        | 69        | 78        | 79    | 53   | 53           | 52   | 54   | 53     | 15823                      | 536    |
|                   | person | 32         | 25        | 40        | 43        | 57        | 64        | 64        | 73        | 78        | 62        | 84        | 71    | 53   | 53           | 53   | 54   | 48     | 32720                      | 1101   |
| Goa               | male   | 98         | 55        | 69        | 49        | 57        | 63        | 90        | 65        | 73        | 103       | 0         | 5     | 69   | 58           | 95   | 73   | 36     | 5978                       | 222    |
|                   | female | 69         | 67        | 64        | 38        | 64        | 69        | 93        | 157       | 61        | 214       | 81        | 5     | 70   | 44           | 100  | 87   | 47     | 6080                       | 223    |
| Goa               | person | 83         | 61        | 67        | 44        | 61        | 66        | 92        | 110       | 67        | 153       | 37        | 5     | 69   | 51           | 97   | 80   | 41     | 12059                      | 445    |
|                   | male   | 0          | 0         | 0         | 0         | 0         | 0         | 0         | 0         | 0         | 16        | 0         | 0     | 4    | 0            | 0    | 5    | 0      | 34                         | 1      |
| Goa               | female | 0          | 0         | 0         | 0         | 0         | 0         | 0         | 0         | 0         | 0         | 21        | 3     | 4    | 0            | 0    | 3    | 6      | 35                         | 2      |
|                   | person | 0          | 0         | 0         | 0         | 0         | 0         | 0         | 0         | 0         | 8         | 10        | 2     | 4    | 0            | 0    | 4    | 3      | 69                         | 3      |
| Goa               | male   | 0          | 0         | 0         | 0         | 0         | 0         | 0         | 114       | 102       | 11        | 194       | 213   | 137  | 823          | 0    | 422  | 120    | 765                        | 17     |
|                   | female | 0          | 0         | 0         | 0         | 0         | 0         | 107       | 81        | 240       | 98        | 16        | 174   | 138  | 478          | 0    | 422  | 125    | 779                        | 22     |
| Goa               | person | 0          | 0         | 0         | 0         | 0         | 0         | 63        | 100       | 192       | 50        | 117       | 192   | 138  | 625          | 0    | 422  | 123    | 1544                       | 39     |

Continued

Table (36): Number per 1000 of persons reporting ailment during the last 15 days by mpce class and social group for each sex and State/UT

Rural

| state / ut       | sex    | mpce class |           |           |           |           |           |           |           |           |           |           |       |      | social group |      |      |        | persons reporting ailment* |        |
|------------------|--------|------------|-----------|-----------|-----------|-----------|-----------|-----------|-----------|-----------|-----------|-----------|-------|------|--------------|------|------|--------|----------------------------|--------|
|                  |        | 0 – 225    | 225 – 255 | 255 – 300 | 300 – 340 | 340 – 380 | 380 – 420 | 420 – 470 | 470 – 525 | 525 – 615 | 615 – 775 | 775 – 950 | 950 + | all  | ST           | SC   | OBC  | others | estd. no. (00)             | sample |
| (1)              | (2)    | (3)        | (4)       | (5)       | (6)       | (7)       | (8)       | (9)       | (10)      | (11)      | (12)      | (13)      | (14)  | (15) | (16)         | (17) | (18) | (19)   | (20)                       | (21)   |
| Gujarat          | male   | 23         | 3         | 46        | 34        | 68        | 88        | 69        | 65        | 76        | 82        | 78        | 91    | 70   | 51           | 90   | 69   | 76     | 10922                      | 335    |
|                  | female | 38         | 25        | 38        | 57        | 61        | 68        | 86        | 51        | 50        | 93        | 101       | 77    | 68   | 61           | 67   | 56   | 91     | 10408                      | 297    |
|                  | person | 30         | 13        | 42        | 45        | 64        | 77        | 77        | 58        | 64        | 87        | 90        | 84    | 69   | 56           | 79   | 63   | 84     | 21330                      | 632    |
| Haryana          | male   | 109        | 21        | 87        | 41        | 114       | 26        | 70        | 57        | 76        | 128       | 82        | 91    | 86   | 0            | 105  | 97   | 68     | 6693                       | 271    |
|                  | female | 0          | 215       | 47        | 94        | 111       | 119       | 70        | 47        | 72        | 115       | 137       | 167   | 106  | 0            | 102  | 103  | 111    | 7042                       | 237    |
|                  | person | 46         | 92        | 64        | 64        | 112       | 64        | 70        | 52        | 74        | 122       | 107       | 124   | 95   | 0            | 104  | 100  | 88     | 13735                      | 508    |
| Himachal Pradesh | male   | 0          | 16        | 88        | 56        | 32        | 61        | 88        | 70        | 59        | 88        | 90        | 74    | 73   | 87           | 66   | 87   | 71     | 1897                       | 284    |
|                  | female | 114        | 69        | 53        | 102       | 74        | 63        | 59        | 64        | 65        | 115       | 148       | 198   | 101  | 53           | 91   | 129  | 102    | 2713                       | 371    |
|                  | person | 45         | 40        | 68        | 79        | 53        | 62        | 73        | 67        | 62        | 101       | 119       | 134   | 87   | 69           | 79   | 110  | 86     | 4610                       | 655    |
| Jammu & Kashmir  | male   | 119        | 0         | 0         | 52        | 48        | 40        | 49        | 89        | 112       | 55        | 55        | 68    | 70   | 94           | 83   | 85   | 62     | 2159                       | 174    |
|                  | female | 0          | 0         | 129       | 1         | 140       | 22        | 50        | 60        | 60        | 85        | 71        | 92    | 69   | 0            | 95   | 34   | 70     | 1998                       | 177    |
|                  | person | 90         | 0         | 73        | 29        | 96        | 31        | 50        | 74        | 89        | 69        | 62        | 81    | 70   | 47           | 89   | 61   | 66     | 4157                       | 351    |
| Jharkhand        | male   | 26         | 18        | 22        | 28        | 14        | 27        | 25        | 31        | 10        | 42        | 27        | 78    | 24   | 21           | 16   | 23   | 45     | 2448                       | 112    |
|                  | female | 15         | 26        | 41        | 40        | 33        | 47        | 54        | 90        | 47        | 29        | 21        | 66    | 43   | 41           | 20   | 50   | 48     | 3950                       | 137    |
|                  | person | 20         | 22        | 31        | 33        | 23        | 37        | 38        | 60        | 28        | 36        | 24        | 72    | 33   | 30           | 18   | 36   | 46     | 6398                       | 249    |
| Karnataka        | male   | 31         | 57        | 38        | 43        | 95        | 67        | 62        | 67        | 61        | 58        | 65        | 146   | 63   | 50           | 65   | 72   | 58     | 10368                      | 373    |
|                  | female | 27         | 73        | 48        | 50        | 64        | 61        | 68        | 80        | 68        | 63        | 44        | 163   | 64   | 70           | 54   | 66   | 66     | 10550                      | 334    |
|                  | person | 29         | 66        | 43        | 46        | 80        | 64        | 65        | 73        | 64        | 60        | 54        | 154   | 64   | 60           | 60   | 69   | 62     | 20918                      | 707    |
| Kerala           | male   | 390        | 133       | 276       | 290       | 161       | 250       | 168       | 219       | 247       | 245       | 273       | 266   | 242  | 221          | 245  | 242  | 242    | 26935                      | 966    |
|                  | female | 229        | 266       | 190       | 217       | 237       | 214       | 158       | 289       | 239       | 257       | 316       | 335   | 266  | 304          | 299  | 258  | 268    | 32726                      | 1189   |
|                  | person | 304        | 202       | 228       | 252       | 203       | 231       | 163       | 257       | 243       | 251       | 296       | 302   | 255  | 264          | 272  | 250  | 255    | 59661                      | 2155   |

Continued

Table (36): Number per 1000 of persons reporting ailment during the last 15 days by mpce class and social group for each sex and State/UT

Rural

| state / ut     | sex    | mpce class |           |           |           |           |           |           |           |           |           |           |       |      | social group |      |      |        | persons reporting ailment* |        |
|----------------|--------|------------|-----------|-----------|-----------|-----------|-----------|-----------|-----------|-----------|-----------|-----------|-------|------|--------------|------|------|--------|----------------------------|--------|
|                |        | 0 – 225    | 225 – 255 | 255 – 300 | 300 – 340 | 340 – 380 | 380 – 420 | 420 – 470 | 470 – 525 | 525 – 615 | 615 – 775 | 775 – 950 | 950 + | all  | ST           | SC   | OBC  | others | estd. no. (00)             | sample |
| (1)            | (2)    | (3)        | (4)       | (5)       | (6)       | (7)       | (8)       | (9)       | (10)      | (11)      | (12)      | (13)      | (14)  | (15) | (16)         | (17) | (18) | (19)   | (20)                       | (21)   |
| Madhya Pradesh | male   | 52         | 56        | 45        | 56        | 52        | 45        | 62        | 62        | 46        | 108       | 65        | 126   | 57   | 43           | 66   | 60   | 60     | 13403                      | 425    |
|                | female | 58         | 41        | 73        | 45        | 63        | 69        | 59        | 64        | 78        | 113       | 107       | 139   | 66   | 70           | 54   | 66   | 74     | 14328                      | 423    |
|                | person | 55         | 49        | 59        | 51        | 58        | 57        | 60        | 63        | 60        | 110       | 84        | 133   | 61   | 56           | 60   | 63   | 66     | 27731                      | 848    |
| Maharashtra    | male   | 77         | 92        | 46        | 49        | 57        | 87        | 81        | 89        | 90        | 115       | 110       | 140   | 84   | 53           | 58   | 86   | 105    | 23624                      | 685    |
|                | female | 64         | 67        | 70        | 70        | 74        | 87        | 94        | 104       | 121       | 120       | 192       | 222   | 103  | 99           | 84   | 111  | 103    | 28651                      | 764    |
|                | person | 70         | 79        | 57        | 60        | 65        | 87        | 88        | 96        | 106       | 117       | 150       | 180   | 93   | 76           | 71   | 99   | 104    | 52275                      | 1449   |
| Manipur        | male   | 0          | 0         | 0         | 50        | 4         | 19        | 12        | 8         | 12        | 56        | 53        | 19    | 27   | 7            | 0    | 44   | 0      | 196                        | 73     |
|                | female | 0          | 0         | 0         | 0         | 32        | 8         | 4         | 20        | 4         | 58        | 92        | 38    | 30   | 6            | 0    | 52   | 0      | 215                        | 85     |
|                | person | 0          | 0         | 0         | 23        | 17        | 13        | 8         | 13        | 8         | 57        | 72        | 28    | 28   | 6            | 0    | 48   | 0      | 411                        | 158    |
| Meghalaya      | male   | 250        | 0         | 180       | 0         | 85        | 18        | 45        | 31        | 40        | 88        | 68        | 85    | 51   | 54           | 0    | 0    | 42     | 502                        | 76     |
|                | female | 0          | 0         | 42        | 29        | 45        | 12        | 62        | 52        | 30        | 40        | 171       | 146   | 51   | 53           | 0    | 8    | 40     | 468                        | 78     |
|                | person | 111        | 0         | 110       | 14        | 64        | 15        | 53        | 42        | 35        | 64        | 115       | 115   | 51   | 54           | 0    | 4    | 41     | 970                        | 154    |
| Mizoram        | male   | 0          | 0         | 0         | 18        | 0         | 0         | 0         | 85        | 36        | 32        | 10        | 12    | 23   | 23           | 0    | 0    | 0      | 46                         | 21     |
|                | female | 0          | 0         | 0         | 0         | 0         | 0         | 0         | 0         | 39        | 32        | 0         | 18    | 18   | 18           | 0    | 0    | 0      | 33                         | 13     |
|                | person | 0          | 0         | 0         | 10        | 0         | 0         | 0         | 36        | 38        | 32        | 5         | 15    | 20   | 21           | 0    | 0    | 0      | 80                         | 34     |
| Nagaland       | male   | 0          | 0         | 0         | 0         | 0         | 0         | 19        | 0         | 0         | 71        | 48        | 96    | 61   | 57           | 500  | 0    | 0      | 129                        | 41     |
|                | female | 0          | 0         | 0         | 0         | 0         | 0         | 0         | 0         | 0         | 44        | 85        | 80    | 63   | 64           | 0    | 0    | 0      | 128                        | 33     |
|                | person | 0          | 0         | 0         | 0         | 0         | 0         | 14        | 0         | 0         | 60        | 67        | 88    | 62   | 60           | 333  | 0    | 0      | 257                        | 74     |
| Orissa         | male   | 61         | 98        | 63        | 65        | 55        | 108       | 84        | 96        | 88        | 150       | 86        | 199   | 79   | 70           | 87   | 79   | 81     | 11747                      | 388    |
|                | female | 76         | 88        | 66        | 66        | 79        | 67        | 79        | 51        | 87        | 107       | 188       | 148   | 76   | 60           | 115  | 64   | 86     | 11651                      | 373    |
|                | person | 69         | 93        | 64        | 66        | 67        | 88        | 82        | 73        | 88        | 128       | 136       | 175   | 77   | 65           | 101  | 72   | 83     | 23398                      | 761    |

Continued

Table (36): Number per 1000 of persons reporting ailment during the last 15 days by mpce class and social group for each sex and State/UT

Rural

| state / ut    | sex    | mpce class |           |           |           |           |           |           |           |           |           |           |       |      | social group |      |      |        | persons reporting ailment* |        |
|---------------|--------|------------|-----------|-----------|-----------|-----------|-----------|-----------|-----------|-----------|-----------|-----------|-------|------|--------------|------|------|--------|----------------------------|--------|
|               |        | 0 – 225    | 225 – 255 | 255 – 300 | 300 – 340 | 340 – 380 | 380 – 420 | 420 – 470 | 470 – 525 | 525 – 615 | 615 – 775 | 775 – 950 | 950 + | all  | ST           | SC   | OBC  | others | estd. no. (00)             | sample |
| (1)           | (2)    | (3)        | (4)       | (5)       | (6)       | (7)       | (8)       | (9)       | (10)      | (11)      | (12)      | (13)      | (14)  | (15) | (16)         | (17) | (18) | (19)   | (20)                       | (21)   |
| Punjab        | male   | 225        | 0         | 21        | 47        | 140       | 46        | 108       | 89        | 28        | 95        | 186       | 155   | 114  | 0            | 119  | 100  | 115    | 9207                       | 293    |
|               | female | 62         | 0         | 51        | 91        | 242       | 73        | 78        | 129       | 162       | 175       | 153       | 228   | 160  | 0            | 157  | 123  | 177    | 11960                      | 354    |
|               | person | 143        | 0         | 38        | 70        | 187       | 60        | 94        | 108       | 89        | 134       | 170       | 190   | 136  | 0            | 138  | 110  | 144    | 21168                      | 647    |
| Rajasthan     | male   | 13         | 77        | 58        | 38        | 36        | 75        | 45        | 40        | 45        | 65        | 60        | 122   | 52   | 33           | 49   | 57   | 56     | 10886                      | 475    |
|               | female | 33         | 22        | 59        | 31        | 48        | 36        | 40        | 62        | 82        | 87        | 125       | 115   | 61   | 41           | 74   | 63   | 58     | 11962                      | 446    |
|               | person | 23         | 48        | 58        | 34        | 42        | 55        | 43        | 50        | 62        | 75        | 94        | 119   | 57   | 37           | 60   | 60   | 57     | 22848                      | 921    |
| Sikkim        | male   | 444        | 0         | 12        | 156       | 15        | 123       | 78        | 45        | 62        | 42        | 136       | 82    | 69   | 72           | 80   | 69   | 15     | 136                        | 69     |
|               | female | 0          | 0         | 6         | 35        | 17        | 161       | 85        | 31        | 28        | 5         | 11        | 0     | 40   | 61           | 15   | 28   | 77     | 76                         | 55     |
|               | person | 268        | 0         | 9         | 90        | 16        | 145       | 81        | 39        | 45        | 22        | 78        | 48    | 55   | 66           | 46   | 49   | 51     | 212                        | 124    |
| Tamil Nadu    | male   | 82         | 64        | 62        | 74        | 87        | 61        | 60        | 65        | 93        | 127       | 130       | 132   | 86   | 15           | 78   | 92   | 90     | 16812                      | 525    |
|               | female | 90         | 97        | 69        | 87        | 93        | 91        | 117       | 75        | 94        | 123       | 165       | 157   | 103  | 1            | 103  | 106  | 98     | 20770                      | 577    |
|               | person | 86         | 80        | 66        | 81        | 90        | 76        | 90        | 70        | 94        | 125       | 148       | 144   | 95   | 8            | 91   | 100  | 94     | 37581                      | 1102   |
| Tripura       | male   | 392        | 68        | 71        | 84        | 128       | 123       | 155       | 137       | 170       | 115       | 147       | 104   | 126  | 131          | 140  | 85   | 139    | 1754                       | 251    |
|               | female | 237        | 147       | 60        | 104       | 197       | 154       | 187       | 80        | 150       | 147       | 165       | 54    | 135  | 148          | 151  | 115  | 126    | 1654                       | 250    |
|               | person | 312        | 104       | 66        | 93        | 159       | 138       | 171       | 110       | 162       | 129       | 156       | 82    | 130  | 139          | 145  | 99   | 133    | 3407                       | 501    |
| Uttaranchal   | male   | 0          | 0         | 0         | 27        | 54        | 23        | 22        | 79        | 164       | 65        | 166       | 38    | 54   | 73           | 22   | 69   | 63     | 1815                       | 65     |
|               | female | 0          | 2         | 0         | 43        | 36        | 78        | 2         | 74        | 72        | 31        | 48        | 150   | 49   | 30           | 32   | 44   | 59     | 1479                       | 55     |
|               | person | 0          | 1         | 0         | 34        | 45        | 46        | 13        | 77        | 118       | 48        | 105       | 99    | 52   | 53           | 26   | 58   | 61     | 3293                       | 120    |
| Uttar Pradesh | male   | 69         | 63        | 76        | 96        | 87        | 93        | 104       | 116       | 102       | 106       | 121       | 147   | 96   | 18           | 92   | 89   | 120    | 63959                      | 2176   |
|               | female | 69         | 61        | 85        | 75        | 105       | 93        | 125       | 116       | 127       | 132       | 144       | 181   | 104  | 69           | 101  | 101  | 116    | 64737                      | 2192   |
|               | person | 69         | 62        | 81        | 85        | 96        | 93        | 115       | 116       | 114       | 118       | 132       | 163   | 100  | 43           | 96   | 95   | 118    | 128696                     | 4368   |

Continued

Table (36): Number per 1000 of persons reporting ailment during the last 15 days by mpce class and social group for each sex and State/UT

Rural

| state / ut        | sex    | mpce class |           |           |           |           |           |           |           |           |           |           |       |      | social group |      |      |        | persons reporting ailment* |        |
|-------------------|--------|------------|-----------|-----------|-----------|-----------|-----------|-----------|-----------|-----------|-----------|-----------|-------|------|--------------|------|------|--------|----------------------------|--------|
|                   |        | 0 – 225    | 225 – 255 | 255 – 300 | 300 – 340 | 340 – 380 | 380 – 420 | 420 – 470 | 470 – 525 | 525 – 615 | 615 – 775 | 775 – 950 | 950 + | all  | ST           | SC   | OBC  | others | estd. no. (00)             | sample |
| (1)               | (2)    | (3)        | (4)       | (5)       | (6)       | (7)       | (8)       | (9)       | (10)      | (11)      | (12)      | (13)      | (14)  | (15) | (16)         | (17) | (18) | (19)   | (20)                       | (21)   |
| West Bengal       | male   | 96         | 55        | 71        | 102       | 106       | 113       | 135       | 122       | 147       | 121       | 142       | 189   | 115  | 60           | 107  | 121  | 124    | 33754                      | 908    |
|                   | female | 76         | 57        | 67        | 105       | 99        | 106       | 123       | 121       | 129       | 139       | 225       | 204   | 113  | 53           | 112  | 125  | 120    | 33046                      | 931    |
|                   | person | 86         | 56        | 69        | 103       | 102       | 109       | 129       | 121       | 138       | 130       | 180       | 197   | 114  | 56           | 110  | 123  | 122    | 66800                      | 1839   |
| A & N Islands     | male   | 0          | 0         | 0         | 0         | 3         | 186       | 21        | 4         | 114       | 30        | 22        | 48    | 41   | 17           | 0    | 0    | 45     | 52                         | 23     |
|                   | female | 0          | 0         | 0         | 0         | 0         | 0         | 0         | 0         | 0         | 56        | 23        | 165   | 63   | 22           | 0    | 0    | 69     | 64                         | 13     |
|                   | person | 0          | 0         | 0         | 0         | 2         | 97        | 6         | 2         | 64        | 39        | 22        | 108   | 51   | 20           | 0    | 0    | 56     | 115                        | 36     |
| Chandigarh        | male   | 0          | 0         | 0         | 0         | 0         | 0         | 0         | 0         | 0         | 29        | 14        | 42    | 26   | 0            | 41   | 2    | 32     | 13                         | 19     |
|                   | female | 0          | 0         | 0         | 0         | 186       | 0         | 0         | 0         | 18        | 115       | 29        | 89    | 89   | 250          | 76   | 72   | 94     | 34                         | 21     |
|                   | person | 0          | 0         | 0         | 0         | 102       | 0         | 0         | 0         | 11        | 57        | 21        | 60    | 52   | 200          | 56   | 17   | 61     | 47                         | 40     |
| Dadra & N. Haveli | male   | 0          | 0         | 0         | 0         | 0         | 62        | 0         | 0         | 8         | 10        | 6         | 5     | 10   | 10           | 0    | 0    | 17     | 11                         | 7      |
|                   | female | 0          | 0         | 0         | 0         | 0         | 52        | 10        | 51        | 81        | 0         | 0         | 0     | 21   | 17           | 0    | 0    | 83     | 23                         | 6      |
|                   | person | 0          | 0         | 0         | 0         | 0         | 58        | 5         | 26        | 47        | 5         | 3         | 4     | 15   | 13           | 0    | 0    | 47     | 35                         | 13     |
| Daman & Diu       | male   | 0          | 0         | 0         | 0         | 0         | 0         | 0         | 0         | 39        | 1         | 4         | 2     | 6    | 0            | 0    | 25   | 0      | 4                          | 4      |
|                   | female | 0          | 0         | 0         | 0         | 0         | 0         | 0         | 0         | 26        | 79        | 84        | 26    | 43   | 0            | 0    | 102  | 0      | 14                         | 10     |
|                   | person | 0          | 0         | 0         | 0         | 0         | 0         | 0         | 0         | 34        | 20        | 48        | 9     | 19   | 0            | 0    | 62   | 0      | 18                         | 14     |
| Lakshadweep       | male   | 0          | 0         | 83        | 0         | 0         | 0         | 56        | 0         | 51        | 100       | 176       | 47    | 81   | 72           | 0    | 0    | 482    | 10                         | 19     |
|                   | female | 0          | 0         | 0         | 0         | 96        | 280       | 108       | 108       | 39        | 126       | 121       | 292   | 142  | 140          | 0    | 500  | 0      | 18                         | 39     |
|                   | person | 0          | 0         | 43        | 0         | 39        | 141       | 100       | 57        | 45        | 117       | 149       | 154   | 112  | 108          | 0    | 250  | 390    | 27                         | 58     |
| Pondicherry       | male   | 1000       | 0         | 334       | 0         | 218       | 133       | 406       | 188       | 66        | 181       | 88        | 107   | 162  | 0            | 180  | 147  | 267    | 289                        | 34     |
|                   | female | 0          | 0         | 515       | 19        | 45        | 250       | 102       | 0         | 266       | 112       | 59        | 92    | 132  | 0            | 117  | 141  | 0      | 201                        | 24     |
|                   | person | 1000       | 0         | 423       | 13        | 156       | 202       | 238       | 94        | 142       | 159       | 74        | 101   | 149  | 0            | 154  | 144  | 211    | 490                        | 58     |

1  
2  
3  
4  
5  
6  
7  
8  
9  
10  
11  
12  
13  
14  
15  
16  
17  
18  
19  
20  
21  
22  
23  
24  
25  
26  
27  
28  
29  
30  
31  
32  
33  
34  
35  
36  
37  
38  
39  
40  
41  
42  
43  
44  
45  
46  
47

Table (36): Number per 1000 of persons reporting ailment during the last 15 days by mpce class and social group for each sex and State/UT

Rural

| state / ut | sex    | mpce class |           |           |           |           |           |           |           |           |           |           |       |      |      | social group |      |        |                | persons reporting ailment* |  |
|------------|--------|------------|-----------|-----------|-----------|-----------|-----------|-----------|-----------|-----------|-----------|-----------|-------|------|------|--------------|------|--------|----------------|----------------------------|--|
|            |        | 0 – 225    | 225 – 255 | 255 – 300 | 300 – 340 | 340 – 380 | 380 – 420 | 420 – 470 | 470 – 525 | 525 – 615 | 615 – 775 | 775 – 950 | 950 + | all  | ST   | SC           | OBC  | others | estd. no. (00) | sample                     |  |
| (1)        | (2)    | (3)        | (4)       | (5)       | (6)       | (7)       | (8)       | (9)       | (10)      | (11)      | (12)      | (13)      | (14)  | (15) | (16) | (17)         | (18) | (19)   | (20)           | (21)                       |  |
| ONES       | male   | 181        | 56        | 66        | 73        | 95        | 87        | 85        | 66        | 54        | 76        | 64        | 67    | 73   | 60   | 140          | 60   | 107    | 3011           | 655                        |  |
|            | female | 132        | 152       | 56        | 79        | 124       | 99        | 100       | 48        | 40        | 65        | 94        | 66    | 73   | 61   | 143          | 67   | 101    | 2806           | 632                        |  |
|            | person | 157        | 101       | 61        | 76        | 108       | 93        | 92        | 57        | 47        | 71        | 78        | 66    | 73   | 60   | 141          | 63   | 104    | 5817           | 1287                       |  |
| GUTs       | male   | 504        | 0         | 114       | 0         | 121       | 111       | 208       | 58        | 56        | 47        | 33        | 47    | 69   | 17   | 165          | 109  | 35     | 378            | 106                        |  |
|            | female | 0          | 0         | 186       | 19        | 61        | 169       | 58        | 22        | 134       | 52        | 32        | 107   | 79   | 27   | 112          | 127  | 72     | 354            | 113                        |  |
|            | person | 337        | 0         | 148       | 13        | 95        | 140       | 126       | 40        | 90        | 49        | 32        | 71    | 73   | 22   | 143          | 117  | 49     | 733            | 219                        |  |
| All India  | male   | 65         | 57        | 61        | 65        | 72        | 79        | 80        | 88        | 88        | 106       | 123       | 142   | 83   | 52   | 83           | 82   | 98     | 305036         | 11287                      |  |
|            | female | 63         | 56        | 66        | 67        | 81        | 81        | 92        | 99        | 100       | 119       | 151       | 189   | 93   | 63   | 93           | 92   | 106    | 326898         | 11622                      |  |
|            | person | 64         | 56        | 64        | 66        | 77        | 80        | 86        | 93        | 94        | 112       | 137       | 165   | 88   | 58   | 88           | 87   | 102    | 631934         | 22909                      |  |

\* during the last 15 days

Table (36): Number per 1000 of persons reporting ailment during the last 15 days by mpce class and social group for each sex and State/UT

Urban

| state / ut        | sex    | mpce class |           |           |           |           |           |           |           |            |             |             |        |      | social group |      |      |        | persons reporting ailment* |        |
|-------------------|--------|------------|-----------|-----------|-----------|-----------|-----------|-----------|-----------|------------|-------------|-------------|--------|------|--------------|------|------|--------|----------------------------|--------|
|                   |        | 0 – 300    | 300 – 350 | 350 – 425 | 425 – 500 | 500 – 575 | 575 – 665 | 665 – 775 | 775 – 915 | 915 – 1120 | 1120 – 1500 | 1500 – 1925 | 1925 + | all  | ST           | SC   | OBC  | others | estd. no. (00)             | sample |
| (1)               | (2)    | (3)        | (4)       | (5)       | (6)       | (7)       | (8)       | (9)       | (10)      | (11)       | (12)        | (13)        | (14)   | (15) | (16)         | (17) | (18) | (19)   | (20)                       | (21)   |
| Andhra Pradesh    | male   | 87         | 85        | 89        | 107       | 70        | 117       | 82        | 80        | 77         | 125         | 107         | 148    | 102  | 70           | 84   | 99   | 114    | 10278                      | 499    |
|                   | female | 31         | 235       | 114       | 75        | 46        | 159       | 136       | 134       | 120        | 161         | 118         | 189    | 127  | 60           | 88   | 118  | 153    | 12295                      | 653    |
|                   | person | 63         | 157       | 101       | 90        | 57        | 137       | 109       | 106       | 99         | 142         | 113         | 166    | 114  | 66           | 86   | 108  | 133    | 22574                      | 1152   |
| Arunachal Pradesh | male   | 0          | 0         | 5         | 7         | 42        | 6         | 138       | 37        | 45         | 0           | 12          | 0      | 46   | 68           | 0    | 0    | 25     | 24                         | 35     |
|                   | female | 68         | 0         | 0         | 44        | 0         | 5         | 145       | 60        | 56         | 12          | 5           | 0      | 57   | 73           | 0    | 333  | 26     | 28                         | 38     |
|                   | person | 23         | 0         | 2         | 26        | 25        | 5         | 141       | 47        | 50         | 7           | 9           | 0      | 51   | 71           | 0    | 131  | 26     | 52                         | 73     |
| Assam             | male   | 8          | 13        | 334       | 45        | 125       | 91        | 152       | 60        | 68         | 31          | 56          | 48     | 72   | 19           | 113  | 93   | 67     | 862                        | 91     |
|                   | female | 0          | 23        | 310       | 86        | 16        | 136       | 148       | 67        | 67         | 136         | 27          | 53     | 95   | 51           | 118  | 89   | 96     | 1006                       | 94     |
|                   | person | 4          | 17        | 320       | 65        | 67        | 111       | 150       | 63        | 67         | 79          | 41          | 50     | 83   | 32           | 116  | 91   | 80     | 1868                       | 185    |
| Bihar             | male   | 51         | 120       | 69        | 58        | 23        | 40        | 17        | 65        | 108        | 161         | 22          | 30     | 63   | 10           | 66   | 53   | 83     | 2497                       | 126    |
|                   | female | 42         | 365       | 57        | 55        | 35        | 59        | 71        | 35        | 51         | 41          | 33          | 8      | 64   | 61           | 149  | 45   | 57     | 2134                       | 117    |
|                   | person | 48         | 250       | 63        | 56        | 28        | 48        | 40        | 50        | 81         | 103         | 25          | 20     | 63   | 22           | 107  | 50   | 70     | 4631                       | 243    |
| Chhattisgarh      | male   | 70         | 49        | 55        | 60        | 20        | 32        | 81        | 63        | 57         | 76          | 75          | 268    | 63   | 34           | 56   | 58   | 91     | 950                        | 81     |
|                   | female | 51         | 74        | 52        | 34        | 138       | 16        | 67        | 101       | 167        | 89          | 32          | 139    | 81   | 41           | 64   | 91   | 84     | 1085                       | 89     |
|                   | person | 60         | 58        | 54        | 46        | 83        | 25        | 75        | 79        | 109        | 82          | 55          | 208    | 72   | 37           | 60   | 73   | 88     | 2035                       | 170    |
| Delhi             | male   | 0          | 27        | 7         | 11        | 55        | 3         | 9         | 32        | 9          | 14          | 5           | 21     | 15   | 0            | 13   | 23   | 13     | 812                        | 58     |
|                   | female | 0          | 103       | 0         | 34        | 0         | 39        | 19        | 3         | 2          | 26          | 13          | 22     | 17   | 0            | 19   | 9    | 19     | 763                        | 53     |
|                   | person | 0          | 68        | 4         | 23        | 24        | 18        | 14        | 19        | 6          | 18          | 8           | 21     | 16   | 0            | 16   | 18   | 16     | 1575                       | 111    |
| Goa               | male   | 0          | 0         | 0         | 216       | 57        | 40        | 0         | 94        | 133        | 48          | 0           | 0      | 77   | 0            | 25   | 34   | 83     | 217                        | 23     |
|                   | female | 0          | 0         | 0         | 92        | 403       | 0         | 45        | 219       | 7          | 58          | 128         | 126    | 115  | 0            | 273  | 213  | 101    | 315                        | 28     |
|                   | person | 0          | 0         | 0         | 150       | 187       | 23        | 13        | 161       | 71         | 52          | 95          | 68     | 95   | 0            | 159  | 100  | 92     | 532                        | 51     |

Continued



Table (36): Number per 1000 of persons reporting ailment during the last 15 days by mpce class and social group for each sex and State/UT

Urban

| state / ut       | sex    | mpce class |         |         |         |         |         |         |         |          |           |           |       |      | social group |      |      |        | persons reporting ailment* |        |
|------------------|--------|------------|---------|---------|---------|---------|---------|---------|---------|----------|-----------|-----------|-------|------|--------------|------|------|--------|----------------------------|--------|
|                  |        | 0-300      | 300-350 | 350-425 | 425-500 | 500-575 | 575-665 | 665-775 | 775-915 | 915-1120 | 1120-1500 | 1500-1925 | 1925+ | all  | ST           | SC   | OBC  | others | estd. no. (00)             | sample |
| (1)              | (2)    | (3)        | (4)     | (5)     | (6)     | (7)     | (8)     | (9)     | (10)    | (11)     | (12)      | (13)      | (14)  | (15) | (16)         | (17) | (18) | (19)   | (20)                       | (21)   |
| Gujarat          | male   | 43         | 12      | 15      | 72      | 107     | 45      | 43      | 92      | 69       | 89        | 79        | 153   | 77   | 114          | 38   | 68   | 91     | 6535                       | 299    |
|                  | female | 0          | 5       | 8       | 74      | 130     | 109     | 72      | 74      | 75       | 65        | 78        | 126   | 78   | 95           | 77   | 73   | 83     | 5800                       | 306    |
|                  | person | 21         | 9       | 12      | 73      | 117     | 77      | 57      | 83      | 72       | 78        | 79        | 141   | 78   | 105          | 57   | 70   | 87     | 12335                      | 605    |
| Haryana          | male   | 178        | 0       | 56      | 18      | 87      | 82      | 22      | 76      | 103      | 144       | 97        | 193   | 86   | 332          | 71   | 98   | 82     | 2195                       | 139    |
|                  | female | 0          | 0       | 30      | 43      | 75      | 93      | 48      | 145     | 32       | 186       | 79        | 207   | 89   | 435          | 98   | 48   | 99     | 2007                       | 138    |
|                  | person | 146        | 0       | 44      | 30      | 82      | 87      | 35      | 109     | 72       | 163       | 89        | 200   | 87   | 396          | 84   | 76   | 90     | 4202                       | 277    |
| Himachal Pradesh | male   | 0          | 0       | 0       | 30      | 16      | 83      | 12      | 10      | 78       | 89        | 33        | 15    | 39   | 0            | 10   | 80   | 46     | 110                        | 38     |
|                  | female | 0          | 56      | 255     | 143     | 19      | 115     | 39      | 70      | 59       | 70        | 0         | 213   | 78   | 0            | 44   | 266  | 68     | 231                        | 50     |
|                  | person | 0          | 26      | 127     | 81      | 17      | 102     | 27      | 41      | 68       | 80        | 15        | 103   | 59   | 0            | 28   | 152  | 58     | 341                        | 88     |
| Jammu & Kashmir  | male   | 500        | 158     | 106     | 103     | 254     | 38      | 37      | 45      | 108      | 92        | 59        | 51    | 75   | 275          | 81   | 162  | 69     | 514                        | 84     |
|                  | female | 0          | 107     | 141     | 80      | 57      | 79      | 66      | 84      | 115      | 73        | 0         | 39    | 81   | 667          | 128  | 75   | 75     | 548                        | 82     |
|                  | person | 200        | 127     | 122     | 88      | 190     | 57      | 50      | 64      | 112      | 82        | 36        | 45    | 78   | 413          | 103  | 113  | 72     | 1062                       | 166    |
| Jharkhand        | male   | 21         | 28      | 33      | 36      | 61      | 66      | 12      | 14      | 43       | 110       | 19        | 68    | 42   | 14           | 7    | 50   | 46     | 855                        | 76     |
|                  | female | 30         | 42      | 20      | 21      | 90      | 36      | 70      | 67      | 71       | 64        | 28        | 167   | 59   | 60           | 61   | 51   | 66     | 1113                       | 76     |
|                  | person | 26         | 36      | 27      | 29      | 75      | 51      | 38      | 41      | 55       | 86        | 23        | 120   | 50   | 35           | 32   | 50   | 56     | 1968                       | 152    |
| Karnataka        | male   | 64         | 59      | 40      | 61      | 38      | 43      | 52      | 44      | 47       | 67        | 32        | 77    | 53   | 87           | 45   | 60   | 49     | 3699                       | 296    |
|                  | female | 54         | 74      | 48      | 39      | 40      | 55      | 83      | 72      | 64       | 40        | 48        | 131   | 61   | 40           | 51   | 56   | 67     | 4058                       | 299    |
|                  | person | 59         | 66      | 43      | 50      | 39      | 49      | 68      | 57      | 56       | 54        | 40        | 100   | 57   | 61           | 48   | 58   | 58     | 7758                       | 595    |
| Kerala           | male   | 187        | 179     | 136     | 171     | 222     | 185     | 179     | 223     | 243      | 310       | 299       | 369   | 235  | 0            | 227  | 214  | 279    | 9126                       | 480    |
|                  | female | 173        | 169     | 204     | 200     | 152     | 282     | 235     | 199     | 240      | 321       | 302       | 285   | 244  | 149          | 264  | 224  | 277    | 10520                      | 583    |
|                  | person | 179        | 174     | 172     | 186     | 184     | 238     | 208     | 211     | 242      | 316       | 301       | 324   | 240  | 79           | 249  | 220  | 278    | 19647                      | 1063   |

Continued

Table (36): Number per 1000 of persons reporting ailment during the last 15 days by mpce class and social group for each sex and State/UT

Urban

| state / ut     | sex    | mpce class |           |           |           |           |           |           |           |            |             |             |        |      | social group |      |      |        | persons reporting ailment* |        |
|----------------|--------|------------|-----------|-----------|-----------|-----------|-----------|-----------|-----------|------------|-------------|-------------|--------|------|--------------|------|------|--------|----------------------------|--------|
|                |        | 0 – 300    | 300 – 350 | 350 – 425 | 425 – 500 | 500 – 575 | 575 – 665 | 665 – 775 | 775 – 915 | 915 – 1120 | 1120 – 1500 | 1500 – 1925 | 1925 + | all  | ST           | SC   | OBC  | others | estd. no. (00)             | sample |
| (1)            | (2)    | (3)        | (4)       | (5)       | (6)       | (7)       | (8)       | (9)       | (10)      | (11)       | (12)        | (13)        | (14)   | (15) | (16)         | (17) | (18) | (19)   | (20)                       | (21)   |
| Madhya Pradesh | male   | 80         | 57        | 37        | 45        | 42        | 48        | 86        | 62        | 71         | 42          | 90          | 199    | 60   | 69           | 82   | 54   | 58     | 4583                       | 275    |
|                | female | 55         | 70        | 60        | 78        | 68        | 66        | 65        | 66        | 78         | 102         | 204         | 73     | 71   | 63           | 75   | 69   | 73     | 5006                       | 286    |
| Maharashtra    | person | 68         | 64        | 48        | 60        | 54        | 57        | 76        | 64        | 75         | 69          | 144         | 138    | 65   | 66           | 78   | 61   | 65     | 9589                       | 561    |
|                | male   | 45         | 129       | 112       | 92        | 73        | 50        | 123       | 100       | 101        | 136         | 163         | 170    | 115  | 78           | 79   | 79   | 141    | 22832                      | 803    |
| Manipur        | female | 12         | 45        | 85        | 75        | 18        | 55        | 144       | 127       | 159        | 134         | 126         | 210    | 122  | 61           | 84   | 93   | 146    | 22026                      | 864    |
|                | person | 27         | 91        | 97        | 84        | 44        | 52        | 133       | 113       | 126        | 135         | 144         | 190    | 118  | 69           | 81   | 85   | 143    | 44858                      | 1667   |
| Meghalaya      | male   | 0          | 0         | 0         | 0         | 14        | 1         | 43        | 19        | 18         | 50          | 0           | 0      | 20   | 3            | 0    | 24   | 16     | 56                         | 33     |
|                | female | 0          | 0         | 4         | 20        | 0         | 10        | 58        | 19        | 64         | 103         | 0           | 0      | 34   | 60           | 0    | 38   | 7      | 95                         | 46     |
| Mizoram        | person | 0          | 0         | 2         | 11        | 7         | 6         | 50        | 19        | 41         | 78          | 0           | 0      | 27   | 28           | 0    | 31   | 11     | 151                        | 79     |
|                | male   | 0          | 200       | 0         | 104       | 19        | 96        | 11        | 4         | 5          | 32          | 10          | 6      | 20   | 27           | 0    | 99   | 4      | 27                         | 22     |
| Nagaland       | female | 0          | 250       | 0         | 0         | 253       | 4         | 15        | 21        | 31         | 95          | 111         | 258    | 75   | 84           | 109  | 35   | 55     | 114                        | 38     |
|                | person | 0          | 231       | 0         | 51        | 150       | 50        | 13        | 13        | 18         | 69          | 58          | 162    | 50   | 58           | 49   | 61   | 30     | 140                        | 60     |
| Orissa         | male   | 45         | 0         | 0         | 0         | 0         | 6         | 25        | 2         | 9          | 17          | 30          | 58     | 17   | 17           | 0    | 0    | 0      | 23                         | 48     |
|                | female | 22         | 0         | 0         | 52        | 0         | 0         | 28        | 10        | 20         | 17          | 29          | 12     | 18   | 18           | 0    | 0    | 0      | 26                         | 42     |
| Orissa         | person | 33         | 0         | 0         | 27        | 0         | 3         | 26        | 6         | 15         | 17          | 29          | 34     | 17   | 18           | 0    | 0    | 0      | 50                         | 90     |
|                | male   | 0          | 0         | 0         | 0         | 0         | 250       | 36        | 47        | 59         | 61          | 36          | 133    | 58   | 66           | 3    | 0    | 78     | 74                         | 21     |
| Orissa         | female | 0          | 0         | 0         | 0         | 0         | 0         | 0         | 36        | 73         | 65          | 22          | 0      | 46   | 47           | 146  | 0    | 0      | 52                         | 13     |
|                | person | 0          | 0         | 0         | 0         | 0         | 167       | 22        | 41        | 64         | 63          | 28          | 68     | 52   | 57           | 57   | 0    | 53     | 125                        | 34     |
| Orissa         | male   | 52         | 53        | 82        | 43        | 59        | 41        | 52        | 66        | 77         | 56          | 35          | 29     | 56   | 41           | 43   | 56   | 67     | 1176                       | 98     |
|                | female | 40         | 24        | 20        | 45        | 102       | 13        | 88        | 22        | 120        | 41          | 8           | 36     | 52   | 58           | 49   | 37   | 66     | 1019                       | 79     |
| Orissa         | person | 47         | 37        | 49        | 44        | 79        | 30        | 71        | 44        | 98         | 48          | 19          | 32     | 54   | 49           | 46   | 47   | 67     | 2195                       | 177    |

Continued

Table (36): Number per 1000 of persons reporting ailment during the last 15 days by mpce class and social group for each sex and State/UT

Urban

| state / ut    | sex    | mpce class |         |         |         |         |         |         |         |          |           |           |       |      | social group |      |      |        | persons reporting ailment* |        |
|---------------|--------|------------|---------|---------|---------|---------|---------|---------|---------|----------|-----------|-----------|-------|------|--------------|------|------|--------|----------------------------|--------|
|               |        | 0-300      | 300-350 | 350-425 | 425-500 | 500-575 | 575-665 | 665-775 | 775-915 | 915-1120 | 1120-1500 | 1500-1925 | 1925+ | all  | ST           | SC   | OBC  | others | estd. no. (00)             | sample |
| (1)           | (2)    | (3)        | (4)     | (5)     | (6)     | (7)     | (8)     | (9)     | (10)    | (11)     | (12)      | (13)      | (14)  | (15) | (16)         | (17) | (18) | (19)   | (20)                       | (21)   |
| Punjab        | male   | 41         | 51      | 92      | 55      | 45      | 77      | 182     | 98      | 120      | 78        | 131       | 139   | 100  | 0            | 101  | 107  | 97     | 4104                       | 192    |
|               | female | 0          | 0       | 36      | 76      | 109     | 72      | 103     | 142     | 162      | 142       | 232       | 171   | 115  | 0            | 82   | 109  | 139    | 4026                       | 216    |
|               | person | 23         | 24      | 62      | 65      | 78      | 75      | 147     | 118     | 135      | 108       | 180       | 153   | 107  | 0            | 92   | 108  | 117    | 8130                       | 408    |
| Rajasthan     | male   | 0          | 157     | 59      | 55      | 84      | 74      | 46      | 73      | 97       | 58        | 100       | 37    | 69   | 80           | 71   | 77   | 61     | 3748                       | 259    |
|               | female | 1          | 58      | 85      | 61      | 33      | 56      | 68      | 115     | 61       | 70        | 184       | 117   | 76   | 68           | 84   | 65   | 83     | 3841                       | 261    |
|               | person | 1          | 108     | 72      | 58      | 57      | 66      | 57      | 92      | 81       | 64        | 142       | 76    | 72   | 74           | 77   | 71   | 72     | 7589                       | 520    |
| Sikkim        | male   | 0          | 0       | 0       | 0       | 0       | 0       | 0       | 22      | 1        | 22        | 0         | 0     | 8    | 13           | 21   | 6    | 0      | 2                          | 6      |
|               | female | 0          | 0       | 0       | 0       | 0       | 0       | 5       | 45      | 10       | 18        | 0         | 0     | 18   | 39           | 64   | 3    | 0      | 5                          | 7      |
|               | person | 0          | 0       | 0       | 0       | 0       | 0       | 3       | 34      | 5        | 20        | 0         | 0     | 13   | 26           | 37   | 5    | 0      | 7                          | 13     |
| Tamil Nadu    | male   | 91         | 70      | 85      | 69      | 75      | 64      | 114     | 94      | 99       | 111       | 54        | 71    | 87   | 5            | 84   | 89   | 76     | 9461                       | 572    |
|               | female | 73         | 133     | 136     | 106     | 128     | 93      | 111     | 90      | 116      | 116       | 99        | 80    | 106  | 0            | 95   | 111  | 86     | 11192                      | 683    |
|               | person | 82         | 101     | 112     | 87      | 101     | 78      | 113     | 92      | 107      | 114       | 75        | 75    | 96   | 3            | 90   | 100  | 80     | 20654                      | 1255   |
| Tripura       | male   | 0          | 111     | 18      | 44      | 42      | 59      | 129     | 120     | 61       | 146       | 0         | 30    | 72   | 0            | 69   | 33   | 106    | 156                        | 44     |
|               | female | 0          | 0       | 112     | 58      | 124     | 15      | 116     | 113     | 101      | 26        | 10        | 101   | 71   | 17           | 37   | 65   | 98     | 148                        | 49     |
|               | person | 0          | 65      | 53      | 51      | 74      | 34      | 123     | 116     | 83       | 83        | 5         | 66    | 72   | 10           | 55   | 48   | 102    | 305                        | 93     |
| Uttaranchal   | male   | 30         | 330     | 65      | 31      | 69      | 8       | 13      | 16      | 132      | 90        | 42        | 69    | 65   | 0            | 28   | 19   | 97     | 593                        | 50     |
|               | female | 57         | 260     | 70      | 88      | 159     | 21      | 26      | 41      | 54       | 124       | 66        | 66    | 65   | 0            | 77   | 36   | 72     | 510                        | 54     |
|               | person | 45         | 296     | 67      | 54      | 103     | 14      | 18      | 29      | 93       | 104       | 56        | 68    | 65   | 0            | 50   | 26   | 85     | 1103                       | 104    |
| Uttar Pradesh | male   | 56         | 89      | 82      | 79      | 101     | 92      | 124     | 106     | 68       | 123       | 109       | 98    | 93   | 67           | 92   | 84   | 104    | 16435                      | 893    |
|               | female | 92         | 91      | 72      | 124     | 138     | 94      | 163     | 118     | 152      | 166       | 134       | 230   | 126  | 165          | 94   | 106  | 162    | 20021                      | 931    |
|               | person | 74         | 90      | 77      | 101     | 119     | 93      | 142     | 112     | 104      | 143       | 121       | 158   | 108  | 113          | 93   | 94   | 131    | 36455                      | 1824   |

Continued

Table (36): Number per 1000 of persons reporting ailment during the last 15 days by mpce class and social group for each sex and State/UT

Urban

| state / ut        | sex    | mpce class |           |           |           |           |           |           |           |            |             |             |        |      | social group |      |      |        | persons reporting ailment* |        |
|-------------------|--------|------------|-----------|-----------|-----------|-----------|-----------|-----------|-----------|------------|-------------|-------------|--------|------|--------------|------|------|--------|----------------------------|--------|
|                   |        | 0 – 300    | 300 – 350 | 350 – 425 | 425 – 500 | 500 – 575 | 575 – 665 | 665 – 775 | 775 – 915 | 915 – 1120 | 1120 – 1500 | 1500 – 1925 | 1925 + | all  | ST           | SC   | OBC  | others | estd. no. (00)             | sample |
| (1)               | (2)    | (3)        | (4)       | (5)       | (6)       | (7)       | (8)       | (9)       | (10)      | (11)       | (12)        | (13)        | (14)   | (15) | (16)         | (17) | (18) | (19)   | (20)                       | (21)   |
| West Bengal       | male   | 109        | 75        | 160       | 141       | 115       | 110       | 124       | 98        | 124        | 157         | 142         | 230    | 137  | 86           | 126  | 92   | 145    | 13306                      | 613    |
|                   | female | 74         | 74        | 183       | 121       | 148       | 185       | 165       | 104       | 204        | 204         | 252         | 318    | 178  | 73           | 138  | 111  | 198    | 15693                      | 723    |
| A & N Islands     | person | 89         | 75        | 171       | 131       | 131       | 146       | 143       | 101       | 157        | 180         | 196         | 274    | 157  | 79           | 132  | 101  | 170    | 28999                      | 1336   |
|                   | male   | 0          | 0         | 0         | 0         | 0         | 257       | 22        | 5         | 62         | 118         | 27          | 124    | 58   | 0            | 0    | 0    | 58     | 32                         | 18     |
| Chandigarh        | female | 0          | 0         | 0         | 0         | 0         | 0         | 77        | 110       | 17         | 27          | 32          | 11     | 61   | 0            | 0    | 0    | 61     | 29                         | 21     |
|                   | person | 0          | 0         | 0         | 0         | 0         | 166       | 46        | 58        | 41         | 81          | 29          | 62     | 59   | 0            | 0    | 0    | 59     | 61                         | 39     |
| Dadra & N. Haveli | male   | 0          | 0         | 0         | 21        | 0         | 69        | 104       | 86        | 64         | 62          | 17          | 60     | 55   | 0            | 12   | 45   | 63     | 194                        | 67     |
|                   | female | 25         | 0         | 0         | 17        | 0         | 3         | 4         | 65        | 100        | 58          | 117         | 102    | 89   | 0            | 113  | 54   | 89     | 258                        | 78     |
| Daman & Diu       | person | 9          | 0         | 0         | 19        | 0         | 31        | 59        | 75        | 83         | 61          | 58          | 81     | 71   | 0            | 54   | 49   | 74     | 452                        | 145    |
|                   | male   | 0          | 0         | 0         | 0         | 0         | 0         | 0         | 22        | 13         | 0           | 142         | 0      | 18   | 4            | 0    | 0    | 22     | 3                          | 5      |
| Lakshadweep       | female | 0          | 0         | 0         | 0         | 0         | 0         | 0         | 225       | 0          | 0           | 26          | 0      | 34   | 0            | 0    | 0    | 57     | 4                          | 2      |
|                   | person | 0          | 0         | 0         | 0         | 0         | 0         | 0         | 99        | 10         | 0           | 88          | 0      | 24   | 2            | 0    | 0    | 34     | 7                          | 7      |
| Pondicherry       | male   | 0          | 0         | 0         | 0         | 0         | 0         | 0         | 27        | 13         | 68          | 0           | 0      | 30   | 0            | 0    | 51   | 31     | 6                          | 8      |
|                   | female | 0          | 0         | 0         | 0         | 0         | 0         | 0         | 75        | 38         | 57          | 0           | 0      | 41   | 0            | 250  | 55   | 38     | 7                          | 7      |
| Lakshadweep       | person | 0          | 0         | 0         | 0         | 0         | 0         | 0         | 51        | 25         | 63          | 0           | 0      | 35   | 0            | 125  | 53   | 34     | 13                         | 15     |
|                   | male   | 0          | 0         | 0         | 0         | 159       | 35        | 174       | 55        | 185        | 83          | 184         | 683    | 112  | 105          | 0    | 230  | 1000   | 16                         | 30     |
| Pondicherry       | female | 0          | 0         | 0         | 89        | 276       | 192       | 0         | 171       | 167        | 302         | 231         | 333    | 168  | 168          | 0    | 0    | 0      | 24                         | 44     |
|                   | person | 0          | 0         | 0         | 43        | 221       | 109       | 87        | 111       | 175        | 175         | 205         | 513    | 140  | 137          | 0    | 230  | 1000   | 40                         | 74     |
| Pondicherry       | male   | 446        | 148       | 89        | 99        | 160       | 65        | 103       | 283       | 41         | 78          | 171         | 377    | 149  | 95           | 94   | 145  | 219    | 484                        | 72     |
|                   | female | 631        | 286       | 354       | 171       | 194       | 293       | 157       | 241       | 211        | 153         | 113         | 504    | 225  | 125          | 163  | 239  | 208    | 691                        | 97     |
| Pondicherry       | person | 532        | 224       | 220       | 137       | 177       | 156       | 130       | 261       | 124        | 115         | 140         | 427    | 186  | 115          | 124  | 191  | 214    | 1175                       | 169    |

Continued

1  
2  
3  
4  
5  
6  
7  
8  
9  
10  
11  
12  
13  
14  
15  
16  
17  
18  
19  
20  
21  
22  
23  
24  
25  
26  
27  
28  
29  
30  
31  
32  
33  
34  
35  
36  
37  
38  
39  
40  
41  
42  
43  
44  
45  
46  
47

Table (36): Number per 1000 of persons reporting ailment during the last 15 days by mpce class and social group for each sex and State/UT

Urban

| state / ut | sex    | mpce class |           |           |           |           |           |           |           |            |             |             |        |      | social group |      |      |        | persons reporting ailment* |        |
|------------|--------|------------|-----------|-----------|-----------|-----------|-----------|-----------|-----------|------------|-------------|-------------|--------|------|--------------|------|------|--------|----------------------------|--------|
|            |        | 0 – 300    | 300 – 350 | 350 – 425 | 425 – 500 | 500 – 575 | 575 – 665 | 665 – 775 | 775 – 915 | 915 – 1120 | 1120 – 1500 | 1500 – 1925 | 1925 + | all  | ST           | SC   | OBC  | others | estd. no. (00)             | sample |
| (1)        | (2)    | (3)        | (4)       | (5)       | (6)       | (7)       | (8)       | (9)       | (10)      | (11)       | (12)        | (13)        | (14)   | (15) | (16)         | (17) | (18) | (19)   | (20)                       | (21)   |
| ONES       | male   | 12         | 116       | 14        | 22        | 25        | 20        | 57        | 31        | 29         | 61          | 16          | 59     | 37   | 34           | 49   | 24   | 55     | 363                        | 209    |
|            | female | 13         | 35        | 76        | 39        | 72        | 9         | 60        | 37        | 53         | 54          | 45          | 85     | 48   | 48           | 39   | 41   | 60     | 467                        | 233    |
|            | person | 12         | 76        | 40        | 31        | 47        | 15        | 59        | 34        | 41         | 57          | 31          | 72     | 42   | 41           | 45   | 32   | 57     | 830                        | 442    |
| GUTs       | male   | 311        | 145       | 63        | 85        | 153       | 67        | 91        | 162       | 51         | 69          | 70          | 102    | 94   | 84           | 36   | 140  | 74     | 735                        | 200    |
|            | female | 501        | 284       | 208       | 150       | 186       | 262       | 130       | 178       | 144        | 84          | 107         | 133    | 148  | 120          | 125  | 229  | 92     | 1013                       | 249    |
|            | person | 394        | 221       | 142       | 118       | 169       | 147       | 110       | 170       | 96         | 75          | 87          | 117    | 119  | 106          | 74   | 183  | 82     | 1748                       | 449    |
| all India  | male   | 68         | 86        | 80        | 77        | 80        | 73        | 91        | 85        | 88         | 111         | 104         | 132    | 91   | 60           | 80   | 84   | 102    | 115986                     | 6454   |
|            | female | 61         | 92        | 85        | 89        | 90        | 98        | 113       | 102       | 115        | 126         | 127         | 168    | 108  | 63           | 91   | 98   | 125    | 126691                     | 7147   |
|            | person | 65         | 89        | 83        | 83        | 85        | 85        | 101       | 93        | 100        | 118         | 115         | 149    | 99   | 61           | 86   | 91   | 113    | 242677                     | 13601  |

\* during the last 15 days

Table (36): Number per 1000 of persons reporting ailment during the last 15 days by mpce class and social group for each sex and State/UT

## Rural + Urban

| state / ut        | sex    | mpce class |           |           |           |           |           |           |           |           |           |            |        |      | social group |      |      |        | persons reporting ailment* |        |
|-------------------|--------|------------|-----------|-----------|-----------|-----------|-----------|-----------|-----------|-----------|-----------|------------|--------|------|--------------|------|------|--------|----------------------------|--------|
|                   |        | 0 – 235    | 235 – 265 | 265 – 320 | 320 – 365 | 365 – 410 | 410 – 460 | 460 – 520 | 520 – 605 | 605 – 730 | 730 – 980 | 980 – 1285 | 1285 + | all  | ST           | SC   | OBC  | others | estd. no. (00)             | sample |
| (1)               | (2)    | (3)        | (4)       | (5)       | (6)       | (7)       | (8)       | (9)       | (10)      | (11)      | (12)      | (13)       | (14)   | (15) | (16)         | (17) | (18) | (19)   | (20)                       | (21)   |
| Andhra Pradesh    | male   | 77         | 54        | 79        | 87        | 81        | 78        | 75        | 95        | 79        | 110       | 173        | 135    | 91   | 67           | 86   | 83   | 114    | 32624                      | 1314   |
|                   | female | 43         | 69        | 83        | 90        | 73        | 97        | 103       | 120       | 99        | 115       | 120        | 211    | 102  | 72           | 80   | 98   | 134    | 36675                      | 1457   |
| Arunachal Pradesh | person | 59         | 61        | 81        | 89        | 77        | 88        | 89        | 108       | 89        | 112       | 145        | 170    | 96   | 69           | 83   | 90   | 124    | 69299                      | 2771   |
|                   | male   | 72         | 0         | 1         | 64        | 28        | 55        | 107       | 89        | 47        | 47        | 62         | 45     | 59   | 70           | 194  | 0    | 23     | 272                        | 159    |
| Assam             | female | 92         | 190       | 44        | 67        | 37        | 21        | 57        | 35        | 73        | 50        | 90         | 59     | 61   | 69           | 108  | 69   | 30     | 260                        | 156    |
|                   | person | 82         | 101       | 20        | 65        | 32        | 38        | 83        | 64        | 59        | 48        | 74         | 52     | 60   | 70           | 162  | 34   | 26     | 532                        | 315    |
| Bihar             | male   | 117        | 51        | 146       | 69        | 68        | 91        | 99        | 62        | 56        | 69        | 84         | 69     | 78   | 66           | 69   | 90   | 78     | 9860                       | 542    |
|                   | female | 193        | 30        | 135       | 73        | 104       | 92        | 87        | 73        | 71        | 83        | 48         | 129    | 87   | 66           | 90   | 85   | 93     | 9675                       | 527    |
| Chhattisgarh      | person | 156        | 40        | 140       | 71        | 86        | 91        | 94        | 67        | 63        | 76        | 67         | 97     | 82   | 66           | 79   | 87   | 85     | 19535                      | 1069   |
|                   | male   | 43         | 36        | 45        | 39        | 59        | 63        | 47        | 59        | 93        | 72        | 79         | 54     | 54   | 45           | 55   | 54   | 51     | 19394                      | 691    |
| Delhi             | female | 27         | 42        | 38        | 49        | 52        | 63        | 78        | 84        | 61        | 64        | 74         | 56     | 54   | 53           | 58   | 53   | 54     | 17957                      | 653    |
|                   | person | 36         | 39        | 42        | 44        | 55        | 63        | 62        | 71        | 78        | 68        | 77         | 55     | 54   | 49           | 57   | 54   | 52     | 37351                      | 1344   |
| Goa               | male   | 96         | 55        | 68        | 51        | 54        | 59        | 88        | 64        | 65        | 88        | 15         | 125    | 68   | 57           | 89   | 71   | 69     | 6928                       | 303    |
|                   | female | 68         | 67        | 63        | 38        | 71        | 63        | 87        | 142       | 112       | 147       | 71         | 61     | 71   | 43           | 95   | 87   | 70     | 7165                       | 312    |
| Gujarat           | person | 82         | 61        | 66        | 44        | 63        | 61        | 88        | 100       | 87        | 115       | 41         | 94     | 70   | 50           | 92   | 79   | 69     | 14094                      | 615    |
|                   | male   | 0          | 27        | 7         | 11        | 55        | 3         | 9         | 28        | 8         | 14        | 4          | 15     | 13   | 0            | 13   | 16   | 12     | 846                        | 59     |
| Haryana           | female | 0          | 103       | 0         | 34        | 0         | 38        | 19        | 3         | 1         | 20        | 15         | 15     | 15   | 0            | 19   | 6    | 18     | 798                        | 55     |
|                   | person | 0          | 68        | 4         | 23        | 24        | 18        | 14        | 16        | 6         | 16        | 8          | 15     | 14   | 0            | 16   | 12   | 15     | 1644                       | 114    |
| Jharkhand         | male   | 0          | 0         | 0         | 216       | 57        | 36        | 0         | 106       | 127       | 20        | 142        | 200    | 117  | 823          | 25   | 153  | 109    | 982                        | 40     |
|                   | female | 0          | 0         | 0         | 92        | 403       | 0         | 91        | 148       | 80        | 90        | 81         | 171    | 131  | 478          | 273  | 303  | 118    | 1094                       | 50     |
| Karnataka         | person | 0          | 0         | 0         | 150       | 187       | 21        | 42        | 126       | 102       | 50        | 107        | 184    | 124  | 625          | 159  | 216  | 113    | 2076                       | 90     |

Continued

Table (36): Number per 1000 of persons reporting ailment during the last 15 days by mpce class and social group for each sex and State/UT

## Rural + Urban

| state / ut       | sex    | mpce class |           |           |           |           |           |           |           |           |           |            |        |      | social group |      |      |        | persons reporting ailment* |        |
|------------------|--------|------------|-----------|-----------|-----------|-----------|-----------|-----------|-----------|-----------|-----------|------------|--------|------|--------------|------|------|--------|----------------------------|--------|
|                  |        | 0 – 235    | 235 – 265 | 265 – 320 | 320 – 365 | 365 – 410 | 410 – 460 | 460 – 520 | 520 – 605 | 605 – 730 | 730 – 980 | 980 – 1285 | 1285 + | all  | ST           | SC   | OBC  | others | estd. no. (00)             | sample |
| (1)              | (2)    | (3)        | (4)       | (5)       | (6)       | (7)       | (8)       | (9)       | (10)      | (11)      | (12)      | (13)       | (14)   | (15) | (16)         | (17) | (18) | (19)   | (20)                       | (21)   |
| Gujarat          | male   | 25         | 5         | 42        | 46        | 75        | 76        | 56        | 74        | 73        | 85        | 79         | 110    | 72   | 54           | 71   | 69   | 84     | 17457                      | 634    |
|                  | female | 34         | 22        | 34        | 63        | 72        | 78        | 79        | 59        | 60        | 81        | 96         | 91     | 71   | 63           | 71   | 61   | 87     | 16208                      | 603    |
|                  | person | 29         | 13        | 38        | 54        | 74        | 77        | 68        | 67        | 67        | 83        | 87         | 101    | 72   | 59           | 71   | 65   | 85     | 33665                      | 1237   |
| Haryana          | male   | 145        | 21        | 67        | 28        | 104       | 38        | 49        | 63        | 85        | 130       | 83         | 101    | 86   | 241          | 97   | 97   | 72     | 8888                       | 410    |
|                  | female | 0          | 212       | 38        | 63        | 99        | 112       | 60        | 78        | 60        | 126       | 132        | 172    | 102  | 371          | 101  | 92   | 108    | 9049                       | 375    |
|                  | person | 82         | 91        | 52        | 44        | 102       | 69        | 54        | 70        | 73        | 128       | 105        | 132    | 93   | 317          | 99   | 95   | 89     | 17937                      | 785    |
| Himachal Pradesh | male   | 0          | 14        | 86        | 52        | 30        | 63        | 79        | 61        | 60        | 88        | 87         | 69     | 70   | 85           | 60   | 86   | 68     | 2007                       | 322    |
|                  | female | 36         | 67        | 56        | 108       | 68        | 70        | 57        | 65        | 65        | 110       | 137        | 199    | 99   | 52           | 85   | 136  | 98     | 2944                       | 421    |
|                  | person | 20         | 38        | 69        | 80        | 49        | 67        | 67        | 63        | 63        | 99        | 112        | 131    | 84   | 68           | 73   | 113  | 83     | 4951                       | 743    |
| Jammu & Kashmir  | male   | 127        | 157       | 30        | 65        | 69        | 40        | 46        | 77        | 112       | 61        | 55         | 67     | 71   | 96           | 83   | 90   | 64     | 2673                       | 258    |
|                  | female | 0          | 107       | 132       | 36        | 136       | 32        | 54        | 66        | 68        | 83        | 64         | 89     | 72   | 5            | 99   | 38   | 71     | 2546                       | 259    |
|                  | person | 94         | 127       | 85        | 50        | 103       | 36        | 50        | 72        | 92        | 71        | 59         | 78     | 71   | 51           | 91   | 65   | 67     | 5219                       | 517    |
| Jharkhand        | male   | 25         | 19        | 23        | 29        | 17        | 31        | 23        | 26        | 20        | 65        | 25         | 71     | 27   | 21           | 16   | 27   | 45     | 3304                       | 188    |
|                  | female | 17         | 27        | 39        | 36        | 37        | 46        | 56        | 84        | 53        | 42        | 22         | 137    | 45   | 42           | 23   | 50   | 56     | 5062                       | 213    |
|                  | person | 21         | 23        | 31        | 33        | 26        | 38        | 38        | 55        | 35        | 54        | 24         | 105    | 36   | 31           | 19   | 38   | 51     | 8366                       | 401    |
| Karnataka        | male   | 41         | 58        | 38        | 50        | 84        | 60        | 60        | 60        | 57        | 62        | 55         | 110    | 60   | 56           | 61   | 69   | 54     | 14067                      | 669    |
|                  | female | 33         | 73        | 48        | 46        | 60        | 60        | 72        | 77        | 67        | 54        | 45         | 148    | 63   | 65           | 53   | 63   | 67     | 14609                      | 633    |
|                  | person | 37         | 66        | 43        | 48        | 72        | 60        | 66        | 68        | 62        | 58        | 50         | 127    | 62   | 61           | 57   | 66   | 60     | 28676                      | 1302   |
| Kerala           | male   | 267        | 154       | 214       | 213       | 186       | 225       | 171       | 220       | 246       | 258       | 278        | 280    | 240  | 190          | 242  | 234  | 252    | 36061                      | 1446   |
|                  | female | 194        | 221       | 196       | 206       | 203       | 241       | 184       | 269       | 239       | 270       | 314        | 328    | 261  | 282          | 292  | 249  | 271    | 43247                      | 1772   |
|                  | person | 228        | 189       | 204       | 210       | 195       | 234       | 178       | 246       | 243       | 264       | 297        | 305    | 251  | 238          | 268  | 242  | 261    | 79308                      | 3218   |

Continued

Table (36): Number per 1000 of persons reporting ailment during the last 15 days by mpce class and social group for each sex and State/UT

Rural + Urban

| state / ut     | sex    | mpce class |           |           |           |           |           |           |           |           |           |            |        |      | social group |      |      |        | persons reporting ailment* |        |
|----------------|--------|------------|-----------|-----------|-----------|-----------|-----------|-----------|-----------|-----------|-----------|------------|--------|------|--------------|------|------|--------|----------------------------|--------|
|                |        | 0 – 235    | 235 – 265 | 265 – 320 | 320 – 365 | 365 – 410 | 410 – 460 | 460 – 520 | 520 – 605 | 605 – 730 | 730 – 980 | 980 – 1285 | 1285 + | all  | ST           | SC   | OBC  | others | estd. no. (00)             | sample |
| (1)            | (2)    | (3)        | (4)       | (5)       | (6)       | (7)       | (8)       | (9)       | (10)      | (11)      | (12)      | (13)       | (14)   | (15) | (16)         | (17) | (18) | (19)   | (20)                       | (21)   |
| Madhya Pradesh | male   | 56         | 56        | 43        | 52        | 49        | 46        | 67        | 62        | 52        | 92        | 68         | 158    | 58   | 44           | 69   | 58   | 59     | 17985                      | 700    |
|                | female | 58         | 47        | 69        | 56        | 64        | 68        | 60        | 65        | 78        | 110       | 121        | 110    | 67   | 70           | 58   | 67   | 73     | 19334                      | 709    |
| Maharashtra    | person | 57         | 52        | 56        | 54        | 57        | 57        | 64        | 63        | 64        | 100       | 92         | 135    | 62   | 56           | 64   | 63   | 66     | 37320                      | 1409   |
|                | male   | 69         | 106       | 63        | 68        | 60        | 76        | 98        | 94        | 96        | 126       | 129        | 159    | 97   | 56           | 67   | 84   | 125    | 46456                      | 1488   |
| Manipur        | female | 49         | 60        | 75        | 72        | 62        | 78        | 112       | 113       | 138       | 127       | 167        | 214    | 110  | 95           | 84   | 106  | 126    | 50677                      | 1628   |
|                | person | 58         | 83        | 69        | 70        | 61        | 77        | 105       | 103       | 116       | 126       | 148        | 186    | 103  | 75           | 75   | 95   | 126    | 97133                      | 3116   |
| Meghalaya      | male   | 0          | 0         | 0         | 7         | 11        | 6         | 27        | 10        | 13        | 55        | 18         | 25     | 7    | 0            | 37   | 12   | 252    | 106                        |        |
|                | female | 0          | 0         | 3         | 17        | 10        | 10        | 31        | 20        | 10        | 62        | 88         | 38     | 31   | 9            | 0    | 47   | 6      | 310                        | 131    |
| Mizoram        | person | 0          | 0         | 2         | 13        | 10        | 8         | 29        | 15        | 11        | 59        | 69         | 28     | 28   | 8            | 0    | 42   | 9      | 562                        | 237    |
|                | male   | 250        | 200       | 172       | 2         | 77        | 30        | 42        | 27        | 37        | 81        | 51         | 76     | 48   | 52           | 0    | 4    | 29     | 529                        | 98     |
| Nagaland       | female | 0          | 250       | 39        | 29        | 74        | 11        | 56        | 48        | 30        | 49        | 153        | 166    | 54   | 57           | 35   | 9    | 46     | 582                        | 116    |
|                | person | 111        | 231       | 104       | 15        | 75        | 21        | 49        | 37        | 34        | 64        | 99         | 122    | 51   | 54           | 14   | 7    | 37     | 1111                       | 214    |
| Orissa         | male   | 23         | 0         | 0         | 7         | 0         | 3         | 17        | 29        | 24        | 25        | 14         | 19     | 20   | 21           | 0    | 0    | 0      | 70                         | 69     |
|                | female | 11         | 0         | 0         | 36        | 0         | 0         | 21        | 6         | 30        | 26        | 5          | 17     | 18   | 18           | 0    | 0    | 0      | 59                         | 55     |
| Orissa         | person | 16         | 0         | 0         | 21        | 0         | 2         | 19        | 17        | 27        | 25        | 9          | 18     | 19   | 20           | 0    | 0    | 0      | 129                        | 124    |
|                | male   | 0          | 0         | 0         | 0         | 0         | 69        | 34        | 21        | 44        | 66        | 46         | 101    | 60   | 60           | 126  | 0    | 78     | 202                        | 62     |
| Orissa         | female | 0          | 0         | 0         | 0         | 0         | 0         | 0         | 17        | 44        | 56        | 71         | 71     | 57   | 58           | 115  | 0    | 0      | 180                        | 46     |
|                | person | 0          | 0         | 0         | 0         | 0         | 43        | 21        | 19        | 44        | 61        | 60         | 86     | 58   | 59           | 122  | 0    | 53     | 382                        | 108    |
| Orissa         | male   | 61         | 96        | 64        | 61        | 55        | 100       | 78        | 92        | 85        | 111       | 73         | 152    | 76   | 68           | 81   | 77   | 78     | 12923                      | 486    |
|                | female | 75         | 84        | 63        | 64        | 81        | 63        | 81        | 47        | 97        | 82        | 125        | 118    | 73   | 60           | 106  | 61   | 81     | 12670                      | 452    |
| Orissa         | person | 68         | 90        | 63        | 62        | 68        | 82        | 79        | 70        | 91        | 96        | 100        | 136    | 75   | 64           | 94   | 69   | 80     | 25592                      | 938    |

Continued



Table (36): Number per 1000 of persons reporting ailment during the last 15 days by mpce class and social group for each sex and State/UT

## Rural + Urban

| state / ut    | sex    | mpce class |           |           |           |           |           |           |           |           |           |            |        |      | social group |      |      |        | persons reporting ailment* |        |
|---------------|--------|------------|-----------|-----------|-----------|-----------|-----------|-----------|-----------|-----------|-----------|------------|--------|------|--------------|------|------|--------|----------------------------|--------|
|               |        | 0 – 235    | 235 – 265 | 265 – 320 | 320 – 365 | 365 – 410 | 410 – 460 | 460 – 520 | 520 – 605 | 605 – 730 | 730 – 980 | 980 – 1285 | 1285 + | all  | ST           | SC   | OBC  | others | estd. no. (00)             | sample |
| (1)           | (2)    | (3)        | (4)       | (5)       | (6)       | (7)       | (8)       | (9)       | (10)      | (11)      | (12)      | (13)       | (14)   | (15) | (16)         | (17) | (18) | (19)   | (20)                       | (21)   |
| Punjab        | male   | 104        | 30        | 59        | 52        | 97        | 58        | 148       | 93        | 68        | 88        | 182        | 153    | 109  | 0            | 113  | 102  | 109    | 13311                      | 485    |
|               | female | 25         | 0         | 44        | 81        | 175       | 73        | 91        | 134       | 162       | 163       | 159        | 223    | 146  | 0            | 136  | 119  | 163    | 15986                      | 570    |
|               | person | 67         | 15        | 51        | 67        | 135       | 66        | 122       | 112       | 107       | 124       | 171        | 186    | 127  | 0            | 124  | 110  | 134    | 29297                      | 1055   |
| Rajasthan     | male   | 12         | 90        | 58        | 44        | 40        | 75        | 45        | 47        | 58        | 64        | 67         | 107    | 56   | 36           | 52   | 61   | 58     | 14634                      | 734    |
|               | female | 29         | 27        | 63        | 40        | 46        | 40        | 46        | 73        | 77        | 83        | 134        | 116    | 64   | 43           | 76   | 64   | 67     | 15803                      | 707    |
|               | person | 21         | 57        | 61        | 42        | 43        | 58        | 46        | 59        | 67        | 73        | 102        | 111    | 60   | 39           | 63   | 62   | 62     | 30437                      | 1441   |
| Sikkim        | male   | 444        | 0         | 12        | 144       | 15        | 115       | 73        | 42        | 47        | 39        | 112        | 73     | 61   | 68           | 59   | 65   | 4      | 139                        | 75     |
|               | female | 0          | 0         | 6         | 33        | 17        | 149       | 78        | 33        | 24        | 7         | 8          | 0      | 37   | 59           | 26   | 26   | 29     | 81                         | 62     |
|               | person | 268        | 0         | 9         | 85        | 16        | 135       | 75        | 38        | 36        | 21        | 62         | 44     | 49   | 63           | 43   | 46   | 16     | 220                        | 137    |
| Tamil Nadu    | male   | 85         | 65        | 69        | 72        | 83        | 62        | 82        | 74        | 95        | 121       | 106        | 103    | 86   | 14           | 79   | 91   | 81     | 26273                      | 1097   |
|               | female | 84         | 102       | 89        | 96        | 102       | 92        | 115       | 80        | 101       | 121       | 146        | 121    | 104  | 1            | 102  | 108  | 90     | 31962                      | 1260   |
|               | person | 84         | 83        | 80        | 84        | 93        | 77        | 99        | 77        | 98        | 121       | 126        | 111    | 95   | 8            | 91   | 100  | 85     | 58235                      | 2357   |
| Tripura       | male   | 370        | 71        | 63        | 75        | 117       | 119       | 152       | 135       | 153       | 121       | 115        | 94     | 118  | 127          | 127  | 77   | 134    | 1910                       | 295    |
|               | female | 218        | 138       | 66        | 92        | 190       | 141       | 179       | 84        | 138       | 118       | 132        | 62     | 126  | 144          | 131  | 108  | 120    | 1802                       | 299    |
|               | person | 291        | 101       | 64        | 83        | 149       | 130       | 166       | 111       | 146       | 119       | 123        | 80     | 122  | 135          | 129  | 91   | 127    | 3712                       | 594    |
| Uttaranchal   | male   | 30         | 5         | 19        | 28        | 55        | 21        | 21        | 72        | 152       | 73        | 107        | 49     | 57   | 67           | 23   | 56   | 71     | 2408                       | 115    |
|               | female | 57         | 6         | 18        | 51        | 37        | 67        | 5         | 71        | 65        | 58        | 58         | 131    | 53   | 28           | 39   | 42   | 62     | 1989                       | 109    |
|               | person | 45         | 5         | 19        | 37        | 46        | 41        | 14        | 71        | 109       | 66        | 80         | 90     | 55   | 49           | 30   | 50   | 67     | 4397                       | 224    |
| Uttar Pradesh | male   | 67         | 67        | 78        | 90        | 89        | 93        | 108       | 115       | 95        | 109       | 119        | 132    | 95   | 28           | 92   | 88   | 114    | 80394                      | 3069   |
|               | female | 74         | 67        | 82        | 91        | 111       | 93        | 133       | 117       | 131       | 138       | 143        | 196    | 109  | 87           | 100  | 102  | 131    | 84758                      | 3123   |
|               | person | 70         | 67        | 80        | 91        | 100       | 93        | 120       | 116       | 112       | 123       | 130        | 161    | 102  | 57           | 96   | 95   | 122    | 165152                     | 6192   |

Continued

Table (36): Number per 1000 of persons reporting ailment during the last 15 days by mpce class and social group for each sex and State/UT

Rural + Urban

| state / ut        | sex    | mpce class |           |           |           |           |           |           |           |           |           |            |        |      | social group |      |      |        | persons reporting ailment* |        |
|-------------------|--------|------------|-----------|-----------|-----------|-----------|-----------|-----------|-----------|-----------|-----------|------------|--------|------|--------------|------|------|--------|----------------------------|--------|
|                   |        | 0 – 235    | 235 – 265 | 265 – 320 | 320 – 365 | 365 – 410 | 410 – 460 | 460 – 520 | 520 – 605 | 605 – 730 | 730 – 980 | 980 – 1285 | 1285 + | all  | ST           | SC   | OBC  | others | estd. no. (00)             | sample |
| (1)               | (2)    | (3)        | (4)       | (5)       | (6)       | (7)       | (8)       | (9)       | (10)      | (11)      | (12)      | (13)       | (14)   | (15) | (16)         | (17) | (18) | (19)   | (20)                       | (21)   |
| West Bengal       | male   | 99         | 58        | 82        | 113       | 107       | 112       | 132       | 117       | 139       | 134       | 142        | 206    | 120  | 61           | 111  | 114  | 130    | 47060                      | 1521   |
|                   | female | 75         | 60        | 80        | 109       | 106       | 120       | 132       | 118       | 150       | 162       | 233        | 253    | 128  | 54           | 118  | 122  | 141    | 48739                      | 1654   |
| A & N Islands     | person | 87         | 59        | 81        | 111       | 107       | 116       | 132       | 118       | 144       | 147       | 184        | 230    | 124  | 57           | 114  | 118  | 135    | 95799                      | 3175   |
|                   | male   | 0          | 0         | 0         | 0         | 3         | 195       | 22        | 5         | 90        | 56        | 22         | 59     | 46   | 17           | 0    | 0    | 49     | 84                         | 41     |
| Chandigarh        | female | 0          | 0         | 0         | 0         | 0         | 0         | 40        | 77        | 8         | 46        | 23         | 140    | 62   | 22           | 0    | 0    | 66     | 93                         | 34     |
|                   | person | 0          | 0         | 0         | 0         | 2         | 104       | 32        | 43        | 53        | 52        | 23         | 101    | 53   | 20           | 0    | 0    | 57     | 177                        | 75     |
| Dadra & N. Haveli | male   | 0          | 0         | 0         | 21        | 0         | 35        | 102       | 67        | 59        | 60        | 16         | 58     | 51   | 0            | 16   | 22   | 60     | 207                        | 86     |
|                   | female | 25         | 0         | 0         | 17        | 186       | 2         | 3         | 56        | 91        | 63        | 102        | 101    | 89   | 6            | 108  | 58   | 89     | 292                        | 99     |
| Daman & Diu       | person | 9          | 0         | 0         | 19        | 102       | 19        | 57        | 62        | 76        | 61        | 52         | 79     | 68   | 5            | 54   | 35   | 73     | 499                        | 185    |
|                   | male   | 0          | 0         | 0         | 0         | 0         | 62        | 0         | 3         | 10        | 9         | 17         | 5      | 11   | 10           | 0    | 0    | 20     | 14                         | 12     |
| Lakshadweep       | female | 0          | 0         | 0         | 0         | 0         | 51        | 10        | 66        | 74        | 0         | 1          | 0      | 22   | 16           | 0    | 0    | 72     | 27                         | 8      |
|                   | person | 0          | 0         | 0         | 0         | 0         | 58        | 5         | 34        | 40        | 4         | 8          | 4      | 16   | 13           | 0    | 0    | 41     | 41                         | 20     |
| Pondicherry       | male   | 0          | 0         | 0         | 0         | 0         | 0         | 0         | 20        | 28        | 19        | 3          | 2      | 12   | 0            | 0    | 28   | 8      | 10                         | 12     |
|                   | female | 0          | 0         | 0         | 0         | 0         | 0         | 0         | 46        | 32        | 68        | 67         | 25     | 42   | 0            | 88   | 93   | 25     | 22                         | 17     |
| Lakshadweep       | person | 0          | 0         | 0         | 0         | 0         | 0         | 0         | 34        | 29        | 34        | 36         | 9      | 23   | 0            | 44   | 61   | 12     | 32                         | 29     |
|                   | male   | 0          | 0         | 83        | 0         | 94        | 30        | 167       | 49        | 135       | 90        | 176        | 75     | 98   | 91           | 0    | 173  | 590    | 25                         | 49     |
| Pondicherry       | female | 0          | 0         | 0         | 89        | 222       | 207       | 28        | 163       | 125       | 186       | 129        | 294    | 156  | 155          | 0    | 500  | 0      | 42                         | 83     |
|                   | person | 0          | 0         | 43        | 43        | 156       | 114       | 89        | 105       | 130       | 143       | 153        | 171    | 127  | 124          | 0    | 238  | 498    | 67                         | 132    |
| Pondicherry       | male   | 511        | 148       | 187       | 81        | 187       | 83        | 185       | 262       | 53        | 118       | 142        | 218    | 154  | 95           | 161  | 146  | 222    | 773                        | 106    |
|                   | female | 631        | 286       | 419       | 126       | 143       | 275       | 139       | 192       | 231       | 143       | 97         | 248    | 194  | 125          | 128  | 210  | 202    | 892                        | 121    |
| Pondicherry       | person | 563        | 224       | 302       | 106       | 168       | 171       | 161       | 226       | 132       | 129       | 119        | 230    | 173  | 115          | 147  | 177  | 214    | 1665                       | 227    |

Continued

Table (36): Number per 1000 of persons reporting ailment during the last 15 days by mpce class and social group for each sex and State/UT

Rural + Urban

| state / ut | sex    | mpce class |           |           |           |           |           |           |           |           |           |            |        |      | social group |      |      |        | persons reporting ailment* |        |
|------------|--------|------------|-----------|-----------|-----------|-----------|-----------|-----------|-----------|-----------|-----------|------------|--------|------|--------------|------|------|--------|----------------------------|--------|
|            |        | 0 – 235    | 235 – 265 | 265 – 320 | 320 – 365 | 365 – 410 | 410 – 460 | 460 – 520 | 520 – 605 | 605 – 730 | 730 – 980 | 980 – 1285 | 1285 + | all  | ST           | SC   | OBC  | others | estd. no. (00)             | sample |
| (1)        | (2)    | (3)        | (4)       | (5)       | (6)       | (7)       | (8)       | (9)       | (10)      | (11)      | (12)      | (13)       | (14)   | (15) | (16)         | (17) | (18) | (19)   | (20)                       | (21)   |
| ONES       | male   | 174        | 60        | 57        | 58        | 81        | 72        | 78        | 59        | 49        | 73        | 56         | 66     | 66   | 56           | 118  | 51   | 94     | 3374                       | 864    |
|            | female | 126        | 144       | 58        | 66        | 114       | 77        | 90        | 46        | 42        | 63        | 86         | 68     | 68   | 59           | 120  | 60   | 89     | 3274                       | 865    |
|            | person | 150        | 99        | 58        | 62        | 96        | 74        | 84        | 53        | 46        | 68        | 70         | 67     | 67   | 58           | 119  | 55   | 92     | 6647                       | 1729   |
| GUTs       | male   | 341        | 123       | 93        | 72        | 134       | 85        | 133       | 129       | 53        | 61        | 51         | 79     | 83   | 29           | 105  | 129  | 61     | 1114                       | 306    |
|            | female | 448        | 257       | 196       | 115       | 119       | 214       | 100       | 127       | 140       | 71        | 67         | 124    | 121  | 50           | 118  | 196  | 86     | 1368                       | 362    |
|            | person | 386        | 194       | 145       | 96        | 127       | 144       | 116       | 128       | 93        | 65        | 58         | 100    | 101  | 40           | 110  | 161  | 72     | 2481                       | 668    |
| all India  | male   | 66         | 62        | 65        | 69        | 74        | 77        | 83        | 87        | 88        | 107       | 119        | 139    | 85   | 53           | 83   | 82   | 99     | 421022                     | 17741  |
|            | female | 62         | 61        | 70        | 74        | 82        | 84        | 98        | 100       | 104       | 121       | 145        | 181    | 97   | 63           | 93   | 93   | 113    | 453589                     | 18769  |
|            | person | 64         | 62        | 67        | 71        | 78        | 81        | 90        | 93        | 96        | 114       | 132        | 159    | 91   | 58           | 88   | 88   | 106    | 874611                     | 36510  |

\* during the last 15 days

Table (37): Number per 1000 of persons suffering from ailment on the day before the date of survey by sex and age-group

rural

| state / ut       | male              |       |       |       |            |     | female            |       |       |       |            |     | person            |       |       |       |            |     | persons reporting ailment on previous day |             | total persons  |             |
|------------------|-------------------|-------|-------|-------|------------|-----|-------------------|-------|-------|-------|------------|-----|-------------------|-------|-------|-------|------------|-----|-------------------------------------------|-------------|----------------|-------------|
|                  | age group (years) |       |       |       |            |     | age group (years) |       |       |       |            |     | age group (years) |       |       |       |            |     |                                           |             |                |             |
|                  | 0-14              | 15-29 | 30-44 | 45-59 | 60 & above | all | 0-14              | 15-29 | 30-44 | 45-59 | 60 & above | all | 0-14              | 15-29 | 30-44 | 45-59 | 60 & above | all | estd. no. (00)                            | sample (21) | estd. no. (00) | sample (23) |
| Andhra Pradesh   | 38                | 17    | 40    | 98    | 292        | 60  | 31                | 27    | 57    | 109   | 315        | 68  | 35                | 22    | 48    | 103   | 304        | 64  | 33260                                     | 1265        | 520883         | 14285       |
| Chhatisgarh      | 17                | 10    | 8     | 11    | 74         | 16  | 17                | 19    | 0     | 25    | 74         | 18  | 17                | 15    | 5     | 18    | 74         | 17  | 136                                       | 94          | 7871           | 4048        |
| Madhya Pradesh   | 34                | 12    | 18    | 30    | 229        | 35  | 33                | 14    | 25    | 32    | 270        | 37  | 34                | 13    | 21    | 31    | 246        | 36  | 7744                                      | 440         | 215464         | 11828       |
| Uttar Pradesh    | 23                | 8     | 8     | 25    | 123        | 24  | 27                | 11    | 22    | 34    | 114        | 28  | 25                | 10    | 15    | 30    | 119        | 26  | 15905                                     | 679         | 617042         | 20141       |
| West Bengal      | 24                | 19    | 35    | 66    | 110        | 34  | 28                | 28    | 54    | 43    | 107        | 41  | 26                | 24    | 44    | 54    | 108        | 38  | 6585                                      | 277         | 174063         | 5868        |
| Delhi            | 0                 | 0     | 0     | 0     | 0          | 0   | 0                 | 0     | 0     | 0     | 0          | 0   | 0                 | 0     | 0     | 0     | 0          | 0   | 0                                         | 0           | 18376          | 450         |
| Goa              | 150               | 0     | 93    | 50    | 598        | 115 | 44                | 4     | 95    | 60    | 591        | 113 | 92                | 2     | 94    | 54    | 594        | 114 | 1273                                      | 30          | 11210          | 371         |
| Gujarat          | 29                | 20    | 30    | 43    | 283        | 46  | 17                | 29    | 25    | 87    | 198        | 43  | 23                | 24    | 27    | 65    | 241        | 45  | 13777                                     | 455         | 309444         | 8043        |
| Karnataka        | 36                | 22    | 48    | 80    | 188        | 50  | 37                | 50    | 96    | 68    | 181        | 68  | 36                | 35    | 71    | 75    | 184        | 58  | 8402                                      | 340         | 144027         | 4905        |
| Himachal Pradesh | 15                | 23    | 34    | 86    | 236        | 51  | 15                | 28    | 99    | 152   | 236        | 75  | 15                | 26    | 67    | 121   | 236        | 63  | 3343                                      | 494         | 52882          | 6274        |
| Jammu & Kashmir  | 22                | 7     | 26    | 52    | 276        | 41  | 30                | 10    | 36    | 58    | 350        | 47  | 26                | 9     | 31    | 55    | 307        | 44  | 2611                                      | 234         | 59682          | 4785        |
| Jharkhand        | 4                 | 0     | 6     | 9     | 15         | 5   | 4                 | 9     | 6     | 20    | 15         | 8   | 4                 | 4     | 6     | 15    | 15         | 6   | 1199                                      | 71          | 195210         | 7581        |
| Kerala           | 13                | 10    | 17    | 70    | 304        | 42  | 9                 | 11    | 28    | 66    | 229        | 36  | 11                | 11    | 23    | 68    | 268        | 39  | 12875                                     | 511         | 327791         | 9423        |
| Ladakh           | 112               | 62    | 142   | 263   | 486        | 170 | 80                | 87    | 165   | 329   | 518        | 192 | 97                | 76    | 154   | 297   | 504        | 182 | 42544                                     | 1562        | 234249         | 8683        |
| Madhya Pradesh   | 20                | 17    | 26    | 39    | 173        | 32  | 13                | 25    | 50    | 61    | 150        | 37  | 17                | 21    | 37    | 49    | 162        | 35  | 15648                                     | 527         | 452556         | 12942       |
| Maharashtra      | 30                | 16    | 26    | 58    | 252        | 48  | 33                | 25    | 45    | 81    | 259        | 60  | 32                | 21    | 36    | 70    | 256        | 54  | 30280                                     | 903         | 559949         | 13639       |
| Manipur          | 20                | 3     | 9     | 9     | 54         | 13  | 12                | 8     | 13    | 8     | 55         | 12  | 16                | 5     | 11    | 9     | 55         | 13  | 186                                       | 80          | 14473          | 5796        |
| Meghalaya        | 50                | 23    | 1     | 3     | 156        | 34  | 16                | 17    | 10    | 25    | 172        | 23  | 34                | 19    | 5     | 14    | 164        | 29  | 555                                       | 89          | 19056          | 2881        |
| Mizoram          | 17                | 13    | 3     | 12    | 75         | 16  | 26                | 4     | 0     | 0     | 52         | 12  | 22                | 8     | 1     | 6     | 67         | 14  | 55                                        | 26          | 3894           | 2152        |
| Nagaland         | 17                | 0     | 0     | 0     | 100        | 11  | 6                 | 0     | 0     | 22    | 50         | 6   | 12                | 0     | 0     | 11    | 87         | 9   | 36                                        | 21          | 4125           | 1220        |
| Nagaland         | 22                | 17    | 29    | 49    | 105        | 33  | 19                | 19    | 29    | 65    | 109        | 34  | 20                | 18    | 29    | 57    | 107        | 34  | 10166                                     | 378         | 302260         | 10356       |
| Punjab           | 46                | 24    | 79    | 98    | 240        | 70  | 37                | 60    | 143   | 227   | 370        | 116 | 42                | 41    | 111   | 158   | 302        | 92  | 14306                                     | 464         | 155189         | 4603        |
| Rajasthan        | 21                | 19    | 36    | 68    | 127        | 34  | 14                | 26    | 64    | 74    | 108        | 39  | 17                | 23    | 50    | 71    | 117        | 37  | 14802                                     | 709         | 403824         | 13432       |
| Uttarakhand      | 42                | 28    | 35    | 80    | 189        | 50  | 22                | 1     | 28    | 9     | 120        | 21  | 32                | 14    | 32    | 50    | 156        | 36  | 138                                       | 92          | 3859           | 2178        |
| Tamil Nadu       | 26                | 14    | 35    | 94    | 258        | 55  | 21                | 28    | 82    | 72    | 241        | 63  | 24                | 22    | 59    | 82    | 249        | 59  | 23601                                     | 756         | 396832         | 10388       |
| Tripura          | 74                | 17    | 34    | 45    | 120        | 48  | 51                | 11    | 32    | 60    | 157        | 42  | 64                | 14    | 33    | 53    | 135        | 45  | 1180                                      | 179         | 26222          | 3821        |

Continued

Table (37): Number per 1000 of persons suffering from ailment on the day before the date of survey by sex and age-group

| state / ut       | male              |        |        |        |            |         | female            |        |        |        |            |         | person            |         |         |        |            |         | persons reporting ailment on previous day |               | total persons  |               |
|------------------|-------------------|--------|--------|--------|------------|---------|-------------------|--------|--------|--------|------------|---------|-------------------|---------|---------|--------|------------|---------|-------------------------------------------|---------------|----------------|---------------|
|                  | age group (years) |        |        |        |            |         | age group (years) |        |        |        |            |         | age group (years) |         |         |        |            |         | estd. no. (00)                            | sam- ple (21) | estd. no. (00) | sam- ple (23) |
|                  | 0-14              | 15-29  | 30-44  | 45-59  | 60 & above | all     | 0-14              | 15-29  | 30-44  | 45-59  | 60 & above | all     | 0-14              | 15-29   | 30-44   | 45-59  | 60 & above | all     |                                           |               |                |               |
| (2)              | (3)               | (4)    | (5)    | (6)    | (7)        | (8)     | (9)               | (10)   | (11)   | (12)   | (13)       | (14)    | (15)              | (16)    | (17)    | (18)   | (19)       | (20)    | (21)                                      | (22)          | (23)           |               |
| Andhra Pradesh   | 17                | 38     | 11     | 22     | 91         | 27      | 1                 | 32     | 45     | 19     | 68         | 25      | 10                | 35      | 28      | 21     | 80         | 26      | 1628                                      | 77            | 63340          | 1708          |
| Assam            | 42                | 28     | 61     | 86     | 220        | 58      | 34                | 49     | 84     | 107    | 204        | 65      | 38                | 38      | 72      | 96     | 212        | 61      | 78714                                     | 2892          | 1289072        | 41352         |
| Bihar            | 53                | 36     | 66     | 110    | 263        | 72      | 49                | 37     | 68     | 102    | 299        | 73      | 51                | 37      | 67      | 106    | 281        | 72      | 42258                                     | 1263          | 585873         | 16203         |
| Chhattisgarh     | 10                | 0      | 23     | 62     | 250        | 32      | 48                | 23     | 16     | 87     | 119        | 42      | 26                | 12      | 20      | 72     | 202        | 36      | 82                                        | 26            | 2270           | 711           |
| Daman & Diu      | 1                 | 4      | 13     | 15     | 160        | 9       | 96                | 4      | 36     | 58     | 127        | 56      | 49                | 4       | 22      | 33     | 143        | 28      | 26                                        | 28            | 901            | 370           |
| Delhi            | 0                 | 0      | 0      | 0      | 13         | 1       | 22                | 16     | 0      | 0      | 95         | 15      | 11                | 8       | 0       | 0      | 39         | 8       | 18                                        | 5             | 2281           | 430           |
| Goa              | 0                 | 1      | 0      | 0      | 0          | 1       | 34                | 0      | 0      | 263    | 71         | 24      | 16                | 1       | 0       | 127    | 54         | 9       | 9                                         | 7             | 992            | 341           |
| Gujarat          | 12                | 31     | 49     | 54     | 380        | 55      | 59                | 12     | 49     | 330    | 610        | 113     | 37                | 21      | 49      | 186    | 504        | 85      | 20                                        | 47            | 241            | 448           |
| Haryana          | 128               | 67     | 55     | 34     | 532        | 120     | 101               | 0      | 44     | 58     | 724        | 114     | 117               | 38      | 50      | 47     | 624        | 117     | 386                                       | 45            | 3299           | 322           |
| Himachal Pradesh | 45                | 14     | 16     | 24     | 111        | 32      | 25                | 11     | 16     | 34     | 127        | 25      | 35                | 13      | 16      | 29     | 118        | 29      | 2285                                      | 581           | 79499          | 22096         |
| Jammu & Kashmir  | 45                | 20     | 26     | 29     | 325        | 48      | 60                | 10     | 26     | 64     | 470        | 61      | 52                | 16      | 26      | 46     | 388        | 54      | 541                                       | 158           | 9985           | 2622          |
| Karnataka        | 33                | 21     | 40     | 76     | 224        | 50      | 28                | 31     | 60     | 91     | 229        | 57      | 31                | 26      | 50      | 83     | 226        | 53      | 383746                                    | 15066         | 7178701        | 251978        |
| Kerala           | 45352             | 18740  | 27921  | 32099  | 58419      | 182531  | 35485             | 28146  | 41340  | 38077  | 58167      | 201215  | 80837             | 46886   | 69260   | 70177  | 116586     | 383746  | X                                         | X             | X              | X             |
| Madhya Pradesh   | 1505              | 837    | 1050   | 1271   | 2757       | 7420    | 1125              | 1004   | 1417   | 1543   | 2557       | 7646    | 2630              | 1841    | 2467    | 2814   | 5314       | 15066   | X                                         | X             | X              | X             |
| Madras           | 1373037           | 908479 | 690923 | 424407 | 260664     | 3657509 | 1256497           | 900801 | 689161 | 420608 | 254124     | 3521192 | 2629534           | 1809280 | 1380084 | 845015 | 514787     | 7178701 | X                                         | X             | X              | X             |
| Mizoram          | 45943             | 33016  | 23467  | 14369  | 11834      | 128629  | 41673             | 32360  | 22896  | 15486  | 10934      | 123349  | 87616             | 65376   | 46363   | 29855  | 22768      | 251978  | X                                         | X             | X              | X             |

Table (37): Number per 1000 of persons suffering from ailment on the day before the date of survey by sex and age-group

Urban

| state / ut       | male              |       |       |       |            |     | female            |       |       |       |            |     | person            |       |       |       |            |     | persons reporting ailment on previous day |             | total persons  |             |
|------------------|-------------------|-------|-------|-------|------------|-----|-------------------|-------|-------|-------|------------|-----|-------------------|-------|-------|-------|------------|-----|-------------------------------------------|-------------|----------------|-------------|
|                  | age group (years) |       |       |       |            |     | age group (years) |       |       |       |            |     | age group (years) |       |       |       |            |     |                                           |             |                |             |
|                  | 0-14              | 15-29 | 30-44 | 45-59 | 60 & above | all | 0-14              | 15-29 | 30-44 | 45-59 | 60 & above | all | 0-14              | 15-29 | 30-44 | 45-59 | 60 & above | all | estd. no. (00)                            | sample (21) | estd. no. (00) | sample (23) |
| Andhra Pradesh   | 39                | 19    | 52    | 114   | 460        | 67  | 34                | 33    | 39    | 176   | 496        | 82  | 37                | 26    | 46    | 145   | 480        | 74  | 14700                                     | 898         | 197699         | 8195        |
| Chandigarh       | 61                | 31    | 11    | 3     | 29         | 35  | 61                | 20    | 54    | 0     | 43         | 45  | 61                | 25    | 31    | 2     | 35         | 40  | 40                                        | 37          | 1016           | 1572        |
| Assam            | 30                | 14    | 26    | 54    | 237        | 39  | 20                | 23    | 39    | 38    | 242        | 39  | 26                | 18    | 32    | 47    | 239        | 39  | 886                                       | 90          | 22636          | 2322        |
| Bihar            | 10                | 24    | 17    | 106   | 177        | 38  | 6                 | 7     | 36    | 45    | 189        | 28  | 8                 | 16    | 26    | 77    | 182        | 33  | 2425                                      | 155         | 73097          | 3800        |
| Chhattisgarh     | 19                | 1     | 15    | 105   | 135        | 30  | 11                | 10    | 47    | 136   | 140        | 42  | 15                | 5     | 31    | 119   | 138        | 36  | 1017                                      | 97          | 28419          | 2077        |
| Delhi            | 2                 | 3     | 5     | 4     | 115        | 8   | 1                 | 2     | 8     | 3     | 104        | 8   | 2                 | 3     | 6     | 3     | 110        | 8   | 796                                       | 72          | 99289          | 4761        |
| Goa              | 27                | 3     | 94    | 11    | 113        | 36  | 13                | 36    | 18    | 102   | 369        | 71  | 21                | 18    | 53    | 55    | 252        | 53  | 296                                       | 35          | 5575           | 535         |
| Gujarat          | 33                | 20    | 45    | 83    | 351        | 56  | 31                | 23    | 62    | 109   | 260        | 62  | 32                | 21    | 53    | 95    | 303        | 59  | 9327                                      | 497         | 158711         | 6594        |
| Karnataka        | 15                | 37    | 40    | 107   | 244        | 50  | 19                | 36    | 87    | 105   | 239        | 65  | 17                | 36    | 62    | 106   | 241        | 57  | 2746                                      | 210         | 48126          | 2904        |
| Himachal Pradesh | 38                | 2     | 8     | 52    | 304        | 35  | 29                | 32    | 78    | 74    | 249        | 57  | 33                | 17    | 43    | 63    | 275        | 46  | 265                                       | 70          | 5752           | 904         |
| Jammu & Kashmir  | 47                | 23    | 16    | 102   | 281        | 56  | 29                | 17    | 28    | 133   | 297        | 53  | 37                | 20    | 22    | 116   | 288        | 55  | 742                                       | 137         | 13578          | 2014        |
| Jharkhand        | 6                 | 1     | 6     | 16    | 55         | 9   | 4                 | 14    | 14    | 39    | 75         | 19  | 5                 | 7     | 10    | 27    | 65         | 14  | 540                                       | 51          | 39035          | 3410        |
| Karnataka        | 15                | 16    | 15    | 65    | 276        | 37  | 16                | 7     | 41    | 66    | 349        | 47  | 16                | 12    | 28    | 65    | 313        | 42  | 5718                                      | 456         | 136791         | 7624        |
| Kerala           | 129               | 52    | 79    | 228   | 487        | 153 | 115               | 84    | 104   | 261   | 534        | 178 | 122               | 68    | 92    | 245   | 513        | 166 | 13622                                     | 786         | 81932          | 4720        |
| Ladakh           | 37                | 12    | 23    | 49    | 194        | 36  | 31                | 19    | 35    | 92    | 182        | 45  | 34                | 15    | 29    | 69    | 188        | 40  | 5916                                      | 382         | 146839         | 7141        |
| Maharashtra      | 57                | 33    | 43    | 136   | 383        | 79  | 32                | 22    | 78    | 161   | 408        | 85  | 45                | 28    | 60    | 148   | 396        | 82  | 31014                                     | 1231        | 378789         | 13048       |
| Manipur          | 24                | 1     | 8     | 2     | 39         | 12  | 18                | 9     | 25    | 14    | 67         | 20  | 21                | 5     | 18    | 8     | 53         | 16  | 87                                        | 50          | 5611           | 2845        |
| Meghalaya        | 7                 | 2     | 3     | 6     | 34         | 5   | 37                | 29    | 8     | 79    | 137        | 37  | 23                | 18    | 6     | 40    | 94         | 22  | 63                                        | 33          | 2825           | 1202        |
| Mizoram          | 5                 | 3     | 2     | 1     | 65         | 7   | 17                | 4     | 5     | 8     | 85         | 12  | 11                | 4     | 3     | 5     | 73         | 10  | 27                                        | 56          | 2847           | 3247        |
| Nagaland         | 30                | 0     | 0     | 7     | 32         | 15  | 63                | 0     | 0     | 0     | 0          | 22  | 44                | 0     | 0     | 4     | 29         | 18  | 44                                        | 13          | 2415           | 595         |
| Nagaland         | 21                | 4     | 32    | 53    | 129        | 30  | 35                | 5     | 13    | 65    | 132        | 30  | 28                | 4     | 24    | 59    | 130        | 30  | 1221                                      | 103         | 40544          | 2726        |
| Punjab           | 42                | 47    | 69    | 91    | 243        | 68  | 35                | 19    | 78    | 173   | 317        | 75  | 39                | 34    | 73    | 129   | 278        | 71  | 5454                                      | 288         | 76302          | 3458        |
| Rajasthan        | 43                | 9     | 46    | 71    | 265        | 50  | 31                | 31    | 96    | 64    | 216        | 60  | 38                | 20    | 72    | 68    | 240        | 55  | 5738                                      | 432         | 104919         | 5922        |
| Uttarakhand      | 4                 | 14    | 0     | 0     | 29         | 8   | 16                | 14    | 0     | 33    | 262        | 18  | 10                | 14    | 0     | 10    | 122        | 13  | 7                                         | 13          | 580            | 380         |
| Tamil Nadu       | 22                | 15    | 35    | 114   | 288        | 56  | 24                | 17    | 37    | 102   | 332        | 63  | 23                | 16    | 36    | 108   | 311        | 60  | 12840                                     | 865         | 215244         | 10991       |
| Tripura          | 38                | 18    | 16    | 26    | 100        | 29  | 20                | 32    | 30    | 3     | 54         | 26  | 30                | 25    | 23    | 14    | 76         | 28  | 117                                       | 43          | 4253           | 1023        |

Continued

Table (37): Number per 1000 of persons suffering from ailment on the day before the date of survey by sex and age-group

Urban

| state / ut                                | male              |        |        |        |            |         | female            |        |        |        |            |         | person            |        |        |        |            |         | persons reporting ailment on previous day |               | total persons  |               |
|-------------------------------------------|-------------------|--------|--------|--------|------------|---------|-------------------|--------|--------|--------|------------|---------|-------------------|--------|--------|--------|------------|---------|-------------------------------------------|---------------|----------------|---------------|
|                                           | age group (years) |        |        |        |            |         | age group (years) |        |        |        |            |         | age group (years) |        |        |        |            |         | estd. no. (00)                            | sam- ple (00) | estd. no. (00) | sam- ple (00) |
|                                           | 0-14              | 15-29  | 30-44  | 45-59  | 60 & above | all     | 0-14              | 15-29  | 30-44  | 45-59  | 60 & above | all     | 0-14              | 15-29  | 30-44  | 45-59  | 60 & above | all     |                                           |               |                |               |
| (2)                                       | (3)               | (4)    | (5)    | (6)    | (7)        | (8)     | (9)               | (10)   | (11)   | (12)   | (13)       | (14)    | (15)              | (16)   | (17)   | (18)   | (19)       | (20)    | (21)                                      | (22)          | (23)           |               |
| Andhra Pradesh                            | 52                | 3      | 19     | 40     | 314        | 46      | 17                | 27     | 61     | 111    | 145        | 54      | 38                | 15     | 39     | 77     | 221        | 50      | 847                                       | 81            | 17021          | 946           |
| Assam                                     | 34                | 34     | 46     | 113    | 247        | 57      | 33                | 48     | 98     | 181    | 300        | 82      | 34                | 40     | 72     | 143    | 274        | 69      | 23132                                     | 1235          | 336625         | 15162         |
| Bihar                                     | 74                | 36     | 65     | 96     | 421        | 98      | 56                | 57     | 99     | 212    | 498        | 132     | 65                | 47     | 81     | 150    | 458        | 114     | 21129                                     | 1009          | 185135         | 8837          |
| Chhattisgarh                              | 5                 | 0      | 11     | 103    | 193        | 22      | 12                | 18     | 14     | 36     | 101        | 19      | 8                 | 9      | 12     | 73     | 152        | 21      | 21                                        | 27            | 1034           | 545           |
| Daman & Diu                               | 17                | 9      | 14     | 54     | 144        | 28      | 31                | 55     | 37     | 62     | 265        | 60      | 24                | 29     | 24     | 58     | 198        | 42      | 269                                       | 107           | 6402           | 1447          |
| Delhi                                     | 30                | 9      | 0      | 0      | 9          | 13      | 0                 | 0      | 0      | 0      | 86         | 3       | 18                | 6      | 0      | 0      | 45         | 9       | 2                                         | 4             | 269            | 355           |
| Goa                                       | 0                 | 0      | 0      | 165    | 201        | 27      | 13                | 14     | 4      | 0      | 55         | 13      | 6                 | 5      | 2      | 90     | 111        | 21      | 8                                         | 12            | 384            | 389           |
| Gujarat                                   | 59                | 0      | 70     | 137    | 451        | 77      | 30                | 49     | 51     | 231    | 487        | 96      | 45                | 25     | 59     | 180    | 471        | 87      | 25                                        | 47            | 286            | 520           |
| Haryana                                   | 53                | 41     | 30     | 226    | 579        | 109     | 88                | 43     | 91     | 364    | 680        | 190     | 69                | 42     | 57     | 292    | 641        | 148     | 936                                       | 137           | 6321           | 866           |
| Himachal Pradesh                          | 25                | 7      | 7      | 9      | 56         | 15      | 31                | 17     | 19     | 17     | 76         | 24      | 28                | 13     | 13     | 13     | 65         | 20      | 386                                       | 245           | 19546          | 10864         |
| Jammu & Kashmir                           | 34                | 19     | 20     | 128    | 362        | 61      | 54                | 45     | 57     | 189    | 524        | 114     | 43                | 31     | 36     | 156    | 452        | 86      | 1261                                      | 334           | 14695          | 4122          |
| Karnataka                                 | 38                | 24     | 41     | 100    | 312        | 60      | 32                | 28     | 63     | 134    | 342        | 73      | 35                | 26     | 52     | 116    | 327        | 66      | 162021                                    | 9759          | 2446300        | 133077        |
| Kerala                                    | 14395             | 8878   | 11066  | 16712  | 25166      | 76217   | 10727             | 9542   | 16419  | 20321  | 28795      | 85803   | 25122             | 18419  | 27485  | 37033  | 53961      | 162021  | X                                         | X             | X              | X             |
| Madhya Pradesh                            | 760               | 464    | 605    | 908    | 1850       | 4587    | 586               | 575    | 811    | 1141   | 2059       | 5172    | 1346              | 1039   | 1416   | 2049   | 3909       | 9759    | X                                         | X             | X              | X             |
| Madhya Pradesh (std. no. of persons (00)) | 380698            | 376633 | 271398 | 167236 | 80686      | 1276650 | 339616            | 335668 | 259117 | 151140 | 84109      | 1169650 | 720314            | 712301 | 530515 | 318376 | 164795     | 2446300 | X                                         | X             | X              | X             |
| Madhya Pradesh (sample persons)           | 20212             | 19004  | 14366  | 8134   | 6354       | 68070   | 18332             | 18629  | 12974  | 8625   | 6447       | 65007   | 38544             | 37633  | 27340  | 16759  | 12801      | 133077  | X                                         | X             | X              | X             |

Table (37): Number per 1000 of persons suffering from ailment on the day before the date of survey by sex and age-group

| state / ut       | male              |       |       |       |            |     | female            |       |       |       |            |      | person            |       |       |       |            |      | persons reporting ailment on previous day |         | total persons  |         |
|------------------|-------------------|-------|-------|-------|------------|-----|-------------------|-------|-------|-------|------------|------|-------------------|-------|-------|-------|------------|------|-------------------------------------------|---------|----------------|---------|
|                  | age group (years) |       |       |       |            |     | age group (years) |       |       |       |            |      | age group (years) |       |       |       |            |      | estd. no. (00)                            | sam-ple | estd. no. (00) | sam-ple |
|                  | 0-14              | 15-29 | 30-44 | 45-59 | 60 & above | all | 0-14              | 15-29 | 30-44 | 45-59 | 60 & above | all  | 0-14              | 15-29 | 30-44 | 45-59 | 60 & above | all  |                                           |         |                |         |
| (2)              | (3)               | (4)   | (5)   | (6)   | (7)        | (8) | (9)               | (10)  | (11)  | (12)  | (13)       | (14) | (15)              | (16)  | (17)  | (18)  | (19)       | (20) | (21)                                      | (22)    | (23)           |         |
| Andhra Pradesh   | 38                | 18    | 43    | 102   | 329        | 62  | 32                | 29    | 52    | 125   | 358        | 72   | 35                | 23    | 48    | 113   | 344        | 67   | 47961                                     | 2163    | 718581         | 22480   |
| Chhatisgarh      | 22                | 12    | 9     | 11    | 72         | 19  | 22                | 19    | 8     | 23    | 73         | 21   | 22                | 16    | 9     | 16    | 73         | 20   | 176                                       | 131     | 8886           | 5620    |
| Madhya Pradesh   | 34                | 12    | 19    | 32    | 230        | 36  | 32                | 15    | 27    | 33    | 267        | 37   | 33                | 14    | 23    | 33    | 245        | 36   | 8630                                      | 530     | 238101         | 14150   |
| Bihar            | 22                | 10    | 9     | 36    | 129        | 25  | 26                | 11    | 23    | 35    | 122        | 28   | 24                | 11    | 16    | 36    | 126        | 27   | 18330                                     | 834     | 690139         | 23941   |
| Uttar Pradesh    | 23                | 16    | 32    | 73    | 113        | 34  | 26                | 25    | 53    | 56    | 111        | 41   | 24                | 20    | 42    | 65    | 112        | 38   | 7602                                      | 374     | 202482         | 7945    |
| Delhi            | 2                 | 3     | 4     | 3     | 100        | 7   | 0                 | 2     | 7     | 3     | 91         | 7    | 1                 | 2     | 6     | 3     | 95         | 7    | 796                                       | 72      | 117665         | 5211    |
| Goa              | 103               | 1     | 93    | 36    | 447        | 88  | 34                | 17    | 75    | 76    | 523        | 99   | 67                | 8     | 83    | 55    | 488        | 93   | 1569                                      | 65      | 16785          | 906     |
| Gujarat          | 30                | 20    | 36    | 57    | 303        | 49  | 21                | 27    | 38    | 94    | 219        | 49   | 26                | 23    | 37    | 75    | 261        | 49   | 23104                                     | 952     | 468155         | 14637   |
| Karnataka        | 31                | 26    | 46    | 88    | 198        | 50  | 33                | 47    | 94    | 78    | 195        | 67   | 32                | 36    | 69    | 83    | 196        | 58   | 11147                                     | 550     | 192154         | 7809    |
| Himachal Pradesh | 17                | 21    | 31    | 84    | 240        | 49  | 17                | 28    | 97    | 148   | 237        | 73   | 17                | 25    | 64    | 118   | 238        | 62   | 3608                                      | 564     | 58634          | 7178    |
| Jammu & Kashmir  | 26                | 11    | 24    | 63    | 277        | 44  | 30                | 12    | 34    | 74    | 341        | 48   | 28                | 11    | 29    | 68    | 304        | 46   | 3353                                      | 371     | 73260          | 6799    |
| Jharkhand        | 4                 | 0     | 6     | 11    | 22         | 5   | 4                 | 10    | 7     | 24    | 29         | 10   | 4                 | 5     | 7     | 17    | 25         | 7    | 1739                                      | 122     | 234245         | 10991   |
| Kerala           | 14                | 12    | 17    | 69    | 297        | 41  | 11                | 10    | 32    | 66    | 262        | 39   | 12                | 11    | 24    | 67    | 280        | 40   | 18593                                     | 967     | 464582         | 17047   |
| Lakshadweep      | 116               | 59    | 125   | 253   | 486        | 166 | 89                | 86    | 149   | 309   | 522        | 188  | 103               | 74    | 138   | 282   | 506        | 178  | 56166                                     | 2348    | 316181         | 13403   |
| Madhya Pradesh   | 24                | 16    | 25    | 41    | 178        | 33  | 17                | 24    | 46    | 69    | 158        | 39   | 20                | 20    | 35    | 54    | 168        | 36   | 21564                                     | 909     | 599395         | 20083   |
| Maharashtra      | 40                | 24    | 33    | 93    | 299        | 61  | 33                | 24    | 59    | 113   | 312        | 70   | 36                | 24    | 46    | 103   | 306        | 65   | 61294                                     | 2134    | 938738         | 26687   |
| Manipur          | 21                | 2     | 9     | 7     | 49         | 13  | 14                | 8     | 16    | 9     | 60         | 14   | 17                | 5     | 13    | 8     | 54         | 14   | 273                                       | 130     | 20084          | 8641    |
| Mizoram          | 46                | 19    | 1     | 3     | 146        | 31  | 18                | 19    | 10    | 35    | 168        | 25   | 33                | 19    | 5     | 18    | 157        | 28   | 618                                       | 122     | 21881          | 4083    |
| Nagaland         | 12                | 9     | 2     | 7     | 71         | 12  | 22                | 4     | 2     | 4     | 67         | 12   | 17                | 6     | 2     | 5     | 69         | 12   | 82                                        | 82      | 6741           | 5399    |
| Odisha           | 22                | 0     | 0     | 2     | 74         | 13  | 26                | 0     | 0     | 15    | 42         | 12   | 24                | 0     | 0     | 8     | 67         | 12   | 81                                        | 34      | 6540           | 1815    |
| Rajasthan        | 22                | 15    | 29    | 49    | 108        | 33  | 20                | 17    | 27    | 65    | 111        | 34   | 21                | 16    | 28    | 58    | 109        | 33   | 11387                                     | 481     | 342804         | 13082   |
| Punjab           | 45                | 32    | 76    | 95    | 241        | 69  | 37                | 46    | 122   | 208   | 356        | 103  | 41                | 39    | 98    | 148   | 296        | 85   | 19761                                     | 752     | 231492         | 8061    |
| Uttar Pradesh    | 24                | 17    | 39    | 69    | 155        | 38  | 17                | 27    | 71    | 72    | 128        | 43   | 21                | 22    | 55    | 70    | 141        | 40   | 20540                                     | 1141    | 508743         | 19354   |
| West Bengal      | 38                | 26    | 32    | 69    | 176        | 44  | 21                | 3     | 23    | 11    | 129        | 20   | 29                | 14    | 27    | 45    | 153        | 33   | 145                                       | 105     | 4438           | 2558    |
| Tamil Nadu       | 24                | 14    | 35    | 101   | 268        | 56  | 22                | 25    | 66    | 82    | 272        | 63   | 23                | 20    | 51    | 91    | 270        | 60   | 36441                                     | 1621    | 612076         | 21379   |
| Tripura          | 70                | 17    | 31    | 42    | 117        | 45  | 48                | 15    | 32    | 52    | 140        | 39   | 60                | 16    | 32    | 47    | 127        | 43   | 1297                                      | 222     | 30475          | 4844    |

Continued



Table (37): Number per 1000 of persons suffering from ailment on the day before the date of survey by sex and age-group

| state / ut                           | male              |         |        |        |            |         | female            |         |        |        |            |         | person            |         |         |         |            |         | persons reporting ailment on previous day |              | total persons  |              |
|--------------------------------------|-------------------|---------|--------|--------|------------|---------|-------------------|---------|--------|--------|------------|---------|-------------------|---------|---------|---------|------------|---------|-------------------------------------------|--------------|----------------|--------------|
|                                      | age group (years) |         |        |        |            |         | age group (years) |         |        |        |            |         | age group (years) |         |         |         |            |         | estd. no. (00)                            | sam-ple (00) | estd. no. (00) | sam-ple (00) |
|                                      | 0-14              | 15-29   | 30-44  | 45-59  | 60 & above | all     | 0-14              | 15-29   | 30-44  | 45-59  | 60 & above | all     | 0-14              | 15-29   | 30-44   | 45-59   | 60 & above | all     |                                           |              |                |              |
|                                      | (2)               | (3)     | (4)    | (5)    | (6)        | (7)     | (8)               | (9)     | (10)   | (11)   | (12)       | (13)    | (14)              | (15)    | (16)    | (17)    | (18)       | (19)    | (20)                                      | (21)         | (22)           | (23)         |
| Andhra Pradesh                       | 22                | 29      | 13     | 27     | 129        | 31      | 3                 | 31      | 49     | 40     | 87         | 31      | 15                | 30      | 31      | 34      | 109        | 31      | 2475                                      | 158          | 80361          | 2654         |
| Assam                                | 41                | 29      | 58     | 93     | 224        | 57      | 34                | 49      | 87     | 123    | 222        | 68      | 37                | 39      | 72      | 107     | 223        | 63      | 101847                                    | 4127         | 1625696        | 56514        |
| Bihar                                | 57                | 36      | 66     | 106    | 314        | 78      | 50                | 42      | 76     | 133    | 359        | 87      | 53                | 39      | 71      | 119     | 337        | 82      | 63387                                     | 2272         | 771007         | 25040        |
| Chhattisgarh                         | 9                 | 0       | 18     | 72     | 239        | 29      | 37                | 22      | 15     | 73     | 114        | 34      | 22                | 11      | 17      | 72      | 191        | 31      | 104                                       | 53           | 3303           | 1256         |
| Daman & Diu                          | 14                | 8       | 13     | 51     | 144        | 25      | 45                | 50      | 37     | 62     | 258        | 59      | 29                | 26      | 24      | 56      | 196        | 40      | 295                                       | 135          | 7304           | 1817         |
| Delhi                                | 4                 | 1       | 0      | 0      | 13         | 2       | 20                | 15      | 0      | 0      | 94         | 14      | 12                | 8       | 0       | 0       | 40         | 8       | 21                                        | 9            | 2550           | 785          |
| Goa                                  | 0                 | 1       | 0      | 90     | 142        | 7       | 26                | 3       | 2      | 127    | 62         | 20      | 12                | 2       | 1       | 107     | 88         | 12      | 16                                        | 19           | 1376           | 730          |
| Gujarat                              | 40                | 14      | 59     | 101    | 418        | 67      | 43                | 31      | 50     | 276    | 544        | 104     | 42                | 23      | 54      | 183     | 487        | 86      | 45                                        | 94           | 527            | 968          |
| Haryana                              | 81                | 51      | 39     | 176    | 559        | 113     | 92                | 30      | 72     | 264    | 692        | 164     | 86                | 40      | 54      | 220     | 636        | 137     | 1321                                      | 182          | 9620           | 1188         |
| Himachal Pradesh                     | 41                | 13      | 14     | 21     | 101        | 29      | 26                | 13      | 17     | 30     | 117        | 25      | 34                | 13      | 15      | 25      | 108        | 27      | 2672                                      | 826          | 99045          | 32960        |
| Jammu & Kashmir                      | 39                | 20      | 23     | 97     | 346        | 56      | 56                | 31      | 44     | 148    | 507        | 93      | 47                | 25      | 32      | 121     | 428        | 73      | 1802                                      | 492          | 24681          | 6744         |
| Karnataka                            | 34                | 21      | 41     | 83     | 245        | 52      | 29                | 30      | 61     | 102    | 257        | 61      | 32                | 26      | 51      | 92      | 251        | 57      | 545767                                    | 24825        | 9625001        | 385055       |
| Kerala                               | 59747             | 27618   | 38987  | 48812  | 83585      | 258748  | 46212             | 37688   | 57759  | 58398  | 86962      | 287019  | 105959            | 65305   | 96746   | 107210  | 170547     | 545767  | X                                         | X            | X              | X            |
| Madhya Pradesh                       | 2265              | 1301    | 1655   | 2179   | 4607       | 12007   | 1711              | 1579    | 2228   | 2684   | 4616       | 12818   | 3976              | 2880    | 3883    | 4863    | 9223       | 24825   | X                                         | X            | X              | X            |
| Madhya Pradesh (std. no. of persons) | 1753735           | 1285112 | 962321 | 591642 | 341349     | 4934159 | 1596113           | 1236469 | 948278 | 571748 | 338233     | 4690841 | 3349848           | 2521581 | 1910599 | 1163390 | 679582     | 9625001 | X                                         | X            | X              | X            |
| Madhya Pradesh (sample persons)      | 66155             | 52020   | 37833  | 22503  | 18188      | 196699  | 60005             | 50989   | 35870  | 24111  | 17381      | 188356  | 126160            | 103009  | 73703   | 46614   | 35569      | 385055  | X                                         | X            | X              | X            |

Table (38): Number of persons per 1,00,000 reporting onset of ailments during last 15 days and average duration of ailment by sex and age-group

| All-India                                                  |                                               |         |         |                                           |        |         | Rural                                                  |        |                |        |
|------------------------------------------------------------|-----------------------------------------------|---------|---------|-------------------------------------------|--------|---------|--------------------------------------------------------|--------|----------------|--------|
| age-group                                                  | incidence rate of ailment during last 15 days |         |         | average duration of ailment in days (0.0) |        |         | persons reporting onset of ailment during last 15 days |        | all persons    |        |
|                                                            | male                                          | female  | persons | male                                      | female | persons | estd. no. (00)                                         | sample | estd. no. (00) | sample |
| (1)                                                        | (2)                                           | (3)     | (4)     | (5)                                       | (6)    | (7)     | (8)                                                    | (9)    | (10)           | (11)   |
| 0 – 4                                                      | 9671                                          | 8833    | 9259    | 7.7                                       | 5.4    | 6.6     | 79417                                                  | 2383   | 857690         | 28189  |
| 5 – 9                                                      | 4407                                          | 3779    | 4107    | 10.7                                      | 6.3    | 8.8     | 37742                                                  | 1111   | 918975         | 30709  |
| 10 – 14                                                    | 3197                                          | 2632    | 2934    | 10.0                                      | 13.3   | 11.4    | 25025                                                  | 734    | 852869         | 28718  |
| 5 – 14                                                     | 5678                                          | 5111    | 5407    | 8.9                                       | 6.9    | 8.0     | 142184                                                 | 4228   | 2629534        | 87616  |
| 15 – 19                                                    | 2837                                          | 3177    | 2994    | 6.5                                       | 8.8    | 7.6     | 19424                                                  | 592    | 648792         | 23587  |
| 20 – 24                                                    | 2258                                          | 3153    | 2725    | 16.9                                      | 19.4   | 18.4    | 16037                                                  | 518    | 588414         | 21533  |
| 25 – 29                                                    | 2280                                          | 3646    | 2982    | 6.6                                       | 10.5   | 9.0     | 17057                                                  | 529    | 572075         | 20256  |
| 15 – 29                                                    | 2487                                          | 3322    | 2903    | 9.5                                       | 12.8   | 11.4    | 52518                                                  | 1639   | 1809280        | 65376  |
| 30 – 34                                                    | 2888                                          | 4026    | 3489    | 25.0                                      | 7.5    | 14.4    | 18089                                                  | 544    | 518521         | 17695  |
| 35 – 39                                                    | 2837                                          | 4160    | 3479    | 15.4                                      | 18.7   | 17.3    | 16735                                                  | 487    | 481044         | 16063  |
| 40 – 44                                                    | 3812                                          | 5107    | 4432    | 53.3                                      | 13.4   | 31.3    | 16864                                                  | 445    | 380519         | 12605  |
| 30 – 44                                                    | 3135                                          | 4357    | 3745    | 31.8                                      | 13.0   | 20.9    | 51688                                                  | 1476   | 1380084        | 46363  |
| 45 – 49                                                    | 4197                                          | 4946    | 4552    | 17.7                                      | 26.8   | 22.4    | 14638                                                  | 435    | 321561         | 10882  |
| 50 – 54                                                    | 4003                                          | 5450    | 4741    | 8.3                                       | 25.3   | 18.2    | 12178                                                  | 371    | 256843         | 9070   |
| 55 – 59                                                    | 4012                                          | 5272    | 4660    | 15.8                                      | 16.8   | 16.3    | 12424                                                  | 426    | 266611         | 9903   |
| 45 – 59                                                    | 4083                                          | 5209    | 4644    | 14.4                                      | 23.0   | 19.2    | 39240                                                  | 1232   | 845015         | 29855  |
| 60 & above                                                 | 6516                                          | 7022    | 6766    | 38.3                                      | 46.1   | 42.3    | 34828                                                  | 1527   | 514787         | 22768  |
| 15 & above                                                 | 3439                                          | 4403    | 3919    | 23.0                                      | 21.2   | 22.0    | 178275                                                 | 5874   | 4549167        | 164362 |
| all ages                                                   | 4280                                          | 4655    | 4464    | 16                                        | 15.6   | 15.8    | 320459                                                 | 10102  | 7178701        | 251978 |
| estd. no. of persons rep. ailment during last 15 days (00) | 156534                                        | 163925  | 320459  | X                                         | X      | X       | X                                                      | X      | X              | X      |
| sample persons rep. ailment during last 15 days            | 4963                                          | 5139    | 10102   | X                                         | X      | X       | X                                                      | X      | X              | X      |
| estd. no. of persons(00)                                   | 3657509                                       | 3521192 | 7178701 | X                                         | X      | X       | X                                                      | X      | X              | X      |
| sample persons                                             | 128629                                        | 123349  | 251978  | X                                         | X      | X       | X                                                      | X      | X              | X      |

Table (38): Number of persons per 1,00,000 reporting onset of ailments during last 15 days and average duration of ailment by sex and age-group

| All-India                                                  |                                               |         |         |                                           |        |         |                                                        |        |                |        | Urban |
|------------------------------------------------------------|-----------------------------------------------|---------|---------|-------------------------------------------|--------|---------|--------------------------------------------------------|--------|----------------|--------|-------|
| age-group                                                  | incidence rate of ailment during last 15 days |         |         | average duration of ailment in days (0.0) |        |         | persons reporting onset of ailment during last 15 days |        | all persons    |        |       |
|                                                            | male                                          | female  | persons | male                                      | female | persons | estd. no. (00)                                         | sample | estd. no. (00) | sample |       |
| (1)                                                        | (2)                                           | (3)     | (4)     | (5)                                       | (6)    | (7)     | (8)                                                    | (9)    | (10)           | (11)   |       |
| 0 – 4                                                      | 10703                                         | 9779    | 10277   | 6.2                                       | 5.2    | 5.8     | 22085                                                  | 1204   | 214896         | 13137  |       |
| 5 – 9                                                      | 5684                                          | 4424    | 5080    | 8.1                                       | 7.6    | 7.9     | 11936                                                  | 526    | 234965         | 12478  |       |
| 10 – 14                                                    | 3207                                          | 2950    | 3086    | 12.3                                      | 14.1   | 13.1    | 8345                                                   | 345    | 270453         | 12929  |       |
| 5 – 14                                                     | 6284                                          | 5431    | 5882    | 8.0                                       | 7.6    | 7.9     | 42367                                                  | 2075   | 720314         | 38544  |       |
| 15 – 19                                                    | 2930                                          | 3132    | 3022    | 5.1                                       | 33.4   | 18.4    | 7728                                                   | 332    | 255743         | 12606  |       |
| 20 – 24                                                    | 2794                                          | 3415    | 3094    | 5.1                                       | 12.3   | 8.9     | 7614                                                   | 333    | 246050         | 12901  |       |
| 25 – 29                                                    | 2891                                          | 4351    | 3587    | 6.7                                       | 8.6    | 7.8     | 7551                                                   | 327    | 210508         | 12126  |       |
| 15 – 29                                                    | 2873                                          | 3597    | 3214    | 5.6                                       | 17.3   | 11.7    | 22892                                                  | 992    | 712301         | 37633  |       |
| 30 – 34                                                    | 3362                                          | 3975    | 3660    | 10.4                                      | 6.1    | 8.1     | 7167                                                   | 275    | 195796         | 10654  |       |
| 35 – 39                                                    | 3695                                          | 4086    | 3891    | 9.0                                       | 20.2   | 14.9    | 7077                                                   | 292    | 181886         | 9238   |       |
| 40 – 44                                                    | 3508                                          | 4203    | 3839    | 9.4                                       | 7.6    | 8.5     | 5867                                                   | 230    | 152833         | 7448   |       |
| 30 – 44                                                    | 3516                                          | 4078    | 3791    | 9.6                                       | 11.5   | 10.6    | 20111                                                  | 797    | 530515         | 27340  |       |
| 45 – 49                                                    | 2651                                          | 4971    | 3708    | 22.0                                      | 48.5   | 38.3    | 4773                                                   | 223    | 128711         | 6347   |       |
| 50 – 54                                                    | 2304                                          | 6481    | 4328    | 25.0                                      | 96.3   | 77.5    | 4316                                                   | 203    | 99725          | 5188   |       |
| 55 – 59                                                    | 4384                                          | 4012    | 4201    | 15.9                                      | 24.9   | 20.1    | 3778                                                   | 200    | 89940          | 5224   |       |
| 45 – 59                                                    | 3019                                          | 5173    | 4042    | 20.3                                      | 62.9   | 46.5    | 12867                                                  | 626    | 318376         | 16759  |       |
| 60 & above                                                 | 4788                                          | 6144    | 5480    | 104.5                                     | 96     | 99.6    | 9031                                                   | 700    | 164795         | 12801  |       |
| 15 & above                                                 | 3267                                          | 4292    | 3760    | 22.9                                      | 37.6   | 31      | 64901                                                  | 3115   | 1725986        | 94533  |       |
| all ages                                                   | 4167                                          | 4623    | 4385    | 16.2                                      | 27.5   | 21.9    | 107268                                                 | 5190   | 2446300        | 133077 |       |
| estd. no. of persons rep. ailment during last 15 days (00) | 53197                                         | 54071   | 107268  | X                                         | X      | X       | X                                                      | X      | X              | X      |       |
| sample persons rep. ailment during last 15 days            | 2538                                          | 2652    | 5190    | X                                         | X      | X       | X                                                      | X      | X              | X      |       |
| estd. no. of persons(00)                                   | 1276650                                       | 1169650 | 2446300 | X                                         | X      | X       | X                                                      | X      | X              | X      |       |
| sample persons                                             | 68070                                         | 65007   | 133077  | X                                         | X      | X       | X                                                      | X      | X              | X      |       |

Table (38): Number of persons per 1,00,000 reporting onset of ailments during last 15 days and average duration of ailment by sex and age-group

| All-India                                                  |                                               |         |         |                                           |        |         | Rural+Urban                                            |        |                |        |
|------------------------------------------------------------|-----------------------------------------------|---------|---------|-------------------------------------------|--------|---------|--------------------------------------------------------|--------|----------------|--------|
| age-group                                                  | incidence rate of ailment during last 15 days |         |         | average duration of ailment in days (0.0) |        |         | persons reporting onset of ailment during last 15 days |        | all persons    |        |
|                                                            | male                                          | female  | persons | male                                      | female | persons | estd. no. (00)                                         | sample | estd. no. (00) | sample |
| (1)                                                        | (2)                                           | (3)     | (4)     | (5)                                       | (6)    | (7)     | (8)                                                    | (9)    | (10)           | (11)   |
| 0 – 4                                                      | 9888                                          | 9013    | 9463    | 7.4                                       | 5.4    | 6.5     | 101502                                                 | 3587   | 1072586        | 41326  |
| 5 – 9                                                      | 4666                                          | 3911    | 4305    | 10.1                                      | 6.6    | 8.6     | 49678                                                  | 1637   | 1153941        | 43187  |
| 10 – 14                                                    | 3199                                          | 2710    | 2971    | 10.6                                      | 13.5   | 11.8    | 33370                                                  | 1079   | 1123322        | 41647  |
| 5 – 14                                                     | 5810                                          | 5179    | 5509    | 8.7                                       | 7.1    | 8.0     | 184550                                                 | 6303   | 3349848        | 126160 |
| 15 – 19                                                    | 2863                                          | 3164    | 3002    | 6.1                                       | 15.5   | 10.7    | 27152                                                  | 924    | 904535         | 36193  |
| 20 – 24                                                    | 2424                                          | 3227    | 2834    | 12.6                                      | 17.3   | 15.3    | 23651                                                  | 851    | 834463         | 34434  |
| 25 – 29                                                    | 2453                                          | 3826    | 3144    | 6.6                                       | 10.0   | 8.7     | 24608                                                  | 856    | 782583         | 32382  |
| 15 – 29                                                    | 2600                                          | 3397    | 2991    | 8.2                                       | 14.1   | 11.5    | 75411                                                  | 2631   | 2521581        | 103009 |
| 30 – 34                                                    | 3026                                          | 4013    | 3536    | 20.3                                      | 7.2    | 12.6    | 25256                                                  | 819    | 714317         | 28349  |
| 35 – 39                                                    | 3067                                          | 4139    | 3592    | 13.3                                      | 19.1   | 16.6    | 23812                                                  | 779    | 662930         | 25301  |
| 40 – 44                                                    | 3725                                          | 4849    | 4262    | 41.4                                      | 12.0   | 25.4    | 22731                                                  | 675    | 533352         | 20053  |
| 30 – 44                                                    | 3243                                          | 4281    | 3758    | 25.0                                      | 12.6   | 18.0    | 71799                                                  | 2273   | 1910599        | 73703  |
| 45 – 49                                                    | 3745                                          | 4953    | 4311    | 18.6                                      | 33.0   | 26.3    | 19411                                                  | 658    | 450272         | 17229  |
| 50 – 54                                                    | 3510                                          | 5728    | 4626    | 11.4                                      | 47.8   | 34.2    | 16493                                                  | 574    | 356568         | 14258  |
| 55 – 59                                                    | 4109                                          | 4965    | 4544    | 15.8                                      | 18.4   | 17.2    | 16203                                                  | 626    | 356551         | 15127  |
| 45 – 59                                                    | 3782                                          | 5200    | 4479    | 15.7                                      | 33.7   | 26      | 52108                                                  | 1858   | 1163390        | 46614  |
| 60 & above                                                 | 6108                                          | 6803    | 6454    | 50.9                                      | 57.5   | 54.4    | 43859                                                  | 2227   | 679582         | 35569  |
| 15 & above                                                 | 3391                                          | 4373    | 3875    | 23                                        | 25.6   | 24.4    | 243176                                                 | 8989   | 6275153        | 258895 |
| all ages                                                   | 4251                                          | 4647    | 4444    | 16                                        | 18.6   | 17.3    | 427727                                                 | 15292  | 9625001        | 385055 |
| estd. no. of persons rep. ailment during last 15 days (00) | 209731                                        | 217995  | 427727  | X                                         | X      | X       | X                                                      | X      | X              | X      |
| sample persons rep. ailment during last 15 days            | 7501                                          | 7791    | 15292   | X                                         | X      | X       | X                                                      | X      | X              | X      |
| estd. no. of persons(00)                                   | 4934159                                       | 4690841 | 9625001 | X                                         | X      | X       | X                                                      | X      | X              | X      |
| sample persons                                             | 196699                                        | 188356  | 385055  | X                                         | X      | X       | X                                                      | X      | X              | X      |

Table (39): Number per 1,00,000 of persons reporting onset of specific ailments during last 15 days and average duration of ailment by broad ailment type

| broad ailment type                               | All-India                                     |        |         |                                           |        |         | Rural                                                  |        |
|--------------------------------------------------|-----------------------------------------------|--------|---------|-------------------------------------------|--------|---------|--------------------------------------------------------|--------|
|                                                  | incidence rate of ailment during last 15 days |        |         | average duration of ailment in days (0.0) |        |         | persons reporting onset of ailment during last 15 days |        |
|                                                  | male                                          | female | persons | male                                      | female | persons | estd. no. (00)                                         | sample |
| (1)                                              | (2)                                           | (3)    | (4)     | (5)                                       | (6)    | (7)     | (8)                                                    | (9)    |
| <b>gastro-intestinal</b>                         |                                               |        |         |                                           |        |         |                                                        |        |
| diarrhoea/ dysentery                             | 403                                           | 408    | 406     | 5.4                                       | 5.5    | 5.4     | 29110                                                  | 958    |
| gastritis/ gastric or peptic ulcer               | 88                                            | 163    | 125     | 23.4                                      | 17.9   | 19.9    | 8987                                                   | 339    |
| worm infestation                                 | 29                                            | 29     | 29      | 5.9                                       | 42.2   | 23.6    | 2105                                                   | 66     |
| amoebiasis                                       | 20                                            | 26     | 23      | 8.5                                       | 4.4    | 6.2     | 1643                                                   | 59     |
| hepatitis/ jaundice                              | 15                                            | 12     | 14      | 9.4                                       | 16.6   | 12.6    | 975                                                    | 30     |
| <b>cardio-vascular diseases</b>                  |                                               |        |         |                                           |        |         |                                                        |        |
| heart disease                                    | 15                                            | 18     | 16      | 42.2                                      | 108.0  | 77.5    | 1152                                                   | 60     |
| hypertension                                     | 31                                            | 48     | 39      | 219.6                                     | 85.7   | 138.8   | 2822                                                   | 103    |
| respiratory including ear/ nose/ throat ailments | 453                                           | 392    | 423     | 8.0                                       | 6.6    | 7.4     | 30389                                                  | 990    |
| tuberculosis                                     | 9                                             | 4      | 6       | 201.3                                     | 35.9   | 156.1   | 455                                                    | 29     |
| bronchial asthma                                 | 82                                            | 46     | 64      | 85.5                                      | 66.5   | 78.9    | 4611                                                   | 147    |
| disorders of joints and bones                    | 63                                            | 115    | 89      | 65.9                                      | 65.0   | 65.3    | 6355                                                   | 235    |
| diseases of kidney/ urinary system               | 19                                            | 13     | 16      | 101.4                                     | 76.4   | 91.5    | 1137                                                   | 57     |
| prostatic disorders                              | 3                                             | 1      | 2       | 15.5                                      | 5.0    | 13.2    | 159                                                    | 9      |
| gynaecological disorders                         | 3                                             | 63     | 33      | 2.0                                       | 17.4   | 16.5    | 2339                                                   | 90     |
| neurological disorders                           | 32                                            | 50     | 41      | 28.2                                      | 10.0   | 17.4    | 2927                                                   | 87     |
| psychiatric disorders                            | 8                                             | 4      | 6       | 556.0                                     | 16.5   | 392.6   | 442                                                    | 18     |
| <b>eye ailment</b>                               |                                               |        |         |                                           |        |         |                                                        |        |
| conjunctivitis                                   | 14                                            | 19     | 17      | 9.2                                       | 5.8    | 7.2     | 1189                                                   | 39     |
| glaucoma                                         | 1                                             | 5      | 3       | 12.0                                      | 756.6  | 649.6   | 202                                                    | 6      |
| cataract                                         | 7                                             | 6      | 6       | 96.4                                      | 155.1  | 123.8   | 451                                                    | 25     |
| diseases of skin                                 | 69                                            | 69     | 69      | 10.4                                      | 20.5   | 15.4    | 4962                                                   | 137    |
| goitre                                           | 2                                             | 1      | 1       | 6.4                                       | 6.9    | 6.5     | 107                                                    | 7      |
| diabetes mellitus                                | 13                                            | 11     | 12      | 88.6                                      | 112.9  | 99.6    | 853                                                    | 26     |
| under-nutrition                                  | 0                                             | 2      | 1       | 10.0                                      | 3.4    | 3.5     | 63                                                     | 5      |
| anaemia                                          | 2                                             | 16     | 9       | 4.1                                       | 10.5   | 9.7     | 654                                                    | 26     |
| sexually transmitted diseases                    | 0                                             | 3      | 1       | 6.9                                       | 30.6   | 28.7    | 105                                                    | 8      |
| <b>febrile illness</b>                           |                                               |        |         |                                           |        |         |                                                        |        |
| malaria                                          | 131                                           | 140    | 135     | 7.1                                       | 6.7    | 6.9     | 9702                                                   | 279    |
| eruptive                                         | 29                                            | 53     | 41      | 14.1                                      | 7.5    | 9.9     | 2937                                                   | 56     |
| mumps                                            | 12                                            | 24     | 18      | 6.0                                       | 27.0   | 19.7    | 1295                                                   | 41     |
| diphtheria                                       | 10                                            | 6      | 8       | 4.4                                       | 44.8   | 19.0    | 592                                                    | 16     |

Continued

A-160

Report No 507: Morbidity, Health Care and the Condition of the Aged, Jan.-June, 2004

Table (39): Number per 1,00,000 of persons reporting onset of specific ailments during last 15 days and average duration of ailment by broad ailment type

| broad ailment type                                         | incidence rate of ailment during last 15 days |             |             | average duration of ailment in days (0.0) |             |             | persons reporting onset of ailment during last 15 days |              |
|------------------------------------------------------------|-----------------------------------------------|-------------|-------------|-------------------------------------------|-------------|-------------|--------------------------------------------------------|--------------|
|                                                            | male                                          | female      | persons     | male                                      | female      | persons     | estd. no. (00)                                         | sample       |
|                                                            | (2)                                           | (3)         | (4)         | (5)                                       | (6)         | (7)         | (8)                                                    | (9)          |
| whooping cough                                             | 142                                           | 188         | 164         | 6.7                                       | 9.0         | 8.0         | 11803                                                  | 329          |
| fever of unknown origin                                    | 1458                                          | 1604        | 1530        | 5.7                                       | 4.9         | 5.3         | 109804                                                 | 3150         |
| tetanus                                                    | 2                                             | 2           | 2           | 14.4                                      | 7.7         | 11.3        | 134                                                    | 6            |
| filariasis/elephantiasis                                   | 1                                             | 1           | 1           | 18.5                                      | 5.0         | 12.7        | 46                                                     | 5            |
| <b>disability</b>                                          |                                               |             |             |                                           |             |             |                                                        |              |
| locomotor                                                  | 12                                            | 25          | 18          | 162.7                                     | 47.6        | 86.9        | 1319                                                   | 56           |
| visual including blindness (excluding cataract)            | 3                                             | 13          | 8           | 136                                       | 10.5        | 37.8        | 568                                                    | 24           |
| speech                                                     | 2                                             | 0           | 1           | 999.0                                     | 0           | 999.0       | 87                                                     | 1            |
| hearing                                                    | 10                                            | 7           | 8           | 9.5                                       | 9.1         | 9.3         | 597                                                    | 20           |
| diseases of mouth/teeth/gum                                | 46                                            | 70          | 57          | 99.2                                      | 21.5        | 53.0        | 4120                                                   | 122          |
| accidents/ injuries/ burns/ fractures/ poisoning           | 187                                           | 81          | 135         | 7.6                                       | 26.6        | 13.2        | 9697                                                   | 303          |
| cancer and other tumours                                   | 11                                            | 4           | 8           | 13.7                                      | 31.6        | 18.4        | 563                                                    | 25           |
| other diagnosed ailments                                   | 646                                           | 720         | 682         | 9.7                                       | 23.4        | 16.8        | 48983                                                  | 1472         |
| other undiagnosed ailments                                 | 117                                           | 123         | 120         | 17.1                                      | 24.7        | 20.9        | 8593                                                   | 274          |
| <b>all</b>                                                 | <b>4280</b>                                   | <b>4655</b> | <b>4464</b> | <b>16</b>                                 | <b>15.6</b> | <b>15.8</b> | <b>320459</b>                                          | <b>10102</b> |
| estd. no. of persons rep. ailment during last 15 days (00) | 156534                                        | 163925      | 320459      | X                                         | X           | X           | X                                                      | X            |
| sample persons rep. ailment during last 15 days            | 4963                                          | 5139        | 10102       | X                                         | X           | X           | X                                                      | X            |
| estd. no. of persons(00)                                   | 3657509                                       | 3521192     | 7178701     | X                                         | X           | X           | X                                                      | X            |
| sample persons                                             | 128629                                        | 123349      | 251978      | X                                         | X           | X           | X                                                      | X            |

Table (39): Number per 1,00,000 of persons reporting onset of specific ailments during last 15 days and average duration of ailment by broad ailment type

| broad ailment type                               | All-India                                     |        |         |                                           |        |         | Urban                                                  |        |
|--------------------------------------------------|-----------------------------------------------|--------|---------|-------------------------------------------|--------|---------|--------------------------------------------------------|--------|
|                                                  | incidence rate of ailment during last 15 days |        |         | average duration of ailment in days (0.0) |        |         | persons reporting onset of ailment during last 15 days |        |
|                                                  | male                                          | female | persons | male                                      | female | persons | estd. no. (00)                                         | sample |
| (1)                                              | (2)                                           | (3)    | (4)     | (5)                                       | (6)    | (7)     | (8)                                                    | (9)    |
| <b>gastro-intestinal</b>                         |                                               |        |         |                                           |        |         |                                                        |        |
| diarrhoea/ dysentery                             | 333                                           | 286    | 310     | 7.8                                       | 4.0    | 6.2     | 7590                                                   | 368    |
| gastritis/ gastric or peptic ulcer               | 75                                            | 133    | 103     | 8.2                                       | 40.1   | 27.9    | 2516                                                   | 117    |
| worm infestation                                 | 21                                            | 30     | 25      | 6.4                                       | 29.3   | 19.6    | 619                                                    | 27     |
| amoebiasis                                       | 18                                            | 14     | 17      | 3.8                                       | 6.2    | 4.8     | 405                                                    | 23     |
| hepatitis/ jaundice                              | 21                                            | 10     | 16      | 4.9                                       | 21.9   | 9.9     | 383                                                    | 30     |
| <b>cardio-vascular diseases</b>                  |                                               |        |         |                                           |        |         |                                                        |        |
| heart disease                                    | 28                                            | 30     | 29      | 102.6                                     | 123.5  | 113.0   | 711                                                    | 60     |
| hypertension                                     | 61                                            | 116    | 87      | 246.3                                     | 190.1  | 210.7   | 2139                                                   | 97     |
| respiratory including ear/ nose/ throat ailments | 527                                           | 474    | 502     | 5.7                                       | 12.4   | 8.7     | 12270                                                  | 589    |
| tuberculosis                                     | 8                                             | 1      | 5       | 19.1                                      | 15.    | 18.6    | 122                                                    | 12     |
| bronchial asthma                                 | 59                                            | 46     | 53      | 75.7                                      | 96.3   | 84.3    | 1296                                                   | 73     |
| disorders of joints and bones                    | 67                                            | 132    | 98      | 75.2                                      | 99.5   | 90.9    | 2401                                                   | 128    |
| diseases of kidney/ urinary system               | 20                                            | 35     | 27      | 52.3                                      | 31.2   | 39.3    | 668                                                    | 37     |
| prostatic disorders                              | 2                                             | 1      | 1       | 60.0                                      | 12.3   | 46.5    | 31                                                     | 3      |
| gynaecological disorders                         | 0                                             | 67     | 32      | 0                                         | 16.7   | 16.7    | 785                                                    | 58     |
| neurological disorders                           | 14                                            | 31     | 22      | 93.4                                      | 251.9  | 198.2   | 546                                                    | 35     |
| psychiatric disorders                            | 6                                             | 3      | 5       | 2.9                                       | 9.4    | 4.8     | 110                                                    | 6      |
| <b>eye ailment</b>                               |                                               |        |         |                                           |        |         |                                                        |        |
| conjunctivitis                                   | 34                                            | 13     | 24      | 8.0                                       | 3.5    | 6.9     | 577                                                    | 22     |
| glaucoma                                         | 1                                             | 4      | 2       | 5.0                                       | 186.7  | 163.2   | 59                                                     | 6      |
| cataract                                         | 4                                             | 7      | 6       | 204.7                                     | 63.9   | 119.1   | 143                                                    | 15     |
| diseases of skin                                 | 45                                            | 83     | 64      | 9.5                                       | 17.3   | 14.4    | 1554                                                   | 69     |
| goitre                                           | 0                                             | 2      | 1       | 12.0                                      | 17.8   | 17.0    | 24                                                     | 3      |
| diabetes mellitus                                | 20                                            | 34     | 27      | 191.4                                     | 619.6  | 453.9   | 655                                                    | 41     |
| under-nutrition                                  | 0                                             | 8      | 4       | 0                                         | 5.3    | 5.3     | 89                                                     | 5      |
| anaemia                                          | 5                                             | 15     | 10      | 79.5                                      | 7.1    | 26.4    | 240                                                    | 17     |
| sexually transmitted diseases                    | 0                                             | 0      | 0       | 0                                         | 0      | 0       | 0                                                      | 0      |
| <b>febrile illness</b>                           |                                               |        |         |                                           |        |         |                                                        |        |
| malaria                                          | 69                                            | 77     | 73      | 5.7                                       | 6.2    | 6.0     | 1783                                                   | 91     |
| eruptive                                         | 13                                            | 19     | 16      | 9.7                                       | 7.1    | 8.2     | 388                                                    | 14     |
| mumps                                            | 6                                             | 31     | 18      | 5.2                                       | 6.2    | 6.0     | 441                                                    | 19     |
| diphtheria                                       | 28                                            | 7      | 18      | 8.8                                       | 6.7    | 8.4     | 438                                                    | 13     |

Continued

A-162

Report No 507: Morbidity, Health Care and the Condition of the Aged, Jan.-June, 2004

Table (39): Number per 1,00,000 of persons reporting onset of specific ailments during last 15 days and average duration of ailment by broad ailment type

| broad ailment type                                         | incidence rate of ailment during last 15 days |             |             | average duration of ailment in days (0.0) |             |             | persons reporting onset of ailment during last 15 days |             |
|------------------------------------------------------------|-----------------------------------------------|-------------|-------------|-------------------------------------------|-------------|-------------|--------------------------------------------------------|-------------|
|                                                            | male                                          | female      | persons     | male                                      | female      | persons     | estd. no. (00)                                         | sample      |
|                                                            | (2)                                           | (3)         | (4)         | (5)                                       | (6)         | (7)         | (8)                                                    | (9)         |
| whooping cough                                             | 226                                           | 108         | 169         | 6.2                                       | 43          | 17.4        | 4143                                                   | 196         |
| fever of unknown origin                                    | 1212                                          | 1497        | 1349        | 5.1                                       | 5.8         | 5.4         | 32991                                                  | 1495        |
| tetanus                                                    | -                                             | -           | -           | -                                         | -           | -           | 0                                                      | 0           |
| filariasis/elephantiasis                                   | 0                                             | 2           | 1           | 0                                         | 6.7         | 6.7         | 22                                                     | 2           |
| <b>disability</b>                                          |                                               |             |             |                                           |             |             |                                                        |             |
| locomotor                                                  | 16                                            | 18          | 17          | 402.0                                     | 72.0        | 235.2       | 411                                                    | 23          |
| visual including blindness (excluding cataract)            | 3                                             | 19          | 11          | 13.9                                      | 202.2       | 174.2       | 264                                                    | 13          |
| speech                                                     | 0                                             | 0           | 0           | 999.0                                     | 0           | 999.0       | 3                                                      | 1           |
| hearing                                                    | 27                                            | 11          | 19          | 39.6                                      | 65          | 46.4        | 464                                                    | 17          |
| diseases of mouth/teeth/gum                                | 54                                            | 88          | 70          | 16.7                                      | 11.5        | 13.6        | 1722                                                   | 77          |
| accidents/ injuries/ burns/ fractures/ poisoning           | 219                                           | 82          | 154         | 12.8                                      | 6.8         | 11.2        | 3758                                                   | 166         |
| cancer and other tumours                                   | 13                                            | 4           | 9           | 12.1                                      | 474.8       | 124.5       | 212                                                    | 16          |
| other diagnosed ailments                                   | 792                                           | 914         | 851         | 6.6                                       | 14.7        | 10.7        | 20812                                                  | 880         |
| other undiagnosed ailments                                 | 83                                            | 115         | 98          | 7.3                                       | 5.2         | 6.1         | 2404                                                   | 127         |
| <b>all</b>                                                 | <b>4167</b>                                   | <b>4623</b> | <b>4385</b> | <b>16.2</b>                               | <b>27.5</b> | <b>21.9</b> | <b>107268</b>                                          | <b>5190</b> |
| estd. no. of persons rep. ailment during last 15 days (00) | 53197                                         | 54071       | 107268      | X                                         | X           | X           | X                                                      | X           |
| sample persons rep. ailment during last 15 days            | 2538                                          | 2652        | 5190        | X                                         | X           | X           | X                                                      | X           |
| estd. no. of persons(00)                                   | 1276650                                       | 1169650     | 2446300     | X                                         | X           | X           | X                                                      | X           |
| sample persons                                             | 68070                                         | 65007       | 133077      | X                                         | X           | X           | X                                                      | X           |



Table (39): Number per 1,00,000 of persons reporting onset of specific ailments during last 15 days and average duration of ailment by broad ailment type

| All-India                                        |                                               |        |         |                                           |        |         | Rural + Urban                                          |        |
|--------------------------------------------------|-----------------------------------------------|--------|---------|-------------------------------------------|--------|---------|--------------------------------------------------------|--------|
| broad ailment type                               | incidence rate of ailment during last 15 days |        |         | average duration of ailment in days (0.0) |        |         | persons reporting onset of ailment during last 15 days |        |
|                                                  | male                                          | female | persons | male                                      | female | persons | estd. no. (00)                                         | sample |
| (1)                                              | (2)                                           | (3)    | (4)     | (5)                                       | (6)    | (7)     | (8)                                                    | (9)    |
| <b>gastro-intestinal</b>                         |                                               |        |         |                                           |        |         |                                                        |        |
| diarrhoea/ dysentery                             | 385                                           | 378    | 381     | 5.9                                       | 5.2    | 5.6     | 36701                                                  | 1326   |
| gastritis/ gastric or peptic ulcer               | 85                                            | 156    | 120     | 19.9                                      | 22.6   | 21.6    | 11503                                                  | 456    |
| worm infestation                                 | 27                                            | 30     | 28      | 6.0                                       | 38.9   | 22.7    | 2724                                                   | 93     |
| amoebiasis                                       | 19                                            | 23     | 21      | 7.3                                       | 4.7    | 5.9     | 2047                                                   | 82     |
| hepatitis/ jaundice                              | 16                                            | 12     | 14      | 7.9                                       | 17.7   | 11.8    | 1358                                                   | 60     |
| <b>cardio-vascular diseases</b>                  |                                               |        |         |                                           |        |         |                                                        |        |
| heart disease                                    | 18                                            | 21     | 19      | 66.4                                      | 113.6  | 91.0    | 1863                                                   | 120    |
| hypertension                                     | 39                                            | 65     | 52      | 230.6                                     | 132.0  | 169.8   | 4961                                                   | 200    |
| respiratory including ear/ nose/ throat ailments | 473                                           | 412    | 443     | 7.3                                       | 8.3    | 7.8     | 42659                                                  | 1579   |
| tuberculosis                                     | 9                                             | 3      | 6       | 156.5                                     | 33.8   | 127.1   | 577                                                    | 41     |
| bronchial asthma                                 | 76                                            | 46     | 61      | 83.6                                      | 74.0   | 80.1    | 5908                                                   | 220    |
| disorders of joints and bones                    | 64                                            | 120    | 91      | 68.4                                      | 74.6   | 72.3    | 8756                                                   | 363    |
| diseases of kidney/ urinary system               | 19                                            | 18     | 19      | 88.0                                      | 54.9   | 72.2    | 1805                                                   | 94     |
| prostatic disorders                              | 3                                             | 1      | 2       | 22.3                                      | 6.5    | 18.6    | 190                                                    | 12     |
| gynaecological disorders                         | 3                                             | 64     | 32      | 2.0                                       | 17.2   | 16.6    | 3124                                                   | 148    |
| neurological disorders                           | 28                                            | 45     | 36      | 37.1                                      | 51.4   | 45.8    | 3472                                                   | 122    |
| psychiatric disorders                            | 8                                             | 4      | 6       | 443.3                                     | 15.2   | 315.2   | 553                                                    | 24     |
| <b>eye ailment</b>                               |                                               |        |         |                                           |        |         |                                                        |        |
| conjunctivitis                                   | 19                                            | 18     | 18      | 8.7                                       | 5.4    | 7.1     | 1766                                                   | 61     |
| glaucoma                                         | 1                                             | 5      | 3       | 10.5                                      | 626.2  | 539.8   | 261                                                    | 12     |
| cataract                                         | 6                                             | 6      | 6       | 116.8                                     | 128.6  | 122.7   | 594                                                    | 40     |
| diseases of skin                                 | 63                                            | 73     | 68      | 10.2                                      | 19.6   | 15.1    | 6515                                                   | 206    |
| goitre                                           | 2                                             | 1      | 1       | 6.6                                       | 11.3   | 8.0     | 131                                                    | 10     |
| diabetes mellitus                                | 15                                            | 17     | 16      | 124.8                                     | 370.8  | 253.6   | 1508                                                   | 67     |
| under-nutrition                                  | 0                                             | 3      | 2       | 10.0                                      | 4.5    | 4.5     | 152                                                    | 10     |
| anaemia                                          | 3                                             | 16     | 9       | 37.3                                      | 9.7    | 14.2    | 894                                                    | 43     |
| sexually transmitted diseases                    | 0                                             | 2      | 1       | 6.9                                       | 30.6   | 28.7    | 105                                                    | 8      |
| <b>febrile illness</b>                           |                                               |        |         |                                           |        |         |                                                        |        |
| malaria                                          | 115                                           | 124    | 119     | 6.9                                       | 6.7    | 6.8     | 11484                                                  | 370    |
| eruptive                                         | 25                                            | 45     | 35      | 13.5                                      | 7.4    | 9.7     | 3324                                                   | 70     |
| mumps                                            | 11                                            | 26     | 18      | 5.9                                       | 20.7   | 16.2    | 1736                                                   | 60     |
| diphtheria                                       | 15                                            | 6      | 11      | 6.5                                       | 34.4   | 14.5    | 1030                                                   | 29     |

Continued

Table (39): Number per 1,00,000 of persons reporting onset of specific ailments during last 15 days and average duration of ailment by broad ailment type

All-India

Rural + Urban

| broad ailment type                                         | incidence rate of ailment during last 15 days |             |             | average duration of ailment in days (0.0) |             |             | persons reporting onset of ailment during last 15 days |              |
|------------------------------------------------------------|-----------------------------------------------|-------------|-------------|-------------------------------------------|-------------|-------------|--------------------------------------------------------|--------------|
|                                                            | male                                          | female      | persons     | male                                      | female      | persons     | estd. no. (00)                                         | sample       |
| (1)                                                        | (2)                                           | (3)         | (4)         | (5)                                       | (6)         | (7)         | (8)                                                    | (9)          |
| whooping cough                                             | 163                                           | 168         | 166         | 6.5                                       | 14.5        | 10.5        | 15946                                                  | 525          |
| fever of unknown origin                                    | 1395                                          | 1577        | 1484        | 5.6                                       | 5.1         | 5.3         | 142795                                                 | 4645         |
| tetanus                                                    | 1                                             | 1           | 1           | 14.4                                      | 7.7         | 11.3        | 134                                                    | 6            |
| filariasis/elephantiasis                                   | 1                                             | 1           | 1           | 18.5                                      | 5.9         | 10.7        | 68                                                     | 7            |
| <b>disability</b>                                          |                                               |             |             |                                           |             |             |                                                        |              |
| locomotor                                                  | 13                                            | 23          | 18          | 237.1                                     | 52.3        | 122.2       | 1730                                                   | 79           |
| visual including blindness (excluding cataract)            | 3                                             | 14          | 9           | 106.5                                     | 74.9        | 81.1        | 833                                                    | 37           |
| speech                                                     | 2                                             | 0           | 1           | 999.0                                     | 0           | 999.0       | 90                                                     | 2            |
| hearing                                                    | 14                                            | 8           | 11          | 24                                        | 28.7        | 25.6        | 1062                                                   | 37           |
| diseases of mouth/teeth/gum                                | 48                                            | 74          | 61          | 75.0                                      | 18.6        | 41.4        | 5842                                                   | 199          |
| accidents/ injuries/ burns/ fractures/ poisoning           | 195                                           | 81          | 140         | 9.1                                       | 21.6        | 12.6        | 13455                                                  | 469          |
| cancer and other tumours                                   | 12                                            | 4           | 8           | 13.2                                      | 146.4       | 47.4        | 775                                                    | 41           |
| other diagnosed ailments                                   | 684                                           | 768         | 725         | 8.8                                       | 20.8        | 15          | 69795                                                  | 2352         |
| other undiagnosed ailments                                 | 108                                           | 121         | 114         | 15.1                                      | 20.1        | 17.7        | 10998                                                  | 401          |
| <b>all</b>                                                 | <b>4251</b>                                   | <b>4647</b> | <b>4444</b> | <b>16</b>                                 | <b>18.6</b> | <b>17.3</b> | <b>427727</b>                                          | <b>15292</b> |
| estd. no. of persons rep. ailment during last 15 days (00) | 209731                                        | 217995      | 427727      | X                                         | X           | X           | X                                                      | X            |
| sample persons rep. ailment during last 15 days            | 7501                                          | 7791        | 15292       | X                                         | X           | X           | X                                                      | X            |
| estd. no. of persons(00)                                   | 4934159                                       | 4690841     | 9625001     | X                                         | X           | X           | X                                                      | X            |
| sample persons                                             | 196699                                        | 188356      | 385055      | X                                         | X           | X           | X                                                      | X            |

Table (40): Average number of spells of ailment during last 15 days, average time of indisposition during last 15 days, average total duration of ailment and average loss of household income due to ailment during last 15 days for each age-group

| All-India       |                                            |                                                                 |                        |                  |                                             |                                                       | Rural                        |        |                                               |        |
|-----------------|--------------------------------------------|-----------------------------------------------------------------|------------------------|------------------|---------------------------------------------|-------------------------------------------------------|------------------------------|--------|-----------------------------------------------|--------|
| broad age-group | average number of spells of ailment* (0.0) | average (per person) number of days during last 15 days (bl. 9) |                        |                  | total duration of ailment from commencement | average loss of household income due to ailment (Rs.) | number of spells of ailments |        | persons reporting ailment during last 15 days |        |
|                 |                                            | ill                                                             | on restricted activity | con-fined to bed |                                             |                                                       | estd. (00)                   | sample | estd. no. (00)                                | sample |
| (1)             | (2)                                        | (3)                                                             | (4)                    | (5)              | (6)                                         | (7)                                                   | (8)                          | (9)    | (10)                                          | (11)   |
| males           |                                            |                                                                 |                        |                  |                                             |                                                       |                              |        |                                               |        |
| 0 – 14          | 1.0                                        | 7                                                               | 2                      | 1                | 44                                          | 35                                                    | 105393                       | 3280   | 104236                                        | 3251   |
| 15 – 29         | 1.0                                        | 8                                                               | 3                      | 1                | 98                                          | 155                                                   | 37390                        | 1414   | 36970                                         | 1399   |
| 30 – 44         | 1.0                                        | 9                                                               | 3                      | 1                | 181                                         | 284                                                   | 44602                        | 1561   | 43897                                         | 1536   |
| 45 – 59         | 1.0                                        | 11                                                              | 4                      | 1                | 269                                         | 566                                                   | 47563                        | 1747   | 45571                                         | 1688   |
| 60 & above      | 1.1                                        | 14                                                              | 4                      | 1                | 438                                         | 113                                                   | 84430                        | 3836   | 74362                                         | 3413   |
| all             | 1.0                                        | 10                                                              | 3                      | 1                | 200                                         | 184                                                   | 319377                       | 11838  | 305036                                        | 11287  |
| females         |                                            |                                                                 |                        |                  |                                             |                                                       |                              |        |                                               |        |
| 0 – 14          | 1.0                                        | 6                                                               | 2                      | 1                | 31                                          | 35                                                    | 85568                        | 2587   | 85021                                         | 2576   |
| 15 – 29         | 1.0                                        | 8                                                               | 2                      | 1                | 99                                          | 64                                                    | 51632                        | 1742   | 51105                                         | 1727   |
| 30 – 44         | 1.0                                        | 10                                                              | 3                      | 1                | 166                                         | 83                                                    | 64963                        | 2123   | 63830                                         | 2083   |
| 45 – 59         | 1.0                                        | 11                                                              | 3                      | 1                | 267                                         | 75                                                    | 57385                        | 2191   | 55366                                         | 2116   |
| 60 & above      | 1.1                                        | 14                                                              | 4                      | 1                | 479                                         | 37                                                    | 81964                        | 3530   | 71576                                         | 3120   |
| all             | 1.0                                        | 10                                                              | 3                      | 1                | 206                                         | 56                                                    | 341512                       | 12173  | 326898                                        | 11622  |
| persons         |                                            |                                                                 |                        |                  |                                             |                                                       |                              |        |                                               |        |
| 0 – 14          | 1.0                                        | 6                                                               | 2                      | 1                | 38                                          | 35                                                    | 190961                       | 5867   | 189257                                        | 5827   |
| 15 – 29         | 1.0                                        | 8                                                               | 3                      | 1                | 99                                          | 102                                                   | 89022                        | 3156   | 88074                                         | 3126   |
| 30 – 44         | 1.0                                        | 10                                                              | 3                      | 1                | 172                                         | 165                                                   | 109565                       | 3684   | 107728                                        | 3619   |
| 45 – 59         | 1.0                                        | 11                                                              | 3                      | 1                | 268                                         | 297                                                   | 104948                       | 3938   | 100937                                        | 3804   |
| 60 & above      | 1.1                                        | 14                                                              | 4                      | 1                | 458                                         | 76                                                    | 166394                       | 7366   | 145938                                        | 6533   |
| all             | 1.0                                        | 10                                                              | 3                      | 1                | 203                                         | 118                                                   | 660890                       | 24011  | 631934                                        | 22909  |

\* begun, ended or continuing per person reporting ailment during last 15 days

Table (40): Average number of spells of ailment during last 15 days, average time of indisposition during last 15 days, average total duration of ailment and average loss of household income due to ailment during last 15 days for each age-group

| All-India       |                                            |                                                                 |                        |                  |                                             |                                                       | Urban                        |        |                                               |        |
|-----------------|--------------------------------------------|-----------------------------------------------------------------|------------------------|------------------|---------------------------------------------|-------------------------------------------------------|------------------------------|--------|-----------------------------------------------|--------|
| broad age-group | average number of spells of ailment* (0.0) | average (per person) number of days during last 15 days (bl. 9) |                        |                  | total duration of ailment from commencement | average loss of household income due to ailment (Rs.) | number of spells of ailments |        | persons reporting ailment during last 15 days |        |
|                 |                                            | ill                                                             | on restricted activity | con-fined to bed |                                             |                                                       | estd. (00)                   | sample | estd. no. (00)                                | sample |
| (1)             | (2)                                        | (3)                                                             | (4)                    | (5)              | (6)                                         | (7)                                                   | (8)                          | (9)    | (10)                                          | (11)   |
| males           |                                            |                                                                 |                        |                  |                                             |                                                       |                              |        |                                               |        |
| 0 – 14          | 1.0                                        | 6                                                               | 1                      | 1                | 48                                          | 25                                                    | 32827                        | 1618   | 32106                                         | 1602   |
| 15 – 29         | 1.0                                        | 8                                                               | 2                      | 1                | 102                                         | 135                                                   | 17039                        | 776    | 16745                                         | 765    |
| 30 – 44         | 1.0                                        | 10                                                              | 2                      | 1                | 167                                         | 393                                                   | 17978                        | 897    | 17448                                         | 869    |
| 45 – 59         | 1.0                                        | 13                                                              | 3                      | 1                | 402                                         | 273                                                   | 22333                        | 1184   | 21321                                         | 1118   |
| 60 & above      | 1.2                                        | 16                                                              | 4                      | 1                | 669                                         | 75                                                    | 34375                        | 2510   | 28366                                         | 2100   |
| all             | 1.1                                        | 11                                                              | 2                      | 1                | 291                                         | 154                                                   | 124552                       | 6985   | 115986                                        | 6454   |
| females         |                                            |                                                                 |                        |                  |                                             |                                                       |                              |        |                                               |        |
| 0 – 14          | 1.0                                        | 6                                                               | 2                      | 1                | 50                                          | 25                                                    | 25293                        | 1283   | 25005                                         | 1273   |
| 15 – 29         | 1.0                                        | 9                                                               | 2                      | 0                | 124                                         | 44                                                    | 19119                        | 988    | 18704                                         | 973    |
| 30 – 44         | 1.0                                        | 11                                                              | 2                      | 0                | 242                                         | 44                                                    | 25472                        | 1175   | 24598                                         | 1148   |
| 45 – 59         | 1.1                                        | 13                                                              | 2                      | 1                | 411                                         | 31                                                    | 28164                        | 1547   | 26164                                         | 1422   |
| 60 & above      | 1.2                                        | 16                                                              | 4                      | 1                | 654                                         | 20                                                    | 39377                        | 2814   | 32220                                         | 2331   |
| all             | 1.1                                        | 11                                                              | 2                      | 1                | 326                                         | 31                                                    | 137425                       | 7807   | 126691                                        | 7147   |
| persons         |                                            |                                                                 |                        |                  |                                             |                                                       |                              |        |                                               |        |
| 0 – 14          | 1.0                                        | 6                                                               | 1                      | 1                | 49                                          | 25                                                    | 58120                        | 2901   | 57111                                         | 2875   |
| 15 – 29         | 1.0                                        | 8                                                               | 2                      | 1                | 114                                         | 87                                                    | 36157                        | 1764   | 35450                                         | 1738   |
| 30 – 44         | 1.0                                        | 10                                                              | 2                      | 1                | 211                                         | 189                                                   | 43450                        | 2072   | 42046                                         | 2017   |
| 45 – 59         | 1.1                                        | 13                                                              | 2                      | 1                | 407                                         | 140                                                   | 50498                        | 2731   | 47484                                         | 2540   |
| 60 & above      | 1.2                                        | 16                                                              | 4                      | 1                | 661                                         | 46                                                    | 73753                        | 5324   | 60586                                         | 4431   |
| all             | 1.1                                        | 11                                                              | 2                      | 1                | 309                                         | 90                                                    | 261977                       | 14792  | 242677                                        | 13601  |

\* begun, ended or continuing per person reporting ailment during last 15 days

Table (40): Average number of spells of ailment during last 15 days, average time of indisposition during last 15 days, average total duration of ailment and average loss of household income due to ailment during last 15 days for each age-group

| All-India       |                                            |                                                                 |                        |                  |                                             | Rural+Urban                                           |                              |        |                                               |        |
|-----------------|--------------------------------------------|-----------------------------------------------------------------|------------------------|------------------|---------------------------------------------|-------------------------------------------------------|------------------------------|--------|-----------------------------------------------|--------|
| broad age-group | average number of spells of ailment* (0.0) | average (per person) number of days during last 15 days (bl. 9) |                        |                  | total duration of ailment from commencement | average loss of household income due to ailment (Rs.) | number of spells of ailments |        | persons reporting ailment during last 15 days |        |
|                 |                                            | ill                                                             | on restricted activity | con-fined to bed |                                             |                                                       | estd. (00)                   | sample | estd. no. (00)                                | sample |
| (1)             | (2)                                        | (3)                                                             | (4)                    | (5)              | (6)                                         | (7)                                                   | (8)                          | (9)    | (10)                                          | (11)   |
| males           |                                            |                                                                 |                        |                  |                                             |                                                       |                              |        |                                               |        |
| 0 – 14          | 1.0                                        | 7                                                               | 2                      | 1                | 45                                          | 33                                                    | 138219                       | 4898   | 136342                                        | 4853   |
| 15 – 29         | 1.0                                        | 8                                                               | 3                      | 1                | 99                                          | 149                                                   | 54428                        | 2190   | 53715                                         | 2164   |
| 30 – 44         | 1.0                                        | 9                                                               | 3                      | 1                | 177                                         | 315                                                   | 62580                        | 2458   | 61345                                         | 2405   |
| 45 – 59         | 1.0                                        | 12                                                              | 3                      | 1                | 311                                         | 473                                                   | 69896                        | 2931   | 66892                                         | 2806   |
| 60 & above      | 1.2                                        | 15                                                              | 4                      | 1                | 502                                         | 103                                                   | 118805                       | 6346   | 102729                                        | 5513   |
| all             | 1.1                                        | 10                                                              | 3                      | 1                | 225                                         | 176                                                   | 443929                       | 18823  | 421022                                        | 17741  |
| females         |                                            |                                                                 |                        |                  |                                             |                                                       |                              |        |                                               |        |
| 0 – 14          | 1.0                                        | 6                                                               | 2                      | 1                | 35                                          | 33                                                    | 110861                       | 3870   | 110026                                        | 3849   |
| 15 – 29         | 1.0                                        | 8                                                               | 2                      | 1                | 106                                         | 59                                                    | 70750                        | 2730   | 69809                                         | 2700   |
| 30 – 44         | 1.0                                        | 10                                                              | 2                      | 1                | 187                                         | 72                                                    | 90435                        | 3298   | 88428                                         | 3231   |
| 45 – 59         | 1.0                                        | 12                                                              | 3                      | 1                | 313                                         | 61                                                    | 85550                        | 3738   | 81530                                         | 3538   |
| 60 & above      | 1.2                                        | 15                                                              | 4                      | 1                | 533                                         | 32                                                    | 121342                       | 6344   | 103796                                        | 5451   |
| all             | 1.1                                        | 10                                                              | 3                      | 1                | 240                                         | 49                                                    | 478938                       | 19980  | 453589                                        | 18769  |
| persons         |                                            |                                                                 |                        |                  |                                             |                                                       |                              |        |                                               |        |
| 0 – 14          | 1.0                                        | 6                                                               | 2                      | 1                | 41                                          | 33                                                    | 249080                       | 8768   | 246368                                        | 8702   |
| 15 – 29         | 1.0                                        | 8                                                               | 2                      | 1                | 103                                         | 98                                                    | 125179                       | 4920   | 123524                                        | 4864   |
| 30 – 44         | 1.0                                        | 10                                                              | 3                      | 1                | 183                                         | 172                                                   | 153015                       | 5756   | 149773                                        | 5636   |
| 45 – 59         | 1.0                                        | 12                                                              | 3                      | 1                | 312                                         | 247                                                   | 155446                       | 6669   | 148422                                        | 6344   |
| 60 & above      | 1.2                                        | 15                                                              | 4                      | 1                | 518                                         | 67                                                    | 240147                       | 12690  | 206524                                        | 10964  |
| all             | 1.1                                        | 10                                                              | 3                      | 1                | 232                                         | 110                                                   | 922867                       | 38803  | 874611                                        | 36510  |

\* begun, ended or continuing per person reporting ailment during last 15 days

Table (41): Number per 1000 of spells of ailment during last 15 days treated on medical advice and per 1000 distribution of untreated spells of ailments not given medical treatment by reason for not taking treatment for each mpce class and social-group

| mpce class/<br>social group | number per 1000 of spells ailments treated on medical advice during last 15 days from |     |     | spells of ailments not given medical treatment by reason |                                                       |         |     |               |              |      |       | untreated spells of ailment |        | spells of ailment |        |                  |                                |        |
|-----------------------------|---------------------------------------------------------------------------------------|-----|-----|----------------------------------------------------------|-------------------------------------------------------|---------|-----|---------------|--------------|------|-------|-----------------------------|--------|-------------------|--------|------------------|--------------------------------|--------|
|                             |                                                                                       |     |     | no medical facilities available in the neighbourhood     | facilities available but no treatment sought owing to |         |     |               |              | n.r. | total | estd. no. (00)              | sample | estd. no. (00)    | sample |                  |                                |        |
|                             |                                                                                       |     |     |                                                          | government                                            | private | all | lack of faith | long waiting |      |       |                             |        |                   |        | financial reason | ailment not considered serious | others |
|                             |                                                                                       |     |     |                                                          |                                                       |         |     |               |              |      |       |                             |        |                   |        |                  |                                |        |
| 0 – 225                     | 204                                                                                   | 523 | 727 | 229                                                      | 49                                                    | 0       | 431 | 64            | 115          | 111  | 1000  | 3897                        | 108    | 14300             | 451    |                  |                                |        |
| 225 – 255                   | 174                                                                                   | 630 | 804 | 66                                                       | 58                                                    | 0       | 329 | 194           | 172          | 181  | 1000  | 1852                        | 73     | 9454              | 312    |                  |                                |        |
| 255 – 300                   | 186                                                                                   | 602 | 787 | 22                                                       | 33                                                    | 8       | 341 | 321           | 115          | 161  | 1000  | 4937                        | 171    | 23222             | 779    |                  |                                |        |
| 300 – 340                   | 209                                                                                   | 551 | 760 | 152                                                      | 17                                                    | 0       | 368 | 254           | 168          | 40   | 1000  | 5244                        | 155    | 21865             | 733    |                  |                                |        |
| 340 – 380                   | 181                                                                                   | 626 | 807 | 139                                                      | 27                                                    | 0       | 414 | 259           | 93           | 69   | 1000  | 5294                        | 177    | 27412             | 921    |                  |                                |        |
| 380 – 420                   | 177                                                                                   | 617 | 794 | 133                                                      | 28                                                    | 25      | 245 | 291           | 148          | 130  | 1000  | 6238                        | 198    | 30282             | 1069   |                  |                                |        |
| 420 – 470                   | 194                                                                                   | 632 | 827 | 147                                                      | 22                                                    | 7       | 189 | 433           | 115          | 88   | 1000  | 5575                        | 208    | 32143             | 1198   |                  |                                |        |
| 470 – 525                   | 139                                                                                   | 657 | 797 | 156                                                      | 60                                                    | 35      | 216 | 284           | 164          | 86   | 1000  | 7239                        | 247    | 35617             | 1330   |                  |                                |        |
| 525 – 615                   | 184                                                                                   | 665 | 849 | 126                                                      | 35                                                    | 2       | 228 | 334           | 166          | 108  | 1000  | 5237                        | 241    | 34649             | 1416   |                  |                                |        |
| 615 – 775                   | 178                                                                                   | 704 | 881 | 69                                                       | 23                                                    | 0       | 248 | 390           | 200          | 70   | 1000  | 4845                        | 194    | 40836             | 1632   |                  |                                |        |
| 775 – 950                   | 215                                                                                   | 658 | 873 | 156                                                      | 64                                                    | 35      | 174 | 292           | 145          | 134  | 1000  | 2873                        | 100    | 22606             | 863    |                  |                                |        |
| 950 +                       | 140                                                                                   | 749 | 889 | 45                                                       | 10                                                    | 0       | 54  | 543           | 126          | 221  | 1000  | 3009                        | 115    | 26991             | 1134   |                  |                                |        |
| all                         | 179                                                                                   | 645 | 824 | 125                                                      | 34                                                    | 11      | 272 | 307           | 144          | 107  | 1000  | 56241                       | 1987   | 319377            | 11838  |                  |                                |        |
| social group:               |                                                                                       |     |     |                                                          |                                                       |         |     |               |              |      |       |                             |        |                   |        |                  |                                |        |
| ST                          | 248                                                                                   | 502 | 749 | 213                                                      | 18                                                    | 2       | 278 | 197           | 174          | 118  | 1000  | 4892                        | 258    | 19511             | 1034   |                  |                                |        |
| SC                          | 200                                                                                   | 600 | 800 | 146                                                      | 23                                                    | 0       | 348 | 270           | 103          | 110  | 1000  | 13647                       | 416    | 68068             | 2261   |                  |                                |        |
| OBC                         | 165                                                                                   | 663 | 828 | 93                                                       | 42                                                    | 6       | 266 | 325           | 160          | 108  | 1000  | 22554                       | 775    | 131074            | 4821   |                  |                                |        |
| others                      | 171                                                                                   | 679 | 850 | 125                                                      | 39                                                    | 30      | 210 | 350           | 148          | 98   | 1000  | 15147                       | 538    | 100724            | 3722   |                  |                                |        |
| all                         | 179                                                                                   | 645 | 824 | 125                                                      | 34                                                    | 11      | 272 | 307           | 144          | 107  | 1000  | 56241                       | 1987   | 319377            | 11838  |                  |                                |        |

Table (41): Number per 1000 of spells of ailment during last 15 days treated on medical advice and per 1000 distribution of untreated spells of ailments not given medical treatment by reason for not taking treatment for each mpce class and social-group

| mpce class/<br>social group | number per 1000 of spells ailments treated on medical advice during last 15 days from |         |     | spells of ailments not given medical treatment by reason |                                                       |              |                  |                                |        |      | untreated spells of ailment |                | spells of ailment |                |        |
|-----------------------------|---------------------------------------------------------------------------------------|---------|-----|----------------------------------------------------------|-------------------------------------------------------|--------------|------------------|--------------------------------|--------|------|-----------------------------|----------------|-------------------|----------------|--------|
|                             | government                                                                            | private | all | no medical facilities available in the neighbourhood     | facilities available but no treatment sought owing to |              |                  |                                |        | n.r. | total                       | estd. no. (00) | sample            | estd. no. (00) | sample |
|                             |                                                                                       |         |     |                                                          | lack of faith                                         | long waiting | financial reason | ailment not considered serious | others |      |                             |                |                   |                |        |
|                             |                                                                                       |         |     |                                                          |                                                       |              |                  |                                |        |      |                             |                |                   |                |        |
| (1)                         | (2)                                                                                   | (3)     | (4) | (5)                                                      | (6)                                                   | (7)          | (8)              | (9)                            | (10)   | (11) | (12)                        | (13)           | (14)              | (15)           | (16)   |
| 0 – 225                     | 246                                                                                   | 545     | 791 | 131                                                      | 35                                                    | 0            | 405              | 196                            | 170    | 64   | 1000                        | 2853           | 83                | 13676          | 420    |
| 225 – 255                   | 235                                                                                   | 518     | 753 | 80                                                       | 51                                                    | 0            | 357              | 374                            | 61     | 78   | 1000                        | 2291           | 82                | 9287           | 318    |
| 255 – 300                   | 212                                                                                   | 554     | 766 | 114                                                      | 38                                                    | 7            | 409              | 248                            | 100    | 83   | 1000                        | 5756           | 187               | 24627          | 779    |
| 300 – 340                   | 187                                                                                   | 566     | 753 | 42                                                       | 21                                                    | 0            | 316              | 307                            | 185    | 129  | 1000                        | 5439           | 162               | 22035          | 765    |
| 340 – 380                   | 160                                                                                   | 626     | 786 | 103                                                      | 16                                                    | 1            | 375              | 261                            | 153    | 91   | 1000                        | 6210           | 173               | 28996          | 973    |
| 380 – 420                   | 177                                                                                   | 640     | 817 | 186                                                      | 9                                                     | 0            | 356              | 327                            | 71     | 51   | 1000                        | 5599           | 176               | 30553          | 1054   |
| 420 – 470                   | 170                                                                                   | 644     | 814 | 100                                                      | 50                                                    | 15           | 213              | 364                            | 211    | 48   | 1000                        | 6678           | 227               | 35942          | 1216   |
| 470 – 525                   | 189                                                                                   | 642     | 831 | 130                                                      | 13                                                    | 12           | 289              | 320                            | 153    | 82   | 1000                        | 6386           | 224               | 37794          | 1315   |
| 525 – 615                   | 192                                                                                   | 617     | 809 | 106                                                      | 27                                                    | 3            | 220              | 422                            | 167    | 55   | 1000                        | 6900           | 248               | 36180          | 1382   |
| 615 – 775                   | 193                                                                                   | 664     | 857 | 75                                                       | 10                                                    | 23           | 236              | 346                            | 189    | 121  | 1000                        | 6079           | 218               | 42567          | 1706   |
| 775 – 950                   | 191                                                                                   | 690     | 881 | 145                                                      | 32                                                    | 7            | 179              | 401                            | 167    | 69   | 1000                        | 3127           | 110               | 26282          | 960    |
| 950 +                       | 176                                                                                   | 722     | 897 | 48                                                       | 33                                                    | 5            | 131              | 440                            | 146    | 197  | 1000                        | 3450           | 134               | 33574          | 1285   |
| all                         | 188                                                                                   | 634     | 822 | 106                                                      | 26                                                    | 7            | 290              | 333                            | 153    | 86   | 1000                        | 60768          | 2024              | 341512         | 12173  |
| social group:               |                                                                                       |         |     |                                                          |                                                       |              |                  |                                |        |      |                             |                |                   |                |        |
| ST                          | 250                                                                                   | 532     | 782 | 183                                                      | 0                                                     | 4            | 361              | 230                            | 152    | 69   | 1000                        | 5073           | 235               | 23253          | 1022   |
| SC                          | 217                                                                                   | 579     | 796 | 120                                                      | 26                                                    | 2            | 382              | 294                            | 141    | 35   | 1000                        | 14627          | 429               | 71568          | 2340   |
| OBC                         | 175                                                                                   | 658     | 833 | 68                                                       | 24                                                    | 5            | 249              | 408                            | 147    | 99   | 1000                        | 23760          | 794               | 142093         | 4995   |
| others                      | 173                                                                                   | 662     | 835 | 123                                                      | 37                                                    | 14           | 245              | 292                            | 170    | 118  | 1000                        | 17308          | 566               | 104598         | 3816   |
| all                         | 188                                                                                   | 634     | 822 | 106                                                      | 26                                                    | 7            | 290              | 333                            | 153    | 86   | 1000                        | 60768          | 2024              | 341512         | 12173  |

Table (41): Number per 1000 of spells of ailment during last 15 days treated on medical advice and per 1000 distribution of untreated spells of ailments not given medical treatment by reason for not taking treatment for each mpce class and social-group

| mpce class/<br>social group | number per 1000 of spells ailments treated on medical advice during last 15 days from |         |     | spells of ailments not given medical treatment by reason |                                                       |              |                  |                                |        |      |       | untreated spells of ailment |        | spells of ailment |        |
|-----------------------------|---------------------------------------------------------------------------------------|---------|-----|----------------------------------------------------------|-------------------------------------------------------|--------------|------------------|--------------------------------|--------|------|-------|-----------------------------|--------|-------------------|--------|
|                             | government                                                                            | private | all | no medical facilities available in the neighbourhood     | facilities available but no treatment sought owing to |              |                  |                                |        | n.r. | total | estd. no. (00)              | sample | estd. no. (00)    | sample |
|                             |                                                                                       |         |     |                                                          | lack of faith                                         | long waiting | financial reason | ailment not considered serious | others |      |       |                             |        |                   |        |
|                             |                                                                                       |         |     |                                                          |                                                       |              |                  |                                |        |      |       |                             |        |                   |        |
| (1)                         | (2)                                                                                   | (3)     | (4) | (5)                                                      | (6)                                                   | (7)          | (8)              | (9)                            | (10)   | (11) | (12)  | (13)                        | (14)   | (15)              | (16)   |
| 0 – 225                     | 225                                                                                   | 534     | 759 | 188                                                      | 43                                                    | 0            | 420              | 120                            | 138    | 91   | 1000  | 6750                        | 191    | 27976             | 871    |
| 225 – 255                   | 204                                                                                   | 575     | 779 | 74                                                       | 54                                                    | 0            | 344              | 294                            | 111    | 124  | 1000  | 4143                        | 155    | 18741             | 630    |
| 255 – 300                   | 200                                                                                   | 577     | 777 | 72                                                       | 36                                                    | 7            | 378              | 282                            | 107    | 119  | 1000  | 10693                       | 358    | 47850             | 1558   |
| 300 – 340                   | 198                                                                                   | 558     | 757 | 96                                                       | 19                                                    | 0            | 341              | 281                            | 177    | 85   | 1000  | 10683                       | 317    | 43900             | 1498   |
| 340 – 380                   | 170                                                                                   | 626     | 796 | 119                                                      | 21                                                    | 0            | 393              | 260                            | 125    | 81   | 1000  | 11505                       | 350    | 56408             | 1894   |
| 380 – 420                   | 177                                                                                   | 629     | 805 | 158                                                      | 19                                                    | 13           | 298              | 308                            | 112    | 93   | 1000  | 11837                       | 374    | 60834             | 2123   |
| 420 – 470                   | 182                                                                                   | 638     | 820 | 121                                                      | 37                                                    | 11           | 202              | 395                            | 167    | 66   | 1000  | 12253                       | 435    | 68085             | 2414   |
| 470 – 525                   | 165                                                                                   | 650     | 814 | 144                                                      | 38                                                    | 24           | 250              | 301                            | 159    | 84   | 1000  | 13625                       | 471    | 73412             | 2645   |
| 525 – 615                   | 188                                                                                   | 641     | 829 | 115                                                      | 31                                                    | 3            | 223              | 384                            | 167    | 78   | 1000  | 12137                       | 489    | 70828             | 2798   |
| 615 – 775                   | 186                                                                                   | 683     | 869 | 72                                                       | 16                                                    | 13           | 241              | 365                            | 194    | 98   | 1000  | 10925                       | 412    | 83403             | 3338   |
| 775 – 950                   | 202                                                                                   | 676     | 877 | 150                                                      | 47                                                    | 21           | 177              | 349                            | 156    | 100  | 1000  | 6000                        | 210    | 48888             | 1823   |
| 950 +                       | 160                                                                                   | 734     | 893 | 47                                                       | 23                                                    | 2            | 95               | 488                            | 137    | 208  | 1000  | 6459                        | 249    | 60565             | 2419   |
| all                         | 184                                                                                   | 639     | 823 | 115                                                      | 30                                                    | 9            | 281              | 321                            | 148    | 96   | 1000  | 117009                      | 4011   | 660890            | 24011  |
| social group:               |                                                                                       |         |     |                                                          |                                                       |              |                  |                                |        |      |       |                             |        |                   |        |
| ST                          | 249                                                                                   | 518     | 767 | 198                                                      | 9                                                     | 3            | 321              | 213                            | 163    | 93   | 1000  | 9965                        | 493    | 42764             | 2056   |
| SC                          | 209                                                                                   | 589     | 798 | 133                                                      | 24                                                    | 1            | 366              | 283                            | 123    | 71   | 1000  | 28274                       | 845    | 139636            | 4601   |
| OBC                         | 170                                                                                   | 660     | 830 | 80                                                       | 33                                                    | 6            | 258              | 368                            | 153    | 103  | 1000  | 46315                       | 1569   | 273167            | 9816   |
| others                      | 172                                                                                   | 670     | 842 | 124                                                      | 38                                                    | 21           | 229              | 319                            | 160    | 109  | 1000  | 32455                       | 1104   | 205322            | 7538   |
| all                         | 184                                                                                   | 639     | 823 | 115                                                      | 30                                                    | 9            | 281              | 321                            | 148    | 96   | 1000  | 117009                      | 4011   | 660890            | 24011  |



Table (41): Number per 1000 of spells of ailment during last 15 days treated on medical advice and per 1000 distribution of untreated spells of ailments not given medical treatment by reason for not taking treatment for each mpce class and social-group

| mpce class/<br>social group | number per 1000 of spells ailments treated on medical advice during last 15 days from |         |     | spells of ailments not given medical treatment by reason |                                                       |              |                  |                                |      |       | untreated spells of ailment |        | spells of ailment |        |        |
|-----------------------------|---------------------------------------------------------------------------------------|---------|-----|----------------------------------------------------------|-------------------------------------------------------|--------------|------------------|--------------------------------|------|-------|-----------------------------|--------|-------------------|--------|--------|
|                             |                                                                                       |         |     | no medical facilities available in the neighbourhood     | facilities available but no treatment sought owing to |              |                  |                                | n.r. | total | estd. no. (00)              | sample | estd. no. (00)    | sample |        |
|                             | government                                                                            | private | all |                                                          | lack of faith                                         | long waiting | financial reason | ailment not considered serious |      |       |                             |        |                   |        | others |
|                             |                                                                                       |         |     |                                                          |                                                       |              |                  |                                |      |       |                             |        |                   |        |        |
| All-India                   |                                                                                       |         |     | Urban                                                    |                                                       |              |                  |                                |      |       |                             |        | Males             |        |        |
| 0-300                       | 217                                                                                   | 620     | 837 | 6                                                        | 32                                                    | 0            | 372              | 428                            | 111  | 52    | 1000                        | 512    | 33                | 3134   | 163    |
| 300-350                     | 181                                                                                   | 675     | 856 | 0                                                        | 136                                                   | 2            | 310              | 473                            | 45   | 34    | 1000                        | 469    | 18                | 3248   | 129    |
| 350-425                     | 200                                                                                   | 663     | 863 | 0                                                        | 3                                                     | 10           | 297              | 322                            | 151  | 217   | 1000                        | 919    | 66                | 6690   | 364    |
| 425-500                     | 202                                                                                   | 657     | 859 | 19                                                       | 20                                                    | 11           | 310              | 480                            | 68   | 91    | 1000                        | 1766   | 108               | 12528  | 726    |
| 500-575                     | 224                                                                                   | 685     | 909 | 0                                                        | 4                                                     | 7            | 247              | 538                            | 106  | 97    | 1000                        | 552    | 53                | 6039   | 383    |
| 575-665                     | 251                                                                                   | 601     | 852 | 0                                                        | 2                                                     | 6            | 275              | 423                            | 140  | 154   | 1000                        | 1281   | 80                | 8641   | 532    |
| 665-775                     | 153                                                                                   | 761     | 914 | 52                                                       | 9                                                     | 0            | 161              | 384                            | 196  | 196   | 1000                        | 1206   | 90                | 14040  | 799    |
| 775-915                     | 216                                                                                   | 697     | 913 | 10                                                       | 45                                                    | 8            | 158              | 495                            | 117  | 166   | 1000                        | 1067   | 81                | 12207  | 775    |
| 915-1120                    | 192                                                                                   | 718     | 910 | 0                                                        | 0                                                     | 5            | 59               | 778                            | 34   | 124   | 1000                        | 1468   | 82                | 16341  | 913    |
| 1120-1500                   | 118                                                                                   | 788     | 906 | 2                                                        | 7                                                     | 8            | 74               | 655                            | 173  | 82    | 1000                        | 1984   | 108               | 21069  | 1093   |
| 1500-1925                   | 171                                                                                   | 720     | 891 | 0                                                        | 19                                                    | 16           | 0                | 885                            | 0    | 81    | 1000                        | 644    | 32                | 5914   | 381    |
| 1925+                       | 96                                                                                    | 840     | 936 | 0                                                        | 4                                                     | 0            | 13               | 498                            | 228  | 258   | 1000                        | 934    | 60                | 14701  | 727    |
| all                         | 172                                                                                   | 725     | 897 | 9                                                        | 17                                                    | 6            | 176              | 538                            | 120  | 133   | 1000                        | 12802  | 811               | 124552 | 6985   |
| social group:               |                                                                                       |         |     |                                                          |                                                       |              |                  |                                |      |       |                             |        |                   |        |        |
| ST                          | 205                                                                                   | 689     | 895 | 39                                                       | 2                                                     | 4            | 129              | 384                            | 373  | 69    | 1000                        | 199    | 54                | 1890   | 254    |
| SC                          | 208                                                                                   | 655     | 863 | 1                                                        | 37                                                    | 7            | 330              | 469                            | 104  | 52    | 1000                        | 2360   | 135               | 17238  | 914    |
| OBC                         | 188                                                                                   | 716     | 904 | 0                                                        | 24                                                    | 14           | 142              | 524                            | 102  | 194   | 1000                        | 3922   | 271               | 40801  | 2403   |
| others                      | 152                                                                                   | 750     | 902 | 16                                                       | 5                                                     | 2            | 141              | 578                            | 130  | 128   | 1000                        | 6321   | 351               | 64623  | 3414   |
| all                         | 172                                                                                   | 725     | 897 | 9                                                        | 17                                                    | 6            | 176              | 538                            | 120  | 133   | 1000                        | 12802  | 811               | 124552 | 6985   |

Table (41): Number per 1000 of spells of ailment during last 15 days treated on medical advice and per 1000 distribution of untreated spells of ailments not given medical treatment by reason for not taking treatment for each mpce class and social-group

| mpce class/<br>social group | number per 1000 of spells<br>ailments treated on medical<br>advice during last 15 days<br>from |         |     | spells of ailments not given medical treatment by reason              |                                                       |                 |                     |                                      |      |       | untreated spells of<br>ailment |        | spells of ailment    |        |        |
|-----------------------------|------------------------------------------------------------------------------------------------|---------|-----|-----------------------------------------------------------------------|-------------------------------------------------------|-----------------|---------------------|--------------------------------------|------|-------|--------------------------------|--------|----------------------|--------|--------|
|                             |                                                                                                |         |     | no medical<br>facilities<br>available in<br>the<br>neighbour-<br>hood | facilities available but no treatment sought owing to |                 |                     |                                      | n.r. | total | estd.<br>no.<br>(00)           | sample | estd.<br>no.<br>(00) | sample |        |
|                             | government                                                                                     | private | all |                                                                       | lack of<br>faith                                      | long<br>waiting | financial<br>reason | ailment not<br>considered<br>serious |      |       |                                |        |                      |        | others |
| (1)                         | (2)                                                                                            | (3)     | (4) | (5)                                                                   | (6)                                                   | (7)             | (8)                 | (9)                                  | (10) | (11)  | (12)                           | (13)   | (14)                 | (15)   | (16)   |
| 0-300                       | 187                                                                                            | 534     | 721 | 4                                                                     | 8                                                     | 0               | 408                 | 337                                  | 193  | 49    | 1000                           | 777    | 47                   | 2788   | 163    |
| 300-350                     | 194                                                                                            | 703     | 897 | 95                                                                    | 0                                                     | 31              | 577                 | 204                                  | 16   | 77    | 1000                           | 309    | 26                   | 2996   | 152    |
| 350-425                     | 231                                                                                            | 602     | 833 | 0                                                                     | 21                                                    | 0               | 386                 | 414                                  | 117  | 63    | 1000                           | 1196   | 67                   | 7165   | 401    |
| 425-500                     | 230                                                                                            | 619     | 848 | 11                                                                    | 19                                                    | 2               | 312                 | 401                                  | 189  | 66    | 1000                           | 2085   | 117                  | 13742  | 777    |
| 500-575                     | 190                                                                                            | 694     | 884 | 37                                                                    | 53                                                    | 43              | 327                 | 359                                  | 17   | 163   | 1000                           | 752    | 53                   | 6470   | 390    |
| 575-665                     | 204                                                                                            | 667     | 872 | 0                                                                     | 2                                                     | 41              | 325                 | 371                                  | 147  | 114   | 1000                           | 1420   | 95                   | 11064  | 607    |
| 665-775                     | 157                                                                                            | 741     | 898 | 12                                                                    | 43                                                    | 78              | 194                 | 351                                  | 166  | 156   | 1000                           | 1690   | 106                  | 16641  | 910    |
| 775-915                     | 178                                                                                            | 732     | 910 | 80                                                                    | 64                                                    | 9               | 261                 | 352                                  | 123  | 110   | 1000                           | 1232   | 101                  | 13655  | 881    |
| 915-1120                    | 152                                                                                            | 742     | 893 | 7                                                                     | 19                                                    | 12              | 172                 | 570                                  | 95   | 123   | 1000                           | 1893   | 107                  | 17770  | 1047   |
| 1120-1500                   | 162                                                                                            | 724     | 886 | 1                                                                     | 3                                                     | 45              | 59                  | 604                                  | 140  | 147   | 1000                           | 2382   | 128                  | 20930  | 1226   |
| 1500-1925                   | 136                                                                                            | 750     | 886 | 0                                                                     | 0                                                     | 0               | 65                  | 714                                  | 61   | 160   | 1000                           | 775    | 40                   | 6810   | 426    |
| 1925+                       | 110                                                                                            | 844     | 954 | 0                                                                     | 5                                                     | 0               | 0                   | 780                                  | 102  | 113   | 1000                           | 806    | 48                   | 17392  | 827    |
| all                         | 170                                                                                            | 718     | 889 | 14                                                                    | 21                                                    | 25              | 227                 | 469                                  | 130  | 115   | 1000                           | 15318  | 935                  | 137425 | 7807   |
| social group:               |                                                                                                |         |     |                                                                       |                                                       |                 |                     |                                      |      |       |                                |        |                      |        |        |
| ST                          | 320                                                                                            | 542     | 862 | 369                                                                   | 1                                                     | 5               | 93                  | 319                                  | 131  | 81    | 1000                           | 268    | 52                   | 1944   | 284    |
| SC                          | 208                                                                                            | 663     | 871 | 17                                                                    | 10                                                    | 32              | 373                 | 336                                  | 180  | 53    | 1000                           | 2409   | 144                  | 18635  | 972    |
| OBC                         | 176                                                                                            | 700     | 876 | 5                                                                     | 30                                                    | 43              | 270                 | 420                                  | 121  | 112   | 1000                           | 5450   | 355                  | 44013  | 2690   |
| others                      | 153                                                                                            | 748     | 901 | 7                                                                     | 18                                                    | 9               | 152                 | 556                                  | 119  | 139   | 1000                           | 7191   | 384                  | 72833  | 3861   |
| all                         | 170                                                                                            | 718     | 889 | 14                                                                    | 21                                                    | 25              | 227                 | 469                                  | 130  | 115   | 1000                           | 15318  | 935                  | 137425 | 7807   |

Table (41): Number per 1000 of spells of ailment during last 15 days treated on medical advice and per 1000 distribution of untreated spells of ailments not given medical treatment by reason for not taking treatment for each mpce class and social-group

| All-India                   |                                                                                       |         |     | Urban                                                    |                                                       |              |                  |                                |        |      |       | Persons                     |        |                   |        |
|-----------------------------|---------------------------------------------------------------------------------------|---------|-----|----------------------------------------------------------|-------------------------------------------------------|--------------|------------------|--------------------------------|--------|------|-------|-----------------------------|--------|-------------------|--------|
| mpce class/<br>social group | number per 1000 of spells ailments treated on medical advice during last 15 days from |         |     | spells of ailments not given medical treatment by reason |                                                       |              |                  |                                |        |      |       | untreated spells of ailment |        | spells of ailment |        |
|                             | government                                                                            | private | all | no medical facilities available in the neighbourhood     | facilities available but no treatment sought owing to |              |                  |                                |        | n.r. | total | estd. no. (00)              | sample | estd. no. (00)    | sample |
|                             |                                                                                       |         |     |                                                          | lack of faith                                         | long waiting | financial reason | ailment not considered serious | others |      |       |                             |        |                   |        |
| (1)                         | (2)                                                                                   | (3)     | (4) | (5)                                                      | (6)                                                   | (7)          | (8)              | (9)                            | (10)   | (11) | (12)  | (13)                        | (14)   | (15)              | (16)   |
| 0-300                       | 203                                                                                   | 579     | 782 | 5                                                        | 17                                                    | 0            | 394              | 373                            | 160    | 50   | 1000  | 1289                        | 80     | 5922              | 326    |
| 300-350                     | 187                                                                                   | 688     | 875 | 38                                                       | 82                                                    | 13           | 416              | 366                            | 34     | 51   | 1000  | 779                         | 44     | 6245              | 281    |
| 350-425                     | 216                                                                                   | 631     | 847 | 0                                                        | 13                                                    | 4            | 347              | 374                            | 131    | 130  | 1000  | 2115                        | 133    | 13854             | 765    |
| 425-500                     | 216                                                                                   | 637     | 853 | 15                                                       | 20                                                    | 6            | 311              | 437                            | 134    | 78   | 1000  | 3852                        | 225    | 26270             | 1503   |
| 500-575                     | 206                                                                                   | 690     | 896 | 22                                                       | 32                                                    | 28           | 293              | 435                            | 55     | 135  | 1000  | 1304                        | 106    | 12509             | 773    |
| 575-665                     | 225                                                                                   | 638     | 863 | 0                                                        | 2                                                     | 24           | 301              | 396                            | 144    | 133  | 1000  | 2701                        | 175    | 19705             | 1139   |
| 665-775                     | 155                                                                                   | 750     | 906 | 29                                                       | 29                                                    | 46           | 180              | 365                            | 178    | 173  | 1000  | 2896                        | 196    | 30682             | 1709   |
| 775-915                     | 196                                                                                   | 715     | 911 | 48                                                       | 56                                                    | 9            | 213              | 418                            | 120    | 136  | 1000  | 2299                        | 182    | 25862             | 1656   |
| 915-1120                    | 171                                                                                   | 730     | 901 | 4                                                        | 11                                                    | 9            | 123              | 661                            | 68     | 124  | 1000  | 3361                        | 189    | 34111             | 1960   |
| 1120-1500                   | 140                                                                                   | 756     | 896 | 1                                                        | 5                                                     | 28           | 66               | 627                            | 155    | 117  | 1000  | 4366                        | 236    | 42000             | 2319   |
| 1500-1925                   | 152                                                                                   | 736     | 889 | 0                                                        | 9                                                     | 7            | 36               | 791                            | 33     | 124  | 1000  | 1419                        | 72     | 12724             | 807    |
| 1925+                       | 103                                                                                   | 842     | 946 | 0                                                        | 4                                                     | 0            | 7                | 629                            | 169    | 191  | 1000  | 1739                        | 108    | 32093             | 1554   |
| all                         | 171                                                                                   | 721     | 893 | 12                                                       | 19                                                    | 16           | 204              | 500                            | 125    | 123  | 1000  | 28120                       | 1746   | 261977            | 14792  |
| social group:               |                                                                                       |         |     |                                                          |                                                       |              |                  |                                |        |      |       |                             |        |                   |        |
| ST                          | 264                                                                                   | 614     | 878 | 228                                                      | 2                                                     | 5            | 109              | 347                            | 234    | 76   | 1000  | 467                         | 106    | 3834              | 538    |
| SC                          | 208                                                                                   | 659     | 867 | 9                                                        | 23                                                    | 19           | 352              | 402                            | 143    | 52   | 1000  | 4769                        | 279    | 35873             | 1886   |
| OBC                         | 182                                                                                   | 708     | 890 | 3                                                        | 27                                                    | 31           | 216              | 463                            | 113    | 146  | 1000  | 9372                        | 626    | 84814             | 5093   |
| others                      | 153                                                                                   | 749     | 902 | 12                                                       | 12                                                    | 6            | 147              | 566                            | 124    | 134  | 1000  | 13512                       | 735    | 137456            | 7275   |
| all                         | 171                                                                                   | 721     | 893 | 12                                                       | 19                                                    | 16           | 204              | 500                            | 125    | 123  | 1000  | 28120                       | 1746   | 261977            | 14792  |

Table (41): Number per 1000 of spells of ailment during last 15 days treated on medical advice and per 1000 distribution of untreated spells of ailments not given medical treatment by reason for not taking treatment for each mpce class and social-group

| All-India                   |                                                                                                |         |     | Rural + Urban                                                         |                                                       |                 |                     |                                      |        |      |       | Males                          |        |                   |        |
|-----------------------------|------------------------------------------------------------------------------------------------|---------|-----|-----------------------------------------------------------------------|-------------------------------------------------------|-----------------|---------------------|--------------------------------------|--------|------|-------|--------------------------------|--------|-------------------|--------|
| mpce class/<br>social group | number per 1000 of spells<br>ailments treated on medical<br>advice during last 15 days<br>from |         |     | spells of ailments not given medical treatment by reason              |                                                       |                 |                     |                                      |        |      |       | untreated spells of<br>ailment |        | spells of ailment |        |
|                             |                                                                                                |         |     | no medical<br>facilities<br>available in<br>the<br>neighbour-<br>hood | facilities available but no treatment sought owing to |                 |                     |                                      |        | n.r. | total | estd.<br>no. (00)              | sample | estd.<br>no. (00) | sample |
|                             | government                                                                                     | private | all |                                                                       | lack of<br>faith                                      | long<br>waiting | financial<br>reason | ailment not<br>considered<br>serious | others |      |       |                                |        |                   |        |
| (1)                         | (2)                                                                                            | (3)     | (4) | (5)                                                                   | (6)                                                   | (7)             | (8)                 | (9)                                  | (10)   | (11) | (12)  | (13)                           | (14)   | (15)              | (16)   |
| 0 – 235                     | 207                                                                                            | 540     | 747 | 203                                                                   | 47                                                    | 0               | 424                 | 107                                  | 115    | 104  | 1000  | 4410                           | 141    | 17434             | 614    |
| 235 – 265                   | 176                                                                                            | 641     | 817 | 53                                                                    | 74                                                    | 0               | 325                 | 251                                  | 146    | 151  | 1000  | 2321                           | 91     | 12703             | 441    |
| 265 – 320                   | 189                                                                                            | 615     | 804 | 18                                                                    | 29                                                    | 8               | 334                 | 321                                  | 121    | 170  | 1000  | 5856                           | 237    | 29912             | 1143   |
| 320 – 365                   | 207                                                                                            | 589     | 796 | 119                                                                   | 18                                                    | 3               | 354                 | 311                                  | 143    | 53   | 1000  | 7010                           | 263    | 34392             | 1459   |
| 365 – 410                   | 189                                                                                            | 637     | 825 | 126                                                                   | 24                                                    | 1               | 398                 | 285                                  | 94     | 72   | 1000  | 5846                           | 230    | 33451             | 1304   |
| 410 – 460                   | 193                                                                                            | 614     | 807 | 111                                                                   | 24                                                    | 21              | 250                 | 313                                  | 147    | 134  | 1000  | 7519                           | 278    | 38923             | 1601   |
| 460 – 520                   | 182                                                                                            | 672     | 853 | 130                                                                   | 19                                                    | 5               | 184                 | 425                                  | 129    | 107  | 1000  | 6781                           | 298    | 46183             | 1997   |
| 520 – 605                   | 159                                                                                            | 668     | 826 | 137                                                                   | 58                                                    | 31              | 209                 | 311                                  | 158    | 96   | 1000  | 8306                           | 328    | 47824             | 2105   |
| 605 – 730                   | 186                                                                                            | 682     | 868 | 99                                                                    | 28                                                    | 3               | 191                 | 431                                  | 137    | 111  | 1000  | 6705                           | 323    | 50990             | 2329   |
| 730 – 980                   | 157                                                                                            | 732     | 890 | 49                                                                    | 19                                                    | 2               | 197                 | 467                                  | 192    | 73   | 1000  | 6829                           | 302    | 61906             | 2725   |
| 980 – 1285                  | 206                                                                                            | 671     | 877 | 127                                                                   | 56                                                    | 31              | 142                 | 401                                  | 119    | 124  | 1000  | 3517                           | 132    | 28520             | 1244   |
| 1285 +                      | 124                                                                                            | 781     | 905 | 35                                                                    | 9                                                     | 0               | 44                  | 532                                  | 150    | 230  | 1000  | 3942                           | 175    | 41692             | 1861   |
| all                         | 177                                                                                            | 667     | 844 | 103                                                                   | 31                                                    | 10              | 254                 | 350                                  | 140    | 112  | 1000  | 69043                          | 2798   | 443929            | 18823  |
| social group:               |                                                                                                |         |     |                                                                       |                                                       |                 |                     |                                      |        |      |       |                                |        |                   |        |
| ST                          | 244                                                                                            | 518     | 762 | 206                                                                   | 17                                                    | 2               | 272                 | 204                                  | 182    | 116  | 1000  | 5092                           | 312    | 21401             | 1288   |
| SC                          | 202                                                                                            | 611     | 812 | 125                                                                   | 25                                                    | 1               | 345                 | 299                                  | 103    | 101  | 1000  | 16007                          | 551    | 85306             | 3175   |
| OBC                         | 170                                                                                            | 676     | 846 | 79                                                                    | 39                                                    | 7               | 248                 | 355                                  | 151    | 121  | 1000  | 26476                          | 1046   | 171875            | 7224   |
| others                      | 164                                                                                            | 707     | 870 | 93                                                                    | 29                                                    | 22              | 190                 | 417                                  | 143    | 107  | 1000  | 21468                          | 889    | 165347            | 7136   |
| all                         | 177                                                                                            | 667     | 844 | 103                                                                   | 31                                                    | 10              | 254                 | 350                                  | 140    | 112  | 1000  | 69043                          | 2798   | 443929            | 18823  |

Table (41): Number per 1000 of spells of ailment during last 15 days treated on medical advice and per 1000 distribution of untreated spells of ailments not given medical treatment by reason for not taking treatment for each mpce class and social-group

| All-India                   |                                                                                       |         |     | Rural + Urban                                            |                                                       |              |                  |                                |        |      |       | Females                     |        |                   |        |
|-----------------------------|---------------------------------------------------------------------------------------|---------|-----|----------------------------------------------------------|-------------------------------------------------------|--------------|------------------|--------------------------------|--------|------|-------|-----------------------------|--------|-------------------|--------|
| mpce class/<br>social group | number per 1000 of spells ailments treated on medical advice during last 15 days from |         |     | spells of ailments not given medical treatment by reason |                                                       |              |                  |                                |        |      |       | untreated spells of ailment |        | spells of ailment |        |
|                             | government                                                                            | private | all | no medical facilities available in the neighbourhood     | facilities available but no treatment sought owing to |              |                  |                                |        | n.r. | total | estd. no. (00)              | sample | estd. no. (00)    | sample |
|                             |                                                                                       |         |     |                                                          | lack of faith                                         | long waiting | financial reason | ailment not considered serious | others |      |       |                             |        |                   |        |
| (1)                         | (2)                                                                                   | (3)     | (4) | (5)                                                      | (6)                                                   | (7)          | (8)              | (9)                            | (10)   | (11) | (12)  | (13)                        | (14)   | (15)              | (16)   |
| 0 – 235                     | 236                                                                                   | 543     | 780 | 104                                                      | 29                                                    | 0            | 405              | 226                            | 175    | 61   | 1000  | 3630                        | 130    | 16464             | 583    |
| 235 – 265                   | 225                                                                                   | 563     | 788 | 82                                                       | 45                                                    | 4            | 383              | 354                            | 56     | 78   | 1000  | 2600                        | 108    | 12283             | 470    |
| 265 – 320                   | 217                                                                                   | 565     | 781 | 95                                                       | 35                                                    | 5            | 405              | 277                            | 103    | 80   | 1000  | 6952                        | 254    | 31792             | 1180   |
| 320 – 365                   | 203                                                                                   | 586     | 790 | 33                                                       | 21                                                    | 0            | 315              | 333                            | 186    | 112  | 1000  | 7525                        | 279    | 35777             | 1542   |
| 365 – 410                   | 165                                                                                   | 639     | 804 | 96                                                       | 20                                                    | 5            | 369              | 272                            | 139    | 99   | 1000  | 6963                        | 226    | 35466             | 1363   |
| 410 – 460                   | 184                                                                                   | 647     | 831 | 148                                                      | 8                                                     | 8            | 350              | 336                            | 86     | 64   | 1000  | 7019                        | 271    | 41617             | 1661   |
| 460 – 520                   | 166                                                                                   | 675     | 841 | 82                                                       | 49                                                    | 28           | 209              | 361                            | 202    | 70   | 1000  | 8367                        | 333    | 52583             | 2126   |
| 520 – 605                   | 186                                                                                   | 666     | 852 | 122                                                      | 22                                                    | 12           | 285              | 325                            | 148    | 87   | 1000  | 7618                        | 325    | 51450             | 2196   |
| 605 – 730                   | 179                                                                                   | 658     | 837 | 85                                                       | 25                                                    | 5            | 210              | 454                            | 152    | 70   | 1000  | 8793                        | 355    | 53950             | 2429   |
| 730 – 980                   | 183                                                                                   | 684     | 867 | 54                                                       | 8                                                     | 30           | 186              | 418                            | 175    | 129  | 1000  | 8461                        | 346    | 63497             | 2932   |
| 980 – 1285                  | 179                                                                                   | 703     | 882 | 117                                                      | 26                                                    | 6            | 156              | 463                            | 146    | 87   | 1000  | 3901                        | 150    | 33092             | 1386   |
| 1285 +                      | 153                                                                                   | 763     | 916 | 39                                                       | 28                                                    | 4            | 106              | 505                            | 137    | 181  | 1000  | 4256                        | 182    | 50967             | 2112   |
| all                         | 183                                                                                   | 658     | 841 | 87                                                       | 25                                                    | 10           | 277              | 360                            | 148    | 92   | 1000  | 76086                       | 2959   | 478938            | 19980  |
| social group:               |                                                                                       |         |     |                                                          |                                                       |              |                  |                                |        |      |       |                             |        |                   |        |
| ST                          | 256                                                                                   | 532     | 788 | 192                                                      | 0                                                     | 4            | 348              | 234                            | 151    | 70   | 1000  | 5341                        | 287    | 25197             | 1306   |
| SC                          | 215                                                                                   | 596     | 811 | 105                                                      | 23                                                    | 6            | 381              | 300                            | 147    | 37   | 1000  | 17036                       | 573    | 90203             | 3312   |
| OBC                         | 175                                                                                   | 668     | 843 | 56                                                       | 25                                                    | 13           | 253              | 410                            | 142    | 101  | 1000  | 29210                       | 1149   | 186106            | 7685   |
| others                      | 165                                                                                   | 697     | 862 | 89                                                       | 32                                                    | 12           | 218              | 370                            | 155    | 124  | 1000  | 24499                       | 950    | 177431            | 7677   |
| all                         | 183                                                                                   | 658     | 841 | 87                                                       | 25                                                    | 10           | 277              | 360                            | 148    | 92   | 1000  | 76086                       | 2959   | 478938            | 19980  |

Table (41): Number per 1000 of spells of ailment during last 15 days treated on medical advice and per 1000 distribution of untreated spells of ailments not given medical treatment by reason for not taking treatment for each mpce class and social-group

| mpce class/<br>social group | number per 1000 of spells ailments treated on medical advice during last 15 days from |         |     | spells of ailments not given medical treatment by reason |                                                       |              |                  |                                |        |      | untreated spells of ailment |                | spells of ailment |                |        |
|-----------------------------|---------------------------------------------------------------------------------------|---------|-----|----------------------------------------------------------|-------------------------------------------------------|--------------|------------------|--------------------------------|--------|------|-----------------------------|----------------|-------------------|----------------|--------|
|                             | government                                                                            | private | all | no medical facilities available in the neighbourhood     | facilities available but no treatment sought owing to |              |                  |                                |        | n.r. | total                       | estd. no. (00) | sample            | estd. no. (00) | sample |
|                             |                                                                                       |         |     |                                                          | lack of faith                                         | long waiting | financial reason | ailment not considered serious | others |      |                             |                |                   |                |        |
|                             |                                                                                       |         |     |                                                          |                                                       |              |                  |                                |        |      |                             |                |                   |                |        |
| (1)                         | (2)                                                                                   | (3)     | (4) | (5)                                                      | (6)                                                   | (7)          | (8)              | (9)                            | (10)   | (11) | (12)                        | (13)           | (14)              | (15)           | (16)   |
| 0 – 235                     | 221                                                                                   | 542     | 763 | 158                                                      | 39                                                    | 0            | 416              | 160                            | 142    | 84   | 1000                        | 8040           | 271               | 33898          | 1197   |
| 235 – 265                   | 200                                                                                   | 603     | 803 | 68                                                       | 58                                                    | 2            | 356              | 305                            | 99     | 112  | 1000                        | 4921           | 199               | 24985          | 911    |
| 265 – 320                   | 203                                                                                   | 589     | 792 | 60                                                       | 32                                                    | 7            | 373              | 297                            | 111    | 121  | 1000                        | 12808          | 491               | 61704          | 2323   |
| 320 – 365                   | 205                                                                                   | 588     | 793 | 75                                                       | 19                                                    | 2            | 333              | 322                            | 166    | 83   | 1000                        | 14535          | 542               | 70170          | 3001   |
| 365 – 410                   | 177                                                                                   | 638     | 814 | 110                                                      | 22                                                    | 3            | 382              | 278                            | 118    | 87   | 1000                        | 12809          | 456               | 68918          | 2667   |
| 410 – 460                   | 188                                                                                   | 631     | 819 | 129                                                      | 16                                                    | 15           | 298              | 324                            | 118    | 100  | 1000                        | 14538          | 549               | 80540          | 3262   |
| 460 – 520                   | 173                                                                                   | 673     | 847 | 103                                                      | 36                                                    | 18           | 198              | 390                            | 169    | 87   | 1000                        | 15149          | 631               | 98766          | 4123   |
| 520 – 605                   | 173                                                                                   | 667     | 840 | 130                                                      | 41                                                    | 22           | 245              | 318                            | 153    | 92   | 1000                        | 15924          | 653               | 99274          | 4301   |
| 605 – 730                   | 182                                                                                   | 670     | 852 | 91                                                       | 26                                                    | 4            | 202              | 444                            | 146    | 88   | 1000                        | 15498          | 678               | 104940         | 4758   |
| 730 – 980                   | 170                                                                                   | 708     | 878 | 52                                                       | 13                                                    | 17           | 191              | 440                            | 183    | 104  | 1000                        | 15291          | 648               | 125403         | 5657   |
| 980 – 1285                  | 191                                                                                   | 688     | 880 | 122                                                      | 40                                                    | 18           | 150              | 433                            | 133    | 104  | 1000                        | 7418           | 282               | 61612          | 2630   |
| 1285 +                      | 140                                                                                   | 771     | 912 | 37                                                       | 19                                                    | 2            | 76               | 518                            | 144    | 205  | 1000                        | 8198           | 357               | 92658          | 3973   |
| all                         | 180                                                                                   | 663     | 843 | 95                                                       | 28                                                    | 10           | 266              | 355                            | 144    | 101  | 1000                        | 145129         | 5757              | 922867         | 38803  |
| social group:               |                                                                                       |         |     |                                                          |                                                       |              |                  |                                |        |      |                             |                |                   |                |        |
| ST                          | 250                                                                                   | 526     | 776 | 199                                                      | 9                                                     | 3            | 311              | 219                            | 166    | 93   | 1000                        | 10433          | 599               | 46597          | 2594   |
| SC                          | 208                                                                                   | 603     | 812 | 115                                                      | 24                                                    | 4            | 364              | 300                            | 125    | 68   | 1000                        | 33042          | 1124              | 175509         | 6487   |
| OBC                         | 173                                                                                   | 672     | 844 | 67                                                       | 32                                                    | 10           | 251              | 384                            | 146    | 110  | 1000                        | 55687          | 2195              | 357982         | 14909  |
| others                      | 164                                                                                   | 702     | 866 | 91                                                       | 30                                                    | 17           | 205              | 392                            | 149    | 116  | 1000                        | 45967          | 1839              | 342779         | 14813  |
| all                         | 180                                                                                   | 663     | 843 | 95                                                       | 28                                                    | 10           | 266              | 355                            | 144    | 101  | 1000                        | 145129         | 5757              | 922867         | 38803  |

Table (42): Number of spells of ailments receiving treatment from non- government sources per 1000 of treated spells during last 15 days and their distribution by reason for not taking treatment from govt. sources for each mpce class

| mpce class                                        | no. of spells of ailment receiving treatment from non- govt. sources per 1000 treated spells | Rural                                                                                                    |                                                                       |              |                                          |        |       |        | Males                                                         |        |
|---------------------------------------------------|----------------------------------------------------------------------------------------------|----------------------------------------------------------------------------------------------------------|-----------------------------------------------------------------------|--------------|------------------------------------------|--------|-------|--------|---------------------------------------------------------------|--------|
|                                                   |                                                                                              | spells of ailment receiving treatment from non- govt. sources by reason for not using government sources |                                                                       |              |                                          |        |       |        | spells of ailment receiving treatment from non- govt. sources |        |
|                                                   |                                                                                              | gover- nment doctor/ facili- ties too far                                                                | not satisfied with medical treatment by government doctor/ facilities | long waiting | required specific services not available | others | n.r.  | total  | estd. no. (00)                                                | sample |
| (1)                                               | (2)                                                                                          | (3)                                                                                                      | (4)                                                                   | (5)          | (6)                                      | (7)    | (8)   | (9)    | (10)                                                          | (11)   |
| 0 – 225                                           | 719                                                                                          | 246                                                                                                      | 260                                                                   | 42           | 36                                       | 205    | 212   | 1000   | 7478                                                          | 217    |
| 225 – 255                                         | 783                                                                                          | 233                                                                                                      | 356                                                                   | 57           | 34                                       | 139    | 181   | 1000   | 5955                                                          | 168    |
| 255 – 300                                         | 764                                                                                          | 279                                                                                                      | 255                                                                   | 43           | 51                                       | 210    | 162   | 1000   | 13971                                                         | 427    |
| 300 – 340                                         | 725                                                                                          | 254                                                                                                      | 353                                                                   | 26           | 38                                       | 160    | 169   | 1000   | 12042                                                         | 384    |
| 340 – 380                                         | 776                                                                                          | 237                                                                                                      | 410                                                                   | 98           | 37                                       | 105    | 114   | 1000   | 17158                                                         | 544    |
| 380 – 420                                         | 777                                                                                          | 258                                                                                                      | 377                                                                   | 65           | 61                                       | 115    | 122   | 1000   | 18691                                                         | 640    |
| 420 – 470                                         | 765                                                                                          | 254                                                                                                      | 402                                                                   | 55           | 34                                       | 122    | 133   | 1000   | 20330                                                         | 707    |
| 470 – 525                                         | 825                                                                                          | 174                                                                                                      | 430                                                                   | 98           | 40                                       | 130    | 128   | 1000   | 23415                                                         | 813    |
| 525 – 615                                         | 784                                                                                          | 211                                                                                                      | 438                                                                   | 89           | 55                                       | 121    | 87    | 1000   | 23050                                                         | 847    |
| 615 – 775                                         | 798                                                                                          | 185                                                                                                      | 474                                                                   | 82           | 53                                       | 120    | 87    | 1000   | 28733                                                         | 1050   |
| 775 – 950                                         | 754                                                                                          | 122                                                                                                      | 450                                                                   | 123          | 84                                       | 137    | 84    | 1000   | 14882                                                         | 539    |
| 950 +                                             | 843                                                                                          | 141                                                                                                      | 493                                                                   | 110          | 76                                       | 115    | 65    | 1000   | 20209                                                         | 796    |
| all                                               | 783                                                                                          | 210                                                                                                      | 411                                                                   | 79           | 52                                       | 133    | 116   | 1000   | 205915                                                        | 7132   |
| spells receiving treatment from non govt sources: |                                                                                              |                                                                                                          |                                                                       |              |                                          |        |       |        |                                                               |        |
| estd no. (00)                                     | X                                                                                            | 43144                                                                                                    | 84548                                                                 | 16328        | 10616                                    | 27285  | 23952 | 205874 | X                                                             | X      |
| sample                                            | X                                                                                            | 1293                                                                                                     | 3022                                                                  | 558          | 411                                      | 989    | 857   | 7130   | X                                                             | X      |

Table (42): Number of spells of ailments receiving treatment from non- government sources per 1000 of treated spells during last 15 days and their distribution by reason for not taking treatment from govt. sources for each mpce class

| mpce class                                        | no. of spells of ailment receiving treatment from non- govt. sources per 1000 treated spells | Rural                                                                                                    |                                                                       |              |                                          |        |       |        | Females                                                       |        |
|---------------------------------------------------|----------------------------------------------------------------------------------------------|----------------------------------------------------------------------------------------------------------|-----------------------------------------------------------------------|--------------|------------------------------------------|--------|-------|--------|---------------------------------------------------------------|--------|
|                                                   |                                                                                              | spells of ailment receiving treatment from non- govt. sources by reason for not using government sources |                                                                       |              |                                          |        |       |        | spells of ailment receiving treatment from non- govt. sources |        |
|                                                   |                                                                                              | gover- nment doctor/ facili- ties too far                                                                | not satisfied with medical treatment by government doctor/ facilities | long waiting | required specific services not available | others | n.r.  | total  | estd. no. (00)                                                | sample |
| (1)                                               | (2)                                                                                          | (3)                                                                                                      | (4)                                                                   | (5)          | (6)                                      | (7)    | (8)   | (9)    | (10)                                                          | (11)   |
| 0 – 225                                           | 689                                                                                          | 211                                                                                                      | 273                                                                   | 8            | 50                                       | 205    | 252   | 1000   | 7452                                                          | 221    |
| 225 – 255                                         | 688                                                                                          | 330                                                                                                      | 300                                                                   | 37           | 38                                       | 162    | 133   | 1000   | 4813                                                          | 164    |
| 255 – 300                                         | 723                                                                                          | 281                                                                                                      | 322                                                                   | 37           | 37                                       | 128    | 195   | 1000   | 13639                                                         | 422    |
| 300 – 340                                         | 752                                                                                          | 224                                                                                                      | 386                                                                   | 81           | 46                                       | 120    | 142   | 1000   | 12473                                                         | 419    |
| 340 – 380                                         | 797                                                                                          | 258                                                                                                      | 334                                                                   | 100          | 67                                       | 116    | 126   | 1000   | 18158                                                         | 605    |
| 380 – 420                                         | 784                                                                                          | 198                                                                                                      | 346                                                                   | 64           | 71                                       | 174    | 146   | 1000   | 19555                                                         | 644    |
| 420 – 470                                         | 791                                                                                          | 302                                                                                                      | 349                                                                   | 68           | 34                                       | 111    | 136   | 1000   | 23137                                                         | 756    |
| 470 – 525                                         | 773                                                                                          | 203                                                                                                      | 422                                                                   | 69           | 47                                       | 149    | 109   | 1000   | 24278                                                         | 816    |
| 525 – 615                                         | 763                                                                                          | 198                                                                                                      | 433                                                                   | 95           | 34                                       | 121    | 118   | 1000   | 22336                                                         | 817    |
| 615 – 775                                         | 775                                                                                          | 152                                                                                                      | 495                                                                   | 112          | 39                                       | 115    | 88    | 1000   | 28268                                                         | 1085   |
| 775 – 950                                         | 784                                                                                          | 183                                                                                                      | 463                                                                   | 113          | 54                                       | 124    | 64    | 1000   | 18147                                                         | 618    |
| 950 +                                             | 804                                                                                          | 134                                                                                                      | 465                                                                   | 134          | 102                                      | 104    | 62    | 1000   | 24230                                                         | 859    |
| all                                               | 771                                                                                          | 210                                                                                                      | 403                                                                   | 86           | 53                                       | 129    | 119   | 1000   | 216486                                                        | 7426   |
| spells receiving treatment from non govt sources: |                                                                                              |                                                                                                          |                                                                       |              |                                          |        |       |        |                                                               |        |
| estd no. (00)                                     | X                                                                                            | 45555                                                                                                    | 87172                                                                 | 18654        | 11488                                    | 27933  | 25684 | 216486 | X                                                             | X      |
| sample                                            | X                                                                                            | 1359                                                                                                     | 3025                                                                  | 597          | 424                                      | 1051   | 970   | 7426   | X                                                             | X      |



Table (42): Number of spells of ailments receiving treatment from non- government sources per 1000 of treated spells during last 15 days and their distribution by reason for not taking treatment from govt. sources for each mpce class

| mpce class                                        | no. of spells of ailment receiving treatment from non- govt. sources per 1000 treated spells | Rural                                                                                                    |                                                                       |              |                                          |        |       |        | Persons                                                       |        |
|---------------------------------------------------|----------------------------------------------------------------------------------------------|----------------------------------------------------------------------------------------------------------|-----------------------------------------------------------------------|--------------|------------------------------------------|--------|-------|--------|---------------------------------------------------------------|--------|
|                                                   |                                                                                              | spells of ailment receiving treatment from non- govt. sources by reason for not using government sources |                                                                       |              |                                          |        |       |        | spells of ailment receiving treatment from non- govt. sources |        |
|                                                   |                                                                                              | gover- nment doctor/ facili- ties too far                                                                | not satisfied with medical treatment by government doctor/ facilities | long waiting | required specific services not available | others | n.r.  | total  | estd. no. (00)                                                | sample |
| (1)                                               | (2)                                                                                          | (3)                                                                                                      | (4)                                                                   | (5)          | (6)                                      | (7)    | (8)   | (9)    | (10)                                                          | (11)   |
| 0 – 225                                           | 703                                                                                          | 228                                                                                                      | 266                                                                   | 25           | 43                                       | 205    | 232   | 1000   | 14931                                                         | 438    |
| 225 – 255                                         | 738                                                                                          | 276                                                                                                      | 331                                                                   | 48           | 36                                       | 149    | 160   | 1000   | 10768                                                         | 332    |
| 255 – 300                                         | 743                                                                                          | 280                                                                                                      | 288                                                                   | 40           | 44                                       | 169    | 178   | 1000   | 27609                                                         | 849    |
| 300 – 340                                         | 738                                                                                          | 239                                                                                                      | 370                                                                   | 54           | 42                                       | 140    | 156   | 1000   | 24515                                                         | 803    |
| 340 – 380                                         | 786                                                                                          | 248                                                                                                      | 371                                                                   | 99           | 52                                       | 110    | 120   | 1000   | 35316                                                         | 1149   |
| 380 – 420                                         | 781                                                                                          | 228                                                                                                      | 362                                                                   | 64           | 66                                       | 145    | 135   | 1000   | 38245                                                         | 1284   |
| 420 – 470                                         | 779                                                                                          | 279                                                                                                      | 374                                                                   | 62           | 34                                       | 116    | 135   | 1000   | 43466                                                         | 1463   |
| 470 – 525                                         | 798                                                                                          | 189                                                                                                      | 426                                                                   | 83           | 43                                       | 140    | 118   | 1000   | 47693                                                         | 1629   |
| 525 – 615                                         | 773                                                                                          | 205                                                                                                      | 435                                                                   | 92           | 45                                       | 121    | 102   | 1000   | 45386                                                         | 1664   |
| 615 – 775                                         | 786                                                                                          | 168                                                                                                      | 484                                                                   | 97           | 46                                       | 117    | 87    | 1000   | 57001                                                         | 2135   |
| 775 – 950                                         | 770                                                                                          | 155                                                                                                      | 457                                                                   | 118          | 68                                       | 129    | 73    | 1000   | 33030                                                         | 1157   |
| 950 +                                             | 821                                                                                          | 137                                                                                                      | 477                                                                   | 123          | 91                                       | 109    | 63    | 1000   | 44439                                                         | 1655   |
| all                                               | 777                                                                                          | 210                                                                                                      | 407                                                                   | 83           | 52                                       | 131    | 118   | 1000   | 422401                                                        | 14558  |
| spells receiving treatment from non govt sources: |                                                                                              |                                                                                                          |                                                                       |              |                                          |        |       |        |                                                               |        |
| estd no. (00)                                     | X                                                                                            | 88699                                                                                                    | 171720                                                                | 34982        | 22104                                    | 55219  | 49636 | 422359 | X                                                             | X      |
| sample                                            | X                                                                                            | 2652                                                                                                     | 6047                                                                  | 1155         | 835                                      | 2040   | 1827  | 14556  | X                                                             | X      |

Table (42): Number of spells of ailments receiving treatment from non- government sources per 1000 of treated spells during last 15 days and their distribution by reason for not taking treatment from govt. sources for each mpce class

| mpce class                                        | no. of spells of ailment receiving treatment from non- govt. sources per 1000 treated spells | Urban                                                                                                    |                                                                       |              |                                          |        |      |       | Males                                                         |        |
|---------------------------------------------------|----------------------------------------------------------------------------------------------|----------------------------------------------------------------------------------------------------------|-----------------------------------------------------------------------|--------------|------------------------------------------|--------|------|-------|---------------------------------------------------------------|--------|
|                                                   |                                                                                              | spells of ailment receiving treatment from non- govt. sources by reason for not using government sources |                                                                       |              |                                          |        |      |       | spells of ailment receiving treatment from non- govt. sources |        |
|                                                   |                                                                                              | gover- nment doctor/ facili- ties too far                                                                | not satisfied with medical treatment by government doctor/ facilities | long waiting | required specific services not available | others | n.r. | total | estd. no. (00)                                                | sample |
| (1)                                               | (2)                                                                                          | (3)                                                                                                      | (4)                                                                   | (5)          | (6)                                      | (7)    | (8)  | (9)   | (10)                                                          | (11)   |
| 0 – 300                                           | 741                                                                                          | 163                                                                                                      | 432                                                                   | 138          | 20                                       | 138    | 110  | 1000  | 1943                                                          | 84     |
| 300 – 350                                         | 788                                                                                          | 49                                                                                                       | 704                                                                   | 57           | 21                                       | 92     | 77   | 1000  | 2191                                                          | 79     |
| 350 – 425                                         | 769                                                                                          | 136                                                                                                      | 479                                                                   | 207          | 39                                       | 76     | 64   | 1000  | 4436                                                          | 212    |
| 425 – 500                                         | 765                                                                                          | 102                                                                                                      | 440                                                                   | 176          | 41                                       | 116    | 124  | 1000  | 8231                                                          | 440    |
| 500 – 575                                         | 754                                                                                          | 186                                                                                                      | 385                                                                   | 128          | 52                                       | 106    | 142  | 1000  | 4135                                                          | 230    |
| 575 – 665                                         | 705                                                                                          | 144                                                                                                      | 394                                                                   | 183          | 37                                       | 181    | 61   | 1000  | 5192                                                          | 312    |
| 665 – 775                                         | 832                                                                                          | 95                                                                                                       | 453                                                                   | 155          | 58                                       | 169    | 70   | 1000  | 10682                                                         | 525    |
| 775 – 915                                         | 764                                                                                          | 144                                                                                                      | 467                                                                   | 140          | 38                                       | 144    | 67   | 1000  | 8509                                                          | 493    |
| 915 – 1120                                        | 789                                                                                          | 174                                                                                                      | 449                                                                   | 178          | 12                                       | 115    | 71   | 1000  | 11738                                                         | 635    |
| 1120 – 1500                                       | 870                                                                                          | 100                                                                                                      | 519                                                                   | 146          | 32                                       | 138    | 65   | 1000  | 16601                                                         | 780    |
| 1500 – 1925                                       | 808                                                                                          | 67                                                                                                       | 446                                                                   | 228          | 19                                       | 210    | 28   | 1000  | 4259                                                          | 281    |
| 1925 +                                            | 897                                                                                          | 118                                                                                                      | 390                                                                   | 133          | 46                                       | 280    | 33   | 1000  | 12354                                                         | 569    |
| all                                               | 808                                                                                          | 123                                                                                                      | 456                                                                   | 158          | 36                                       | 157    | 70   | 1000  | 90271                                                         | 4640   |
| spells receiving treatment from non govt sources: |                                                                                              |                                                                                                          |                                                                       |              |                                          |        |      |       |                                                               |        |
| estd no. (00)                                     | X                                                                                            | 11083                                                                                                    | 41188                                                                 | 14220        | 3251                                     | 14170  | 6360 | 90271 | X                                                             | X      |
| sample                                            | X                                                                                            | 422                                                                                                      | 2170                                                                  | 752          | 215                                      | 713    | 368  | 4640  | X                                                             | X      |

Table (42): Number of spells of ailments receiving treatment from non- government sources per 1000 of treated spells during last 15 days and their distribution by reason for not taking treatment from govt. sources for each mpce class

| mpce class                                        | no. of spells of ailment receiving treatment from non- govt. sources per 1000 treated spells | Urban                                                                                                    |                                                                       |              |                                          |        |      |       | Females                                                       |        |
|---------------------------------------------------|----------------------------------------------------------------------------------------------|----------------------------------------------------------------------------------------------------------|-----------------------------------------------------------------------|--------------|------------------------------------------|--------|------|-------|---------------------------------------------------------------|--------|
|                                                   |                                                                                              | spells of ailment receiving treatment from non- govt. sources by reason for not using government sources |                                                                       |              |                                          |        |      |       | spells of ailment receiving treatment from non- govt. sources |        |
|                                                   |                                                                                              | gover- nment doctor/ facili- ties too far                                                                | not satisfied with medical treatment by government doctor/ facilities | long waiting | required specific services not available | others | n.r. | total | estd. no. (00)                                                | sample |
| (1)                                               | (2)                                                                                          | (3)                                                                                                      | (4)                                                                   | (5)          | (6)                                      | (7)    | (8)  | (9)   | (10)                                                          | (11)   |
| 0 – 300                                           | 740                                                                                          | 76                                                                                                       | 211                                                                   | 177          | 59                                       | 325    | 152  | 1000  | 1489                                                          | 69     |
| 300 – 350                                         | 784                                                                                          | 42                                                                                                       | 537                                                                   | 67           | 25                                       | 202    | 127  | 1000  | 2106                                                          | 87     |
| 350 – 425                                         | 722                                                                                          | 100                                                                                                      | 403                                                                   | 217          | 25                                       | 106    | 150  | 1000  | 4312                                                          | 234    |
| 425 – 500                                         | 729                                                                                          | 174                                                                                                      | 440                                                                   | 152          | 65                                       | 95     | 74   | 1000  | 8501                                                          | 470    |
| 500 – 575                                         | 785                                                                                          | 167                                                                                                      | 396                                                                   | 108          | 31                                       | 205    | 93   | 1000  | 4490                                                          | 254    |
| 575 – 665                                         | 766                                                                                          | 225                                                                                                      | 371                                                                   | 207          | 34                                       | 118    | 44   | 1000  | 7383                                                          | 378    |
| 665 – 775                                         | 825                                                                                          | 118                                                                                                      | 433                                                                   | 124          | 37                                       | 132    | 156  | 1000  | 12336                                                         | 618    |
| 775 – 915                                         | 805                                                                                          | 112                                                                                                      | 511                                                                   | 161          | 39                                       | 134    | 42   | 1000  | 9994                                                          | 565    |
| 915 – 1120                                        | 830                                                                                          | 157                                                                                                      | 456                                                                   | 179          | 22                                       | 146    | 40   | 1000  | 13179                                                         | 724    |
| 1120 – 1500                                       | 817                                                                                          | 121                                                                                                      | 496                                                                   | 183          | 44                                       | 113    | 44   | 1000  | 15157                                                         | 884    |
| 1500 – 1925                                       | 847                                                                                          | 116                                                                                                      | 448                                                                   | 185          | 41                                       | 181    | 29   | 1000  | 5110                                                          | 330    |
| 1925 +                                            | 885                                                                                          | 199                                                                                                      | 383                                                                   | 165          | 35                                       | 170    | 48   | 1000  | 14678                                                         | 675    |
| all                                               | 809                                                                                          | 147                                                                                                      | 439                                                                   | 165          | 38                                       | 142    | 70   | 1000  | 98737                                                         | 5288   |
| spells receiving treatment from non govt sources: |                                                                                              |                                                                                                          |                                                                       |              |                                          |        |      |       |                                                               |        |
| estd no. (00)                                     | X                                                                                            | 14523                                                                                                    | 43330                                                                 | 16293        | 3714                                     | 13973  | 6883 | 98715 | X                                                             | X      |
| sample                                            | X                                                                                            | 583                                                                                                      | 2436                                                                  | 863          | 234                                      | 805    | 366  | 5287  | X                                                             | X      |

Table (42): Number of spells of ailments receiving treatment from non- government sources per 1000 of treated spells during last 15 days and their distribution by reason for not taking treatment from govt. sources for each mpce class

| mpce class                                        | no. of spells of ailment receiving treatment from non- govt. sources per 1000 treated spells | Urban                                                                                                    |                                                                       |              |                                          |        |       |        | Persons                                                       |        |
|---------------------------------------------------|----------------------------------------------------------------------------------------------|----------------------------------------------------------------------------------------------------------|-----------------------------------------------------------------------|--------------|------------------------------------------|--------|-------|--------|---------------------------------------------------------------|--------|
|                                                   |                                                                                              | spells of ailment receiving treatment from non- govt. sources by reason for not using government sources |                                                                       |              |                                          |        |       |        | spells of ailment receiving treatment from non- govt. sources |        |
|                                                   |                                                                                              | gover- nment doctor/ facilities too far                                                                  | not satisfied with medical treatment by government doctor/ facilities | long waiting | required specific services not available | others | n.r.  | total  | estd. no. (00)                                                | sample |
| (1)                                               | (2)                                                                                          | (3)                                                                                                      | (4)                                                                   | (5)          | (6)                                      | (7)    | (8)   | (9)    | (10)                                                          | (11)   |
| 0 – 300                                           | 741                                                                                          | 125                                                                                                      | 336                                                                   | 155          | 37                                       | 219    | 128   | 1000   | 3431                                                          | 153    |
| 300 – 350                                         | 786                                                                                          | 46                                                                                                       | 622                                                                   | 62           | 23                                       | 146    | 101   | 1000   | 4298                                                          | 166    |
| 350 – 425                                         | 745                                                                                          | 118                                                                                                      | 441                                                                   | 212          | 32                                       | 91     | 106   | 1000   | 8748                                                          | 446    |
| 425 – 500                                         | 746                                                                                          | 139                                                                                                      | 440                                                                   | 164          | 53                                       | 105    | 99    | 1000   | 16732                                                         | 910    |
| 500 – 575                                         | 770                                                                                          | 176                                                                                                      | 391                                                                   | 118          | 41                                       | 158    | 117   | 1000   | 8625                                                          | 484    |
| 575 – 665                                         | 740                                                                                          | 192                                                                                                      | 381                                                                   | 197          | 35                                       | 144    | 51    | 1000   | 12575                                                         | 690    |
| 665 – 775                                         | 828                                                                                          | 107                                                                                                      | 442                                                                   | 139          | 47                                       | 149    | 116   | 1000   | 23018                                                         | 1143   |
| 775 – 915                                         | 785                                                                                          | 127                                                                                                      | 491                                                                   | 152          | 38                                       | 139    | 54    | 1000   | 18504                                                         | 1058   |
| 915 – 1120                                        | 810                                                                                          | 165                                                                                                      | 453                                                                   | 179          | 17                                       | 132    | 55    | 1000   | 24917                                                         | 1359   |
| 1120 – 1500                                       | 844                                                                                          | 110                                                                                                      | 508                                                                   | 163          | 37                                       | 126    | 55    | 1000   | 31758                                                         | 1664   |
| 1500 – 1925                                       | 829                                                                                          | 94                                                                                                       | 447                                                                   | 205          | 31                                       | 194    | 29    | 1000   | 9369                                                          | 611    |
| 1925 +                                            | 891                                                                                          | 162                                                                                                      | 386                                                                   | 150          | 40                                       | 220    | 41    | 1000   | 27032                                                         | 1244   |
| all                                               | 808                                                                                          | 135                                                                                                      | 447                                                                   | 161          | 37                                       | 149    | 70    | 1000   | 189008                                                        | 9928   |
| spells receiving treatment from non govt sources: |                                                                                              |                                                                                                          |                                                                       |              |                                          |        |       |        |                                                               |        |
| estd no. (00)                                     | X                                                                                            | 25606                                                                                                    | 84517                                                                 | 30512        | 6965                                     | 28143  | 13243 | 188986 | X                                                             | X      |
| sample                                            | X                                                                                            | 1005                                                                                                     | 4606                                                                  | 1615         | 449                                      | 1518   | 734   | 9927   | X                                                             | X      |

Table (42): Number of spells of ailments receiving treatment from non- government sources per 1000 of treated spells during last 15 days and their distribution by reason for not taking treatment from govt. sources for each mpce class

| mpce class                                        | no. of spells of ailment receiving treatment from non- govt. sources per 1000 treated spells | Rural + Urban                                                                                            |                                                                       |              |                                          |        |       |        | Males                                                         |        |
|---------------------------------------------------|----------------------------------------------------------------------------------------------|----------------------------------------------------------------------------------------------------------|-----------------------------------------------------------------------|--------------|------------------------------------------|--------|-------|--------|---------------------------------------------------------------|--------|
|                                                   |                                                                                              | spells of ailment receiving treatment from non- govt. sources by reason for not using government sources |                                                                       |              |                                          |        |       |        | spells of ailment receiving treatment from non- govt. sources |        |
|                                                   |                                                                                              | gover- nment doctor/ facili- ties too far                                                                | not satisfied with medical treatment by government doctor/ facilities | long waiting | required specific services not available | others | n.r.  | total  | estd. no. (00)                                                | sample |
| (1)                                               | (2)                                                                                          | (3)                                                                                                      | (4)                                                                   | (5)          | (6)                                      | (7)    | (8)   | (9)    | (10)                                                          | (11)   |
| 0 – 235                                           | 723                                                                                          | 228                                                                                                      | 295                                                                   | 61           | 32                                       | 191    | 191   | 1000   | 9421                                                          | 301    |
| 235 – 265                                         | 785                                                                                          | 183                                                                                                      | 450                                                                   | 57           | 31                                       | 126    | 153   | 1000   | 8146                                                          | 247    |
| 265 – 320                                         | 765                                                                                          | 244                                                                                                      | 309                                                                   | 83           | 48                                       | 177    | 138   | 1000   | 18407                                                         | 639    |
| 320 – 365                                         | 740                                                                                          | 192                                                                                                      | 388                                                                   | 87           | 39                                       | 142    | 151   | 1000   | 20273                                                         | 824    |
| 365 – 410                                         | 771                                                                                          | 227                                                                                                      | 405                                                                   | 104          | 40                                       | 105    | 119   | 1000   | 21293                                                         | 774    |
| 410 – 460                                         | 760                                                                                          | 234                                                                                                      | 381                                                                   | 91           | 56                                       | 130    | 109   | 1000   | 23883                                                         | 952    |
| 460 – 520                                         | 787                                                                                          | 199                                                                                                      | 420                                                                   | 90           | 42                                       | 139    | 111   | 1000   | 31012                                                         | 1232   |
| 520 – 605                                         | 808                                                                                          | 166                                                                                                      | 440                                                                   | 109          | 39                                       | 134    | 112   | 1000   | 31925                                                         | 1306   |
| 605 – 730                                         | 786                                                                                          | 199                                                                                                      | 442                                                                   | 119          | 41                                       | 119    | 82    | 1000   | 34788                                                         | 1482   |
| 730 – 980                                         | 823                                                                                          | 154                                                                                                      | 490                                                                   | 105          | 45                                       | 127    | 79    | 1000   | 45334                                                         | 1830   |
| 980 – 1285                                        | 766                                                                                          | 110                                                                                                      | 449                                                                   | 147          | 70                                       | 153    | 72    | 1000   | 19141                                                         | 820    |
| 1285 +                                            | 863                                                                                          | 132                                                                                                      | 454                                                                   | 119          | 65                                       | 178    | 53    | 1000   | 32563                                                         | 1365   |
| all                                               | 790                                                                                          | 183                                                                                                      | 425                                                                   | 103          | 47                                       | 140    | 102   | 1000   | 296186                                                        | 11772  |
| spells receiving treatment from non govt sources: |                                                                                              |                                                                                                          |                                                                       |              |                                          |        |       |        |                                                               |        |
| estd no. (00)                                     | X                                                                                            | 54227                                                                                                    | 125736                                                                | 30547        | 13867                                    | 41456  | 30312 | 296145 | X                                                             | X      |
| sample                                            | X                                                                                            | 1715                                                                                                     | 5192                                                                  | 1310         | 626                                      | 1702   | 1225  | 11770  | X                                                             | X      |

Table (42): Number of spells of ailments receiving treatment from non- government sources per 1000 of treated spells during last 15 days and their distribution by reason for not taking treatment from govt. sources for each mpce class

| mpce class                                        | no. of spells of ailment receiving treatment from non- govt. sources per 1000 treated spells | Rural + Urban                                                                                            |                                                                       |              |                                          |        |       |        | Females                                                       |        |
|---------------------------------------------------|----------------------------------------------------------------------------------------------|----------------------------------------------------------------------------------------------------------|-----------------------------------------------------------------------|--------------|------------------------------------------|--------|-------|--------|---------------------------------------------------------------|--------|
|                                                   |                                                                                              | spells of ailment receiving treatment from non- govt. sources by reason for not using government sources |                                                                       |              |                                          |        |       |        | spells of ailment receiving treatment from non- govt. sources |        |
|                                                   |                                                                                              | gover- nment doctor/ facili- ties too far                                                                | not satisfied with medical treatment by government doctor/ facilities | long waiting | required specific services not available | others | n.r.  | total  | estd. no. (00)                                                | sample |
| (1)                                               | (2)                                                                                          | (3)                                                                                                      | (4)                                                                   | (5)          | (6)                                      | (7)    | (8)   | (9)    | (10)                                                          | (11)   |
| 0 – 235                                           | 697                                                                                          | 189                                                                                                      | 263                                                                   | 37           | 51                                       | 225    | 235   | 1000   | 8941                                                          | 290    |
| 235 – 265                                         | 715                                                                                          | 242                                                                                                      | 372                                                                   | 46           | 34                                       | 174    | 132   | 1000   | 6919                                                          | 251    |
| 265 – 320                                         | 723                                                                                          | 238                                                                                                      | 341                                                                   | 81           | 34                                       | 123    | 184   | 1000   | 17951                                                         | 656    |
| 320 – 365                                         | 742                                                                                          | 204                                                                                                      | 408                                                                   | 110          | 54                                       | 110    | 115   | 1000   | 20974                                                         | 889    |
| 365 – 410                                         | 795                                                                                          | 240                                                                                                      | 346                                                                   | 102          | 60                                       | 133    | 119   | 1000   | 22648                                                         | 859    |
| 410 – 460                                         | 779                                                                                          | 206                                                                                                      | 353                                                                   | 103          | 61                                       | 158    | 118   | 1000   | 26938                                                         | 1022   |
| 460 – 520                                         | 802                                                                                          | 238                                                                                                      | 379                                                                   | 87           | 35                                       | 118    | 143   | 1000   | 35473                                                         | 1374   |
| 520 – 605                                         | 782                                                                                          | 177                                                                                                      | 448                                                                   | 96           | 44                                       | 145    | 90    | 1000   | 34272                                                         | 1381   |
| 605 – 730                                         | 786                                                                                          | 183                                                                                                      | 441                                                                   | 127          | 30                                       | 130    | 89    | 1000   | 35515                                                         | 1541   |
| 730 – 980                                         | 789                                                                                          | 141                                                                                                      | 496                                                                   | 136          | 41                                       | 114    | 72    | 1000   | 43425                                                         | 1969   |
| 980 – 1285                                        | 797                                                                                          | 168                                                                                                      | 459                                                                   | 129          | 51                                       | 136    | 56    | 1000   | 23258                                                         | 948    |
| 1285 +                                            | 833                                                                                          | 158                                                                                                      | 434                                                                   | 146          | 77                                       | 129    | 56    | 1000   | 38908                                                         | 1534   |
| all                                               | 782                                                                                          | 191                                                                                                      | 414                                                                   | 111          | 48                                       | 133    | 103   | 1000   | 315222                                                        | 12714  |
| spells receiving treatment from non govt sources: |                                                                                              |                                                                                                          |                                                                       |              |                                          |        |       |        |                                                               |        |
| estd no. (00)                                     | X                                                                                            | 60078                                                                                                    | 130501                                                                | 34947        | 15202                                    | 41906  | 32566 | 315200 | X                                                             | X      |
| sample                                            | X                                                                                            | 1942                                                                                                     | 5461                                                                  | 1460         | 658                                      | 1856   | 1336  | 12713  | X                                                             | X      |

Table (42): Number of spells of ailments receiving treatment from non- government sources per 1000 of treated spells during last 15 days and their distribution by reason for not taking treatment from govt. sources for each mpce class

| All-India<br>mpce<br>class                        | no. of<br>spells of<br>ailment<br>receiving<br>treatment<br>from non-<br>govt.<br>sources per<br>1000<br>treated<br>spells | Rural + Urban                                                                                              |                                                                                            |                 |                                                      |        |       |        | Persons                                                               |        |
|---------------------------------------------------|----------------------------------------------------------------------------------------------------------------------------|------------------------------------------------------------------------------------------------------------|--------------------------------------------------------------------------------------------|-----------------|------------------------------------------------------|--------|-------|--------|-----------------------------------------------------------------------|--------|
|                                                   |                                                                                                                            | spells of ailment receiving treatment from non-govt. sources by reason<br>for not using government sources |                                                                                            |                 |                                                      |        |       |        | spells of ailment<br>receiving<br>treatment from<br>non-govt. sources |        |
|                                                   |                                                                                                                            | gover-<br>nment<br>doctor/<br>facili-<br>ties too<br>far                                                   | not satisfied<br>with<br>medical<br>treatment<br>by<br>government<br>doctor/<br>facilities | long<br>waiting | required<br>specific<br>services<br>not<br>available | others | n.r.  | total  | estd. no.<br>(00)                                                     | sample |
| (1)                                               | (2)                                                                                                                        | (3)                                                                                                        | (4)                                                                                        | (5)             | (6)                                                  | (7)    | (8)   | (9)    | (10)                                                                  | (11)   |
| 0 – 235                                           | 710                                                                                                                        | 209                                                                                                        | 279                                                                                        | 49              | 42                                                   | 208    | 213   | 1000   | 18362                                                                 | 591    |
| 235 – 265                                         | 751                                                                                                                        | 210                                                                                                        | 414                                                                                        | 52              | 32                                                   | 148    | 143   | 1000   | 15066                                                                 | 498    |
| 265 – 320                                         | 744                                                                                                                        | 241                                                                                                        | 325                                                                                        | 82              | 41                                                   | 150    | 161   | 1000   | 36357                                                                 | 1295   |
| 320 – 365                                         | 741                                                                                                                        | 198                                                                                                        | 399                                                                                        | 98              | 47                                                   | 126    | 132   | 1000   | 41247                                                                 | 1713   |
| 365 – 410                                         | 783                                                                                                                        | 234                                                                                                        | 375                                                                                        | 103             | 50                                                   | 120    | 119   | 1000   | 43942                                                                 | 1633   |
| 410 – 460                                         | 770                                                                                                                        | 219                                                                                                        | 366                                                                                        | 97              | 59                                                   | 145    | 114   | 1000   | 50821                                                                 | 1974   |
| 460 – 520                                         | 795                                                                                                                        | 220                                                                                                        | 398                                                                                        | 88              | 38                                                   | 128    | 128   | 1000   | 66485                                                                 | 2606   |
| 520 – 605                                         | 794                                                                                                                        | 172                                                                                                        | 444                                                                                        | 102             | 42                                                   | 139    | 100   | 1000   | 66197                                                                 | 2687   |
| 605 – 730                                         | 786                                                                                                                        | 191                                                                                                        | 441                                                                                        | 123             | 35                                                   | 125    | 85    | 1000   | 70302                                                                 | 3023   |
| 730 – 980                                         | 806                                                                                                                        | 148                                                                                                        | 493                                                                                        | 120             | 43                                                   | 120    | 76    | 1000   | 88759                                                                 | 3799   |
| 980 – 1285                                        | 782                                                                                                                        | 142                                                                                                        | 455                                                                                        | 137             | 59                                                   | 144    | 63    | 1000   | 42399                                                                 | 1768   |
| 1285 +                                            | 846                                                                                                                        | 147                                                                                                        | 443                                                                                        | 133             | 71                                                   | 151    | 55    | 1000   | 71472                                                                 | 2899   |
| all                                               | 786                                                                                                                        | 187                                                                                                        | 419                                                                                        | 107             | 48                                                   | 136    | 103   | 1000   | 611408                                                                | 24486  |
| spells receiving treatment from non govt sources: |                                                                                                                            |                                                                                                            |                                                                                            |                 |                                                      |        |       |        |                                                                       |        |
| estd no. (00)                                     | X                                                                                                                          | 114305                                                                                                     | 256237                                                                                     | 65494           | 29069                                                | 83362  | 62879 | 611345 | X                                                                     | X      |
| sample                                            | X                                                                                                                          | 3657                                                                                                       | 10653                                                                                      | 2770            | 1284                                                 | 3558   | 2561  | 24483  | X                                                                     | X      |

Table (43): Number per 1000 untreated spells of ailment reporting measures taken for recovery/relief (other than medical treatment), per 1000 distribution of such spells of ailments by measure taken for recovery/relief and average expenditure incurred for such measures for recovery/relief separately for each mpce class

| All-India<br>mpce<br>class | no. per 1000 of<br>spells of<br>ailment<br>reporting<br>recovery /relief<br>measure other<br>than medical<br>treatment | Rural                                                          |                  |        |      |       | av. exp.<br>incurred<br>on<br>recovery<br>/ relief<br>measure<br>other<br>than<br>medical<br>con-<br>sul-<br>tation<br>(Rs. 0.0) | untreated spells of<br>ailment during the<br>last 15 days for<br>which some relief<br>measures taken |        | Males<br>untreated spells<br>of ailment<br>during the last 15<br>days |        |
|----------------------------|------------------------------------------------------------------------------------------------------------------------|----------------------------------------------------------------|------------------|--------|------|-------|----------------------------------------------------------------------------------------------------------------------------------|------------------------------------------------------------------------------------------------------|--------|-----------------------------------------------------------------------|--------|
|                            |                                                                                                                        | measure taken for recovery/relief other than medical<br>advice |                  |        |      |       |                                                                                                                                  | estd. no.<br>(00)                                                                                    | sample | estd.<br>no.<br>(00)                                                  | sample |
|                            |                                                                                                                        | whom consulted                                                 |                  |        |      |       |                                                                                                                                  |                                                                                                      |        |                                                                       |        |
|                            |                                                                                                                        | self/other<br>household<br>member/<br>friend                   | medicine<br>shop | others | n.r. | total |                                                                                                                                  |                                                                                                      |        |                                                                       |        |
| (1)                        | (2)                                                                                                                    | (3)                                                            | (4)              | (5)    | (6)  | (7)   | (8)                                                                                                                              | (9)                                                                                                  | (10)   | (11)                                                                  | (12)   |
| 0 – 225                    | 545                                                                                                                    | 156                                                            | 367              | 477    | 0    | 1000  | 39.3                                                                                                                             | 2123                                                                                                 | 47     | 3897                                                                  | 108    |
| 225 – 255                  | 444                                                                                                                    | 114                                                            | 404              | 482    | 0    | 1000  | 13.7                                                                                                                             | 822                                                                                                  | 29     | 1852                                                                  | 73     |
| 255 – 300                  | 525                                                                                                                    | 148                                                            | 375              | 476    | 0    | 1000  | 21.7                                                                                                                             | 2593                                                                                                 | 79     | 4937                                                                  | 171    |
| 300 – 340                  | 602                                                                                                                    | 308                                                            | 389              | 303    | 0    | 1000  | 31.3                                                                                                                             | 3158                                                                                                 | 73     | 5244                                                                  | 155    |
| 340 – 380                  | 421                                                                                                                    | 196                                                            | 387              | 417    | 0    | 1000  | 20.8                                                                                                                             | 2226                                                                                                 | 69     | 5294                                                                  | 177    |
| 380 – 420                  | 518                                                                                                                    | 194                                                            | 449              | 357    | 1    | 1000  | 57.9                                                                                                                             | 3234                                                                                                 | 86     | 6238                                                                  | 198    |
| 420 – 470                  | 495                                                                                                                    | 217                                                            | 411              | 372    | 0    | 1000  | 29.1                                                                                                                             | 2760                                                                                                 | 89     | 5575                                                                  | 208    |
| 470 – 525                  | 650                                                                                                                    | 307                                                            | 206              | 484    | 3    | 1000  | 44.9                                                                                                                             | 4703                                                                                                 | 127    | 7239                                                                  | 247    |
| 525 – 615                  | 553                                                                                                                    | 179                                                            | 457              | 365    | 0    | 1000  | 31.3                                                                                                                             | 2897                                                                                                 | 113    | 5237                                                                  | 241    |
| 615 – 775                  | 546                                                                                                                    | 337                                                            | 406              | 257    | 0    | 1000  | 20                                                                                                                               | 2643                                                                                                 | 83     | 4845                                                                  | 194    |
| 775 – 950                  | 452                                                                                                                    | 297                                                            | 228              | 475    | 0    | 1000  | 36.3                                                                                                                             | 1297                                                                                                 | 39     | 2873                                                                  | 100    |
| 950 +                      | 496                                                                                                                    | 591                                                            | 331              | 78     | 0    | 1000  | 161                                                                                                                              | 1492                                                                                                 | 46     | 3009                                                                  | 115    |
| all                        | 533                                                                                                                    | 252                                                            | 364              | 383    | 1    | 1000  | 40.2                                                                                                                             | 29950                                                                                                | 880    | 56241                                                                 | 1987   |



Table (43): Number per 1000 untreated spells of ailment reporting measures taken for recovery/relief (other than medical treatment), per 1000 distribution of such spells of ailments by measure taken for recovery/relief and average expenditure incurred for such measures for recovery/relief separately for each mpce class

| All-India<br>mpce<br>class | no. per 1000 of<br>spells of<br>ailment<br>reporting<br>recovery /relief<br>measure other<br>than medical<br>treatment | Rural                                                          |                  |        |      |       | av. exp.<br>incurred<br>on<br>recovery<br>/ relief<br>measure<br>other<br>than<br>medical<br>consul-<br>tation<br>(Rs. 0.0) | untreated spells of<br>ailment during the<br>last 15 days for<br>which some relief<br>measures taken |        | Females<br>untreated spells<br>of ailment<br>during the last 15<br>days |        |
|----------------------------|------------------------------------------------------------------------------------------------------------------------|----------------------------------------------------------------|------------------|--------|------|-------|-----------------------------------------------------------------------------------------------------------------------------|------------------------------------------------------------------------------------------------------|--------|-------------------------------------------------------------------------|--------|
|                            |                                                                                                                        | measure taken for recovery/relief other than medical<br>advice |                  |        |      |       |                                                                                                                             | estd. no.<br>(00)                                                                                    | sample | estd.<br>no.<br>(00)                                                    | sample |
|                            |                                                                                                                        | whom consulted                                                 |                  |        |      |       |                                                                                                                             |                                                                                                      |        |                                                                         |        |
|                            |                                                                                                                        | self/other<br>household<br>member/<br>friend                   | medicine<br>shop | others | n.r. | total |                                                                                                                             |                                                                                                      |        |                                                                         |        |
| (1)                        | (2)                                                                                                                    | (3)                                                            | (4)              | (5)    | (6)  | (7)   | (8)                                                                                                                         | (9)                                                                                                  | (10)   | (11)                                                                    | (12)   |
| 0 – 225                    | 604                                                                                                                    | 252                                                            | 393              | 355    | 0    | 1000  | 21.6                                                                                                                        | 1722                                                                                                 | 35     | 2853                                                                    | 83     |
| 225 – 255                  | 322                                                                                                                    | 322                                                            | 136              | 543    | 0    | 1000  | 14                                                                                                                          | 737                                                                                                  | 26     | 2291                                                                    | 82     |
| 255 – 300                  | 501                                                                                                                    | 224                                                            | 176              | 600    | 0    | 1000  | 28.5                                                                                                                        | 2883                                                                                                 | 81     | 5756                                                                    | 187    |
| 300 – 340                  | 499                                                                                                                    | 311                                                            | 358              | 330    | 0    | 1000  | 17.9                                                                                                                        | 2716                                                                                                 | 70     | 5439                                                                    | 162    |
| 340 – 380                  | 505                                                                                                                    | 217                                                            | 325              | 458    | 0    | 1000  | 29.6                                                                                                                        | 3139                                                                                                 | 71     | 6210                                                                    | 173    |
| 380 – 420                  | 525                                                                                                                    | 267                                                            | 237              | 496    | 0    | 1000  | 37.8                                                                                                                        | 2941                                                                                                 | 76     | 5599                                                                    | 176    |
| 420 – 470                  | 664                                                                                                                    | 243                                                            | 371              | 385    | 0    | 1000  | 51.8                                                                                                                        | 4432                                                                                                 | 133    | 6678                                                                    | 227    |
| 470 – 525                  | 614                                                                                                                    | 217                                                            | 292              | 491    | 0    | 1000  | 33.5                                                                                                                        | 3924                                                                                                 | 101    | 6386                                                                    | 224    |
| 525 – 615                  | 584                                                                                                                    | 281                                                            | 406              | 283    | 30   | 1000  | 25.6                                                                                                                        | 4030                                                                                                 | 124    | 6900                                                                    | 248    |
| 615 – 775                  | 524                                                                                                                    | 263                                                            | 455              | 282    | 0    | 1000  | 19.9                                                                                                                        | 3183                                                                                                 | 95     | 6079                                                                    | 218    |
| 775 – 950                  | 500                                                                                                                    | 253                                                            | 405              | 341    | 0    | 1000  | 29.4                                                                                                                        | 1562                                                                                                 | 44     | 3127                                                                    | 110    |
| 950 +                      | 372                                                                                                                    | 317                                                            | 241              | 442    | 0    | 1000  | 27.6                                                                                                                        | 1285                                                                                                 | 47     | 3450                                                                    | 134    |
| all                        | 536                                                                                                                    | 256                                                            | 332              | 409    | 4    | 1000  | 29.5                                                                                                                        | 32554                                                                                                | 903    | 60768                                                                   | 2024   |

Table (43): Number per 1000 untreated spells of ailment reporting measures taken for recovery/relief (other than medical treatment), per 1000 distribution of such spells of ailments by measure taken for recovery/relief and average expenditure incurred for such measures for recovery/relief separately for each mpce class

| All-India<br>mpce<br>class | no. per 1000 of<br>spells of<br>ailment<br>reporting<br>recovery /relief<br>measure other<br>than medical<br>treatment | Rural                                                          |                  |        |      |       | av. exp.<br>incurred<br>on<br>recovery<br>/ relief<br>measure<br>other<br>than<br>medical<br>con-<br>sul-<br>ta-<br>tion<br>(Rs. 0.0) | untreated spells of<br>ailment during the<br>last 15 days for<br>which some relief<br>measures taken |        | Persons<br>untreated spells<br>of ailment<br>during the last 15<br>days |        |
|----------------------------|------------------------------------------------------------------------------------------------------------------------|----------------------------------------------------------------|------------------|--------|------|-------|---------------------------------------------------------------------------------------------------------------------------------------|------------------------------------------------------------------------------------------------------|--------|-------------------------------------------------------------------------|--------|
|                            |                                                                                                                        | measure taken for recovery/relief other than medical<br>advice |                  |        |      |       |                                                                                                                                       | estd. no.<br>(00)                                                                                    | sample | estd.<br>no.<br>(00)                                                    | sample |
|                            |                                                                                                                        | whom consulted                                                 |                  |        |      |       |                                                                                                                                       |                                                                                                      |        |                                                                         |        |
|                            |                                                                                                                        | self/other<br>household<br>member/<br>friend                   | medicine<br>shop | others | n.r. | total |                                                                                                                                       |                                                                                                      |        |                                                                         |        |
| (1)                        | (2)                                                                                                                    | (3)                                                            | (4)              | (5)    | (6)  | (7)   | (8)                                                                                                                                   | (9)                                                                                                  | (10)   | (11)                                                                    | (12)   |
| 0 – 225                    | 570                                                                                                                    | 199                                                            | 378              | 423    | 0    | 1000  | 31.8                                                                                                                                  | 3845                                                                                                 | 82     | 6750                                                                    | 191    |
| 225 – 255                  | 376                                                                                                                    | 212                                                            | 277              | 511    | 0    | 1000  | 13.9                                                                                                                                  | 1559                                                                                                 | 55     | 4143                                                                    | 155    |
| 255 – 300                  | 512                                                                                                                    | 188                                                            | 270              | 541    | 0    | 1000  | 25.4                                                                                                                                  | 5476                                                                                                 | 160    | 10693                                                                   | 358    |
| 300 – 340                  | 550                                                                                                                    | 310                                                            | 375              | 316    | 0    | 1000  | 24.5                                                                                                                                  | 5874                                                                                                 | 143    | 10683                                                                   | 317    |
| 340 – 380                  | 466                                                                                                                    | 208                                                            | 351              | 441    | 0    | 1000  | 25.6                                                                                                                                  | 5365                                                                                                 | 140    | 11505                                                                   | 350    |
| 380 – 420                  | 522                                                                                                                    | 229                                                            | 348              | 423    | 1    | 1000  | 48.4                                                                                                                                  | 6175                                                                                                 | 162    | 11837                                                                   | 374    |
| 420 – 470                  | 587                                                                                                                    | 233                                                            | 387              | 380    | 0    | 1000  | 41.5                                                                                                                                  | 7192                                                                                                 | 222    | 12253                                                                   | 435    |
| 470 – 525                  | 633                                                                                                                    | 266                                                            | 245              | 487    | 2    | 1000  | 39.5                                                                                                                                  | 8627                                                                                                 | 228    | 13625                                                                   | 471    |
| 525 – 615                  | 571                                                                                                                    | 238                                                            | 427              | 317    | 18   | 1000  | 28.1                                                                                                                                  | 6927                                                                                                 | 237    | 12137                                                                   | 489    |
| 615 – 775                  | 533                                                                                                                    | 297                                                            | 433              | 271    | 0    | 1000  | 19.9                                                                                                                                  | 5826                                                                                                 | 178    | 10925                                                                   | 412    |
| 775 – 950                  | 477                                                                                                                    | 273                                                            | 325              | 402    | 0    | 1000  | 32.7                                                                                                                                  | 2859                                                                                                 | 83     | 6000                                                                    | 210    |
| 950 +                      | 430                                                                                                                    | 464                                                            | 289              | 247    | 0    | 1000  | 89.8                                                                                                                                  | 2777                                                                                                 | 93     | 6459                                                                    | 249    |
| all                        | 534                                                                                                                    | 254                                                            | 347              | 396    | 2    | 1000  | 34.6                                                                                                                                  | 62503                                                                                                | 1783   | 117009                                                                  | 4011   |

Table (43): Number per 1000 untreated spells of ailment reporting measures taken for recovery/relief (other than medical treatment), per 1000 distribution of such spells of ailments by measure taken for recovery/relief and average expenditure incurred for such measures for recovery/relief separately for each mpce class

| All-India<br>mpce class | no. per 1000 of spells of ailment reporting recovery /relief measure other than medical treatment | Urban                                                       |               |        |      |       | av. exp. incurred on recovery / relief measure other than medical consultation (Rs. 0.0) | untreated spells of ailment during the last 15 days for which some relief measures taken |        | Males<br>untreated spells of ailment during the last 15 days |        |
|-------------------------|---------------------------------------------------------------------------------------------------|-------------------------------------------------------------|---------------|--------|------|-------|------------------------------------------------------------------------------------------|------------------------------------------------------------------------------------------|--------|--------------------------------------------------------------|--------|
|                         |                                                                                                   | measure taken for recovery/relief other than medical advice |               |        |      |       |                                                                                          | estd. no. (00)                                                                           | sample | estd. no. (00)                                               | sample |
|                         |                                                                                                   | whom consulted                                              |               |        |      |       |                                                                                          |                                                                                          |        |                                                              |        |
|                         |                                                                                                   | self/other household member/friend                          | medicine shop | others | n.r. | total |                                                                                          |                                                                                          |        |                                                              |        |
| (1)                     | (2)                                                                                               | (3)                                                         | (4)           | (5)    | (6)  | (7)   | (8)                                                                                      | (9)                                                                                      | (10)   | (11)                                                         | (12)   |
| 0-300                   | 642                                                                                               | 399                                                         | 465           | 136    | 0    | 1000  | 20.5                                                                                     | 329                                                                                      | 16     | 512                                                          | 33     |
| 300-350                 | 607                                                                                               | 514                                                         | 449           | 37     | 0    | 1000  | 12.5                                                                                     | 285                                                                                      | 10     | 469                                                          | 18     |
| 350-425                 | 478                                                                                               | 417                                                         | 261           | 322    | 0    | 1000  | 32.9                                                                                     | 439                                                                                      | 21     | 919                                                          | 66     |
| 425-500                 | 475                                                                                               | 78                                                          | 697           | 225    | 0    | 1000  | 13.2                                                                                     | 840                                                                                      | 35     | 1766                                                         | 108    |
| 500-575                 | 284                                                                                               | 45                                                          | 701           | 253    | 0    | 1000  | 9.2                                                                                      | 157                                                                                      | 19     | 552                                                          | 53     |
| 575-665                 | 564                                                                                               | 201                                                         | 541           | 259    | 0    | 1000  | 48.7                                                                                     | 722                                                                                      | 39     | 1281                                                         | 80     |
| 665-775                 | 395                                                                                               | 491                                                         | 450           | 59     | 0    | 1000  | 9.1                                                                                      | 477                                                                                      | 22     | 1206                                                         | 90     |
| 775-915                 | 518                                                                                               | 356                                                         | 585           | 59     | 0    | 1000  | 14.9                                                                                     | 552                                                                                      | 29     | 1067                                                         | 81     |
| 915-1120                | 684                                                                                               | 463                                                         | 500           | 37     | 0    | 1000  | 76.2                                                                                     | 1005                                                                                     | 40     | 1468                                                         | 82     |
| 1120-1500               | 493                                                                                               | 342                                                         | 530           | 128    | 0    | 1000  | 15.6                                                                                     | 979                                                                                      | 44     | 1984                                                         | 108    |
| 1500-1925               | 809                                                                                               | 710                                                         | 271           | 19     | 0    | 1000  | 19.7                                                                                     | 521                                                                                      | 17     | 644                                                          | 32     |
| 1925+                   | 520                                                                                               | 764                                                         | 49            | 187    | 0    | 1000  | 39.6                                                                                     | 485                                                                                      | 22     | 934                                                          | 60     |
| all                     | 530                                                                                               | 390                                                         | 472           | 138    | 0    | 1000  | 27.8                                                                                     | 6790                                                                                     | 314    | 12802                                                        | 811    |

Table (43): Number per 1000 untreated spells of ailment reporting measures taken for recovery/relief (other than medical treatment), per 1000 distribution of such spells of ailments by measure taken for recovery/relief and average expenditure incurred for such measures for recovery/relief separately for each mpce class

| All-India<br>mpce<br>class | no. per 1000 of<br>spells of<br>ailment<br>reporting<br>recovery /relief<br>measure other<br>than medical<br>treatment | Urban                                                          |                  |        |      |       | av. exp.<br>incurred<br>on<br>recovery<br>/ relief<br>measure<br>other<br>than<br>medical<br>consul-<br>tation<br>(Rs. 0.0) | untreated spells of<br>ailment during the<br>last 15 days for<br>which some relief<br>measures taken |        | Females<br>untreated spells<br>of ailment<br>during the last 15<br>days |        |
|----------------------------|------------------------------------------------------------------------------------------------------------------------|----------------------------------------------------------------|------------------|--------|------|-------|-----------------------------------------------------------------------------------------------------------------------------|------------------------------------------------------------------------------------------------------|--------|-------------------------------------------------------------------------|--------|
|                            |                                                                                                                        | measure taken for recovery/relief other than medical<br>advice |                  |        |      |       |                                                                                                                             | estd. no.<br>(00)                                                                                    | sample | estd.<br>no.<br>(00)                                                    | sample |
|                            |                                                                                                                        | whom consulted                                                 |                  |        |      |       |                                                                                                                             |                                                                                                      |        |                                                                         |        |
|                            |                                                                                                                        | self/other<br>household<br>member/<br>friend                   | medicine<br>shop | others | n.r. | total |                                                                                                                             |                                                                                                      |        |                                                                         |        |
| (1)                        | (2)                                                                                                                    | (3)                                                            | (4)              | (5)    | (6)  | (7)   | (8)                                                                                                                         | (9)                                                                                                  | (10)   | (11)                                                                    | (12)   |
| 0-300                      | 303                                                                                                                    | 0                                                              | 756              | 244    | 0    | 1000  | 5.9                                                                                                                         | 235                                                                                                  | 15     | 777                                                                     | 47     |
| 300-350                    | 304                                                                                                                    | 17                                                             | 720              | 263    | 0    | 1000  | 12.2                                                                                                                        | 94                                                                                                   | 10     | 309                                                                     | 26     |
| 350-425                    | 689                                                                                                                    | 269                                                            | 722              | 10     | 0    | 1000  | 7.4                                                                                                                         | 824                                                                                                  | 31     | 1196                                                                    | 67     |
| 425-500                    | 465                                                                                                                    | 94                                                             | 680              | 226    | 0    | 1000  | 17.3                                                                                                                        | 970                                                                                                  | 45     | 2085                                                                    | 117    |
| 500-575                    | 381                                                                                                                    | 103                                                            | 879              | 18     | 0    | 1000  | 9.9                                                                                                                         | 286                                                                                                  | 23     | 752                                                                     | 53     |
| 575-665                    | 498                                                                                                                    | 169                                                            | 721              | 110    | 0    | 1000  | 29                                                                                                                          | 707                                                                                                  | 41     | 1420                                                                    | 95     |
| 665-775                    | 432                                                                                                                    | 415                                                            | 375              | 210    | 0    | 1000  | 18.9                                                                                                                        | 730                                                                                                  | 37     | 1690                                                                    | 106    |
| 775-915                    | 369                                                                                                                    | 245                                                            | 708              | 47     | 0    | 1000  | 9.2                                                                                                                         | 455                                                                                                  | 31     | 1232                                                                    | 101    |
| 915-1120                   | 562                                                                                                                    | 463                                                            | 428              | 109    | 0    | 1000  | 12.1                                                                                                                        | 1064                                                                                                 | 42     | 1893                                                                    | 107    |
| 1120-1500                  | 633                                                                                                                    | 677                                                            | 297              | 26     | 0    | 1000  | 17.9                                                                                                                        | 1507                                                                                                 | 56     | 2382                                                                    | 128    |
| 1500-1925                  | 635                                                                                                                    | 583                                                            | 354              | 63     | 0    | 1000  | 16.3                                                                                                                        | 492                                                                                                  | 18     | 775                                                                     | 40     |
| 1925+                      | 688                                                                                                                    | 868                                                            | 81               | 51     | 0    | 1000  | 30.3                                                                                                                        | 555                                                                                                  | 23     | 806                                                                     | 48     |
| all                        | 517                                                                                                                    | 399                                                            | 503              | 98     | 0    | 1000  | 16.2                                                                                                                        | 7919                                                                                                 | 372    | 15318                                                                   | 935    |

Table (43): Number per 1000 untreated spells of ailment reporting measures taken for recovery/relief (other than medical treatment), per 1000 distribution of such spells of ailments by measure taken for recovery/relief and average expenditure incurred for such measures for recovery/relief separately for each mpce class

| All-India<br>mpce class | no. per 1000 of spells of ailment reporting recovery /relief measure other than medical treatment | Urban                                                       |               |        |      |       | av. exp. incurred on recovery / relief measure other than medical consultation (Rs. 0.0) | untreated spells of ailment during the last 15 days for which some relief measures taken |        | Persons        |        |
|-------------------------|---------------------------------------------------------------------------------------------------|-------------------------------------------------------------|---------------|--------|------|-------|------------------------------------------------------------------------------------------|------------------------------------------------------------------------------------------|--------|----------------|--------|
|                         |                                                                                                   | measure taken for recovery/relief other than medical advice |               |        |      |       |                                                                                          | estd. no. (00)                                                                           | sample | estd. no. (00) | sample |
|                         |                                                                                                   | whom consulted                                              |               |        |      |       |                                                                                          |                                                                                          |        |                |        |
|                         |                                                                                                   | self/other household member/friend                          | medicine shop | others | n.r. | total |                                                                                          |                                                                                          |        |                |        |
| (1)                     | (2)                                                                                               | (3)                                                         | (4)           | (5)    | (6)  | (7)   | (8)                                                                                      | (9)                                                                                      | (10)   | (11)           | (12)   |
| 0-300                   | 438                                                                                               | 233                                                         | 586           | 181    | 0    | 1000  | 11.7                                                                                     | 564                                                                                      | 31     | 1289           | 80     |
| 300-350                 | 486                                                                                               | 390                                                         | 517           | 93     | 0    | 1000  | 12.4                                                                                     | 379                                                                                      | 20     | 779            | 44     |
| 350-425                 | 597                                                                                               | 320                                                         | 561           | 118    | 0    | 1000  | 18.5                                                                                     | 1263                                                                                     | 52     | 2115           | 133    |
| 425-500                 | 470                                                                                               | 87                                                          | 688           | 225    | 0    | 1000  | 15.4                                                                                     | 1810                                                                                     | 80     | 3852           | 225    |
| 500-575                 | 340                                                                                               | 83                                                          | 816           | 101    | 0    | 1000  | 9.6                                                                                      | 443                                                                                      | 42     | 1304           | 106    |
| 575-665                 | 529                                                                                               | 185                                                         | 630           | 185    | 0    | 1000  | 38.3                                                                                     | 1430                                                                                     | 80     | 2701           | 175    |
| 665-775                 | 417                                                                                               | 445                                                         | 405           | 150    | 0    | 1000  | 14.8                                                                                     | 1206                                                                                     | 59     | 2896           | 196    |
| 775-915                 | 438                                                                                               | 306                                                         | 641           | 53     | 0    | 1000  | 11.9                                                                                     | 1007                                                                                     | 60     | 2299           | 182    |
| 915-1120                | 615                                                                                               | 463                                                         | 463           | 74     | 0    | 1000  | 40.1                                                                                     | 2069                                                                                     | 82     | 3361           | 189    |
| 1120-1500               | 569                                                                                               | 545                                                         | 389           | 66     | 0    | 1000  | 16.8                                                                                     | 2486                                                                                     | 100    | 4366           | 236    |
| 1500-1925               | 714                                                                                               | 648                                                         | 312           | 40     | 0    | 1000  | 17.8                                                                                     | 1012                                                                                     | 35     | 1419           | 72     |
| 1925+                   | 598                                                                                               | 819                                                         | 66            | 115    | 0    | 1000  | 35.3                                                                                     | 1040                                                                                     | 45     | 1739           | 108    |
| all                     | 523                                                                                               | 395                                                         | 489           | 117    | 0    | 1000  | 21.5                                                                                     | 14710                                                                                    | 686    | 28120          | 1746   |

Table (43): Number per 1000 untreated spells of ailment reporting measures taken for recovery/relief (other than medical treatment), per 1000 distribution of such spells of ailments by measure taken for recovery/relief and average expenditure incurred for such measures for recovery/relief separately for each mpce class

| All-India<br>mpce<br>class | no. per 1000 of<br>spells of<br>ailment<br>reporting<br>recovery /relief<br>measure other<br>than medical<br>treatment | Rural +Urban                                                   |                  |        |      |       | av. exp.<br>incurred<br>on<br>recovery<br>/ relief<br>measure<br>other<br>than<br>medical<br>consul-<br>tation<br>(Rs. 0.0) | untreated spells of<br>ailment during the<br>last 15 days for<br>which some relief<br>measures taken |        | Males<br>untreated spells<br>of ailment<br>during the last 15<br>days |        |
|----------------------------|------------------------------------------------------------------------------------------------------------------------|----------------------------------------------------------------|------------------|--------|------|-------|-----------------------------------------------------------------------------------------------------------------------------|------------------------------------------------------------------------------------------------------|--------|-----------------------------------------------------------------------|--------|
|                            |                                                                                                                        | measure taken for recovery/relief other than medical<br>advice |                  |        |      |       |                                                                                                                             | estd. no.<br>(00)                                                                                    | sample | estd.<br>no.<br>(00)                                                  | sample |
|                            |                                                                                                                        | whom consulted                                                 |                  |        |      |       |                                                                                                                             |                                                                                                      |        |                                                                       |        |
|                            |                                                                                                                        | self/other<br>household<br>member/<br>friend                   | medicine<br>shop | others | n.r. | total |                                                                                                                             |                                                                                                      |        |                                                                       |        |
| (1)                        | (2)                                                                                                                    | (3)                                                            | (4)              | (5)    | (6)  | (7)   | (8)                                                                                                                         | (9)                                                                                                  | (10)   | (11)                                                                  | (12)   |
| 0 – 235                    | 556                                                                                                                    | 189                                                            | 380              | 432    | 0    | 1000  | 37.1                                                                                                                        | 2452                                                                                                 | 63     | 4410                                                                  | 141    |
| 235 – 265                  | 477                                                                                                                    | 217                                                            | 415              | 367    | 0    | 1000  | 13.5                                                                                                                        | 1107                                                                                                 | 39     | 2321                                                                  | 91     |
| 265 – 320                  | 518                                                                                                                    | 187                                                            | 359              | 454    | 0    | 1000  | 23.4                                                                                                                        | 3033                                                                                                 | 100    | 5856                                                                  | 237    |
| 320 – 365                  | 570                                                                                                                    | 260                                                            | 453              | 287    | 0    | 1000  | 26.8                                                                                                                        | 3997                                                                                                 | 108    | 7010                                                                  | 263    |
| 365 – 410                  | 408                                                                                                                    | 186                                                            | 408              | 407    | 0    | 1000  | 19.7                                                                                                                        | 2383                                                                                                 | 88     | 5846                                                                  | 230    |
| 410 – 460                  | 526                                                                                                                    | 195                                                            | 466              | 339    | 1    | 1000  | 56.4                                                                                                                        | 3956                                                                                                 | 125    | 7519                                                                  | 278    |
| 460 – 520                  | 477                                                                                                                    | 257                                                            | 417              | 326    | 0    | 1000  | 25.6                                                                                                                        | 3237                                                                                                 | 111    | 6781                                                                  | 298    |
| 520 – 605                  | 633                                                                                                                    | 312                                                            | 246              | 439    | 3    | 1000  | 41                                                                                                                          | 5256                                                                                                 | 156    | 8306                                                                  | 328    |
| 605 – 730                  | 582                                                                                                                    | 252                                                            | 468              | 280    | 0    | 1000  | 41.1                                                                                                                        | 3902                                                                                                 | 153    | 6705                                                                  | 323    |
| 730 – 980                  | 530                                                                                                                    | 338                                                            | 439              | 222    | 0    | 1000  | 18.7                                                                                                                        | 3622                                                                                                 | 127    | 6829                                                                  | 302    |
| 980 – 1285                 | 517                                                                                                                    | 415                                                            | 240              | 345    | 0    | 1000  | 33.3                                                                                                                        | 1818                                                                                                 | 56     | 3517                                                                  | 132    |
| 1285 +                     | 502                                                                                                                    | 634                                                            | 262              | 105    | 0    | 1000  | 132.3                                                                                                                       | 1977                                                                                                 | 68     | 3942                                                                  | 175    |
| all                        | 532                                                                                                                    | 278                                                            | 384              | 337    | 0    | 1000  | 37.9                                                                                                                        | 36740                                                                                                | 1194   | 69043                                                                 | 2798   |

Table (43): Number per 1000 untreated spells of ailment reporting measures taken for recovery/relief (other than medical treatment), per 1000 distribution of such spells of ailments by measure taken for recovery/relief and average expenditure incurred for such measures for recovery/relief separately for each mpce class

| All-India<br>mpce<br>class | no. per 1000 of<br>spells of<br>ailment<br>reporting<br>recovery /relief<br>measure other<br>than medical<br>treatment | Rural +Urban                                                   |                  |        |      |       | av. exp.<br>incurred<br>on<br>recovery<br>/ relief<br>measure<br>other<br>than<br>medical<br>consul-<br>tation<br>(Rs. 0.0) | untreated spells of<br>ailment during the<br>last 15 days for<br>which some relief<br>measures taken |        | Females<br>untreated spells<br>of ailment<br>during the last 15<br>days |        |
|----------------------------|------------------------------------------------------------------------------------------------------------------------|----------------------------------------------------------------|------------------|--------|------|-------|-----------------------------------------------------------------------------------------------------------------------------|------------------------------------------------------------------------------------------------------|--------|-------------------------------------------------------------------------|--------|
|                            |                                                                                                                        | measure taken for recovery/relief other than medical<br>advice |                  |        |      |       |                                                                                                                             | estd. no.<br>(00)                                                                                    | sample | estd.<br>no.<br>(00)                                                    | sample |
|                            |                                                                                                                        | whom consulted                                                 |                  |        |      |       |                                                                                                                             |                                                                                                      |        |                                                                         |        |
|                            |                                                                                                                        | self/other<br>household<br>member/<br>friend                   | medicine<br>shop | others | n.r. | total |                                                                                                                             |                                                                                                      |        |                                                                         |        |
| (1)                        | (2)                                                                                                                    | (3)                                                            | (4)              | (5)    | (6)  | (7)   | (8)                                                                                                                         | (9)                                                                                                  | (10)   | (11)                                                                    | (12)   |
| 0 – 235                    | 539                                                                                                                    | 222                                                            | 436              | 342    | 0    | 1000  | 18.2                                                                                                                        | 1958                                                                                                 | 50     | 3630                                                                    | 130    |
| 235 – 265                  | 319                                                                                                                    | 287                                                            | 202              | 511    | 0    | 1000  | 13.8                                                                                                                        | 831                                                                                                  | 36     | 2600                                                                    | 108    |
| 265 – 320                  | 533                                                                                                                    | 234                                                            | 297              | 469    | 0    | 1000  | 24.9                                                                                                                        | 3707                                                                                                 | 112    | 6952                                                                    | 254    |
| 320 – 365                  | 490                                                                                                                    | 254                                                            | 443              | 303    | 0    | 1000  | 17.7                                                                                                                        | 3687                                                                                                 | 115    | 7525                                                                    | 279    |
| 365 – 410                  | 492                                                                                                                    | 208                                                            | 372              | 421    | 0    | 1000  | 27.5                                                                                                                        | 3425                                                                                                 | 94     | 6963                                                                    | 226    |
| 410 – 460                  | 520                                                                                                                    | 248                                                            | 331              | 421    | 0    | 1000  | 36                                                                                                                          | 3648                                                                                                 | 117    | 7019                                                                    | 271    |
| 460 – 520                  | 617                                                                                                                    | 268                                                            | 372              | 360    | 0    | 1000  | 45.2                                                                                                                        | 5161                                                                                                 | 170    | 8367                                                                    | 333    |
| 520 – 605                  | 575                                                                                                                    | 220                                                            | 335              | 444    | 0    | 1000  | 29.5                                                                                                                        | 4379                                                                                                 | 132    | 7618                                                                    | 325    |
| 605 – 730                  | 579                                                                                                                    | 319                                                            | 411              | 246    | 24   | 1000  | 22.7                                                                                                                        | 5095                                                                                                 | 166    | 8793                                                                    | 355    |
| 730 – 980                  | 554                                                                                                                    | 396                                                            | 404              | 199    | 0    | 1000  | 19.3                                                                                                                        | 4690                                                                                                 | 151    | 8461                                                                    | 346    |
| 980 – 1285                 | 526                                                                                                                    | 332                                                            | 393              | 275    | 0    | 1000  | 26.8                                                                                                                        | 2054                                                                                                 | 62     | 3901                                                                    | 150    |
| 1285 +                     | 432                                                                                                                    | 483                                                            | 193              | 325    | 0    | 1000  | 28.1                                                                                                                        | 1840                                                                                                 | 70     | 4256                                                                    | 182    |
| all                        | 532                                                                                                                    | 284                                                            | 365              | 348    | 3    | 1000  | 26.9                                                                                                                        | 40473                                                                                                | 1275   | 76086                                                                   | 2959   |

Table (43): Number per 1000 untreated spells of ailment reporting measures taken for recovery/relief (other than medical treatment), per 1000 distribution of such spells of ailments by measure taken for recovery/relief and average expenditure incurred for such measures for recovery/relief separately for each mpce class

| All-India<br>mpce<br>class | no. per 1000 of<br>spells of<br>ailment<br>reporting<br>recovery /relief<br>measure other<br>than medical<br>treatment | Rural +Urban                                                   |                  |        |      |       | av. exp.<br>incurred<br>on<br>recovery<br>/ relief<br>measure<br>other<br>than<br>medical<br>con-<br>sul-<br>ta-<br>tion<br>(Rs. 0.0) | untreated spells of<br>ailment during the<br>last 15 days for<br>which some relief<br>measures taken |        | Persons<br>untreated spells<br>of ailment<br>during the last 15<br>days |        |
|----------------------------|------------------------------------------------------------------------------------------------------------------------|----------------------------------------------------------------|------------------|--------|------|-------|---------------------------------------------------------------------------------------------------------------------------------------|------------------------------------------------------------------------------------------------------|--------|-------------------------------------------------------------------------|--------|
|                            |                                                                                                                        | measure taken for recovery/relief other than medical<br>advice |                  |        |      |       |                                                                                                                                       | estd. no.<br>(00)                                                                                    | sample | estd.<br>no.<br>(00)                                                    | sample |
|                            |                                                                                                                        | whom consulted                                                 |                  |        |      |       |                                                                                                                                       |                                                                                                      |        |                                                                         |        |
|                            |                                                                                                                        | self/other<br>household<br>member/<br>friend                   | medicine<br>shop | others | n.r. | total |                                                                                                                                       |                                                                                                      |        |                                                                         |        |
| (1)                        | (2)                                                                                                                    | (3)                                                            | (4)              | (5)    | (6)  | (7)   | (8)                                                                                                                                   | (9)                                                                                                  | (10)   | (11)                                                                    | (12)   |
| 0 – 235                    | 548                                                                                                                    | 203                                                            | 405              | 392    | 0    | 1000  | 28.6                                                                                                                                  | 4409                                                                                                 | 113    | 8040                                                                    | 271    |
| 235 – 265                  | 394                                                                                                                    | 247                                                            | 324              | 429    | 0    | 1000  | 13.6                                                                                                                                  | 1937                                                                                                 | 75     | 4921                                                                    | 199    |
| 265 – 320                  | 526                                                                                                                    | 213                                                            | 325              | 462    | 0    | 1000  | 24.2                                                                                                                                  | 6740                                                                                                 | 212    | 12808                                                                   | 491    |
| 320 – 365                  | 529                                                                                                                    | 257                                                            | 448              | 294    | 0    | 1000  | 22.1                                                                                                                                  | 7684                                                                                                 | 223    | 14535                                                                   | 542    |
| 365 – 410                  | 453                                                                                                                    | 199                                                            | 386              | 415    | 0    | 1000  | 23.9                                                                                                                                  | 5808                                                                                                 | 182    | 12809                                                                   | 456    |
| 410 – 460                  | 523                                                                                                                    | 220                                                            | 401              | 378    | 0    | 1000  | 46.5                                                                                                                                  | 7604                                                                                                 | 242    | 14538                                                                   | 549    |
| 460 – 520                  | 554                                                                                                                    | 264                                                            | 389              | 347    | 0    | 1000  | 36.4                                                                                                                                  | 8398                                                                                                 | 281    | 15149                                                                   | 631    |
| 520 – 605                  | 605                                                                                                                    | 270                                                            | 287              | 442    | 1    | 1000  | 35.5                                                                                                                                  | 9634                                                                                                 | 288    | 15924                                                                   | 653    |
| 605 – 730                  | 580                                                                                                                    | 290                                                            | 435              | 261    | 14   | 1000  | 30.7                                                                                                                                  | 8996                                                                                                 | 319    | 15498                                                                   | 678    |
| 730 – 980                  | 544                                                                                                                    | 371                                                            | 420              | 209    | 0    | 1000  | 19                                                                                                                                    | 8312                                                                                                 | 278    | 15291                                                                   | 648    |
| 980 – 1285                 | 522                                                                                                                    | 371                                                            | 321              | 308    | 0    | 1000  | 29.9                                                                                                                                  | 3872                                                                                                 | 118    | 7418                                                                    | 282    |
| 1285 +                     | 466                                                                                                                    | 561                                                            | 228              | 211    | 0    | 1000  | 78.2                                                                                                                                  | 3817                                                                                                 | 138    | 8198                                                                    | 357    |
| all                        | 532                                                                                                                    | 281                                                            | 374              | 343    | 2    | 1000  | 32.1                                                                                                                                  | 77213                                                                                                | 2469   | 145129                                                                  | 5757   |



Table (44): Average medical expenditure (Rs.) for treatment (other than as inpatient) under different heads per ailing person medically treated during last 15 days by mpce class

| all-India    |                                                                                                                         | Rural             |                  |                    |                 |                |                |               |                                |           |                     |               | Males        |       |                   |                                                               |         |                                               |         |
|--------------|-------------------------------------------------------------------------------------------------------------------------|-------------------|------------------|--------------------|-----------------|----------------|----------------|---------------|--------------------------------|-----------|---------------------|---------------|--------------|-------|-------------------|---------------------------------------------------------------|---------|-----------------------------------------------|---------|
| mpce class   | average medical expenditure (Rs.) for treatment under different heads for treatment other than as inpatient incurred on |                   |                  |                    |                 |                |                |               |                                |           |                     |               |              |       | estd. expn. (000) | persons treated medically on payment during last 15 days (00) |         | persons treated medically during last 15 days |         |
|              | services                                                                                                                |                   |                  |                    |                 |                | goods          |               |                                |           |                     | total (govt.) | total (pvt.) | total |                   | estd. (00)                                                    | sam-ple | estd. (00)                                    | sam-ple |
|              | doctor's/surgeons fee                                                                                                   |                   | diag-nostic test | atten-dant charges | physio the-rapy | other services | medicines      |               | perso-nal medi-cal applia-nces | food etc. | blood oxy-gen, etc. |               |              |       |                   |                                                               |         |                                               |         |
|              | hospi-tal staff                                                                                                         | other specia-list |                  |                    |                 |                | from hos-pital | from out-side |                                |           |                     |               |              |       |                   |                                                               |         |                                               |         |
| (1)          | (2)                                                                                                                     | (3)               | (4)              | (5)                | (6)             | (7)            | (8)            | (9)           | (10)                           | (11)      | (12)                | (13)          | (14)         | (15)  | (16)              | (17)                                                          | (18)    | (19)                                          | (20)    |
| 0 – 225      | 10                                                                                                                      | 3                 | 5                | 0                  | 0               | 0              | 8              | 88            | 0                              | 3         | 0                   | 5             | 111          | 116   | 82862             | 7076                                                          | 233     | 10079                                         | 334     |
| 225 – 255    | 5                                                                                                                       | 8                 | 6                | 0                  | 0               | 0              | 2              | 106           | 0                              | 12        | 0                   | 3             | 133          | 136   | 74433             | 5334                                                          | 160     | 7463                                          | 230     |
| 255 – 300    | 8                                                                                                                       | 5                 | 9                | 0                  | 0               | 0              | 5              | 116           | 0                              | 6         | 0                   | 5             | 145          | 150   | 182276            | 12112                                                         | 402     | 17461                                         | 579     |
| 300 – 340    | 8                                                                                                                       | 4                 | 3                | 0                  | 0               | 0              | 7              | 99            | 0                              | 3         | 0                   | 6             | 119          | 125   | 138285            | 11103                                                         | 389     | 16024                                         | 557     |
| 340 – 380    | 10                                                                                                                      | 13                | 5                | 1                  | 0               | 0              | 3              | 142           | 0                              | 4         | 2                   | 18            | 163          | 181   | 283097            | 15624                                                         | 517     | 21552                                         | 725     |
| 380 – 420    | 11                                                                                                                      | 4                 | 7                | 0                  | 0               | 2              | 7              | 152           | 0                              | 4         | 0                   | 11            | 175          | 187   | 328008            | 17502                                                         | 627     | 23503                                         | 848     |
| 420 – 470    | 17                                                                                                                      | 11                | 7                | 0                  | 0               | 1              | 18             | 143           | 2                              | 3         | 0                   | 8             | 194          | 202   | 371375            | 18262                                                         | 699     | 25656                                         | 949     |
| 470 – 525    | 11                                                                                                                      | 11                | 8                | 0                  | 0               | 2              | 24             | 150           | 4                              | 6         | 0                   | 14            | 200          | 215   | 445216            | 20695                                                         | 768     | 27510                                         | 1044    |
| 525 – 615    | 16                                                                                                                      | 11                | 14               | 0                  | 0               | 0              | 24             | 139           | 0                              | 5         | 0                   | 5             | 203          | 208   | 439401            | 21021                                                         | 818     | 27930                                         | 1109    |
| 615 – 775    | 16                                                                                                                      | 11                | 19               | 0                  | 0               | 0              | 16             | 159           | 0                              | 2         | 0                   | 4             | 218          | 222   | 571059            | 25668                                                         | 1028    | 34167                                         | 1365    |
| 775 – 950    | 19                                                                                                                      | 11                | 10               | 0                  | 0               | 1              | 17             | 155           | 0                              | 2         | 0                   | 4             | 211          | 215   | 285511            | 13262                                                         | 504     | 18481                                         | 708     |
| 950 +        | 17                                                                                                                      | 9                 | 19               | 0                  | 0               | 1              | 28             | 228           | 4                              | 3         | 1                   | 5             | 302          | 308   | 504638            | 16385                                                         | 680     | 21901                                         | 942     |
| all classes  | 13                                                                                                                      | 9                 | 10               | 0                  | 0               | 1              | 15             | 147           | 1                              | 4         | 0                   | 8             | 193          | 201   | 3706161           | 184044                                                        | 6825    | 251729                                        | 9390    |
| social group |                                                                                                                         |                   |                  |                    |                 |                |                |               |                                |           |                     |               |              |       |                   |                                                               |         |                                               |         |
| ST           | 6                                                                                                                       | 7                 | 5                | 0                  | 0               | 0              | 8              | 114           | 0                              | 6         | 0                   | 4             | 142          | 146   | 152801            | 10457                                                         | 544     | 14244                                         | 763     |
| SC           | 11                                                                                                                      | 7                 | 8                | 0                  | 0               | 1              | 15             | 121           | 1                              | 4         | 0                   | 6             | 161          | 167   | 657295            | 39292                                                         | 1319    | 52606                                         | 1782    |
| OBC          | 16                                                                                                                      | 7                 | 10               | 0                  | 0               | 1              | 16             | 147           | 1                              | 4         | 0                   | 7             | 194          | 201   | 1513312           | 74955                                                         | 2750    | 104030                                        | 3848    |
| others       | 13                                                                                                                      | 14                | 13               | 0                  | 0               | 1              | 16             | 170           | 2                              | 3         | 1                   | 11            | 221          | 232   | 1382747           | 59339                                                         | 2211    | 80849                                         | 2996    |
| all          | 13                                                                                                                      | 9                 | 10               | 0                  | 0               | 1              | 15             | 147           | 1                              | 4         | 0                   | 8             | 193          | 201   | 3706161           | 184044                                                        | 6825    | 251729                                        | 9390    |

Table (44): Average medical expenditure (Rs.) for treatment (other than as inpatient) under different heads per ailing person medically treated during last 15 days by mpce class

| all-India    |                                                                                                                         | Rural             |                  |                    |                 |                |                |               |                                |           |                     |               |              |       | Female s          |                                                               |         |                                               |         |
|--------------|-------------------------------------------------------------------------------------------------------------------------|-------------------|------------------|--------------------|-----------------|----------------|----------------|---------------|--------------------------------|-----------|---------------------|---------------|--------------|-------|-------------------|---------------------------------------------------------------|---------|-----------------------------------------------|---------|
| mpce class   | average medical expenditure (Rs.) for treatment under different heads for treatment other than as inpatient incurred on |                   |                  |                    |                 |                |                |               |                                |           |                     |               |              |       | estd. expn. (000) | persons treated medically on payment during last 15 days (00) |         | persons treated medically during last 15 days |         |
|              | services                                                                                                                |                   |                  |                    |                 |                | goods          |               |                                |           |                     | total (govt.) | total (pvt.) | total |                   | estd. (00)                                                    | sam-ple | estd. (00)                                    | sam-ple |
|              | doctor's/ surgeons fee                                                                                                  |                   | diag-nostic test | atten-dant charges | physio the-rapy | other services | medicines      |               | perso-nal medi-cal applia-nces | food etc. | blood oxy-gen, etc. |               |              |       |                   |                                                               |         |                                               |         |
|              | hospi-tal staff                                                                                                         | other specia-list |                  |                    |                 |                | from hos-pital | from out-side |                                |           |                     |               |              |       |                   |                                                               |         |                                               |         |
| (1)          | (2)                                                                                                                     | (3)               | (4)              | (5)                | (6)             | (7)            | (8)            | (9)           | (10)                           | (11)      | (12)                | (13)          | (14)         | (15)  | (16)              | (17)                                                          | (18)    | (19)                                          | (20)    |
| 0 – 225      | 8                                                                                                                       | 6                 | 2                | 0                  | 0               | 0              | 3              | 80            | 0                              | 3         | 0                   | 5             | 96           | 102   | 72785             | 7162                                                          | 218     | 10659                                         | 328     |
| 225 – 255    | 11                                                                                                                      | 5                 | 15               | 4                  | 1               | 0              | 6              | 134           | 0                              | 13        | 0                   | 6             | 181          | 187   | 85556             | 4556                                                          | 150     | 6830                                          | 229     |
| 255 – 300    | 10                                                                                                                      | 4                 | 4                | 0                  | 0               | 0              | 2              | 116           | 0                              | 5         | 0                   | 16            | 125          | 141   | 184704            | 13001                                                         | 409     | 18164                                         | 574     |
| 300 – 340    | 12                                                                                                                      | 7                 | 9                | 0                  | 0               | 0              | 6              | 120           | 0                              | 4         | 0                   | 8             | 151          | 158   | 182695            | 11528                                                         | 406     | 16093                                         | 579     |
| 340 – 380    | 9                                                                                                                       | 8                 | 6                | 0                  | 0               | 1              | 8              | 125           | 0                              | 5         | 0                   | 6             | 155          | 161   | 258994            | 16058                                                         | 574     | 22381                                         | 784     |
| 380 – 420    | 16                                                                                                                      | 6                 | 21               | 0                  | 0               | 3              | 12             | 120           | 0                              | 3         | 0                   | 15            | 165          | 180   | 323074            | 17943                                                         | 644     | 23951                                         | 835     |
| 420 – 470    | 9                                                                                                                       | 9                 | 3                | 0                  | 0               | 0              | 12             | 125           | 0                              | 2         | 0                   | 6             | 154          | 160   | 353254            | 21973                                                         | 731     | 28355                                         | 957     |
| 470 – 525    | 15                                                                                                                      | 9                 | 7                | 0                  | 0               | 0              | 16             | 160           | 0                              | 5         | 1                   | 11            | 201          | 212   | 503000            | 23628                                                         | 796     | 30357                                         | 1056    |
| 525 – 615    | 14                                                                                                                      | 12                | 8                | 0                  | 0               | 0              | 17             | 148           | 0                              | 2         | 0                   | 5             | 198          | 203   | 433455            | 21337                                                         | 811     | 27994                                         | 1084    |
| 615 – 775    | 14                                                                                                                      | 8                 | 13               | 1                  | 0               | 0              | 20             | 157           | 1                              | 3         | 0                   | 5             | 212          | 217   | 578478            | 26522                                                         | 1080    | 34734                                         | 1424    |
| 775 – 950    | 20                                                                                                                      | 8                 | 12               | 0                  | 0               | 0              | 9              | 193           | 0                              | 3         | 0                   | 10            | 236          | 245   | 419541            | 17043                                                         | 593     | 21768                                         | 793     |
| 950 +        | 18                                                                                                                      | 11                | 13               | 3                  | 1               | 1              | 15             | 221           | 0                              | 4         | 2                   | 12            | 275          | 287   | 590491            | 20502                                                         | 767     | 27570                                         | 1052    |
| all classes  | 14                                                                                                                      | 8                 | 10               | 1                  | 0               | 1              | 12             | 149           | 0                              | 4         | 0                   | 9             | 189          | 197   | 3986027           | 201253                                                        | 7179    | 268855                                        | 9695    |
| social group |                                                                                                                         |                   |                  |                    |                 |                |                |               |                                |           |                     |               |              |       |                   |                                                               |         |                                               |         |
| ST           | 10                                                                                                                      | 6                 | 9                | 0                  | 0               | 1              | 5              | 109           | 0                              | 4         | 0                   | 5             | 139          | 144   | 188618            | 13083                                                         | 555     | 17867                                         | 772     |
| SC           | 11                                                                                                                      | 8                 | 6                | 0                  | 0               | 0              | 13             | 126           | 0                              | 4         | 0                   | 8             | 159          | 167   | 705010            | 41909                                                         | 1379    | 55753                                         | 1863    |
| OBC          | 16                                                                                                                      | 7                 | 10               | 1                  | 0               | 0              | 13             | 149           | 0                              | 4         | 0                   | 12            | 189          | 201   | 1667690           | 82821                                                         | 2949    | 113110                                        | 3999    |
| others       | 13                                                                                                                      | 11                | 11               | 1                  | 0               | 1              | 12             | 171           | 0                              | 3         | 1                   | 6             | 217          | 223   | 1419382           | 63350                                                         | 2294    | 82035                                         | 3059    |
| all          | 14                                                                                                                      | 8                 | 10               | 1                  | 0               | 1              | 12             | 149           | 0                              | 4         | 0                   | 9             | 189          | 197   | 3986027           | 201253                                                        | 7179    | 268855                                        | 9695    |

Table (44): Average medical expenditure (Rs.) for treatment (other than as inpatient) under different heads per ailing person medically treated during last 15 days by mpce class

| all-India    |                                                                                                                         | Rural             |                  |                    |                 |                |                |               |                                |           |                     |               |              |       | Persons           |                                                               |         |                                               |         |
|--------------|-------------------------------------------------------------------------------------------------------------------------|-------------------|------------------|--------------------|-----------------|----------------|----------------|---------------|--------------------------------|-----------|---------------------|---------------|--------------|-------|-------------------|---------------------------------------------------------------|---------|-----------------------------------------------|---------|
| mpce class   | average medical expenditure (Rs.) for treatment under different heads for treatment other than as inpatient incurred on |                   |                  |                    |                 |                |                |               |                                |           |                     |               |              |       | estd. expn. (000) | persons treated medically on payment during last 15 days (00) |         | persons treated medically during last 15 days |         |
|              | services                                                                                                                |                   |                  |                    |                 |                | goods          |               |                                |           |                     | total (govt.) | total (pvt.) | total |                   | estd. (00)                                                    | sam-ple | estd. (00)                                    | sam-ple |
|              | doctor's/surgeons fee                                                                                                   |                   | diag-nostic test | atten-dant charges | physio the-rapy | other services | medicines      |               | perso-nal medi-cal applia-nces | food etc. | blood oxy-gen, etc. |               |              |       |                   |                                                               |         |                                               |         |
|              | hospi-tal staff                                                                                                         | other specia-list |                  |                    |                 |                | from hos-pital | from out-side |                                |           |                     |               |              |       |                   |                                                               |         |                                               |         |
| (1)          | (2)                                                                                                                     | (3)               | (4)              | (5)                | (6)             | (7)            | (8)            | (9)           | (10)                           | (11)      | (12)                | (13)          | (14)         | (15)  | (16)              | (17)                                                          | (18)    | (19)                                          | (20)    |
| 0 – 225      | 9                                                                                                                       | 5                 | 3                | 0                  | 0               | 0              | 5              | 84            | 0                              | 3         | 0                   | 5             | 104          | 109   | 155647            | 14238                                                         | 451     | 20738                                         | 662     |
| 225 – 255    | 8                                                                                                                       | 7                 | 10               | 2                  | 0               | 0              | 4              | 119           | 0                              | 12        | 0                   | 4             | 155          | 160   | 159989            | 9890                                                          | 310     | 14294                                         | 459     |
| 255 – 300    | 9                                                                                                                       | 5                 | 7                | 0                  | 0               | 0              | 4              | 116           | 0                              | 5         | 0                   | 11            | 135          | 146   | 366980            | 25113                                                         | 811     | 35625                                         | 1153    |
| 300 – 340    | 10                                                                                                                      | 6                 | 6                | 0                  | 0               | 0              | 6              | 110           | 0                              | 3         | 0                   | 7             | 135          | 142   | 320980            | 22632                                                         | 795     | 32117                                         | 1136    |
| 340 – 380    | 9                                                                                                                       | 10                | 6                | 0                  | 0               | 1              | 6              | 134           | 0                              | 4         | 1                   | 12            | 159          | 171   | 542091            | 31682                                                         | 1091    | 43933                                         | 1509    |
| 380 – 420    | 14                                                                                                                      | 5                 | 14               | 0                  | 0               | 3              | 10             | 135           | 0                              | 3         | 0                   | 13            | 170          | 183   | 651082            | 35444                                                         | 1271    | 47455                                         | 1683    |
| 420 – 470    | 13                                                                                                                      | 10                | 5                | 0                  | 0               | 1              | 14             | 133           | 1                              | 3         | 0                   | 7             | 172          | 179   | 724629            | 40235                                                         | 1430    | 54011                                         | 1906    |
| 470 – 525    | 13                                                                                                                      | 10                | 8                | 0                  | 0               | 1              | 19             | 155           | 2                              | 6         | 0                   | 13            | 201          | 214   | 948216            | 44322                                                         | 1564    | 57867                                         | 2100    |
| 525 – 615    | 15                                                                                                                      | 11                | 11               | 0                  | 0               | 0              | 20             | 144           | 0                              | 3         | 0                   | 5             | 201          | 205   | 872856            | 42358                                                         | 1629    | 55924                                         | 2193    |
| 615 – 775    | 15                                                                                                                      | 10                | 16               | 0                  | 0               | 0              | 18             | 158           | 1                              | 3         | 0                   | 4             | 215          | 219   | 1149537           | 52189                                                         | 2108    | 68901                                         | 2789    |
| 775 – 950    | 20                                                                                                                      | 9                 | 11               | 0                  | 0               | 1              | 12             | 176           | 0                              | 3         | 0                   | 7             | 225          | 232   | 705053            | 30305                                                         | 1097    | 40249                                         | 1501    |
| 950 +        | 18                                                                                                                      | 10                | 15               | 2                  | 1               | 1              | 20             | 224           | 2                              | 3         | 1                   | 9             | 287          | 296   | 1095128           | 36887                                                         | 1447    | 49471                                         | 1994    |
| all classes  | 14                                                                                                                      | 9                 | 10               | 0                  | 0               | 1              | 14             | 148           | 1                              | 4         | 0                   | 8             | 191          | 199   | 7692188           | 385296                                                        | 14004   | 520584                                        | 19085   |
| social group |                                                                                                                         |                   |                  |                    |                 |                |                |               |                                |           |                     |               |              |       |                   |                                                               |         |                                               |         |
| ST           | 8                                                                                                                       | 6                 | 7                | 0                  | 0               | 1              | 6              | 111           | 0                              | 5         | 0                   | 5             | 140          | 145   | 341419            | 23540                                                         | 1099    | 32111                                         | 1535    |
| SC           | 11                                                                                                                      | 7                 | 7                | 0                  | 0               | 1              | 14             | 124           | 0                              | 4         | 0                   | 7             | 160          | 167   | 1362305           | 81201                                                         | 2698    | 108358                                        | 3645    |
| OBC          | 16                                                                                                                      | 7                 | 10               | 0                  | 0               | 1              | 14             | 148           | 1                              | 4         | 0                   | 10            | 191          | 201   | 3181001           | 157776                                                        | 5699    | 217140                                        | 7847    |
| others       | 13                                                                                                                      | 13                | 12               | 1                  | 0               | 1              | 14             | 171           | 1                              | 3         | 1                   | 8             | 219          | 228   | 2802129           | 122689                                                        | 4505    | 162884                                        | 6055    |
| all          | 14                                                                                                                      | 9                 | 10               | 0                  | 0               | 1              | 14             | 148           | 1                              | 4         | 0                   | 8             | 191          | 199   | 7692188           | 385296                                                        | 14004   | 520584                                        | 19085   |

Table (44): Average medical expenditure (Rs.) for treatment (other than as inpatient) under different heads per ailing person medically treated during last 15 days by mpce class

| all-India    |                                                                                                                         | Urban             |                  |                   |                 |                |                |               |                                |           |                     |               | Males        |       |                   |                                                               |         |                                               |         |
|--------------|-------------------------------------------------------------------------------------------------------------------------|-------------------|------------------|-------------------|-----------------|----------------|----------------|---------------|--------------------------------|-----------|---------------------|---------------|--------------|-------|-------------------|---------------------------------------------------------------|---------|-----------------------------------------------|---------|
| mpce class   | average medical expenditure (Rs.) for treatment under different heads for treatment other than as inpatient incurred on |                   |                  |                   |                 |                |                |               |                                |           |                     |               |              |       | estd. expn. (000) | persons treated medically on payment during last 15 days (00) |         | persons treated medically during last 15 days |         |
|              | services                                                                                                                |                   |                  |                   |                 |                | goods          |               |                                |           |                     | total (govt.) | total (pvt.) | total |                   | estd. (00)                                                    | sam-ple | estd. (00)                                    | sam-ple |
|              | doctor's/ surgeons fee                                                                                                  |                   | diag-nostic test | attendant charges | physio the-rapy | other services | medicines      |               | perso-nal medi-cal applia-nces | food etc. | blood oxy-gen, etc. |               |              |       |                   |                                                               |         |                                               |         |
|              | hospi-tal staff                                                                                                         | other specia-list |                  |                   |                 |                | from hos-pital | from out-side |                                |           |                     |               |              |       |                   |                                                               |         |                                               |         |
| (1)          | (2)                                                                                                                     | (3)               | (4)              | (5)               | (6)             | (7)            | (8)            | (9)           | (10)                           | (11)      | (12)                | (13)          | (14)         | (15)  | (16)              | (17)                                                          | (18)    | (19)                                          | (20)    |
| 0-300        | 12                                                                                                                      | 10                | 3                | 0                 | 0               | 0              | 7              | 134           | 0                              | 2         | 0                   | 6             | 161          | 167   | 33433             | 1992                                                          | 95      | 2508                                          | 123     |
| 300-350      | 6                                                                                                                       | 20                | 0                | 0                 | 0               | 0              | 2              | 121           | 0                              | 0         | 0                   | 1             | 149          | 150   | 25197             | 1680                                                          | 78      | 2367                                          | 108     |
| 350-425      | 9                                                                                                                       | 9                 | 14               | 0                 | 0               | 0              | 4              | 111           | 0                              | 2         | 1                   | 4             | 146          | 150   | 62735             | 4178                                                          | 203     | 5573                                          | 283     |
| 425-500      | 10                                                                                                                      | 17                | 4                | 0                 | 0               | 0              | 14             | 136           | 0                              | 2         | 0                   | 4             | 179          | 183   | 133133            | 7257                                                          | 416     | 9920                                          | 587     |
| 500-575      | 12                                                                                                                      | 17                | 7                | 0                 | 0               | 1              | 11             | 149           | 0                              | 1         | 0                   | 4             | 194          | 197   | 76622             | 3886                                                          | 229     | 5258                                          | 311     |
| 575-665      | 11                                                                                                                      | 8                 | 3                | 0                 | 0               | 1              | 6              | 156           | 0                              | 4         | 0                   | 6             | 181          | 187   | 100269            | 5344                                                          | 321     | 7133                                          | 436     |
| 665-775      | 12                                                                                                                      | 10                | 7                | 0                 | 0               | 0              | 11             | 125           | 0                              | 1         | 0                   | 8             | 159          | 166   | 158034            | 9489                                                          | 475     | 12276                                         | 667     |
| 775-915      | 18                                                                                                                      | 14                | 10               | 0                 | 0               | 1              | 13             | 215           | 0                              | 1         | 0                   | 5             | 263          | 268   | 202409            | 7460                                                          | 477     | 10553                                         | 653     |
| 915-1120     | 17                                                                                                                      | 13                | 28               | 0                 | 0               | 0              | 17             | 166           | 0                              | 2         | 0                   | 3             | 239          | 242   | 255764            | 10498                                                         | 580     | 13803                                         | 762     |
| 1120-1500    | 23                                                                                                                      | 24                | 27               | 0                 | 2               | 0              | 6              | 262           | 0                              | 4         | 0                   | 2             | 347          | 349   | 458676            | 13129                                                         | 653     | 17495                                         | 883     |
| 1500-1925    | 14                                                                                                                      | 30                | 16               | 0                 | 3               | 0              | 14             | 198           | 0                              | 1         | 0                   | 5             | 270          | 275   | 91687             | 3338                                                          | 207     | 4646                                          | 299     |
| 1925+        | 40                                                                                                                      | 33                | 165              | 14                | 0               | 2              | 22             | 269           | 0                              | 1         | 0                   | 3             | 543          | 545   | 505502            | 9249                                                          | 417     | 12166                                         | 575     |
| all classes  | 18                                                                                                                      | 18                | 32               | 2                 | 1               | 1              | 12             | 187           | 0                              | 2         | 0                   | 4             | 267          | 271   | 2103462           | 77500                                                         | 4151    | 103700                                        | 5687    |
| social group |                                                                                                                         |                   |                  |                   |                 |                |                |               |                                |           |                     |               |              |       |                   |                                                               |         |                                               |         |
| ST           | 25                                                                                                                      | 8                 | 12               | 0                 | 1               | 0              | 8              | 150           | 0                              | 2         | 0                   | 13            | 194          | 207   | 22048             | 1063                                                          | 127     | 1677                                          | 192     |
| SC           | 14                                                                                                                      | 21                | 37               | 0                 | 0               | 0              | 18             | 135           | 0                              | 3         | 0                   | 3             | 223          | 226   | 223268            | 9805                                                          | 496     | 14048                                         | 738     |
| OBC          | 18                                                                                                                      | 13                | 12               | 1                 | 1               | 0              | 17             | 147           | 0                              | 2         | 0                   | 5             | 203          | 208   | 553033            | 26464                                                         | 1495    | 34504                                         | 1993    |
| others       | 19                                                                                                                      | 20                | 45               | 3                 | 1               | 1              | 7              | 226           | 0                              | 2         | 0                   | 4             | 321          | 325   | 1305113           | 40168                                                         | 2033    | 53465                                         | 2763    |
| all          | 18                                                                                                                      | 18                | 32               | 2                 | 1               | 1              | 12             | 187           | 0                              | 2         | 0                   | 4             | 267          | 271   | 2103462           | 77500                                                         | 4151    | 103700                                        | 5687    |

Table (44): Average medical expenditure (Rs.) for treatment (other than as inpatient) under different heads per ailing person medically treated during last 15 days by mpce class

| all-India    |                                                                                                                         | Urban             |                  |                    |                 |                |                |               |                                |           |                     |               | Females      |       |                   |                                                               |         |                                               |         |
|--------------|-------------------------------------------------------------------------------------------------------------------------|-------------------|------------------|--------------------|-----------------|----------------|----------------|---------------|--------------------------------|-----------|---------------------|---------------|--------------|-------|-------------------|---------------------------------------------------------------|---------|-----------------------------------------------|---------|
| mpce class   | average medical expenditure (Rs.) for treatment under different heads for treatment other than as inpatient incurred on |                   |                  |                    |                 |                |                |               |                                |           |                     |               |              |       | estd. expn. (000) | persons treated medically on payment during last 15 days (00) |         | persons treated medically during last 15 days |         |
|              | services                                                                                                                |                   |                  |                    |                 |                | goods          |               |                                |           |                     | total (govt.) | total (pvt.) | total |                   | estd. (00)                                                    | sam-ple | estd. (00)                                    | sam-ple |
|              | doctor's/ surgeons fee                                                                                                  |                   | diag-nostic test | atten-dant charges | physio the-rapy | other services | medicines      |               | perso-nal medi-cal applia-nces | food etc. | blood oxy-gen, etc. |               |              |       |                   |                                                               |         |                                               |         |
|              | hospi-tal staff                                                                                                         | other specia-list |                  |                    |                 |                | from hos-pital | from out-side |                                |           |                     |               |              |       |                   |                                                               |         |                                               |         |
| (1)          | (2)                                                                                                                     | (3)               | (4)              | (5)                | (6)             | (7)            | (8)            | (9)           | (10)                           | (11)      | (12)                | (13)          | (14)         | (15)  | (16)              | (17)                                                          | (18)    | (19)                                          | (20)    |
| 0-300        | 32                                                                                                                      | 24                | 4                | 0                  | 0               | 0              | 18             | 179           | 0                              | 29        | 0                   | 2             | 284          | 286   | 41540             | 1452                                                          | 78      | 1957                                          | 111     |
| 300-350      | 7                                                                                                                       | 9                 | 4                | 0                  | 0               | 0              | 2              | 104           | 0                              | 2         | 0                   | 4             | 124          | 128   | 23364             | 1824                                                          | 81      | 2554                                          | 118     |
| 350-425      | 12                                                                                                                      | 7                 | 6                | 0                  | 0               | 0              | 10             | 110           | 0                              | 1         | 0                   | 4             | 140          | 144   | 62005             | 4297                                                          | 219     | 5677                                          | 316     |
| 425-500      | 12                                                                                                                      | 9                 | 7                | 0                  | 0               | 1              | 23             | 115           | 0                              | 1         | 0                   | 1             | 166          | 168   | 143876            | 8575                                                          | 479     | 11153                                         | 629     |
| 500-575      | 12                                                                                                                      | 8                 | 13               | 1                  | 0               | 0              | 20             | 105           | 0                              | 3         | 0                   | 3             | 158          | 161   | 73298             | 4542                                                          | 259     | 5619                                          | 325     |
| 575-665      | 12                                                                                                                      | 16                | 12               | 1                  | 0               | 0              | 14             | 136           | 0                              | 5         | 0                   | 4             | 191          | 194   | 129799            | 6596                                                          | 373     | 8951                                          | 486     |
| 665-775      | 14                                                                                                                      | 11                | 21               | 0                  | 0               | 0              | 7              | 155           | 0                              | 3         | 0                   | 3             | 208          | 212   | 229030            | 10784                                                         | 567     | 13922                                         | 737     |
| 775-915      | 21                                                                                                                      | 11                | 13               | 2                  | 1               | 0              | 11             | 175           | 0                              | 1         | 0                   | 3             | 232          | 235   | 199357            | 8474                                                          | 554     | 11641                                         | 731     |
| 915-1120     | 21                                                                                                                      | 19                | 15               | 0                  | 1               | 1              | 10             | 201           | 1                              | 0         | 0                   | 3             | 265          | 268   | 294280            | 10955                                                         | 655     | 14504                                         | 849     |
| 1120-1500    | 19                                                                                                                      | 28                | 24               | 1                  | 0               | 1              | 8              | 282           | 0                              | 3         | 1                   | 3             | 365          | 368   | 468133            | 12690                                                         | 728     | 16574                                         | 982     |
| 1500-1925    | 22                                                                                                                      | 35                | 23               | 1                  | 2               | 0              | 13             | 199           | 2                              | 2         | 0                   | 3             | 296          | 299   | 118514            | 3952                                                          | 259     | 5394                                          | 337     |
| 1925+        | 25                                                                                                                      | 33                | 25               | 1                  | 3               | 0              | 8              | 271           | 0                              | 2         | 0                   | 3             | 364          | 367   | 392626            | 10687                                                         | 476     | 14347                                         | 649     |
| all classes  | 18                                                                                                                      | 19                | 16               | 1                  | 1               | 1              | 12             | 187           | 0                              | 3         | 0                   | 3             | 253          | 256   | 2175821           | 84829                                                         | 4728    | 112292                                        | 6270    |
| social group |                                                                                                                         |                   |                  |                    |                 |                |                |               |                                |           |                     |               |              |       |                   |                                                               |         |                                               |         |
| ST           | 11                                                                                                                      | 6                 | 8                | 0                  | 0               | 0              | 7              | 142           | 0                              | 0         | 0                   | 16            | 159          | 175   | 19792             | 1131                                                          | 161     | 1641                                          | 226     |
| SC           | 13                                                                                                                      | 15                | 16               | 0                  | 0               | 0              | 20             | 205           | 0                              | 1         | 0                   | 2             | 270          | 271   | 311329            | 11479                                                         | 565     | 14951                                         | 764     |
| OBC          | 20                                                                                                                      | 11                | 15               | 0                  | 0               | 0              | 15             | 146           | 0                              | 3         | 0                   | 2             | 209          | 211   | 577900            | 27354                                                         | 1660    | 36172                                         | 2152    |
| others       | 17                                                                                                                      | 24                | 18               | 1                  | 1               | 1              | 8              | 209           | 0                              | 3         | 0                   | 3             | 278          | 281   | 1266800           | 44864                                                         | 2342    | 59524                                         | 3127    |
| all          | 18                                                                                                                      | 19                | 16               | 1                  | 1               | 1              | 12             | 187           | 0                              | 3         | 0                   | 3             | 253          | 256   | 2175821           | 84829                                                         | 4728    | 112292                                        | 6270    |

Table (44): Average medical expenditure (Rs.) for treatment (other than as inpatient) under different heads per ailing person medically treated during last 15 days by mpce class

| all-India    |                                                                                                                         | Urban             |                  |                    |                 |                |                |               |                                |           |               |              | Persons |                   |                                                               |         |                                               |         |                     |
|--------------|-------------------------------------------------------------------------------------------------------------------------|-------------------|------------------|--------------------|-----------------|----------------|----------------|---------------|--------------------------------|-----------|---------------|--------------|---------|-------------------|---------------------------------------------------------------|---------|-----------------------------------------------|---------|---------------------|
| mpce class   | average medical expenditure (Rs.) for treatment under different heads for treatment other than as inpatient incurred on |                   |                  |                    |                 |                |                |               |                                |           |               |              |         | estd. expn. (000) | persons treated medically on payment during last 15 days (00) |         | persons treated medically during last 15 days |         |                     |
|              | services                                                                                                                |                   |                  |                    |                 |                | goods          |               |                                |           | total (govt.) | total (pvt.) | total   |                   | estd. (00)                                                    | sam-ple | estd. (00)                                    | sam-ple |                     |
|              | doctor's/surgeons fee                                                                                                   |                   | diag-nostic test | atten-dant charges | physio the-rapy | other services | medicines      |               | perso-nal medi-cal applia-nces | food etc. |               |              |         |                   |                                                               |         |                                               |         | blood oxy-gen, etc. |
|              | hospi-tal staff                                                                                                         | other specia-list |                  |                    |                 |                | from hos-pital | from out-side |                                |           |               |              |         |                   |                                                               |         |                                               |         |                     |
| (1)          | (2)                                                                                                                     | (3)               | (4)              | (5)                | (6)             | (7)            | (8)            | (9)           | (10)                           | (11)      | (12)          | (13)         | (14)    | (15)              | (16)                                                          | (17)    | (18)                                          | (19)    | (20)                |
| 0-300        | 20                                                                                                                      | 16                | 3                | 0                  | 0               | 0              | 12             | 153           | 0                              | 13        | 0             | 4            | 213     | 217               | 74973                                                         | 3444    | 173                                           | 4465    | 234                 |
| 300-350      | 6                                                                                                                       | 14                | 2                | 0                  | 0               | 0              | 2              | 112           | 0                              | 1         | 0             | 3            | 136     | 138               | 48561                                                         | 3504    | 159                                           | 4921    | 226                 |
| 350-425      | 10                                                                                                                      | 8                 | 10               | 0                  | 0               | 0              | 7              | 110           | 0                              | 1         | 0             | 4            | 143     | 147               | 124740                                                        | 8475    | 422                                           | 11251   | 599                 |
| 425-500      | 11                                                                                                                      | 13                | 6                | 0                  | 0               | 1              | 19             | 125           | 0                              | 1         | 0             | 3            | 172     | 175               | 277009                                                        | 15832   | 895                                           | 21073   | 1216                |
| 500-575      | 12                                                                                                                      | 12                | 10               | 0                  | 0               | 0              | 16             | 125           | 0                              | 2         | 0             | 3            | 175     | 178               | 149920                                                        | 8428    | 488                                           | 10877   | 636                 |
| 575-665      | 12                                                                                                                      | 12                | 8                | 0                  | 0               | 0              | 10             | 145           | 0                              | 4         | 0             | 5            | 186     | 191               | 230068                                                        | 11940   | 694                                           | 16084   | 922                 |
| 665-775      | 13                                                                                                                      | 11                | 14               | 0                  | 0               | 0              | 9              | 141           | 0                              | 2         | 0             | 5            | 185     | 190               | 387063                                                        | 20273   | 1042                                          | 26198   | 1404                |
| 775-915      | 19                                                                                                                      | 12                | 12               | 1                  | 0               | 1              | 12             | 194           | 0                              | 1         | 0             | 4            | 246     | 251               | 401766                                                        | 15934   | 1031                                          | 22194   | 1384                |
| 915-1120     | 19                                                                                                                      | 16                | 21               | 0                  | 0               | 1              | 13             | 184           | 0                              | 1         | 0             | 3            | 252     | 256               | 550044                                                        | 21453   | 1235                                          | 28308   | 1611                |
| 1120-1500    | 21                                                                                                                      | 26                | 25               | 1                  | 1               | 1              | 7              | 272           | 0                              | 4         | 1             | 3            | 356     | 358               | 926809                                                        | 25819   | 1381                                          | 34069   | 1865                |
| 1500-1925    | 18                                                                                                                      | 33                | 20               | 0                  | 2               | 0              | 13             | 199           | 1                              | 1         | 0             | 4            | 284     | 288               | 210202                                                        | 7290    | 466                                           | 10040   | 636                 |
| 1925+        | 32                                                                                                                      | 33                | 90               | 7                  | 2               | 1              | 15             | 270           | 0                              | 1         | 0             | 3            | 447     | 450               | 898128                                                        | 19936   | 893                                           | 26513   | 1224                |
| all classes  | 18                                                                                                                      | 18                | 24               | 1                  | 1               | 1              | 12             | 187           | 0                              | 2         | 0             | 4            | 259     | 263               | 4279283                                                       | 162328  | 8879                                          | 215992  | 11957               |
| social group |                                                                                                                         |                   |                  |                    |                 |                |                |               |                                |           |               |              |         |                   |                                                               |         |                                               |         |                     |
| ST           | 18                                                                                                                      | 7                 | 10               | 0                  | 0               | 0              | 7              | 146           | 0                              | 1         | 0             | 15           | 176     | 191               | 41840                                                         | 2194    | 288                                           | 3318    | 418                 |
| SC           | 13                                                                                                                      | 17                | 26               | 0                  | 0               | 0              | 19             | 173           | 0                              | 2         | 0             | 2            | 248     | 250               | 534597                                                        | 21284   | 1061                                          | 28999   | 1502                |
| OBC          | 19                                                                                                                      | 12                | 13               | 1                  | 0               | 0              | 16             | 146           | 0                              | 2         | 0             | 3            | 206     | 210               | 1130933                                                       | 53818   | 3155                                          | 70677   | 4145                |
| others       | 18                                                                                                                      | 22                | 31               | 2                  | 1               | 1              | 7              | 217           | 0                              | 2         | 0             | 4            | 298     | 302               | 2571914                                                       | 85033   | 4375                                          | 112988  | 5890                |
| all          | 18                                                                                                                      | 18                | 24               | 1                  | 1               | 1              | 12             | 187           | 0                              | 2         | 0             | 4            | 259     | 263               | 4279283                                                       | 162328  | 8879                                          | 215992  | 11957               |

Table (44): Average medical expenditure (Rs.) for treatment (other than as inpatient) under different heads per ailing person medically treated during last 15 days by mpce class

| all-India    |                                                                                                                         | Rural + Urban     |                  |                    |                 |                |                |               |                                |           |                     |               |              |       | Males             |                                                               |         |                                               |         |
|--------------|-------------------------------------------------------------------------------------------------------------------------|-------------------|------------------|--------------------|-----------------|----------------|----------------|---------------|--------------------------------|-----------|---------------------|---------------|--------------|-------|-------------------|---------------------------------------------------------------|---------|-----------------------------------------------|---------|
| mpce class   | average medical expenditure (Rs.) for treatment under different heads for treatment other than as inpatient incurred on |                   |                  |                    |                 |                |                |               |                                |           |                     |               |              |       | estd. expn. (000) | persons treated medically on payment during last 15 days (00) |         | persons treated medically during last 15 days |         |
|              | services                                                                                                                |                   |                  |                    |                 |                | goods          |               |                                |           |                     | total (govt.) | total (pvt.) | total |                   | estd. (00)                                                    | sam-ple | estd. (00)                                    | sam-ple |
|              | doctor's/ surgeons fee                                                                                                  |                   | diag-nostic test | atten-dant charges | physio the-rapy | other services | medicines      |               | perso-nal medi-cal applia-nces | food etc. | blood oxy-gen, etc. |               |              |       |                   |                                                               |         |                                               |         |
|              | hospi-tal staff                                                                                                         | other specia-list |                  |                    |                 |                | from hos-pital | from out-side |                                |           |                     |               |              |       |                   |                                                               |         |                                               |         |
| (1)          | (2)                                                                                                                     | (3)               | (4)              | (5)                | (6)             | (7)            | (8)            | (9)           | (10)                           | (11)      | (12)                | (13)          | (14)         | (15)  | (16)              | (17)                                                          | (18)    | (19)                                          | (20)    |
| 0 – 235      | 10                                                                                                                      | 5                 | 5                | 0                  | 0               | 0              | 7              | 98            | 0                              | 3         | 0                   | 5             | 122          | 128   | 116296            | 9068                                                          | 328     | 12587                                         | 457     |
| 235 – 265    | 5                                                                                                                       | 11                | 5                | 0                  | 0               | 0              | 2              | 110           | 0                              | 9         | 0                   | 3             | 137          | 139   | 99631             | 7015                                                          | 238     | 9830                                          | 338     |
| 265 – 320    | 8                                                                                                                       | 6                 | 10               | 0                  | 0               | 0              | 5              | 115           | 0                              | 5         | 0                   | 5             | 145          | 150   | 245012            | 16290                                                         | 605     | 23035                                         | 862     |
| 320 – 365    | 9                                                                                                                       | 9                 | 4                | 0                  | 0               | 0              | 10             | 114           | 0                              | 2         | 0                   | 5             | 143          | 148   | 271417            | 18361                                                         | 805     | 25944                                         | 1144    |
| 365 – 410    | 10                                                                                                                      | 14                | 5                | 1                  | 0               | 0              | 5              | 144           | 0                              | 3         | 2                   | 15            | 169          | 184   | 359719            | 19509                                                         | 746     | 26810                                         | 1036    |
| 410 – 460    | 11                                                                                                                      | 5                 | 6                | 0                  | 0               | 2              | 7              | 153           | 0                              | 4         | 0                   | 10            | 177          | 187   | 428277            | 22846                                                         | 948     | 30637                                         | 1284    |
| 460 – 520    | 15                                                                                                                      | 11                | 7                | 0                  | 0               | 1              | 16             | 137           | 1                              | 2         | 0                   | 8             | 182          | 190   | 529408            | 27751                                                         | 1174    | 37932                                         | 1616    |
| 520 – 605    | 13                                                                                                                      | 12                | 8                | 0                  | 0               | 1              | 21             | 167           | 3                              | 4         | 0                   | 12            | 217          | 229   | 647625            | 28155                                                         | 1245    | 38064                                         | 1697    |
| 605 – 730    | 17                                                                                                                      | 12                | 19               | 0                  | 0               | 0              | 21             | 148           | 0                              | 4         | 0                   | 4             | 215          | 220   | 695165            | 31519                                                         | 1398    | 41734                                         | 1871    |
| 730 – 980    | 19                                                                                                                      | 15                | 21               | 0                  | 1               | 0              | 13             | 194           | 0                              | 2         | 0                   | 3             | 261          | 265   | 1029735           | 38796                                                         | 1681    | 51662                                         | 2248    |
| 980 – 1285   | 18                                                                                                                      | 15                | 11               | 0                  | 1               | 1              | 16             | 163           | 0                              | 2         | 0                   | 4             | 223          | 227   | 377199            | 16600                                                         | 711     | 23127                                         | 1007    |
| 1285 +       | 25                                                                                                                      | 18                | 71               | 5                  | 0               | 2              | 26             | 243           | 2                              | 2         | 0                   | 4             | 389          | 394   | 1010140           | 25634                                                         | 1097    | 34067                                         | 1517    |
| all classes  | 15                                                                                                                      | 12                | 17               | 1                  | 0               | 1              | 14             | 159           | 1                              | 3         | 0                   | 7             | 215          | 222   | 5809623           | 261544                                                        | 10976   | 355429                                        | 15077   |
| social group |                                                                                                                         |                   |                  |                    |                 |                |                |               |                                |           |                     |               |              |       |                   |                                                               |         |                                               |         |
| ST           | 8                                                                                                                       | 7                 | 5                | 0                  | 0               | 0              | 8              | 117           | 0                              | 6         | 0                   | 5             | 147          | 152   | 174849            | 11519                                                         | 671     | 15921                                         | 955     |
| SC           | 11                                                                                                                      | 10                | 14               | 0                  | 0               | 1              | 16             | 124           | 0                              | 3         | 0                   | 5             | 174          | 179   | 880564            | 49097                                                         | 1815    | 66653                                         | 2520    |
| OBC          | 17                                                                                                                      | 8                 | 10               | 0                  | 0               | 1              | 16             | 147           | 1                              | 3         | 0                   | 7             | 196          | 203   | 2066344           | 101419                                                        | 4245    | 138534                                        | 5841    |
| others       | 15                                                                                                                      | 17                | 26               | 1                  | 0               | 1              | 12             | 193           | 1                              | 3         | 0                   | 8             | 261          | 270   | 2687860           | 99508                                                         | 4244    | 134313                                        | 5759    |
| all          | 15                                                                                                                      | 12                | 17               | 1                  | 0               | 1              | 14             | 159           | 1                              | 3         | 0                   | 7             | 215          | 222   | 5809623           | 261544                                                        | 10976   | 355429                                        | 15077   |

Table (44): Average medical expenditure (Rs.) for treatment (other than as inpatient) under different heads per ailing person medically treated during last 15 days by mpce class

| all-India    |                                                                                                                         | Rural + Urban     |                  |                    |                 |                |                |               |                                |           |                     |               |              |       | Females           |                                                               |         |                                               |         |
|--------------|-------------------------------------------------------------------------------------------------------------------------|-------------------|------------------|--------------------|-----------------|----------------|----------------|---------------|--------------------------------|-----------|---------------------|---------------|--------------|-------|-------------------|---------------------------------------------------------------|---------|-----------------------------------------------|---------|
| mpce class   | average medical expenditure (Rs.) for treatment under different heads for treatment other than as inpatient incurred on |                   |                  |                    |                 |                |                |               |                                |           |                     |               |              |       | estd. expn. (000) | persons treated medically on payment during last 15 days (00) |         | persons treated medically during last 15 days |         |
|              | services                                                                                                                |                   |                  |                    |                 |                | goods          |               |                                |           |                     | total (govt.) | total (pvt.) | total |                   | estd. (00)                                                    | sam-ple | estd. (00)                                    | sam-ple |
|              | doctor's/ surgeons fee                                                                                                  |                   | diag-nostic test | atten-dant charges | physio the-rapy | other services | medicines      |               | perso-nal medi-cal applia-nces | food etc. | blood oxy-gen, etc. |               |              |       |                   |                                                               |         |                                               |         |
|              | hospi-tal staff                                                                                                         | other specia-list |                  |                    |                 |                | from hos-pital | from out-side |                                |           |                     |               |              |       |                   |                                                               |         |                                               |         |
| (1)          | (2)                                                                                                                     | (3)               | (4)              | (5)                | (6)             | (7)            | (8)            | (9)           | (10)                           | (11)      | (12)                | (13)          | (14)         | (15)  | (16)              | (17)                                                          | (18)    | (19)                                          | (20)    |
| 0 – 235      | 12                                                                                                                      | 9                 | 2                | 0                  | 0               | 0              | 6              | 96            | 0                              | 7         | 0                   | 5             | 128          | 133   | 114325            | 8614                                                          | 296     | 12615                                         | 439     |
| 235 – 265    | 10                                                                                                                      | 6                 | 12               | 3                  | 0               | 0              | 5              | 126           | 0                              | 10        | 0                   | 5             | 165          | 170   | 108920            | 6380                                                          | 231     | 9384                                          | 347     |
| 265 – 320    | 10                                                                                                                      | 5                 | 5                | 0                  | 0               | 0              | 4              | 114           | 0                              | 4         | 0                   | 13            | 129          | 142   | 246708            | 17298                                                         | 628     | 23841                                         | 890     |
| 320 – 365    | 12                                                                                                                      | 8                 | 8                | 0                  | 0               | 1              | 13             | 118           | 0                              | 3         | 0                   | 5             | 158          | 162   | 326571            | 20103                                                         | 885     | 27246                                         | 1208    |
| 365 – 410    | 9                                                                                                                       | 8                 | 8                | 0                  | 0               | 1              | 10             | 121           | 0                              | 4         | 0                   | 6             | 156          | 161   | 332292            | 20600                                                         | 833     | 27999                                         | 1109    |
| 410 – 460    | 15                                                                                                                      | 8                 | 19               | 0                  | 0               | 2              | 12             | 124           | 0                              | 4         | 0                   | 12            | 172          | 184   | 452874            | 24539                                                         | 1017    | 32902                                         | 1321    |
| 460 – 520    | 11                                                                                                                      | 10                | 9                | 0                  | 0               | 0              | 10             | 135           | 0                              | 2         | 0                   | 5             | 172          | 177   | 582284            | 32757                                                         | 1298    | 42277                                         | 1694    |
| 520 – 605    | 16                                                                                                                      | 9                 | 9                | 1                  | 0               | 0              | 14             | 164           | 0                              | 4         | 1                   | 9             | 209          | 218   | 702357            | 32101                                                         | 1350    | 41997                                         | 1787    |
| 605 – 730    | 16                                                                                                                      | 15                | 11               | 0                  | 0               | 1              | 15             | 166           | 0                              | 1         | 0                   | 4             | 221          | 225   | 727734            | 32292                                                         | 1466    | 42498                                         | 1933    |
| 730 – 980    | 16                                                                                                                      | 15                | 17               | 1                  | 0               | 1              | 16             | 197           | 1                              | 3         | 1                   | 4             | 262          | 266   | 1046611           | 39212                                                         | 1808    | 51308                                         | 2406    |
| 980 – 1285   | 20                                                                                                                      | 13                | 14               | 0                  | 0               | 0              | 10             | 194           | 0                              | 3         | 0                   | 8             | 247          | 255   | 538056            | 20996                                                         | 852     | 27162                                         | 1130    |
| 1285 +       | 20                                                                                                                      | 18                | 17               | 2                  | 2               | 1              | 12             | 238           | 0                              | 3         | 1                   | 9             | 305          | 314   | 983117            | 31189                                                         | 1243    | 41917                                         | 1701    |
| all classes  | 15                                                                                                                      | 11                | 12               | 1                  | 0               | 1              | 12             | 160           | 0                              | 3         | 0                   | 7             | 208          | 215   | 6161848           | 286081                                                        | 11907   | 381147                                        | 15965   |
| social group |                                                                                                                         |                   |                  |                    |                 |                |                |               |                                |           |                     |               |              |       |                   |                                                               |         |                                               |         |
| ST           | 10                                                                                                                      | 6                 | 9                | 0                  | 0               | 1              | 5              | 111           | 0                              | 4         | 0                   | 6             | 141          | 147   | 208410            | 14214                                                         | 716     | 19508                                         | 998     |
| SC           | 11                                                                                                                      | 9                 | 9                | 0                  | 0               | 0              | 14             | 143           | 0                              | 3         | 0                   | 7             | 183          | 189   | 1016339           | 53387                                                         | 1944    | 70704                                         | 2627    |
| OBC          | 17                                                                                                                      | 8                 | 11               | 1                  | 0               | 0              | 14             | 148           | 0                              | 4         | 0                   | 9             | 194          | 203   | 2245589           | 110175                                                        | 4609    | 149282                                        | 6151    |
| others       | 15                                                                                                                      | 17                | 14               | 1                  | 1               | 1              | 10             | 187           | 0                              | 3         | 0                   | 5             | 242          | 247   | 2686182           | 108214                                                        | 4636    | 141559                                        | 6186    |
| all          | 15                                                                                                                      | 11                | 12               | 1                  | 0               | 1              | 12             | 160           | 0                              | 3         | 0                   | 7             | 208          | 215   | 6161848           | 286081                                                        | 11907   | 381147                                        | 15965   |



Table (44): Average medical expenditure (Rs.) for treatment (other than as inpatient) under different heads per ailing person medically treated during last 15 days by mpce class

| all-India    |                                                                                                                         | Rural + Urban     |                  |                    |                 |                |                |               |                                |           |                     |               |              |       | Persons           |                                                               |         |                                               |         |
|--------------|-------------------------------------------------------------------------------------------------------------------------|-------------------|------------------|--------------------|-----------------|----------------|----------------|---------------|--------------------------------|-----------|---------------------|---------------|--------------|-------|-------------------|---------------------------------------------------------------|---------|-----------------------------------------------|---------|
| mpce class   | average medical expenditure (Rs.) for treatment under different heads for treatment other than as inpatient incurred on |                   |                  |                    |                 |                |                |               |                                |           |                     |               |              |       | estd. expn. (000) | persons treated medically on payment during last 15 days (00) |         | persons treated medically during last 15 days |         |
|              | services                                                                                                                |                   |                  |                    |                 |                | goods          |               |                                |           |                     | total (govt.) | total (pvt.) | total |                   | estd. (00)                                                    | sam-ple | estd. (00)                                    | sam-ple |
|              | doctor's/surgeons fee                                                                                                   |                   | diag-nostic test | atten-dant charges | physio the-rapy | other services | medicines      |               | perso-nal medi-cal applia-nces | food etc. | blood oxy-gen, etc. |               |              |       |                   |                                                               |         |                                               |         |
|              | hospi-tal staff                                                                                                         | other specia-list |                  |                    |                 |                | from hos-pital | from out-side |                                |           |                     |               |              |       |                   |                                                               |         |                                               |         |
| (1)          | (2)                                                                                                                     | (3)               | (4)              | (5)                | (6)             | (7)            | (8)            | (9)           | (10)                           | (11)      | (12)                | (13)          | (14)         | (15)  | (16)              | (17)                                                          | (18)    | (19)                                          | (20)    |
| 0 – 235      | 11                                                                                                                      | 7                 | 3                | 0                  | 0               | 0              | 7              | 97            | 0                              | 5         | 0                   | 5             | 125          | 130   | 230620            | 17682                                                         | 624     | 25203                                         | 896     |
| 235 – 265    | 7                                                                                                                       | 8                 | 8                | 1                  | 0               | 0              | 3              | 117           | 0                              | 9         | 0                   | 4             | 150          | 154   | 208551            | 13394                                                         | 469     | 19214                                         | 685     |
| 265 – 320    | 10                                                                                                                      | 6                 | 7                | 0                  | 0               | 0              | 5              | 115           | 0                              | 4         | 0                   | 9             | 137          | 146   | 491720            | 33588                                                         | 1233    | 46876                                         | 1752    |
| 320 – 365    | 11                                                                                                                      | 9                 | 6                | 0                  | 0               | 0              | 11             | 116           | 0                              | 2         | 0                   | 5             | 150          | 155   | 597989            | 38464                                                         | 1690    | 53190                                         | 2352    |
| 365 – 410    | 10                                                                                                                      | 11                | 7                | 0                  | 0               | 1              | 8              | 132           | 0                              | 4         | 1                   | 10            | 162          | 173   | 692011            | 40109                                                         | 1579    | 54810                                         | 2145    |
| 410 – 460    | 13                                                                                                                      | 7                 | 13               | 0                  | 0               | 2              | 10             | 138           | 0                              | 4         | 0                   | 11            | 174          | 185   | 881151            | 47385                                                         | 1965    | 63539                                         | 2605    |
| 460 – 520    | 13                                                                                                                      | 10                | 8                | 0                  | 0               | 1              | 13             | 136           | 1                              | 2         | 0                   | 6             | 176          | 183   | 1111692           | 60508                                                         | 2472    | 80209                                         | 3310    |
| 520 – 605    | 15                                                                                                                      | 10                | 9                | 0                  | 0               | 1              | 17             | 165           | 1                              | 4         | 0                   | 11            | 213          | 223   | 1349982           | 60256                                                         | 2595    | 80061                                         | 3484    |
| 605 – 730    | 16                                                                                                                      | 13                | 15               | 0                  | 0               | 1              | 18             | 157           | 0                              | 3         | 0                   | 4             | 218          | 222   | 1422899           | 63811                                                         | 2864    | 84232                                         | 3804    |
| 730 – 980    | 17                                                                                                                      | 15                | 19               | 1                  | 0               | 0              | 14             | 195           | 1                              | 3         | 0                   | 4             | 262          | 265   | 2076346           | 78008                                                         | 3489    | 102970                                        | 4654    |
| 980 – 1285   | 19                                                                                                                      | 14                | 13               | 0                  | 1               | 1              | 13             | 181           | 0                              | 2         | 0                   | 7             | 236          | 243   | 915254            | 37596                                                         | 1563    | 50289                                         | 2137    |
| 1285 +       | 23                                                                                                                      | 18                | 41               | 3                  | 1               | 1              | 18             | 240           | 1                              | 3         | 1                   | 7             | 343          | 350   | 1993256           | 56823                                                         | 2340    | 75984                                         | 3218    |
| all classes  | 15                                                                                                                      | 12                | 14               | 1                  | 0               | 1              | 13             | 159           | 0                              | 3         | 0                   | 7             | 211          | 218   | 11971471          | 547625                                                        | 22883   | 736576                                        | 31042   |
| social group |                                                                                                                         |                   |                  |                    |                 |                |                |               |                                |           |                     |               |              |       |                   |                                                               |         |                                               |         |
| ST           | 9                                                                                                                       | 6                 | 7                | 0                  | 0               | 1              | 6              | 114           | 0                              | 5         | 0                   | 5             | 143          | 149   | 383259            | 25734                                                         | 1387    | 35429                                         | 1953    |
| SC           | 11                                                                                                                      | 9                 | 11               | 0                  | 0               | 0              | 15             | 134           | 0                              | 3         | 0                   | 6             | 178          | 184   | 1896902           | 102484                                                        | 3759    | 137358                                        | 5147    |
| OBC          | 17                                                                                                                      | 8                 | 11               | 0                  | 0               | 1              | 15             | 147           | 1                              | 4         | 0                   | 8             | 195          | 203   | 4311934           | 211594                                                        | 8854    | 287816                                        | 11992   |
| others       | 15                                                                                                                      | 17                | 20               | 1                  | 1               | 1              | 11             | 190           | 1                              | 3         | 0                   | 7             | 252          | 258   | 5374042           | 207722                                                        | 8880    | 275872                                        | 11945   |
| all          | 15                                                                                                                      | 12                | 14               | 1                  | 0               | 1              | 13             | 159           | 0                              | 3         | 0                   | 7             | 211          | 218   | 11971471          | 547625                                                        | 22883   | 736576                                        | 31042   |

1 Table (45): Average total expenditure incurred during the last 15 days on account of treatment per ailing person (but not  
 2 as inpatient of a hospital) for each sex and mpce class  
 3

| 4 all-India<br>5 mpce class | 6 Rural                                                                                                                                           |                                         |                                                                   |                            | 7 Males                                                                                             |                                                                           |           |                                                              |           |
|-----------------------------|---------------------------------------------------------------------------------------------------------------------------------------------------|-----------------------------------------|-------------------------------------------------------------------|----------------------------|-----------------------------------------------------------------------------------------------------|---------------------------------------------------------------------------|-----------|--------------------------------------------------------------|-----------|
|                             | 8 average total expenditure (Rs) per treated person<br>9 during the last 15 days on account of ailment (but not<br>10 as inpatient of a hospital) |                                         |                                                                   |                            | 11 average loss<br>12 of hhs.<br>13 income due<br>14 to ailment<br>15 (Rs.) per<br>16 ailing person | 17 persons reporting<br>18 treatment of ailment<br>19 during last 15 days |           | 20 persons reporting<br>21 ailment during last 15<br>22 days |           |
|                             | 23 medical<br>24 treatment<br>25 (Govt.)                                                                                                          | 26 medical<br>27 treatment<br>28 (Pvt.) | 29 other<br>30 expenses<br>31 incurred<br>32 due to<br>33 ailment | 34 total<br>35 expenditure |                                                                                                     | 36 estd. no.<br>37 (00)                                                   | 38 sample | 39 estd. no.<br>40 (00)                                      | 41 sample |
| 42 (1)                      | 43 (2)                                                                                                                                            | 44 (3)                                  | 45 (4)                                                            | 46 (5)                     | 47 (6)                                                                                              | 48 (7)                                                                    | 49 (8)    | 50 (9)                                                       | 51 (10)   |
| 52 0 – 225                  | 53 9                                                                                                                                              | 54 194                                  | 55 26                                                             | 56 229                     | 57 1245                                                                                             | 58 9858                                                                   | 59 316    | 60 10079                                                     | 61 334    |
| 62 225 – 255                | 63 9                                                                                                                                              | 64 193                                  | 65 15                                                             | 66 218                     | 67 183                                                                                              | 68 7176                                                                   | 69 219    | 70 7463                                                      | 71 230    |
| 72 255 – 300                | 73 11                                                                                                                                             | 74 201                                  | 75 22                                                             | 76 234                     | 77 128                                                                                              | 78 16524                                                                  | 79 550    | 80 17461                                                     | 81 579    |
| 82 300 – 340                | 83 31                                                                                                                                             | 84 168                                  | 85 34                                                             | 86 234                     | 87 102                                                                                              | 88 15538                                                                  | 89 535    | 90 16024                                                     | 91 557    |
| 92 340 – 380                | 93 17                                                                                                                                             | 94 190                                  | 95 24                                                             | 96 231                     | 97 140                                                                                              | 98 20324                                                                  | 99 694    | 100 21552                                                    | 101 725   |
| 102 380 – 420               | 103 15                                                                                                                                            | 104 204                                 | 105 24                                                            | 106 243                    | 107 132                                                                                             | 108 22850                                                                 | 109 819   | 110 23503                                                    | 111 848   |
| 112 420 – 470               | 113 11                                                                                                                                            | 114 237                                 | 115 27                                                            | 116 275                    | 117 241                                                                                             | 118 24790                                                                 | 119 910   | 120 25656                                                    | 121 949   |
| 122 470 – 525               | 123 16                                                                                                                                            | 124 391                                 | 125 28                                                            | 126 435                    | 127 280                                                                                             | 128 26664                                                                 | 129 1001  | 130 27510                                                    | 131 1044  |
| 132 525 – 615               | 133 9                                                                                                                                             | 134 239                                 | 135 27                                                            | 136 275                    | 137 175                                                                                             | 138 27029                                                                 | 139 1062  | 140 27930                                                    | 141 1109  |
| 142 615 – 775               | 143 4                                                                                                                                             | 144 274                                 | 145 29                                                            | 146 308                    | 147 135                                                                                             | 148 33159                                                                 | 149 1316  | 150 34167                                                    | 151 1365  |
| 152 775 – 950               | 153 13                                                                                                                                            | 154 291                                 | 155 39                                                            | 156 343                    | 157 148                                                                                             | 158 17310                                                                 | 159 677   | 160 18481                                                    | 161 708   |
| 162 950 +                   | 163 8                                                                                                                                             | 164 434                                 | 165 39                                                            | 166 482                    | 167 128                                                                                             | 168 20917                                                                 | 169 896   | 170 21901                                                    | 171 942   |
| 172 all                     | 173 12                                                                                                                                            | 174 263                                 | 175 28                                                            | 176 304                    | 177 211                                                                                             | 178 242140                                                                | 179 8995  | 180 251729                                                   | 181 9390  |

18 Table (45): Average total expenditure incurred during the last 15 days on account of treatment per ailing person (but not  
 19 as inpatient of a hospital) for each sex and mpce class  
 20

| 21 all-India<br>22 mpce class | 23 Rural                                                                                                                                            |                                         |                                                                   |                            | 24 Females                                                                                          |                                                                           |           |                                                              |           |
|-------------------------------|-----------------------------------------------------------------------------------------------------------------------------------------------------|-----------------------------------------|-------------------------------------------------------------------|----------------------------|-----------------------------------------------------------------------------------------------------|---------------------------------------------------------------------------|-----------|--------------------------------------------------------------|-----------|
|                               | 25 average total expenditure (Rs) per treated person<br>26 during the last 15 days on account of ailment (but not<br>27 as inpatient of a hospital) |                                         |                                                                   |                            | 28 average loss<br>29 of hhs.<br>30 income due<br>31 to ailment<br>32 (Rs.) per<br>33 ailing person | 34 persons reporting<br>35 treatment of ailment<br>36 during last 15 days |           | 37 persons reporting<br>38 ailment during last 15<br>39 days |           |
|                               | 40 medical<br>41 treatment<br>42 (Govt.)                                                                                                            | 43 medical<br>44 treatment<br>45 (Pvt.) | 46 other<br>47 expenses<br>48 incurred<br>49 due to<br>50 ailment | 51 total<br>52 expenditure |                                                                                                     | 53 estd. no.<br>54 (00)                                                   | 55 sample | 56 estd. no.<br>57 (00)                                      | 58 sample |
| 59 (1)                        | 60 (2)                                                                                                                                              | 61 (3)                                  | 62 (4)                                                            | 63 (5)                     | 64 (6)                                                                                              | 65 (7)                                                                    | 66 (8)    | 67 (9)                                                       | 68 (10)   |
| 69 0 – 225                    | 70 9                                                                                                                                                | 71 132                                  | 72 13                                                             | 73 154                     | 74 46                                                                                               | 75 10174                                                                  | 76 306    | 77 10659                                                     | 78 328    |
| 79 225 – 255                  | 80 7                                                                                                                                                | 81 234                                  | 82 22                                                             | 83 262                     | 84 53                                                                                               | 85 6173                                                                   | 86 210    | 87 6830                                                      | 88 229    |
| 89 255 – 300                  | 90 19                                                                                                                                               | 91 149                                  | 92 21                                                             | 93 189                     | 94 63                                                                                               | 95 17747                                                                  | 96 550    | 97 18164                                                     | 98 574    |
| 99 300 – 340                  | 100 7                                                                                                                                               | 101 213                                 | 102 21                                                            | 103 240                    | 104 58                                                                                              | 105 15483                                                                 | 106 556   | 107 16093                                                    | 108 579   |
| 109 340 – 380                 | 110 7                                                                                                                                               | 111 198                                 | 112 23                                                            | 113 228                    | 114 67                                                                                              | 115 21410                                                                 | 116 754   | 117 22381                                                    | 118 784   |
| 119 380 – 420                 | 120 23                                                                                                                                              | 121 201                                 | 122 32                                                            | 123 256                    | 124 60                                                                                              | 125 23311                                                                 | 126 806   | 127 23951                                                    | 128 835   |
| 129 420 – 470                 | 130 8                                                                                                                                               | 131 188                                 | 132 18                                                            | 133 214                    | 134 78                                                                                              | 135 27523                                                                 | 136 916   | 137 28355                                                    | 138 957   |
| 139 470 – 525                 | 140 11                                                                                                                                              | 141 247                                 | 142 30                                                            | 143 288                    | 144 62                                                                                              | 145 29044                                                                 | 146 1011  | 147 30357                                                    | 148 1056  |
| 149 525 – 615                 | 150 5                                                                                                                                               | 151 244                                 | 152 29                                                            | 153 277                    | 154 79                                                                                              | 155 26837                                                                 | 156 1034  | 157 27994                                                    | 158 1084  |
| 159 615 – 775                 | 160 4                                                                                                                                               | 161 251                                 | 162 30                                                            | 163 286                    | 164 61                                                                                              | 165 33636                                                                 | 166 1373  | 167 34734                                                    | 168 1424  |
| 169 775 – 950                 | 170 9                                                                                                                                               | 171 270                                 | 172 27                                                            | 173 306                    | 174 56                                                                                              | 175 20753                                                                 | 176 756   | 177 21768                                                    | 178 793   |
| 179 950 +                     | 180 15                                                                                                                                              | 181 333                                 | 182 35                                                            | 183 383                    | 184 65                                                                                              | 185 26851                                                                 | 186 1002  | 187 27570                                                    | 188 1052  |
| 189 all                       | 190 10                                                                                                                                              | 191 230                                 | 192 27                                                            | 193 267                    | 194 64                                                                                              | 195 258940                                                                | 196 9274  | 197 268855                                                   | 198 9695  |

1 Table (45): Average total expenditure incurred during the last 15 days on account of treatment per ailing person (but not  
 2 as inpatient of a hospital) for each sex and mpce class  
 3

| all-India  |                                                                                                                                      | Rural                    |                                        |                   |                                                                    | Persons                                                    |        |                                               |        |
|------------|--------------------------------------------------------------------------------------------------------------------------------------|--------------------------|----------------------------------------|-------------------|--------------------------------------------------------------------|------------------------------------------------------------|--------|-----------------------------------------------|--------|
| mpce class | average total expenditure (Rs) per treated person during the last 15 days on account of ailment (but not as inpatient of a hospital) |                          |                                        |                   | average loss of hhs. income due to ailment (Rs.) per ailing person | persons reporting treatment of ailment during last 15 days |        | persons reporting ailment during last 15 days |        |
|            | medical treatment (Govt.)                                                                                                            | medical treatment (Pvt.) | other expenses incurred due to ailment | total expenditure |                                                                    | estd. no. (00)                                             | sample | estd. no. (00)                                | sample |
| (1)        | (2)                                                                                                                                  | (3)                      | (4)                                    | (5)               | (6)                                                                | (7)                                                        | (8)    | (9)                                           | (10)   |
| 0 – 225    | 9                                                                                                                                    | 163                      | 19                                     | 191               | 636                                                                | 20032                                                      | 622    | 20738                                         | 662    |
| 225 – 255  | 8                                                                                                                                    | 212                      | 18                                     | 238               | 123                                                                | 13349                                                      | 429    | 14294                                         | 459    |
| 255 – 300  | 15                                                                                                                                   | 174                      | 21                                     | 210               | 94                                                                 | 34271                                                      | 1100   | 35625                                         | 1153   |
| 300 – 340  | 19                                                                                                                                   | 190                      | 27                                     | 237               | 80                                                                 | 31021                                                      | 1091   | 32117                                         | 1136   |
| 340 – 380  | 12                                                                                                                                   | 194                      | 24                                     | 229               | 102                                                                | 41734                                                      | 1448   | 43933                                         | 1509   |
| 380 – 420  | 19                                                                                                                                   | 202                      | 28                                     | 250               | 96                                                                 | 46160                                                      | 1625   | 47455                                         | 1683   |
| 420 – 470  | 9                                                                                                                                    | 211                      | 22                                     | 243               | 155                                                                | 52314                                                      | 1826   | 54011                                         | 1906   |
| 470 – 525  | 13                                                                                                                                   | 316                      | 29                                     | 358               | 166                                                                | 55708                                                      | 2012   | 57867                                         | 2100   |
| 525 – 615  | 7                                                                                                                                    | 241                      | 28                                     | 276               | 127                                                                | 53866                                                      | 2096   | 55924                                         | 2193   |
| 615 – 775  | 4                                                                                                                                    | 263                      | 30                                     | 297               | 98                                                                 | 66795                                                      | 2689   | 68901                                         | 2789   |
| 775 – 950  | 11                                                                                                                                   | 280                      | 32                                     | 323               | 98                                                                 | 38063                                                      | 1433   | 40249                                         | 1501   |
| 950 +      | 12                                                                                                                                   | 377                      | 37                                     | 426               | 93                                                                 | 47768                                                      | 1898   | 49471                                         | 1994   |
| all        | 11                                                                                                                                   | 246                      | 27                                     | 285               | 135                                                                | 501080                                                     | 18269  | 520584                                        | 19085  |

30 Table (45): Average total expenditure incurred during the last 15 days on account of treatment per ailing person (but not  
 31 as inpatient of a hospital) for each sex and mpce class  
 32

| all-India   |                                                                                                                                      | Urban                    |                                        |                   |                                                                    | Males                                                      |        |                                               |        |
|-------------|--------------------------------------------------------------------------------------------------------------------------------------|--------------------------|----------------------------------------|-------------------|--------------------------------------------------------------------|------------------------------------------------------------|--------|-----------------------------------------------|--------|
| mpce class  | average total expenditure (Rs) per treated person during the last 15 days on account of ailment (but not as inpatient of a hospital) |                          |                                        |                   | average loss of hhs. income due to ailment (Rs.) per ailing person | persons reporting treatment of ailment during last 15 days |        | persons reporting ailment during last 15 days |        |
|             | medical treatment (Govt.)                                                                                                            | medical treatment (Pvt.) | other expenses incurred due to ailment | total expenditure |                                                                    | estd. no. (00)                                             | sample | estd. no. (00)                                | sample |
| (1)         | (2)                                                                                                                                  | (3)                      | (4)                                    | (5)               | (6)                                                                | (7)                                                        | (8)    | (9)                                           | (10)   |
| 0 – 300     | 5                                                                                                                                    | 174                      | 35                                     | 214               | 416                                                                | 2466                                                       | 120    | 2508                                          | 123    |
| 300 – 350   | 1                                                                                                                                    | 324                      | 8                                      | 333               | 171                                                                | 2359                                                       | 107    | 2367                                          | 108    |
| 350 – 425   | 4                                                                                                                                    | 206                      | 7                                      | 217               | 340                                                                | 5363                                                       | 274    | 5573                                          | 283    |
| 425 – 500   | 5                                                                                                                                    | 213                      | 15                                     | 234               | 151                                                                | 9453                                                       | 552    | 9920                                          | 587    |
| 500 – 575   | 16                                                                                                                                   | 238                      | 17                                     | 271               | 161                                                                | 5098                                                       | 296    | 5258                                          | 311    |
| 575 – 665   | 9                                                                                                                                    | 269                      | 14                                     | 292               | 98                                                                 | 6877                                                       | 410    | 7133                                          | 436    |
| 665 – 775   | 8                                                                                                                                    | 224                      | 19                                     | 252               | 135                                                                | 11763                                                      | 613    | 12276                                         | 667    |
| 775 – 915   | 7                                                                                                                                    | 311                      | 16                                     | 334               | 92                                                                 | 9686                                                       | 599    | 10553                                         | 653    |
| 915 – 1120  | 3                                                                                                                                    | 252                      | 16                                     | 270               | 93                                                                 | 12918                                                      | 714    | 13803                                         | 762    |
| 1120 – 1500 | 4                                                                                                                                    | 402                      | 23                                     | 430               | 202                                                                | 16286                                                      | 812    | 17495                                         | 883    |
| 1500 – 1925 | 5                                                                                                                                    | 317                      | 15                                     | 337               | 125                                                                | 4217                                                       | 265    | 4646                                          | 299    |
| 1925 +      | 6                                                                                                                                    | 608                      | 47                                     | 662               | 200                                                                | 10808                                                      | 508    | 12166                                         | 575    |
| all         | 6                                                                                                                                    | 316                      | 21                                     | 343               | 163                                                                | 97294                                                      | 5270   | 103700                                        | 5687   |

Table (45): Average total expenditure incurred during the last 15 days on account of treatment per ailing person (but not as inpatient of a hospital) for each sex and mpce class

| mpce class | Urban                                                                                                                                |                          |                                        |                   | Females                                                            |                                                            |        |                                               |        |
|------------|--------------------------------------------------------------------------------------------------------------------------------------|--------------------------|----------------------------------------|-------------------|--------------------------------------------------------------------|------------------------------------------------------------|--------|-----------------------------------------------|--------|
|            | average total expenditure (Rs) per treated person during the last 15 days on account of ailment (but not as inpatient of a hospital) |                          |                                        |                   | average loss of hhs. income due to ailment (Rs.) per ailing person | persons reporting treatment of ailment during last 15 days |        | persons reporting ailment during last 15 days |        |
|            | medical treatment (Govt.)                                                                                                            | medical treatment (Pvt.) | other expenses incurred due to ailment | total expenditure |                                                                    | estd. no. (00)                                             | sample | estd. no. (00)                                | sample |
| (1)        | (2)                                                                                                                                  | (3)                      | (4)                                    | (5)               | (6)                                                                | (7)                                                        | (8)    | (9)                                           | (10)   |
| 0-300      | 2                                                                                                                                    | 242                      | 11                                     | 254               | 51                                                                 | 1867                                                       | 102    | 1957                                          | 111    |
| 300-350    | 4                                                                                                                                    | 172                      | 12                                     | 188               | 27                                                                 | 2500                                                       | 110    | 2554                                          | 118    |
| 350-425    | 6                                                                                                                                    | 165                      | 10                                     | 180               | 40                                                                 | 5338                                                       | 292    | 5677                                          | 316    |
| 425-500    | 5                                                                                                                                    | 260                      | 15                                     | 281               | 38                                                                 | 10737                                                      | 599    | 11153                                         | 629    |
| 500-575    | 3                                                                                                                                    | 190                      | 11                                     | 204               | 35                                                                 | 5528                                                       | 314    | 5619                                          | 325    |
| 575-665    | 7                                                                                                                                    | 223                      | 26                                     | 255               | 51                                                                 | 8160                                                       | 454    | 8951                                          | 486    |
| 665-775    | 7                                                                                                                                    | 226                      | 20                                     | 253               | 21                                                                 | 13205                                                      | 702    | 13922                                         | 737    |
| 775-915    | 3                                                                                                                                    | 252                      | 21                                     | 276               | 51                                                                 | 10580                                                      | 671    | 11641                                         | 731    |
| 915-1120   | 3                                                                                                                                    | 286                      | 19                                     | 308               | 42                                                                 | 13712                                                      | 796    | 14504                                         | 849    |
| 1120-1500  | 4                                                                                                                                    | 375                      | 28                                     | 406               | 18                                                                 | 15580                                                      | 898    | 16574                                         | 982    |
| 1500-1925  | 3                                                                                                                                    | 384                      | 15                                     | 402               | 20                                                                 | 4552                                                       | 305    | 5394                                          | 337    |
| 1925+      | 27                                                                                                                                   | 400                      | 24                                     | 451               | 22                                                                 | 12696                                                      | 580    | 14347                                         | 649    |
| all        | 7                                                                                                                                    | 284                      | 20                                     | 311               | 33                                                                 | 104457                                                     | 5823   | 112292                                        | 6270   |

Table (45): Average total expenditure incurred during the last 15 days on account of treatment per ailing person (but not as inpatient of a hospital) for each sex and mpce class

| mpce class | Urban                                                                                                                                |                          |                                        |                   | Persons                                                            |                                                            |        |                                               |        |
|------------|--------------------------------------------------------------------------------------------------------------------------------------|--------------------------|----------------------------------------|-------------------|--------------------------------------------------------------------|------------------------------------------------------------|--------|-----------------------------------------------|--------|
|            | average total expenditure (Rs) per treated person during the last 15 days on account of ailment (but not as inpatient of a hospital) |                          |                                        |                   | average loss of hhs. income due to ailment (Rs.) per ailing person | persons reporting treatment of ailment during last 15 days |        | persons reporting ailment during last 15 days |        |
|            | medical treatment (Govt.)                                                                                                            | medical treatment (Pvt.) | other expenses incurred due to ailment | total expenditure |                                                                    | estd. no. (00)                                             | sample | estd. no. (00)                                | sample |
| (1)        | (2)                                                                                                                                  | (3)                      | (4)                                    | (5)               | (6)                                                                | (7)                                                        | (8)    | (9)                                           | (10)   |
| 0-300      | 4                                                                                                                                    | 203                      | 25                                     | 231               | 259                                                                | 4333                                                       | 222    | 4465                                          | 234    |
| 300-350    | 2                                                                                                                                    | 246                      | 10                                     | 258               | 97                                                                 | 4860                                                       | 217    | 4921                                          | 226    |
| 350-425    | 5                                                                                                                                    | 185                      | 9                                      | 199               | 190                                                                | 10701                                                      | 566    | 11251                                         | 599    |
| 425-500    | 5                                                                                                                                    | 238                      | 15                                     | 259               | 91                                                                 | 20191                                                      | 1151   | 21073                                         | 1216   |
| 500-575    | 9                                                                                                                                    | 213                      | 14                                     | 236               | 96                                                                 | 10626                                                      | 610    | 10877                                         | 636    |
| 575-665    | 8                                                                                                                                    | 244                      | 20                                     | 272               | 72                                                                 | 15037                                                      | 864    | 16084                                         | 922    |
| 665-775    | 8                                                                                                                                    | 225                      | 20                                     | 253               | 75                                                                 | 24968                                                      | 1315   | 26198                                         | 1404   |
| 775-915    | 5                                                                                                                                    | 280                      | 18                                     | 304               | 70                                                                 | 20267                                                      | 1270   | 22194                                         | 1384   |
| 915-1120   | 3                                                                                                                                    | 270                      | 17                                     | 290               | 67                                                                 | 26630                                                      | 1510   | 28308                                         | 1611   |
| 1120-1500  | 4                                                                                                                                    | 389                      | 26                                     | 418               | 112                                                                | 31866                                                      | 1710   | 34069                                         | 1865   |
| 1500-1925  | 4                                                                                                                                    | 352                      | 15                                     | 371               | 70                                                                 | 8769                                                       | 570    | 10040                                         | 636    |
| 1925+      | 17                                                                                                                                   | 496                      | 35                                     | 548               | 104                                                                | 23504                                                      | 1088   | 26513                                         | 1224   |
| all        | 7                                                                                                                                    | 299                      | 20                                     | 326               | 96                                                                 | 201751                                                     | 11093  | 215992                                        | 11957  |

Table (45): Average total expenditure incurred during the last 15 days on account of treatment per ailing person (but not as inpatient of a hospital) for each sex and mpce class

| all-India  |                                                                                                                                      | Rural + Urban            |                                        |                   |                                                                    | Males                                                      |        |                                               |        |
|------------|--------------------------------------------------------------------------------------------------------------------------------------|--------------------------|----------------------------------------|-------------------|--------------------------------------------------------------------|------------------------------------------------------------|--------|-----------------------------------------------|--------|
| mpce class | average total expenditure (Rs) per treated person during the last 15 days on account of ailment (but not as inpatient of a hospital) |                          |                                        |                   | average loss of hhs. income due to ailment (Rs.) per ailing person | persons reporting treatment of ailment during last 15 days |        | persons reporting ailment during last 15 days |        |
|            | medical treatment (Govt.)                                                                                                            | medical treatment (Pvt.) | other expenses incurred due to ailment | total expenditure |                                                                    | estd. no. (00)                                             | sample | estd. no. (00)                                | sample |
| (1)        | (2)                                                                                                                                  | (3)                      | (4)                                    | (5)               | (6)                                                                | (7)                                                        | (8)    | (9)                                           | (10)   |
| 0 – 235    | 9                                                                                                                                    | 190                      | 28                                     | 226               | 1079                                                               | 12324                                                      | 436    | 12587                                         | 457    |
| 235 – 265  | 7                                                                                                                                    | 226                      | 13                                     | 246               | 180                                                                | 9536                                                       | 326    | 9830                                          | 338    |
| 265 – 320  | 9                                                                                                                                    | 202                      | 18                                     | 230               | 180                                                                | 21888                                                      | 824    | 23035                                         | 862    |
| 320 – 365  | 21                                                                                                                                   | 185                      | 27                                     | 234               | 121                                                                | 24992                                                      | 1087   | 25944                                         | 1144   |
| 365 – 410  | 17                                                                                                                                   | 199                      | 23                                     | 239               | 144                                                                | 25422                                                      | 990    | 26810                                         | 1036   |
| 410 – 460  | 14                                                                                                                                   | 219                      | 22                                     | 255               | 124                                                                | 29726                                                      | 1229   | 30637                                         | 1284   |
| 460 – 520  | 10                                                                                                                                   | 233                      | 24                                     | 268               | 207                                                                | 36553                                                      | 1523   | 37932                                         | 1616   |
| 520 – 605  | 13                                                                                                                                   | 370                      | 25                                     | 408               | 230                                                                | 36351                                                      | 1600   | 38064                                         | 1697   |
| 605 – 730  | 7                                                                                                                                    | 243                      | 23                                     | 274               | 149                                                                | 39947                                                      | 1776   | 41734                                         | 1871   |
| 730 – 980  | 4                                                                                                                                    | 316                      | 27                                     | 348               | 157                                                                | 49445                                                      | 2128   | 51662                                         | 2248   |
| 980 – 1285 | 12                                                                                                                                   | 296                      | 34                                     | 342               | 144                                                                | 21527                                                      | 942    | 23127                                         | 1007   |
| 1285 +     | 8                                                                                                                                    | 493                      | 42                                     | 543               | 153                                                                | 31725                                                      | 1404   | 34067                                         | 1517   |
| all        | 11                                                                                                                                   | 278                      | 26                                     | 315               | 197                                                                | 339434                                                     | 14265  | 355429                                        | 15077  |

Table (45): Average total expenditure incurred during the last 15 days on account of treatment per ailing person (but not as inpatient of a hospital) for each sex and mpce class

| all-India  |                                                                                                                                      | Rural + Urban            |                                        |                   |                                                                    | Females                                                    |        |                                               |        |
|------------|--------------------------------------------------------------------------------------------------------------------------------------|--------------------------|----------------------------------------|-------------------|--------------------------------------------------------------------|------------------------------------------------------------|--------|-----------------------------------------------|--------|
| mpce class | average total expenditure (Rs) per treated person during the last 15 days on account of ailment (but not as inpatient of a hospital) |                          |                                        |                   | average loss of hhs. income due to ailment (Rs.) per ailing person | persons reporting treatment of ailment during last 15 days |        | persons reporting ailment during last 15 days |        |
|            | medical treatment (Govt.)                                                                                                            | medical treatment (Pvt.) | other expenses incurred due to ailment | total expenditure |                                                                    | estd. no. (00)                                             | sample | estd. no. (00)                                | sample |
| (1)        | (2)                                                                                                                                  | (3)                      | (4)                                    | (5)               | (6)                                                                | (7)                                                        | (8)    | (9)                                           | (10)   |
| 0 – 235    | 8                                                                                                                                    | 149                      | 13                                     | 170               | 47                                                                 | 12041                                                      | 408    | 12615                                         | 439    |
| 235 – 265  | 6                                                                                                                                    | 216                      | 19                                     | 241               | 45                                                                 | 8673                                                       | 320    | 9384                                          | 347    |
| 265 – 320  | 16                                                                                                                                   | 152                      | 18                                     | 187               | 58                                                                 | 23085                                                      | 842    | 23841                                         | 890    |
| 320 – 365  | 6                                                                                                                                    | 232                      | 19                                     | 257               | 50                                                                 | 26220                                                      | 1155   | 27246                                         | 1208   |
| 365 – 410  | 6                                                                                                                                    | 196                      | 20                                     | 223               | 60                                                                 | 26939                                                      | 1068   | 27999                                         | 1109   |
| 410 – 460  | 19                                                                                                                                   | 207                      | 30                                     | 256               | 58                                                                 | 31471                                                      | 1260   | 32902                                         | 1321   |
| 460 – 520  | 8                                                                                                                                    | 200                      | 19                                     | 226               | 59                                                                 | 40728                                                      | 1618   | 42277                                         | 1694   |
| 520 – 605  | 9                                                                                                                                    | 249                      | 27                                     | 285               | 59                                                                 | 39624                                                      | 1682   | 41997                                         | 1787   |
| 605 – 730  | 4                                                                                                                                    | 258                      | 26                                     | 288               | 66                                                                 | 40549                                                      | 1830   | 42498                                         | 1933   |
| 730 – 980  | 4                                                                                                                                    | 290                      | 29                                     | 324               | 48                                                                 | 49216                                                      | 2271   | 51308                                         | 2406   |
| 980 – 1285 | 8                                                                                                                                    | 291                      | 25                                     | 323               | 49                                                                 | 25305                                                      | 1061   | 27162                                         | 1130   |
| 1285 +     | 19                                                                                                                                   | 354                      | 32                                     | 405               | 51                                                                 | 39547                                                      | 1582   | 41917                                         | 1701   |
| all        | 9                                                                                                                                    | 245                      | 25                                     | 279               | 55                                                                 | 363396                                                     | 15097  | 381147                                        | 15965  |

Table (45): Average total expenditure incurred during the last 15 days on account of treatment per ailing person (but not as inpatient of a hospital) for each sex and mpce class

| all-India<br>mpce class | Rural + Urban                                                                                                                        |                          |                                        |                   | Persons                                                            |                                                            |        |                                               |        |
|-------------------------|--------------------------------------------------------------------------------------------------------------------------------------|--------------------------|----------------------------------------|-------------------|--------------------------------------------------------------------|------------------------------------------------------------|--------|-----------------------------------------------|--------|
|                         | average total expenditure (Rs) per treated person during the last 15 days on account of ailment (but not as inpatient of a hospital) |                          |                                        |                   | average loss of hhs. income due to ailment (Rs.) per ailing person | persons reporting treatment of ailment during last 15 days |        | persons reporting ailment during last 15 days |        |
|                         | medical treatment (Govt.)                                                                                                            | medical treatment (Pvt.) | other expenses incurred due to ailment | total expenditure |                                                                    | estd. no. (00)                                             | sample | estd. no. (00)                                | sample |
| (1)                     | (2)                                                                                                                                  | (3)                      | (4)                                    | (5)               | (6)                                                                | (7)                                                        | (8)    | (9)                                           | (10)   |
| 0 – 235                 | 8                                                                                                                                    | 170                      | 20                                     | 198               | 569                                                                | 24365                                                      | 844    | 25203                                         | 896    |
| 235 – 265               | 7                                                                                                                                    | 221                      | 16                                     | 244               | 116                                                                | 18209                                                      | 646    | 19214                                         | 685    |
| 265 – 320               | 13                                                                                                                                   | 177                      | 18                                     | 208               | 117                                                                | 44972                                                      | 1666   | 46876                                         | 1752   |
| 320 – 365               | 13                                                                                                                                   | 209                      | 23                                     | 245               | 84                                                                 | 51211                                                      | 2242   | 53190                                         | 2352   |
| 365 – 410               | 11                                                                                                                                   | 198                      | 22                                     | 231               | 101                                                                | 52360                                                      | 2058   | 54810                                         | 2145   |
| 410 – 460               | 16                                                                                                                                   | 213                      | 26                                     | 255               | 90                                                                 | 61197                                                      | 2489   | 63539                                         | 2605   |
| 460 – 520               | 9                                                                                                                                    | 216                      | 21                                     | 246               | 129                                                                | 77281                                                      | 3141   | 80209                                         | 3310   |
| 520 – 605               | 11                                                                                                                                   | 307                      | 26                                     | 344               | 141                                                                | 75974                                                      | 3282   | 80061                                         | 3484   |
| 605 – 730               | 6                                                                                                                                    | 251                      | 25                                     | 281               | 107                                                                | 80496                                                      | 3606   | 84232                                         | 3804   |
| 730 – 980               | 4                                                                                                                                    | 303                      | 28                                     | 336               | 102                                                                | 98661                                                      | 4399   | 102970                                        | 4654   |
| 980 – 1285              | 9                                                                                                                                    | 293                      | 29                                     | 332               | 93                                                                 | 46831                                                      | 2003   | 50289                                         | 2137   |
| 1285 +                  | 14                                                                                                                                   | 416                      | 36                                     | 466               | 96                                                                 | 71272                                                      | 2986   | 75984                                         | 3218   |
| all                     | 10                                                                                                                                   | 261                      | 25                                     | 297               | 124                                                                | 702831                                                     | 29362  | 736576                                        | 31042  |

Table (46): Per 1000 distribution of ailing persons among those who were medically treated but not as inpatient of hospital during last 15 days by type of payment made for availing some services for each category of specific medical service for each State/UT

| medical service: surgery |                                         |                   |             |            |       | Rural                                   |        |
|--------------------------|-----------------------------------------|-------------------|-------------|------------|-------|-----------------------------------------|--------|
| state/ut                 | type of payment for services            |                   |             |            | total | number of persons with ailments treated |        |
|                          | medical service not received / required | services received |             |            |       | estd. no. (00)                          | sample |
|                          |                                         | free              | partly free | on payment |       |                                         |        |
| (1)                      | (2)                                     | (3)               | (4)         | (5)        | (6)   | (7)                                     | (8)    |
| Andhra Pradesh           | 991                                     | 4                 | 0           | 5          | 1000  | 34263                                   | 1255   |
| Arunachal Pradesh        | 923                                     | 24                | 10          | 43         | 1000  | 204                                     | 95     |
| Assam                    | 990                                     | 0                 | 0           | 10         | 1000  | 12124                                   | 611    |
| Bihar                    | 972                                     | 12                | 0           | 16         | 1000  | 23319                                   | 802    |
| Chhattisgarh             | 979                                     | 1                 | 3           | 17         | 1000  | 10732                                   | 377    |
| Delhi                    | 1000                                    | 0                 | 0           | 0          | 1000  | 69                                      | 3      |
| Goa                      | 1000                                    | 0                 | 0           | 0          | 1000  | 1504                                    | 35     |
| Gujarat                  | 980                                     | 11                | 1           | 8          | 1000  | 18147                                   | 540    |
| Haryana                  | 994                                     | 1                 | 0           | 5          | 1000  | 12716                                   | 469    |
| Himachal Pradesh         | 982                                     | 0                 | 0           | 18         | 1000  | 4317                                    | 600    |
| Jammu & Kashmir          | 989                                     | 1                 | 5           | 6          | 1000  | 3411                                    | 309    |
| Jharkhand                | 972                                     | 12                | 0           | 16         | 1000  | 5430                                    | 207    |
| Karnataka                | 992                                     | 2                 | 0           | 6          | 1000  | 16399                                   | 537    |
| Kerala                   | 982                                     | 2                 | 3           | 12         | 1000  | 49700                                   | 1797   |
| Madhya Pradesh           | 989                                     | 2                 | 0           | 8          | 1000  | 23706                                   | 726    |
| Maharashtra              | 975                                     | 6                 | 0           | 19         | 1000  | 44473                                   | 1248   |
| Manipur                  | 742                                     | 107               | 0           | 151        | 1000  | 304                                     | 106    |
| Meghalaya                | 986                                     | 14                | 0           | 0          | 1000  | 295                                     | 55     |
| Mizoram                  | 1000                                    | 0                 | 0           | 0          | 1000  | 11                                      | 6      |
| Nagaland                 | 1000                                    | 0                 | 0           | 0          | 1000  | 222                                     | 67     |
| Orissa                   | 990                                     | 5                 | 0           | 5          | 1000  | 17523                                   | 565    |
| Punjab                   | 985                                     | 7                 | 0           | 9          | 1000  | 19786                                   | 599    |
| Rajasthan                | 987                                     | 8                 | 0           | 6          | 1000  | 20451                                   | 814    |
| Sikkim                   | 988                                     | 9                 | 0           | 3          | 1000  | 119                                     | 62     |
| Tamil Nadu               | 998                                     | 2                 | 0           | 0          | 1000  | 29491                                   | 895    |
| Tripura                  | 993                                     | 3                 | 0           | 4          | 1000  | 3064                                    | 446    |
| Uttaranchal              | 992                                     | 2                 | 0           | 6          | 1000  | 3051                                    | 105    |
| Uttar Pradesh            | 980                                     | 1                 | 0           | 19         | 1000  | 95349                                   | 3297   |
| West Bengal              | 988                                     | 1                 | 0           | 12         | 1000  | 49120                                   | 1371   |
| A & N Islands            | 1000                                    | 0                 | 0           | 0          | 1000  | 99                                      | 30     |
| Chandigarh               | 865                                     | 0                 | 0           | 135        | 1000  | 46                                      | 37     |
| Dadra & N. Haveli        | 1000                                    | 0                 | 0           | 0          | 1000  | 32                                      | 12     |
| Daman & Diu              | 1000                                    | 0                 | 0           | 0          | 1000  | 18                                      | 13     |
| Lakshadweep              | 958                                     | 42                | 0           | 0          | 1000  | 20                                      | 44     |
| Pondicherry              | 1000                                    | 0                 | 0           | 0          | 1000  | 244                                     | 31     |
| ONES                     | 971                                     | 12                | 1           | 16         | 1000  | 4218                                    | 837    |
| GUTs                     | 984                                     | 2                 | 0           | 14         | 1000  | 460                                     | 167    |
| all-India                | 984                                     | 4                 | 0           | 12         | 1000  | 499762                                  | 18166  |



Table (46): Per 1000 distribution of ailing persons among those who were medically treated but not as inpatient of hospital during last 15 days by type of payment made for availing some services for each category of specific medical service for each State/UT

| medical service: surgery |                                         |                   |             |            |       | Urban                                   |        |
|--------------------------|-----------------------------------------|-------------------|-------------|------------|-------|-----------------------------------------|--------|
| state/ut                 | type of payment for services            |                   |             |            | total | number of persons with ailments treated |        |
|                          | medical service not received / required | services received |             |            |       | estd. no. (00)                          | sample |
|                          |                                         | free              | partly free | on payment |       |                                         |        |
| (1)                      | (2)                                     | (3)               | (4)         | (5)        | (6)   | (7)                                     | (8)    |
| Andhra Pradesh           | 982                                     | 0                 | 0           | 17         | 1000  | 18553                                   | 969    |
| Arunachal Pradesh        | 416                                     | 352               | 0           | 232        | 1000  | 7                                       | 11     |
| Assam                    | 974                                     | 26                | 0           | 0          | 1000  | 1603                                    | 150    |
| Bihar                    | 991                                     | 5                 | 0           | 4          | 1000  | 3975                                    | 189    |
| Chhattisgarh             | 992                                     | 8                 | 0           | 0          | 1000  | 1830                                    | 150    |
| Delhi                    | 973                                     | 2                 | 1           | 23         | 1000  | 1483                                    | 105    |
| Goa                      | 984                                     | 16                | 0           | 0          | 1000  | 431                                     | 43     |
| Gujarat                  | 982                                     | 1                 | 0           | 17         | 1000  | 11437                                   | 558    |
| Haryana                  | 967                                     | 2                 | 0           | 31         | 1000  | 3992                                    | 254    |
| Himachal Pradesh         | 995                                     | 0                 | 0           | 5          | 1000  | 312                                     | 81     |
| Jammu & Kashmir          | 931                                     | 6                 | 0           | 63         | 1000  | 994                                     | 150    |
| Jharkhand                | 978                                     | 0                 | 0           | 22         | 1000  | 1689                                    | 118    |
| Karnataka                | 991                                     | 6                 | 0           | 3          | 1000  | 6748                                    | 515    |
| Kerala                   | 995                                     | 1                 | 0           | 4          | 1000  | 17272                                   | 939    |
| Madhya Pradesh           | 973                                     | 2                 | 0           | 25         | 1000  | 8984                                    | 510    |
| Maharashtra              | 992                                     | 2                 | 0           | 6          | 1000  | 39662                                   | 1467   |
| Manipur                  | 759                                     | 153               | 0           | 88         | 1000  | 110                                     | 62     |
| Meghalaya                | 944                                     | 0                 | 0           | 56         | 1000  | 102                                     | 39     |
| Mizoram                  | 971                                     | 0                 | 0           | 29         | 1000  | 19                                      | 28     |
| Nagaland                 | 1000                                    | 0                 | 0           | 0          | 1000  | 125                                     | 34     |
| Orissa                   | 989                                     | 9                 | 2           | 0          | 1000  | 1702                                    | 137    |
| Punjab                   | 967                                     | 6                 | 0           | 26         | 1000  | 7775                                    | 386    |
| Rajasthan                | 961                                     | 1                 | 0           | 38         | 1000  | 6804                                    | 477    |
| Sikkim                   | 1000                                    | 0                 | 0           | 0          | 1000  | 5                                       | 10     |
| Tamil Nadu               | 999                                     | 1                 | 0           | 0          | 1000  | 17788                                   | 1051   |
| Tripura                  | 1000                                    | 0                 | 0           | 0          | 1000  | 230                                     | 68     |
| Uttaranchal              | 991                                     | 0                 | 0           | 9          | 1000  | 1045                                    | 95     |
| Uttar Pradesh            | 992                                     | 1                 | 0           | 7          | 1000  | 31435                                   | 1531   |
| West Bengal              | 989                                     | 9                 | 0           | 2          | 1000  | 23247                                   | 1085   |
| A & N Islands            | 1000                                    | 0                 | 0           | 0          | 1000  | 59                                      | 34     |
| Chandigarh               | 990                                     | 0                 | 0           | 10         | 1000  | 400                                     | 128    |
| Dadra & N. Haveli        | 1000                                    | 0                 | 0           | 0          | 1000  | 7                                       | 7      |
| Daman & Diu              | 948                                     | 0                 | 0           | 52         | 1000  | 13                                      | 14     |
| Lakshadweep              | 986                                     | 14                | 0           | 0          | 1000  | 39                                      | 71     |
| Pondicherry              | 1000                                    | 0                 | 0           | 0          | 1000  | 810                                     | 115    |
| ONES                     | 938                                     | 32                | 0           | 29         | 1000  | 599                                     | 252    |
| GUTs                     | 996                                     | 0                 | 0           | 3          | 1000  | 1328                                    | 369    |
| all-India                | 987                                     | 3                 | 0           | 10         | 1000  | 210686                                  | 11581  |



Table (46): Per 1000 distribution of ailing persons among those who were medically treated but not as inpatient of hospital during last 15 days by type of payment made for availing some services for each category of specific medical service for each State/UT

| medical service: surgery |                                         |                   |             |            | Rural + Urban |                                         |        |
|--------------------------|-----------------------------------------|-------------------|-------------|------------|---------------|-----------------------------------------|--------|
| state/ut                 | type of payment for services            |                   |             |            | total         | number of persons with ailments treated |        |
|                          | medical service not received / required | services received |             |            |               | estd. no. (00)                          | sample |
|                          |                                         | free              | partly free | on payment |               |                                         |        |
| (1)                      | (2)                                     | (3)               | (4)         | (5)        | (6)           | (7)                                     | (8)    |
| Andhra Pradesh           | 988                                     | 2                 | 0           | 9          | 1000          | 52816                                   | 2224   |
| Arunachal Pradesh        | 905                                     | 35                | 10          | 50         | 1000          | 212                                     | 106    |
| Assam                    | 988                                     | 3                 | 0           | 9          | 1000          | 13727                                   | 761    |
| Bihar                    | 975                                     | 11                | 0           | 14         | 1000          | 27295                                   | 991    |
| Chhattisgarh             | 981                                     | 2                 | 3           | 14         | 1000          | 12562                                   | 527    |
| Delhi                    | 975                                     | 2                 | 1           | 22         | 1000          | 1552                                    | 108    |
| Goa                      | 996                                     | 4                 | 0           | 0          | 1000          | 1935                                    | 78     |
| Gujarat                  | 981                                     | 7                 | 1           | 11         | 1000          | 29585                                   | 1098   |
| Haryana                  | 988                                     | 1                 | 0           | 12         | 1000          | 16708                                   | 723    |
| Himachal Pradesh         | 983                                     | 0                 | 0           | 17         | 1000          | 4629                                    | 681    |
| Jammu & Kashmir          | 976                                     | 2                 | 4           | 19         | 1000          | 4405                                    | 459    |
| Jharkhand                | 973                                     | 9                 | 0           | 18         | 1000          | 7119                                    | 325    |
| Karnataka                | 992                                     | 3                 | 0           | 5          | 1000          | 23147                                   | 1052   |
| Kerala                   | 986                                     | 2                 | 2           | 10         | 1000          | 66971                                   | 2736   |
| Madhya Pradesh           | 985                                     | 2                 | 0           | 13         | 1000          | 32690                                   | 1236   |
| Maharashtra              | 983                                     | 4                 | 0           | 13         | 1000          | 84135                                   | 2715   |
| Manipur                  | 747                                     | 119               | 0           | 134        | 1000          | 413                                     | 168    |
| Meghalaya                | 975                                     | 10                | 0           | 14         | 1000          | 397                                     | 94     |
| Mizoram                  | 982                                     | 0                 | 0           | 18         | 1000          | 29                                      | 34     |
| Nagaland                 | 1000                                    | 0                 | 0           | 0          | 1000          | 347                                     | 101    |
| Orissa                   | 990                                     | 5                 | 0           | 4          | 1000          | 19225                                   | 702    |
| Punjab                   | 980                                     | 7                 | 0           | 14         | 1000          | 27561                                   | 985    |
| Rajasthan                | 980                                     | 6                 | 0           | 14         | 1000          | 27255                                   | 1291   |
| Sikkim                   | 988                                     | 9                 | 0           | 3          | 1000          | 124                                     | 72     |
| Tamil Nadu               | 998                                     | 2                 | 0           | 0          | 1000          | 47280                                   | 1946   |
| Tripura                  | 993                                     | 3                 | 0           | 4          | 1000          | 3294                                    | 514    |
| Uttaranchal              | 992                                     | 1                 | 0           | 7          | 1000          | 4095                                    | 200    |
| Uttar Pradesh            | 982                                     | 1                 | 0           | 16         | 1000          | 126785                                  | 4828   |
| West Bengal              | 988                                     | 3                 | 0           | 9          | 1000          | 72367                                   | 2456   |
| A & N Islands            | 1000                                    | 0                 | 0           | 0          | 1000          | 159                                     | 64     |
| Chandigarh               | 977                                     | 0                 | 0           | 23         | 1000          | 447                                     | 165    |
| Dadra & N. Haveli        | 1000                                    | 0                 | 0           | 0          | 1000          | 39                                      | 19     |
| Daman & Diu              | 979                                     | 0                 | 0           | 21         | 1000          | 31                                      | 27     |
| Lakshadweep              | 976                                     | 24                | 0           | 0          | 1000          | 59                                      | 115    |
| Pondicherry              | 1000                                    | 0                 | 0           | 0          | 1000          | 1054                                    | 146    |
| ONES                     | 967                                     | 15                | 0           | 18         | 1000          | 4818                                    | 1089   |
| GUTs                     | 993                                     | 1                 | 0           | 6          | 1000          | 1789                                    | 536    |
| all-India                | 985                                     | 3                 | 0           | 11         | 1000          | 710448                                  | 29747  |

Table (46): Per 1000 distribution of ailing persons among those who were medically treated but not as inpatient of hospital during last 15 days by type of payment made for availing some services for each category of specific medical service for each State/UT

| medical service: medicine |                                         |                   |             |            |       | Rural                                   |        |
|---------------------------|-----------------------------------------|-------------------|-------------|------------|-------|-----------------------------------------|--------|
| state/ut                  | type of payment for services            |                   |             |            | total | number of persons with ailments treated |        |
|                           | medical service not received / required | services received |             |            |       | estd. no. (00)                          | sample |
|                           |                                         | free              | partly free | on payment |       |                                         |        |
| (1)                       | (2)                                     | (3)               | (4)         | (5)        | (6)   | (7)                                     | (8)    |
| Andhra Pradesh            | 92                                      | 103               | 35          | 769        | 1000  | 34510                                   | 1263   |
| Arunachal Pradesh         | 419                                     | 214               | 183         | 184        | 1000  | 288                                     | 143    |
| Assam                     | 183                                     | 27                | 81          | 709        | 1000  | 13073                                   | 658    |
| Bihar                     | 256                                     | 3                 | 5           | 737        | 1000  | 24756                                   | 836    |
| Chhattisgarh              | 150                                     | 21                | 12          | 818        | 1000  | 10739                                   | 377    |
| Delhi                     | 0                                       | 0                 | 0           | 1000       | 1000  | 69                                      | 3      |
| Goa                       | 142                                     | 52                | 0           | 806        | 1000  | 1504                                    | 35     |
| Gujarat                   | 48                                      | 86                | 64          | 802        | 1000  | 18147                                   | 540    |
| Haryana                   | 13                                      | 13                | 34          | 940        | 1000  | 12716                                   | 469    |
| Himachal Pradesh          | 46                                      | 36                | 59          | 859        | 1000  | 4317                                    | 600    |
| Jammu & Kashmir           | 63                                      | 36                | 147         | 754        | 1000  | 3411                                    | 309    |
| Jharkhand                 | 90                                      | 0                 | 4           | 906        | 1000  | 5726                                    | 216    |
| Karnataka                 | 0                                       | 146               | 99          | 754        | 1000  | 16399                                   | 537    |
| Kerala                    | 28                                      | 111               | 85          | 776        | 1000  | 49861                                   | 1802   |
| Madhya Pradesh            | 108                                     | 32                | 55          | 804        | 1000  | 23816                                   | 728    |
| Maharashtra               | 117                                     | 63                | 33          | 786        | 1000  | 44478                                   | 1249   |
| Manipur                   | 58                                      | 0                 | 0           | 942        | 1000  | 338                                     | 114    |
| Meghalaya                 | 110                                     | 180               | 113         | 596        | 1000  | 295                                     | 55     |
| Mizoram                   | 90                                      | 21                | 0           | 889        | 1000  | 11                                      | 6      |
| Nagaland                  | 100                                     | 5                 | 12          | 883        | 1000  | 222                                     | 67     |
| Orissa                    | 237                                     | 78                | 42          | 643        | 1000  | 17583                                   | 573    |
| Punjab                    | 378                                     | 12                | 39          | 571        | 1000  | 19786                                   | 599    |
| Rajasthan                 | 42                                      | 32                | 12          | 915        | 1000  | 20451                                   | 814    |
| Sikkim                    | 224                                     | 143               | 77          | 556        | 1000  | 124                                     | 65     |
| Tamil Nadu                | 13                                      | 257               | 38          | 692        | 1000  | 29491                                   | 895    |
| Tripura                   | 173                                     | 15                | 190         | 623        | 1000  | 3074                                    | 448    |
| Uttaranchal               | 90                                      | 11                | 1           | 898        | 1000  | 3051                                    | 105    |
| Uttar Pradesh             | 95                                      | 22                | 15          | 868        | 1000  | 95953                                   | 3318   |
| West Bengal               | 91                                      | 40                | 57          | 811        | 1000  | 50589                                   | 1407   |
| A & N Islands             | 160                                     | 702               | 129         | 9          | 1000  | 99                                      | 30     |
| Chandigarh                | 0                                       | 0                 | 17          | 983        | 1000  | 46                                      | 37     |
| Dadra & N. Haveli         | 0                                       | 34                | 32          | 934        | 1000  | 32                                      | 12     |
| Daman & Diu               | 0                                       | 21                | 0           | 979        | 1000  | 18                                      | 13     |
| Lakshadweep               | 64                                      | 779               | 0           | 156        | 1000  | 20                                      | 44     |
| Pondicherry               | 0                                       | 619               | 0           | 381        | 1000  | 244                                     | 31     |
| ONES                      | 174                                     | 41                | 157         | 629        | 1000  | 4352                                    | 898    |
| GUTs                      | 37                                      | 517               | 32          | 414        | 1000  | 460                                     | 167    |
| all-India                 | 104                                     | 64                | 42          | 790        | 1000  | 505239                                  | 18398  |

Table (46): Per 1000 distribution of ailing persons among those who were medically treated but not as inpatient of hospital during last 15 days by type of payment made for availing some services for each category of specific medical service for each State/UT

| state/ut          | type of payment for services            |                   |             |            | total | Urban                                   |        |
|-------------------|-----------------------------------------|-------------------|-------------|------------|-------|-----------------------------------------|--------|
|                   | medical service not received / required | services received |             |            |       | number of persons with ailments treated |        |
|                   |                                         | free              | partly free | on payment |       | estd. no. (00)                          | sample |
| (1)               | (2)                                     | (3)               | (4)         | (5)        | (6)   | (7)                                     | (8)    |
| Andhra Pradesh    | 62                                      | 69                | 47          | 821        | 1000  | 18878                                   | 974    |
| Arunachal Pradesh | 6                                       | 4                 | 5           | 985        | 1000  | 36                                      | 34     |
| Assam             | 62                                      | 56                | 105         | 777        | 1000  | 1679                                    | 157    |
| Bihar             | 611                                     | 18                | 24          | 347        | 1000  | 4012                                    | 195    |
| Chhattisgarh      | 75                                      | 192               | 32          | 701        | 1000  | 1830                                    | 150    |
| Delhi             | 57                                      | 100               | 82          | 761        | 1000  | 1483                                    | 105    |
| Goa               | 204                                     | 114               | 35          | 647        | 1000  | 431                                     | 43     |
| Gujarat           | 49                                      | 117               | 27          | 808        | 1000  | 11437                                   | 558    |
| Haryana           | 27                                      | 31                | 19          | 923        | 1000  | 3988                                    | 253    |
| Himachal Pradesh  | 15                                      | 89                | 90          | 805        | 1000  | 312                                     | 81     |
| Jammu & Kashmir   | 71                                      | 28                | 68          | 834        | 1000  | 998                                     | 151    |
| Jharkhand         | 108                                     | 83                | 32          | 777        | 1000  | 1715                                    | 126    |
| Karnataka         | 11                                      | 48                | 79          | 862        | 1000  | 6748                                    | 515    |
| Kerala            | 50                                      | 66                | 63          | 821        | 1000  | 17330                                   | 942    |
| Madhya Pradesh    | 83                                      | 53                | 31          | 832        | 1000  | 9013                                    | 513    |
| Maharashtra       | 128                                     | 45                | 37          | 790        | 1000  | 39704                                   | 1471   |
| Manipur           | 26                                      | 5                 | 4           | 965        | 1000  | 122                                     | 65     |
| Meghalaya         | 21                                      | 86                | 120         | 773        | 1000  | 93                                      | 39     |
| Mizoram           | 148                                     | 34                | 0           | 818        | 1000  | 17                                      | 27     |
| Nagaland          | 10                                      | 0                 | 30          | 960        | 1000  | 125                                     | 34     |
| Orissa            | 219                                     | 50                | 25          | 706        | 1000  | 1795                                    | 143    |
| Punjab            | 252                                     | 16                | 8           | 724        | 1000  | 7775                                    | 386    |
| Rajasthan         | 28                                      | 75                | 27          | 870        | 1000  | 6804                                    | 477    |
| Sikkim            | 0                                       | 111               | 167         | 722        | 1000  | 5                                       | 10     |
| Tamil Nadu        | 4                                       | 206               | 53          | 736        | 1000  | 17788                                   | 1051   |
| Tripura           | 281                                     | 0                 | 87          | 632        | 1000  | 234                                     | 69     |
| Uttaranchal       | 49                                      | 98                | 2           | 851        | 1000  | 1045                                    | 95     |
| Uttar Pradesh     | 62                                      | 43                | 16          | 879        | 1000  | 31539                                   | 1541   |
| West Bengal       | 37                                      | 49                | 40          | 874        | 1000  | 23482                                   | 1102   |
| A & N Islands     | 0                                       | 566               | 34          | 399        | 1000  | 59                                      | 34     |
| Chandigarh        | 6                                       | 38                | 0           | 957        | 1000  | 400                                     | 128    |
| Dadra & N. Haveli | 0                                       | 181               | 0           | 819        | 1000  | 7                                       | 7      |
| Daman & Diu       | 14                                      | 58                | 0           | 928        | 1000  | 13                                      | 14     |
| Lakshadweep       | 0                                       | 971               | 0           | 29         | 1000  | 39                                      | 71     |
| Pondicherry       | 0                                       | 330               | 8           | 662        | 1000  | 810                                     | 115    |
| ONES              | 118                                     | 16                | 58          | 808        | 1000  | 633                                     | 278    |
| GUTs              | 2                                       | 268               | 6           | 724        | 1000  | 1328                                    | 369    |
| all-India         | 82                                      | 70                | 38          | 811        | 1000  | 211746                                  | 11676  |

Table (46): Per 1000 distribution of ailing persons among those who were medically treated but not as inpatient of hospital during last 15 days by type of payment made for availing some services for each category of specific medical service for each State/UT

| medical service: medicine |                                         |                   |             |            | Rural + Urban |                                         |        |
|---------------------------|-----------------------------------------|-------------------|-------------|------------|---------------|-----------------------------------------|--------|
| state/ut                  | type of payment for services            |                   |             |            | total         | number of persons with ailments treated |        |
|                           | medical service not received / required | services received |             |            |               | estd. no. (00)                          | sample |
|                           |                                         | free              | partly free | on payment |               |                                         |        |
| (1)                       | (2)                                     | (3)               | (4)         | (5)        | (6)           | (7)                                     | (8)    |
| Andhra Pradesh            | 82                                      | 91                | 39          | 788        | 1000          | 53387                                   | 2237   |
| Arunachal Pradesh         | 373                                     | 191               | 163         | 273        | 1000          | 325                                     | 177    |
| Assam                     | 169                                     | 31                | 84          | 716        | 1000          | 14753                                   | 815    |
| Bihar                     | 305                                     | 5                 | 7           | 683        | 1000          | 28768                                   | 1031   |
| Chhattisgarh              | 139                                     | 45                | 14          | 801        | 1000          | 12569                                   | 527    |
| Delhi                     | 54                                      | 96                | 78          | 772        | 1000          | 1552                                    | 108    |
| Goa                       | 156                                     | 66                | 8           | 771        | 1000          | 1935                                    | 78     |
| Gujarat                   | 48                                      | 98                | 49          | 804        | 1000          | 29585                                   | 1098   |
| Haryana                   | 16                                      | 17                | 30          | 936        | 1000          | 16704                                   | 722    |
| Himachal Pradesh          | 44                                      | 40                | 61          | 855        | 1000          | 4629                                    | 681    |
| Jammu & Kashmir           | 65                                      | 34                | 129         | 772        | 1000          | 4409                                    | 460    |
| Jharkhand                 | 94                                      | 19                | 11          | 876        | 1000          | 7441                                    | 342    |
| Karnataka                 | 4                                       | 118               | 94          | 785        | 1000          | 23147                                   | 1052   |
| Kerala                    | 33                                      | 99                | 79          | 788        | 1000          | 67191                                   | 2744   |
| Madhya Pradesh            | 101                                     | 38                | 49          | 812        | 1000          | 32828                                   | 1241   |
| Maharashtra               | 122                                     | 55                | 35          | 788        | 1000          | 84182                                   | 2720   |
| Manipur                   | 50                                      | 1                 | 1           | 948        | 1000          | 460                                     | 179    |
| Meghalaya                 | 89                                      | 158               | 115         | 639        | 1000          | 388                                     | 94     |
| Mizoram                   | 126                                     | 29                | 0           | 845        | 1000          | 28                                      | 33     |
| Nagaland                  | 67                                      | 3                 | 19          | 911        | 1000          | 347                                     | 101    |
| Orissa                    | 235                                     | 76                | 40          | 649        | 1000          | 19379                                   | 716    |
| Punjab                    | 343                                     | 13                | 31          | 614        | 1000          | 27561                                   | 985    |
| Rajasthan                 | 38                                      | 42                | 16          | 904        | 1000          | 27255                                   | 1291   |
| Sikkim                    | 215                                     | 142               | 81          | 563        | 1000          | 129                                     | 75     |
| Tamil Nadu                | 10                                      | 238               | 44          | 709        | 1000          | 47280                                   | 1946   |
| Tripura                   | 181                                     | 14                | 183         | 623        | 1000          | 3308                                    | 517    |
| Uttaranchal               | 80                                      | 33                | 1           | 886        | 1000          | 4095                                    | 200    |
| Uttar Pradesh             | 87                                      | 27                | 15          | 871        | 1000          | 127492                                  | 4859   |
| West Bengal               | 74                                      | 43                | 52          | 831        | 1000          | 74071                                   | 2509   |
| A & N Islands             | 100                                     | 651               | 93          | 155        | 1000          | 159                                     | 64     |
| Chandigarh                | 5                                       | 34                | 2           | 959        | 1000          | 447                                     | 165    |
| Dadra & N. Haveli         | 0                                       | 59                | 27          | 914        | 1000          | 39                                      | 19     |
| Daman & Diu               | 6                                       | 36                | 0           | 959        | 1000          | 31                                      | 27     |
| Lakshadweep               | 22                                      | 905               | 0           | 73         | 1000          | 59                                      | 115    |
| Pondicherry               | 0                                       | 397               | 6           | 597        | 1000          | 1054                                    | 146    |
| ONES                      | 167                                     | 38                | 144         | 651        | 1000          | 4985                                    | 1176   |
| GUTs                      | 11                                      | 332               | 13          | 644        | 1000          | 1789                                    | 536    |
| all-India                 | 97                                      | 66                | 41          | 796        | 1000          | 716986                                  | 30074  |

Table (46): Per 1000 distribution of ailing persons among those who were medically treated but not as inpatient of hospital during last 15 days by type of payment made for availing some services for each category of specific medical service for each State/UT

| state/ut          | type of payment for services            |                   |             |            | total | Rural                                   |        |
|-------------------|-----------------------------------------|-------------------|-------------|------------|-------|-----------------------------------------|--------|
|                   | medical service not received / required | services received |             |            |       | number of persons with ailments treated |        |
|                   |                                         | free              | partly free | on payment |       | estd. no. (00)                          | sample |
| (1)               | (2)                                     | (3)               | (4)         | (5)        | (6)   | (7)                                     | (8)    |
| Andhra Pradesh    | 942                                     | 8                 | 1           | 48         | 1000  | 34316                                   | 1258   |
| Arunachal Pradesh | 880                                     | 20                | 33          | 67         | 1000  | 203                                     | 96     |
| Assam             | 943                                     | 2                 | 0           | 55         | 1000  | 12158                                   | 611    |
| Bihar             | 949                                     | 13                | 0           | 37         | 1000  | 23628                                   | 805    |
| Chhattisgarh      | 946                                     | 8                 | 0           | 46         | 1000  | 10735                                   | 377    |
| Delhi             | 1000                                    | 0                 | 0           | 0          | 1000  | 69                                      | 3      |
| Goa               | 1000                                    | 0                 | 0           | 0          | 1000  | 1504                                    | 35     |
| Gujarat           | 935                                     | 3                 | 2           | 60         | 1000  | 18147                                   | 540    |
| Haryana           | 952                                     | 1                 | 2           | 45         | 1000  | 12716                                   | 469    |
| Himachal Pradesh  | 913                                     | 3                 | 3           | 82         | 1000  | 4317                                    | 600    |
| Jammu & Kashmir   | 887                                     | 11                | 32          | 70         | 1000  | 3411                                    | 309    |
| Jharkhand         | 921                                     | 5                 | 0           | 73         | 1000  | 5434                                    | 205    |
| Karnataka         | 927                                     | 11                | 0           | 63         | 1000  | 16399                                   | 537    |
| Kerala            | 959                                     | 7                 | 5           | 29         | 1000  | 49598                                   | 1794   |
| Madhya Pradesh    | 964                                     | 6                 | 0           | 30         | 1000  | 23694                                   | 723    |
| Maharashtra       | 930                                     | 7                 | 0           | 63         | 1000  | 44416                                   | 1248   |
| Manipur           | 921                                     | 0                 | 15          | 63         | 1000  | 302                                     | 104    |
| Meghalaya         | 986                                     | 14                | 0           | 0          | 1000  | 295                                     | 55     |
| Mizoram           | 857                                     | 0                 | 0           | 143        | 1000  | 11                                      | 6      |
| Nagaland          | 968                                     | 0                 | 0           | 32         | 1000  | 222                                     | 67     |
| Orissa            | 969                                     | 8                 | 1           | 21         | 1000  | 17525                                   | 566    |
| Punjab            | 983                                     | 1                 | 2           | 14         | 1000  | 19786                                   | 599    |
| Rajasthan         | 923                                     | 3                 | 3           | 72         | 1000  | 20451                                   | 814    |
| Sikkim            | 974                                     | 18                | 0           | 9          | 1000  | 119                                     | 60     |
| Tamil Nadu        | 962                                     | 17                | 0           | 21         | 1000  | 29491                                   | 895    |
| Tripura           | 983                                     | 0                 | 3           | 14         | 1000  | 3074                                    | 448    |
| Uttaranchal       | 897                                     | 2                 | 0           | 101        | 1000  | 3051                                    | 105    |
| Uttar Pradesh     | 951                                     | 2                 | 1           | 46         | 1000  | 95398                                   | 3292   |
| West Bengal       | 946                                     | 5                 | 2           | 47         | 1000  | 48942                                   | 1371   |
| A & N Islands     | 957                                     | 43                | 0           | 0          | 1000  | 99                                      | 30     |
| Chandigarh        | 798                                     | 0                 | 0           | 202        | 1000  | 46                                      | 37     |
| Dadra & N. Haveli | 1000                                    | 0                 | 0           | 0          | 1000  | 32                                      | 12     |
| Daman & Diu       | 1000                                    | 0                 | 0           | 0          | 1000  | 18                                      | 13     |
| Lakshadweep       | 807                                     | 178               | 15          | 0          | 1000  | 20                                      | 44     |
| Pondicherry       | 922                                     | 0                 | 0           | 78         | 1000  | 244                                     | 31     |
| ONES              | 972                                     | 2                 | 5           | 20         | 1000  | 4225                                    | 836    |
| GUTs              | 921                                     | 17                | 1           | 62         | 1000  | 460                                     | 167    |
| all-India         | 948                                     | 6                 | 1           | 44         | 1000  | 499872                                  | 18159  |

Table (46): Per 1000 distribution of ailing persons among those who were medically treated but not as inpatient of hospital during last 15 days by type of payment made for availing some services for each category of specific medical service for each State/UT

| state/ut          | type of payment for services            |                   |             |            | total | Urban                                   |        |
|-------------------|-----------------------------------------|-------------------|-------------|------------|-------|-----------------------------------------|--------|
|                   | medical service not received / required | services received |             |            |       | number of persons with ailments treated |        |
|                   |                                         | free              | partly free | on payment |       | estd. no. (00)                          | sample |
| (1)               | (2)                                     | (3)               | (4)         | (5)        | (6)   | (7)                                     | (8)    |
| Andhra Pradesh    | 897                                     | 6                 | 0           | 97         | 1000  | 18538                                   | 967    |
| Arunachal Pradesh | 466                                     | 0                 | 0           | 534        | 1000  | 6                                       | 7      |
| Assam             | 891                                     | 12                | 0           | 97         | 1000  | 1656                                    | 154    |
| Bihar             | 932                                     | 2                 | 0           | 66         | 1000  | 3970                                    | 188    |
| Chhattisgarh      | 924                                     | 11                | 0           | 65         | 1000  | 1830                                    | 150    |
| Delhi             | 921                                     | 26                | 1           | 52         | 1000  | 1483                                    | 105    |
| Goa               | 992                                     | 8                 | 0           | 0          | 1000  | 431                                     | 43     |
| Gujarat           | 906                                     | 7                 | 2           | 85         | 1000  | 11437                                   | 558    |
| Haryana           | 967                                     | 2                 | 2           | 29         | 1000  | 3988                                    | 253    |
| Himachal Pradesh  | 930                                     | 36                | 11          | 23         | 1000  | 312                                     | 81     |
| Jammu & Kashmir   | 847                                     | 45                | 2           | 106        | 1000  | 998                                     | 151    |
| Jharkhand         | 860                                     | 28                | 0           | 111        | 1000  | 1694                                    | 121    |
| Karnataka         | 968                                     | 2                 | 1           | 29         | 1000  | 6748                                    | 515    |
| Kerala            | 965                                     | 1                 | 12          | 22         | 1000  | 17227                                   | 937    |
| Madhya Pradesh    | 938                                     | 4                 | 4           | 54         | 1000  | 8914                                    | 509    |
| Maharashtra       | 929                                     | 13                | 1           | 58         | 1000  | 39640                                   | 1465   |
| Manipur           | 887                                     | 0                 | 0           | 113        | 1000  | 108                                     | 58     |
| Meghalaya         | 893                                     | 21                | 0           | 86         | 1000  | 93                                      | 38     |
| Mizoram           | 969                                     | 0                 | 0           | 31         | 1000  | 14                                      | 24     |
| Nagaland          | 1000                                    | 0                 | 0           | 0          | 1000  | 125                                     | 34     |
| Orissa            | 892                                     | 32                | 0           | 76         | 1000  | 1737                                    | 139    |
| Punjab            | 936                                     | 1                 | 6           | 56         | 1000  | 7775                                    | 386    |
| Rajasthan         | 935                                     | 1                 | 0           | 64         | 1000  | 6804                                    | 477    |
| Sikkim            | 889                                     | 111               | 0           | 0          | 1000  | 5                                       | 10     |
| Tamil Nadu        | 942                                     | 11                | 0           | 47         | 1000  | 17788                                   | 1051   |
| Tripura           | 986                                     | 14                | 0           | 0          | 1000  | 234                                     | 69     |
| Uttaranchal       | 977                                     | 2                 | 0           | 21         | 1000  | 1045                                    | 95     |
| Uttar Pradesh     | 965                                     | 2                 | 2           | 32         | 1000  | 31389                                   | 1523   |
| West Bengal       | 933                                     | 11                | 1           | 55         | 1000  | 23254                                   | 1089   |
| A & N Islands     | 969                                     | 20                | 0           | 11         | 1000  | 59                                      | 34     |
| Chandigarh        | 965                                     | 12                | 0           | 24         | 1000  | 400                                     | 128    |
| Dadra & N. Haveli | 1000                                    | 0                 | 0           | 0          | 1000  | 7                                       | 7      |
| Daman & Diu       | 948                                     | 0                 | 0           | 52         | 1000  | 13                                      | 14     |
| Lakshadweep       | 971                                     | 16                | 0           | 13         | 1000  | 39                                      | 71     |
| Pondicherry       | 929                                     | 15                | 0           | 56         | 1000  | 810                                     | 115    |
| ONES              | 949                                     | 10                | 0           | 41         | 1000  | 586                                     | 240    |
| GUTs              | 943                                     | 14                | 0           | 43         | 1000  | 1328                                    | 369    |
| all-India         | 936                                     | 8                 | 2           | 54         | 1000  | 210571                                  | 11566  |

Table (46): Per 1000 distribution of ailing persons among those who were medically treated but not as inpatient of hospital during last 15 days by type of payment made for availing some services for each category of specific medical service for each State/UT

| state/ut          | type of payment for services            |                   |             |            | total | Rural + Urban                           |        |
|-------------------|-----------------------------------------|-------------------|-------------|------------|-------|-----------------------------------------|--------|
|                   | medical service not received / required | services received |             |            |       | number of persons with ailments treated |        |
|                   |                                         | free              | partly free | on payment |       | estd. no. (00)                          | sample |
| (1)               | (2)                                     | (3)               | (4)         | (5)        | (6)   | (7)                                     | (8)    |
| Andhra Pradesh    | 927                                     | 8                 | 1           | 65         | 1000  | 52854                                   | 2225   |
| Arunachal Pradesh | 867                                     | 20                | 32          | 81         | 1000  | 209                                     | 103    |
| Assam             | 937                                     | 3                 | 0           | 60         | 1000  | 13814                                   | 765    |
| Bihar             | 947                                     | 12                | 0           | 42         | 1000  | 27598                                   | 993    |
| Chhattisgarh      | 943                                     | 8                 | 0           | 49         | 1000  | 12566                                   | 527    |
| Delhi             | 924                                     | 25                | 1           | 50         | 1000  | 1552                                    | 108    |
| Goa               | 998                                     | 2                 | 0           | 0          | 1000  | 1935                                    | 78     |
| Gujarat           | 924                                     | 4                 | 2           | 70         | 1000  | 29585                                   | 1098   |
| Haryana           | 955                                     | 2                 | 2           | 41         | 1000  | 16704                                   | 722    |
| Himachal Pradesh  | 914                                     | 5                 | 3           | 78         | 1000  | 4629                                    | 681    |
| Jammu & Kashmir   | 878                                     | 18                | 25          | 78         | 1000  | 4409                                    | 460    |
| Jharkhand         | 907                                     | 11                | 0           | 82         | 1000  | 7128                                    | 326    |
| Karnataka         | 939                                     | 8                 | 0           | 53         | 1000  | 23147                                   | 1052   |
| Kerala            | 961                                     | 5                 | 7           | 27         | 1000  | 66825                                   | 2731   |
| Madhya Pradesh    | 957                                     | 6                 | 1           | 36         | 1000  | 32608                                   | 1232   |
| Maharashtra       | 930                                     | 10                | 1           | 60         | 1000  | 84056                                   | 2713   |
| Manipur           | 912                                     | 0                 | 11          | 76         | 1000  | 410                                     | 162    |
| Meghalaya         | 964                                     | 15                | 0           | 20         | 1000  | 388                                     | 93     |
| Mizoram           | 922                                     | 0                 | 0           | 78         | 1000  | 25                                      | 30     |
| Nagaland          | 979                                     | 0                 | 0           | 21         | 1000  | 347                                     | 101    |
| Orissa            | 962                                     | 10                | 1           | 26         | 1000  | 19262                                   | 705    |
| Punjab            | 970                                     | 1                 | 3           | 26         | 1000  | 27561                                   | 985    |
| Rajasthan         | 926                                     | 2                 | 2           | 70         | 1000  | 27255                                   | 1291   |
| Sikkim            | 970                                     | 21                | 0           | 9          | 1000  | 124                                     | 70     |
| Tamil Nadu        | 954                                     | 15                | 0           | 31         | 1000  | 47280                                   | 1946   |
| Tripura           | 983                                     | 1                 | 3           | 13         | 1000  | 3308                                    | 517    |
| Uttaranchal       | 918                                     | 2                 | 0           | 81         | 1000  | 4095                                    | 200    |
| Uttar Pradesh     | 954                                     | 2                 | 1           | 42         | 1000  | 126786                                  | 4815   |
| West Bengal       | 942                                     | 7                 | 2           | 50         | 1000  | 72195                                   | 2460   |
| A & N Islands     | 962                                     | 34                | 0           | 4          | 1000  | 159                                     | 64     |
| Chandigarh        | 947                                     | 10                | 0           | 42         | 1000  | 447                                     | 165    |
| Dadra & N. Haveli | 1000                                    | 0                 | 0           | 0          | 1000  | 39                                      | 19     |
| Daman & Diu       | 979                                     | 0                 | 0           | 21         | 1000  | 31                                      | 27     |
| Lakshadweep       | 915                                     | 72                | 5           | 9          | 1000  | 59                                      | 115    |
| Pondicherry       | 927                                     | 12                | 0           | 61         | 1000  | 1054                                    | 146    |
| ONES              | 970                                     | 3                 | 5           | 22         | 1000  | 4811                                    | 1076   |
| GUTs              | 937                                     | 15                | 0           | 47         | 1000  | 1789                                    | 536    |
| all-India         | 945                                     | 6                 | 2           | 47         | 1000  | 710443                                  | 29725  |



Table (46): Per 1000 distribution of ailing persons among those who were medically treated but not as inpatient of hospital during last 15 days by type of payment made for availing some services for each category of specific medical service for each State/UT

| state/ut          | type of payment for services            |                   |             |            | total | Rural                                   |        |
|-------------------|-----------------------------------------|-------------------|-------------|------------|-------|-----------------------------------------|--------|
|                   | medical service not received / required | services received |             |            |       | number of persons with ailments treated |        |
|                   |                                         | free              | partly free | on payment |       | estd. no. (00)                          | sample |
| (1)               | (2)                                     | (3)               | (4)         | (5)        | (6)   | (7)                                     | (8)    |
| Andhra Pradesh    | 886                                     | 13                | 1           | 100        | 1000  | 34311                                   | 1257   |
| Arunachal Pradesh | 655                                     | 212               | 20          | 113        | 1000  | 225                                     | 109    |
| Assam             | 862                                     | 5                 | 10          | 122        | 1000  | 12299                                   | 613    |
| Bihar             | 895                                     | 13                | 0           | 91         | 1000  | 23581                                   | 806    |
| Chhattisgarh      | 847                                     | 8                 | 0           | 145        | 1000  | 10735                                   | 377    |
| Delhi             | 1000                                    | 0                 | 0           | 0          | 1000  | 69                                      | 3      |
| Goa               | 1000                                    | 0                 | 0           | 0          | 1000  | 1504                                    | 35     |
| Gujarat           | 893                                     | 20                | 7           | 79         | 1000  | 18147                                   | 540    |
| Haryana           | 931                                     | 2                 | 1           | 66         | 1000  | 12716                                   | 469    |
| Himachal Pradesh  | 857                                     | 38                | 6           | 98         | 1000  | 4317                                    | 600    |
| Jammu & Kashmir   | 775                                     | 10                | 36          | 180        | 1000  | 3411                                    | 309    |
| Jharkhand         | 786                                     | 0                 | 17          | 196        | 1000  | 5361                                    | 200    |
| Karnataka         | 851                                     | 26                | 5           | 117        | 1000  | 16399                                   | 537    |
| Kerala            | 888                                     | 16                | 9           | 88         | 1000  | 49395                                   | 1788   |
| Madhya Pradesh    | 898                                     | 7                 | 2           | 93         | 1000  | 23691                                   | 722    |
| Maharashtra       | 848                                     | 21                | 6           | 125        | 1000  | 44307                                   | 1246   |
| Manipur           | 909                                     | 0                 | 17          | 74         | 1000  | 300                                     | 104    |
| Meghalaya         | 901                                     | 76                | 0           | 23         | 1000  | 295                                     | 55     |
| Mizoram           | 1000                                    | 0                 | 0           | 0          | 1000  | 11                                      | 6      |
| Nagaland          | 825                                     | 122               | 0           | 52         | 1000  | 222                                     | 67     |
| Orissa            | 849                                     | 26                | 0           | 125        | 1000  | 17518                                   | 565    |
| Punjab            | 959                                     | 5                 | 2           | 34         | 1000  | 19786                                   | 599    |
| Rajasthan         | 863                                     | 10                | 1           | 126        | 1000  | 20451                                   | 814    |
| Sikkim            | 927                                     | 10                | 0           | 63         | 1000  | 114                                     | 60     |
| Tamil Nadu        | 841                                     | 63                | 0           | 96         | 1000  | 29491                                   | 895    |
| Tripura           | 938                                     | 8                 | 2           | 52         | 1000  | 3064                                    | 446    |
| Uttaranchal       | 858                                     | 9                 | 0           | 133        | 1000  | 3051                                    | 105    |
| Uttar Pradesh     | 930                                     | 1                 | 1           | 68         | 1000  | 94987                                   | 3281   |
| West Bengal       | 923                                     | 5                 | 2           | 70         | 1000  | 48971                                   | 1371   |
| A & N Islands     | 817                                     | 183               | 0           | 0          | 1000  | 99                                      | 30     |
| Chandigarh        | 813                                     | 3                 | 0           | 183        | 1000  | 46                                      | 37     |
| Dadra & N. Haveli | 1000                                    | 0                 | 0           | 0          | 1000  | 32                                      | 12     |
| Daman & Diu       | 1000                                    | 0                 | 0           | 0          | 1000  | 18                                      | 13     |
| Lakshadweep       | 704                                     | 296               | 0           | 0          | 1000  | 20                                      | 44     |
| Pondicherry       | 613                                     | 203               | 0           | 184        | 1000  | 244                                     | 31     |
| ONES              | 912                                     | 29                | 4           | 55         | 1000  | 4230                                    | 847    |
| GUTs              | 724                                     | 160               | 0           | 116        | 1000  | 460                                     | 167    |
| all-India         | 891                                     | 14                | 3           | 92         | 1000  | 499190                                  | 18146  |



Table (46): Per 1000 distribution of ailing persons among those who were medically treated but not as inpatient of hospital during last 15 days by type of payment made for availing some services for each category of specific medical service for each State/UT

| medical service: other diagnostic tests |                                         |                   |             |            |       | Urban                                   |        |
|-----------------------------------------|-----------------------------------------|-------------------|-------------|------------|-------|-----------------------------------------|--------|
| state/ut                                | type of payment for services            |                   |             |            | total | number of persons with ailments treated |        |
|                                         | medical service not received / required | services received |             |            |       | estd. no. (00)                          | sample |
|                                         |                                         | free              | partly free | on payment |       |                                         |        |
| (1)                                     | (2)                                     | (3)               | (4)         | (5)        | (6)   | (7)                                     | (8)    |
| Andhra Pradesh                          | 818                                     | 16                | 0           | 165        | 1000  | 18711                                   | 970    |
| Arunachal Pradesh                       | 0                                       | 4                 | 7           | 989        | 1000  | 31                                      | 19     |
| Assam                                   | 723                                     | 14                | 59          | 204        | 1000  | 1659                                    | 154    |
| Bihar                                   | 917                                     | 1                 | 0           | 82         | 1000  | 3969                                    | 187    |
| Chhattisgarh                            | 864                                     | 14                | 12          | 111        | 1000  | 1825                                    | 149    |
| Delhi                                   | 789                                     | 64                | 1           | 146        | 1000  | 1483                                    | 105    |
| Goa                                     | 857                                     | 8                 | 2           | 133        | 1000  | 431                                     | 43     |
| Gujarat                                 | 847                                     | 9                 | 2           | 142        | 1000  | 11437                                   | 558    |
| Haryana                                 | 903                                     | 0                 | 3           | 94         | 1000  | 3988                                    | 253    |
| Himachal Pradesh                        | 813                                     | 152               | 7           | 28         | 1000  | 312                                     | 81     |
| Jammu & Kashmir                         | 646                                     | 23                | 3           | 328        | 1000  | 998                                     | 151    |
| Jharkhand                               | 843                                     | 21                | 0           | 136        | 1000  | 1662                                    | 120    |
| Karnataka                               | 839                                     | 6                 | 2           | 152        | 1000  | 6748                                    | 515    |
| Kerala                                  | 892                                     | 10                | 4           | 94         | 1000  | 17240                                   | 938    |
| Madhya Pradesh                          | 898                                     | 14                | 4           | 84         | 1000  | 8890                                    | 507    |
| Maharashtra                             | 878                                     | 11                | 11          | 100        | 1000  | 39630                                   | 1465   |
| Manipur                                 | 678                                     | 0                 | 0           | 322        | 1000  | 112                                     | 60     |
| Meghalaya                               | 863                                     | 21                | 0           | 116        | 1000  | 93                                      | 38     |
| Mizoram                                 | 647                                     | 0                 | 21          | 332        | 1000  | 17                                      | 23     |
| Nagaland                                | 853                                     | 96                | 0           | 51         | 1000  | 125                                     | 34     |
| Orissa                                  | 803                                     | 46                | 0           | 151        | 1000  | 1737                                    | 139    |
| Punjab                                  | 917                                     | 2                 | 7           | 73         | 1000  | 7775                                    | 386    |
| Rajasthan                               | 856                                     | 13                | 0           | 131        | 1000  | 6804                                    | 477    |
| Sikkim                                  | 799                                     | 28                | 111         | 63         | 1000  | 5                                       | 10     |
| Tamil Nadu                              | 827                                     | 58                | 3           | 111        | 1000  | 17788                                   | 1051   |
| Tripura                                 | 920                                     | 14                | 0           | 66         | 1000  | 234                                     | 69     |
| Uttaranchal                             | 911                                     | 13                | 0           | 76         | 1000  | 1045                                    | 95     |
| Uttar Pradesh                           | 901                                     | 15                | 3           | 81         | 1000  | 31306                                   | 1515   |
| West Bengal                             | 907                                     | 13                | 2           | 78         | 1000  | 23187                                   | 1088   |
| A & N Islands                           | 905                                     | 75                | 0           | 20         | 1000  | 59                                      | 34     |
| Chandigarh                              | 912                                     | 14                | 0           | 74         | 1000  | 400                                     | 128    |
| Dadra & N. Haveli                       | 745                                     | 0                 | 0           | 255        | 1000  | 7                                       | 7      |
| Daman & Diu                             | 656                                     | 0                 | 0           | 344        | 1000  | 13                                      | 14     |
| Lakshadweep                             | 753                                     | 234               | 0           | 13         | 1000  | 39                                      | 71     |
| Pondicherry                             | 796                                     | 105               | 0           | 99         | 1000  | 810                                     | 115    |
| ONES                                    | 799                                     | 28                | 2           | 170        | 1000  | 617                                     | 253    |
| GUTs                                    | 833                                     | 79                | 0           | 88         | 1000  | 1328                                    | 369    |
| all-India                               | 872                                     | 17                | 5           | 107        | 1000  | 210569                                  | 11569  |

Table (46): Per 1000 distribution of ailing persons among those who were medically treated but not as inpatient of hospital during last 15 days by type of payment made for availing some services for each category of specific medical service for each State/UT

| medical service: other diagnostic tests |                                         |                   |             |            | Rural + Urban |                                         |        |
|-----------------------------------------|-----------------------------------------|-------------------|-------------|------------|---------------|-----------------------------------------|--------|
| state/ut                                | type of payment for services            |                   |             |            | total         | number of persons with ailments treated |        |
|                                         | medical service not received / required | services received |             |            |               | estd. no. (00)                          | sample |
|                                         |                                         | free              | partly free | on payment |               |                                         |        |
| (1)                                     | (2)                                     | (3)               | (4)         | (5)        | (6)           | (7)                                     | (8)    |
| Andhra Pradesh                          | 862                                     | 14                | 1           | 123        | 1000          | 53021                                   | 2227   |
| Arunachal Pradesh                       | 576                                     | 187               | 19          | 218        | 1000          | 256                                     | 128    |
| Assam                                   | 846                                     | 6                 | 16          | 132        | 1000          | 13958                                   | 767    |
| Bihar                                   | 898                                     | 12                | 0           | 90         | 1000          | 27550                                   | 993    |
| Chhattisgarh                            | 850                                     | 9                 | 2           | 140        | 1000          | 12561                                   | 526    |
| Delhi                                   | 798                                     | 61                | 1           | 139        | 1000          | 1552                                    | 108    |
| Goa                                     | 968                                     | 2                 | 0           | 30         | 1000          | 1935                                    | 78     |
| Gujarat                                 | 875                                     | 16                | 5           | 103        | 1000          | 29585                                   | 1098   |
| Haryana                                 | 925                                     | 1                 | 1           | 73         | 1000          | 16704                                   | 722    |
| Himachal Pradesh                        | 854                                     | 46                | 6           | 94         | 1000          | 4629                                    | 681    |
| Jammu & Kashmir                         | 746                                     | 13                | 28          | 214        | 1000          | 4409                                    | 460    |
| Jharkhand                               | 800                                     | 5                 | 13          | 182        | 1000          | 7022                                    | 320    |
| Karnataka                               | 847                                     | 21                | 5           | 128        | 1000          | 23147                                   | 1052   |
| Kerala                                  | 889                                     | 14                | 7           | 90         | 1000          | 66635                                   | 2726   |
| Madhya Pradesh                          | 898                                     | 9                 | 2           | 91         | 1000          | 32581                                   | 1229   |
| Maharashtra                             | 862                                     | 16                | 8           | 113        | 1000          | 83937                                   | 2711   |
| Manipur                                 | 846                                     | 0                 | 12          | 142        | 1000          | 413                                     | 164    |
| Meghalaya                               | 892                                     | 63                | 0           | 45         | 1000          | 388                                     | 93     |
| Mizoram                                 | 785                                     | 0                 | 13          | 203        | 1000          | 27                                      | 29     |
| Nagaland                                | 835                                     | 113               | 0           | 52         | 1000          | 347                                     | 101    |
| Orissa                                  | 845                                     | 28                | 0           | 127        | 1000          | 19254                                   | 704    |
| Punjab                                  | 947                                     | 4                 | 3           | 45         | 1000          | 27561                                   | 985    |
| Rajasthan                               | 861                                     | 11                | 1           | 127        | 1000          | 27255                                   | 1291   |
| Sikkim                                  | 921                                     | 11                | 5           | 63         | 1000          | 119                                     | 70     |
| Tamil Nadu                              | 836                                     | 62                | 1           | 101        | 1000          | 47280                                   | 1946   |
| Tripura                                 | 937                                     | 8                 | 2           | 53         | 1000          | 3298                                    | 515    |
| Uttaranchal                             | 871                                     | 10                | 0           | 119        | 1000          | 4095                                    | 200    |
| Uttar Pradesh                           | 923                                     | 4                 | 1           | 71         | 1000          | 126293                                  | 4796   |
| West Bengal                             | 918                                     | 8                 | 2           | 72         | 1000          | 72158                                   | 2459   |
| A & N Islands                           | 850                                     | 143               | 0           | 8          | 1000          | 159                                     | 64     |
| Chandigarh                              | 902                                     | 13                | 0           | 85         | 1000          | 447                                     | 165    |
| Dadra & N. Haveli                       | 957                                     | 0                 | 0           | 43         | 1000          | 39                                      | 19     |
| Daman & Diu                             | 860                                     | 0                 | 0           | 140        | 1000          | 31                                      | 27     |
| Lakshadweep                             | 736                                     | 255               | 0           | 9          | 1000          | 59                                      | 115    |
| Pondicherry                             | 754                                     | 128               | 0           | 119        | 1000          | 1054                                    | 146    |
| ONES                                    | 898                                     | 29                | 4           | 70         | 1000          | 4847                                    | 1100   |
| GUTs                                    | 805                                     | 100               | 0           | 95         | 1000          | 1789                                    | 536    |
| all-India                               | 885                                     | 15                | 4           | 96         | 1000          | 709758                                  | 29715  |

1  
2  
3  
4  
5  
6  
7  
8  
9  
10  
11  
12  
13  
14  
15  
16  
17  
18  
19  
20  
21  
22  
23  
24  
25  
26  
27  
28  
29  
30  
31  
32  
33  
34  
35  
36  
37  
38  
39  
40  
41  
42  
43  
44  
45  
46  
47  
48  
49  
50  
51  
52  
53  
54  
55  
56  
57  
58  
59  
60

Table (47): Per 1000 distribution of total household expenditure incurred during the last 15 days in connection with treatment (other than as inpatient of hospital) by source of finance for each mpce class and social group

| all-India<br>mpce class /<br>social group | distn. of expenditure (Rs.) on treatment by source of<br>finance |                 |                                                          |                                                                                                                       |       | estd. total<br>expen-<br>diture<br>(000) for<br>treat-<br>ment | Rural<br>persons medically<br>treated during last 15<br>days |        |
|-------------------------------------------|------------------------------------------------------------------|-----------------|----------------------------------------------------------|-----------------------------------------------------------------------------------------------------------------------|-------|----------------------------------------------------------------|--------------------------------------------------------------|--------|
|                                           | house-<br>hold<br>income/<br>savings                             | borro-<br>wings | contri-<br>bution<br>from<br>friends<br>and<br>relatives | other<br>sources<br>(incl.sale<br>of<br>ornaments<br>and other<br>physical<br>assets,<br>draught<br>animals,<br>etc.) | total |                                                                | estd. no.<br>(00)                                            | sample |
|                                           |                                                                  |                 |                                                          |                                                                                                                       |       |                                                                |                                                              |        |
| 0 – 225                                   | 785                                                              | 134             | 48                                                       | 33                                                                                                                    | 1000  | 353528                                                         | 15647                                                        | 494    |
| 225 – 255                                 | 688                                                              | 214             | 80                                                       | 18                                                                                                                    | 1000  | 310049                                                         | 11493                                                        | 373    |
| 255 – 300                                 | 785                                                              | 176             | 23                                                       | 16                                                                                                                    | 1000  | 684787                                                         | 28799                                                        | 918    |
| 300 – 340                                 | 689                                                              | 262             | 28                                                       | 22                                                                                                                    | 1000  | 723704                                                         | 25889                                                        | 917    |
| 340 – 380                                 | 722                                                              | 164             | 91                                                       | 23                                                                                                                    | 1000  | 924428                                                         | 34654                                                        | 1165   |
| 380 – 420                                 | 725                                                              | 196             | 45                                                       | 35                                                                                                                    | 1000  | 1116262                                                        | 36042                                                        | 1285   |
| 420 – 470                                 | 740                                                              | 177             | 53                                                       | 30                                                                                                                    | 1000  | 1244302                                                        | 41610                                                        | 1444   |
| 470 – 525                                 | 684                                                              | 279             | 28                                                       | 10                                                                                                                    | 1000  | 1947329                                                        | 43918                                                        | 1596   |
| 525 – 615                                 | 806                                                              | 147             | 40                                                       | 7                                                                                                                     | 1000  | 1438726                                                        | 42540                                                        | 1645   |
| 615 – 775                                 | 865                                                              | 106             | 25                                                       | 5                                                                                                                     | 1000  | 1890425                                                        | 50330                                                        | 2039   |
| 775 – 950                                 | 869                                                              | 116             | 14                                                       | 1                                                                                                                     | 1000  | 1183309                                                        | 28874                                                        | 1129   |
| 950 +                                     | 794                                                              | 136             | 62                                                       | 8                                                                                                                     | 1000  | 1954718                                                        | 35527                                                        | 1473   |
| all                                       | 772                                                              | 172             | 42                                                       | 14                                                                                                                    | 1000  | 13771566                                                       | 395324                                                       | 14478  |
| <u>social -group</u>                      |                                                                  |                 |                                                          |                                                                                                                       |       |                                                                |                                                              |        |
| SC                                        | 772                                                              | 166             | 36                                                       | 25                                                                                                                    | 1000  | 573101                                                         | 26793                                                        | 1283   |
| ST                                        | 736                                                              | 202             | 50                                                       | 12                                                                                                                    | 1000  | 2440088                                                        | 84121                                                        | 2818   |
| OBC                                       | 781                                                              | 164             | 38                                                       | 16                                                                                                                    | 1000  | 5723570                                                        | 164993                                                       | 5901   |
| others                                    | 778                                                              | 168             | 42                                                       | 12                                                                                                                    | 1000  | 5027723                                                        | 119326                                                       | 4473   |
| n.r.                                      | 1000                                                             | 0               | 0                                                        | 0                                                                                                                     | 1000  | 7085                                                           | 91                                                           | 3      |
| all                                       | 772                                                              | 172             | 42                                                       | 14                                                                                                                    | 1000  | 13771566                                                       | 395324                                                       | 14478  |

Table (47): Per 1000 distribution of total household expenditure incurred during the last 15 days in connection with treatment (other than as inpatient of hospital) by source of finance for each mpce class and social group

| all-India                    |                                                                  |                 |                                                          |                                                                                                                       |       |                                                                | Urban                                               |        |
|------------------------------|------------------------------------------------------------------|-----------------|----------------------------------------------------------|-----------------------------------------------------------------------------------------------------------------------|-------|----------------------------------------------------------------|-----------------------------------------------------|--------|
| mpce class /<br>social group | distn. of expenditure (Rs.) on treatment by source of<br>finance |                 |                                                          |                                                                                                                       |       | estd. total<br>expen-<br>diture<br>(000) for<br>treat-<br>ment | persons medically<br>treated during last 15<br>days |        |
|                              | house-<br>hold<br>income/<br>savings                             | borro-<br>wings | contri-<br>bution<br>from<br>friends<br>and<br>relatives | other<br>sources<br>(incl.sale<br>of<br>ornaments<br>and other<br>physical<br>assets,<br>draught<br>animals,<br>etc.) | total |                                                                | estd. no.<br>(00)                                   | sample |
| (1)                          | (2)                                                              | (3)             | (4)                                                      | (5)                                                                                                                   | (6)   | (7)                                                            | (8)                                                 | (9)    |
| 0 – 300                      | 717                                                              | 244             | 39                                                       | 0                                                                                                                     | 1000  | 99464                                                          | 3776                                                | 185    |
| 300 – 350                    | 778                                                              | 127             | 96                                                       | 0                                                                                                                     | 1000  | 117792                                                         | 3596                                                | 165    |
| 350 – 425                    | 820                                                              | 147             | 31                                                       | 2                                                                                                                     | 1000  | 208926                                                         | 8266                                                | 458    |
| 425 – 500                    | 732                                                              | 201             | 61                                                       | 7                                                                                                                     | 1000  | 501101                                                         | 15836                                               | 876    |
| 500 – 575                    | 851                                                              | 116             | 28                                                       | 5                                                                                                                     | 1000  | 244017                                                         | 7836                                                | 451    |
| 575 – 665                    | 856                                                              | 125             | 15                                                       | 4                                                                                                                     | 1000  | 383118                                                         | 12402                                               | 710    |
| 665 – 775                    | 843                                                              | 99              | 26                                                       | 32                                                                                                                    | 1000  | 606923                                                         | 18622                                               | 1017   |
| 775 – 915                    | 932                                                              | 38              | 14                                                       | 15                                                                                                                    | 1000  | 645158                                                         | 16661                                               | 1011   |
| 915 – 1120                   | 911                                                              | 47              | 32                                                       | 10                                                                                                                    | 1000  | 736651                                                         | 22234                                               | 1221   |
| 1120 – 1500                  | 871                                                              | 60              | 29                                                       | 40                                                                                                                    | 1000  | 1253445                                                        | 24903                                               | 1366   |
| 1500 – 1925                  | 964                                                              | 12              | 21                                                       | 3                                                                                                                     | 1000  | 291118                                                         | 7239                                                | 455    |
| 1925 +                       | 862                                                              | 11              | 123                                                      | 4                                                                                                                     | 1000  | 1186002                                                        | 18822                                               | 883    |
| all                          | 865                                                              | 71              | 48                                                       | 16                                                                                                                    | 1000  | 6273716                                                        | 160193                                              | 8798   |
| <u>social -group</u>         |                                                                  |                 |                                                          |                                                                                                                       |       |                                                                |                                                     |        |
| SC                           | 805                                                              | 74              | 42                                                       | 80                                                                                                                    | 1000  | 71222                                                          | 2742                                                | 325    |
| ST                           | 878                                                              | 99              | 21                                                       | 3                                                                                                                     | 1000  | 764931                                                         | 21958                                               | 1143   |
| OBC                          | 827                                                              | 136             | 25                                                       | 12                                                                                                                    | 1000  | 1766430                                                        | 53461                                               | 3031   |
| others                       | 881                                                              | 35              | 65                                                       | 19                                                                                                                    | 1000  | 3670783                                                        | 82022                                               | 4297   |
| n.r.                         | 1000                                                             | 0               | 0                                                        | 0                                                                                                                     | 1000  | 350                                                            | 10                                                  | 2      |
| all                          | 865                                                              | 71              | 48                                                       | 16                                                                                                                    | 1000  | 6273716                                                        | 160193                                              | 8798   |

Table (47): Per 1000 distribution of total household expenditure incurred during the last 15 days in connection with treatment (other than as inpatient of hospital) by source of finance for each mpce class and social group

| all-India                    |                                                                  |                 |                                                          |                                                                                                                       |       | Rural + Urban                                                  |                                                     |        |
|------------------------------|------------------------------------------------------------------|-----------------|----------------------------------------------------------|-----------------------------------------------------------------------------------------------------------------------|-------|----------------------------------------------------------------|-----------------------------------------------------|--------|
| mpce class /<br>social group | distn. of expenditure (Rs.) on treatment by source of<br>finance |                 |                                                          |                                                                                                                       |       | estd. total<br>expen-<br>diture<br>(000) for<br>treat-<br>ment | persons medically<br>treated during last 15<br>days |        |
|                              | house-<br>hold<br>income/<br>savings                             | borro-<br>wings | contri-<br>bution<br>from<br>friends<br>and<br>relatives | other<br>sources<br>(incl.sale<br>of<br>ornaments<br>and other<br>physical<br>assets,<br>draught<br>animals,<br>etc.) | total |                                                                | estd. no.<br>(00)                                   | sample |
| (1)                          | (2)                                                              | (3)             | (4)                                                      | (5)                                                                                                                   | (6)   | (7)                                                            | (8)                                                 | (9)    |
| 0 – 235                      | 771                                                              | 157             | 46                                                       | 26                                                                                                                    | 1000  | 452992                                                         | 19423                                               | 679    |
| 235 – 265                    | 712                                                              | 190             | 84                                                       | 13                                                                                                                    | 1000  | 427841                                                         | 15089                                               | 538    |
| 265 – 320                    | 793                                                              | 170             | 25                                                       | 13                                                                                                                    | 1000  | 893713                                                         | 37065                                               | 1376   |
| 320 – 365                    | 706                                                              | 237             | 41                                                       | 16                                                                                                                    | 1000  | 1224805                                                        | 41725                                               | 1793   |
| 365 – 410                    | 749                                                              | 154             | 78                                                       | 19                                                                                                                    | 1000  | 1168445                                                        | 42490                                               | 1616   |
| 410 – 460                    | 759                                                              | 177             | 37                                                       | 27                                                                                                                    | 1000  | 1499380                                                        | 48444                                               | 1995   |
| 460 – 520                    | 775                                                              | 151             | 44                                                       | 31                                                                                                                    | 1000  | 1851225                                                        | 60232                                               | 2461   |
| 520 – 605                    | 751                                                              | 213             | 24                                                       | 11                                                                                                                    | 1000  | 2592488                                                        | 60579                                               | 2607   |
| 605 – 730                    | 842                                                              | 112             | 37                                                       | 8                                                                                                                     | 1000  | 2175377                                                        | 64774                                               | 2866   |
| 730 – 980                    | 867                                                              | 87              | 27                                                       | 19                                                                                                                    | 1000  | 3143870                                                        | 75233                                               | 3405   |
| 980 – 1285                   | 888                                                              | 95              | 15                                                       | 2                                                                                                                     | 1000  | 1474427                                                        | 36113                                               | 1584   |
| 1285 +                       | 821                                                              | 87              | 86                                                       | 6                                                                                                                     | 1000  | 3140720                                                        | 54349                                               | 2356   |
| all                          | 802                                                              | 140             | 44                                                       | 15                                                                                                                    | 1000  | 20045282                                                       | 555517                                              | 23276  |
| <b>social -group</b>         |                                                                  |                 |                                                          |                                                                                                                       |       |                                                                |                                                     |        |
| SC                           | 776                                                              | 156             | 37                                                       | 32                                                                                                                    | 1000  | 644323                                                         | 29535                                               | 1608   |
| ST                           | 771                                                              | 177             | 43                                                       | 9                                                                                                                     | 1000  | 3205019                                                        | 106078                                              | 3961   |
| OBC                          | 792                                                              | 157             | 35                                                       | 15                                                                                                                    | 1000  | 7490000                                                        | 218454                                              | 8932   |
| others                       | 822                                                              | 111             | 52                                                       | 15                                                                                                                    | 1000  | 8698506                                                        | 201348                                              | 8770   |
| n.r.                         | 1000                                                             | 0               | 0                                                        | 0                                                                                                                     | 1000  | 7434                                                           | 101                                                 | 5      |
| all                          | 802                                                              | 140             | 44                                                       | 15                                                                                                                    | 1000  | 20045282                                                       | 555517                                              | 23276  |

Table (48): Number per 1000 of treated persons getting reimbursement for treatment and per 1000 distribution of total amount of reimbursement by source of reimbursement for each sex, mpce class and social-group

| all-India                       |                                               |                                                                                                 |         |                             |                |       | Rural                                   |                                       |        |
|---------------------------------|-----------------------------------------------|-------------------------------------------------------------------------------------------------|---------|-----------------------------|----------------|-------|-----------------------------------------|---------------------------------------|--------|
| mpce class (Rs.) / social group | no. per 1000 of persons getting reimbursement | reimbursement of total expenses (Rs.) incurred on treatment during last 15 days receivable from |         |                             |                |       | estd. total amt. of reimbursement (000) | treated persons getting reimbursement |        |
|                                 |                                               | employer                                                                                        |         | medical insurance companies | other agencies | total |                                         | estd. no. (00)                        | sample |
|                                 |                                               | government                                                                                      | private |                             |                |       |                                         |                                       |        |
| (1)                             | (2)                                           | (3)                                                                                             | (4)     | (5)                         | (6)            | (7)   | (8)                                     | (9)                                   | (10)   |
| males                           |                                               |                                                                                                 |         |                             |                |       |                                         |                                       |        |
| mpce class                      |                                               |                                                                                                 |         |                             |                |       |                                         |                                       |        |
| 0 – 225                         | 0                                             | 0                                                                                               | 0       | 0                           | 0              | 0     | 0                                       | 0                                     | 0      |
| 225 – 255                       | 0                                             | 0                                                                                               | 0       | 0                           | 0              | 0     | 0                                       | 0                                     | 0      |
| 255 – 300                       | 7                                             | 250                                                                                             | 250     | 250                         | 250            | 1000  | 13218                                   | 121                                   | 2      |
| 300 – 340                       | 0                                             | 0                                                                                               | 0       | 0                           | 0              | 0     | 0                                       | 0                                     | 0      |
| 340 – 380                       | 2                                             | 0                                                                                               | 1000    | 0                           | 0              | 1000  | 1961                                    | 34                                    | 2      |
| 380 – 420                       | 1                                             | 638                                                                                             | 0       | 0                           | 362            | 1000  | 74                                      | 12                                    | 2      |
| 420 – 470                       | 2                                             | 840                                                                                             | 53      | 53                          | 53             | 1000  | 178                                     | 52                                    | 2      |
| 470 – 525                       | 0                                             | 1000                                                                                            | 0       | 0                           | 0              | 1000  | 832                                     | 6                                     | 1      |
| 525 – 615                       | 0                                             | 0                                                                                               | 0       | 0                           | 0              | 0     | 0                                       | 0                                     | 0      |
| 615 – 775                       | 3                                             | 846                                                                                             | 41      | 0                           | 112            | 1000  | 1553                                    | 100                                   | 4      |
| 775 – 950                       | 3                                             | 1000                                                                                            | 0       | 0                           | 0              | 1000  | 6515                                    | 53                                    | 3      |
| 950 +                           | 6                                             | 999                                                                                             | 1       | 0                           | 0              | 1000  | 4835                                    | 129                                   | 7      |
| all                             | 2                                             | 583                                                                                             | 183     | 114                         | 121            | 1000  | 29166                                   | 507                                   | 23     |
| social -                        |                                               |                                                                                                 |         |                             |                |       |                                         |                                       |        |
| group                           |                                               |                                                                                                 |         |                             |                |       |                                         |                                       |        |
| SC                              | 2                                             | 962                                                                                             | 38      | 0                           | 0              | 1000  | 2403                                    | 32                                    | 3      |
| ST                              | 0                                             | 1000                                                                                            | 0       | 0                           | 0              | 1000  | 120                                     | 8                                     | 1      |
| OBC                             | 2                                             | 498                                                                                             | 220     | 137                         | 145            | 1000  | 23269                                   | 245                                   | 12     |
| others                          | 3                                             | 880                                                                                             | 37      | 37                          | 45             | 1000  | 3374                                    | 223                                   | 7      |
| all                             | 2                                             | 583                                                                                             | 183     | 114                         | 121            | 1000  | 29166                                   | 507                                   | 23     |
| females                         |                                               |                                                                                                 |         |                             |                |       |                                         |                                       |        |
| mpce class                      |                                               |                                                                                                 |         |                             |                |       |                                         |                                       |        |
| 0 – 225                         | 0                                             | 0                                                                                               | 0       | 0                           | 0              | 0     | 0                                       | 0                                     | 0      |
| 225 – 255                       | 0                                             | 0                                                                                               | 0       | 0                           | 0              | 0     | 0                                       | 0                                     | 0      |
| 255 – 300                       | 1                                             | 250                                                                                             | 250     | 250                         | 250            | 1000  | 736                                     | 18                                    | 1      |
| 300 – 340                       | 0                                             | 0                                                                                               | 0       | 0                           | 0              | 0     | 0                                       | 0                                     | 0      |
| 340 – 380                       | 1                                             | 0                                                                                               | 500     | 0                           | 500            | 1000  | 56                                      | 28                                    | 1      |
| 380 – 420                       | 5                                             | 204                                                                                             | 174     | 174                         | 449            | 1000  | 2140                                    | 106                                   | 5      |
| 420 – 470                       | 1                                             | 97                                                                                              | 593     | 97                          | 214            | 1000  | 261                                     | 27                                    | 4      |
| 470 – 525                       | 0                                             | 45                                                                                              | 955     | 0                           | 0              | 1000  | 85                                      | 14                                    | 2      |
| 525 – 615                       | 2                                             | 250                                                                                             | 250     | 250                         | 250            | 1000  | 10552                                   | 59                                    | 2      |
| 615 – 775                       | 2                                             | 491                                                                                             | 14      | 14                          | 482            | 1000  | 1549                                    | 56                                    | 7      |
| 775 – 950                       | 6                                             | 934                                                                                             | 22      | 22                          | 22             | 1000  | 2358                                    | 128                                   | 5      |
| 950 +                           | 2                                             | 995                                                                                             | 0       | 0                           | 5              | 1000  | 3066                                    | 57                                    | 4      |
| all                             | 2                                             | 447                                                                                             | 170     | 158                         | 225            | 1000  | 20803                                   | 495                                   | 31     |

Continued

Table (48): Number per 1000 of treated persons getting reimbursement for treatment and per 1000 distribution of total amount of reimbursement by source of reimbursement for each sex, mpce class and social-group

| all-India                       |                                               |                                                                                                 |         |                             |                |                                         | Rural                                 |                |        |
|---------------------------------|-----------------------------------------------|-------------------------------------------------------------------------------------------------|---------|-----------------------------|----------------|-----------------------------------------|---------------------------------------|----------------|--------|
| mpce class (Rs.) / social group | no. per 1000 of persons getting reimbursement | reimbursement of total expenses (Rs.) incurred on treatment during last 15 days receivable from |         |                             |                | estd. total amt. of reimbursement (000) | treated persons getting reimbursement |                |        |
|                                 |                                               | employer                                                                                        |         | medical insurance companies | other agencies |                                         | total                                 | estd. no. (00) | sample |
|                                 |                                               | government                                                                                      | private |                             |                |                                         |                                       |                |        |
| (1)                             | (2)                                           | (3)                                                                                             | (4)     | (5)                         | (6)            | (7)                                     | (8)                                   | (9)            | (10)   |
| females                         |                                               |                                                                                                 |         |                             |                |                                         |                                       |                |        |
| social - group                  |                                               |                                                                                                 |         |                             |                |                                         |                                       |                |        |
| SC                              | 1                                             | 0                                                                                               | 1000    | 0                           | 0              | 1000                                    | 81                                    | 14             | 1      |
| ST                              | 2                                             | 423                                                                                             | 188     | 188                         | 200            | 1000                                    | 14659                                 | 127            | 9      |
| OBC                             | 2                                             | 451                                                                                             | 121     | 121                         | 307            | 1000                                    | 3459                                  | 164            | 9      |
| others                          | 2                                             | 591                                                                                             | 104     | 43                          | 262            | 1000                                    | 2604                                  | 191            | 12     |
| all                             | 2                                             | 447                                                                                             | 170     | 158                         | 225            | 1000                                    | 20803                                 | 495            | 31     |
| persons                         |                                               |                                                                                                 |         |                             |                |                                         |                                       |                |        |
| mpce class                      |                                               |                                                                                                 |         |                             |                |                                         |                                       |                |        |
| 0 - 225                         | 0                                             | 0                                                                                               | 0       | 0                           | 0              | 0                                       | 0                                     | 0              | 0      |
| 225 - 255                       | 0                                             | 0                                                                                               | 0       | 0                           | 0              | 0                                       | 0                                     | 0              | 0      |
| 255 - 300                       | 4                                             | 250                                                                                             | 250     | 250                         | 250            | 1000                                    | 13954                                 | 139            | 3      |
| 300 - 340                       | 0                                             | 0                                                                                               | 0       | 0                           | 0              | 0                                       | 0                                     | 0              | 0      |
| 340 - 380                       | 1                                             | 0                                                                                               | 986     | 0                           | 14             | 1000                                    | 2017                                  | 62             | 3      |
| 380 - 420                       | 3                                             | 218                                                                                             | 168     | 168                         | 446            | 1000                                    | 2214                                  | 118            | 7      |
| 420 - 470                       | 2                                             | 398                                                                                             | 374     | 79                          | 149            | 1000                                    | 439                                   | 79             | 6      |
| 470 - 525                       | 0                                             | 911                                                                                             | 89      | 0                           | 0              | 1000                                    | 917                                   | 20             | 3      |
| 525 - 615                       | 1                                             | 250                                                                                             | 250     | 250                         | 250            | 1000                                    | 10552                                 | 59             | 2      |
| 615 - 775                       | 2                                             | 669                                                                                             | 27      | 7                           | 297            | 1000                                    | 3102                                  | 156            | 11     |
| 775 - 950                       | 5                                             | 983                                                                                             | 6       | 6                           | 6              | 1000                                    | 8873                                  | 182            | 8      |
| 950 +                           | 4                                             | 997                                                                                             | 1       | 0                           | 2              | 1000                                    | 7900                                  | 186            | 11     |
| all                             | 2                                             | 526                                                                                             | 178     | 132                         | 164            | 1000                                    | 49969                                 | 1002           | 54     |
| social - group                  |                                               |                                                                                                 |         |                             |                |                                         |                                       |                |        |
| SC                              | 1                                             | 931                                                                                             | 69      | 0                           | 0              | 1000                                    | 2485                                  | 45             | 4      |
| ST                              | 1                                             | 428                                                                                             | 187     | 187                         | 199            | 1000                                    | 14778                                 | 134            | 10     |
| OBC                             | 2                                             | 492                                                                                             | 207     | 135                         | 166            | 1000                                    | 26728                                 | 409            | 21     |
| others                          | 3                                             | 754                                                                                             | 66      | 40                          | 140            | 1000                                    | 5978                                  | 413            | 19     |
| all                             | 2                                             | 526                                                                                             | 178     | 132                         | 164            | 1000                                    | 49969                                 | 1002           | 54     |

Table (48): Number per 1000 of treated persons getting reimbursement for treatment and per 1000 distribution of total amount of reimbursement by source of reimbursement for each sex, mpce class and social-group

| all-India                       |                                               |                                                                                                 |         |                             |                |                                         | Urban                                 |                |        |
|---------------------------------|-----------------------------------------------|-------------------------------------------------------------------------------------------------|---------|-----------------------------|----------------|-----------------------------------------|---------------------------------------|----------------|--------|
| mpce class (Rs.) / social group | no. per 1000 of persons getting reimbursement | reimbursement of total expenses (Rs.) incurred on treatment during last 15 days receivable from |         |                             |                | estd. total amt. of reimbursement (000) | treated persons getting reimbursement |                |        |
|                                 |                                               | employer                                                                                        |         | medical insurance companies | other agencies |                                         | total                                 | estd. no. (00) | sample |
|                                 |                                               | government                                                                                      | private |                             |                |                                         |                                       |                |        |
| (1)                             | (2)                                           | (3)                                                                                             | (4)     | (5)                         | (6)            | (7)                                     | (8)                                   | (9)            | (10)   |
| males                           |                                               |                                                                                                 |         |                             |                |                                         |                                       |                |        |
| mpce class                      |                                               |                                                                                                 |         |                             |                |                                         |                                       |                |        |
| 0-300                           | 0                                             | 0                                                                                               | 0       | 0                           | 0              | 0                                       | 0                                     | 0              | 0      |
| 300-350                         | 0                                             | 0                                                                                               | 0       | 0                           | 0              | 0                                       | 0                                     | 0              | 0      |
| 350-425                         | 0                                             | 0                                                                                               | 0       | 0                           | 0              | 0                                       | 0                                     | 0              | 0      |
| 425-500                         | 10                                            | 0                                                                                               | 1000    | 0                           | 0              | 1000                                    | 1046                                  | 95             | 1      |
| 500-575                         | 0                                             | 1000                                                                                            | 0       | 0                           | 0              | 1000                                    | 11                                    | 0              | 1      |
| 575-665                         | 0                                             | 0                                                                                               | 0       | 0                           | 0              | 0                                       | 0                                     | 0              | 0      |
| 665-775                         | 1                                             | 929                                                                                             | 24      | 24                          | 24             | 1000                                    | 183                                   | 9              | 3      |
| 775-915                         | 21                                            | 967                                                                                             | 30      | 1                           | 1              | 1000                                    | 5176                                  | 207            | 10     |
| 915-1120                        | 9                                             | 999                                                                                             | 0       | 0                           | 0              | 1000                                    | 3379                                  | 115            | 6      |
| 1120-1500                       | 8                                             | 272                                                                                             | 435     | 146                         | 146            | 1000                                    | 5723                                  | 128            | 8      |
| 1500-1925                       | 19                                            | 441                                                                                             | 253     | 306                         | 0              | 1000                                    | 4650                                  | 82             | 7      |
| 1925+                           | 21                                            | 391                                                                                             | 116     | 6                           | 487            | 1000                                    | 8752                                  | 223            | 17     |
| all                             | 9                                             | 539                                                                                             | 204     | 81                          | 177            | 1000                                    | 28920                                 | 860            | 53     |
| social -group                   |                                               |                                                                                                 |         |                             |                |                                         |                                       |                |        |
| SC                              | 12                                            | 990                                                                                             | 3       | 3                           | 3              | 1000                                    | 216                                   | 18             | 5      |
| ST                              | 3                                             | 248                                                                                             | 0       | 0                           | 752            | 1000                                    | 5669                                  | 42             | 8      |
| OBC                             | 9                                             | 500                                                                                             | 223     | 257                         | 19             | 1000                                    | 5985                                  | 296            | 12     |
| others                          | 10                                            | 644                                                                                             | 267     | 46                          | 43             | 1000                                    | 17050                                 | 504            | 28     |
| all                             | 9                                             | 539                                                                                             | 204     | 81                          | 177            | 1000                                    | 28920                                 | 860            | 53     |
| females                         |                                               |                                                                                                 |         |                             |                |                                         |                                       |                |        |
| mpce class                      |                                               |                                                                                                 |         |                             |                |                                         |                                       |                |        |
| 0-300                           | 0                                             | 0                                                                                               | 0       | 0                           | 0              | 0                                       | 0                                     | 0              | 0      |
| 300-350                         | 0                                             | 0                                                                                               | 0       | 0                           | 0              | 0                                       | 0                                     | 0              | 0      |
| 350-425                         | 0                                             | 0                                                                                               | 0       | 0                           | 0              | 0                                       | 0                                     | 0              | 0      |
| 425-500                         | 1                                             | 1000                                                                                            | 0       | 0                           | 0              | 1000                                    | 6                                     | 6              | 1      |
| 500-575                         | 3                                             | 0                                                                                               | 0       | 0                           | 1000           | 1000                                    | 923                                   | 15             | 1      |
| 575-665                         | 1                                             | 0                                                                                               | 0       | 0                           | 1000           | 1000                                    | 44                                    | 7              | 1      |
| 665-775                         | 1                                             | 566                                                                                             | 0       | 0                           | 434            | 1000                                    | 865                                   | 13             | 3      |
| 775-915                         | 16                                            | 796                                                                                             | 204     | 0                           | 0              | 1000                                    | 23450                                 | 167            | 4      |
| 915-1120                        | 2                                             | 385                                                                                             | 573     | 0                           | 42             | 1000                                    | 417                                   | 22             | 5      |
| 1120-1500                       | 13                                            | 530                                                                                             | 445     | 0                           | 25             | 1000                                    | 11718                                 | 206            | 16     |
| 1500-1925                       | 18                                            | 771                                                                                             | 229     | 0                           | 0              | 1000                                    | 3081                                  | 83             | 8      |
| 1925+                           | 19                                            | 896                                                                                             | 102     | 1                           | 1              | 1000                                    | 31952                                 | 235            | 12     |
| all                             | 7                                             | 781                                                                                             | 196     | 0                           | 23             | 1000                                    | 72456                                 | 755            | 51     |

Continued



Table (48): Number per 1000 of treated persons getting reimbursement for treatment and per 1000 distribution of total amount of reimbursement by source of reimbursement for each sex, mpce class and social-group

| all-India                       |                                               |                                                                                                 |         |                             |                |                                         | Urban                                 |                |        |
|---------------------------------|-----------------------------------------------|-------------------------------------------------------------------------------------------------|---------|-----------------------------|----------------|-----------------------------------------|---------------------------------------|----------------|--------|
| mpce class (Rs.) / social group | no. per 1000 of persons getting reimbursement | reimbursement of total expenses (Rs.) incurred on treatment during last 15 days receivable from |         |                             |                | estd. total amt. of reimbursement (000) | treated persons getting reimbursement |                |        |
|                                 |                                               | employer                                                                                        |         | medical insurance companies | other agencies |                                         | total                                 | estd. no. (00) | sample |
|                                 |                                               | government                                                                                      | private |                             |                |                                         |                                       |                |        |
| (1)                             | (2)                                           | (3)                                                                                             | (4)     | (5)                         | (6)            | (7)                                     | (8)                                   | (9)            | (10)   |
| social -group                   |                                               |                                                                                                 |         |                             | females        |                                         |                                       |                |        |
| SC                              | 0                                             | 1000                                                                                            | 0       | 0                           | 0              | 1000                                    | 37                                    | 0              | 1      |
| ST                              | 2                                             | 1000                                                                                            | 0       | 0                           | 0              | 1000                                    | 2180                                  | 27             | 4      |
| OBC                             | 3                                             | 806                                                                                             | 111     | 6                           | 77             | 1000                                    | 5242                                  | 118            | 13     |
| others                          | 11                                            | 771                                                                                             | 209     | 0                           | 20             | 1000                                    | 64997                                 | 611            | 33     |
| all                             | 7                                             | 781                                                                                             | 196     | 0                           | 23             | 1000                                    | 72456                                 | 755            | 51     |
|                                 |                                               |                                                                                                 |         |                             | persons        |                                         |                                       |                |        |
| mpce class                      |                                               |                                                                                                 |         |                             |                |                                         |                                       |                |        |
| 0-300                           | 0                                             | 0                                                                                               | 0       | 0                           | 0              | 0                                       | 0                                     | 0              | 0      |
| 300-350                         | 0                                             | 0                                                                                               | 0       | 0                           | 0              | 0                                       | 0                                     | 0              | 0      |
| 350-425                         | 0                                             | 0                                                                                               | 0       | 0                           | 0              | 0                                       | 0                                     | 0              | 0      |
| 425-500                         | 5                                             | 6                                                                                               | 994     | 0                           | 0              | 1000                                    | 1052                                  | 101            | 2      |
| 500-575                         | 1                                             | 12                                                                                              | 0       | 0                           | 988            | 1000                                    | 934                                   | 15             | 2      |
| 575-665                         | 0                                             | 0                                                                                               | 0       | 0                           | 1000           | 1000                                    | 44                                    | 7              | 1      |
| 665-775                         | 1                                             | 629                                                                                             | 4       | 4                           | 362            | 1000                                    | 1048                                  | 22             | 6      |
| 775-915                         | 18                                            | 827                                                                                             | 172     | 0                           | 0              | 1000                                    | 28626                                 | 375            | 14     |
| 915-1120                        | 5                                             | 932                                                                                             | 63      | 0                           | 5              | 1000                                    | 3797                                  | 137            | 11     |
| 1120-1500                       | 10                                            | 446                                                                                             | 441     | 48                          | 65             | 1000                                    | 17441                                 | 334            | 24     |
| 1500-1925                       | 19                                            | 573                                                                                             | 243     | 184                         | 0              | 1000                                    | 7731                                  | 165            | 15     |
| 1925+                           | 20                                            | 788                                                                                             | 105     | 2                           | 105            | 1000                                    | 40704                                 | 458            | 29     |
| all                             | 8                                             | 712                                                                                             | 198     | 23                          | 67             | 1000                                    | 101375                                | 1616           | 104    |
| social -group                   |                                               |                                                                                                 |         |                             |                |                                         |                                       |                |        |
| SC                              | 6                                             | 991                                                                                             | 3       | 3                           | 3              | 1000                                    | 253                                   | 18             | 6      |
| ST                              | 3                                             | 457                                                                                             | 0       | 0                           | 543            | 1000                                    | 7849                                  | 68             | 12     |
| OBC                             | 6                                             | 643                                                                                             | 171     | 140                         | 46             | 1000                                    | 11227                                 | 414            | 25     |
| others                          | 11                                            | 745                                                                                             | 221     | 10                          | 25             | 1000                                    | 82047                                 | 1115           | 61     |
| all                             | 8                                             | 712                                                                                             | 198     | 23                          | 67             | 1000                                    | 101375                                | 1616           | 104    |

Table (48): Number per 1000 of treated persons getting reimbursement for treatment and per 1000 distribution of total amount of reimbursement by source of reimbursement for each sex, mpce class and social-group

| all-India                       |                                               |                                                                                                 |         |                             |                |                                         | Rural + Urban                         |                |        |
|---------------------------------|-----------------------------------------------|-------------------------------------------------------------------------------------------------|---------|-----------------------------|----------------|-----------------------------------------|---------------------------------------|----------------|--------|
| mpce class (Rs.) / social group | no. per 1000 of persons getting reimbursement | reimbursement of total expenses (Rs.) incurred on treatment during last 15 days receivable from |         |                             |                | estd. total amt. of reimbursement (000) | treated persons getting reimbursement |                |        |
|                                 |                                               | employer                                                                                        |         | medical insurance companies | other agencies |                                         | total                                 | estd. no. (00) | sample |
|                                 |                                               | government                                                                                      | private |                             |                |                                         |                                       |                |        |
| (1)                             | (2)                                           | (3)                                                                                             | (4)     | (5)                         | (6)            | (7)                                     | (8)                                   | (9)            | (10)   |
| males                           |                                               |                                                                                                 |         |                             |                |                                         |                                       |                |        |
| mpce class                      |                                               |                                                                                                 |         |                             |                |                                         |                                       |                |        |
| 0 – 235                         | 0                                             | 0                                                                                               | 0       | 0                           | 0              | 0                                       | 0                                     | 0              | 0      |
| 235 – 265                       | 0                                             | 0                                                                                               | 0       | 0                           | 0              | 0                                       | 0                                     | 0              | 0      |
| 265 – 320                       | 6                                             | 250                                                                                             | 250     | 250                         | 250            | 1000                                    | 13218                                 | 121            | 2      |
| 320 – 365                       | 4                                             | 0                                                                                               | 1000    | 0                           | 0              | 1000                                    | 1046                                  | 95             | 1      |
| 365 – 410                       | 1                                             | 6                                                                                               | 994     | 0                           | 0              | 1000                                    | 1972                                  | 34             | 3      |
| 410 – 460                       | 0                                             | 638                                                                                             | 0       | 0                           | 362            | 1000                                    | 74                                    | 12             | 2      |
| 460 – 520                       | 2                                             | 885                                                                                             | 38      | 38                          | 38             | 1000                                    | 361                                   | 62             | 5      |
| 520 – 605                       | 6                                             | 971                                                                                             | 26      | 1                           | 1              | 1000                                    | 6008                                  | 213            | 11     |
| 605 – 730                       | 3                                             | 999                                                                                             | 0       | 0                           | 0              | 1000                                    | 3379                                  | 115            | 6      |
| 730 – 980                       | 5                                             | 395                                                                                             | 351     | 115                         | 139            | 1000                                    | 7276                                  | 228            | 12     |
| 980 – 1285                      | 6                                             | 767                                                                                             | 105     | 127                         | 0              | 1000                                    | 11165                                 | 135            | 10     |
| 1285 +                          | 11                                            | 607                                                                                             | 75      | 4                           | 314            | 1000                                    | 13586                                 | 352            | 24     |
| all                             | 4                                             | 561                                                                                             | 193     | 97                          | 149            | 1000                                    | 58085                                 | 1367           | 76     |
| social -group                   |                                               |                                                                                                 |         |                             |                |                                         |                                       |                |        |
| SC                              | 3                                             | 964                                                                                             | 35      | 0                           | 0              | 1000                                    | 2620                                  | 50             | 8      |
| ST                              | 1                                             | 264                                                                                             | 0       | 0                           | 736            | 1000                                    | 5789                                  | 50             | 9      |
| OBC                             | 4                                             | 498                                                                                             | 221     | 162                         | 119            | 1000                                    | 29254                                 | 541            | 24     |
| others                          | 6                                             | 683                                                                                             | 229     | 45                          | 43             | 1000                                    | 20423                                 | 727            | 35     |
| all                             | 4                                             | 561                                                                                             | 193     | 97                          | 149            | 1000                                    | 58085                                 | 1367           | 76     |
| females                         |                                               |                                                                                                 |         |                             |                |                                         |                                       |                |        |
| mpce class                      |                                               |                                                                                                 |         |                             |                |                                         |                                       |                |        |
| 0 – 235                         | 0                                             | 0                                                                                               | 0       | 0                           | 0              | 0                                       | 0                                     | 0              | 0      |
| 235 – 265                       | 0                                             | 0                                                                                               | 0       | 0                           | 0              | 0                                       | 0                                     | 0              | 0      |
| 265 – 320                       | 1                                             | 250                                                                                             | 250     | 250                         | 250            | 1000                                    | 736                                   | 18             | 1      |
| 320 – 365                       | 0                                             | 1000                                                                                            | 0       | 0                           | 0              | 1000                                    | 6                                     | 6              | 1      |
| 365 – 410                       | 2                                             | 0                                                                                               | 29      | 0                           | 971            | 1000                                    | 978                                   | 43             | 2      |
| 410 – 460                       | 4                                             | 199                                                                                             | 170     | 170                         | 460            | 1000                                    | 2183                                  | 114            | 6      |
| 460 – 520                       | 1                                             | 457                                                                                             | 138     | 22                          | 383            | 1000                                    | 1126                                  | 40             | 7      |
| 520 – 605                       | 5                                             | 794                                                                                             | 206     | 0                           | 0              | 1000                                    | 23535                                 | 181            | 6      |
| 605 – 730                       | 2                                             | 255                                                                                             | 262     | 240                         | 242            | 1000                                    | 10969                                 | 81             | 7      |
| 730 – 980                       | 5                                             | 526                                                                                             | 394     | 2                           | 78             | 1000                                    | 13267                                 | 262            | 23     |
| 980 – 1285                      | 8                                             | 842                                                                                             | 139     | 9                           | 9              | 1000                                    | 5440                                  | 212            | 13     |
| 1285 +                          | 7                                             | 905                                                                                             | 93      | 1                           | 1              | 1000                                    | 35018                                 | 293            | 16     |
| all                             | 3                                             | 706                                                                                             | 190     | 36                          | 68             | 1000                                    | 93259                                 | 1250           | 82     |

Continued

Table (48): Number per 1000 of treated persons getting reimbursement for treatment and per 1000 distribution of total amount of reimbursement by source of reimbursement for each sex, mpce class and social-group

| all-India                       |                                               |                                                                                                 |         |                             |                |                                         | Rural + Urban                         |                |        |
|---------------------------------|-----------------------------------------------|-------------------------------------------------------------------------------------------------|---------|-----------------------------|----------------|-----------------------------------------|---------------------------------------|----------------|--------|
| mpce class (Rs.) / social group | no. per 1000 of persons getting reimbursement | reimbursement of total expenses (Rs.) incurred on treatment during last 15 days receivable from |         |                             |                | estd. total amt. of reimbursement (000) | treated persons getting reimbursement |                |        |
|                                 |                                               | employer                                                                                        |         | medical insurance companies | other agencies |                                         | total                                 | estd. no. (00) | sample |
|                                 |                                               | government                                                                                      | private |                             |                |                                         |                                       |                |        |
| (1)                             | (2)                                           | (3)                                                                                             | (4)     | (5)                         | (6)            | (7)                                     | (8)                                   | (9)            | (10)   |
| social -group                   |                                               |                                                                                                 |         |                             | females        |                                         |                                       |                |        |
| SC                              | 1                                             | 310                                                                                             | 690     | 0                           | 0              | 1000                                    | 118                                   | 14             | 2      |
| ST                              | 2                                             | 498                                                                                             | 164     | 164                         | 174            | 1000                                    | 16838                                 | 153            | 13     |
| OBC                             | 2                                             | 665                                                                                             | 115     | 51                          | 169            | 1000                                    | 8701                                  | 282            | 22     |
| others                          | 6                                             | 764                                                                                             | 205     | 2                           | 29             | 1000                                    | 67601                                 | 802            | 45     |
| all                             | 3                                             | 706                                                                                             | 190     | 36                          | 68             | 1000                                    | 93259                                 | 1250           | 82     |
|                                 |                                               |                                                                                                 |         |                             | persons        |                                         |                                       |                |        |
| mpce class                      |                                               |                                                                                                 |         |                             |                |                                         |                                       |                |        |
| 0 – 235                         | 0                                             | 0                                                                                               | 0       | 0                           | 0              | 0                                       | 0                                     | 0              | 0      |
| 235 – 265                       | 0                                             | 0                                                                                               | 0       | 0                           | 0              | 0                                       | 0                                     | 0              | 0      |
| 265 – 320                       | 3                                             | 250                                                                                             | 250     | 250                         | 250            | 1000                                    | 13954                                 | 139            | 3      |
| 320 – 365                       | 2                                             | 6                                                                                               | 994     | 0                           | 0              | 1000                                    | 1052                                  | 101            | 2      |
| 365 – 410                       | 1                                             | 4                                                                                               | 674     | 0                           | 322            | 1000                                    | 2950                                  | 76             | 5      |
| 410 – 460                       | 2                                             | 214                                                                                             | 165     | 165                         | 456            | 1000                                    | 2258                                  | 126            | 8      |
| 460 – 520                       | 1                                             | 561                                                                                             | 113     | 26                          | 299            | 1000                                    | 1487                                  | 102            | 12     |
| 520 – 605                       | 5                                             | 830                                                                                             | 170     | 0                           | 0              | 1000                                    | 29543                                 | 394            | 17     |
| 605 – 730                       | 2                                             | 430                                                                                             | 201     | 184                         | 185            | 1000                                    | 14349                                 | 196            | 13     |
| 730 – 980                       | 5                                             | 479                                                                                             | 379     | 42                          | 100            | 1000                                    | 20542                                 | 491            | 35     |
| 980 – 1285                      | 7                                             | 792                                                                                             | 116     | 89                          | 3              | 1000                                    | 16605                                 | 347            | 23     |
| 1285 +                          | 9                                             | 822                                                                                             | 88      | 2                           | 89             | 1000                                    | 48604                                 | 645            | 40     |
| all                             | 4                                             | 650                                                                                             | 191     | 59                          | 99             | 1000                                    | 151344                                | 2618           | 158    |
| social -group                   |                                               |                                                                                                 |         |                             |                |                                         |                                       |                |        |
| SC                              | 2                                             | 936                                                                                             | 63      | 0                           | 0              | 1000                                    | 2737                                  | 64             | 10     |
| ST                              | 2                                             | 438                                                                                             | 122     | 122                         | 318            | 1000                                    | 22627                                 | 203            | 22     |
| OBC                             | 3                                             | 537                                                                                             | 197     | 136                         | 130            | 1000                                    | 37955                                 | 823            | 46     |
| others                          | 6                                             | 745                                                                                             | 211     | 12                          | 32             | 1000                                    | 88025                                 | 1529           | 80     |
| all                             | 4                                             | 650                                                                                             | 191     | 59                          | 99             | 1000                                    | 151344                                | 2618           | 158    |

Table (49): Number per 1000 of children (0 – 4 years) receiving any type of immunisation and average expenditure incurred by sex for each mpce class and social group

| all-India                            |                                                                                                               |                                                                  |                                                                  |                                                                  |                                                                  |                                                                  | Rural                                              |        |        |       |
|--------------------------------------|---------------------------------------------------------------------------------------------------------------|------------------------------------------------------------------|------------------------------------------------------------------|------------------------------------------------------------------|------------------------------------------------------------------|------------------------------------------------------------------|----------------------------------------------------|--------|--------|-------|
| mpce class<br>(Rs.)/<br>social group | number per 1000 of children (0 – 4 years) receiving any type of immunisation and average expenditure incurred |                                                                  |                                                                  |                                                                  |                                                                  |                                                                  | no. of children receiving any type of immunisation |        |        |       |
|                                      | boys                                                                                                          |                                                                  | girls                                                            |                                                                  | children                                                         |                                                                  | estd. no.<br>(00)                                  |        | sample |       |
|                                      | no. per<br>1000<br>receiving<br>any type<br>of immu-<br>nisation                                              | average<br>expen-<br>diture on<br>immu-<br>nisation<br>(Rs. 0.0) | no. per<br>1000<br>receiving<br>any type of<br>immu-<br>nisation | average<br>expen-<br>diture on<br>immu-<br>nisation<br>(Rs. 0.0) | no. per<br>1000<br>receiving<br>any type<br>of immu-<br>nisation | average<br>expen-<br>diture on<br>immu-<br>nisation<br>(Rs. 0.0) | boys                                               | girls  | boys   | girls |
| (1)                                  | (2)                                                                                                           | (3)                                                              | (4)                                                              | (5)                                                              | (6)                                                              | (7)                                                              | (8)                                                | (9)    | (10)   | (11)  |
| 210 – 225                            | 893                                                                                                           | 4.1                                                              | 880                                                              | 5.2                                                              | 886                                                              | 4.7                                                              | 31070                                              | 32645  | 836    | 857   |
| 22225 – 255                          | 853                                                                                                           | 12.1                                                             | 895                                                              | 11.5                                                             | 874                                                              | 11.8                                                             | 19830                                              | 22093  | 567    | 634   |
| 23255 – 300                          | 881                                                                                                           | 12                                                               | 881                                                              | 12.9                                                             | 881                                                              | 12.4                                                             | 42862                                              | 44886  | 1260   | 1308  |
| 24300 – 340                          | 878                                                                                                           | 8.8                                                              | 861                                                              | 9.5                                                              | 870                                                              | 9.1                                                              | 41333                                              | 38560  | 1251   | 1197  |
| 25340 – 380                          | 869                                                                                                           | 9.5                                                              | 854                                                              | 13.3                                                             | 862                                                              | 11.3                                                             | 42150                                              | 37884  | 1270   | 1164  |
| 26380 – 420                          | 885                                                                                                           | 17.6                                                             | 901                                                              | 12.2                                                             | 893                                                              | 14.9                                                             | 42999                                              | 42840  | 1358   | 1261  |
| 27420 – 470                          | 893                                                                                                           | 15                                                               | 906                                                              | 17.8                                                             | 900                                                              | 16.4                                                             | 40916                                              | 40947  | 1364   | 1309  |
| 28470 – 525                          | 927                                                                                                           | 25.9                                                             | 914                                                              | 17.7                                                             | 920                                                              | 21.8                                                             | 38570                                              | 38714  | 1358   | 1301  |
| 30525 – 615                          | 908                                                                                                           | 31                                                               | 889                                                              | 20.5                                                             | 899                                                              | 26                                                               | 32882                                              | 29780  | 1341   | 1184  |
| 31615 – 775                          | 918                                                                                                           | 34                                                               | 933                                                              | 28.5                                                             | 925                                                              | 31.4                                                             | 33323                                              | 29066  | 1341   | 1152  |
| 32775 – 950                          | 923                                                                                                           | 79.9                                                             | 920                                                              | 53.1                                                             | 922                                                              | 68.7                                                             | 14262                                              | 10297  | 602    | 479   |
| 33950 +                              | 949                                                                                                           | 142                                                              | 929                                                              | 93.7                                                             | 940                                                              | 120.6                                                            | 9774                                               | 7769   | 493    | 368   |
| 34all                                | 893                                                                                                           | 22.3                                                             | 892                                                              | 17.4                                                             | 892                                                              | 19.9                                                             | 389970                                             | 375480 | 13041  | 12214 |
| 35social-group                       |                                                                                                               |                                                                  |                                                                  |                                                                  |                                                                  |                                                                  |                                                    |        |        |       |
| 36ST                                 | 893                                                                                                           | 5.7                                                              | 900                                                              | 3.8                                                              | 897                                                              | 4.7                                                              | X                                                  | X      | X      | X     |
| 38SC                                 | 896                                                                                                           | 11.8                                                             | 888                                                              | 10                                                               | 892                                                              | 10.9                                                             | X                                                  | X      | X      | X     |
| 39OBC                                | 886                                                                                                           | 28.5                                                             | 881                                                              | 19.5                                                             | 883                                                              | 24.1                                                             | X                                                  | X      | X      | X     |
| 40others                             | 905                                                                                                           | 28.9                                                             | 909                                                              | 27.2                                                             | 907                                                              | 28                                                               | X                                                  | X      | X      | X     |
| 41all                                | 893                                                                                                           | 22.3                                                             | 892                                                              | 17.4                                                             | 892                                                              | 19.9                                                             | X                                                  | X      | X      | X     |
| 42estimated                          |                                                                                                               |                                                                  |                                                                  |                                                                  |                                                                  |                                                                  |                                                    |        |        |       |
| 43no. of                             |                                                                                                               |                                                                  |                                                                  |                                                                  |                                                                  |                                                                  |                                                    |        |        |       |
| 45children (00)                      | 389970                                                                                                        | X                                                                | 375480                                                           | X                                                                | 765450                                                           | X                                                                | X                                                  | X      | X      | X     |
| 46sample                             |                                                                                                               |                                                                  |                                                                  |                                                                  |                                                                  |                                                                  |                                                    |        |        |       |
| 47children                           | 13041                                                                                                         | X                                                                | 12214                                                            | X                                                                | 25255                                                            | X                                                                | X                                                  | X      | X      | X     |

Table (49): Number per 1000 of children (0 – 4 years) receiving any type of immunisation and average expenditure incurred by sex for each mpce class and social group

| mpce class<br>(Rs.) /<br>social group | number per 1000 of children (0 – 4 years) receiving any type of immunisation and average expenditure incurred |                                               |                                                 |                                               |                                                 |                                               | no. of children receiving any type of immunisation |       |        |       |
|---------------------------------------|---------------------------------------------------------------------------------------------------------------|-----------------------------------------------|-------------------------------------------------|-----------------------------------------------|-------------------------------------------------|-----------------------------------------------|----------------------------------------------------|-------|--------|-------|
|                                       | boys                                                                                                          |                                               | girls                                           |                                               | children                                        |                                               | estd. no. (00)                                     |       | sample |       |
|                                       | no. per 1000 receiving any type of immunisation                                                               | average expenditure on immunisation (Rs. 0.0) | no. per 1000 receiving any type of immunisation | average expenditure on immunisation (Rs. 0.0) | no. per 1000 receiving any type of immunisation | average expenditure on immunisation (Rs. 0.0) | boys                                               | girls | boys   | girls |
| (1)                                   | (2)                                                                                                           | (3)                                           | (4)                                             | (5)                                           | (6)                                             | (7)                                           | (8)                                                | (9)   | (10)   | (11)  |
| all-India                             |                                                                                                               |                                               |                                                 |                                               |                                                 |                                               |                                                    |       |        |       |
| Urban                                 |                                                                                                               |                                               |                                                 |                                               |                                                 |                                               |                                                    |       |        |       |
| 1-300                                 | 895                                                                                                           | 36.9                                          | 919                                             | 6.2                                           | 907                                             | 21.4                                          | 4939                                               | 5004  | 255    | 223   |
| 2-300 – 350                           | 905                                                                                                           | 18.2                                          | 886                                             | 19.5                                          | 897                                             | 18.8                                          | 3706                                               | 2906  | 182    | 163   |
| 3-350 – 425                           | 887                                                                                                           | 26.8                                          | 900                                             | 12.4                                          | 893                                             | 20.2                                          | 9639                                               | 8183  | 477    | 440   |
| 4-425 – 500                           | 919                                                                                                           | 18                                            | 945                                             | 19.5                                          | 932                                             | 18.8                                          | 15954                                              | 15127 | 874    | 816   |
| 5-500 – 575                           | 940                                                                                                           | 42.6                                          | 935                                             | 26                                            | 938                                             | 34.5                                          | 7188                                               | 6903  | 435    | 381   |
| 6-575 – 665                           | 951                                                                                                           | 41.1                                          | 953                                             | 65                                            | 952                                             | 52.2                                          | 11757                                              | 10180 | 673    | 588   |
| 7-665 – 775                           | 939                                                                                                           | 67                                            | 932                                             | 65.5                                          | 936                                             | 66.3                                          | 12996                                              | 11392 | 818    | 682   |
| 8-775 – 915                           | 952                                                                                                           | 85.3                                          | 942                                             | 104.5                                         | 948                                             | 94                                            | 11011                                              | 9142  | 747    | 651   |
| 9-915 – 1120                          | 963                                                                                                           | 178.6                                         | 944                                             | 148.2                                         | 954                                             | 165.2                                         | 12600                                              | 9937  | 810    | 674   |
| 10-1120 – 1500                        | 944                                                                                                           | 207.5                                         | 949                                             | 359.6                                         | 946                                             | 275.6                                         | 11023                                              | 8931  | 739    | 633   |
| 11-1500 – 1925                        | 978                                                                                                           | 389.8                                         | 941                                             | 447.7                                         | 962                                             | 414.6                                         | 3044                                               | 2276  | 215    | 188   |
| 12-1925 +                             | 928                                                                                                           | 615.8                                         | 980                                             | 796.2                                         | 948                                             | 686.6                                         | 4386                                               | 2828  | 281    | 222   |
| 13-all                                | 934                                                                                                           | 109.2                                         | 937                                             | 118.3                                         | 936                                             | 113.4                                         | 108243                                             | 92810 | 6506   | 5661  |
| 14-social-group                       |                                                                                                               |                                               |                                                 |                                               |                                                 |                                               |                                                    |       |        |       |
| 15-ST                                 | 952                                                                                                           | 30                                            | 966                                             | 71.7                                          | 959                                             | 51.4                                          | X                                                  | X     | X      | X     |
| 16-SC                                 | 928                                                                                                           | 34.7                                          | 926                                             | 54.7                                          | 927                                             | 44.2                                          | X                                                  | X     | X      | X     |
| 17-OBC                                | 932                                                                                                           | 79.1                                          | 948                                             | 75.9                                          | 940                                             | 77.6                                          | X                                                  | X     | X      | X     |
| 18-others                             | 938                                                                                                           | 171.8                                         | 930                                             | 194.8                                         | 935                                             | 182                                           | X                                                  | X     | X      | X     |
| 19-all                                | 934                                                                                                           | 109.2                                         | 937                                             | 118.3                                         | 936                                             | 113.4                                         | X                                                  | X     | X      | X     |
| 20-estimated                          |                                                                                                               |                                               |                                                 |                                               |                                                 |                                               |                                                    |       |        |       |
| 21-no. of                             |                                                                                                               |                                               |                                                 |                                               |                                                 |                                               |                                                    |       |        |       |
| 22-children (00)                      | 108243                                                                                                        | X                                             | 92810                                           | X                                             | 201053                                          | X                                             | X                                                  | X     | X      | X     |
| 23-sample                             |                                                                                                               |                                               |                                                 |                                               |                                                 |                                               |                                                    |       |        |       |
| 24-children                           | 6506                                                                                                          | X                                             | 5661                                            | X                                             | 12167                                           | X                                             | X                                                  | X     | X      | X     |

Table (49): Number per 1000 of children (0 – 4 years) receiving any type of immunisation and average expenditure incurred by sex for each mpce class and social group

| all-India                            |                                                                                                               |                                                                  |                                                                  |                                                                  |                                                                  |                                                                  | Rural + Urban                                      |        |        |       |
|--------------------------------------|---------------------------------------------------------------------------------------------------------------|------------------------------------------------------------------|------------------------------------------------------------------|------------------------------------------------------------------|------------------------------------------------------------------|------------------------------------------------------------------|----------------------------------------------------|--------|--------|-------|
| mpce class<br>(Rs.)/<br>social group | number per 1000 of children (0 – 4 years) receiving any type of immunisation and average expenditure incurred |                                                                  |                                                                  |                                                                  |                                                                  |                                                                  | no. of children receiving any type of immunisation |        |        |       |
|                                      | boys                                                                                                          |                                                                  | girls                                                            |                                                                  | children                                                         |                                                                  | estd. no.<br>(00)                                  |        | sample |       |
|                                      | no. per<br>1000<br>receiving<br>any type<br>of immu-<br>nisation                                              | average<br>expen-<br>diture on<br>immu-<br>nisation<br>(Rs. 0.0) | no. per<br>1000<br>receiving<br>any type of<br>immu-<br>nisation | average<br>expen-<br>diture on<br>immu-<br>nisation<br>(Rs. 0.0) | no. per<br>1000<br>receiving<br>any type<br>of immu-<br>nisation | average<br>expen-<br>diture on<br>immu-<br>nisation<br>(Rs. 0.0) | boys                                               | girls  | boys   | girls |
| (1)                                  | (2)                                                                                                           | (3)                                                              | (4)                                                              | (5)                                                              | (6)                                                              | (7)                                                              | (8)                                                | (9)    | (10)   | (11)  |
| 210 – 235                            | 893                                                                                                           | 8.6                                                              | 885                                                              | 5.3                                                              | 889                                                              | 6.9                                                              | 36009                                              | 37649  | 1091   | 1080  |
| 22235 – 265                          | 861                                                                                                           | 13.1                                                             | 894                                                              | 12.4                                                             | 877                                                              | 12.7                                                             | 23536                                              | 24999  | 749    | 797   |
| 23265 – 320                          | 882                                                                                                           | 14.7                                                             | 884                                                              | 12.8                                                             | 883                                                              | 13.7                                                             | 52501                                              | 53069  | 1737   | 1748  |
| 24320 – 365                          | 889                                                                                                           | 11.3                                                             | 884                                                              | 12.3                                                             | 886                                                              | 11.8                                                             | 57288                                              | 53687  | 2125   | 2013  |
| 25365 – 410                          | 879                                                                                                           | 14.3                                                             | 865                                                              | 15.2                                                             | 872                                                              | 14.7                                                             | 49338                                              | 44787  | 1705   | 1545  |
| 26410 – 460                          | 898                                                                                                           | 22.7                                                             | 910                                                              | 22.4                                                             | 904                                                              | 22.5                                                             | 54756                                              | 53020  | 2031   | 1849  |
| 27460 – 520                          | 904                                                                                                           | 27.6                                                             | 912                                                              | 28.2                                                             | 908                                                              | 27.9                                                             | 53912                                              | 52339  | 2182   | 1991  |
| 28520 – 605                          | 933                                                                                                           | 39.1                                                             | 919                                                              | 34.3                                                             | 926                                                              | 36.7                                                             | 49580                                              | 47855  | 2105   | 1952  |
| 29605 – 730                          | 923                                                                                                           | 71.9                                                             | 902                                                              | 52.5                                                             | 913                                                              | 62.8                                                             | 45482                                              | 39717  | 2151   | 1858  |
| 31730 – 980                          | 925                                                                                                           | 77.1                                                             | 937                                                              | 106.3                                                            | 930                                                              | 90.6                                                             | 44345                                              | 37997  | 2080   | 1785  |
| 32980 – 1285                         | 932                                                                                                           | 134.5                                                            | 924                                                              | 124.5                                                            | 929                                                              | 130.3                                                            | 17306                                              | 12573  | 817    | 667   |
| 331285 +                             | 942                                                                                                           | 288.7                                                            | 942                                                              | 281.2                                                            | 942                                                              | 285.5                                                            | 14160                                              | 10597  | 774    | 590   |
| 34all                                | 902                                                                                                           | 41.2                                                             | 900                                                              | 37.4                                                             | 901                                                              | 39.3                                                             | 498213                                             | 468290 | 19547  | 17875 |
| 35social-group                       |                                                                                                               |                                                                  |                                                                  |                                                                  |                                                                  |                                                                  |                                                    |        |        |       |
| 36ST                                 | 897                                                                                                           | 7.2                                                              | 904                                                              | 8                                                                | 900                                                              | 7.6                                                              | X                                                  | X      | X      | X     |
| 38SC                                 | 901                                                                                                           | 15.8                                                             | 894                                                              | 17.4                                                             | 898                                                              | 16.6                                                             | X                                                  | X      | X      | X     |
| 39OBC                                | 895                                                                                                           | 38.5                                                             | 893                                                              | 30.2                                                             | 894                                                              | 34.5                                                             | X                                                  | X      | X      | X     |
| 40others                             | 915                                                                                                           | 75.3                                                             | 915                                                              | 74.7                                                             | 915                                                              | 75                                                               | X                                                  | X      | X      | X     |
| 41all                                | 902                                                                                                           | 41.2                                                             | 900                                                              | 37.4                                                             | 901                                                              | 39.3                                                             | X                                                  | X      | X      | X     |
| 42estimated                          |                                                                                                               |                                                                  |                                                                  |                                                                  |                                                                  |                                                                  |                                                    |        |        |       |
| 43no. of                             |                                                                                                               |                                                                  |                                                                  |                                                                  |                                                                  |                                                                  |                                                    |        |        |       |
| 44children (00)                      | 498213                                                                                                        | X                                                                | 468290                                                           | X                                                                | 966503                                                           | X                                                                | X                                                  | X      | X      | X     |
| 45sample                             |                                                                                                               |                                                                  |                                                                  |                                                                  |                                                                  |                                                                  |                                                    |        |        |       |
| 46children                           | 19547                                                                                                         | X                                                                | 17875                                                            | X                                                                | 37422                                                            | X                                                                | X                                                  | X      | X      | X     |

Table (50): Per 1000 number of ever married women aged 15 - 49 yrs. who were pregnant any time during last 365 days, their distribution by status of pregnancy and place of childbirth, and average expenditure incurred per case of childbirth, separately for each age-group, mpce class and social group

| all-India                                                            |                                                                           |                                                                                           |                        |                     |         |      |       |                                         |                      |         |      | Rural                                                                              |        |
|----------------------------------------------------------------------|---------------------------------------------------------------------------|-------------------------------------------------------------------------------------------|------------------------|---------------------|---------|------|-------|-----------------------------------------|----------------------|---------|------|------------------------------------------------------------------------------------|--------|
| age-group of ever married women<br>mpce class (Rs.)/<br>social group | no. per 1000 of women who were pregnant at some time during last 365 days | status of pregnancy of ever married women on the date of survey (and place of childbirth) |                        |                     |         |      |       | average expenditure on childbirth (Rs.) |                      |         |      | ever married women (15-49 yrs) who were pregnant at some time during last 365 days |        |
|                                                                      |                                                                           | child-birth not taken place                                                               | childbirth taken place |                     |         | n.r. | total | govt. hos-pital                         | pri- vate hos- pital | at home | all  | estd. no. (00)                                                                     | sample |
|                                                                      |                                                                           |                                                                                           | in govt. hospital      | in private hospital | at home |      |       |                                         |                      |         |      |                                                                                    |        |
| (1)                                                                  | (2)                                                                       | (3)                                                                                       | (4)                    | (5)                 | (6)     | (7)  | (8)   | (9)                                     | (10)                 | (11)    | (12) | (13)                                                                               | (14)   |
| 15 - 19                                                              | 250                                                                       | 366                                                                                       | 137                    | 109                 | 378     | 10   | 1000  | 1029                                    | 3323                 | 330     | 1007 | 18363                                                                              | 618    |
| 20 - 24                                                              | 289                                                                       | 268                                                                                       | 141                    | 142                 | 439     | 11   | 1000  | 1145                                    | 4310                 | 429     | 1333 | 73625                                                                              | 2622   |
| 25 - 29                                                              | 175                                                                       | 272                                                                                       | 138                    | 115                 | 458     | 17   | 1000  | 1168                                    | 4146                 | 440     | 1181 | 49172                                                                              | 1826   |
| 30 - 34                                                              | 99                                                                        | 226                                                                                       | 123                    | 109                 | 537     | 5    | 1000  | 953                                     | 4343                 | 424     | 1066 | 26565                                                                              | 908    |
| 35 - 39                                                              | 45                                                                        | 232                                                                                       | 62                     | 45                  | 622     | 39   | 1000  | 2050                                    | 3123                 | 334     | 652  | 10381                                                                              | 371    |
| 40 - 44                                                              | 19                                                                        | 128                                                                                       | 100                    | 67                  | 575     | 131  | 1000  | 3249                                    | 3902                 | 372     | 1077 | 3359                                                                               | 123    |
| 45 - 49                                                              | 14                                                                        | 161                                                                                       | 46                     | 67                  | 649     | 77   | 1000  | 705                                     | 1989                 | 399     | 557  | 2055                                                                               | 69     |
| all (15-49)                                                          | 127                                                                       | 267                                                                                       | 131                    | 119                 | 467     | 16   | 1000  | 1165                                    | 4137                 | 414     | 1169 | 183521                                                                             | 6537   |
| mpce class                                                           |                                                                           |                                                                                           |                        |                     |         |      |       |                                         |                      |         |      |                                                                                    |        |
| 0 - 225                                                              | 154                                                                       | 171                                                                                       | 77                     | 51                  | 664     | 37   | 1000  | 765                                     | 2232                 | 329     | 494  | 12004                                                                              | 340    |
| 225 - 255                                                            | 142                                                                       | 215                                                                                       | 76                     | 52                  | 642     | 16   | 1000  | 652                                     | 2886                 | 418     | 606  | 8738                                                                               | 261    |
| 255 - 300                                                            | 146                                                                       | 163                                                                                       | 115                    | 81                  | 605     | 37   | 1000  | 990                                     | 1951                 | 352     | 605  | 19712                                                                              | 593    |
| 300 - 340                                                            | 133                                                                       | 247                                                                                       | 139                    | 64                  | 532     | 18   | 1000  | 609                                     | 2801                 | 444     | 679  | 16826                                                                              | 583    |
| 340 - 380                                                            | 145                                                                       | 235                                                                                       | 182                    | 51                  | 516     | 17   | 1000  | 607                                     | 3003                 | 351     | 593  | 20455                                                                              | 620    |
| 380 - 420                                                            | 119                                                                       | 241                                                                                       | 125                    | 117                 | 509     | 9    | 1000  | 1234                                    | 2790                 | 461     | 952  | 17818                                                                              | 631    |
| 420 - 470                                                            | 126                                                                       | 241                                                                                       | 165                    | 109                 | 480     | 5    | 1000  | 1231                                    | 3630                 | 383     | 1037 | 19057                                                                              | 664    |
| 470 - 525                                                            | 129                                                                       | 323                                                                                       | 118                    | 147                 | 404     | 9    | 1000  | 1506                                    | 2825                 | 462     | 1165 | 20330                                                                              | 728    |
| 525 - 615                                                            | 115                                                                       | 320                                                                                       | 146                    | 153                 | 367     | 14   | 1000  | 1432                                    | 4163                 | 550     | 1573 | 17061                                                                              | 718    |
| 615 - 775                                                            | 114                                                                       | 350                                                                                       | 139                    | 197                 | 307     | 8    | 1000  | 1479                                    | 5505                 | 433     | 2216 | 16873                                                                              | 711    |

Continued

Table (50): Per 1000 number of ever married women aged 15 - 49 yrs. who were pregnant any time during last 365 days, their distribution by status of pregnancy and place of childbirth, and average expenditure incurred per case of childbirth, separately for each age-group, mpce class and social group

| all-India                                                      |                                                                           |                                                                                           |                        |                     |         |      |       |                                         |                      |         |      | Rural                                                                              |        |
|----------------------------------------------------------------|---------------------------------------------------------------------------|-------------------------------------------------------------------------------------------|------------------------|---------------------|---------|------|-------|-----------------------------------------|----------------------|---------|------|------------------------------------------------------------------------------------|--------|
| age-group of ever married women mpce class (Rs.)/ social group | no. per 1000 of women who were pregnant at some time during last 365 days | status of pregnancy of ever married women on the date of survey (and place of childbirth) |                        |                     |         |      |       | average expenditure on childbirth (Rs.) |                      |         |      | ever married women (15-49 yrs) who were pregnant at some time during last 365 days |        |
|                                                                |                                                                           | child-birth not taken place                                                               | childbirth taken place |                     |         | n.r. | total | govt. hos-pital                         | pri- vate hos- pital | at home | all  | estd. no. (00)                                                                     | sample |
|                                                                |                                                                           |                                                                                           | in govt. hospital      | in private hospital | at home |      |       |                                         |                      |         |      |                                                                                    |        |
|                                                                |                                                                           |                                                                                           | (4)                    | (5)                 | (6)     |      |       |                                         |                      |         |      |                                                                                    |        |
| (1)                                                            | (2)                                                                       | (3)                                                                                       | (4)                    | (5)                 | (6)     | (7)  | (8)   | (9)                                     | (10)                 | (11)    | (12) | (13)                                                                               | (14)   |
| 775 - 950                                                      | 118                                                                       | 373                                                                                       | 119                    | 237                 | 257     | 13   | 1000  | 2343                                    | 7611                 | 522     | 3616 | 8674                                                                               | 381    |
| 950 +                                                          | 85                                                                        | 473                                                                                       | 79                     | 327                 | 111     | 10   | 1000  | 2628                                    | 6087                 | 570     | 4371 | 5975                                                                               | 307    |
| all                                                            | 127                                                                       | 267                                                                                       | 131                    | 119                 | 467     | 16   | 1000  | 1165                                    | 4137                 | 414     | 1169 | 183521                                                                             | 6537   |
| social group:                                                  |                                                                           |                                                                                           |                        |                     |         |      |       |                                         |                      |         |      |                                                                                    |        |
| ST                                                             | 131                                                                       | 234                                                                                       | 113                    | 46                  | 599     | 8    | 1000  | 675                                     | 3082                 | 264     | 496  | 18968                                                                              | 946    |
| SC                                                             | 141                                                                       | 239                                                                                       | 151                    | 84                  | 518     | 8    | 1000  | 935                                     | 3212                 | 408     | 825  | 43212                                                                              | 1303   |
| OBC                                                            | 125                                                                       | 273                                                                                       | 124                    | 134                 | 456     | 13   | 1000  | 1236                                    | 3673                 | 446     | 1189 | 75889                                                                              | 2605   |
| others                                                         | 119                                                                       | 297                                                                                       | 130                    | 158                 | 382     | 32   | 1000  | 1485                                    | 5385                 | 456     | 1819 | 45453                                                                              | 1683   |
| all                                                            | 127                                                                       | 267                                                                                       | 131                    | 119                 | 467     | 16   | 1000  | 1165                                    | 4137                 | 414     | 1169 | 183521                                                                             | 6537   |



Table (50): Per 1000 number of ever married women aged 15 - 49 yrs. who were pregnant any time during last 365 days, their distribution by status of pregnancy and place of childbirth, and average expenditure incurred per case of childbirth, separately for each age-group, mpce class and social group

| all-India                                                      |                                                                           |                                                                                           |                        |                     |         |      |       |                                         |                      |         |      | Urban                                                                              |        |
|----------------------------------------------------------------|---------------------------------------------------------------------------|-------------------------------------------------------------------------------------------|------------------------|---------------------|---------|------|-------|-----------------------------------------|----------------------|---------|------|------------------------------------------------------------------------------------|--------|
| age-group of ever married women mpce class (Rs.)/ social group | no. per 1000 of women who were pregnant at some time during last 365 days | status of pregnancy of ever married women on the date of survey (and place of childbirth) |                        |                     |         |      |       | average expenditure on childbirth (Rs.) |                      |         |      | ever married women (15-49 yrs) who were pregnant at some time during last 365 days |        |
|                                                                |                                                                           | child-birth not taken place                                                               | childbirth taken place |                     |         | n.r. | total | govt. hos-pital                         | pri- vate hos- pital | at home | all  | estd. no. (00)                                                                     | sample |
|                                                                |                                                                           |                                                                                           | in govt. hospital      | in private hospital | at home |      |       |                                         |                      |         |      |                                                                                    |        |
|                                                                |                                                                           |                                                                                           | (3)                    | (4)                 | (5)     |      |       |                                         |                      |         |      |                                                                                    |        |
| (1)                                                            | (2)                                                                       | (3)                                                                                       | (4)                    | (5)                 | (6)     | (7)  | (8)   | (9)                                     | (10)                 | (11)    | (12) | (13)                                                                               | (14)   |
| 15 - 19                                                        | 293                                                                       | 445                                                                                       | 184                    | 212                 | 159     | 0    | 1000  | 706                                     | 7240                 | 391     | 3106 | 3480                                                                               | 183    |
| 20 - 24                                                        | 323                                                                       | 308                                                                                       | 226                    | 279                 | 185     | 2    | 1000  | 880                                     | 4961                 | 556     | 2441 | 22983                                                                              | 1289   |
| 25 - 29                                                        | 178                                                                       | 283                                                                                       | 218                    | 344                 | 150     | 5    | 1000  | 965                                     | 5291                 | 545     | 2968 | 15966                                                                              | 1037   |
| 30 - 34                                                        | 69                                                                        | 254                                                                                       | 192                    | 339                 | 202     | 14   | 1000  | 1696                                    | 6245                 | 470     | 3462 | 6281                                                                               | 410    |
| 35 - 39                                                        | 23                                                                        | 201                                                                                       | 185                    | 236                 | 287     | 92   | 1000  | 979                                     | 7892                 | 889     | 3245 | 2075                                                                               | 152    |
| 40 - 44                                                        | 6                                                                         | 182                                                                                       | 52                     | 114                 | 528     | 125  | 1000  | 470                                     | 13768                | 517     | 2689 | 459                                                                                | 36     |
| 45 - 49                                                        | 6                                                                         | 149                                                                                       | 465                    | 221                 | 42      | 123  | 1000  | 1341                                    | 3226                 | 299     | 1852 | 347                                                                                | 20     |
| all (15-49)                                                    | 107                                                                       | 296                                                                                       | 215                    | 298                 | 181     | 10   | 1000  | 994                                     | 5480                 | 552     | 2806 | 51591                                                                              | 3127   |
| mpce class                                                     |                                                                           |                                                                                           |                        |                     |         |      |       |                                         |                      |         |      |                                                                                    |        |
| 0 - 300                                                        | 157                                                                       | 170                                                                                       | 309                    | 53                  | 429     | 39   | 1000  | 671                                     | 4845                 | 466     | 841  | 2287                                                                               | 112    |
| 300 - 350                                                      | 155                                                                       | 197                                                                                       | 321                    | 192                 | 290     | 0    | 1000  | 628                                     | 1799                 | 614     | 903  | 1736                                                                               | 95     |
| 350 - 425                                                      | 115                                                                       | 200                                                                                       | 268                    | 233                 | 297     | 2    | 1000  | 724                                     | 3633                 | 447     | 1469 | 3396                                                                               | 206    |
| 425 - 500                                                      | 137                                                                       | 294                                                                                       | 228                    | 201                 | 270     | 6    | 1000  | 790                                     | 3790                 | 512     | 1543 | 7819                                                                               | 428    |
| 500 - 575                                                      | 145                                                                       | 291                                                                                       | 186                    | 235                 | 279     | 10   | 1000  | 928                                     | 3058                 | 591     | 1508 | 3911                                                                               | 202    |
| 575 - 665                                                      | 110                                                                       | 239                                                                                       | 343                    | 190                 | 224     | 4    | 1000  | 781                                     | 3837                 | 488     | 1462 | 4722                                                                               | 306    |
| 665 - 775                                                      | 112                                                                       | 298                                                                                       | 265                    | 247                 | 188     | 1    | 1000  | 1021                                    | 7280                 | 614     | 3119 | 6487                                                                               | 388    |
| 775 - 915                                                      | 103                                                                       | 274                                                                                       | 251                    | 332                 | 129     | 14   | 1000  | 949                                     | 4754                 | 666     | 2673 | 5395                                                                               | 351    |
| 915 - 1120                                                     | 99                                                                        | 357                                                                                       | 130                    | 413                 | 75      | 25   | 1000  | 2653                                    | 4926                 | 530     | 3913 | 6320                                                                               | 413    |
| 1120 - 1500                                                    | 82                                                                        | 328                                                                                       | 112                    | 530                 | 25      | 5    | 1000  | 989                                     | 6095                 | 1566    | 5070 | 5365                                                                               | 362    |

Continued

Table (50): Per 1000 number of ever married women aged 15 - 49 yrs. who were pregnant any time during last 365 days, their distribution by status of pregnancy and place of childbirth, and average expenditure incurred per case of childbirth, separately for each age-group, mpce class and social group

| all-India                                                      |                                                                           |                                                                                           |                        |                     |         |      |       |                                         |                      |         |      | Urban                                                                              |        |
|----------------------------------------------------------------|---------------------------------------------------------------------------|-------------------------------------------------------------------------------------------|------------------------|---------------------|---------|------|-------|-----------------------------------------|----------------------|---------|------|------------------------------------------------------------------------------------|--------|
| age-group of ever married women mpce class (Rs.)/ social group | no. per 1000 of women who were pregnant at some time during last 365 days | status of pregnancy of ever married women on the date of survey (and place of childbirth) |                        |                     |         |      |       | average expenditure on childbirth (Rs.) |                      |         |      | ever married women (15-49 yrs) who were pregnant at some time during last 365 days |        |
|                                                                |                                                                           | child-birth not taken place                                                               | childbirth taken place |                     |         | n.r. | total | govt. hos-pital                         | pri- vate hos- pital | at home | all  | estd. no. (00)                                                                     | sample |
|                                                                |                                                                           |                                                                                           | in govt. hospital      | in private hospital | at home |      |       |                                         |                      |         |      |                                                                                    |        |
| (1)                                                            | (2)                                                                       | (3)                                                                                       | (4)                    | (5)                 | (6)     | (7)  | (8)   | (9)                                     | (10)                 | (11)    | (12) | (13)                                                                               | (14)   |
| 1500 – 1925                                                    | 88                                                                        | 415                                                                                       | 99                     | 483                 | 2       | 1    | 1000  | 1208                                    | 7976                 | 1222    | 6807 | 1909                                                                               | 127    |
| 1925 +                                                         | 57                                                                        | 486                                                                                       | 51                     | 439                 | 16      | 8    | 1000  | 1470                                    | 10471                | 79      | 9239 | 2245                                                                               | 137    |
| all                                                            | 107                                                                       | 296                                                                                       | 215                    | 298                 | 181     | 10   | 1000  | 994                                     | 5480                 | 552     | 2806 | 51591                                                                              | 3127   |
| social group:                                                  |                                                                           |                                                                                           |                        |                     |         |      |       |                                         |                      |         |      |                                                                                    |        |
| ST                                                             | 143                                                                       | 218                                                                                       | 357                    | 162                 | 252     | 11   | 1000  | 813                                     | 5458                 | 388     | 1650 | 1663                                                                               | 215    |
| SC                                                             | 124                                                                       | 288                                                                                       | 273                    | 176                 | 253     | 9    | 1000  | 737                                     | 5070                 | 506     | 1741 | 9388                                                                               | 499    |
| OBC                                                            | 116                                                                       | 299                                                                                       | 188                    | 297                 | 209     | 7    | 1000  | 852                                     | 5299                 | 637     | 2691 | 20281                                                                              | 1136   |
| others                                                         | 92                                                                        | 305                                                                                       | 204                    | 367                 | 113     | 12   | 1000  | 1312                                    | 5719                 | 472     | 3539 | 20258                                                                              | 1277   |
| all                                                            | 107                                                                       | 296                                                                                       | 215                    | 298                 | 181     | 10   | 1000  | 994                                     | 5480                 | 552     | 2806 | 51591                                                                              | 3127   |

Table (50): Per 1000 number of ever married women aged 15 - 49 yrs. who were pregnant any time during last 365 days, their distribution by status of pregnancy and place of childbirth, and average expenditure incurred per case of childbirth, separately for each age-group, mpce class and social group

| all-India                                                      |                                                                           |                                                                                           |                        |                     |         |      |       |                                         |                      |         |      | Rural + Urban                                                                      |        |
|----------------------------------------------------------------|---------------------------------------------------------------------------|-------------------------------------------------------------------------------------------|------------------------|---------------------|---------|------|-------|-----------------------------------------|----------------------|---------|------|------------------------------------------------------------------------------------|--------|
| age-group of ever married women mpce class (Rs.)/ social group | no. per 1000 of women who were pregnant at some time during last 365 days | status of pregnancy of ever married women on the date of survey (and place of childbirth) |                        |                     |         |      |       | average expenditure on childbirth (Rs.) |                      |         |      | ever married women (15-49 yrs) who were pregnant at some time during last 365 days |        |
|                                                                |                                                                           | child-birth not taken place                                                               | childbirth taken place |                     |         | n.r. | total | govt. hos-pital                         | pri- vate hos- pital | at home | all  | estd. no. (00)                                                                     | sample |
|                                                                |                                                                           |                                                                                           | in govt. hospital      | in private hospital | at home |      |       |                                         |                      |         |      |                                                                                    |        |
| (1)                                                            | (2)                                                                       | (3)                                                                                       | (4)                    | (5)                 | (6)     | (7)  | (8)   | (9)                                     | (10)                 | (11)    | (12) | (13)                                                                               | (14)   |
| 15 - 19                                                        | 256                                                                       | 379                                                                                       | 145                    | 125                 | 343     | 8    | 1000  | 963                                     | 4376                 | 334     | 1310 | 21843                                                                              | 801    |
| 20 - 24                                                        | 297                                                                       | 277                                                                                       | 161                    | 174                 | 378     | 8    | 1000  | 1056                                    | 4557                 | 444     | 1587 | 96608                                                                              | 3911   |
| 25 - 29                                                        | 175                                                                       | 274                                                                                       | 157                    | 171                 | 383     | 14   | 1000  | 1099                                    | 4710                 | 450     | 1619 | 65138                                                                              | 2863   |
| 30 - 34                                                        | 91                                                                        | 231                                                                                       | 136                    | 153                 | 473     | 7    | 1000  | 1154                                    | 5147                 | 428     | 1507 | 32846                                                                              | 1318   |
| 35 - 39                                                        | 39                                                                        | 227                                                                                       | 82                     | 77                  | 566     | 48   | 1000  | 1650                                    | 5553                 | 380     | 1073 | 12456                                                                              | 523    |
| 40 - 44                                                        | 15                                                                        | 134                                                                                       | 94                     | 72                  | 570     | 130  | 1000  | 3065                                    | 5767                 | 388     | 1259 | 3818                                                                               | 159    |
| 45 - 49                                                        | 12                                                                        | 159                                                                                       | 106                    | 89                  | 562     | 84   | 1000  | 1107                                    | 2431                 | 398     | 737  | 2402                                                                               | 89     |
| all (15-49)                                                    | 122                                                                       | 273                                                                                       | 149                    | 158                 | 404     | 15   | 1000  | 1111                                    | 4692                 | 428     | 1519 | 235113                                                                             | 9664   |
| mpce class                                                     |                                                                           |                                                                                           |                        |                     |         |      |       |                                         |                      |         |      |                                                                                    |        |
| 0 - 235                                                        | 155                                                                       | 171                                                                                       | 114                    | 52                  | 627     | 37   | 1000  | 724                                     | 2662                 | 344     | 550  | 14291                                                                              | 452    |
| 235 - 265                                                      | 144                                                                       | 212                                                                                       | 117                    | 75                  | 583     | 13   | 1000  | 641                                     | 2424                 | 434     | 657  | 10474                                                                              | 356    |
| 265 - 320                                                      | 140                                                                       | 169                                                                                       | 137                    | 103                 | 560     | 32   | 1000  | 914                                     | 2509                 | 359     | 731  | 23108                                                                              | 799    |
| 320 - 365                                                      | 134                                                                       | 262                                                                                       | 167                    | 107                 | 449     | 15   | 1000  | 687                                     | 3388                 | 457     | 944  | 24645                                                                              | 1011   |
| 365 - 410                                                      | 145                                                                       | 244                                                                                       | 182                    | 80                  | 478     | 15   | 1000  | 659                                     | 3029                 | 373     | 732  | 24366                                                                              | 822    |
| 410 - 460                                                      | 117                                                                       | 240                                                                                       | 171                    | 132                 | 449     | 8    | 1000  | 1044                                    | 3106                 | 464     | 1059 | 22540                                                                              | 937    |
| 460 - 520                                                      | 122                                                                       | 255                                                                                       | 190                    | 144                 | 406     | 4    | 1000  | 1157                                    | 5221                 | 410     | 1537 | 25544                                                                              | 1052   |
| 520 - 605                                                      | 123                                                                       | 313                                                                                       | 146                    | 186                 | 346     | 10   | 1000  | 1304                                    | 3549                 | 478     | 1497 | 25725                                                                              | 1079   |
| 605 - 730                                                      | 110                                                                       | 330                                                                                       | 142                    | 223                 | 288     | 17   | 1000  | 1734                                    | 4544                 | 549     | 2172 | 23381                                                                              | 1131   |
| 730 - 980                                                      | 104                                                                       | 344                                                                                       | 132                    | 278                 | 239     | 7    | 1000  | 1379                                    | 5777                 | 461     | 2924 | 22238                                                                              | 1073   |

Continued

Table (50): Per 1000 number of ever married women aged 15 - 49 yrs. who were pregnant any time during last 365 days, their distribution by status of pregnancy and place of childbirth, and average expenditure incurred per case of childbirth, separately for each age-group, mpce class and social group

| all-India                                                      |                                                                           |                                                                                           |                        |                     |         |      |       |                                         |                      |         |      | Rural + Urban                                                                      |        |
|----------------------------------------------------------------|---------------------------------------------------------------------------|-------------------------------------------------------------------------------------------|------------------------|---------------------|---------|------|-------|-----------------------------------------|----------------------|---------|------|------------------------------------------------------------------------------------|--------|
| age-group of ever married women mpce class (Rs.)/ social group | no. per 1000 of women who were pregnant at some time during last 365 days | status of pregnancy of ever married women on the date of survey (and place of childbirth) |                        |                     |         |      |       | average expenditure on childbirth (Rs.) |                      |         |      | ever married women (15-49 yrs) who were pregnant at some time during last 365 days |        |
|                                                                |                                                                           | child-birth not taken place                                                               | childbirth taken place |                     |         | n.r. | total | govt. hos-pital                         | pri- vate hos- pital | at home | all  | estd. no. (00)                                                                     | sample |
|                                                                |                                                                           |                                                                                           | in govt. hospital      | in private hospital | at home |      |       |                                         |                      |         |      |                                                                                    |        |
| (1)                                                            | (2)                                                                       | (3)                                                                                       | (4)                    | (5)                 | (6)     | (7)  | (8)   | (9)                                     | (10)                 | (11)    | (12) | (13)                                                                               | (14)   |
| 980 - 1285                                                     | 111                                                                       | 381                                                                                       | 116                    | 282                 | 211     | 11   | 1000  | 2167                                    | 7724                 | 523     | 4168 | 10582                                                                              | 508    |
| 1285 +                                                         | 75                                                                        | 477                                                                                       | 71                     | 357                 | 85      | 9    | 1000  | 2403                                    | 7558                 | 544     | 5680 | 8219                                                                               | 444    |
| all                                                            | 122                                                                       | 273                                                                                       | 149                    | 158                 | 404     | 15   | 1000  | 1111                                    | 4692                 | 428     | 1519 | 235113                                                                             | 9664   |
| social group:                                                  |                                                                           |                                                                                           |                        |                     |         |      |       |                                         |                      |         |      |                                                                                    |        |
| ST                                                             | 132                                                                       | 233                                                                                       | 133                    | 55                  | 571     | 8    | 1000  | 705                                     | 3644                 | 269     | 591  | 20631                                                                              | 1161   |
| SC                                                             | 138                                                                       | 248                                                                                       | 173                    | 100                 | 471     | 9    | 1000  | 879                                     | 3796                 | 418     | 979  | 52600                                                                              | 1802   |
| OBC                                                            | 123                                                                       | 278                                                                                       | 138                    | 169                 | 404     | 11   | 1000  | 1125                                    | 4278                 | 467     | 1498 | 96170                                                                              | 3741   |
| others                                                         | 109                                                                       | 300                                                                                       | 153                    | 223                 | 299     | 26   | 1000  | 1414                                    | 5555                 | 458     | 2357 | 65711                                                                              | 2960   |
| all                                                            | 122                                                                       | 273                                                                                       | 149                    | 158                 | 404     | 15   | 1000  | 1111                                    | 4692                 | 428     | 1519 | 235113                                                                             | 9664   |

Table (51): (i) Per 1000 distribution of ever married pregnant women (15 - 49 yrs.) during last 365 days, by source of receiving pre-natal care, (ii) per 1000 distribution of ever married pregnant women (15 - 49 yrs.) who gave child birth by source of receiving post-natal care, and (iii) average expenditure on pre-natal care and post-natal care by type of institution for each age-group

| all-India                       |                                                                               |                   |                     |      |      |                                                      |                     |     |                                                                                |                   |                     |      |                                                       |                   |                     |                                          | Rural          |        |
|---------------------------------|-------------------------------------------------------------------------------|-------------------|---------------------|------|------|------------------------------------------------------|---------------------|-----|--------------------------------------------------------------------------------|-------------------|---------------------|------|-------------------------------------------------------|-------------------|---------------------|------------------------------------------|----------------|--------|
| age-group of ever married women | per 1000 distribution of pregnant women by source of receiving pre-natal care |                   |                     |      |      | average expenditure incurred on pre-natal care (Rs.) |                     |     | per 1000 distribution of pregnant women by source of receiving post-natal care |                   |                     |      | average expenditure incurred on post-natal care (Rs.) |                   |                     | ever married pregnant women (15-49 yrs.) |                |        |
|                                 | not received                                                                  | received          |                     | n.r. | all  | from govt. source                                    | from private source | all | not received                                                                   | received          |                     | n.r. | all                                                   | from govt. source | from private source | all                                      | estd. no. (00) | sample |
|                                 |                                                                               | from govt. source | from private source |      |      |                                                      |                     |     |                                                                                | from govt. source | from private source |      |                                                       |                   |                     |                                          |                |        |
| (1)                             | (2)                                                                           | (3)               | (4)                 | (5)  | (6)  | (7)                                                  | (8)                 | (9) | (10)                                                                           | (11)              | (12)                | (13) | (14)                                                  | (15)              | (16)                | (17)                                     | (18)           | (19)   |
| 15 - 19                         | 235                                                                           | 504               | 255                 | 6    | 1000 | 226                                                  | 998                 | 486 | 380                                                                            | 308               | 310                 | 3    | 1000                                                  | 222               | 571                 | 397                                      | 18363          | 618    |
| 20 - 24                         | 289                                                                           | 425               | 285                 | 1    | 1000 | 247                                                  | 950                 | 529 | 361                                                                            | 286               | 344                 | 10   | 1000                                                  | 219               | 626                 | 441                                      | 73625          | 2622   |
| 25 - 29                         | 283                                                                           | 441               | 271                 | 5    | 1000 | 203                                                  | 901                 | 469 | 372                                                                            | 290               | 326                 | 12   | 1000                                                  | 306               | 483                 | 400                                      | 49172          | 1826   |
| 30 - 34                         | 324                                                                           | 411               | 261                 | 4    | 1000 | 234                                                  | 941                 | 509 | 373                                                                            | 248               | 371                 | 7    | 1000                                                  | 187               | 511                 | 381                                      | 26565          | 908    |
| 35 - 39                         | 434                                                                           | 332               | 234                 | 0    | 1000 | 112                                                  | 855                 | 419 | 404                                                                            | 244               | 351                 | 1    | 1000                                                  | 132               | 319                 | 242                                      | 10381          | 371    |
| 40 - 44                         | 420                                                                           | 291               | 288                 | 0    | 1000 | 678                                                  | 356                 | 518 | 496                                                                            | 206               | 294                 | 5    | 1000                                                  | 139               | 567                 | 391                                      | 3359           | 123    |
| 45 - 49                         | 641                                                                           | 109               | 249                 | 1    | 1000 | 328                                                  | 348                 | 342 | 506                                                                            | 134               | 350                 | 10   | 1000                                                  | 67                | 211                 | 171                                      | 2055           | 69     |
| all                             | 302                                                                           | 424               | 272                 | 3    | 1000 | 230                                                  | 918                 | 499 | 374                                                                            | 277               | 340                 | 9    | 1000                                                  | 232               | 541                 | 402                                      | 183521         | 6537   |

Table (51): (i) Per 1000 distribution of ever married pregnant women (15 - 49 yrs.) during last 365 days, by source of receiving pre-natal care, (ii) per 1000 distribution of ever married pregnant women (15 - 49 yrs.) who gave child birth by source of receiving post-natal care, and (iii) average expenditure on pre-natal care and post-natal care by type of institution for each age-group

| all-India                       |                                                                               |                   |                     |      |      |                                                      |                     |      |                                                                                |                   |                     |      |                                                       |                   |                     |                                          | Urban          |        |
|---------------------------------|-------------------------------------------------------------------------------|-------------------|---------------------|------|------|------------------------------------------------------|---------------------|------|--------------------------------------------------------------------------------|-------------------|---------------------|------|-------------------------------------------------------|-------------------|---------------------|------------------------------------------|----------------|--------|
| age-group of ever married women | per 1000 distribution of pregnant women by source of receiving pre-natal care |                   |                     |      |      | average expenditure incurred on pre-natal care (Rs.) |                     |      | per 1000 distribution of pregnant women by source of receiving post-natal care |                   |                     |      | average expenditure incurred on post-natal care (Rs.) |                   |                     | ever married pregnant women (15-49 yrs.) |                |        |
|                                 | not received                                                                  | received          |                     | n.r. | all  | from govt. source                                    | from private source | all  | not received                                                                   | received          |                     | n.r. | all                                                   | from govt. source | from private source | all                                      | estd. no. (00) | sample |
|                                 |                                                                               | from govt. source | from private source |      |      |                                                      |                     |      |                                                                                | from govt. source | from private source |      |                                                       |                   |                     |                                          |                |        |
| (1)                             | (2)                                                                           | (3)               | (4)                 | (5)  | (6)  | (7)                                                  | (8)                 | (9)  | (10)                                                                           | (11)              | (12)                | (13) | (14)                                                  | (15)              | (16)                | (17)                                     | (18)           | (19)   |
| 15 - 19                         | 188                                                                           | 403               | 408                 | 0    | 1000 | 193                                                  | 1637                | 920  | 372                                                                            | 256               | 372                 | 0    | 1000                                                  | 209               | 837                 | 581                                      | 3480           | 183    |
| 20 - 24                         | 149                                                                           | 400               | 445                 | 5    | 1000 | 353                                                  | 1345                | 875  | 253                                                                            | 322               | 411                 | 14   | 1000                                                  | 343               | 652                 | 516                                      | 22983          | 1289   |
| 25 - 29                         | 139                                                                           | 374               | 486                 | 1    | 1000 | 330                                                  | 1250                | 850  | 247                                                                            | 299               | 440                 | 14   | 1000                                                  | 341               | 778                 | 602                                      | 15966          | 1037   |
| 30 - 34                         | 199                                                                           | 352               | 449                 | 0    | 1000 | 460                                                  | 1835                | 1231 | 324                                                                            | 249               | 425                 | 2    | 1000                                                  | 666               | 1025                | 892                                      | 6281           | 410    |
| 35 - 39                         | 275                                                                           | 411               | 314                 | 0    | 1000 | 476                                                  | 1028                | 715  | 337                                                                            | 357               | 287                 | 19   | 1000                                                  | 251               | 786                 | 489                                      | 2075           | 152    |
| 40 - 44                         | 512                                                                           | 259               | 230                 | 0    | 1000 | 19                                                   | 1100                | 527  | 363                                                                            | 153               | 336                 | 149  | 1000                                                  | 410               | 1215                | 963                                      | 459            | 36     |
| 45 - 49                         | 302                                                                           | 292               | 406                 | 0    | 1000 | 1545                                                 | 745                 | 1080 | 275                                                                            | 354               | 371                 | 0    | 1000                                                  | 368               | 911                 | 646                                      | 347            | 20     |
| all                             | 164                                                                           | 385               | 448                 | 3    | 1000 | 356                                                  | 1377                | 905  | 271                                                                            | 302               | 414                 | 13   | 1000                                                  | 367               | 762                 | 595                                      | 51591          | 3127   |

1  
2  
3  
4  
5  
6  
7  
8  
9  
10  
11  
12  
13  
14  
15  
16  
17  
18  
19  
20  
21  
22  
23  
24  
25  
26  
27  
28  
29  
30  
31  
32  
33  
34  
35  
36  
37  
38  
39  
40  
41  
42  
43  
44  
45  
46  
47

Table (51): (i) Per 1000 distribution of ever married pregnant women (15 - 49 yrs.) during last 365 days, by source of receiving pre-natal care, (ii) per 1000 distribution of ever married pregnant women (15 - 49 yrs.) who gave child birth by source of receiving post-natal care, and (iii) average expenditure on pre-natal care and post-natal care by type of institution for each age-group

| all-India                       |                                                                               |                   |                     |      |      |                                                      |                     |     |                                                                                |                   |                     |      |                                                       |                   |                     |                                          | Rural + Urban  |         |
|---------------------------------|-------------------------------------------------------------------------------|-------------------|---------------------|------|------|------------------------------------------------------|---------------------|-----|--------------------------------------------------------------------------------|-------------------|---------------------|------|-------------------------------------------------------|-------------------|---------------------|------------------------------------------|----------------|---------|
| age-group of ever married women | per 1000 distribution of pregnant women by source of receiving pre-natal care |                   |                     |      |      | average expenditure incurred on pre-natal care (Rs.) |                     |     | per 1000 distribution of pregnant women by source of receiving post-natal care |                   |                     |      | average expenditure incurred on post-natal care (Rs.) |                   |                     | ever married pregnant women (15-49 yrs.) |                |         |
|                                 | not received                                                                  | received          |                     | n.r. | all  | from govt. source                                    | from private source | all | not received                                                                   | received          |                     | n.r. | all                                                   | from govt. source | from private source | all                                      | estd. no. (00) | sam-ple |
|                                 |                                                                               | from govt. source | from private source |      |      |                                                      |                     |     |                                                                                | from govt. source | from private source |      |                                                       |                   |                     |                                          |                |         |
| (1)                             | (2)                                                                           | (3)               | (4)                 | (5)  | (6)  | (7)                                                  | (8)                 | (9) | (10)                                                                           | (11)              | (12)                | (13) | (14)                                                  | (15)              | (16)                | (17)                                     | (18)           | (19)    |
| 15 - 19                         | 227                                                                           | 488               | 280                 | 5    | 1000 | 222                                                  | 1147                | 559 | 379                                                                            | 300               | 319                 | 2    | 1000                                                  | 220               | 616                 | 424                                      | 21843          | 801     |
| 20 - 24                         | 256                                                                           | 419               | 323                 | 2    | 1000 | 271                                                  | 1079                | 623 | 336                                                                            | 294               | 359                 | 11   | 1000                                                  | 250               | 632                 | 460                                      | 96608          | 3911    |
| 25 - 29                         | 248                                                                           | 425               | 323                 | 4    | 1000 | 231                                                  | 1030                | 576 | 341                                                                            | 292               | 354                 | 13   | 1000                                                  | 315               | 573                 | 456                                      | 65138          | 2863    |
| 30 - 34                         | 300                                                                           | 400               | 297                 | 3    | 1000 | 272                                                  | 1199                | 667 | 364                                                                            | 248               | 381                 | 6    | 1000                                                  | 275               | 616                 | 482                                      | 32846          | 1318    |
| 35 - 39                         | 407                                                                           | 345               | 247                 | 0    | 1000 | 184                                                  | 892                 | 479 | 393                                                                            | 263               | 341                 | 4    | 1000                                                  | 158               | 382                 | 285                                      | 12456          | 523     |
| 40 - 44                         | 431                                                                           | 287               | 281                 | 0    | 1000 | 607                                                  | 429                 | 519 | 481                                                                            | 200               | 299                 | 21   | 1000                                                  | 162               | 649                 | 454                                      | 3818           | 159     |
| 45 - 49                         | 592                                                                           | 135               | 272                 | 1    | 1000 | 708                                                  | 434                 | 525 | 474                                                                            | 165               | 353                 | 8    | 1000                                                  | 157               | 314                 | 264                                      | 2402           | 89      |
| all                             | 271                                                                           | 415               | 310                 | 3    | 1000 | 256                                                  | 1064                | 601 | 352                                                                            | 283               | 356                 | 10   | 1000                                                  | 263               | 596                 | 449                                      | 235113         | 9664    |

## Note on Sample Design and Estimation Procedure

### 1.0 Introduction

1.1 The National Sample Survey (NSS), set up by the Government of India in 1950 to collect socio-economic data employing scientific sampling methods, started its sixtieth round from 1<sup>st</sup> January 2004.

1.2 Sixtieth round of NSS was earmarked for survey on 'Household Consumer Expenditure', 'Employment and Unemployment' and 'Morbidity and Health care'. Survey on household consumer expenditure was conducted as a part of annual series of data on the subject. Two types of schedule on annual household consumer expenditure were canvassed in the current round. For information on employment-unemployment situation, a separate schedule was canvassed. Information relating to morbidity, problems of aged persons, utilisation of health care services and expenditure on medical treatment were collected through 'Morbidity and Health Care' schedule.

2.1 **Subject Coverage:** The 60<sup>th</sup> round (January-June 2004) of NSS covered annual survey of consumer expenditure, employment-unemployment situation and morbidity and health care. In this round a separate schedule was canvassed for employment and unemployment.

2.2 **Geographical coverage:** The survey covered the whole of the Indian Union *except* (i) Leh (Ladakh) and Kargil districts of Jammu & Kashmir, (ii) interior villages of Nagaland situated beyond five kilometres of the bus route and (iii) villages in Andaman and Nicobar Islands which remain inaccessible throughout the year.

2.3 **Period of survey and work programme:** The period of survey was of six months duration starting on 1<sup>st</sup> January 2004 and ending on 30<sup>th</sup> June 2004. The survey period of this round had been divided into two sub-rounds of three months duration each as follows:

sub-round 1 : January - March 2004  
sub-round 2 : April - June 2004

In each of these two sub-rounds equal number of sample villages/blocks (FSUs) had been allotted for survey with a view to ensuring uniform spread of sample FSUs over the entire survey period. Attempt had been made to survey each of the FSUs during the sub-round to which it was allotted. *Because of the arduous field conditions, this restriction could not be strictly enforced in Andaman and Nicobar Islands, Lakshadweep, rural areas of Arunachal Pradesh and Nagaland.*

2.4 **Schedules of enquiry:** During this round, the following schedules of enquiry were canvassed:

Schedule 0.0 : list of households  
Schedule 1.0 : consumer expenditure  
Schedule 10 : employment and unemployment  
Schedule 25.0 : morbidity and health care



It was decided that two types of Schedule 1.0 viz. Schedule Type 1 and Schedule Type 2 would be canvassed in this round. Schedule Type 1 was same as Schedule 1.0 of last few rounds including that of NSS 59<sup>th</sup> round. Schedule Type 2 had different reference period (7 days) for some items of food, pan, tobacco and intoxicants as compared to 30 days for block 6, Schedule Type 1.

**2.5 Participation of States:** In this round all the States and Union Territories except Andaman & Nicobar Islands, Dadra & Nagar Haveli and Lakshadweep participated at least on an equal matching basis. The following was the matching pattern of the participating States/UTs.

|                         |                |
|-------------------------|----------------|
| Nagaland (U)            | : triple       |
| J & K , Manipur & Delhi | : double       |
| Goa, Maharashtra (U)    | : one and half |
| Remaining States/UTs    | : equal        |

### 3.0 Sample Design

**3.1 Outline of sample design:** A stratified multi-stage design had been adopted for the 60<sup>th</sup> round survey. The first stage units (FSU) were the 1991 census villages in the rural sector and Urban Frame Survey (UFS) blocks in the urban sector. The ultimate stage units (USU) were households in both the sectors. In case of large villages/blocks requiring hamlet-group (hg)/sub-block (sb) formation, one intermediate stage was the selection of two hgs/sbs from each FSU.

**3.2 Sampling Frame for First Stage Units:** *For the rural sector*, the list of Census 1991 villages (panchayat wards for Kerala and Census 1981 villages for J & K) constituted the sampling frame. *For the urban sector*, the list of latest available Urban Frame Survey (UFS) blocks had been considered as the sampling frame.

### 3.3 Stratification

**3.3.1 Rural sector:** Two *special strata* were formed at the State/ UT level, viz.

Stratum 1: all FSUs with population between 0 to 50 and

Stratum 2: FSUs with population more than 15,000 as per census 1991.

Special stratum 1 had been formed if at least 50 such FSUs were found in a State/UT. Similarly, special stratum 2 had been formed if at least 4 such FSUs were found in a State/UT. Otherwise, such FSUs were merged with the general strata.

From FSUs other than those covered under special strata 1 and 2, *general strata* were formed and its numbering started from 3. Each district of a State/UT was normally treated as a separate stratum. However, if the census rural population of the district was greater than or equal to 2.5 million as per population census 2001 or 2 million as per population census 1991, the district had been split into two or more strata, by grouping contiguous tehsils to form strata. However, in Gujarat, some districts were not wholly included in an NSS region. In such cases, the part of the district falling in an NSS region constituted a separate stratum.

1  
2  
3  
4  
5  
6  
7  
8  
9  
10  
11  
12  
13  
14  
15  
16  
17  
18  
19  
20  
21  
22  
23  
24  
25  
26  
27  
28  
29  
30  
31  
32  
33  
34  
35  
36  
37  
38  
39  
40  
41  
42  
43  
44  
45  
46  
47  
48  
49  
50  
51  
52  
53  
54  
55  
56  
57  
58  
59  
60

3.3.2 **Urban sector:** In the urban sector, strata were formed within each NSS region on the basis of size class of towns as per Population Census 2001. The stratum numbers and their composition (within each region) are given below.

|                      |                                                                  |
|----------------------|------------------------------------------------------------------|
| stratum 1 :          | all towns with population less than 50,000                       |
| stratum 2 :          | all towns with population 50,000 or more but less than 2 lakhs   |
| stratum 3 :          | all towns with population 2 lakhs or more but less than 10 lakhs |
| stratum 4, 5, 6,...: | each town with population 10 lakhs or more                       |

The stratum numbers had been kept as above even if, in some regions, some of the strata were not formed.

**3.4 Total sample size (FSUs):** 7612 FSUs were allocated at all-India level on the basis of investigator strength in different States/UTs for central sample and 8188 for state sample.

**3.5 Allocation of total sample to States and UTs:** The total number of sample FSUs was allocated to the States and UTs in proportion to provisional population as per Census 2001 subject to the availability of investigators ensuring more or less uniform work-load.

**3.6 Allocation of State/UT level sample to rural and urban sectors:** State/UT level sample had been allocated between two sectors in proportion to provisional population as per *Census 2001* with 1.5 weightage to urban sector subject to the restriction that urban sample size for bigger states like Maharashtra, Tamil Nadu etc. would not exceed the rural sample size. Earlier practice of giving double weightage to urban sector was modified considering the fact that there had been considerable growth in urban population. A minimum of 8 FSUs was allocated to each state/UT separately for rural and urban areas.

The sample sizes by sector and State/UT are given in the Appendix Table 1.

**3.7 Allocation to strata:** Within each sector of a State/UT, the respective sample size had been allocated to the different strata in proportion to the stratum population as per census 2001. Allocations at stratum level were adjusted to a multiple of 4 with a minimum sample size of 4.

**3.8 Selection of FSUs:** FSUs were selected with Probability Proportional to Size With Replacement (PPSWR), size being the population as per Population Census 1991 in all the strata for rural sector except for stratum 1. In stratum 1 of rural sector and in all the strata of urban sector, selection was done using Simple Random Sampling Without Replacement (SRSWOR). Within each stratum, samples had been drawn in the form of two independent sub-samples in both the rural and urban sectors.

### **3.9 Selection of hamlet-groups/sub-blocks/households**

3.9.1 **Criterion for hamlet-group/sub-block formation:** Large villages/blocks having approximate population of 1200 or more were divided into a suitable number (say, D) of 'hamlet-groups' in the rural sector and 'sub-blocks' in the urban sector as stated below.

| approximate present population<br>of the sample village/block | no. of hgs/sbs to<br>be formed (D) |
|---------------------------------------------------------------|------------------------------------|
| less than 1200 (no hamlet-groups/sub-blocks)                  | 1                                  |
| 1200 to 1799                                                  | 3                                  |
| 1800 to 2399                                                  | 4                                  |
| 2400 to 2999                                                  | 5                                  |
| 3000 to 3599                                                  | 6                                  |
| .....and so on                                                |                                    |

For rural areas of Himachal Pradesh, Sikkim and Poonch, Rajouri, Udhampur, Doda districts of Jammu and Kashmir and Idukki district of Kerala, the number of hamlet-groups were formed as follows.

| approximate present population<br>of the sample village | no. of hgs to<br>be formed |
|---------------------------------------------------------|----------------------------|
| less than 600 (no hamlet-groups)                        | 1                          |
| 600 to 899                                              | 3                          |
| 900 to 1199                                             | 4                          |
| 1200 to 1499                                            | 5                          |
| .....and so on                                          |                            |

Two hamlet-groups/sub-blocks were selected from a large village/UFS block, wherever hamlet-groups/sub-blocks were formed, by SRSWOR. Listing and selection of the households were done independently in the two selected hamlet-groups/sub-blocks.

#### 4.0 Formation of Second Stage Strata and allocation of households:

**4.1 Schedule 25.0:** In each selected village/block/hamlet-group/sub-block, four second stage strata (SSS) were formed as given below.

| composition of SSS                                                                                 | number of households to be surveyed<br>for schedule 25.0 |                                          |
|----------------------------------------------------------------------------------------------------|----------------------------------------------------------|------------------------------------------|
|                                                                                                    | without hg/sb<br>formation                               | with hg/sb formation<br>(for each hg/sb) |
| SSS 1: households with at least one member hospitalised during last 365 days                       | 4                                                        | 2                                        |
| SSS 2: from the remaining households, households having at least one child of age below 5 years    | 2                                                        | 1                                        |
| SSS 3: from the remaining households, households with at least one member of age 60 years or above | 2                                                        | 1                                        |
| SSS 4: other households                                                                            | 2                                                        | 1                                        |

4.2 **Selection of households:** From each SSS the sample households for all the schedules were selected by SRSWOR. If a household was selected for more than one schedule only one schedule was canvassed in that household in the priority order of Schedule 1.0, Schedule 10 and Schedule 25.0 and in that case the household was replaced for the other schedule. If a household had been selected for Schedule 1.0, it was not again selected for Schedule 10 or Schedule 25.0. Similarly, if a household had not been selected for Schedule 1.0 but selected for Schedule 10, it was not selected for Schedule 25.0. However, for the households selected from SSS1 of Schedule 25.0, the Schedule 25.0 was canvassed even if the household had been selected for other schedules.

## 5. Estimation Procedure

### 5.1 Notations:

s = subscript for s-th stratum

m = subscript for sub-sample (m = 1, 2)

i = subscript for i-th FSU [village (panchayat ward) / block]

d = subscript for a hamlet-group/sub-block (d = 1, 2)

j = subscript for j-th second stage stratum in an FSU/ hg/sb

k = subscript for k-th sample household under a particular second stage stratum within an FSU/ hg/sb

D = total number of hg's/sb's formed in the sample village (panchayat ward) / block

$D^* = 1$  if  $D = 1$

$= D / 2$  for FSUs with  $D > 1$

N = total number of FSUs in rural stratum 1 or in any urban stratum

Z = total size of a rural stratum other than stratum 1 (= sum of sizes for all the FSUs of a rural stratum other than stratum 1)

z = size of sample village used for selection.

n = number of sample village / block surveyed including zero cases but excluding casualty for a particular sub-sample and stratum.

H = total number of households listed in a second-stage stratum of a hamlet-group/sub-block of sample FSU

h = number of households surveyed in a second-stage stratum of a hamlet-group/sub-block of sample FSU

x, y = observed value of characteristics x, y under estimation

$\hat{X}$ ,  $\hat{Y}$  = estimate of population total X, Y for the characteristics x, y

Under the above symbols,

$y_{smidjk}$  = observed value of the characteristic y for the k-th household in the j-th second stage stratum of the d-th hg/sb (d = 1, 2) of the i-th FSU belonging to the m-th sub-sample for the s-th stratum;

However, for ease of understanding, a few symbols have been suppressed in following paragraphs where they are obvious.

## 5.2 Formulae for Estimation of Aggregates for a particular Sub-sample and Stratum in Rural / Urban sector:

### Schedules 25.0:

#### Rural:

(a) Estimation formula for stratum 1:

(i) For households selected in j-th second stage stratum:

$$\hat{Y}_j = \frac{N}{n_j} \sum_{i=1}^{n_j} D_i^* \left[ \frac{H_{i1j}}{h_{i1j}} \sum_{k=1}^{h_{i1j}} y_{i1jk} + \frac{H_{i2j}}{h_{i2j}} \sum_{k=1}^{h_{i2j}} y_{i2jk} \right]$$

(ii) For all selected households:

$$\hat{Y} = \sum_j \hat{Y}_j$$

(b) Estimation formula for other strata:

(i) For households selected in j-th second stage stratum:

$$\hat{Y}_j = \frac{Z}{n_j} \sum_{i=1}^{n_j} \frac{1}{z_i} D_i^* \left[ \frac{H_{i1j}}{h_{i1j}} \sum_{k=1}^{h_{i1j}} y_{i1jk} + \frac{H_{i2j}}{h_{i2j}} \sum_{k=1}^{h_{i2j}} y_{i2jk} \right]$$

(ii) For all selected households:

$$\hat{Y} = \sum_j \hat{Y}_j$$

#### Urban:

(a) Estimation formula for a stratum:

(i) For households selected in j-th second stage stratum:

$$\hat{Y}_j = \frac{N}{n_j} \sum_{i=1}^{n_j} D_i^* \left[ \frac{H_{i1j}}{h_{i1j}} \sum_{k=1}^{h_{i1j}} y_{i1jk} + \frac{H_{i2j}}{h_{i2j}} \sum_{k=1}^{h_{i2j}} y_{i2jk} \right]$$

(ii) For all selected households:

$$\hat{Y} = \sum_j \hat{Y}_j$$

Note: Values of  $j = 1, 2, 3$  or  $4$

### 5.3 Overall Estimate for Aggregates:

Overall estimate for aggregates for a stratum ( $\hat{Y}_s$ ) based on two sub-samples is obtained as:

$$\hat{Y}_s = \frac{1}{2} \sum_{m=1}^2 \hat{Y}_{sm}$$

### 5.4 Overall Estimate of Aggregates at State/UT/all-India level:

The overall estimate  $\hat{Y}$  at the State/ UT/ all-India level is obtained by summing the stratum estimates  $\hat{Y}_s$  over all strata belonging to the State/ UT/ all-India.

### 5.5 Estimates of Ratios:

Let  $\hat{Y}$  and  $\hat{X}$  be the overall estimate of the aggregates Y and X for two characteristics y and x respectively at the State/ UT/ all-India level.

Then the combined ratio estimate ( $\hat{R}$ ) of the ratio ( $R = \frac{Y}{X}$ ) will be obtained as

$$\hat{R} = \frac{\hat{Y}}{\hat{X}}$$

### 5.6 Estimates of Error:

The estimated variances of the above estimates will be as follows:

A) For aggregate  $\hat{Y}$ :

$$V\hat{a}r(\hat{Y}) = \sum_s V\hat{a}r(\hat{Y}_s)$$

where  $V\hat{a}r(\hat{Y}_s)$  are as given below.

a) For strata with PPSWR selection at first stage (i.e. for all rural strata except stratum 1):

$$V\hat{a}r_{ppswr}(\hat{Y}_s) = \sum_j V\hat{a}r_{ppswr}(\hat{Y}_{sj})$$

$$\text{where } V\hat{a}r_{ppswr}(\hat{Y}_{sj}) = \frac{1}{n_{sj}(n_{sj} - 1)} \left[ \sum_{i=1}^{n_{sj}} \frac{Z_{si}^2 \hat{Y}_{sij}^2}{Z_{si}^2} - n_{sj} \hat{Y}_{sj}^2 \right],$$

$$\hat{Y}_{sij} = D_{si}^* \left[ \frac{H_{i1j}}{h_{i1j}} \sum_{k=1}^{h_{i1j}} y_{i1jk} + \frac{H_{i2j}}{h_{i2j}} \sum_{k=1}^{h_{i2j}} y_{i2jk} \right]$$

b) For strata with SRSWOR selection at first stage (i.e. for rural stratum 1 and all urban strata):

$$Var_{srswor}(\hat{Y}_s) = \frac{1}{4} (\hat{Y}_{s1} - \hat{Y}_{s2})^2,$$

where  $\hat{Y}_{s1}$  and  $\hat{Y}_{s2}$  are the estimates for sub-sample 1 and sub-sample 2 respectively for stratum 's'.

B) For ratio  $\hat{R}$ :

$$M\hat{S}E(\hat{R}) = \frac{1}{(\hat{X})^2} \left[ \sum_s M\hat{S}E_s(\hat{R}) + \sum_{s'} M\hat{S}E_{s'}(\hat{R}) \right]$$

where s, s' indicate respectively the strata with PPSWR and SRSWOR selection at first stage.

a) For strata with PPSWR selection at first stage (i.e. for all rural strata except stratum 1):

$$M\hat{S}E_s(\hat{R}) = \frac{1}{n_s(n_s - 1)} \sum_{i=1}^{n_s} \left[ \frac{Z_s}{Z_{si}} (\hat{Y}_{si} - \hat{R}\hat{X}_{si}) - \frac{1}{n_s} \sum_{i=1}^{n_s} \frac{Z_s}{Z_{si}} (\hat{Y}_{si} - \hat{R}\hat{X}_{si}) \right]^2$$

where

$$\hat{Y}_{si} = \sum_j \hat{Y}_{sij}, \quad \hat{X}_{si} = \sum_j \hat{X}_{sij},$$

$$\hat{Y}_{sij} = D_{si}^* \left[ \frac{H_{si1j}}{h_{si1j}} \sum_{k=1}^{h_{si1j}} y_{si1jk} + \frac{H_{si2j}}{h_{si2j}} \sum_{k=1}^{h_{si2j}} y_{si2jk} \right],$$

$$\hat{X}_{sij} = D_{si}^* \left[ \frac{H_{si1j}}{h_{si1j}} \sum_{k=1}^{h_{si1j}} x_{si1jk} + \frac{H_{si2j}}{h_{si2j}} \sum_{k=1}^{h_{si2j}} x_{si2jk} \right]$$

b) For strata with SRSWOR selection at first stage (i.e. for rural stratum 1 and all urban strata):



$$M\hat{S}E_{s'}(\hat{R}) = \frac{1}{4} \left[ (\hat{Y}_{s'1} - \hat{Y}_{s'2})^2 + \hat{R}^2 (\hat{X}_{s'1} - \hat{X}_{s'2})^2 - 2\hat{R}(\hat{Y}_{s'1} - \hat{Y}_{s'2})(\hat{X}_{s'1} - \hat{X}_{s'2}) \right]$$

C) Estimates of RSE:

$$R\hat{S}E(\hat{Y}) = \frac{\sqrt{V\hat{a}r(\hat{Y})}}{\hat{Y}} \times 100$$

$$R\hat{S}E(\hat{R}) = \frac{\sqrt{M\hat{S}E(\hat{R})}}{\hat{R}} \times 100$$

### 6.0 Multipliers:

The formulae for multipliers for a sub-sample and schedule 25.0 are given below:

| stratum                              | formula for multipliers                                                                                               |                                                                                                                       |
|--------------------------------------|-----------------------------------------------------------------------------------------------------------------------|-----------------------------------------------------------------------------------------------------------------------|
|                                      | hg / sb 1                                                                                                             | hg / sb 2                                                                                                             |
| rural stratum 1 and all urban strata | $\frac{N_s}{n_{smj}} \times D_{smi}^* \times \frac{H_{smi1j}}{h_{smi1j}},$<br>j = 1, 2, 3, 4                          | $\frac{N_s}{n_{smj}} \times D_{smi}^* \times \frac{H_{smi2j}}{h_{smi2j}},$<br>j = 1, 2, 3, 4                          |
| rural s ≠ 1                          | $\frac{Z_s}{n_{smj}} \times \frac{1}{z_{smi}} \times D_{smi}^* \times \frac{H_{smi1j}}{h_{smi1j}},$<br>j = 1, 2, 3, 4 | $\frac{Z_s}{n_{smj}} \times \frac{1}{z_{smi}} \times D_{smi}^* \times \frac{H_{smi2j}}{h_{smi2j}},$<br>j = 1, 2, 3, 4 |

- Note:
- (i) For estimating any characteristic for any domain not specifically considered in sample design, indicator variable may be used.
  - (ii) Multipliers have to be computed on the basis of information available in the listing schedule irrespective of any misclassification observed between the listing schedule and detailed enquiry schedule.
  - (iii) For estimating number of villages possessing a characteristics,  $D_{smi}^* = 1$  in the relevant multipliers and there will be only one multiplier for the village.

### 7.0 Treatment for zero cases, casualty cases etc.:

7.1 While counting the number of FSUs surveyed ( $n_{sm}$ ) in a stratum, all the FSUs with survey codes 1 to 6 in schedule 0.0 will be considered. In addition, for a particular schedule if no USU is available in the frame then also that FSU will be treated as surveyed in respect of that schedule. However, if the USUs of a particular schedule type are available in the frame of the FSU but none of these could be surveyed then that FSU has to be treated as casualty and it will not be treated as surveyed in respect of that schedule.



7.2 *Casualty cases*: FSUs with survey code 7 as per schedule 0.0 are treated as casualties. In addition to this, an FSU, although surveyed, may have to be treated as casualty for a particular schedule type and a particular *second stage stratum* as given in the following para:

7.2.1 FSUs with survey codes 1 and 4 as per schedule 0.0 having number of households in the frame of j-th second stage stratum greater than 0 but number of households surveyed according to data file, considering both hg/sb together, as nil (i.e.  $H_{i1j} + H_{i2j} > 0$  but  $h_{i1j} + h_{i2j} = 0$ ) will be taken as casualties for j-th second stage stratum.

*All the FSUs with survey codes 1 to 6 as per schedule 0.0 minus the number of casualties as identified above will be taken as the number of surveyed FSUs ( $n_{mj}$ ) for that stratum  $\times$  second stage stratum.*

When casualty for j-th second stage stratum occurs for a particular hg/sb but not for the other hg/sb, the FSU will not be treated as casualty but some adjustments in the value of H for the other hg/sb will be done as follows:

(i) Suppose for hg/sb 1,  $H_{i1j} > 0$  but  $h_{i1j} = 0$  while for hg/sb 2,  $H_{i2j} > 0$  and  $h_{i2j} > 0$ . In that case  $D_i^* \times H_{i2j}$  will be replaced by  $D_i^* \times (H_{i1j} + H_{i2j})$  in the formula for multiplier of segment 2.

(ii) Suppose for hg/sb 1,  $H_{i1j} > 0$  and  $h_{i1j} > 0$  while for hg/sb 2,  $H_{i2j} > 0$  but  $h_{i2j} = 0$ . In that case  $D_i^* \times H_{i1j}$  will be replaced by  $D_i^* \times (H_{i1j} + H_{i2j})$  in the formula for multiplier of hg/sb 1.

It may be noted that  $n_{smj}$  would be same for hg/sb 1 & 2 of an FSU.

## 8.0 Treatment in cases of void second-stage strata/sub-strata /strata/NSS region at FSU or household level

8.1 A stratum may be void because of the casualty of all the FSUs belonging to the stratum. This may occur in one sub-sample or in both the sub-samples. If it relates to only one sub-sample, then estimate for the void stratum may be replaced with the estimate as obtained from the other sub-sample for the same stratum.

8.2 When a stratum is void in both the sub-samples, the following procedure is recommended:

*Case(I): Stratum void cases at FSU levels (i.e. all FSUs having survey code 7):*

i) If a rural stratum, except stratum 1, is void then it may be merged with a similar stratum within the same NSS region. However, if rural stratum 1 is void for any State/UT, it will not be merged with other stratum and remarks to that effect may be added in appropriate places.

ii) If an urban stratum is void then it may be merged with another stratum within the same NSS region

iii) If all the strata within an NSS region is void, it may be excluded from the coverage of the survey. The state level estimates will be based on the estimates of NSS regions for which estimates are available and remarks to that effect may be added in appropriate places.

1  
2  
3  
4  
5  
6  
7  
8  
9  
10  
11  
12  
13  
14  
15  
16  
17  
18  
19  
20  
21  
22  
23  
24  
25  
26  
27  
28  
29  
30  
31  
32  
33  
34  
35  
36  
37  
38  
39  
40  
41  
42  
43  
44  
45  
46  
47  
48  
49  
50  
51  
52  
53  
54  
55  
56  
57  
58  
59  
60

*Case (II): Stratum void case at second stage stratum level (i.e. all the FSUs are casualties for a particular second stage stratum):*

An FSU may be a casualty for a particular *second stage stratum* although survey code is not 7. If all the FSUs of a stratum become casualties in this manner for a particular *second stage stratum*, the stratum will become void. The adjustment for this type of stratum void case may be done according to the following guidelines.

The adjustment will be made involving other strata (within NSS region) of the State/U.T. Suppose A, B, C, and D are the four strata in the State/UT/Region and stratum C is void for j-th *second stage stratum*. If  $\hat{Y}_{aj}$ ,  $\hat{Y}_{bj}$  and  $\hat{Y}_{dj}$  are the aggregate estimates for the strata A, B and D respectively, then the estimate  $\hat{Y}_{cj}$  for stratum C may be obtained as  $\left( \frac{\hat{Y}_{aj} + \hat{Y}_{bj} + \hat{Y}_{dj}}{Z_a + Z_b + Z_d} \times Z_c \right)$  where  $Z_a$ ,  $Z_b$ ,  $Z_c$  and  $Z_d$  are the sizes of strata A, B, C and D respectively.

\*\*\*\*\*

|       |   |
|-------|---|
| RURAL | * |
| URBAN |   |

**GOVERNMENT OF INDIA  
NATIONAL SAMPLE SURVEY ORGANISATION  
SOCIO-ECONOMIC SURVEY  
SIXTIETH ROUND: JANUARY – JUNE, 2004**

|         |   |
|---------|---|
| CENTRAL | * |
| STATE   |   |

**SCHEDULE 25.0: MORBIDITY AND HEALTH CARE**

| [0] descriptive identification of sample household |                               |
|----------------------------------------------------|-------------------------------|
| 1. state/u.t.:                                     | 5. hamlet name:               |
| 2. district:                                       | 6. ward/inv. unit/block:      |
| 3. tehsil/town:                                    | 7. name of head of household: |
| 4. village name:                                   | 8. name of informant:         |

| [1] identification of sample household |                                   |      |   |   |          |                                                      |      |
|----------------------------------------|-----------------------------------|------|---|---|----------|------------------------------------------------------|------|
| item no.                               | item                              | code |   |   | item no. | item                                                 | code |
| 1.                                     | srl. no. of sample village/ block |      |   |   | 11.      | sub-sample                                           |      |
| 2.                                     | round number                      | 6    |   | 0 | 12.      | FOD sub-region                                       |      |
| 3.                                     | schedule number                   | 2    | 5 | 0 | 13.      | sample hamlet-group/sub-block number                 |      |
| 4.                                     | schedule type                     |      |   |   | 14.      | second stage stratum                                 |      |
| 5.                                     | sample (central-1, state-2)       |      |   |   | 15.      | sample household number                              |      |
| 6.                                     | sector (rural-1, urban-2)         |      |   |   | 16.      | srl. no. of informant (as in col.1, block 4)         |      |
| 7.                                     | state-region                      |      |   |   | 17.      | response code                                        |      |
| 8.                                     | district                          |      |   |   | 18.      | survey code                                          |      |
| 9.                                     | stratum number                    |      |   |   | 19.      | reason for substitution of original household (code) |      |
| 10.                                    | sub-round                         |      |   |   |          |                                                      |      |

**CODES FOR BLOCK 1**

item 17: **response code:** informant: co-operative and capable -1, co-operative but not capable - 2, busy -3, reluctant - 4, others - 9

item 18: **survey code:** original – 1, substitute – 2, casualty – 3

item 19: **reason for substitution of original household:** informant busy - 1, members away from home - 2, informant non-cooperative -3, others - 9

\* tick mark ( ✓ ) may be put in the appropriate place.

| [2] particulars of field operation |                                                    |              |    |    |                          |    |    |                |    |    |  |  |
|------------------------------------|----------------------------------------------------|--------------|----|----|--------------------------|----|----|----------------|----|----|--|--|
| srl.no.                            | item                                               | investigator |    |    | assistant superintendent |    |    | superintendent |    |    |  |  |
| (1)                                | (2)                                                | (3)          |    |    | (4)                      |    |    | (5)            |    |    |  |  |
| 1.                                 | (i) name (block letters)                           |              |    |    |                          |    |    |                |    |    |  |  |
|                                    | (ii) code                                          |              |    |    |                          |    |    |                |    |    |  |  |
| 2.                                 | <b>date(s) of:</b>                                 | DD           | MM | YY | DD                       | MM | YY | DD             | MM | YY |  |  |
|                                    | (i) survey/ inspection                             |              |    |    |                          |    |    |                |    |    |  |  |
|                                    | (ii) receipt                                       |              |    |    |                          |    |    |                |    |    |  |  |
|                                    | (iii) scrutiny                                     |              |    |    |                          |    |    |                |    |    |  |  |
|                                    | (iv) despatch                                      |              |    |    |                          |    |    |                |    |    |  |  |
| 3.                                 | number of additional sheets attached               |              |    |    |                          |    |    |                |    |    |  |  |
| 4.                                 | total time taken to canvass Sch. 25.0 (in minutes) |              |    |    |                          |    |    |                |    |    |  |  |
| 5.                                 | signature                                          |              |    |    |                          |    |    |                |    |    |  |  |

|                                     |
|-------------------------------------|
| <b>[12] remarks by investigator</b> |
|                                     |

|                                                |
|------------------------------------------------|
| <b>[13] comments by supervisory officer(s)</b> |
|                                                |

1  
2  
3  
4  
5  
6  
7  
8  
9  
10  
11  
12  
13  
14  
15  
16  
17  
18  
19  
20  
21  
22  
23  
24  
25  
26  
27  
28  
29  
30  
31  
32  
33  
34  
35  
36  
37  
38  
39  
40  
41  
42  
43  
44  
45  
46  
47  
48  
49  
50  
51  
52  
53  
54  
55  
56  
57  
58  
59  
60

| [3] household characteristics                     |  |                |  |                                                                        |  |                                                        |  |  |  |
|---------------------------------------------------|--|----------------|--|------------------------------------------------------------------------|--|--------------------------------------------------------|--|--|--|
| 1. household size                                 |  |                |  | 11. major source of drinking water (code)                              |  |                                                        |  |  |  |
| 2. principal industry (NIC-1998)                  |  | description:   |  |                                                                        |  | 12. is water treated before drinking? (yes - 1, no -2) |  |  |  |
|                                                   |  | code (5-digit) |  |                                                                        |  | 13. if 1 in item 12, type of water treatment (code)    |  |  |  |
| 3. principal occupation (NCO-1968)                |  | description:   |  |                                                                        |  | 14. primary source of energy for cooking (code)        |  |  |  |
|                                                   |  | code (3-digit) |  |                                                                        |  | 15. is there any pet animal? (yes-1, no-2)             |  |  |  |
| 4. household type (code)                          |  |                |  | <b>household consumer expenditure (Rs) during last 30 days out of:</b> |  |                                                        |  |  |  |
| 5. religion (code)                                |  |                |  |                                                                        |  |                                                        |  |  |  |
| 6. social group (code)                            |  |                |  | 16. purchase                                                           |  |                                                        |  |  |  |
| 7. land possessed as on the date of survey (code) |  |                |  | 17. home-produced stock                                                |  |                                                        |  |  |  |
|                                                   |  |                |  | 18. receipts in exchange of goods and services                         |  |                                                        |  |  |  |
| 8. type of structure (code)                       |  |                |  | 19. gifts and loans                                                    |  |                                                        |  |  |  |
| 9. type of latrine (code)                         |  |                |  | 20. free collection                                                    |  |                                                        |  |  |  |
| 10. type of drainage (code)                       |  |                |  | 21. total (items 16 to 20)                                             |  |                                                        |  |  |  |

**CODES FOR BLOCK 3**

item 4 - **household type**: for rural areas: self-employed in non-agriculture -1, agricultural labour-2, other labour -3, self-employed in agriculture - 4, others- 9

for urban areas: self-employed -1, regular wage/salary earnings - 2, casual labour -3, others - 9

item 5 - **religion**: Hinduism -1, Islam -2, Christianity -3, Sikhism -4, Jainism -5, Buddhism -6, Zoroastrianism -7, others -9

item 6 - **social group**: scheduled tribe-1, scheduled caste -2, other backward class -3, others- 9

item 7 - **land possessed (class interval in hectares)**: less than 0.005 -01, 0.005 to 0.01 -02, 0.02 to 0.20 -03, 0.21 to 0.40 -04, 0.41 to 1.00 -05, 1.01 to 2.00 -06, 2.01 to 3.00 -07, 3.01 to 4.00 -08, 4.01 to 6.00 -10, 6.01 to 8.00 -11, greater than 8.00 -12

item 8 - **type of structure**: structure: pucca - 1, semi-pucca -2, serviceable kutcha -3, unserviceable kutcha - 4; no structure - 5

item 9 - **type of latrine**: latrine: service - 1, pit - 2, septic tank/flush system - 3, others - 9; no latrine - 4

item 10 - **type of drainage**; drainage: open kutcha - 1, open pucca - 2, covered pucca - 3, under ground - 4; no drainage - 5

item 11 - **major source of drinking water**: bottled water - 1, tap - 2, tube-well/hand pump-3, tankers - 4, pucca well - 5, tank/pond reserved for drinking - 6, river/canal - 7, others - 9

item 13 - **type of water treatment**: ultra-violet/resin/reverse osmosis - 1, boiling - 2, filter - 3, cloth screen - 4, any disinfectant - 5, others - 9

item 14 - **primary source of energy for cooking**: coke, coal - 01, firewood and chips - 02, LPG - 03, gobar gas - 04, dung cake - 05, charcoal - 06, kerosene - 07, electricity - 08, others - 99; no cooking arrangement - 10

| [5] particulars of household members who died during last 365 days |                         |                         |                      |                                                       |                                    |                                           |                                |                                      |                             |                                  |
|--------------------------------------------------------------------|-------------------------|-------------------------|----------------------|-------------------------------------------------------|------------------------------------|-------------------------------------------|--------------------------------|--------------------------------------|-----------------------------|----------------------------------|
| srl. no.                                                           | name of deceased member | sex (male -1, female-2) | age at death (years) | medical attention received before death (yes-1, no-2) | whether hospitalised (yes-1, no-2) | if 1 in col. 6, no. of times hospitalised | if 2 in col. 3,                |                                      | annual amount paid (Rs) for |                                  |
|                                                                    |                         |                         |                      |                                                       |                                    |                                           | whether pregnant (yes-1, no-2) | if 1 in col. 8, time of death (code) | medical insurance premium   | health schemes (CGHS, ESI, etc.) |
| (1)                                                                | (2)                     | (3)                     | (4)                  | (5)                                                   | (6)                                | (7)                                       | (8)                            | (9)                                  | (10)                        | (11)                             |
| 91                                                                 |                         |                         |                      |                                                       |                                    |                                           |                                |                                      |                             |                                  |
| 92                                                                 |                         |                         |                      |                                                       |                                    |                                           |                                |                                      |                             |                                  |

**CODES FOR BLOCK 5**

col. 9 - **time of death**: for deaths relating to pregnancy/delivery/abortion: during pregnancy - 1, during delivery - 2, during abortion - 3; within 6 weeks of delivery/abortion - 4; other deaths - 9

1 Acre = 0.4047 Hectare; 1 Hectare = 10,000 sq metre

Report No. 507: Morbidity, Health Care and the Condition of the Aged, Jan.-June, 2004



| <b>[6] particulars of economic independence and ailments on the date of survey for persons aged 60 years and above</b> |                                                                                                        |  |  |  |  |  |  |  |  |
|------------------------------------------------------------------------------------------------------------------------|--------------------------------------------------------------------------------------------------------|--|--|--|--|--|--|--|--|
| 1.                                                                                                                     | srl. no. of member (as in col. 1, block 4)                                                             |  |  |  |  |  |  |  |  |
| 2.                                                                                                                     | age ( years ) (as in col. 5, block 4)                                                                  |  |  |  |  |  |  |  |  |
| 3.                                                                                                                     | number of sons living                                                                                  |  |  |  |  |  |  |  |  |
| 4.                                                                                                                     | number of daughters living                                                                             |  |  |  |  |  |  |  |  |
| 5.                                                                                                                     | state of economic independence (code)                                                                  |  |  |  |  |  |  |  |  |
| 6.                                                                                                                     | for 1 in item 5, no. of dependants                                                                     |  |  |  |  |  |  |  |  |
| 7.                                                                                                                     | for 2 or 3 in item 5, person financially supporting aged person (code)                                 |  |  |  |  |  |  |  |  |
| 8.                                                                                                                     | for 1 in item 5, amount of loan(s) outstanding (Rs)                                                    |  |  |  |  |  |  |  |  |
| 9.                                                                                                                     | living arrangement (code)                                                                              |  |  |  |  |  |  |  |  |
| 10.                                                                                                                    | if 1, 2 or 3 in item 9, whether child/ grandchild/sibling staying nearby (code)                        |  |  |  |  |  |  |  |  |
| 11.                                                                                                                    | physical mobility (code)                                                                               |  |  |  |  |  |  |  |  |
| 12.                                                                                                                    | if 1 or 2 in item 11, person helping (household member - 1, other than household member - 2, none - 3) |  |  |  |  |  |  |  |  |
| <b>ailments on the date of enquiry (code)</b>                                                                          |                                                                                                        |  |  |  |  |  |  |  |  |
| 13.                                                                                                                    | ailment 1 (code)                                                                                       |  |  |  |  |  |  |  |  |
| 14.                                                                                                                    | ailment 2 (code)                                                                                       |  |  |  |  |  |  |  |  |
| 15.                                                                                                                    | ailment 3 (code)                                                                                       |  |  |  |  |  |  |  |  |
| 16.                                                                                                                    | ailment 4 (code)                                                                                       |  |  |  |  |  |  |  |  |
| 17.                                                                                                                    | ailment 5 (code)                                                                                       |  |  |  |  |  |  |  |  |
| <b>whether any treatment taken for the ailments reported in items 13to 17 (yes-1, no-2)</b>                            |                                                                                                        |  |  |  |  |  |  |  |  |
| 18.                                                                                                                    | ailment 1                                                                                              |  |  |  |  |  |  |  |  |
| 19.                                                                                                                    | ailment 2                                                                                              |  |  |  |  |  |  |  |  |
| 20.                                                                                                                    | ailment 3                                                                                              |  |  |  |  |  |  |  |  |
| 21.                                                                                                                    | ailment 4                                                                                              |  |  |  |  |  |  |  |  |
| 22.                                                                                                                    | ailment 5                                                                                              |  |  |  |  |  |  |  |  |
| 23.                                                                                                                    | own perception about current state of health (code)                                                    |  |  |  |  |  |  |  |  |
| 24.                                                                                                                    | own perception about relative state of health (code)                                                   |  |  |  |  |  |  |  |  |

**CODES FOR BLOCK 6**

item 5 - **state of economic independence**: not dependent on others - 1, partially dependent on others - 2, fully dependent on others - 3

item 7 - **person supporting aged person**: spouse - 1, own children - 2, grand children - 3, others - 9

item 9 - **living arrangement**: living alone:as an inmate of old age home - 1, not as an inmate of old age home - 2; living with spouse only - 3, with spouse and other members - 4, without spouse but with: children - 5,other relations - 6, non-relations - 9

item 10 - **whether child/grandchild/sibling staying nearby**: yes: within the same building -1, within the village/town - 2, outside the village/town - 3; not applicable - 4

item 11 - **physical mobility**: physically immobile: confined to bed - 1, confined to home - 2; physically mobile – 3

items 13 to 17- **ailment**: code list is given on page C-10

item 23 - **own perception about current state of health**: excellent/very good - 1, good/fair - 2, poor - 3

item 24 - **own perception about relative state of health**: compared to previous year: much better - 1, somewhat better - 2, nearly the same - 3, somewhat worse - 4, worse – 5

Report No. 507: Morbidity, Health Care and the Condition of the Aged, Jan.-June,2004



| [7] particulars of medical treatment received as inpatient of a hospital during the last 365 days                   |                                  |   |   |   |   |
|---------------------------------------------------------------------------------------------------------------------|----------------------------------|---|---|---|---|
| 1. srl. no. of the hospitalisation case                                                                             | 1                                | 2 | 3 | 4 | 5 |
| 2. srl. no. of member (as in col. 1, block 4/5) hospitalised                                                        |                                  |   |   |   |   |
| 3. age (years) (as in col. 5, block 4 / col. 4, block 5)                                                            |                                  |   |   |   |   |
| 4. type of hospital (code)                                                                                          |                                  |   |   |   |   |
| 5. nature of ailment (code)                                                                                         |                                  |   |   |   |   |
| 6. type of ward (free - 1, paying general - 2, paying special - 3)                                                  |                                  |   |   |   |   |
| 7. when admitted (code)                                                                                             |                                  |   |   |   |   |
| 8. when discharged (code)                                                                                           |                                  |   |   |   |   |
| 9. duration of stay in hospital (days)                                                                              |                                  |   |   |   |   |
| 10. loss of household income, if any, due to hospitalisation (Rs)                                                   |                                  |   |   |   |   |
| <b>details of medical services received</b> (not received - 1; received: free - 2, partly free - 3, on payment - 4) |                                  |   |   |   |   |
| 11. surgery                                                                                                         |                                  |   |   |   |   |
| 12. medicine                                                                                                        |                                  |   |   |   |   |
| 13. X-ray/ECG/EEG/Scan                                                                                              |                                  |   |   |   |   |
| 14. other diagnostic tests                                                                                          |                                  |   |   |   |   |
| 15. whether treatment availed before hospitalisation (yes - 1, no - 2)                                              |                                  |   |   |   |   |
| <b>if 1 in item 15</b>                                                                                              | 16. source of treatment (code)   |   |   |   |   |
|                                                                                                                     | 17. duration of treatment (days) |   |   |   |   |
| 18. whether treatment continued after discharge from hospital (yes - 1, no - 2)                                     |                                  |   |   |   |   |
| <b>if 1 in item 18</b>                                                                                              | 19. source of treatment (code)   |   |   |   |   |
|                                                                                                                     | 20. duration of treatment (days) |   |   |   |   |

**CODES FOR BLOCK 7**

item 4 - **type of hospital:** public hospital (incl. PHC/ sub-centres/CHC) - 1, public dispensary (incl. CGHS/ESI) - 2, private hospital - 3

item 5 - **nature of ailment:** code list is given on page C-10

item 7 - **when admitted :** during last 15 days - 1, 16 days to 365 days ago - 2, more than 365 days ago - 3

item 8 - **when discharged:** not yet - 1, during last 15 days - 2, 16 days to 365 days ago - 3

items 16 & 19 - **source of treatment:** public hospital (incl. PHC/ sub-centres/CHC) - 1, public dispensary (incl. CGHS/ESI) - 2, private hospital - 3, private doctor - 4



| [8] expenses incurred for treatment of members treated as inpatient of hospital during the last 365 days and source of finance |                                                                                                                 |                |   |   |   |   |
|--------------------------------------------------------------------------------------------------------------------------------|-----------------------------------------------------------------------------------------------------------------|----------------|---|---|---|---|
| 1.                                                                                                                             | srl. no. of the hospitalisation case (as in item 1, block 7)                                                    | 1              | 2 | 3 | 4 | 5 |
| 2.                                                                                                                             | srl. no. of member hospitalised (as in item 2, block 7)                                                         |                |   |   |   |   |
| 3.                                                                                                                             | age (years) (as in item 3, block 7)                                                                             |                |   |   |   |   |
| 4.                                                                                                                             | whether any medical service provided free by employer<br>(yes: Govt. - 1, pvt. - 2; no - 3, not applicable - 4) |                |   |   |   |   |
| <b>medical expenditure for treatment during stay at hospital (Rs)</b>                                                          |                                                                                                                 |                |   |   |   |   |
| doctor's / surgeon's fee                                                                                                       | 5. hospital staff                                                                                               |                |   |   |   |   |
|                                                                                                                                | 6. other specialists                                                                                            |                |   |   |   |   |
| medicines                                                                                                                      | 7. from hospital                                                                                                |                |   |   |   |   |
|                                                                                                                                | 8. from outside                                                                                                 |                |   |   |   |   |
| 9. diagnostic tests                                                                                                            |                                                                                                                 |                |   |   |   |   |
| 10. bed charges                                                                                                                |                                                                                                                 |                |   |   |   |   |
| 11. attendant charges                                                                                                          |                                                                                                                 |                |   |   |   |   |
| 12. physiotherapy                                                                                                              |                                                                                                                 |                |   |   |   |   |
| 13. personal medical appliances                                                                                                |                                                                                                                 |                |   |   |   |   |
| others                                                                                                                         | 14. food and other materials                                                                                    |                |   |   |   |   |
|                                                                                                                                | 15. blood, oxygen cylinder, etc.                                                                                |                |   |   |   |   |
|                                                                                                                                | 16. services (ambulance, etc.)                                                                                  |                |   |   |   |   |
| 17. expenditure not elsewhere reported                                                                                         |                                                                                                                 |                |   |   |   |   |
| 18. total (items 5 to 17)                                                                                                      |                                                                                                                 |                |   |   |   |   |
| <b>other expenses incurred by the household (Rs) (not included in item 18)</b>                                                 |                                                                                                                 |                |   |   |   |   |
| 19. transport (other than ambulance)                                                                                           |                                                                                                                 |                |   |   |   |   |
| 20. lodging charges of escort(s)                                                                                               |                                                                                                                 |                |   |   |   |   |
| 21. others                                                                                                                     |                                                                                                                 |                |   |   |   |   |
| 22. total (items 19 to 21)                                                                                                     |                                                                                                                 |                |   |   |   |   |
| 23. total expenditure incurred by the household<br>(sum of items 18 & 22 for all cases of hospitalisation taken together)      |                                                                                                                 |                |   |   |   |   |
| <b>expenses in item 23 by source of finance (Rs)</b>                                                                           |                                                                                                                 |                |   |   |   |   |
| 24. household income/savings                                                                                                   |                                                                                                                 |                |   |   |   |   |
| 25. borrowings                                                                                                                 |                                                                                                                 |                |   |   |   |   |
| 26. contributions from friends and relatives                                                                                   |                                                                                                                 |                |   |   |   |   |
| 27. other sources (incl. sale of ornaments and other physical assets, draught animals, etc.)                                   |                                                                                                                 |                |   |   |   |   |
| 28. total (items 24 to 27)                                                                                                     |                                                                                                                 |                |   |   |   |   |
| 29. amount of reimbursement (Rs)                                                                                               |                                                                                                                 |                |   |   |   |   |
| <b>if positive entry in item 29, amount reimbursed by (Rs)</b>                                                                 | employer                                                                                                        | 30. Government |   |   |   |   |
|                                                                                                                                |                                                                                                                 | 31. private    |   |   |   |   |
|                                                                                                                                | 32. medical insurance companies                                                                                 |                |   |   |   |   |
|                                                                                                                                | 33. other agencies                                                                                              |                |   |   |   |   |

| [9] particulars of spells of ailment of household members during the last 15 days (including hospitalisation) |                                                                           |   |   |   |   |   |  |  |  |
|---------------------------------------------------------------------------------------------------------------|---------------------------------------------------------------------------|---|---|---|---|---|--|--|--|
| 1. srl. no. of spell of ailment                                                                               |                                                                           | 1 | 2 | 3 | 4 | 5 |  |  |  |
| 2. srl. no. of member reporting ailment (as in col. 1 of block 4/5)                                           |                                                                           |   |   |   |   |   |  |  |  |
| 3. age (years) (as in col. 5, block 4 / col. 4, block 5)                                                      |                                                                           |   |   |   |   |   |  |  |  |
| number of days within the reference period                                                                    | 4. ill                                                                    |   |   |   |   |   |  |  |  |
|                                                                                                               | 5. on restricted activity                                                 |   |   |   |   |   |  |  |  |
|                                                                                                               | 6. confined to bed                                                        |   |   |   |   |   |  |  |  |
| 7. nature of ailment (code)                                                                                   |                                                                           |   |   |   |   |   |  |  |  |
| 8. status of ailment (code)                                                                                   |                                                                           |   |   |   |   |   |  |  |  |
| 9. total duration of ailment (days)                                                                           |                                                                           |   |   |   |   |   |  |  |  |
| 10. whether treatment taken on medical advice (yes - 1, no - 2)                                               |                                                                           |   |   |   |   |   |  |  |  |
| if 1 in item 10                                                                                               | 11. whether any treatment received from govt. sources (yes - 1, no - 2)   |   |   |   |   |   |  |  |  |
|                                                                                                               | 12. if 2 in item 11, reason (code)                                        |   |   |   |   |   |  |  |  |
| if 2 in item 10                                                                                               | 13. reason for no treatment (code)                                        |   |   |   |   |   |  |  |  |
|                                                                                                               | 14. whether any other measure taken for recovery/relief (yes - 1, no - 2) |   |   |   |   |   |  |  |  |
|                                                                                                               | if 1 in item 14                                                           |   |   |   |   |   |  |  |  |
|                                                                                                               | 16. expenditure incurred (Rs)                                             |   |   |   |   |   |  |  |  |
| 17. loss of household income, if any, due to ailment (Rs)                                                     |                                                                           |   |   |   |   |   |  |  |  |

### CODES FOR BLOCK 9

item 7 - **nature of ailment:** code list is given on page C-10

item 8 - **status of ailment:** started more than 15 days ago and is continuing -1, started more than 15 days ago and has ended -2, started within 15 days and is continuing -3, started within 15 days and has ended - 4

item 12 - **reason for not availing govt. sources:** Govt. doctor/facility too far-1, not satisfied with medical treatment by Govt. doctor/facility -2, long waiting -3, required specific services not available - 4, others - 9

item 13 - **reason for no treatment:** no medical facility available in the neighbourhood - 1, facilities available but no treatment sought owing to: lack of faith - 2, long waiting - 3, financial reasons - 4, ailment not considered serious - 5, others - 9

item 15 - **whom consulted:** self/other household member/friend - 1, medicine shop - 2, others - 9

| [10] expenses incurred during the last 15 days for treatment of members (not as inpatient of hospital) and source of finance |                                  |                |  |  |  |  |
|------------------------------------------------------------------------------------------------------------------------------|----------------------------------|----------------|--|--|--|--|
| 1. srl. no. of ailing member (as in item 2, block 9)                                                                         |                                  |                |  |  |  |  |
| 2. age (years) (as in item 3, block 9)                                                                                       |                                  |                |  |  |  |  |
| 3. whether any medical service provided free by employer<br>(yes: Govt. -1, pvt. - 2; no - 3, not applicable - 4)            |                                  |                |  |  |  |  |
| details of medical services received (not received - 1; received: free - 2, partly free - 3, on payment - 4)                 |                                  |                |  |  |  |  |
| 4. surgery                                                                                                                   |                                  |                |  |  |  |  |
| 5. medicine received                                                                                                         |                                  |                |  |  |  |  |
| 6. X-ray/ECG/EEG/Scan                                                                                                        |                                  |                |  |  |  |  |
| 7. other diagnostic tests                                                                                                    |                                  |                |  |  |  |  |
| medical expenditure for treatment (Rs)                                                                                       |                                  |                |  |  |  |  |
| doctor's / surgeon's fee                                                                                                     | 8. hospital staff                |                |  |  |  |  |
|                                                                                                                              | 9. other specialists             |                |  |  |  |  |
| medicines                                                                                                                    | 10. from hospital                |                |  |  |  |  |
|                                                                                                                              | 11. from outside                 |                |  |  |  |  |
| 12. diagnostic tests                                                                                                         |                                  |                |  |  |  |  |
| 13. attendant charges                                                                                                        |                                  |                |  |  |  |  |
| 14. physiotherapy                                                                                                            |                                  |                |  |  |  |  |
| 15. personal medical appliances                                                                                              |                                  |                |  |  |  |  |
| others                                                                                                                       | 16. food and other materials     |                |  |  |  |  |
|                                                                                                                              | 17. blood, oxygen cylinder, etc. |                |  |  |  |  |
|                                                                                                                              | 18. services (ambulance, etc.)   |                |  |  |  |  |
| 19. expenditure not elsewhere reported                                                                                       |                                  |                |  |  |  |  |
| 20. total medical expenditure (items 8 to 19)                                                                                |                                  |                |  |  |  |  |
| expenditure reported in item 20 from                                                                                         | 21. Govt. sources                |                |  |  |  |  |
|                                                                                                                              | 22. other sources                |                |  |  |  |  |
| other expenses incurred by the household (Rs) (not included in item 20)                                                      |                                  |                |  |  |  |  |
| 23. transport charges (other than ambulance)                                                                                 |                                  |                |  |  |  |  |
| 24. lodging charges of ailing person and escort(s)                                                                           |                                  |                |  |  |  |  |
| 25. others                                                                                                                   |                                  |                |  |  |  |  |
| 26. total (items 23 to 25)                                                                                                   |                                  |                |  |  |  |  |
| 27. total expenditure incurred by the household<br>(sum of items 20 & 26 for all persons taken together)                     |                                  |                |  |  |  |  |
| source of finance for meeting the expenses in item 27 (Rs)                                                                   |                                  |                |  |  |  |  |
| 28. household income/savings                                                                                                 |                                  |                |  |  |  |  |
| 29. borrowings                                                                                                               |                                  |                |  |  |  |  |
| 30. contributions from friends and relatives                                                                                 |                                  |                |  |  |  |  |
| 31. other sources (incl. sale of ornaments and other physical assets, draught animals, etc.)                                 |                                  |                |  |  |  |  |
| 32. total (items 28 to 31)                                                                                                   |                                  |                |  |  |  |  |
| 33. total amount of reimbursement (Rs)                                                                                       |                                  |                |  |  |  |  |
| if positive entry in item 33, amount reimbursed by (Rs)                                                                      | employer                         | 34. Government |  |  |  |  |
|                                                                                                                              |                                  | 35. private    |  |  |  |  |
|                                                                                                                              | 36. medical insurance companies  |                |  |  |  |  |
|                                                                                                                              | 37. other agencies               |                |  |  |  |  |

**[11] particulars of immunisation of children (0 – 4 yrs.), pre-natal care and post-natal care for ever married women of age below 50 years during the last 365 days**

| srl. no. (as in block 4/5) | age (years) (as in block 4/5) | for children of age 0-4 yrs.                       |                                           | for ever married women below 50 years, during the last 365 days |                                            |                                                |                                                                                                         |                                                        |                                                                     |                                                 |
|----------------------------|-------------------------------|----------------------------------------------------|-------------------------------------------|-----------------------------------------------------------------|--------------------------------------------|------------------------------------------------|---------------------------------------------------------------------------------------------------------|--------------------------------------------------------|---------------------------------------------------------------------|-------------------------------------------------|
|                            |                               | whether any immunisation received (yes - 1 no - 2) | if 1 in col. 3, expenditure incurred (Rs) | whether pregnant any time (yes - 1, no - 2)                     | if 1 in col. 5                             |                                                |                                                                                                         |                                                        |                                                                     |                                                 |
|                            |                               |                                                    |                                           |                                                                 | whether any pre-natal care received (code) | if 1 or 2 in col. 6, expenditure incurred (Rs) | whether given birth to a child (yes: in govt. hospital-1, in private hospital - 2; at home - 3; no - 4) | if 1, 2 or 3 in col. 8, expenditure on childbirth (Rs) | if 1, 2 or 3 in col. 8, whether any post-natal care received (code) | if 1 or 2 in col. 10, expenditure incurred (Rs) |
| (1)                        | (2)                           | (3)                                                | (4)                                       | (5)                                                             | (6)                                        | (7)                                            | (8)                                                                                                     | (9)                                                    | (10)                                                                | (11)                                            |
|                            |                               |                                                    |                                           |                                                                 |                                            |                                                |                                                                                                         |                                                        |                                                                     |                                                 |
|                            |                               |                                                    |                                           |                                                                 |                                            |                                                |                                                                                                         |                                                        |                                                                     |                                                 |
|                            |                               |                                                    |                                           |                                                                 |                                            |                                                |                                                                                                         |                                                        |                                                                     |                                                 |
|                            |                               |                                                    |                                           |                                                                 |                                            |                                                |                                                                                                         |                                                        |                                                                     |                                                 |

**CODES FOR BLOCK 11**

cols. 6 & 10 - *pre-natal/post-natal care received*: yes: from Govt. sources – 1, from private sources – 2; no - 3

**CODES FOR: (i) AILMENT (items 13 to 17, block 6)**

**(ii) NATURE OF AILMENT (item 5, block 7 & item 7, block 9)**

| ailment                                               | code | ailment                                                | code |
|-------------------------------------------------------|------|--------------------------------------------------------|------|
| <b>Gastro-intestinal</b>                              |      | <i>Diabetes mellitus</i>                               | 22   |
| <i>Diarrhoea/ dysentery</i>                           | 01   | <i>Under-nutrition</i>                                 | 23   |
| <i>Gastritis/gastric or peptic ulcer</i>              | 02   | <i>Anaemia</i>                                         | 24   |
| <i>Worm infestation</i>                               | 03   | <i>Sexually transmitted diseases</i>                   | 25   |
| <i>Amoebiasis</i>                                     | 04   | <b>Febrile illnesses</b>                               |      |
| <i>Hepatitis/Jaundice</i>                             | 05   | <i>Malaria</i>                                         | 26   |
| <b>Cardiovascular Diseases</b>                        |      | <i>Eruptive</i>                                        | 27   |
| <i>Heart disease</i>                                  | 06   | <i>Mumps</i>                                           | 28   |
| <i>Hypertension</i>                                   | 07   | <i>Diphtheria</i>                                      | 29   |
|                                                       |      | <i>Whooping cough</i>                                  | 30   |
| <i>Respiratory including ear/nose/throat ailments</i> | 08   | <i>Fever of unknown origin</i>                         | 31   |
| <i>Tuberculosis</i>                                   | 09   |                                                        |      |
| <i>Bronchial asthma</i>                               | 10   | <i>Tetanus</i>                                         | 32   |
| <i>Disorders of joints and bones</i>                  | 11   | <i>Filariasis/Elephantiasis</i>                        | 33   |
| <i>Diseases of kidney/urinary system</i>              | 12   |                                                        |      |
| <i>Prostatic disorders</i>                            | 13   | <b>Disabilities</b>                                    |      |
| <i>Gynaecological disorders</i>                       | 14   | <i>Locomotor</i>                                       | 34   |
| <i>Neurological disorders</i>                         | 15   | <i>Visual including blindness (excluding cataract)</i> | 35   |
| <i>Psychiatric disorders</i>                          | 16   | <i>Speech</i>                                          | 36   |
|                                                       |      | <i>Hearing</i>                                         | 37   |
| <b>Eye ailments</b>                                   |      | <i>Diseases of Mouth/Teeth/Gum</i>                     | 38   |
| <i>Conjunctivitis</i>                                 | 17   | <i>Accidents/Injuries/Burns/</i>                       |      |
| <i>Glaucoma</i>                                       | 18   | <i>Fractures/Poisoning</i>                             | 39   |
| <i>Cataract</i>                                       | 19   | <i>Cancer and other tumours</i>                        | 40   |
|                                                       |      |                                                        |      |
| <i>Diseases of skin</i>                               | 20   | <i>Other diagnosed ailments</i>                        | 41   |
| <i>Goitre</i>                                         | 21   | <i>Other undiagnosed ailments</i>                      | 99   |

## List of NSS Reports available for sale

| Sl. No.                                                                                        | Report No.    | Title of the Report                                                                             | Price (in Rs.) |                 |
|------------------------------------------------------------------------------------------------|---------------|-------------------------------------------------------------------------------------------------|----------------|-----------------|
|                                                                                                |               |                                                                                                 | Hard Copy      | Floppy(s)/CD(s) |
| (1)                                                                                            | (2)           | (3)                                                                                             | (4)            | (5)             |
| <b>Unorganised Trade, NSS 46th Round</b>                                                       |               |                                                                                                 |                |                 |
| 1*                                                                                             | 403           | Small Trading Units in India                                                                    | 150            | 380             |
| 2                                                                                              | 403/1         | State Level results on small trading units in India: Vol.-I                                     | 250            | 710             |
| 3*                                                                                             | 403/1         | State Level results on small trading units in India: Vol.-II                                    | 250            | 710             |
| <b>Land &amp; livestock holdings and Debt &amp; Investment, NSS 48th Round</b>                 |               |                                                                                                 |                |                 |
| 4*                                                                                             | 407           | Operational land holdings in India, 1991-92: Salient features                                   | 250            | 710             |
| 5                                                                                              | 408           | Live-stock and Agricultural implements in House-hold operational holdings, 1991-92              | 150            | 380             |
| 6                                                                                              | 414           | Seasonal variation in the operation of land holdings in India, 1991-92                          | 250            | 710             |
| 7                                                                                              | 419           | Household Assets and Liabilities as on 30.6.91                                                  | 250            | 1140            |
| 8                                                                                              | 420           | Indebtedness of Rural Households as on 30.6.1991                                                | 250            | 1370            |
| 9                                                                                              | 421           | Indebtedness of Urban Households as on 30.6.1991                                                | 250            | 1370            |
| 10                                                                                             | 431(Part I)   | Household Borrowings and Repayments during 1.7.91 to 30.6.92                                    | 250            | 1140            |
| 11                                                                                             | 431(Part-II)  | -do-                                                                                            | 250            | 1140            |
| 12                                                                                             | 432 (Part-I)  | Households Assets and Indebtedness of Social Groups as on 30.6.91                               | 250            | 1140            |
| 13                                                                                             | 432 (Part-II) | -do-                                                                                            | 250            | 710             |
| 14                                                                                             | 437           | Household capital expenditure during 1.7.91 to 30.6.92.                                         | 250            | 1370            |
| <b>Housing Conditions and Migration with special emphasis on slum dwellers, NSS 49th round</b> |               |                                                                                                 |                |                 |
| 15                                                                                             | 417           | Slums in India                                                                                  | 150            | 380             |
| 16                                                                                             | 429           | Housing Conditions in India                                                                     | 150            | 380             |
| 17                                                                                             | 430           | Migration in India                                                                              | 250            | 710             |
| <b>Employment &amp; Unemployment, NSS 50th Round</b>                                           |               |                                                                                                 |                |                 |
| 18                                                                                             | 406           | Key Results on Employment & Unemployment                                                        | 150            | 610             |
| 19                                                                                             | 409           | Employment & Unemployment in India, 1993-94                                                     | 250            | 710             |
| 20                                                                                             | 411           | Employment & Unemployment situation in cities and Towns in India, 1993-94                       | 150            | 380             |
| 21                                                                                             | 412           | Economic activities and school attendance by children in India, 1993-94                         | 150            | 380             |
| 22*                                                                                            | 416           | Participation of Indian women in household work and other specified activities, 1993-94         | 150            | 380             |
| 23                                                                                             | 418           | Unemployed in India, 1993-94 : Salient Features                                                 | 150            | 380             |
| 24                                                                                             | 425           | Employment & Unemployment situation among social groups in India, 1993-94                       | 250            | 480             |
| 25                                                                                             | 438           | Employment & Unemployment situation among religious groups in India, 1993-94                    | 150            | 610             |
| <b>Consumer Expenditure, NSS 50th Round</b>                                                    |               |                                                                                                 |                |                 |
| 26                                                                                             | 401           | Key results on Household Consumer Expenditure, 1993-94                                          | 150            | 380             |
| 27                                                                                             | 402           | Level and Pattern of Consumer Expenditure                                                       | 250            | 710             |
| 28*                                                                                            | 404           | Consumption of some important commodities in India                                              | 250            | 710             |
| 29                                                                                             | 405           | Nutritional intake in India                                                                     | 250            | 710             |
| 30                                                                                             | 410/1         | Dwellings in India                                                                              | 250            | 710             |
| 31                                                                                             | 410/2         | Energy used by Indian households                                                                | 150            | 380             |
| 32                                                                                             | 413           | Sources of household income in India, 1993-94                                                   | 150            | 380             |
| 33                                                                                             | 415           | Reported adequacy of food intake in India, 1993-94                                              | 150            | 380             |
| 34                                                                                             | 422           | Differences in level of consumption among socio-economic groups                                 | 150            | 380             |
| 35                                                                                             | 423           | IRDP assistance and participation in Public Works, 1993-94                                      | 150            | 380             |
| 36                                                                                             | 426           | Use of durable goods by Indian households, 1993-94                                              | 150            | 380             |
| 37                                                                                             | 424           | Ownership of Live-Stock, cultivation of selected crops and consumption levels, 1993-94          | 150            | 610             |
| 38                                                                                             | 427           | Consumption of tobacco in India, 1993-94                                                        | 150            | 610             |
| 39                                                                                             | 428           | Wages in kind, Exchanges of Gifts and Expenditure on Ceremonies and Insurance in India, 1993-94 | 150            | 610             |

\* The hard copies are out of stock. However, soft copies are available.

Continued

## List of NSS Reports available for sale(contd.)

| Sl. No.                                                                                                                                   | Report No. | Title of the Report                                                                    | Price (in Rs.) |                 |
|-------------------------------------------------------------------------------------------------------------------------------------------|------------|----------------------------------------------------------------------------------------|----------------|-----------------|
|                                                                                                                                           |            |                                                                                        | Hard Copy      | Floppy(s)/CD(s) |
| (1)                                                                                                                                       | (2)        | (3)                                                                                    | (4)            | (5)             |
| <b>Consumer Expenditure and Unorganised Manufacture, NSS 51st Round</b>                                                                   |            |                                                                                        |                |                 |
| 40                                                                                                                                        | 433        | Unorganised Manufacturing Sector in India Its Size, Employment and Some Key Estimates. | 250            | 710             |
| 41                                                                                                                                        | 434        | Unorganised Manufacturing Enterprises in India: Salient Features                       | 250            | 710             |
| 42                                                                                                                                        | 435        | Assets and Borrowings of the Unorganised Manufacturing Enterprises in India            | 150            | 380             |
| 43                                                                                                                                        | 436        | Household Consumer Expenditure and Employment Situation in India, 1994-95              | 150            | 610             |
| <b>Consumer Expenditure, NSS 52nd Round</b>                                                                                               |            |                                                                                        |                |                 |
| 44                                                                                                                                        | 440        | Household Consumer Expenditure and Employment Situation in India, 1995-96              | 150            | 610             |
| <b>Education, NSS 52nd Round</b>                                                                                                          |            |                                                                                        |                |                 |
| 45                                                                                                                                        | 439        | Attending an Educational Institution in India: Its level, nature and cost              | 250            | 1140            |
| <b>Health, NSS 52nd Round</b>                                                                                                             |            |                                                                                        |                |                 |
| 46*                                                                                                                                       | 441        | Morbidity and Treatment of ailments                                                    | 250            | 1140            |
| 47                                                                                                                                        | 445        | Maternal and Child Health Care in India                                                | 150            | 1270            |
| <b>Aged in India, NSS 52nd Round</b>                                                                                                      |            |                                                                                        |                |                 |
| 48                                                                                                                                        | 446        | The Aged in India, A Socio-Economic Profile, 1995-96                                   | 150            | 380             |
| <b>Consumer Expenditure, NSS 53rd Round</b>                                                                                               |            |                                                                                        |                |                 |
| 49                                                                                                                                        | 442        | Household Consumer Expenditure and Employment Situation in India, 1997                 | 150            | 610             |
| <b>Unorganised Trade, NSS 53rd Round</b>                                                                                                  |            |                                                                                        |                |                 |
| 50                                                                                                                                        | 443        | Small Trading units in India and their Basic Characteristics: 1997, Vol. I             | 250            | 710             |
| 51                                                                                                                                        | 444        | Small Trading units in India and their Basic Characteristics: 1997, Vol. II            | 250            | 710             |
| <b>Consumer Expenditure, Common Property Resources, Sanitation &amp; Hygiene, Services, NSS 54th Round</b>                                |            |                                                                                        |                |                 |
| 52                                                                                                                                        | 448        | Household Consumer Expenditure and Employment Situation in India                       | 150            | 610             |
| 53                                                                                                                                        | 449        | Drinking water, sanitation and hygiene in India                                        | 250            | 1140            |
| 54                                                                                                                                        | 450        | Travel and Use of Mass Media and Financial Services by Indian Households               | 150            | 610             |
| 55                                                                                                                                        | 451        | Cultivation Practices in India                                                         | 250            | 1370            |
| 56                                                                                                                                        | 452        | Common Property Resources                                                              | 250            | 1370            |
| <b>Choice of Reference Period for Consumption Data, NSS 51<sup>st</sup>, 52<sup>nd</sup>, 53<sup>rd</sup> &amp; 54<sup>th</sup> Round</b> |            |                                                                                        |                |                 |
| 57                                                                                                                                        | 447        | Choice of Reference Period for Consumption Data                                        | 150            | 1700            |
| <b>Consumer Expenditure, NSS 55th Round (July'99 - June 2000)</b>                                                                         |            |                                                                                        |                |                 |
| 58                                                                                                                                        | 453        | Household Consumer Expenditure in India (July – December 1999) - Key Results           | 150            | 610             |
| 59                                                                                                                                        | 454        | Household Consumer Expenditure in India, 1999–2000 - Key Results                       | 150            | 610             |
| 60*                                                                                                                                       | 457        | Level and Pattern of Consumer Expenditure in India, 1999 - 2000                        | 250            | 1520            |
| 61                                                                                                                                        | 461        | Consumption of some important Commodities in India, 1999-2000                          | 250            | 1370            |
| 62                                                                                                                                        | 463        | Sources of household income in India, 1999-2000                                        | 150            | 380             |
| 63                                                                                                                                        | 464        | Energy Used by Indian Households, 1999-2000                                            | 150            | 610             |
| 64                                                                                                                                        | 466        | Reported Adequacy of Food Intake in India, 1999 - 2000                                 | 150            | 610             |
| 65                                                                                                                                        | 467        | IRDP Assistance and Participation in Public Works: 1999-2000                           | 150            | 610             |
| 66                                                                                                                                        | 471        | Nutritional Intake in India, 1999-2000                                                 | 250            | 710             |
| 67                                                                                                                                        | 472        | Differences in the level of consumption among socio economic groups, 1999-2000         | 250            | 480             |
| 68                                                                                                                                        | 473        | Literacy and Levels of Education in India, 1999 - 2000                                 | 250            | 610             |
| 69                                                                                                                                        | 474        | Sources of household consumption in India, 1999 - 2000                                 | 250            | 710             |

\* The hard copies are out of stock. However, soft copies are available.

Continued



## List of NSS Reports available for sale (contd.)

| Sl. No.                                                                                                | Report No.   | Title of the Report                                                                                         | Price (in Rs.) |                  |
|--------------------------------------------------------------------------------------------------------|--------------|-------------------------------------------------------------------------------------------------------------|----------------|------------------|
|                                                                                                        |              |                                                                                                             | Hard Copy      | Floppy(s)/ CD(s) |
| (1)                                                                                                    | (2)          | (3)                                                                                                         | (4)            | (5)              |
| <b>Employment &amp; Unemployment, NSS 55th Round (July'99 - June 2000)</b>                             |              |                                                                                                             |                |                  |
| 70                                                                                                     | 455          | Employment and Unemployment in India, 1999-2000 - Key Results                                               | 150            | 610              |
| 71                                                                                                     | 458 (Part-I) | Employment and Unemployment Situation in India, 1999 - 2000                                                 | 250            | 750              |
| 72                                                                                                     | 458(Part-II) | Employment and Unemployment Situation in India, 1999 - 2000                                                 | 250            | 1370             |
| 73                                                                                                     | 460          | Non agricultural workers in Informal Sector based on Employment and Unemployment Survey, 1999-2000          | 150            | 610              |
| 74                                                                                                     | 462          | Employment and Unemployment situation in Cities and Towns of India, 1999-2000                               | 150            | 610              |
| 75                                                                                                     | 465          | Participation of Indian Women in Household work and other specified activities, 1999-2000                   | 150            | 610              |
| 76                                                                                                     | 468          | Employment and Unemployment among religious groups in India, 1999-2000                                      | 150            | 610              |
| 77                                                                                                     | 469          | Employment and Unemployment among social groups in India, 1999-2000                                         | 250            | 2950             |
| 78                                                                                                     | 470          | Migration in India, 1999-2000                                                                               | 250            | 1140             |
| <b>Non-agricultural Enterprises in Informal Sector 1999-2000, NSS 55th Round (July'99 - June 2000)</b> |              |                                                                                                             |                |                  |
| 79*                                                                                                    | 456          | Non-agricultural Enterprises in the Informal Sector in India, 1999-2000 - Key Results                       | 150            | 610              |
| 80                                                                                                     | 459          | Informal Sector in India, 1999 - 2000 - Salient Features                                                    | 250            | 1600             |
| <b>Unorganised Manufacturing, NSS 56th Round (July 2000 - June 2001)</b>                               |              |                                                                                                             |                |                  |
| 81                                                                                                     | 477          | Unorganised Manufacturing Sector in India 2000-2001 - Key Results                                           | 250            | 710              |
| 82                                                                                                     | 478          | Unorganised Manufacturing Sector in India 2000-2001 - Characteristics of Enterprises                        | 250            | 1370             |
| 83                                                                                                     | 479          | Unorganised Manufacturing Sector in India, 2000 - 2001: Employment, Assets and Borrowings                   | 250            | 1370             |
| 84                                                                                                     | 480          | Unorganised Manufacturing Sector in India, 2000 - 2001: Input, Output and Value added                       | 250            | 1370             |
| <b>Consumer Expenditure, NSS 56th Round (July 2000 - June 2001)</b>                                    |              |                                                                                                             |                |                  |
| 85                                                                                                     | 476          | Household Consumer Expenditure and Employment - Unemployment Situation in India, 2000 - 2001                | 150            | 1040             |
| <b>Pilot Survey on Suitability of Reference Period for Measuring Household Consumption</b>             |              |                                                                                                             |                |                  |
| 86                                                                                                     | 475          | Results of a Pilot Survey on Suitability of Different Reference Periods for Measuring Household Consumption | 150            | 610              |
| <b>Unorganised Service Sector, NSS 57th Round (July 2001 - June 2002)</b>                              |              |                                                                                                             |                |                  |
| 87                                                                                                     | 482          | Unorganised Service Sector in India 2001 - 02 Salient Features                                              | 250            | 1925             |
| 88                                                                                                     | 483          | Unorganised Service Sector in India 2001 - 02 Characteristics of Enterprises                                | 250            | 1370             |
| <b>Consumer Expenditure, NSS 57th Round (July 2001 - June 2002)</b>                                    |              |                                                                                                             |                |                  |
| 89                                                                                                     | 481          | Household Consumer Expenditure and Employment - Unemployment Situation in India, 2001 - 2002                | 250            | 2680             |
| <b>Disability, NSS 58th Round (July 2002 - December 2002)</b>                                          |              |                                                                                                             |                |                  |
| 90                                                                                                     | 485          | Disabled Persons in India, July-December 2002                                                               | 250            | 7080             |
| <b>Consumer Expenditure, NSS 58th Round (July 2002 - December 2002)</b>                                |              |                                                                                                             |                |                  |
| 91                                                                                                     | 484          | Household Consumer Expenditure and Employment - Unemployment Situation in India, 2002 - 2003                | 150            | 2380             |

\* The hard copies are out of stock. However, soft copies are available.

Continued

## List of NSS Reports available for sale

| Sl. No. | Report No. | Title of the Report                                                                                    | Price (in Rs.) |                  |
|---------|------------|--------------------------------------------------------------------------------------------------------|----------------|------------------|
|         |            |                                                                                                        | Hard Copy      | Floppy(s)/ CD(s) |
| (1)     | (2)        | (3)                                                                                                    | (4)            | (5)              |
|         |            | <b>Village facilities,<br/>NSS 58<sup>th</sup> Round (July 2002 - December 2002)</b>                   |                |                  |
| 92      | 487        | Report on village facilities, July-December 2002                                                       | 150            | 980              |
|         |            | <b>Urban Slums,<br/>NSS 58<sup>th</sup> Round (July 2002 - December 2002)</b>                          |                |                  |
| 93      | 486        | Condition of Urban Slums, 2002: Salient Features                                                       | 250            | 2080             |
|         |            | <b>Housing Condition,<br/>NSS 58<sup>th</sup> Round (July 2002 - December 2002)</b>                    |                |                  |
| 94      | 488        | Housing Condition in India, 2002: Housing stock and constructions                                      | 250            | 9280             |
| 95      | 489        | Housing Condition in India, 2002: Household Amenities and Other Characteristics                        | 250            | 9220             |
|         |            | <b>Consumer Expenditure,<br/>NSS 59<sup>th</sup> Round (January - December 2003)</b>                   |                |                  |
| 96      | 490        | Household Consumer Expenditure and Employment - Unemployment Situation in India                        | 150            | 1580             |
|         |            | <b>Situation Assessment Survey of Farmers,<br/>NSS 59<sup>th</sup> Round (January - December 2003)</b> |                |                  |
| 97      | 498        | Indebtedness of Farmer Households                                                                      | 150            | 1380             |
| 98      | 499        | Access to Modern Technology for Farming, 2003                                                          | 250            | 1680             |
| 99      | 496        | Some Aspects of Farming, 2003                                                                          | 250            | 2680             |
| 100     | 495        | Consumption Expenditure of Farmer Households, 2003                                                     | 250            | 2140             |
| 101     | 497        | Income, Expenditure and Productive Assets of Farmer Households, 2003                                   | 250            | 3480             |
|         |            | <b>Land &amp; livestock holdings and Debt &amp; Investment,<br/>NSS 59<sup>th</sup> Round</b>          |                |                  |
| 102     | 493        | Livestock Ownership Across Operational Land Holding Classes in India, 2002-03                          | 150            | 1580             |
| 103     | 500        | Household Assets and Liabilities in India as on 30.06.2002                                             | 250            | 4880             |
| 104     | 501        | Household Indebtedness in India as on 30.06.2002                                                       | 250            | 6000             |
| 105     | 502        | Household Borrowings and Repayments in India during 1.7.2002 to 30.6.2003                              | 250            | 4750             |
|         |            | <b>Employment &amp; Unemployment, NSS 60<sup>th</sup> Round<br/>(January - June 2004)</b>              |                |                  |
| 106     | 506        | Employment and Unemployment Situation in India, January - June 2004                                    | 250            | 3580             |
|         |            | <b>Consumer Expenditure,<br/>NSS 60<sup>th</sup> Round (January - June 2004)</b>                       |                |                  |
| 107     | 505        | Household Consumer Expenditure in India, January - June 2004                                           | 150            | 2580             |
|         |            | <b>Health, NSS 60<sup>th</sup> Round (January - June 2004)</b>                                         |                |                  |
| 108     | 507        | Morbidity, Health Care and the Condition of the Aged                                                   | 250            | 4480             |

\* The hard copies are out of stock. However, soft copies are available.

Copies are available with the Deputy Director General, SDRD, NSSO, 164, Gopal Lal Tagore Road, Kolkata-700 108 on payment basis through Demand Draft drawn in favour of "Pay & Accounts Officer, Ministry of Statistics & P.I., Kolkata". Postal Charges will be Rs. 85/- by Speed Post and Rs. 30/- by Regd. Parcel for single copy within India.



STROBE Statement—Checklist of items that should be included in reports of *cross-sectional studies*

|                              | Item No | Recommendation                                                                                                                                                                                                                                                                                                                                                                                           |
|------------------------------|---------|----------------------------------------------------------------------------------------------------------------------------------------------------------------------------------------------------------------------------------------------------------------------------------------------------------------------------------------------------------------------------------------------------------|
| <b>Title and abstract</b>    | 1       | (a) Indicate the study's design with a commonly used term in the title or the abstract<br><b>Yes</b>                                                                                                                                                                                                                                                                                                     |
|                              |         | (b) Provide in the abstract an informative and balanced summary of what was done and what was found <b>Yes</b>                                                                                                                                                                                                                                                                                           |
| <b>Introduction</b>          |         |                                                                                                                                                                                                                                                                                                                                                                                                          |
| Background/rationale         | 2       | Explain the scientific background and rationale for the investigation being reported<br><b>Yes</b>                                                                                                                                                                                                                                                                                                       |
| Objectives                   | 3       | State specific objectives, including any prespecified hypotheses <b>Yes</b>                                                                                                                                                                                                                                                                                                                              |
| <b>Methods</b>               |         |                                                                                                                                                                                                                                                                                                                                                                                                          |
| Study design                 | 4       | Present key elements of study design early in the paper <b>Yes</b>                                                                                                                                                                                                                                                                                                                                       |
| Setting                      | 5       | Describe the setting, locations, and relevant dates, including periods of recruitment, exposure, follow-up, and data collection <b>Yes</b>                                                                                                                                                                                                                                                               |
| Participants                 | 6       | (a) Give the eligibility criteria, and the sources and methods of selection of participants <b>Yes</b>                                                                                                                                                                                                                                                                                                   |
| Variables                    | 7       | Clearly define all outcomes, exposures, predictors, potential confounders, and effect modifiers. Give diagnostic criteria, if applicable <b>Yes</b>                                                                                                                                                                                                                                                      |
| Data sources/<br>measurement | 8*      | For each variable of interest, give sources of data and details of methods of assessment (measurement). Describe comparability of assessment methods if there is more than one group <b>Yes</b>                                                                                                                                                                                                          |
| Bias                         | 9       | Describe any efforts to address potential sources of bias <b>Yes</b>                                                                                                                                                                                                                                                                                                                                     |
| Study size                   | 10      | Explain how the study size was arrived at <b>Yes</b>                                                                                                                                                                                                                                                                                                                                                     |
| Quantitative variables       | 11      | Explain how quantitative variables were handled in the analyses. If applicable, describe which groupings were chosen and why <b>Yes</b>                                                                                                                                                                                                                                                                  |
| Statistical methods          | 12      | (a) Describe all statistical methods, including those used to control for confounding<br><b>Yes</b><br>(b) Describe any methods used to examine subgroups and interactions<br>(c) Explain how missing data were addressed <b>Method identical to baseline NSSO survey</b><br>(d) If applicable, describe analytical methods taking account of sampling strategy<br>(e) Describe any sensitivity analyses |
| <b>Results</b>               |         |                                                                                                                                                                                                                                                                                                                                                                                                          |
| Participants                 | 13*     | (a) Report numbers of individuals at each stage of study—eg numbers potentially eligible, examined for eligibility, confirmed eligible, included in the study, completing follow-up, and analysed <b>Yes</b><br>(b) Give reasons for non-participation at each stage<br>(c) Consider use of a flow diagram                                                                                               |
| Descriptive data             | 14*     | (a) Give characteristics of study participants (eg demographic, clinical, social) and information on exposures and potential confounders <b>Yes</b><br>(b) Indicate number of participants with missing data for each variable of interest                                                                                                                                                               |
| Outcome data                 | 15*     | Report numbers of outcome events or summary measures <b>Yes</b>                                                                                                                                                                                                                                                                                                                                          |
| Main results                 | 16      | (a) Give unadjusted estimates and, if applicable, confounder-adjusted estimates and their precision (eg, 95% confidence interval). Make clear which confounders were adjusted for and why they were included <b>Yes</b><br>(b) Report category boundaries when continuous variables were categorized                                                                                                     |

(c) If relevant, consider translating estimates of relative risk into absolute risk for a meaningful time period

|                          |    |                                                                                                                                                                                       |
|--------------------------|----|---------------------------------------------------------------------------------------------------------------------------------------------------------------------------------------|
| Other analyses           | 17 | Report other analyses done—eg analyses of subgroups and interactions, and sensitivity analyses <b>Yes</b>                                                                             |
| <b>Discussion</b>        |    |                                                                                                                                                                                       |
| Key results              | 18 | Summarise key results with reference to study objectives <b>Yes</b>                                                                                                                   |
| Limitations              | 19 | Discuss limitations of the study, taking into account sources of potential bias or imprecision. Discuss both direction and magnitude of any potential bias <b>Yes</b>                 |
| Interpretation           | 20 | Give a cautious overall interpretation of results considering objectives, limitations, multiplicity of analyses, results from similar studies, and other relevant evidence <b>Yes</b> |
| Generalisability         | 21 | Discuss the generalisability (external validity) of the study results <b>Yes</b>                                                                                                      |
| <b>Other information</b> |    |                                                                                                                                                                                       |
| Funding                  | 22 | Give the source of funding and the role of the funders for the present study and, if applicable, for the original study on which the present article is based <b>Yes</b>              |

\*Give information separately for exposed and unexposed groups.

**Note:** An Explanation and Elaboration article discusses each checklist item and gives methodological background and published examples of transparent reporting. The STROBE checklist is best used in conjunction with this article (freely available on the Web sites of PLoS Medicine at <http://www.plosmedicine.org/>, Annals of Internal Medicine at <http://www.annals.org/>, and Epidemiology at <http://www.epidem.com/>). Information on the STROBE Initiative is available at [www.strobe-statement.org](http://www.strobe-statement.org).

# BMJ Open

## Trends in addressing inequalities in access to hospital care in Andhra Pradesh and Maharashtra states of India

|                                 |                                                                                                                                                                                                                                                                                                                                                                                                                                                                                                                                                                                    |
|---------------------------------|------------------------------------------------------------------------------------------------------------------------------------------------------------------------------------------------------------------------------------------------------------------------------------------------------------------------------------------------------------------------------------------------------------------------------------------------------------------------------------------------------------------------------------------------------------------------------------|
| Journal:                        | <i>BMJ Open</i>                                                                                                                                                                                                                                                                                                                                                                                                                                                                                                                                                                    |
| Manuscript ID:                  | bmjopen-2013-004471.R1                                                                                                                                                                                                                                                                                                                                                                                                                                                                                                                                                             |
| Article Type:                   | Research                                                                                                                                                                                                                                                                                                                                                                                                                                                                                                                                                                           |
| Date Submitted by the Author:   | 18-Mar-2014                                                                                                                                                                                                                                                                                                                                                                                                                                                                                                                                                                        |
| Complete List of Authors:       | Rao, Mala; University of East London, Institute for Health and Human Development<br>Katyal, Anuradha; ACCESSHealth International,<br>Singh, Prabal; ACCESSHealth International,<br>Samarth, Amit; Sughavazhvu Healthcare,<br>Bergkvist, Sofi; ACCESSHealth International,<br>Kancharla, Manjusha; Indian School of Business,<br>Wagstaff, Adam; World Bank, Development Research Group<br>Netuveli, Gopalakrishnan; University of East London, Institute for Health and Human Development<br>Renton, Adrian; University of East London, Institute for Health and Human Development |
| <b>Primary Subject Heading</b>: | Public health                                                                                                                                                                                                                                                                                                                                                                                                                                                                                                                                                                      |
| Secondary Subject Heading:      | Health services research                                                                                                                                                                                                                                                                                                                                                                                                                                                                                                                                                           |
| Keywords:                       | Health economics < HEALTH SERVICES ADMINISTRATION & MANAGEMENT, Health policy < HEALTH SERVICES ADMINISTRATION & MANAGEMENT, PUBLIC HEALTH                                                                                                                                                                                                                                                                                                                                                                                                                                         |
|                                 |                                                                                                                                                                                                                                                                                                                                                                                                                                                                                                                                                                                    |

SCHOLARONE™  
Manuscripts

**TITLE PAGE****TITLE:**

**Trends in addressing inequalities in access to hospital care in Andhra Pradesh and Maharashtra states of India**

**STUDY DESIGN:** A cross-sectional difference in difference study with parallel control.

**AUTHOR NAMES, ADDRESSES AND POSITIONS:**

1.Mala Rao. Professor of International Health, Institute for Health and Human Development, University of East London, UK & Honorary Adviser, Administrative Staff College of India, Hyderabad

2. Anuradha Katyal, Consultant, ACCESS Health International, Hyderabad, India

3.Prabal V Singh, Director Research, ACCESS Health International, Hyderabad, India

4.Amit Samarth, Head, Strategy and Planning, SughaVazhvu Healthcare, Thanjavur, India

5.Sofi Bergkvist, Managing Director, ACCESS Health International, Hyderabad, India

6.Manjusha Kancharla, Research Associate, Indian School of Business, Hyderabad India

7.Adam Wagstaff, Research Manager, Human Development & Public Services team, Development Research Group (DECRG), The World Bank, Washington DC, USA

8.Gopalakrishnan Netuveli. Professor of Public Health, Institute for Health and Human Development, University of East London & ESRC International Centre for Life Course Studies in Society and Health, University College London, UK

9.Adrian Renton. Director, Institute for Health and Human Development, University of East London, UK

**All authors had full access to all the data (including statistical reports and tables) and can take responsibility for the integrity of the data and the accuracy of the data analysis**

**Corresponding author and guarantor of the data and information:** Mala Rao (best email address: m.rao@uel.ac.uk).

**M Rao affirms that the manuscript is an honest, accurate and transparent account of the study being reported and no important aspects of the study have been omitted.**

**ABSTRACT. WORD COUNT: 298****OBJECTIVES**

To compare the effects of the Rajiv Aarogyasri Health Insurance Scheme of Andhra Pradesh (AP) with health financing innovations including the RSBY in Maharashtra (MH) over time on access to and out of pocket expenditure (OOPE) on hospital inpatient care.

**STUDY DESIGN**

A cross-sectional difference in difference (DID) study with parallel control.

**SETTING**

National Sample Survey Organisation of India (NSSO) urban and rural 'first stratum units', 863 in AP and 1008 in MH.

**METHODS**

We used two cross-sectional surveys: as a baseline, the data from the NSSO 2004 survey collected before the Aarogyasri and RSBY schemes were launched and as post-intervention, a survey using the same NSSO methodology conducted in 2012.

**PARTICIPANTS**

8623 households in AP and 10073 in MH

**MAIN OUTCOME MEASURES**

Average OOPE, large OOPE and large borrowing per household per year for inpatient care, hospitalisation rate per 1000 population per year.

**RESULTS**

Average expenditure, large expenditures and large borrowings on inpatient care had increased in both MH and AP, but the increase was smaller in AP across these 3 outcome measures. DIDs for average expenditure and large borrowings were significant and in favour of AP for the rural and the poorest households. Hospitalisation rates also increased in both states but more so in AP, although the DID was not significant and the sub group analysis presented a mixed picture.

**CONCLUSIONS**

Health innovations in AP had a greater beneficial effect on inpatient care-related expenditures than innovations in MH. The Aarogyasri scheme is likely to have contributed to these impacts in AP at least in part. However, out of pocket expenditure increased in both states over time. Schemes such as the Aarogyasri and RSBY may result in some positive outcomes but, additional interventions may be required, to improve access to care for the most vulnerable sections of the population.

**ARTICLE SUMMARY****STRENGTHS AND LIMITATIONS OF THE STUDY**

- This study uses a quasi-experimental design to compare changes between the Indian states of Andhra Pradesh and Maharashtra, in hospital inpatient care related expenditures and behaviours before and after the rollout of the Aarogyasri and RSBY schemes
- The study based on a survey of 18696 households has shown that health innovations in Andhra Pradesh had a greater beneficial effect on hospital inpatient care-related expenditures and access than innovations in Maharashtra. The Aarogyasri scheme is likely to have contributed to these impacts in Andhra Pradesh.
- The study also highlights the implications of the findings for policy and practice and additional interventions necessary to address gaps in the availability of and access to care.
- The study is only able to compare the effects of health innovations over time across the 2 states but does not allow the drawing of inferences on the impacts of individual initiatives.
- The study uses the difference in difference methodology and its findings may have been affected by unobservable differential changes between the 2 states.

## INTRODUCTION

In 2005, member states of the World Health Organization (WHO) committed to develop their health financing systems to deliver universal coverage (UC); that is that all people have access to health services and do not suffer financial hardship paying for them<sup>1</sup>. WHO's 2010 World Health Report<sup>2</sup> recommended *inter alia* that countries reduce reliance on direct payments, and improve equity of access, including through the introduction of prepayment schemes. However, one recent systematic review of the impact of national health insurance schemes in low and middle income countries<sup>3</sup> found only weak evidence of increased use of healthcare and reduced out-of-pocket expenses, with the poorer benefitting less, whilst others<sup>4,5</sup> concluded that health insurance improved health care access and use, as well as financial protection in most cases but had no conclusive impact on health status. Both highlighted the need for more rigorous assessments of such schemes.

India has one of the highest levels of out-of-pocket health expenditure (more than 80% of private health expenditure)<sup>6</sup>. The aim of our study was to explore how recently introduced health financing initiatives have affected access to and out-of-pocket expenditure (OOPE) on inpatient hospital care in the Indian states of Andhra Pradesh (AP) and Maharashtra (MH).

## BACKGROUND

In its *Eleventh Five Year Plan (2007-12)*<sup>7</sup>, Government of India sought to increase Public Expenditure on Health and to strengthen investment in rural health infrastructure through the National Rural Health Mission. Its *Twelfth Five Year Plan (2012-17)*<sup>8</sup>, reflected the recommendation of the Planning Commission's High Level Expert Group for general taxation to be the principal source of health care financing. It proposed the development of government-funded health insurance schemes, building on the evidence from experimental schemes being introduced across many States. In India, health is primarily a state rather than national responsibility<sup>6</sup>. Whilst it is recognised that political will and good governance are essential, both the political mobilization of funds for health schemes and the effectiveness and efficiency of funded schemes will be enhanced by robust evidence which documents as to whether schemes achieve objectives, what works well and the main challenges they face.

In India, evaluation is not routine, even of large costly public health care programmes. Nevertheless, some assessments have been carried out, for example of the Yeshasvini Co-operative Farmers Health Care Scheme of Karnataka, the longest running state-supported health insurance scheme for the informal sector in India<sup>9</sup>, with promising results in terms of increased utilization of and reduced borrowing for health care services<sup>10</sup>. However, these early models covered small populations and offered limited benefits, so that the policy implications of conclusions drawn from even the best evaluations were unclear.

This scenario has changed during the past 5 years, with the launch of 2 schemes, the Rajiv Aarogyasri<sup>11</sup> Community Health Insurance Scheme (Aarogyasri) of Andhra Pradesh (AP) and Rashtriya Swasthya Bima Yojana (RSBY) currently offered in 30 states and union territories of India<sup>12</sup> including AP's neighbouring state of Maharashtra (MH). Their scale in terms of population coverage and range of treatments offered, significantly enhances their potential to inform India's road map towards universal health coverage. Both schemes belong to the new generation of publicly funded government-sponsored health insurance schemes, principally aimed at providing financial protection to the poor against catastrophic health shocks, which, for these schemes, the Government has defined as inpatient hospital care<sup>9</sup>. Both schemes have been subject to some assessment in their early phases, but a recent editorial<sup>13</sup> highlighted the necessity of further and repeated evaluations to enhance the credibility and accountability of existing schemes and to identify those which deserve scale-up. The Aarogyasri and RSBY schemes and the other recent health sector innovations in AP and

1  
2  
3 Maharashtra which form the major backdrop and complex health care architecture against which  
4 these have been launched, and which may have contributed to the changes in outcomes we have  
5 explored in our study, are described below.  
6

#### 7 *The Rajiv Aarogyasri Health Insurance Scheme of AP*

8 In 2007 AP launched a pioneering new state-wide fully state-funded health insurance scheme, the  
9 Rajiv Aarogyasri Community Health Insurance Scheme (Aarogyasri)<sup>11</sup> to provide treatment for  
10 serious and life-threatening illnesses. The specific objectives include: to improve access of poor  
11 families to quality medical care (meaning low-frequency, high cost specialist care) and treatment of  
12 identified diseases requiring hospitalisation through an identified network of health care providers,  
13 to provide financial cover for catastrophic illnesses which have the potential to wipe out life time  
14 savings of poor families and to provide 'universal coverage to the urban and the rural poor in the  
15 state'<sup>14</sup> albeit for the conditions covered in the benefits package. All families with a 'below poverty  
16 line' (BPL) ration card, i.e. those on an annual income below USD 1384 (INR 75,000) in urban areas  
17 and USD 1107 (INR 60,000) in rural areas, and including individuals with pre-existing medical  
18 conditions are *automatically* enrolled and the scheme was estimated to cover approximately 20.4  
19 million poor and lower middle class families, comprising about 85 percent of the state's population  
20 in 2009<sup>9</sup>. Enrollees make no contribution, the annual benefit is a maximum of USD 4,500 (INR  
21 200,000) per family per year and there is no limit on the size of the family<sup>14</sup>. A total of 942 medical  
22 and surgical procedures across 31 clinical specialties<sup>14</sup> are provided and the benefits include all  
23 inpatient costs - associated investigations, food, transport and medicines for 10 days following  
24 discharge. One year follow-up packages including consultation, medicines, and diagnostics are also  
25 available for 125 procedures requiring longer periods of follow up<sup>9</sup>. Aarogyasri has unique features  
26 including *Aarogyamithras* (health system navigators), outreach *health camps* delivered by  
27 participating hospitals to educate, screen and case-find and a state-of-the-art information  
28 technology-based management system. At the time of this study, 353 public and private sector  
29 hospitals were 'empanelled' to provide services to Aarogyasri beneficiaries.  
30  
31

32  
33 In 2009, a descriptive study of *Aarogyasri*, based on an analysis of claims data and a survey of  
34 beneficiaries<sup>15</sup>, concluded that while the scheme was beginning to reach its intended beneficiaries  
35 uptake was lower among scheduled castes and tribes. This was confirmed by Fan and colleagues<sup>16</sup>,  
36 who used variations in programme roll-out over time and districts to evaluate the scheme using  
37 National Sample Survey data collected before and after its launch. They reported reduced out-of-  
38 pocket expenditure in this initial phase but no major impact on catastrophic healthcare expenditure.  
39 Inspired by Aarogyasri and mindful of the political benefits of introducing popular health reforms,  
40 other states have launched health financing innovations similar to this model.  
41

#### 42 *RSBY in Maharashtra*

43  
44 RSBY was launched across a number of states by the Ministry of Labour, Government of India (GOI)  
45 in 2008<sup>17</sup> and provides access to free inpatient hospital care up to USD 550 (INR 30,000) per family  
46 per year<sup>18</sup>. Households which meet the criteria based on the much more limiting definition of  
47 poverty and numbers of poor families provided for each State by the GOI Planning Commission are  
48 eligible to enrol, and pay a contribution of USD 0.55 (INR 30) at registration and at each annual  
49 renewal<sup>9</sup>. Up to 5 family members, including those with pre-existing conditions can be covered, and  
50 personal information including biometric data are collected prior to the issue of a smart card with  
51 encoded details of the family. 700 procedures covering 18 broad categories of interventions which  
52 would generally be included under the umbrella of 'secondary' care, are provided and the benefit  
53 packages include the intervention, public transport costs limited to 1.8 USD (INR 100) per visit and  
54 18.2 USD (INR 1000) per year and post-hospitalization drugs for 5 days. Networked hospitals are  
55 required to provide free outpatient consultations (which have only recently been introduced.  
56 Personal communication, Kurian OC) but other costs such as ambulatory diagnostics and medicines  
57  
58  
59  
60



1  
2  
3 have to be borne by the beneficiaries, except if investigations lead to inpatient admissions within a  
4 day<sup>9</sup>. A pilot of the RSBY scheme was launched in 1 district of AP, but only after the start of our  
5 household survey.  
6

7  
8 In Maharashtra, enrolment began in Aug 2009, and by mid 2013, approximately 2 million of the  
9 eligible 4 million families were enrolled in the scheme<sup>12</sup> which is being implemented in 31 of 35  
10 districts in the state. Enrolment had extended to 26 districts prior to June 2012, when our household  
11 survey began. Notably, only 15 out of 1215 hospitals contracted for RSBY funded services are from  
12 the public sector<sup>12</sup>. Early assessments of the scheme's impact nationally, suggest that although the  
13 rate of hospitalisations has increased, awareness of the scheme was poor and remains a barrier to  
14 uptake. Notable variations in enrolment and scheme awareness were also observed by a descriptive  
15 study of RSBY conducted in the Amravati district of Maharashtra which has a large tribal  
16 population<sup>19</sup>. In Maharashtra<sup>17</sup>, utilisation rates have been reported to be lower than in other states  
17 and the male:female enrolment ratio is 6.5:3.5.  
18

#### 19 *Other major health sector initiatives in AP and Maharashtra*

20 Both states have a complex health care landscape with numerous programmes in place. There are  
21 several initiatives launched during the past decade, some of which are common to both states and  
22 driven by national strategies, and others owe their existence to state-level enterprise, innovation  
23 and political support. The most notable programmes with the potential to impact on in patient care  
24 are described below.  
25

26  
27 The National Rural Health Mission (NRHM) was launched in 2005 nationwide, with a key aim of  
28 reducing maternal and infant mortality<sup>20</sup>. Government reports suggest that its notable achievements  
29 include an increase in institutional deliveries; in AP from 1.25 million in 2005-06 to 1.46 million by  
30 2011-12<sup>21</sup> and in MH from 1.1 million to 1.63 million<sup>22</sup>, achieving an institutional delivery rate of  
31 approximately 92 percent in both states. Also common to both states is the '104 health information  
32 help line' launched in AP in 2008 and MH in 2011<sup>23</sup>, to provide medical advice and information based  
33 on validated algorithms and disease summaries, direct callers to appropriate health facilities or to  
34 receive a complaint against a public sector health facility. In AP the help line and call centre were  
35 subsumed within the Aarogyasri infrastructure by 2011.  
36

37  
38 In MH, the RSBY was preceded by the Jeevandayee scheme launched in 1997 with the objective of  
39 reducing catastrophic OOPE on inpatient care in the BPL population<sup>24</sup>. Potential beneficiaries were  
40 required to apply for funding after a diagnosis was confirmed and the scheme covered serious illness  
41 such as cardiac and renal disease and cancer. However, the scheme uptake has been low, and while  
42 it has continued to run in parallel to the RSBY, only 66,853 procedures (4456 procedures per year in  
43 a state with 112.37 million people) have been approved during the scheme's lifetime<sup>25</sup>. Since 2006,  
44 MH has also had a scheme in place which mandated 20% of the beds in private hospitals to be made  
45 available for free or at subsidized rates to poor patients (personal communication, Kurian OC). It has  
46 been estimated that around 10,000 private beds are available for the poor across MH, equivalent to  
47 approximately 20% of the total bed capacity of the public sector. Although the implementation of  
48 the scheme is reported to be erratic (Kurian OC), it may have had some positive impact on access to  
49 hospital inpatient care for serious illness.  
50

51  
52 Launched in 1995-96, the Navasanjeevani Yojana scheme is exclusive to the 15 tribal districts of MH  
53 and was to improve maternal and infant mortality in these vulnerable populations<sup>26</sup>. It has focused  
54 on strengthening primary health and nutrition services and access to safe drinking water.

55  
56 A service available in AP but not in MH is the '108' scheme, launched in 2005 to provide a state-of-  
57 the-art medical emergency response service<sup>27</sup>. At the time of our study, 802 ambulances catered to  
58 approximately 3,500 emergencies per day<sup>28</sup>.  
59  
60

## OBJECTIVES OF THE STUDY

Our objective was to compare the effects of health innovations over time on access to and OOPE on inpatient care in AP and MH and to assess whether the AP initiatives had larger or smaller beneficial effects than those found in MH. These differential effects are likely to be substantially due to the Aarogyasri scheme in AP and the RSBY in MH. In this paper, we report findings from a study which compared these trends. The findings do not allow us to draw inferences on the impacts of individual initiatives, but nevertheless contribute new knowledge on the impact and role of the innovations, provide lessons for other programmes, and strengthen the evidence base for policy on UC in India.

## METHODS

### Overview

None of the aforementioned initiatives – including the Aarogyasri and RSBY schemes in which we are especially interested – was piloted in a systematic way, let alone via a carefully designed randomized control trial. Following MRC Guidance<sup>29,30</sup> and best practice we therefore opted for a quasi experimental design in which we seek to minimise selection bias, to control for confounding variables and to reduce the effects of chance. Specifically, we compare changes in hospital inpatient care related expenditures and behaviours (HREB) in AP and MH before and after the rollout of the Aarogyasri scheme in AP and the RSBY scheme in MH. The difference in changes between AP and MH is not an estimate of a specific initiative. Rather it tells us whether, on balance, the AP initiatives have had larger (or smaller) beneficial effects than the MH initiatives, and if so how much more (or less) beneficial they have been. Since the NRHM was common to both states and the MH-specific initiatives were quite small in scale or unlikely to affect HREBs, any difference in change between the two states is quite likely to be mainly due to differential effects of the Aarogyasri and RSBY programmes.

AP and MH have a broadly similar development profile as shown by the data below. AP's other socio-economically similar neighbouring states of Karnataka and Tamil Nadu had already introduced Aarogyasri-like schemes, and Odisha and Chattisgarh the only other neighbours, had comparatively higher levels of socio-economic deprivation. HREBs were measured in both AP and MH by two waves of household survey before (2004) and after (2012) the introduction of Aarogyasri and RSBY. The study protocol and questionnaire for the 2012 survey were reviewed and agreed by the Research Ethics Committee of the Administrative Staff College of India, Hyderabad.

| Maharashtra | Indicator                                                   | Andhra Pradesh |
|-------------|-------------------------------------------------------------|----------------|
| 112.37      | Population (2011 census, in millions)                       | 84.66          |
| 10.20       | % Schedule Caste ( 2001 Census)*                            | 16.60          |
| 8.90        | % Schedule tribe ( 2001 census)*                            | 6.20           |
| 101,314     | Per capita income 2011-12 (in INR)**                        | 71,540         |
| 35          | Number of districts                                         | 23             |
| 5,314       | Households covered in NSSO 60 <sup>th</sup> round (2004-05) | 5,059          |
| 10,073      | Households covered in the study 2012                        | 8,623          |

\*Note that 2011 census data for social groups are not yet published

\*\*Source: Presentation on Annual Plan 2012-13 and Five Year Plan 2012-17<sup>31</sup>

### Survey design

*Baseline Survey : 2004*

We used the original data from the National Sample Survey Organization (NSSO) 60<sup>th</sup> decennial round household survey undertaken in 2004<sup>32</sup> to estimate baseline HREB estimates for AP and MH (Table 1). This was the most recent round measuring morbidity profiles, use of health care services including hospitalised and non-hospitalised treatments and expenditures incurred. The household survey used a multi-stage stratified sampling methodology to identify a representative random population sample and an interviewer completed questionnaire to obtain measures of HREB along with socio-demographic, household expenditure and other information. (see Online Appendix for full technical details of sampling method and full questionnaire).

*Follow up survey: 2012*

We used the same household survey design and methods to collect post-intervention data in AP and MH as those used by NSSO. Briefly, the household survey used a multi-stage stratified sampling methodology with the 'First Stage Units' (FSUs) identical to those used by NSSO in their 66<sup>th</sup> round (2008-09)<sup>33</sup>, the latest round for which FSUs had been mapped. However, the FSUs were not the same as those in NSSO 2004, our baseline survey, rapid urbanisation having changed substantially, the urban-rural landscape of both states and thus the geographical basis for sampling units.

**Table 1: Urban and rural populations and households surveyed in 2004 and 2012 in Andhra Pradesh and Maharashtra**

|                                   | Andhra Pradesh             |                    | Maharashtra                |                    |
|-----------------------------------|----------------------------|--------------------|----------------------------|--------------------|
|                                   | NSSO 60th round<br>2004-05 | Our survey<br>2012 | NSSO 60th round<br>2004-05 | Our survey<br>2012 |
| Population                        | 76,210,007*                | 84,665,533**       | 96,878,627*                | 112,372,972**      |
| Urban population                  | 20,808,940*                | 28,353,745**       | 41,100,980*                | 50,827,531**       |
| Rural population                  | 55,401,067*                | 56,311,788 **      | 55,777,647*                | 61,545,441**       |
| Total households (urban)          | 4,397,138*                 | 6,778,225**        | 8,403,224*                 | 10,813,928**       |
| Total households (rural)          | 12,607,167*                | 14,246,309**       | 11,173,512*                | 13,016,652**       |
| Total households                  | 17,004,305*                | 21,024,534**       | 19,576,736*                | 23,830,580**       |
| FSUs (urban)                      | 183                        | 372                | 267                        | 504                |
| FSU (rural)                       | 325                        | 491                | 265                        | 504                |
| Total households surveyed (urban) | 1824                       | 3715               | 2664                       | 5038               |
| Total households covered (rural)  | 3235                       | 4908               | 2650                       | 5035               |

\*2001 census \*\* 2011 census

FSU - First Stratum Unit

The NSSO 66<sup>th</sup> round had 492 rural FSUs in AP, but 1 FSU was found to be uninhabited.

1  
2  
3 The interviewer completed household survey questionnaire was pre-tested and then piloted in both  
4 states prior to the survey. All respondents provided written informed consent for participation.  
5 Questions addressed the following: household composition and socio-demographic characteristics  
6 of members, household expenditure, and health expenditure (outpatient and inpatient) and means  
7 of its financing, healthcare seeking behaviour, factors affecting access to healthcare and awareness  
8 and perceptions of the quality of the *Aarogyasri* scheme (AP only). The survey questions in 2012  
9 were identical to those from the NSSO 2004<sup>34</sup>. Additional questions specific to the Aarogyasri and  
10 other relevant schemes were also added.  
11

12 A survey of 18696 households across 2 states and 1871 locations within the states is a challenging  
13 undertaking. The survey design had several features intended to assure the quality of data collected.  
14 Few academic institutions have internal capacity to carry out such large surveys, and consequently,  
15 the Social and Research Institute of IMRB International, a leading market research agency was  
16 selected to carry out the survey. The Institute has field survey teams based in every Indian state,  
17 conversant in local languages and dialects and trained to carry out surveys in the socio-economic  
18 development sector. Its clients include Government of India (for whom the national Family Health  
19 Survey data are collected), World Bank and other UN organisations. A group of NSSO consultants in  
20 AP and the Indian Socioeconomic Research Unit, Pune were recruited to support the training of the  
21 field survey teams and data verification.  
22

23  
24 We planned three levels of verification of the study data; the first to be undertaken by the survey  
25 agency, the second to be carried out by the study team and the third, by the agencies mentioned  
26 above. Survey teams for each district were accountable to a field supervisor who was responsible for  
27 checking both the household listing and data entry on a daily basis. The study team also  
28 accompanied the field staff to survey sites on a regular basis. Data collected from 250 households in  
29 each state (approximately 2.5% of the surveyed households) and 186 of the FSU listings  
30 (approximately 10%) were independently verified by the agencies in both the villages and urban  
31 blocks in order to ensure that the sampling method and administration of the questionnaire survey  
32 were being correctly applied. The data entry was carried out by the Institute using a double entry  
33 method and any questionnaires reported incorrect were sent back to the field for re-survey. The  
34 research team carried out a final validation and review of the data.  
35

### 36 *Outcome measures*

37  
38 *Average inpatient (IP) expenditure per household per year.* Average out-of-pocket expenditure for  
39 inpatient care during 1 year prior to the survey was estimated from questionnaire responses for AP  
40 and MH from both baseline and follow-up data. Reimbursements for inpatient expenditure were  
41 deducted from the total where households had received them.  
42

43  
44 *Large out-of-pocket inpatient expenditure.* Because of the limited data on household consumption in  
45 the 2004 NSSO health survey we did not estimate 'catastrophic health expenditure'. Instead, we  
46 constructed a measure of 'large' out-of-pocket expenditure. The Aarogyasri Health Care Trust data  
47 on expenditure incurred by the Government of AP per case in 2012 were examined<sup>14</sup> and the mean  
48 was estimated as USD 419 (INR 23,000). A household was deemed to have incurred 'large'  
49 expenditure if OOPE for inpatient care was equal to or greater than this threshold.  
50

51  
52 *Large borrowing.* We estimated the total amount borrowed by a household to meet the expenditure  
53 of all the inpatient episodes of that family during the previous year. A household was considered to  
54 have incurred 'large borrowing' if the borrowing was equal to or exceeded the BPL threshold set by  
55 Government of AP: INR 70000 for urban families and INR 65000 for rural households. These prices  
56 have been deflated to 2004 levels.  
57  
58  
59  
60

*Hospitalisation rate.* This was estimated as the number of individuals hospitalised during the previous year, per 1000 population.

Variations in outcomes were examined between male and female-headed households, and rural and urban populations, as well as across social groups and economic groups represented by asset quintiles.

Because of the limited data on household consumption in the 2004 NSSO health survey which made the estimation of wealth difficult, we have opted instead to measure household living standards using an asset or wealth index based on information on ownership of household durables, dwelling type, etc., using principal component analysis to estimate weights<sup>35, 36, 37</sup> for each indicator. The indicators used were limited to those collected in the 2004 NSSO: type of structure of the dwelling unit, type of toilet, type of fuel used for cooking and source of drinking. Data from the 2004 and 2012 surveys were pooled so that the index captures changes in living standards between the two years; there are therefore more households in the top quintile in 2012 than in 2004. The statistical software Stata 11 was used to generate the index.

*Deflation of follow-up expenditure estimates.*

The 2012 expenditure data including the threshold for large expenditures were deflated using the consumer price index of the Government of India<sup>38</sup> to reflect 2004 prices.

*Analysis*

Our repeat cross-sectional surveys do not allow estimation of within-individual household changes in outcomes over time. Our analysis therefore focused on estimating outcomes averaged across states, and in comparing changes in these over time between AP and MH. If we assume that outcome determinants other than Aarogyasri and RSBY remained stable in the two states over time or followed a parallel trend, then a difference-in-difference (DID) analysis will uncover the net effect of Aarogyasri over and above RSBY.

The difference in differences of outcome ( $Y_{DD}$ ) is

$$(Y_{2012}^{AP} - Y_{2004}^{AP}) - (Y_{2012}^{MH} - Y_{2004}^{MH})$$

where the subscripts and superscripts for Y refer to the respective states and the years when the surveys were done. Confidence intervals were calculated from the standard error  $Y_{DD}$  of and the p-value for the null-hypothesis ( $Y_{DD} = 0$ ) was tested using the Wald test as  $t = \frac{Y_{DD}}{SE_{Y_{DD}}}$  with one degree of freedom.  $Y_{DD}$  was estimated using ordinary least square regression:

$$y_{it} = \beta_0 + \beta_1 state_i + \beta_2 survey_t + \beta_3 (state * survey)_{it} + \sum_{k=1}^m \beta_{3+k} covariate_k + \varepsilon$$

The basic DID results are obtained using the above regression with covariates excluded. The adjusted DID results are obtained using the above regression with m=9 covariates, namely the gender of head of household, a dummy variable capturing whether the household lives in a rural or urban location, three dummy variables capturing the household's social group (the lowest is the excluded category), and four asset quintile dummies (the bottom is the excluded category). In the regression  $y_{it}$  is the outcome,  $state$  is a dummy variable with 0 for MH and 1 for AP, and  $survey$  is a dummy variable with 0 for 2004 survey and 1 for 2012 survey. The coefficient for the interaction term,  $\beta_3$ , gives the differences in differences estimate,  $Y_{DD}$ . Robust standard errors of  $Y_{DD}$  were calculated to account for clustering of households within FSUs using Stata survey commands. A positive value for  $Y_{DD}$

suggested that the change in the outcome in AP was more than the change in MH and the negative value would suggest the reverse.

An advantage of regression based DID estimate is this ability to use co-variates which can account for differential trajectories in the two states. In addition to this we did sub-group analysis stratifying for different co-variates. This is particularly relevant in the case of scheduled tribes whose proportion increased in MH in the follow up survey.

Sub groups were not mutually adjusted for the analysis due to sample size restrictions in relation to some of them.

#### *Role of the funding sources*

The external funding sources had no role in study design, data collection, analysis, interpretation or reporting, or in submission decision.

## RESULTS

A total of 5314 and 5059 households from Maharashtra and AP were surveyed by the NSSO in 2004 (Table 2). Our survey in 2012 included 10073 (MH) and 8623 (AP) households.

**Table 2. Socio-demographic characteristics of baseline and follow-up samples**

| Subgroups                | Number (%) of Households 2004 |                | Number (%) of Households 2012 |                |
|--------------------------|-------------------------------|----------------|-------------------------------|----------------|
|                          | Maharashtra                   | Andhra Pradesh | Maharashtra                   | Andhra Pradesh |
| <b>All</b>               | 5314                          | 5059           | 10073                         | 8623           |
| <b>Head of Household</b> |                               |                |                               |                |
| Male                     | 4785 (90.0)                   | 4433(87.6)     | 8543(84.8)                    | 7418(86.0)     |
| Female                   | 529 (10.0)                    | 626 (12.4)     | 1530 (15.2)                   | 1205 (14.0)    |
| <b>Social Group</b>      |                               |                |                               |                |
| Scheduled Tribes         | 413 (7.8)                     | 296 (5.9)      | 1364 (13.5)                   | 883 (10.2)     |
| Scheduled Castes         | 809 (15.2)                    | 974 (19.3)     | 2235 (22.2)                   | 1797 (20.8)    |
| Other Excluded           | 1644 (30.9)                   | 2317 (45.8)    | 1899 (18.9)                   | 3419 (39.7)    |
| All other Groups         | 2448 (46.1)                   | 1472 (29.1)    | 4571 (45.4)                   | 2524(29.3)     |
| <b>Location</b>          |                               |                |                               |                |
| Rural                    | 2,650 (49.9)                  | 3235 (63.9)    | 5035(50.0)                    | 4908 (57.0)    |
| Urban                    | 2664 (50.1)                   | 1824 (36.1)    | 5038 (50.0)                   | 3715(43.0)     |



| Asset Quintile |              |              |              |              |
|----------------|--------------|--------------|--------------|--------------|
| Lowest         | 1,260 (23.7) | 1,594(31.5)  | 996(9.9)     | 826(9.6)     |
| Second         | 1,016 (19.1) | 1,237 (24.5) | 1,841(18.2)  | 1,286(14.9)  |
| Third          | 772 (14.5)   | 753(14.9)    | 2,228(22.1)  | 2,121(24.60) |
| Fourth         | 857 (16.1)   | 744(14.7)    | 2,373 (23.6) | 3,072(35.6)  |
| Fifth          | 1,408(26.5)  | 730(14.4)    | 2,633(26.1)  | 1,318(15.3)  |

### Changes in average in-patient expenditure

Table 3 (top panel) shows average baseline levels of inpatient expenditure. The table also shows the real terms change (deflated to 2004 prices) in these outcomes at follow up and the difference in difference (DID) estimate comparing AP with MH. DID's for overall results are shown unadjusted, as well as adjusted for the effects of the covariates. Breakdowns by sex of head of household, social group, urban/rural location and asset quintiles are also shown.

Overall, average inpatient expenditure increased in real terms in both the states between 2004 and 2012, but the increase was significantly greater in MH (unadjusted DID= -498.2 INR, 95% CI= -792.9: -203.5, p=0.0009). The trend of a greater increase in MH was evident across all sub groups of analysis except the richest asset quintile. However, the DID's reached significance in male headed households (DID=-513.7INR, 95% CI= -843.9: -183.4, p=0.0023), scheduled castes (DID= -708.7INR , 95% CI=-1234.3: -183.2, p=0.0082), all 'other' social groups (DID=-1110.46INR, 95% CI=-1868 : -352.9, p=0.0041), rural households (DID= -504 INR, 95% CI= -801.9: -206.0, p=0.0009) and the poorest (DID= -1001.3 INR, 95% CI= -1751: -251.7, p= 0.0089) and middle asset quintiles (DID= -798.1 INR, 95% CI= -1362.9:-233.3, p= 0.0056).

**Table 3: Change in average inpatient expenditure (in INR) in Maharashtra and Andhra Pradesh between 2004 and 2012**

| Subgroups                              | Baseline Mean (95% CI) |                    | Change 2004:2012 Mean (95% CI) |                      | DID                                  |        |
|----------------------------------------|------------------------|--------------------|--------------------------------|----------------------|--------------------------------------|--------|
|                                        | Maharashtra            | Andhra Pradesh     | Maharashtra                    | Andhra Pradesh       | Mean (95%CI)                         | p      |
| <b>Household inpatient expenditure</b> |                        |                    |                                |                      |                                      |        |
| <b>All</b>                             | 1091.6(978.4:1204.8)   | 723.5(527.5:919.5) | 942.8(749.9:1135.6)            | 444.55(221.5: 667.6) | -498.2(-792.9:-203.5)                | 0.0009 |
|                                        |                        |                    |                                |                      | <b>DID (adjusted for covariates)</b> |        |
|                                        |                        |                    |                                |                      | -565.8(862.9: -268.6)                | 0.0002 |
| <b>Head of Household</b>               |                        |                    |                                |                      |                                      |        |
| Male                                   | 1,132.9(1015:1,251)    | 758(419.7:1,096.3) | 935(727:1,143.01)              | 1074.9(555.9:1593.8) | -513.7(-843.9: -183.4)               | 0.0023 |

|                     |                         |                      |                       |                        |                        |        |
|---------------------|-------------------------|----------------------|-----------------------|------------------------|------------------------|--------|
| Female              | 757.1(555.5:1014.6)     | 341.1(222.3:460.01)  | 421.3(164.7:678.0)    | 589.9(307.22:872.8)    | -484.9(-1075.6:105.9)  | 0.1076 |
| <b>Social Group</b> |                         |                      |                       |                        |                        |        |
| Scheduled Tribes    | 376.6(231.7:521.6)      | 432.7(212.52:652.9)  | 1153.1(803.3:1502.9)  | 675.2(163.2:1187.2)    | -477.9(-1097.7:142)    | 0.1307 |
| Scheduled Castes    | 696.7(500.2:893.2)      | 432.6(305.6:559.4)   | 1464.1(1039.9:1888.4) | 755.4(444.9:1065.9)    | -708.7(-1234.3:-183.2) | 0.0082 |
| Other Excluded      | 1,028.6(838.4:1218.8)   | 562.4(463.7:662)     | 928.9(532.9:1324.9)   | 767.9(569.6:966.2)     | -161(-603.7:281.7)     | 0.4758 |
| All other Groups    | 1,424.5(1,222.3:1626.7) | 1306.2(627.8:1984.6) | 734.9(427.9:1041.7)   | -375.6(-1,068.5:317.4) | -1110.46(-1868:-352.9) | 0.0041 |
| <b>Location</b>     |                         |                      |                       |                        |                        |        |
| Rural               | 897.8(768.1:1027.5)     | 571.4(496.2:646.6)   | 1084.7(826.3:1343.1)  | 580.7(432.2:729.2)     | -504(-801.9:-206.0)    | 0.0009 |
| Urban               | 1343.5(1146.1:1540.9)   | 1113.5(466.2:1760.8) | 753.6(458.7:1048.6)   | 92.3(-586.92:771.5)    | -661.3(-1401.5:78.864) | 0.0799 |
| <b>Quintile</b>     |                         |                      |                       |                        |                        |        |
| poorest             | 656.3(498.0:814.6)      | 391.5(319:464.1)     | 1692.5(1053.3:2331.7) | 691.2(298.9:1083.5)    | -1001.3(-1751:-251.7)  | 0.0089 |
| 2nd                 | 786.5(583.5:989.5)      | 443.3(356.5:530.2)   | 979.3(599.4:1359.2)   | 839.5(465.7:1213.3)    | -139.8(-672.5:393)     | 0.607  |
| middle              | 1062.7(738.8:1386.1)    | 862.1(577.8:1146.5)  | 1011.8(550.2:1473.4)  | 213.7(-112.1:539.6)    | -798.1(-1362.9:-233.3) | 0.0056 |
| 4th                 | 1241.7(894.4:1589.1)    | 1819(337.5:3302.5)   | 803.6(328.7:1278.5)   | -644.3(-2128.3:839.7)  | -1447.9(-3005.2:109.5) | 0.0684 |
| richest             | 1818.6(1505.5:2131.8)   | 908.3(682.1:1133.4)  | 252.3(-193.4:698.1)   | 362.1(15.3:708.9)      | 109.7(-454.80:674.3)   | 0.7031 |

### Large expenditures for inpatient care

Proportions of households incurring large expenditures showed an increase in both states (Table 4), but the increase was smaller in AP for the sample as a whole as well as for all the groups except for the second asset quintile. The DID was strongly significant for the households overall (adjusted DID=1.8, 95% CI: -3:-0.7, p= 0.0009), but this was not observed for any of the sub groups of analysis.

**Table 4: Change in the proportion (%) of households incurring large health expenditures for inpatient care in Maharashtra and AP between 2004 and 2012**

| Subgroups                                                        | Baseline Mean (95% CI) |                | Change 2004:2012 Mean (95% CI) |                | DID              |        |
|------------------------------------------------------------------|------------------------|----------------|--------------------------------|----------------|------------------|--------|
|                                                                  | Maharashtra            | Andhra Pradesh | Maharashtra                    | Andhra Pradesh | Mean (95%CI)     | p      |
| <b>Large IP expenditure (INR 23000 deflated to 2004 figures)</b> |                        |                |                                |                |                  |        |
| All                                                              | 6.7(6:7.3)             | 3.4(2.9:3.9)   | 3.1(2.1:4.1)                   | 2.2(1.5:2.8)   | -0.91(-2.1:0.27) | 0.1302 |



|                          |                |               |                |                   | DID (adjusted for covariates) |        |
|--------------------------|----------------|---------------|----------------|-------------------|-------------------------------|--------|
|                          |                |               |                |                   | -1.8(-3:-0.7)                 | 0.0009 |
| <b>Head of Household</b> |                |               |                |                   |                               |        |
| Male                     | 6.8(6.2:7.6)   | 3.5(3.1:4)    | 3.1(2.0:4.1)   | 2.1(1.5:2.9)      | -0.8(-2.1:-0.4)               | 0.1928 |
| Female                   | 5.0(3.7:6.4)   | 2.8(1.9:3.7)  | 3.9(2:5.8)     | 2(6.6:3.4)        | -1.8(-4.2:0.50)               | 0.1222 |
| <b>Social Group</b>      |                |               |                |                   |                               |        |
| Scheduled Tribes         | 2.2(1.3:3.1)   | 1.4(0.5:2.2)  | 5.3(3.5:7)     | 3.5(1.9:5.1)      | -1.7(-4.1:0.61)               | 0.1478 |
| Scheduled Castes         | 6.1(4.6:7.7)   | 2.1(1.5:2.6)  | 4.3(2.3:6.3)   | 3(1.9:4.1)        | -1.2(-3.5 :1.01)              | 0.2785 |
| Other Excluded           | 5.9(4.7:7.0)   | 3.3(2.7:3.8)  | 2.9(1.1:4.6)   | 2.7(1.7:3.6)      | -2.1(-2.2:1.8)                | 0.8389 |
| All other Groups         | 8.3(7.5:7.9)   | 5.4(4.4:6.3)  | 2.2( 0.9:3.6)  | 0.51(-0.7:1.7)    | -1.7(-3.5:0.04)               | 0.0628 |
| <b>Location</b>          |                |               |                |                   |                               |        |
| Rural                    | 1.9(1.5:2.2)   | 0.9(0.79:1.1) | 1.7(1.1:2.3)   | 1.3(0.09:1.6)     | -0.45(-1.1:0.25)              | 0.2098 |
| Urban                    | 12.9(11.9:14)  | 9.7(8.9:10.7) | 4.4(3.0:5.7)   | 3.9(2.6:5.3)      | -0.7(-2.4: 1.5)               | 0.6350 |
| <b>Quintile</b>          |                |               |                |                   |                               |        |
| poorest                  | 1.8(1.3:2.4)   | 1.1(0.8:1.4)  | 3.7(2.2:5.2)   | 1.7(0.7:2.7)      | -0.2(-3.8:-0.19)              | 0.0307 |
| 2nd                      | 2.7(1.9:3.5)   | 1.2(0.9:1.5)  | 2.1(0.93:3.3)  | 2.2(1.4:3.1)      | 0.9(-1.4:1.6)                 | 0.9079 |
| middle                   | 6.9(4.9:8.9)   | 4.2(3.1:5.3)  | 1.3(-1:3.6)    | 0.9(-1.2:1.4)     | -1.2(-3.9:1.4)                | 0.3596 |
| 4th                      | 10.7(8.7:12.6) | 7.6(5.9: 9.2) | 1.8(-0.57:4.3) | -0.036(-1.9:1.80) | -1.9(-4.9:1.2)                | 0.2268 |
| richest                  | 13.5(12:14.9)  | 9.6(8.1:11.2) | 0.3(-1.6:2.2)  | -0.6(-2.8:1.6)    | -0.9(-3.7:2)                  | 0.5601 |

### Changes in large borrowing for inpatient care

In both states proportions of households incurring large borrowings to meet inpatient expenses increased from 2004 to 2012 (Table 5). However, there was a consistent pattern of smaller increases in AP for the overall population, as well as all subgroups (except the richest asset quintile) with DID's strongly significant for the overall population (adjusted DID=-4, 95% CI: -6.6:-1.4, p= 0.0032), scheduled tribes (DID= -5.5, 95% CIs:-9.3:-1, p= 0.0048), rural households (DID= -4.7, 95% CIs: -7.3 : -2.1, p= 0.0007) and all asset quintiles except the richest (the poorest asset quintile DID= -9.0, 95% CI: -14.0: -4.4, p=0.0002).

**Table 5: Change in the proportion (%) of households large borrowings for in-patient care in Maharashtra and AP between 2004 and 2012**

| Subgroups                                               | Baseline Mean (95% CI) |                | Change 2004:2012 Mean (95% CI) |                | DID                                  |        |
|---------------------------------------------------------|------------------------|----------------|--------------------------------|----------------|--------------------------------------|--------|
|                                                         | Maharashtra            | Andhra Pradesh | Maharashtra                    | Andhra Pradesh | Mean (95%CI)                         | p      |
| <b>Proportion of households having large borrowings</b> |                        |                |                                |                |                                      |        |
| <b>All</b>                                              | 7.5(6.7:8.2)           | 3.8(3:4.5)     | 8.9(6.8:11)                    | 5.3(3.4:7.2)   | -3.7(-6.4:-0.908)                    | 0.0100 |
|                                                         |                        |                |                                |                | <b>DID (adjusted for covariates)</b> |        |
|                                                         |                        |                |                                |                | -4(-6.6:-1.4)                        | 0.0032 |
| <b>Head of Household</b>                                |                        |                |                                |                |                                      |        |

|                     |                    |                    |                     |                     |                      |        |
|---------------------|--------------------|--------------------|---------------------|---------------------|----------------------|--------|
| Male                | 7.8(7.0:8.5)       | 3.9(3.1:4.7)       | 9.8(6.6:1.3)        | 5.3(3.3:7.3)        | -3.6( -6.6: -0.62)   | 0.0187 |
| Female              | 5(3:7)             | 2.9(1.7:4.1)       | 8.(6.6:11.2)        | 5(2.9:7.23)         | -4.7(-8.3:-1)        | 0.0137 |
| <b>Social Group</b> |                    |                    |                     |                     |                      |        |
| Scheduled Tribes    | 3.6(2.3:4.9)       | 2.4(0.93:3.9)      | 11(8.9:14)          | 5.8(2.8:8.8)        | -5.5( -9.3: -1.8)    | 0.0048 |
| Scheduled Castes    | 7.2(5.5:8.8)       | 3(1.7:4.2)         | 9.6(6.6:13)         | 5.8(3.4:8.3)        | -3.8( -7.5:0.03)     | 0.0518 |
| Other Excluded      | 8.0(6.8:9.2)       | 3.5(2.7:4.4)       | 8(5.8:10.3)         | 5.3( 3.2:7.4)       | -2.8( -5.7:0.19)     | 0.0661 |
| All other Groups    | 8(7.15:8.8)        | 0.052(.040:0.064)  | 8.8(5.9:12)         | 4.7(2.2:7.4)        | -4.1(-7.9:-4.0)      | 0.0302 |
| <b>Location</b>     |                    |                    |                     |                     |                      |        |
| Rural               | 6.5(5.6:7.5)       | 0.03(0.024:0.038)  | 10(8.5:12)          | 5.8(3.9:7.6)        | -4.7( -7.3:-2.1)     | 0.0007 |
| Urban               | 8.7(7.3:10)        | 0.056(0.048:0.064) | 7.0(4.5:9.5)        | 4(1.1:6.9)          | -3.0(-6.7:0.68)      | 0.1081 |
| <b>Quintile</b>     |                    |                    |                     |                     |                      |        |
| poorest             | 5.2(3.9:6.5)       | 0.025(0.016:0.033) | 12.1(7.8:16)        | 3.1(1.3:0.049)      | -9(-14:-4.4)         | 0.0002 |
| 2nd                 | 0.064(0.048:0.08)  | 0.027(0.021:0.032) | 0.095(0.070:0.12)   | 0.052(0.034:0.070)  | -0.043(-.073: -.013) | 0.0062 |
| middle              | 0.074(0.050:0.098) | 0.048(0.031:0.065) | 0.10(.073:0.133)    | 0.044(0.013:0.076)  | -0.059( -.100:-.017) | 0.0069 |
| 4th                 | 0.087(0.063:0.110) | 0.06(.041:0.078)   | 0.083(0.061:0.104)  | 0.039(0.014:0.064)  | -0.044(-.075:-.012)  | 0.0076 |
| richest             | 0.10(0.090:0.12)   | 0.064(0.049:0.079) | 0.045(0.0035:0.086) | 0.049(-.0068:0.105) | 0.0045( -.062:0.071) | 0.8937 |

### Hospital utilisation for in-patient care

Overall, hospitalisation rates have increased in both AP and Maharashtra (Table 6) but more so in AP (5.6 per 1000 population vs 2.2), although the DID was not statistically significant. The sub group analysis presented a mixed picture. For both male and female headed households there was a greater increase in hospitalisation in AP, but this reached moderate statistical significance only for female headed households (DID=27.6, 95% CI =1.1:54.1, p-value = 0.0415). There is an increase in hospitalisations among scheduled tribes in Maharashtra and a reduction in AP (DID = -19.8, 95% CI = -37.3: -2.3, p-value = 0.0272) but the opposite trend was seen among 'other excluded' groups with an increase in AP and a reduction in MH (DID = 12.5, 95% CI= 1.2:23.9 p-value = 0.0309). In scheduled castes hospitalisations had increased in both states but more so in AP, while in the 'other' group there was a small increase in MH and a small reduction in AP. In the poorest quintile, the increase in hospitalisation was significantly greater in MH (DID= -14.4, 95%CI=-28:-0.31, p= 0.0451).

**Table 6: Changes in hospitalisation (per 1000 population) in Maharashtra and AP between 2004 and 2012**

| Subgroups                                   | Baseline Mean (95% CI) |                 | Change 2004:2012 Mean (95% CI) |                | DID                   |        |
|---------------------------------------------|------------------------|-----------------|--------------------------------|----------------|-----------------------|--------|
|                                             | Maharashtra            | Andhra Pradesh  | Maharashtra                    | Andhra Pradesh | Mean (95%CI)          | p      |
| <b>Hospitalizations per 1000 population</b> |                        |                 |                                |                |                       |        |
| <b>All</b>                                  | 41.3(37.3:45.2)        | 31.5(27.8:35.3) | 2.2 (-4.7:9.1)                 | 5.6(-1.1:12.3) | 3.4( -5.9 :12.7)      | 0.4636 |
|                                             |                        |                 |                                |                | <b>DID (adjusted)</b> |        |
|                                             |                        |                 |                                |                | 0.7(-8.6:10.2)        | 0.8685 |

| Head of Household   |                     |                  |                     |                   |                    |        |
|---------------------|---------------------|------------------|---------------------|-------------------|--------------------|--------|
| Male                | 41.0(37.1:44.9)     | 31.7 (16.9:34.0) | 1.9( -5.1:8.8)      | 4.4( -2.4:11.1)   | 2.5( -6.9:11.9)    | 0.5966 |
| Female              | 51.6 (30.6:72.5)    | 25.5(27.7:35.7)  | 13.9( -7.53:35.4)   | 41.5 ( 24.6:58.4) | 27.6( 1.1:54.1)    | 0.0415 |
| <b>Social Group</b> |                     |                  |                     |                   |                    |        |
| Scheduled Tribes    | 23.7(14.2 :33.1615) | 35.5(21.9:49.1)  | 17.1(5.8:28.5)      | -2.7(-16.95:11.5) | -19.8(-37.3: -2.3) | 0.0272 |
| Scheduled Castes    | 42.4(36.3:48.4)     | 29.5(22.6:36.5)  | 3.9(-7.9:15.7)      | 7.6( -2.6:17.7)   | 3.7( -11.4:18.7)   | 0.6268 |
| Other Excluded      | 44.2(38.2:50.2)     | 29.9( 25.5:34.3) | -1.9(-11.2 :7.3109) | 10.6(3.4:17.8)    | 12.5(1.2:23.9)     | 0.0309 |
| All other Groups    | 42.5(37.1:47.9)     | 34.9(29.0:40.9)  | 0.93(-7.3:9.1)      | -1.1(-9.4: 7.4)   | -2.0( -13.5 :9.4)  | 0.7235 |
| <b>Location</b>     |                     |                  |                     |                   |                    |        |
| Rural               | 36.6(32.2:41)       | 28.9(26.4:31.5)  | 9.5(3.5:15.4)       | 8.8(2.2:15.3)     | -0.69( -9.3:7.9)   | 0.8725 |
| Urban               | 48.2(43.7:53)       | 38.2(35.5:41.2)  | -7.9(-14.5: -1.3)   | -2.5( -12.1:7.1)  | 5.4(-5.8:16.6)     | 0.3358 |
| <b>Quintile</b>     |                     |                  |                     |                   |                    |        |
| poorest             | 31.4(25.9:36.9)     | 27.5(22.8:32.1)  | 20.7(9:32.8)        | 6.4( -1.7:14.4)   | -14.4(-28:-0.31)   | 0.0451 |
| 2nd                 | 36.5(28.3:44.7)     | 27.1(21.9:32.4)  | 8(0.5:15.4)         | 8.9( -5.6:18.4)   | 0.9( -10 : 12.5)   | 0.8746 |
| middle              | 47.8(33.6:62.1)     | 35.3(29.0:41.6)  | -1.5(-17.9:14.8)    | 4.1(-5.6:13.7)    | 5.6( -12.8:24.0)   | 0.5457 |
| 4th                 | 46.9(39.9:53.9)     | 41.7(32.7:50.8)  | -4.0( -12:3.4)      | -5.1( -15.7:5.4)  | -0.75( -13.3:11.9) | 0.9056 |
| richest             | 51.0(46:56.1)       | 36.5(25.8:47.2)  | -13.1(-18.9: -7.1)  | 1.5( -19.5:22.6)  | 15.0( -5.8: 3.6)   | 0.1665 |
|                     |                     |                  |                     |                   |                    |        |

### LIMITATIONS OF THE STUDY

Difference in difference estimations aimed at assessing the impacts of interventions, assume that both populations demonstrate similar characteristics prior to the start of the intervention, and that 'unobservables' follow a common trend; under such circumstances, any differences in changes observed over time between the 2 populations are attributable to the interventions<sup>39, 40</sup>. Despite AP and Maharashtra having broadly similar socio-economic profiles, as well as our DID analysis taking account of a number of covariates, there may have been other factors resulting in unobserved differential changes between the 2 populations and to which the results of the DID analysis may be at least partially attributable.

A second limitation could arise from the impact of other public health programmes implemented during the period 2004 to 2012. The most significant of these is the National Rural Health Mission launched in 2005, mainly to improve maternal and child health through the revitalization of rural primary care and child and maternal health services. A key assumption of our study is that the impacts of the NRHM in terms of healthcare expenditure for maternal and child health care would have been similar in both states, as this was a nationwide development. Despite the improvements in the public sector maternal and child health services sought by the NRHM, it is widely recognised that the public, including BPL families, continues to pay OOP for private health care. We have assumed that this behaviour is likely to be similar across the 2 states. Other health initiatives such as the Navsanjeevani Yojana and HMRI were unlikely to have had an impact on inpatient care or expenditure. The 108 scheme had the potential, in AP, to influence hospitalisation rates, by helping more households to visit hospitals when seriously ill. But the effect is likely to be small as the majority of even serious illnesses do not result in a 108 call for transport. The implementation of the RSBY and the scheme to make private hospital beds available for the poor in MH may have diluted the DID, although both schemes are known to have been only partially implemented.

1  
2  
3 Lastly, the 2004 NSSO survey which served as our baseline, was carried out between January and  
4 June 2004. Our end-line 2012 survey was carried out over a period of 3 months from June to  
5 September. The morbidity and mortality patterns recorded in different time periods may vary, and  
6 could have influenced the data.  
7

## 8 DISCUSSION

9  
10 We found that average expenditure, large expenditures and large borrowings on inpatient care had  
11 increased in both MH and AP, but the increase was consistently smaller in AP across these 3  
12 outcome measures, and may be suggestive of Aarogyasri having a somewhat larger effect than RSBY.  
13 Similar increases in institutional deliveries across the 2 states, and low levels of utilisation of RSBY  
14 and Jeevodayee schemes in MH may further strengthen this explanation.  
15

16  
17 The increase in average OOPE on inpatient care in AP and MH reflects a trend observed  
18 nationwide<sup>16,41</sup>. The Aarogyasri scheme may have contributed to the more favourable trajectory in  
19 AP both directly and indirectly, in that the scheme may have contributed to a reduction in the prices  
20 of interventions and an increase in competition among health care providers. The evaluation of the  
21 Yeshasvini scheme also found a significant reduction in the price of surgical interventions<sup>10</sup>. Our  
22 findings may suggest that the positive effects of Aarogyasri detected by other studies<sup>15,16</sup> at an early  
23 stage of the roll out of the scheme have been sustained. Automatic enrolment into the scheme, near  
24 universality of coverage and no requirement for enrollee contributions may have contributed to the  
25 significant DIDs in male headed households, scheduled castes, rural households and the poorest and  
26 middle asset quintiles. But these benefits were not demonstrated in some of the most vulnerable  
27 groups - female headed households and scheduled tribes. This is consistent with the findings of  
28 other studies<sup>5,16</sup> which reported that the slightly less vulnerable may benefit more from such  
29 schemes, with non-financial barriers undermining access to services for the most vulnerable socio-  
30 economic groups. The case summaries below illustrate the obstacles they face. A similar observation  
31 was reported by the evaluation of the Mexican Seguro Popular health scheme which showed that a  
32 third of the treatment-cluster households who were automatically affiliated were unaware of this  
33 fact<sup>42</sup>.  
34

35  
36 The likely explanation of an Aarogyasri effect may be strengthened by the trend for large borrowings  
37 which has also increased over time in both states but less so in AP across all groups of analysis  
38 except the richest asset quintile. A multi-country analysis of household catastrophic health  
39 expenditure highlighted that increasing the availability of health services is critical to improving  
40 health in poor countries, but it could also raise the proportion of households facing catastrophic  
41 expenditure unless financial risk protection policies are given a high priority<sup>43</sup>. Borrowing of  
42 comparatively small amounts is less impactful and may be a result of improved access to financial  
43 markets and also supports consumption smoothing. During recent decades, AP has in particular  
44 witnessed a significant rise in microfinance institutions and debt due to high levels of interest levied  
45 by the more recent entrants to this market<sup>44,45</sup>. Nevertheless our results suggest that increases in  
46 large borrowings associated with inpatient health care were smaller in AP. Strongly significant DIDs  
47 in scheduled tribes, rural households and the poorest and second asset quintiles and moderately  
48 significant DIDs in female headed households, scheduled castes, and other excluded social groups  
49 may also point to Aarogyasri beginning to offer greater access to health care when families are faced  
50 with serious illness.  
51

52  
53 In terms of large OOPE, a significant DID was found only for the total households, but the direction  
54 of all DIDs except for the second asset quintile was the same as for average expenditure on inpatient  
55 care and large borrowings, i.e., in favour of AP. It is perfectly possible that the non-significant  
56 differences for the majority of sub groups are due at least in part to the RSBY, the availability of  
57 private sector hospital beds for the poor and the Jeevodayee schemes reducing large OOPE in MH,  
58  
59  
60

1  
2  
3 and that without these schemes the expenditure would have been greater. In AP, 70 percent of  
4 survey households reported that they were covered by the Aarogyasri scheme, but only 25 percent  
5 of these 'covered' households were aware that the benefit package was limited. It is also possible  
6 therefore that in AP some families seek hospital care assuming that the Aarogyasri scheme provides  
7 comprehensive cover, but are faced with large expenditures when their treatments fall outside the  
8 limits.  
9

10 The mixed picture in relation to the increasing rate of hospitalisations in both states may suggest  
11 that the Aarogyasri and in particular, the RSBY scheme which covers common hospital procedures  
12 are addressing a large hitherto unmet need for inpatient care. The 108 scheme in AP may be an  
13 additional albeit smaller contributor. It may also be explained by a supplier-induced demand. An  
14 assessment of health provider behaviour and governance is an important strand of the evaluation of  
15 health financing schemes<sup>46</sup>, but was outside the remit of our study. We would however strongly  
16 recommend an impact evaluation focusing on health care supply to complement our evidence.  
17 The greater increase in hospitalisation in AP, in female-headed households and 'other excluded  
18 groups', which are two of the most vulnerable population groups, is encouraging. But the reduction  
19 in hospitalisations among scheduled tribes and the poorest asset quintile in AP are of concern and  
20 suggest that if the poor are to secure the benefits appropriated by the near poor or more often by  
21 the rich<sup>47</sup>, the provision of more comprehensive health schemes is essential, which combines the  
22 tertiary and secondary care focus of Aarogyasri and the secondary care benefits of RSBY with  
23 attention paid to minimise barriers such as the widespread influence of illiteracy and lack of  
24 awareness, which limit access to even schemes such as Aarogyasri that are apparently highly  
25 inclusive and non-discriminatory, as well as distance to facilities. Our case summaries illustrate this.  
26 Furthermore, health financing reforms such as the Jamkesmas<sup>48</sup> in Indonesia and the Seguro Popular  
27 in Mexico<sup>42</sup>, both countries similar to India in terms of population and growing economies, include  
28 outpatient and inpatient care, and curative as well as preventive services, suggesting that a more  
29 comprehensive service is possible to implement and worthy of consideration.  
30  
31  
32

33 In summary, health innovations in AP had a greater beneficial effect on hospital inpatient care-  
34 related expenditures than innovations in MH. The Aarogyasri scheme is likely to have contributed to  
35 these impacts in AP, at least in part. But in both states, OOPE increased over time. Hospitalisations  
36 also increased, and while it is generally assumed that in developing countries this is likely to address  
37 genuine need, its impact on health status is not known.  
38

### 39 **IMPLICATIONS FOR POLICY AND PRACTICE**

40  
41 Despite these uncertainties, Aarogyasri is perceived, with some justification across India as a  
42 successful scheme, and is being rapidly replicated across the states. Since July 2012, MH too has  
43 joined the list of states offering an Aarogyasri-like scheme, the Rajiv Gandhi Jeevandayee Arogya  
44 Yojana<sup>49</sup>. This study has highlighted that such schemes may result in some positive outcomes.  
45 Although the study was not designed to elicit the specific features of the scheme to which any  
46 comparatively greater benefits may be attributable, and which deserve to be replicated in other  
47 states, evidence from systematic reviews<sup>3</sup> points to the need for schemes to be more  
48 'comprehensively' designed to maximise their positive impact. Aarogyasri's design in terms of its  
49 aims to address both financial and non-financial barriers - being fully state funded, the systematic  
50 administrative implementation of Aarogyasri across the state so that it is now almost universal,  
51 automatic enrolment, allowing access to the scheme via a ration card which most poor families own,  
52 the wide spectrum of treatments offered, the large number of health care providers empanelled - is  
53 perhaps responsible as a 'comprehensive' package, for the greater impact.  
54  
55

56  
57 But the study also suggests that improved access to health care and the reduction of the overall  
58 burden of OOPE especially in the most vulnerable sections of the population<sup>50</sup> are likely to require  
59  
60

1  
2  
3 additional interventions that address gaps in the availability of care and provide patients appropriate  
4 pathways that support their journey from a strong and comprehensive primary care service where  
5 they may be informed of their entitlements and investigated for their initial symptoms to  
6 appropriate hospitals for the treatment of serious illness. Besides, inpatient care is only consumed  
7 by a small proportion of households in a year<sup>51</sup>, and this is especially true of tertiary care, while  
8 many more will seek outpatient services and referral to inpatient care, should this be required.  
9 Others have strongly recommended the strengthening of the primary care base as an essential  
10 means to universal health coverage and this study confirms their view<sup>41</sup>. Key implications for AP are  
11 to explore how best the most advantageous features of Aarogyasri can be extended to include both  
12 secondary and primary care, while those for MH may be to build on and unify its menu of currently  
13 available schemes to create an evidence-based comprehensive health delivery system. These  
14 conclusions may be applicable to other states with similar health financing schemes.  
15  
16

17 The design of health financing systems as well as their evaluations is complex and challenging, as the  
18 mountain of available evidence suggests<sup>41, 42, 51, 52</sup>. Even the ground-breaking Seguro Popular health  
19 insurance programme of Mexico which used a cluster-randomised trial design with strong  
20 government support demonstrated some but not all anticipated outcomes, contrary to  
21 expectations<sup>42</sup>, and a key recommendation was that continued assessment of the programme was  
22 needed. Furthermore, differences in data and methodology may result in even very well designed  
23 evaluations of the same programme producing contrasting findings<sup>52</sup>. Our evaluation is the first to  
24 use a quasi-experimental methodology - the best possible in the hierarchy of evaluation  
25 methodologies, when a randomised control trial is not achievable - to evaluate the health financing  
26 reforms in 2 large states of India. Despite that, the study has limitations which we have  
27 acknowledged. For example, the evaluation was not designed to assess provider behaviours. Many  
28 other pertinent questions such as the impact of the schemes on the overall economy of health care  
29 cannot be answered by a single evaluation. But these are recognised problems which can only be  
30 addressed through continuous assessments, as other evaluations have shown. Our study has  
31 nevertheless produced sufficient insights to enable policy leaders to improve programme  
32 effectiveness and, importantly, to undertake further assessment. Our household survey data provide  
33 a valuable baseline for future monitoring in both states.  
34  
35

36 This study needs to be followed up with further and repeated evaluations as AP's and MH's schemes  
37 evolve; to assess the impacts of re-design and to help health policy leaders achieve their aspiration  
38 of universal access to good quality health care.  
39  
40  
41  
42  
43

### Three faces of the Aarogyasri Scheme

#### The beneficiary:

Lakshamma, a 65 year old widow, is from a tribal background. She is an unskilled labourer, supporting a family of 5, with a monthly income of INR 4000 (USD 74). She was referred to a municipal hospital with chest pain and underwent heart surgery. The hospital which is a part of the Aarogyasri network provided free care and her total out of pocket expenses amounted to INR 850 (16 USD) for initial transport. In addition to the surgery, she received free food, money for transport home and follow up medicines. She is very satisfied with the service she received.

#### The excluded:



1  
2  
3  
4  
5  
6  
7  
8  
9  
10  
11  
12  
13  
14  
15  
16  
17  
18  
19  
20  
21  
22  
23  
24  
25  
26  
27  
28  
29  
30  
31  
32  
33  
34  
35  
36  
37  
38  
39  
40  
41  
42  
43  
44  
45  
46  
47  
48  
49  
50  
51  
52  
53  
54  
55  
56  
57  
58  
59  
60

Ramulamma, a mother has a BPL card, but her daughter Lakshmi does not, as she was abandoned by her husband who is a government employee and entitled to free health care. The mother was unable to secure free care using her BPL card for her seriously ill daughter who paid out-of-pocket at a private facility where she was offered a hysterectomy for the relief of her gynaecological symptoms. Lakshmi's health care costs were met by the family selling a number of household assets and Lakshmi's daughter discontinuing her education to take up paid work. Lakshmi is severely depressed and does not speak to anyone.

**The uninformed:**

Krishnamma 43 years old, had severe stomach pains one night. Although the family had a BPL card, Ramulu her husband and Srinivas her son rushed her to a private hospital nearby, which was not part of the Aarogyasri network. They were unaware of how to access the Aarogyasri scheme hospitals which were further away from home, and the local primary health services being inadequate, Krishnamma had not had her initial symptoms investigated. The treatment was funded through a loan from a private moneylender. On discharge, she has not attended follow up, as the family cannot afford transport or medicines.

peer review only

**ACKNOWLEDGEMENTS:**

The study was funded by International Development and Research Centre, Canada, Wellcome Trust, the UK Department for International Development, and Rockefeller Foundation. The World Bank supported Adam Wagstaff's contribution to the study. We gratefully acknowledge the financial support of these organisations, as well as the enthusiastic encouragement we have received from them throughout the study. Our thanks also go to Bhimasankaram Pochiraju, Sundaresh Peri, C Ravi, and Rahul Ahluwalia for their advice and guidance at various stages of the study design and data analysis, and to colleagues at the University of East London and Administrative Staff College of India Hyderabad for their administrative support. The authors also thank P Suryanarayana, CM Reddy, D Chakrapani and K Pandu Ranga Reddy and AY Jadhav and his colleagues for their contribution to the training of the survey teams, verification of the survey and data collection and acknowledge the IMRB International Social Research Institute team's support in carrying out the survey.

We are grateful to Somil Nagpal and Joseph Kutzin for commenting on the report and helping us to improve it, to Sujatha Rao for her encouragement and valuable suggestions and ideas throughout the course of the study and to Jay Bagaria for her help during the early stage of the development of the proposal. Finally we thank PV Ramesh without whose constant support, guidance and encouragement, this study would not have been possible.

**FUNDED BY :** Wellcome Trust, IDRC, Rockefeller Foundation, DFID, World Bank.

**CONTRIBUTORS' STATEMENT**

MR conceived and designed the study, applied for funding, and was responsible for the supervision and management of the study as well as the dissemination of its results. She is also the guarantor of the study. SB shared responsibility for the conception of the study, applications for funding, study design and data collation and analysis, contributed to the questionnaire design and commented on drafts of the report. PS contributed to the conception of the study and study design, led the questionnaire design and survey implementation, including training of survey staff, monitoring survey progress and data collation and verification, commented on drafts of the report and helped prepare the references. AK undertook the data collation, verification and analysis, assisted with the survey and questionnaire design and survey implementation and prepared the tables for the report. AS led the literature review, assisted with the study and questionnaire design, survey implementation and preparation and analysis of baseline data, and commented on drafts of the report. MK helped with the data analysis. AW devised the methodology for the estimation of the programme impacts, advised during the data-collection and data-preparation stages, wrote and implemented the computer code for the model estimation, helped to oversee the production of the results, and contributed text to the report. GN provided technical advice on accounting for the complex survey structure in the analysis, developed a STATA equation, helped to compute an asset index, advised on the output tables, verified the analysis and commented on drafts of the report. AR helped develop a conceptual framework for the evaluation, advised on funding proposals, the study design, analytical methodology and presentation of results and contributed text to the report. MR wrote the first draft of the paper and its redrafts in accordance with the comments of all other authors and reviewers.



### CONFLICT OF INTEREST

All authors have completed the ICMJE forms for disclosure of potential conflicts of interest (available on request from the corresponding author) and declare that 1) MR, AK, PS, AS, and SB have support from the Rockefeller Foundation, Wellcome Trust, International Development Research Centre, Canada and Department for International Development, UK, 2) the authors have no relationships with the funders that might have an interest in the submitted work in the previous 3 years, 3) the authors' spouses, partners, or children have no financial relationships that may be relevant to the submitted work, and 4) the authors have no non-financial interests that may be relevant to the submitted work.

**DATA SHARING STATEMENT:** The 2004 National Sample Survey Organisation of India household survey questionnaire and data are available to the public. The 2012 household survey questionnaire, and the full anonymised household survey dataset will be available with open access as soon as the data analyses and submissions for publication are completed.

**ROLE OF THE FUNDING SOURCES:** The external funding sources had no role in study design, data collection, analysis, interpretation or reporting, or in submission decision.

**ROLE OF THE STUDY SPONSOR:** The study was carried out in response to the formal invitation of the Government of Andhra Pradesh which supported our applications for funding (by providing formal letters of support). The Government did not provide any funding, and had no role in study design, data collection, analysis, interpretation or reporting, or in submission decision.

**STATEMENT OF INDEPENDENCE OF RESEARCHERS:** The authors can confirm that they worked independently from the Funders and Government of Andhra Pradesh who had no role in any aspect of the research

**ETHICAL APPROVAL:** given by the research ethics committee of the Administrative Staff College of India, Hyderabad, which hosted the study. Household survey questionnaires include signed consent by the head of the household or another adult representative of the household.

**COPYRIGHT STATEMENT:** Mala Rao, the Corresponding Author has the right to grant on behalf of all authors and does grant on behalf of all authors, an exclusive licence on a worldwide basis to the BMJ Publishing Group Ltd to permit this article (if accepted) to be published in BMJ editions and any other BMJ PGL products and sublicences such use and exploit all subsidiary rights, as set out in your licence.

**STROBE CHECKLIST FOR CROSS SECTIONAL STUDIES:** We can confirm that all 22 items in the STROBE checklist are included in the paper.

## References

- <sup>1</sup> Resolution WHA58.33. Sustainable health financing, universal coverage and social health insurance. In: *Fifty-eighth World Health Assembly, Geneva, 16–25 May 2005*. Geneva, World Health Organization, 2005 ([http://apps.who.int/gb/ebwha/pdf\\_files/WHA58/WHA58\\_33-en.pdf](http://apps.who.int/gb/ebwha/pdf_files/WHA58/WHA58_33-en.pdf), accessed 26<sup>th</sup> March 2013).
- <sup>2</sup> World Health Organization. Health Systems Financing Path to Universal Coverage. Geneva: World Health Organization. 2010. Available from: World Health Organization Library Information Services.
- <sup>3</sup> Acharya A, Vellakkal S, Taylor F, et al. Impact of national health insurance for the poor and the informal sector in low and middle income countries : a systematic review. London: EPPICentre, Social Science Research Unit, Institute of Education, University of London. 2012. Available from: <http://www.dfid.gov.uk/r4d/PDF/Outputs/SystematicReviews/Health-insurance-2012Acharya-report.pdf>
- <sup>4</sup> Giedion, U., B. Y. Diaz . A Review of the evidence. In: *The Impact of Health Insurance in Low-and Middle-Income Countries*. M. L. Escobar, C. Griffin and R. P. Shaw (ed). Washington DC, Brookings Inst Press 2011.
- <sup>5</sup> Giedion, U, Alfonso, E , Diaz. *The impact of universal coverage schemes in the developing world : a review of the existing evidence*. Universal Health Coverage (UNICO) studies series ; no. 25. Washington D.C. : The World Bank. 2013
- <sup>6</sup> National Commission on Macroeconomics and Health. Report of the National Commission on Macroeconomics and Health. New Delhi: Ministry of Health and Family Welfare of India. 2005. Available from: Ministry of Health and Family Welfare
- <sup>7</sup> Eleventh Five Year Plan (2007–2012). Vol 2: Social Sector. Government of India Planning Commission. October, 2008. [http://planningcommission.nic.in/plans/planrel/fiveyr/11th/11\\_v2/11th\\_vol2.pdf](http://planningcommission.nic.in/plans/planrel/fiveyr/11th/11_v2/11th_vol2.pdf), (accessed Mar 26 2013).
- <sup>8</sup> Faster, Sustainable and More Inclusive Growth. An Approach to the Twelfth Five Year Plan (2012-17). Government of India Planning Commission. October, 2011. [http://planningcommission.nic.in/plans/planrel/12appdrft/approach\\_12plan.pdf](http://planningcommission.nic.in/plans/planrel/12appdrft/approach_12plan.pdf), accessed 26th March 2013
- <sup>9</sup> La Forgia G, Nagpal S. Government-Sponsored Health Insurance in India. *Are You Covered?* World Bank Washington DC 2012. doi:10.1596/978-0-8213-9618-6.
- <sup>10</sup> Agarwal A. "Impact evaluation of India's 'Yeshasvini' community based health insurance programme. *Health Economics* 2010; 19: 5-35
- <sup>11</sup> See The scheme website at <https://www.aarogyasri.org/ASRI/index.jsp>, accessed 26<sup>th</sup> March 2013.
- <sup>12</sup> Scheme status. <http://www.rsby.gov.in/statewise.aspx?state=35> (accessed Apr 30 2013)
- <sup>13</sup> Mahal A. Learning and getting better: Rigorous evaluation of health policy in India. *National Medical Journal of India*. 2011. 325-27.
- <sup>14</sup> Aarogyasri Health Care Trust Annual Report 2011-2012. [https://www.aarogyasri.org/ASRI/EXT\\_IMAGES/documents/Annual\\_Report\\_201011.pdf](https://www.aarogyasri.org/ASRI/EXT_IMAGES/documents/Annual_Report_201011.pdf) (accessed Mar 26 2013)
- <sup>15</sup> Rao M, Ramachandra S, Bandyopadhyay S, et al. Addressing healthcare needs of people living below the poverty line: a rapid assessment of the Andhra Pradesh Health Insurance Scheme. *National Medical Journal of India*. 2011. 24(6):335-41.
- <sup>16</sup> Fan V, Karan A, Mahal A. "State Health Insurance and Out-of-Pocket Health Expenditures in Andhra Pradesh, India." CGD Working Paper 298. Washington, D.C.: Center for Global Development. 2012 <http://www.cgdev.org/content/publications/detail/1426275> (accessed Mar 15 2013)
- <sup>17</sup> Palacios R, Das J, Sun C eds. India's health insurance scheme for the poor: Evidence from the early experience of Rashtriya Swasthya Bima Yojana. New Delhi: Center for Policy Research; 2011
- <sup>18</sup> Rashtriya Swasthya Bima Yojana overview and scheme details. <http://www.rsby.gov.in> (accessed Apr 30 2013)
- <sup>19</sup> Rathi P. <http://www.priorities2012.com/documents/3d-4-patreek.pdf>
- <sup>20</sup> NRHM Mission Document. [http://www.nird.org.in/brgf/doc/Rural%20HealthMission\\_Document.pdf](http://www.nird.org.in/brgf/doc/Rural%20HealthMission_Document.pdf) (accessed Apr 30 2013)
- <sup>21</sup> State HMIS data analysis, April'10-March'11 Andhra Pradesh, prepared by NHSRC. [http://cfw.ap.nic.in/nrhm/pdf/AP\\_Analysis\\_Apr2010-Mar2011.pdf](http://cfw.ap.nic.in/nrhm/pdf/AP_Analysis_Apr2010-Mar2011.pdf) (accessed May 2 2013)
- <sup>22</sup> NRHM achievements in Maharashtra. <http://www.nrhm.maharashtra.gov.in/achievements.htm> (accessed May 2 2013)
- <sup>23</sup> Health information helpline. <http://www.hmri.in/oursolutions-healthinformation.html> (accessed Apr 30 2013)

- 1  
2  
3  
4  
5  
6  
7  
8  
9  
10  
11  
12  
13  
14  
15  
16  
17  
18  
19  
20  
21  
22  
23  
24  
25  
26  
27  
28  
29  
30  
31  
32  
33  
34  
35  
36  
37  
38  
39  
40  
41  
42  
43  
44  
45  
46  
47  
48  
49  
50  
51  
52  
53  
54  
55  
56  
57  
58  
59  
60
- <sup>24</sup> About the project/scheme. <http://www.maha-arogya.gov.in/projectandschemes/Jeevandaiaarogya/default.htm> (accessed Apr 30 2013)
- <sup>25</sup> Jeevandayee scheme performance: Information received from Rajiv Gandhi Jeevandayee Arogya Yojana Society Govt of Maharashtra on May 17 2013
- <sup>26</sup> Projects and schemes. <http://maha-arogya.gov.in/projectandschemes/itdpnavsanjivani%5Cdefault.htm> (accessed Apr 30 2013)
- <sup>27</sup> Mallepeddi R , Pernefeldt H, Bergkvist S . Andhra Pradesh health sector reform, A narrative case study, Technical paper No.7 for The Rockefeller Foundation–Sponsored Initiative on the Role of the Private Sector in Health Systems in Developing Countries. 2009 ; pp 42-48
- <sup>28</sup> EMRI. <http://www.emri.in/states.html> (accessed Apr 30 2013)
- <sup>29</sup> Developing and evaluating complex interventions: new guidance. Medical Research Council. London 2008.
- <sup>30</sup> Cesar G V, Jean-Pierre H, Jennifer B. Evidence-Based Public Health: Moving Beyond Randomized Trials. *Am J Public Health*. 2004 March; 94(3): 400–405.
- <sup>31</sup> Presentation on Annual Plan 2012-13 and Five Year Plan 2012-17. [http://planningcommission.nic.in/plans/stateplan/Presentations12\\_13/maharashtra1213.pdf](http://planningcommission.nic.in/plans/stateplan/Presentations12_13/maharashtra1213.pdf) (accessed on mar 25 2013)
- <sup>32</sup> National Sample Survey Organization. Morbidity, Healthcare and condition of the Aged. New Delhi: Ministry of Statistics and Programme Implementation. 2004.
- <sup>33</sup> National Sample Survey Organization. Household Consumer Expenditure 66<sup>th</sup> round . New Delhi: Ministry of Statistics and Programme Implementation; 2009-10
- <sup>34</sup> National Sample Survey Organization. Household Consumer Expenditure in India. New Delhi: Ministry of Statistics and Programme Implementation; 2005.
- <sup>35</sup> Booyesen F, Van der Berg S & Burger R. Using an Asset Index to Assess Trends in Poverty in Seven Sub-Saharan African Countries. *World Development*. 2008; 36(6): 1113–1130
- <sup>36</sup> Vyas S. & Kumarnayake L. Constructing socio-economic status indices: How to use principal components analysis. *Health Policy and planning*. 2006; 459-468
- <sup>37</sup> O'Donnell O, Van Doorslaer E, Wagstaff, et al. Analyzing Health Equity Using Household Survey Data: A Guide to Techniques and Their Implementation. Washington DC: World Bank Institute. Chapter 6, Measurement of Living Standards. <http://siteresources.worldbank.org/INTPAH/Resources/Publications/459843-1195594469249/HealthEquityFINAL.pdf> (accessed May 9 2013)
- <sup>38</sup> Ministry of Finance. Economic Survey 2011-12. New Delhi: Government of India. 2012. Available from: <http://indiabudget.nic.in/>
- <sup>39</sup> Poverty Reduction and Social Development Department. A User's Guide to Poverty and Social Impact Analysis. Washington: World Bank;2003
- <sup>40</sup> Gertler P, Martinez S, Premand P, et al. Impact Evaluation in Practice. Washington: World Bank; 2011.
- <sup>41</sup> Selvaraj S, Karan A. Why Publicly-Financed Health Insurance Schemes Are Ineffective in Providing Financial Risk Protection. *Economic and Political Weekly* 2012 March 17; XLVII(11):60-68
- <sup>42</sup> King G, Gakidou E, Imai K, et al. Public policy for the poor? A randomised assessment of the Mexican universal health programme. *Lancet*. 2009 Apr 8; DOI:10.1016/S0140-6736(09)60239-7.
- <sup>43</sup> Xu K, Evans DB, Kawabata K, et al. Household catastrophic health expenditure: a multicountry analysis. *Lancet*. 2003 Jul 12;362(9378):111-7.
- <sup>44</sup> Naga Sridhar G. Microfinance institutions: Moving beyond AP crisis. *The Business Line [Newspaper Online]*. 2012 Dec 29. Available from: <http://www.thehindubusinessline.com/companies/microfinance-institutions-moving-beyond-ap-crisis/article4253239.ece>
- <sup>45</sup> Naga Sridhar G. Life after microfinance in AP. *The Business Line [Newspaper Online]*. 2013 Jan 4. Available from: <http://www.thehindubusinessline.com/opinion/life-after-microfinance-in-ap/article4273183.ece>
- <sup>46</sup> Prasad N P, Raghavendra P. Healthcare models in the era of medical neoliberalism. A study of Aarogyasri in Andhra Pradesh. *Economic and Political Weekly* 2012 Oct 27;XLVII(43):118-126
- <sup>47</sup> Health Systems 20-20. An Evaluation of the Effects of the National Health Insurance Scheme in Ghana. Bethesda: Health Systems 20-20. 2009.
- <sup>48</sup> <http://www.jointlearningnetwork.org/programs/compare/benefits/142%2C16>
- <sup>49</sup> Rajiv Jeevandayi scheme details. <http://www.jeevandayee.gov.in/RGJAY/FrontServlet?requestType=CommonRH&actionVal=RightFrame&page=undefined%3E%3E%3Cb%3E%3ERGJAY%3C/b%3E&pageName=RGJAY&mainMenu=About&subMenu=RGJAY> (accessed on Apr 30 2013)

1  
2  
3  
4  
5  
6  
7  
8  
9  
10  
11  
12  
13  
14  
15  
16  
17  
18  
19  
20  
21  
22  
23  
24  
25  
26  
27  
28  
29  
30  
31  
32  
33  
34  
35  
36  
37  
38  
39  
40  
41  
42  
43  
44  
45  
46  
47  
48  
49  
50  
51  
52  
53  
54  
55  
56  
57  
58  
59  
60

---

<sup>50</sup> Tangcharoensathien V, Swasdiworn W, Jongudomsuk P et al . Universal Coverage Scheme in Thailand: Equity Outcomes and Future Agendas to Meet Challenges. Geneva: World Health Organization. 2010.

<sup>51</sup> Dilip TR. On Publicly-Financed Health Insurance Schemes. Is the analysis premature? Economic and Political Weekly. 2012 May 5; XLVII(18):79-80.

<sup>52</sup> Vallakal S, Ebrahim S. Publicly-Financed Health Insurance Schemes. Concerns about Impact Assessment. Economic and Political Weekly. 2013 Jan 5; XLVIII(1);24-27.

For peer review only

1  
2  
3  
4  
5  
6  
7 **TITLE PAGE**

8  
9 **TITLE:**

10  
11 **Trends in addressing inequalities in access to hospital care in Andhra Pradesh and Maharashtra**  
12 **states of India- A tale of two Indian states**  
13

14 **STUDY DESIGN:** A cross-sectional difference in difference study with parallel control.

15  
16 **AUTHOR NAMES, ADDRESSES AND POSITIONS:**

- 17  
18 1. Mala Rao. Professor of International Health, Institute for Health and Human Development,  
19 University of East London, UK & Honorary Adviser, Administrative Staff College of India, Hyderabad  
20  
21 2. Anuradha Katyal, Consultant, ACCESS Health International, Hyderabad, India  
22  
23 3. Prabal V Singh, Director Research, ACCESS Health International, Hyderabad, India  
24  
25 4. Amit Samarth, Head, Strategy and Planning, SughaVazhvu Healthcare, Thanjavur, India  
26  
27 5. Sofi Bergkvist, Managing Director, ACCESS Health International, Hyderabad, India  
28  
29 6. Manjusha Kancharla, Research Associate, Indian School of Business, Hyderabad India  
30  
31 7. Adam Wagstaff, Research Manager, Human Development & Public Services team, Development  
32 Research Group (DECRG), The World Bank, Washington DC, USA  
33  
34 8. Gopalakrishnan Netuveli. Professor of Public Health, Institute for Health and Human Development,  
35 University of East London & ESRC International Centre for Life Course Studies in Society and Health,  
36 University College London, UK  
37  
38 9. Adrian Renton. Director, Institute for Health and Human Development, University of East London,  
39 UK

40 **All authors had full access to all the data (including statistical reports and tables) and can take**  
41 **responsibility for the integrity of the data and the accuracy of the data analysis**

42 **Corresponding author and guarantor of the data and information:** Mala Rao (best email address:  
43 m.rao@uel.ac.uk).

44  
45 **M Rao affirms that the manuscript is an honest, accurate and transparent account of the study**  
46 **being reported and no important aspects of the study have been omitted.**  
47

48 **FUNDED BY :** Wellcome Trust, IDRC, Rockefeller Foundation, DFID, World Bank.

49  
50 **ROLE OF THE FUNDING SOURCES:** The external funding sources had no role in study design, data  
51 collection, analysis, interpretation or reporting, or in submission decision.

52  
53 **ROLE OF THE STUDY SPONSOR:** The study was carried out in response to the formal invitation of the  
54 Government of Andhra Pradesh which supported our applications for funding (by providing formal  
55

1  
2  
3  
4  
5  
6  
7 letters of support). The Government did not provide any funding, and had no role in study design,  
8 data collection, analysis, interpretation or reporting, or in submission decision.

9 **STATEMENT OF INDEPENDENCE OF RESEARCHERS:** The authors can confirm that they worked  
10 independently from the Funders and Government of Andhra Pradesh who had no role in any aspect  
11 of the research  
12

### 13 **CONFLICT OF INTEREST**

14  
15 All authors have completed the ICMJE forms for disclosure of potential conflicts of interest (available  
16 on request from the corresponding author) and declare that 1) MR, AK, PS, AS, and SB have support  
17 from the Rockefeller Foundation, Wellcome Trust, International Development Research Centre,  
18 Canada and Department for International Development, UK, 2) the authors have no relationships  
19 with the funders that might have an interest in the submitted work in the previous 3 years, 3) the  
20 authors' spouses, partners, or children have no financial relationships that may be relevant to the  
21 submitted work, and 4) the authors have no non-financial interests that may be relevant to the  
22 submitted work.  
23

24 **ETHICAL APPROVAL:** given by the research ethics committee of the Administrative Staff College of  
25 India, Hyderabad, which hosted the study. Household survey questionnaires include signed consent  
26 by the head of the household or another adult representative of the household.  
27  
28

29  
30 **DATA SHARING STATEMENT:** The 2004 National Sample Survey Organisation of India household  
31 survey questionnaire and data are available to the public. The 2012 household survey questionnaire,  
32 and the full anonymised household survey dataset will be available with open access as soon as the  
33 data analyses and submissions for publication are completed.  
34

35 **COPYRIGHT STATEMENT:** Mala Rao, the Corresponding Author has the right to grant on behalf of all  
36 authors and does grant on behalf of all authors, an exclusive licence on a worldwide basis to the BMJ  
37 Publishing Group Ltd to permit this article (if accepted) to be published in BMJ editions and any  
38 other BMJ PGL products and sublicences such use and exploit all subsidiary rights, as set out in your  
39 licence.  
40

41 **STROBE CHECKLIST FOR CROSS SECTIONAL STUDIES:** We can confirm that all 22 items in the  
42 STROBE checklist are included in the paper.  
43

### 44 **CONTRIBUTORS' STATEMENT**

45  
46 MR conceived and designed the study, applied for funding, and was responsible for the supervision  
47 and management of the study as well as the dissemination of its results. She is also the guarantor of  
48 the study. SB shared responsibility for the conception of the study, applications for funding, study  
49 design and data collation and analysis, contributed to the questionnaire design and commented on  
50 drafts of the report. PS contributed to the conception of the study and study design, led the  
51 questionnaire design and survey implementation, including training of survey staff, monitoring  
52 survey progress and data collation and verification, commented on drafts of the report and helped  
53 prepare the references. AK undertook the data collation, verification and analysis, assisted with the  
54 survey and questionnaire design and survey implementation and prepared the tables for the report.  
55

1  
2  
3  
4  
5  
6  
7 AS led the literature review, assisted with the study and questionnaire design, survey  
8 implementation and preparation and analysis of baseline data, and commented on drafts of the  
9 report. MK helped with the data analysis. AW devised the methodology for the estimation of the  
10 programme impacts, advised during the data-collection and data-preparation stages, wrote and  
11 implemented the computer code for the model estimation, helped to oversee the production of the  
12 results, and contributed text to the report. GN provided technical advice on accounting for the  
13 complex survey structure in the analysis, developed a STATA equation, helped to compute an asset  
14 index, advised on the output tables, verified the analysis and commented on drafts of the report. AR  
15 helped develop a conceptual framework for the evaluation, advised on funding proposals, the study  
16 design, analytical methodology and presentation of results and contributed text to the report. MR  
17 wrote the first draft of the paper and its redrafts in accordance with the comments of all other  
18 authors and reviewers.  
19  
20  
21  
22  
23  
24  
25  
26  
27  
28  
29  
30  
31  
32  
33  
34  
35  
36  
37  
38  
39  
40  
41  
42  
43  
44  
45  
46  
47  
48  
49  
50  
51  
52  
53  
54  
55  
56  
57  
58  
59  
60



1  
2  
3  
4  
5  
6  
7 **ABSTRACT. WORD COUNT: 294298**

8 **OBJECTIVES**

9 To compare the effects of ~~health innovations~~ the Rajiv Aarogyasri Health Insurance Scheme of  
10 Andhra Pradesh (AP) with health financing innovations including the RSBY in Maharashtra (MH) over  
11 time on access to and out of pocket expenditure (OOPE) on hospital inpatient care in Andhra  
12 Pradesh (AP) and Maharashtra (MH) states of India

14 **STUDY DESIGN**

15 A cross-sectional difference in difference (DID) study with parallel control.

17 **SETTING**

18 National Sample Survey Organisation of India (NSSO) urban and rural 'first stratum units', 863 in AP  
19 and 1008 in MH.

21 **METHODS**

22 We used two cross-sectional surveys: as a baseline, the data for Maharashtra and Andhra Pradesh  
23 Two data sets were used. The from the NSSO 2004 survey data collected before the Aarogyasri and  
24 RSBY schemes were launched and as post-intervention, served as the baseline and a cross-sectional  
25 survey in the two states using the same NSSO methodology as NSSO survey survey we conducted in  
26 2012, using NSSO methodology provided post-intervention information.

28 **PARTICIPANTS**

29 8623 households in AP and 10073 in MH

31 **MAIN OUTCOME MEASURES**

32 Average OOPE, large OOPE and large borrowing per household per year for inpatient care,  
33 hospitalisation rate per 1000 population per year.

34 **RESULTS**

35 Average expenditure, large expenditures and large borrowings on inpatient care had increased in  
36 both MH and AP, but the increase was smaller in AP across these 3 outcome measures. DIDs for  
37 average expenditure and large borrowings were significant and in favour of AP for the rural and the  
38 poorest households. Hospitalisation rates also increased in both states but more so in AP (5.6 per  
39 1000 population vs 2.2), although the DID was not significant and the sub group analysis presented a  
40 mixed picture.

41 **CONCLUSIONS**

42 Health innovations in Andhra Pradesh had a greater beneficial effect on hospital inpatient care-  
43 related expenditures than innovations in Maharashtra. The Rajiv-Aarogyasri Community Health  
44 Insurance scheme is likely to have contributed to these impacts in Andhra Pradesh at least in part.  
45 However, out of pocket expenditure increased in both states over time. Schemes such as the  
46 Aarogyasri and RSBY may result in some positive outcomes but, equity of access to health care and  
47 the reduction of the overall burden of out of pocket expenditure especially in the most vulnerable  
48 sections of the population are likely to require additional interventions may be required, to improve  
49 access to care for the most vulnerable sections of the population that address gaps in the availability  
50 of and access to care.



**ARTICLE SUMMARY****STRENGTHS AND LIMITATIONS OF THE STUDY**

- This study uses a quasi-experimental design to compare changes between the Indian states of Andhra Pradesh and Maharashtra, in hospital inpatient care related expenditures and behaviours before and after the rollout of the Aarogyasri and RSBY schemes
- The study based on a survey of 18696 households has shown that health innovations in Andhra Pradesh had a greater beneficial effect on hospital inpatient care-related expenditures and access than innovations in Maharashtra. The Aarogyasri scheme is likely to have contributed to these impacts in Andhra Pradesh.
- The study also highlights the implications of the findings for policy and practice and additional interventions necessary to address gaps in the availability of and access to care.
- The study is only able to compare the effects of health innovations over time across the 2 states but does not allow the drawing of inferences on the impacts of individual initiatives.
- The study uses the difference in difference methodology and its findings may have been affected by unobservable differential changes between the 2 states.

**ACKNOWLEDGEMENTS:**

The study was funded by International Development and Research Centre, Canada, Wellcome Trust, the UK Department for International Development, and Rockefeller Foundation. The World Bank supported Adam Wagstaff's contribution to the study. We gratefully acknowledge the financial support of these organisations, as well as the enthusiastic encouragement we have received from them throughout the study. Our thanks also go to Bhimasankaram Pochiraju, Sundaresh Peri, C Ravi, and Rahul Ahluwalia for their advice and guidance at various stages of the study design and data analysis, and to colleagues at the University of East London and Administrative Staff College of India Hyderabad for their administrative support. The authors also thank P Suryanarayana, CM Reddy, D Chakrapani and K Pandu Ranga Reddy and AY Jadhav and his colleagues for their contribution to the training of the survey teams, verification of the survey and data collection and acknowledge the IMRB International Social Research Institute team's support in carrying out the survey.

We are grateful to Somil Nagpal and Joseph Kutzin for commenting on the report and helping us to improve it, to Sujatha Rao for her encouragement and valuable suggestions and ideas throughout the course of the study and to Jay Bagaria for her help during the early stage of the development of the proposal. Finally we thank PV Ramesh without whose constant support, guidance and encouragement, this study would not have been possible.

## INTRODUCTION

In 2005, member states of the World Health Organization (WHO) committed to develop their health financing systems to deliver universal coverage (UC); that is that all people have access to health services and do not suffer financial hardship paying for them<sup>1</sup>. WHO's 2010 World Health Report<sup>2</sup> recommended *inter alia* that countries reduce reliance on direct payments, and improve equity of access, including through the introduction of prepayment schemes. However, one recent systematic review of the impact of national health insurance schemes in low and middle income countries<sup>3</sup> found only weak evidence of increased use of healthcare and reduced out-of-pocket expenses, with the poorer benefitting less, whilst others<sup>4,5</sup> concluded that health insurance improved health care access and use, as well as financial protection in most cases but had no conclusive impact on health status. Both highlighted the need for more rigorous assessments of such schemes.

India has one of the highest levels of out-of-pocket health expenditure (more than 80% of private health expenditure)<sup>6</sup>. The aim of our study was to explore how recently introduced health financing initiatives have affected access to and out-of-pocket expenditure (OOPE) on inpatient hospital care in the Indian states of Andhra Pradesh (AP) and Maharashtra (MH).

## BACKGROUND

In its *Eleventh Five Year Plan (2007-12)*<sup>7</sup>, Government of India sought to increase Public Expenditure on Health and to strengthen investment in rural health infrastructure through the National Rural Health Mission. Its *Twelfth Five Year Plan (2012-17)*<sup>8</sup>, reflected the recommendation of the Planning Commission's High Level Expert Group for general taxation to be the principal source of health care financing. It proposed the development of government-funded health insurance schemes, building on the evidence from experimental schemes being introduced across many States. In India, health is primarily a state rather than national responsibility<sup>6</sup>. Whilst it is recognised that political will and good governance are essential, both the political mobilization of funds for health schemes and the effectiveness and efficiency of funded schemes will be enhanced by robust evidence which documents as to whether schemes achieve objectives, what works well and the main challenges they face.

In India, evaluation is not routine, even of large costly public health care programmes. Nevertheless, some assessments have been carried out, for example of the Yeshasvini Co-operative Farmers Health Care Scheme of Karnataka, the longest running state-supported health insurance scheme for the informal sector in India<sup>9</sup>, with promising results in terms of increased utilization of and reduced borrowing for health care services<sup>10</sup>. However, these early models covered small populations and offered limited benefits, so that the policy implications of conclusions drawn from even the best evaluations were unclear.

This scenario has changed during the past 5 years, with the launch of 2 schemes, the Rajiv Aarogyasri<sup>11</sup> Community Health Insurance Scheme (Aarogyasri) of Andhra Pradesh (AP) and Rashtriya Swasthya Bima Yojana (RSBY) currently offered in 30 states and union territories of India<sup>12</sup> including AP's neighbouring state of Maharashtra (MH). Their scale in terms of population coverage and range of treatments offered, significantly enhances their potential to inform India's road map towards universal health coverage. Both schemes belong to the new generation of publicly funded government-sponsored health insurance schemes, principally aimed at providing financial protection to the poor against catastrophic health shocks, which, for these schemes, the Government has defined as inpatient hospital care<sup>9</sup>. Both schemes have been subject to some assessment in their early phases, but a recent editorial<sup>13</sup> highlighted the necessity of further and repeated evaluations to enhance the credibility and accountability of existing schemes and to identify those which deserve scale-up. The Aarogyasri and RSBY schemes and the other recent health sector innovations in AP and

1  
2  
3  
4  
5  
6  
7 Maharashtra which form the major backdrop and complex health care architecture against which  
8 these have been launched, and which may have contributed to the changes in outcomes we have  
9 explored in our study, are described below.

#### 10 *The Rajiv Aarogyasri Health Insurance Scheme of AP*

11 In 2007 AP launched a pioneering new state-wide fully state-funded health insurance scheme, the  
12 Rajiv Aarogyasri Community Health Insurance Scheme (Aarogyasri)<sup>11</sup> to provide treatment for  
13 serious and life-threatening illnesses. The specific objectives include: to improve access of poor  
14 families to quality 'tertiary' medical care (meaning low-frequency, high cost specialist care) and  
15 treatment of identified diseases requiring hospitalisation through an identified network of health  
16 care providers, to provide financial cover for catastrophic illnesses which have the potential to wipe  
17 out life time savings of poor families and to provide 'universal coverage to the urban and the rural  
18 poor in the state'<sup>14</sup> albeit for the conditions covered in the benefits package. All families with a  
19 'below poverty line' (BPL) ration card, i.e. those on an annual income below USD 1384 (INR 75,000)  
20 in urban areas and USD 1107 (INR 60,000) in rural areas, and including individuals with pre-existing  
21 medical conditions are *automatically* enrolled and the scheme was estimated to cover  
22 approximately 20.4 million poor and lower middle class families, comprising about 85 percent of the  
23 state's population in 2009<sup>9</sup>. Enrollees make no contribution, the annual benefit is a maximum of USD  
24 4,500 (INR 200,000) per family per year and there is no limit on the size of the family<sup>14</sup>. A total of 942  
25 medical and surgical procedures across 31 clinical specialties<sup>14</sup> are provided and the benefits include  
26 all inpatient costs - associated investigations, food, transport and medicines for 10 days following  
27 discharge. One year follow-up packages including consultation, medicines, and diagnostics are also  
28 available for 125 procedures requiring longer periods of follow up<sup>9</sup>. Aarogyasri has unique features  
29 including *Aarogyamithras* (health system navigators), outreach *health camps* delivered by  
30 participating hospitals to educate, screen and case-find and a state-of-the-art information  
31 technology-based management system. At the time of this study, 353 public and private sector  
32 hospitals were 'empanelled' to provide services to Aarogyasri beneficiaries.

33 In 2009, a descriptive study of *Aarogyasri*, based on an analysis of claims data and a survey of  
34 beneficiaries<sup>15</sup>, concluded that while the scheme was beginning to reach its intended beneficiaries  
35 uptake was lower among scheduled castes and tribes. This was confirmed by Fan and colleagues<sup>16</sup>,  
36 who used variations in programme roll-out over time and districts to evaluate the scheme using  
37 National Sample Survey data collected before and after its launch. They reported reduced out-of-  
38 pocket expenditure in this initial phase but no major impact on catastrophic healthcare expenditure.  
39 Inspired by Aarogyasri and mindful of the political benefits of introducing popular health reforms,  
40 other states have launched health financing innovations similar to this model.

#### 41 *RSBY in Maharashtra*

42 RSBY was launched across a number of states by the Ministry of Labour, Government of India (GOI)  
43 in 2008<sup>17</sup> and provides access to free inpatient hospital care up to USD 550 (INR 30,000) per family  
44 per year<sup>18</sup>. Households which meet the criteria based on the much more limiting definition of  
45 poverty and numbers of poor families provided for each State by the GOI Planning Commission are  
46 eligible to enrol, and pay a contribution of USD 0.55 (INR 30) at registration and at each annual  
47 renewal<sup>9</sup>. Up to 5 family members, including those with pre-existing conditions can be covered, and  
48 personal information including biometric data are collected prior to the issue of a smart card with  
49 encoded details of the family. 700 procedures covering 18 broad categories of interventions which  
50 would generally be included under the umbrella of 'secondary' care, are provided and the benefit  
51 packages include the intervention, public transport costs limited to 1.8 USD (INR 100) per visit and  
52 18.2 USD (INR 1000) per year and post-hospitalization drugs for 5 days. Networked hospitals are  
53 required to provide free outpatient consultations (which have only recently been introduced.  
54 Personal communication, Kurian OC) but other costs such as ambulatory diagnostics and medicines

1  
2  
3  
4  
5  
6  
7 have to be borne by the beneficiaries, except if investigations lead to inpatient admissions within a  
8 day<sup>9</sup>. A pilot of the RSBY scheme was launched in 1 district of AP, but only after the start of our  
9 household survey.

10  
11 In Maharashtra, enrolment began in Aug 2009, and by mid 2013, approximately 2 million of the  
12 eligible 4 million families were enrolled in the scheme<sup>12</sup> which is being implemented in 31 of 35  
13 districts in the state. Enrolment had extended to 26 districts prior to June 2012, when our household  
14 survey began. Notably, only 15 out of 1215 hospitals contracted for RSBY funded services are from  
15 the public sector<sup>12</sup>. Early assessments of the scheme's impact nationally, suggest that although the  
16 rate of hospitalisations has increased, awareness of the scheme was poor and remains a barrier to  
17 uptake. Notable variations in enrolment and scheme awareness were also observed by a descriptive  
18 study of RSBY conducted in the Amravati district of Maharashtra which has a large tribal  
19 population<sup>19</sup>. In Maharashtra<sup>17</sup>, utilisation rates have been reported to be lower than in other states  
20 and the male:female enrolment ratio is 6.5:3.5.

#### 21 *Other major health sector initiatives in AP and Maharashtra*

22 Both states have a complex health care landscape with numerous programmes in place. There are  
23 several initiatives launched during the past decade, some of which are common to both states and  
24 driven by national strategies, and others owe their existence to state-level enterprise, innovation  
25 and political support. The most notable programmes with the potential to impact on in patient care  
26 are described below.

27 The National Rural Health Mission (NRHM) was launched in 2005 nationwide, with a key aim of  
28 reducing maternal and infant mortality<sup>20</sup>. Government reports suggest that its notable achievements  
29 include an increase in institutional deliveries; in AP from 1.25 million in 2005-06 to 1.46 million by  
30 2011-12<sup>21</sup> and in MH from 1.1 million to 1.63 million<sup>22</sup>, achieving an institutional delivery rate of  
31 approximately 92 percent in both states. Also common to both states is the '104 health information  
32 help line' launched in AP in 2008 and MH in 2011<sup>23</sup>, to provide medical advice and information based  
33 on validated algorithms and disease summaries, direct callers to appropriate health facilities or to  
34 receive a complaint against a public sector health facility. In AP the help line and call centre were  
35 subsumed within the Aarogyasri infrastructure by 2011.

36 In MH, the RSBY was preceded by the Jeevandayee scheme launched in 1997 with the objective of  
37 reducing catastrophic OOPe on inpatient care in the BPL population<sup>24</sup>. Potential beneficiaries were  
38 required to apply for funding after a diagnosis was confirmed and the scheme covered serious illness  
39 such as cardiac and renal disease and cancer. However, the scheme uptake has been low, and while  
40 it has continued to run in parallel to the RSBY, only 66,853 procedures (4456 procedures per year in  
41 a state with 112.37 million people) have been approved during the scheme's lifetime<sup>25</sup>. Since 2006,  
42 MH has also had a scheme in place which mandated 20% of the beds in private hospitals to be made  
43 available for free or at subsidized rates to poor patients (personal communication, Kurian OC). It has  
44 been estimated that around 10,000 private beds are available for the poor across MH, equivalent to  
45 approximately 20% of the total bed capacity of the public sector. Although the implementation of  
46 the scheme is reported to be erratic (Kurian OC), it may have had some positive impact on access to  
47 hospital inpatient care for serious illness.

48 Launched in 1995-96, the Navasanjeevani Yojana scheme is exclusive to the 15 tribal districts of MH  
49 and was to improve maternal and infant mortality in these vulnerable populations<sup>26</sup>. It has focused  
50 on strengthening primary health and nutrition services and access to safe drinking water.

51 A service available in AP but not in MH is the '108' scheme, launched in 2005 to provide a state-of-  
52 the-art medical emergency response service<sup>27</sup>. At the time of our study, 802 ambulances catered to  
53 approximately 3,500 emergencies per day<sup>28</sup>.

## OBJECTIVES OF THE STUDY

Our objective was to compare the effects of health innovations over time on access to and OOPE on inpatient care in AP and MH and to assess whether the AP initiatives had larger or smaller beneficial effects than those found in MH. These differential effects are likely to be substantially due to the Aarogyasri scheme in AP and the RSBY in MH. In this paper, we report findings from a study which compared these trends. The findings do not allow us to draw inferences on the impacts of individual initiatives, but nevertheless contribute new knowledge on the impact and role of the innovations, provide lessons for other programmes, and strengthen the evidence base for policy on UC in India.

## METHODS

### Overview

None of the aforementioned initiatives – including the Aarogyasri and RSBY schemes in which we are especially interested – was piloted in a systematic way, let alone via a carefully designed randomized control trial. Following MRC Guidance<sup>29,30</sup> and best practice we therefore opted for a quasi experimental design in which we seek to minimise selection bias, to control for confounding variables and to reduce the effects of chance. Specifically, we compare changes in hospital inpatient care related expenditures and behaviours (HREB) in AP and MH before and after the rollout of the Aarogyasri scheme in AP and the RSBY scheme in MH. The difference in changes between AP and MH is not an estimate of a specific initiative. Rather it tells us whether, on balance, the AP initiatives have had larger (or smaller) beneficial effects than the MH initiatives, and if so how much more (or less) beneficial they have been. Since the NRHM was common to both states and the MH-specific initiatives were quite small in scale or unlikely to affect HREBs, any difference in change between the two states is quite likely to be mainly due to differential effects of the Aarogyasri and RSBY programmes.

AP and MH have a **broadly** similar development profile **as shown by the data below**(Figure 1). AP's other socio-economically similar neighbouring states of Karnataka and Tamil Nadu had already introduced Aarogyasri-like schemes, and Odisha and Chattisgarh the only other neighbours, had comparatively higher levels of socio-economic deprivation. HREBs were measured in both AP and MH by two waves of household survey before (2004) and after (2012) the introduction of Aarogyasri and RSBY. The study protocol and questionnaire for the 2012 survey were reviewed and agreed by the Research Ethics Committee of the Administrative Staff College of India, Hyderabad.

**Figure 1. Location of and selected indicators for Andhra Pradesh and Maharashtra**

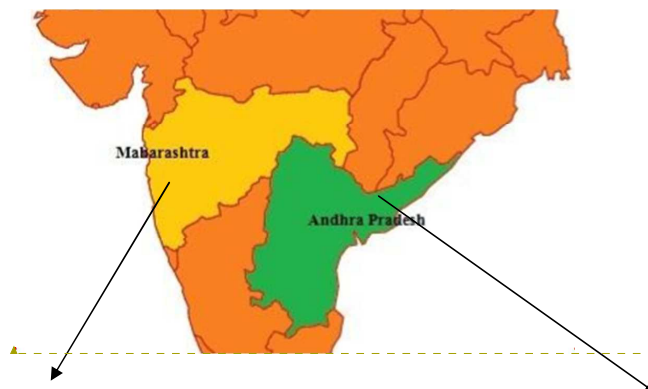

10

Formatted: Font: Bold

| Maharashtra | Indicator                                                   | Andhra Pradesh |
|-------------|-------------------------------------------------------------|----------------|
| 112.37      | Population (2011 census, in millions)                       | 84.66          |
| 10.20       | % Schedule Caste ( 2001 Census)*                            | 16.60          |
| 8.90        | % Schedule tribe ( 2001 census)*                            | 6.20           |
| 101,314     | Per capita income 2011-12 (in INR)**                        | 71,540         |
| 35          | Number of districts                                         | 23             |
| 5,314       | Households covered in NSSO 60 <sup>th</sup> round (2004-05) | 5,059          |
| 10,073      | Households covered in the study 2012                        | 8,623          |

\*Note that 2011 census data for social groups are not yet published

\*\*Source: Presentation on Annual Plan 2012-13 and Five Year Plan 2012-17<sup>31</sup>

#### Survey design

##### Baseline Survey : 2004

We used the original data from the National Sample Survey Organization (NSSO) 60<sup>th</sup> decennial round household survey undertaken in 2004<sup>32</sup> to estimate baseline HREB estimates for AP and MH (Table 1). This was the most recent round measuring morbidity profiles, use of health care services including hospitalised and non-hospitalised treatments and expenditures incurred. The household survey used a multi-stage stratified sampling methodology to identify a representative random population sample and an interviewer completed questionnaire to obtain measures of HREB along with socio-demographic, household expenditure and other information. (see Online Appendix for full technical details of sampling method and full questionnaire).

##### Follow up survey: 2012

We used the same household survey design and methods to collect post-intervention data in AP and MH as those used by NSSO. Briefly, the household survey used a multi-stage stratified sampling methodology with the 'First Stage Units' (FSUs) identical to those used by NSSO in their 66<sup>th</sup> round (2008-09)<sup>33</sup>, the latest round for which FSUs had been mapped. However, the FSUs were not the same as those in NSSO 2004, our baseline survey, rapid urbanisation having changed substantially, the urban-rural landscape of both states and thus the geographical basis for sampling units.

**Table 1: Urban and rural populations and households surveyed in 2004 and 2012 in Andhra Pradesh and Maharashtra**

|                          | Andhra Pradesh          |                 | Maharashtra             |                 |
|--------------------------|-------------------------|-----------------|-------------------------|-----------------|
|                          | NSSO 60th round 2004-05 | Our survey 2012 | NSSO 60th round 2004-05 | Our survey 2012 |
| Population               | 76,210,007*             | 84,665,533**    | 96,878,627*             | 112,372,972**   |
| Urban population         | 20,808,940*             | 28,353,745**    | 41,100,980*             | 50,827,531**    |
| Rural population         | 55,401,067*             | 56,311,788 **   | 55,777,647*             | 61,545,441**    |
| Total households (urban) | 4,397,138*              | 6,778,225**     | 8,403,224*              | 10,813,928**    |
| Total households (rural) | 12,607,167*             | 14,246,309**    | 11,173,512*             | 13,016,652**    |
| Total households         | 17,004,305*             | 21,024,534**    | 19,576,736*             | 23,830,580**    |
| FSUs (urban)             | 183                     | 372             | 267                     | 504             |
| FSU (rural)              | 325                     | 491             | 265                     | 504             |
| Total households         | 1824                    | 3715            | 2664                    | 5038            |



|                                  |      |      |      |      |
|----------------------------------|------|------|------|------|
| surveyed (urban)                 |      |      |      |      |
| Total households covered (rural) | 3235 | 4908 | 2650 | 5035 |

\*2001 census \*\* 2011 census

FSU - First Stratum Unit

The NSSO 66th round had 492 rural FSUs in AP, but 1 FSU was found to be uninhabited.

The interviewer completed household survey questionnaire was pre-tested and then piloted in both states prior to the survey. All respondents provided written informed consent for participation. Questions addressed the following: household composition and socio-demographic characteristics of members, household expenditure, and health expenditure (outpatient and inpatient) and means of its financing, healthcare seeking behaviour, factors affecting access to healthcare and awareness and perceptions of the quality of the *Aarogyasri* scheme (AP only). The survey questions in 2012 were identical to those from the NSSO 2004<sup>34</sup>. Additional questions specific to the *Aarogyasri* and other relevant schemes were also added.

A survey of 18696 households across 2 states and 1871 locations within the states is a challenging undertaking. The survey design had several features intended to assure the quality of data collected. Few academic institutions have internal capacity to carry out such large surveys, and consequently, the Social and Research Institute of IMRB International, a leading market research agency was selected to carry out the survey. The Institute has field survey teams based in every Indian state, conversant in local languages and dialects and trained to carry out surveys in the socio-economic development sector. Its clients include Government of India (for whom the national Family Health Survey data are collected), World Bank and other UN organisations. A group of NSSO consultants in AP and the Indian Socioeconomic Research Unit, Pune were recruited to support the training of the field survey teams and data verification.

We planned three levels of verification of the study data; the first to be undertaken by the survey agency, the second to be carried out by the study team and the third, by the agencies mentioned above. Survey teams for each district were accountable to a field supervisor who was responsible for checking both the household listing and data entry on a daily basis. The study team also accompanied the field staff to survey sites on a regular basis. Data collected from 250 households in each state (approximately 2.5% of the surveyed households) and 186 of the FSU listings (approximately 10%) were independently verified by the agencies in both the villages and urban blocks in order to ensure that the sampling method and administration of the questionnaire survey were being correctly applied. The data entry was carried out by the Institute using a double entry method and any questionnaires reported incorrect were sent back to the field for re-survey. The research team carried out a final validation and review of the data.

#### *Outcome measures*

*Average inpatient (IP) expenditure per household per year.* Average out-of-pocket expenditure for inpatient care during 1 year prior to the survey was estimated from questionnaire responses for AP



and MH from both baseline and follow-up data. Reimbursements for inpatient expenditure were deducted from the total where households had received them.

*Large out-of-pocket inpatient expenditure.* Because of the limited data on household consumption in the 2004 NSSO health survey we did not estimate 'catastrophic health expenditure'. Instead, we constructed a measure of 'large' out-of-pocket expenditure. The Aarogyasri Health Care Trust data on expenditure incurred by the Government of AP per case in 2012 were examined<sup>14</sup> and the mean was estimated as USD 419 (INR 23,000). A household was deemed to have incurred 'large' expenditure if OOPE for inpatient care was equal to or greater than this threshold.

*Large borrowing.* We estimated the total amount borrowed by a household to meet the expenditure of all the inpatient episodes of that family during the previous year. A household was considered to have incurred 'large borrowing' if the borrowing was equal to or exceeded the BPL threshold set by Government of AP: INR 70000 for urban families and INR 65000 for rural households. These prices have been deflated to 2004 levels.

*Hospitalisation rate.* This was estimated as the number of individuals hospitalised during the previous year, per 1000 population.

Variations in outcomes were examined between male and female-headed households, and rural and urban populations, as well as across social groups and economic groups represented by asset quintiles.

Because of the limited data on household consumption in the 2004 NSSO health survey which made the estimation of wealth difficult, we have opted instead to measure household living standards using an asset or wealth index based on information on ownership of household durables, dwelling type, etc., using principal component analysis to estimate weights<sup>35, 36, 37</sup> for each indicator. The indicators used were limited to those collected in the 2004 NSSO: type of structure of the dwelling unit, type of toilet, type of fuel used for cooking and source of drinking. Data from the 2004 and 2012 surveys were pooled so that the index captures changes in living standards between the two years; there are therefore more households in the top quintile in 2012 than in 2004. The statistical software Stata 11 was used to generate the index.

*Deflation of follow-up expenditure estimates.*

The 2012 expenditure data including the threshold for large expenditures were deflated using the consumer price index of the Government of India<sup>38</sup> to reflect 2004 prices.

*Analysis*

Our repeat cross-sectional surveys do not allow estimation of within-individual household changes in outcomes over time. Our analysis therefore focused on estimating outcomes averaged across states, and in comparing changes in these over time between AP and MH. If we assume that outcome determinants other than Aarogyasri and RSBY remained stable in the two states over time or followed a parallel trend, then a difference-in-difference (DID) analysis will uncover the net effect of Aarogyasri over and above RSBY.

The difference in differences of outcome ( $Y_{DD}$ ) is

$$(Y_{2012}^{AP} - Y_{2004}^{AP}) - (Y_{2012}^{MH} - Y_{2004}^{MH})$$

where the subscripts and superscripts for Y refer to the respective states and the years when the surveys were done. Confidence intervals were calculated from the standard error  $Y_{DD}$  of and the p-

value for the null-hypothesis ( $Y_{DD} = 0$ ) was tested using the Wald test as  $t = \frac{Y_{DD}}{SE_{Y_{DD}}}$  with one degree of freedom.  $Y_{DD}$  was estimated using ordinary least square regression:

$$y_{it} = \beta_0 + \beta_1 state_i + \beta_2 survey_t + \beta_3 (state * survey)_{it} + \sum_{k=1}^m \beta_{3+k} covariate_k + \varepsilon$$

The basic DID results are obtained using the above regression with covariates excluded. The adjusted DID results are obtained using the above regression with  $m=9$  covariates, namely the gender of head of household, a dummy variable capturing whether the household lives in a rural or urban location, three dummy variables capturing the household's social group (the lowest is the excluded category), and four asset quintile dummies (the bottom is the excluded category). In the regression  $y_{it}$  is the outcome,  $state$  is a dummy variable with 0 for MH and 1 for AP, and  $survey$  is a dummy variable with 0 for 2004 survey and 1 for 2012 survey. The coefficient for the interaction term,  $\beta_3$ , gives the differences in differences estimate,  $Y_{DD}$ . Robust standard errors of  $Y_{DD}$  were calculated to account for clustering of households within FSUs using Stata survey commands. A positive value for  $Y_{DD}$  suggested that the change in the outcome in AP was more than the change in MH and the negative value would suggest the reverse.

[An advantage of regression based DID estimate is this ability to use co-variates which can account for differential trajectories in the two states. In addition to this we did sub-group analysis stratifying for different co-variates. This is particularly relevant in the case of Scheduled tribes whose proportion increased in MH in the follow up survey.](#)

Sub groups were not mutually adjusted for the analysis due to sample size restrictions in relation to some of them.

#### *Role of the funding sources*

The external funding sources had no role in study design, data collection, analysis, interpretation or reporting, or in submission decision.

## RESULTS

A total of 5314 and 5059 households from Maharashtra and AP were surveyed by the NSSO in 2004 (Table 2). Our survey in 2012 included 10073 (MH) and 8623 (AP) households.

**Table 2. Socio-demographic characteristics of baseline and follow-up samples**

| Subgroups | Number (%) of Households 2004 | Number (%) of Households 2012 |
|-----------|-------------------------------|-------------------------------|
|-----------|-------------------------------|-------------------------------|

|                          | Maharashtra  | Andhra Pradesh | Maharashtra  | Andhra Pradesh |
|--------------------------|--------------|----------------|--------------|----------------|
| <b>All</b>               | 5314         | 5059           | 10073        | 8623           |
| <b>Head of Household</b> |              |                |              |                |
| Male                     | 4785 (90.0)  | 4433(87.6)     | 8543(84.8)   | 7418(86.0)     |
| Female                   | 529 (10.0)   | 626 (12.4)     | 1530 (15.2)  | 1205 (14.0)    |
| <b>Social Group</b>      |              |                |              |                |
| Scheduled Tribes         | 413 (7.8)    | 296 (5.9)      | 1364 (13.5)  | 883 (10.2)     |
| Scheduled Castes         | 809 (15.2)   | 974 (19.3)     | 2235 (22.2)  | 1797 (20.8)    |
| Other Excluded           | 1644 (30.9)  | 2317 (45.8)    | 1899 (18.9)  | 3419 (39.7)    |
| All other Groups         | 2448 (46.1)  | 1472 (29.1)    | 4571 (45.4)  | 2524(29.3)     |
| <b>Location</b>          |              |                |              |                |
| Rural                    | 2,650 (49.9) | 3235 (63.9)    | 5035(50.0)   | 4908 (57.0)    |
| Urban                    | 2664 (50.1)  | 1824 (36.1)    | 5038 (50.0)  | 3715(43.0)     |
| <b>Asset Quintile</b>    |              |                |              |                |
| Lowest                   | 1,260 (23.7) | 1,594(31.5)    | 996(9.9)     | 826(9.6)       |
| Second                   | 1,016 (19.1) | 1,237 (24.5)   | 1,841(18.2)  | 1,286(14.9)    |
| Third                    | 772 (14.5)   | 753(14.9)      | 2,228(22.1)  | 2,121(24.60)   |
| Fourth                   | 857 (16.1)   | 744(14.7)      | 2,373 (23.6) | 3,072(35.6)    |
| Fifth                    | 1,408(26.5)  | 730(14.4)      | 2,633(26.1)  | 1,318(15.3)    |

### Changes in average in-patient expenditure

Table 3 (top panel) shows average baseline levels of inpatient expenditure. The table also shows the real terms change (deflated to 2004 prices) in these outcomes at follow up and the difference in difference (DID) estimate comparing AP with MH. DIDs for overall results are shown unadjusted, as well as adjusted for the effects of the covariates. Breakdowns by sex of head of household, social group, urban/rural location and asset quintiles are also shown.

Overall, average inpatient expenditure increased in real terms in both the states between 2004 and 2012, but the increase was significantly greater in MH (unadjusted DID= -498.2 INR, 95% CI= -792.9: -203.5, p=0.0009). The trend of a greater increase in MH was evident across all sub groups of analysis except the richest asset quintile. However, the DIDs reached significance in male headed households (DID=-513.7INR, 95% CI= -843.9: -183.4, p=0.0023), scheduled castes (DID= -708.7INR , 95% CI=-1234.3: -183.2, p=0.0082), all 'other' social groups (DID=-1110.46INR, 95% CI=-1868 : -352.9, p=0.0041), rural households (DID= -504 INR, 95% CI= -801.9: -206.0, p=0.0009) and the poorest (DID= -1001.3 INR, 95% CI= -1751: -251.7, p= 0.0089) and middle asset quintiles (DID= -798.1 INR, 95% CI= -1362.9:-233.3, p= 0.0056).

**Table 3: Change in average inpatient expenditure (in INR) in Maharashtra and Andhra Pradesh between 2004 and 2012**

1  
2  
3  
4  
5  
6

| Subgroups                              | Baseline Mean (95% CI)  |                      | Change 2004:2012 Mean (95% CI) |                        | DID                                  |        |
|----------------------------------------|-------------------------|----------------------|--------------------------------|------------------------|--------------------------------------|--------|
|                                        | Maharashtra             | Andhra Pradesh       | Maharashtra                    | Andhra Pradesh         | Mean (95%CI)                         | p      |
| <b>Household inpatient expenditure</b> |                         |                      |                                |                        |                                      |        |
| All                                    | 1091.6(978.4:1204.8)    | 723.5(527.5:919.5)   | 942.8(749.9:1135.6)            | 444.55(221.5: 667.6)   | -498.2(-792.9:-203.5)                | 0.0009 |
|                                        |                         |                      |                                |                        | <b>DID (adjusted for covariates)</b> |        |
|                                        |                         |                      |                                |                        | -565.8(862.9:-268.6)                 | 0.0002 |
| Head of household                      |                         |                      |                                |                        |                                      |        |
| Male                                   | 1,132.9(1015:1,251)     | 758(419.7:1,096.3)   | 935(727:1,143.01)              | 1074.9(555.9:1593.8)   | -513.7(-843.9:-183.4)                | 0.0023 |
| Female                                 | 757.1(555.5:1014.6)     | 341.1(222.3:460.01)  | 421.3(164.7:678.0)             | 589.9(307.22:872.8)    | -484.9(-1075.6:105.9)                | 0.1076 |
| Social Group                           |                         |                      |                                |                        |                                      |        |
| Scheduled Tribes                       | 376.6(231.7:521.6)      | 432.7(212.52:652.9)  | 1153.1(803.3:1502.9)           | 675.2(163.2:1187.2)    | -477.9(-1097.7:142)                  | 0.1307 |
| Scheduled Castes                       | 696.7(500.2:893.2)      | 432.6(305.6:559.4)   | 1464.1(1039.9:1888.4)          | 755.4(444.9:1065.9)    | -708.7(-1234.3:-183.2)               | 0.0082 |
| Other scheduled                        | 1,028.6(838.4:1218.8)   | 562.4(463.7:662)     | 928.9(532.9:1324.9)            | 767.9(569.6:966.2)     | -161(-603.7:281.7)                   | 0.4758 |
| All other Groups                       | 1,424.5(1,222.3:1626.7) | 1306.2(627.8:1984.6) | 734.9(427.9:1041.7)            | -375.6(-1,068.5:317.4) | -1110.46(-1868:-352.9)               | 0.0041 |
| Location                               |                         |                      |                                |                        |                                      |        |
| Rural                                  | 897.8(768.1:1027.5)     | 571.4(496.2:646.6)   | 1084.7(826.3:1343.1)           | 580.7(432.2:729.2)     | -504(-801.9:-206.0)                  | 0.0009 |
| Urban                                  | 1343.5(1146.1:1540.9)   | 1113.5(466.2:1760.8) | 753.6(458.7:1048.6)            | 92.3(-586.92:771.5)    | -661.3(-1401.5:78.864)               | 0.0799 |
| Quintile                               |                         |                      |                                |                        |                                      |        |
| Poorest                                | 656.3(498.0:814.6)      | 391.5(319:464.1)     | 1692.5(1053.3:2331.7)          | 691.2(298.9:1083.5)    | -1001.3(-1751:-251.7)                | 0.0089 |
| 2nd                                    | 786.5(583.5:989.5)      | 443.3(356.5:530.2)   | 979.3(599.4:1359.2)            | 839.5(465.7:1213.3)    | -139.8(-672.5:393)                   | 0.607  |
| Middle                                 | 1062.7(738.8:1386.1)    | 862.1(577.8:1146.5)  | 1011.8(550.2:1473.4)           | 213.7(-112.1:539.6)    | -798.1(-1362.9:-233.3)               | 0.0056 |
| 4th                                    | 1241.7(894.4:1589.1)    | 1819(337.5:3302.5)   | 803.6(328.7:1278.5)            | -644.3(-2128.3:839.7)  | -1447.9(-3005.2:109.5)               | 0.0684 |
| Richest                                | 1818.6(1505.5:2131.8)   | 908.3(682.1:1133.4)  | 252.3(-193.4:698.1)            | 362.1(15.3:708.9)      | 109.7(-454.80:674.3)                 | 0.7031 |

52  
53  
54  
55  
56  
57  
58  
59  
60**Large expenditures for inpatient care**

Proportions of households incurring large expenditures showed an increase in both states (Table 4), but the increase was smaller in AP for the sample as a whole as well as for all the groups except for the second asset quintile. The DID was strongly significant for the households overall (adjusted DID=-1.8, 95% CI: -3:-0.7, p= 0.0009), but this was not observed for any of the sub groups of analysis.

**Table 4: Change in the proportion (%) of households incurring large health expenditures for inpatient care in Maharashtra and AP between 2004 and 2012**

| Subgroups                                                        | Baseline Mean (95% CI) |                | Change 2004:2012 Mean (95% CI) |                   | DID                                  |        |
|------------------------------------------------------------------|------------------------|----------------|--------------------------------|-------------------|--------------------------------------|--------|
|                                                                  | Maharashtra            | Andhra Pradesh | Maharashtra                    | Andhra Pradesh    | Mean (95%CI)                         | p      |
| <b>Large IP expenditure (INR 23000 deflated to 2004 figures)</b> |                        |                |                                |                   |                                      |        |
| All                                                              | 6.7(6.7:3)             | 3.4(2.9:3.9)   | 3.1(2.1:4.1)                   | 2.2(1.5:2.8)      | -0.91(-2.1:0.27)                     | 0.1302 |
|                                                                  |                        |                |                                |                   | <b>DID (adjusted for covariates)</b> |        |
|                                                                  |                        |                |                                |                   | -1.8(-3:-0.7)                        | 0.0009 |
| <b>Head of Household</b>                                         |                        |                |                                |                   |                                      |        |
| Male                                                             | 6.8(6.2:7.6)           | 3.5(3.1:4)     | 3.1(2.0:4.1)                   | 2.1(1.5:2.9)      | -0.8(-2.1:-0.4)                      | 0.1928 |
| Female                                                           | 5.0(3.7:6.4)           | 2.8(1.9:3.7)   | 3.9(2:5.8)                     | 2(6.6:3.4)        | -1.8(-4.2:0.50)                      | 0.1222 |
| <b>Social Group</b>                                              |                        |                |                                |                   |                                      |        |
| Scheduled Tribes                                                 | 2.2(1.3:3.1)           | 1.4(0.5:2.2)   | 5.3(3.5:7)                     | 3.5(1.9:5.1)      | -1.7(-4.1:0.61)                      | 0.1478 |
| Scheduled Castes                                                 | 6.1(4.6:7.7)           | 2.1(1.5:2.6)   | 4.3(2.3:6.3)                   | 3(1.9:4.1)        | -1.2(-3.5 :1.01)                     | 0.2785 |
| Other Excluded                                                   | 5.9(4.7:7.0)           | 3.3(2.7:3.8)   | 2.9(1.1:4.6)                   | 2.7(1.7:3.6)      | -2.1(-2.2:1.8)                       | 0.8389 |
| All other Groups                                                 | 8.3(7.5:7.9)           | 5.4(4.4:6.3)   | 2.2( 0.9:3.6)                  | 0.51(-0.7:1.7)    | -1.7(-3.5:0.04)                      | 0.0628 |
| <b>Location</b>                                                  |                        |                |                                |                   |                                      |        |
| Rural                                                            | 1.9(1.5:2.2)           | 0.9(0.79:1.1)  | 1.7(1.1:2.3)                   | 1.3(0.09:1.6)     | -0.45(-1.1:0.25)                     | 0.2098 |
| Urban                                                            | 12.9(11.9:14)          | 9.7(8.9:10.7)  | 4.4(3.0:5.7)                   | 3.9(2.6:5.3)      | -0.7(-2.4: 1.5)                      | 0.6350 |
| <b>Quintile</b>                                                  |                        |                |                                |                   |                                      |        |
| poorest                                                          | 1.8(1.3:2.4)           | 1.1(0.8:1.4)   | 3.7(2.2:5.2)                   | 1.7(0.7:2.7)      | -0.2(-3.8:-0.19)                     | 0.0307 |
| 2nd                                                              | 2.7(1.9:3.5)           | 1.2(0.9:1.5)   | 2.1(0.93:3.3)                  | 2.2(1.4:3.1)      | 0.9(-1.4:1.6)                        | 0.9079 |
| middle                                                           | 6.9(4.9:8.9)           | 4.2(3.1:5.3)   | 1.3(-1:3.6)                    | 0.9(-1.2:1.4)     | -1.2(-3.9:1.4)                       | 0.3596 |
| 4th                                                              | 10.7(8.7:12.6)         | 7.6(5.9: 9.2)  | 1.8(-0.57:4.3)                 | -0.036(-1.9:1.80) | -1.9(-4.9:1.2)                       | 0.2268 |
| richest                                                          | 13.5(12:14.9)          | 9.6(8.1:11.2)  | 0.3(-1.6:2.2)                  | -0.6(-2.8:1.6)    | -0.9(-3.7:2)                         | 0.5601 |

#### Changes in large borrowing for inpatient care

In both states proportions of households incurring large borrowings to meet inpatient expenses increased from 2004 to 2012 (Table 5). However, there was a consistent pattern of smaller increases in AP for the overall population, as well as all subgroups (except the richest asset quintile) with DID's strongly significant for the overall population (adjusted DID=-4, 95% CI: -6.6:-1.4, p= 0.0032), scheduled tribes (DID= -5.5, 95% CIs:-9.3:-1, p= 0.0048), rural households (DID= -4.7, 95% CIs: -7.3 : -2.1, p= 0.0007) and all asset quintiles except the richest (the poorest asset quintile DID= -9.0, 95% CI: -14.0: -4.4, p=0.0002).

**Table 5: Change in the proportion (%) of households large borrowings for in-patient care in Maharashtra and AP between 2004 and 2012**

| Subgroups                                               | Baseline Mean (95% CI) |                    | Change 2004:2012 Mean (95% CI) |                     | DID                                  |        |
|---------------------------------------------------------|------------------------|--------------------|--------------------------------|---------------------|--------------------------------------|--------|
|                                                         | Maharashtra            | Andhra Pradesh     | Maharashtra                    | Andhra Pradesh      | Mean (95%CI)                         | p      |
| <b>Proportion of households having large borrowings</b> |                        |                    |                                |                     |                                      |        |
| All                                                     | 7.5(6.7:8.2)           | 3.8(3:4.5)         | 8.9(6.8:11)                    | 5.3(3.4:7.2)        | -3.7(-6.4:-0.908)                    | 0.0100 |
|                                                         |                        |                    |                                |                     | <b>DID (adjusted for covariates)</b> |        |
|                                                         |                        |                    |                                |                     | -4(-6.6:-1.4)                        | 0.0032 |
| <b>Head of Household</b>                                |                        |                    |                                |                     |                                      |        |
| Male                                                    | 7.8(7.0:8.5)           | 3.9(3.1:4.7)       | 9.8(6.6:1.3)                   | 5.3(3.3:7.3)        | -3.6(-6.6:-0.62)                     | 0.0187 |
| Female                                                  | 5(3:7)                 | 2.9(1.7:4.1)       | 8(6.6:11.2)                    | 5(2.9:7.23)         | -4.7(-8.3:-1)                        | 0.0137 |
| <b>Social Group</b>                                     |                        |                    |                                |                     |                                      |        |
| Scheduled Tribes                                        | 3.6(2.3:4.9)           | 2.4(0.93:3.9)      | 11(8.9:14)                     | 5.8(2.8:8.8)        | -5.5(-9.3:-1.8)                      | 0.0048 |
| Scheduled Castes                                        | 7.2(5.5:8.8)           | 3(1.7:4.2)         | 9.6(6.6:13)                    | 5.8(3.4:8.3)        | -3.8(-7.5:0.03)                      | 0.0518 |
| Other Excluded                                          | 8.0(6.8:9.2)           | 3.5(2.7:4.4)       | 8(5.8:10.3)                    | 5.3(3.2:7.4)        | -2.8(-5.7:0.19)                      | 0.0661 |
| All other Groups                                        | 8(7.15:8.8)            | 0.052(0.040:0.064) | 8.8(5.9:12)                    | 4.7(2.2:7.4)        | -4.1(-7.9:-4.0)                      | 0.0302 |
| <b>Location</b>                                         |                        |                    |                                |                     |                                      |        |
| Rural                                                   | 6.5(5.6:7.5)           | 0.03(0.024:0.038)  | 10(8.5:12)                     | 5.8(3.9:7.6)        | -4.7(-7.3:-2.1)                      | 0.0007 |
| Urban                                                   | 8.7(7.3:10)            | 0.056(0.048:0.064) | 7.0(4.5:9.5)                   | 4(1.1:6.9)          | -3.0(-6.7:0.68)                      | 0.1081 |
| <b>Quintile</b>                                         |                        |                    |                                |                     |                                      |        |
| poorest                                                 | 5.2(3.9:6.5)           | 0.025(0.016:0.033) | 12.1(7.8:16)                   | 3.1(1.3:0.049)      | -9(-14:-4.4)                         | 0.0002 |
| 2nd                                                     | 0.064(0.048:0.08)      | 0.027(0.021:0.032) | 0.095(0.070:0.12)              | 0.052(0.034:0.070)  | -0.043(-.073:-.013)                  | 0.0062 |
| middle                                                  | 0.074(0.050:0.098)     | 0.048(0.031:0.065) | 0.10(.073:0.133)               | 0.044(0.013:0.076)  | -0.059(-.100:-.017)                  | 0.0069 |
| 4th                                                     | 0                      | 0.06(.041:0.078)   | 0.083(0.061:0.104)             | 0.039(0.014:0.064)  | -0.044(-.075:-.012)                  | 0.0076 |
| richest                                                 | 0.10(0.090:0.12)       | 0.064(0.049:0.079) | 0.045(0.0035:0.086)            | 0.049(-.0068:0.105) | 0.0045(-.062:0.071)                  | 0.8937 |

### Hospital utilisation for in-patient care

Overall, hospitalisation rates have increased in both AP and Maharashtra (Table 6) but more so in AP (5.6 per 1000 population vs 2.2), although the DID was not statistically significant. The sub group analysis presented a mixed picture. For both male and female headed households there was a greater increase in hospitalisation in AP, but this reached moderate statistical significance only for female headed households (DID=27.6, 95% CI =1.1:54.1, p-value = 0.0415). There is an increase in hospitalisations among scheduled tribes in Maharashtra and a reduction in AP (DID = -19.8, 95% CI = -37.3: -2.3, p-value = 0.0272) but the opposite trend was seen among 'other excluded' groups with an increase in AP and a reduction in MH (DID = 12.5, 95% CI= 1.2:23.9 p-value = 0.0309). In scheduled castes hospitalisations had increased in both states but more so in AP, while in the 'other' group there was a small increase in MH and a small reduction in AP. In the poorest quintile, the increase in hospitalisation was significantly greater in MH (DID= -14.4, 95%CI=-28:-0.31, p= 0.0451).

Table 6: Changes in hospitalisation (per 1000 population) in Maharashtra and AP between 2004 and 2012

| Subgroups                                   | Baseline Mean (95% CI) |                  | Change 2004:2012 Mean (95% CI) |                   | DID                   |        |
|---------------------------------------------|------------------------|------------------|--------------------------------|-------------------|-----------------------|--------|
|                                             | Maharashtra            | Andhra Pradesh   | Maharashtra                    | Andhra Pradesh    | Mean (95%CI)          | p      |
| <b>Hospitalizations per 1000 population</b> |                        |                  |                                |                   |                       |        |
| All                                         | 41.3(37.3:45.2)        | 31.5(27.8:35.3)  | 2.2 (-4.7:9.1)                 | 5.6(-1.1:12.3)    | 3.4( -5.9 :12.7)      | 0.4636 |
|                                             |                        |                  |                                |                   | <b>DID (adjusted)</b> |        |
|                                             |                        |                  |                                |                   | 0.7(-8.6:10.2)        | 0.8685 |
| <b>Head of Household</b>                    |                        |                  |                                |                   |                       |        |
| Male                                        | 41.0(37.1:44.9)        | 31.7 (16.9:34.0) | 1.9( -5.1:8.8)                 | 4.4( -2.4:11.1)   | 2.5( -6.9:11.9)       | 0.5966 |
| Female                                      | 51.6 (30.6:72.5)       | 25.5(27.7:35.7)  | 13.9( -7.53:35.4)              | 41.5 ( 24.6:58.4) | 27.6( 1.1:54.1)       | 0.0415 |
| <b>Social Group</b>                         |                        |                  |                                |                   |                       |        |
| Scheduled Tribes                            | 23.7(14.2 :33.1615)    | 35.5(21.9:49.1)  | 17.1(5.8:28.5)                 | -2.7(-16.95:11.5) | -19.8(-37.3: -2.3)    | 0.0272 |
| Scheduled Castes                            | 42.4(36.3:48.4)        | 29.5(22.6:36.5)  | 3.9(-7.9:15.7)                 | 7.6( -2.6:17.7)   | 3.7( -11.4:18.7)      | 0.6268 |
| Other Excluded                              | 44.2(38.2:50.2)        | 29.9( 25.5:34.3) | -1.9(-11.2 :7.3109)            | 10.6(3.4:17.8)    | 12.5(1.2:23.9)        | 0.0309 |
| All other Groups                            | 42.5(37.1:47.9)        | 34.9(29.0:40.9)  | 0.93(-7.3:9.1)                 | -1.1(-9.4: 7.4)   | -2.0( -13.5 :9.4)     | 0.7235 |
| <b>Location</b>                             |                        |                  |                                |                   |                       |        |
| Rural                                       | 36.6(32.2:41)          | 28.9(26.4:31.5)  | 9.5(3.5:15.4)                  | 8.8(2.2:15.3)     | -0.69( -9.3:7.9)      | 0.8725 |
| Urban                                       | 48.2(43.7:53)          | 38.2(35.5:41.2)  | -7.9(-14.5: -1.3)              | -2.5( -12.1:7.1)  | 5.4(-5.8:16.6)        | 0.3358 |
| <b>Quintile</b>                             |                        |                  |                                |                   |                       |        |
| poorest                                     | 31.4(25.9:36.9)        | 27.5(22.8:32.1)  | 20.7(9:32.8)                   | 6.4( -1.7:14.4)   | -14.4(-28:-0.31)      | 0.0451 |
| 2nd                                         | 36.5(28.3:44.7)        | 27.1(21.9:32.4)  | 8(0.5:15.4)                    | 8.9( -5.6:18.4)   | 0.9( -10 : 12.5)      | 0.8746 |
| middle                                      | 47.8(33.6:62.1)        | 35.3(29.0:41.6)  | -1.5(-17.9:14.8)               | 4.1( -5.6:13.7)   | 5.6( -12.8:24.0)      | 0.5457 |
| 4th                                         | 46.9(39.9:53.9)        | 41.7(32.7:50.8)  | -4.0( -12:3.4)                 | -5.1( -15.7:5.4)  | -0.75( -13.3:11.9)    | 0.9056 |
| richest                                     | 51.0(46:56.1)          | 36.5(25.8:47.2)  | -13.1(-18.9: -7.1)             | 1.5( -19.5:22.6)  | 15.0( -5.8: 3.6)      | 0.1665 |

#### LIMITATIONS OF THE STUDY

Difference in difference estimations aimed at assessing the impacts of interventions, assume that both populations demonstrate similar characteristics prior to the start of the intervention, and that 'unobservables' follow a common trend; under such circumstances, any differences in changes observed over time between the 2 populations are attributable to the interventions<sup>39,40</sup>. Despite AP and Maharashtra having broadly similar socio-economic profiles, as well as our DID analysis taking account of a number of covariates, there may have been other factors resulting in unobserved differential changes between the 2 populations and to which the results of the DID analysis may be at least partially attributable.

A second limitation could arise from the impact of other public health programmes implemented during the period 2004 to 2012. The most significant of these is the National Rural Health Mission



1  
2  
3  
4  
5  
6  
7 launched in 2005, mainly to improve maternal and child health through the revitalization of rural  
8 primary care and child and maternal health services. A key assumption of our study is that the  
9 impacts of the NRHM in terms of healthcare expenditure for maternal and child health care would  
10 have been similar in both states, as this was a nationwide development. Despite the improvements  
11 in the public sector maternal and child health services sought by the NRHM, it is widely recognised  
12 that the public, including BPL families, continues to pay OOP for private health care. We have  
13 assumed that this behaviour is likely to be similar across the 2 states. Other health initiatives such as  
14 the Navsanjeevani Yojana and HMRI were unlikely to have had an impact on inpatient care or  
15 expenditure. The 108 scheme had the potential, in AP, to influence hospitalisation rates, by helping  
16 more households to visit hospitals when seriously ill. But the effect is likely to be small as the  
17 majority of even serious illnesses do not result in a 108 call for transport. The implementation of the  
18 RSBY and the scheme to make private hospital beds available for the poor in MH may have diluted  
19 the DID, although both schemes are known to have been only partially implemented.

20 Lastly, the 2004 NSSO survey which served as our baseline, was carried out between January and  
21 June 2004. Our end-line 2012 survey was carried out over a period of 3 months from June to  
22 September. The morbidity and mortality patterns recorded in different time periods may vary, and  
23 could have influenced the data.

## 24 DISCUSSION

25  
26 We found that average expenditure, large expenditures and large borrowings on inpatient care had  
27 increased in both MH and AP, but the increase was consistently smaller in AP across these 3  
28 outcome measures, and may be suggestive of Aarogyasri having a somewhat larger effect than RSBY.  
29 Similar increases in institutional deliveries across the 2 states, and low levels of utilisation of RSBY  
30 and Jeevandayee schemes in MH may further strengthen this explanation.

31 The increase in average OOPE on inpatient care in AP and MH reflects a trend observed  
32 nationwide<sup>16,41</sup>. The Aarogyasri scheme may have contributed to the more favourable trajectory in  
33 AP both directly and indirectly, in that the scheme may have contributed to a reduction in the prices  
34 of interventions and an increase in competition among health care providers. The evaluation of the  
35 Yeshasvini scheme also found a significant reduction in the price of surgical interventions<sup>10</sup>. Our  
36 findings may suggest that the positive effects of Aarogyasri detected by other studies<sup>15,16</sup> at an early  
37 stage of the roll out of the scheme have been sustained. Automatic enrolment into the scheme, near  
38 universality of coverage and no requirement for enrollee contributions may have contributed to the  
39 significant DIDs in male headed households, scheduled castes, rural households and the poorest and  
40 middle asset quintiles. But these benefits were not demonstrated in some of the most vulnerable  
41 groups - female headed households and scheduled tribes. This is consistent with the findings of  
42 other studies<sup>5,16</sup> which reported that the slightly less vulnerable may benefit more from such  
43 schemes, with non-financial barriers undermining access to services for the most vulnerable socio-  
44 economic groups. The case summaries below illustrate the obstacles they face. A similar observation  
45 was reported by the evaluation of the Mexican Seguro Popular health scheme which showed that a  
46 third of the treatment-cluster households who were automatically affiliated were unaware of this  
47 fact<sup>42</sup>.

48 The likely explanation of an Aarogyasri effect may be strengthened by the trend for large borrowings  
49 which has also increased over time in both states but less so in AP across all groups of analysis  
50 except the richest asset quintile. A multi-country analysis of household catastrophic health  
51 expenditure highlighted that increasing the availability of health services is critical to improving  
52 health in poor countries, but it could also raise the proportion of households facing catastrophic  
53 expenditure unless financial risk protection policies are given a high priority<sup>43</sup>. Borrowing of  
54 comparatively small amounts is less impactful and may be a result of improved access to financial



1  
2  
3  
4  
5  
6  
7  
8  
9  
10  
11  
12  
13  
14  
15  
16  
17  
18  
19  
20  
21  
22  
23  
24  
25  
26  
27  
28  
29  
30  
31  
32  
33  
34  
35  
36  
37  
38  
39  
40  
41  
42  
43  
44  
45  
46  
47  
48  
49  
50  
51  
52  
53  
54  
55  
56  
57  
58  
59  
60

markets and also supports consumption smoothening. During recent decades, AP has in particular witnessed a significant rise in microfinance institutions and debt due to high levels of interest levied by the more recent entrants to this market<sup>44, 45</sup>. Nevertheless our results suggest that increases in large borrowings associated with inpatient health care were smaller in AP. Strongly significant DID in scheduled tribes, rural households and the poorest and second asset quintiles and moderately significant DID in female headed households, scheduled castes, and other excluded social groups may also point to Aarogyasri beginning to offer greater ~~equity of~~ access to health care when families are faced with serious illness.

In terms of large OOPE, a significant DID was found only for the total households, but the direction of all DID except for the second asset quintile was the same as for average expenditure on inpatient care and large borrowings, i.e., in favour of AP. It is perfectly possible that the non-significant differences for the majority of sub groups are due at least in part to the RSBY, the availability of private sector hospital beds for the poor and the Jeevandayee schemes reducing large OOPE in MH, and that without these schemes the expenditure would have been greater. In AP, 70 percent of survey households reported that they were covered by the Aarogyasri scheme, but only 25 percent of these 'covered' households were aware that the benefit package was limited. It is also possible therefore that in AP some families seek hospital care assuming that the Aarogyasri scheme provides comprehensive cover, but are faced with large expenditures when their treatments fall outside the limits.

The mixed picture in relation to the increasing rate of hospitalisations in both states may suggest that the Aarogyasri and in particular, the RSBY scheme which covers common hospital procedures are addressing a large hitherto unmet need for inpatient care. The 108 scheme in AP may be an additional albeit smaller contributor. It may also be explained by a supplier-induced demand. An assessment of health provider behaviour and governance is an important strand of the evaluation of health financing schemes<sup>46</sup>, but was outside the remit of our study. We would however strongly recommend an impact evaluation focusing on health care supply to complement our evidence.

The greater increase in hospitalisation in AP, in female-headed households and 'other excluded groups', which are two of the most vulnerable population groups, is encouraging. But the reduction in hospitalisations among scheduled tribes and the poorest asset quintile in AP are of concern and suggest that if the poor are to secure the benefits appropriated by the near poor or more often by the rich<sup>47</sup>, the provision of more comprehensive health schemes is essential, which combines the tertiary and secondary care focus of Aarogyasri and the secondary care benefits of RSBY with attention paid to minimise barriers such as the widespread influence of illiteracy and lack of awareness, which limit access to even schemes such as Aarogyasri that are apparently highly inclusive and non-discriminatory, as well as distance to facilities. Our case summaries illustrate this. Furthermore, health financing reforms such as the Jamkesmas<sup>48</sup> in Indonesia and the Seguro Popular in Mexico<sup>42</sup>, both countries similar to India in terms of population and growing economies, include outpatient and inpatient care, and curative as well as preventive services, suggesting that a more comprehensive service is possible to implement and worthy of consideration.

In summary, health innovations in AP had a greater beneficial effect on hospital inpatient care-related expenditures than innovations in MH. The Aarogyasri scheme is likely to have contributed to these impacts in AP, at least in part. But in both states, OOPE increased over time. Hospitalisations also increased, and while it is generally assumed that in developing countries this is likely to address genuine need, its impact on health status is not known.

## IMPLICATIONS FOR POLICY AND PRACTICE

Despite these uncertainties, Aarogyasri is perceived, with some justification across India as a successful scheme, and is being rapidly replicated across the states. Since July 2012, MH too has

1  
2  
3  
4  
5  
6  
7 joined the list of states offering an Aarogyasri-like scheme, the Rajiv Gandhi Jeevandayee Arogya  
8 Yojana<sup>49</sup>. This study has highlighted that such schemes may result in some positive outcomes.  
9 Although the study was not designed to elicit the specific features of the scheme to which any  
10 comparatively greater benefits may be attributable, and which deserve to be replicated in other  
11 states, evidence from systematic reviews<sup>3</sup> points to the need for schemes to be more  
12 'comprehensively' designed to maximise their positive impact. Aarogyasri's design in terms of its  
13 aims to address both financial and non-financial barriers - being fully state funded, the systematic  
14 administrative implementation of Aarogyasri across the state so that it is now almost universal,  
15 automatic enrolment, allowing access to the scheme via a ration card which most poor families own,  
16 the wide spectrum of treatments offered, the large number of health care providers empanelled - is  
17 perhaps responsible as a 'comprehensive' package, for the greater impact.

18 | But the study also suggests that equity-of-improved access to health care and the reduction of the  
19 overall burden of OOPE especially in the most vulnerable sections of the population<sup>50</sup> are likely to  
20 require additional interventions that address gaps in the availability of care and provide patients  
21 appropriate pathways that support their journey from a strong and comprehensive primary care  
22 service where they may be informed of their entitlements and investigated for their initial symptoms  
23 to appropriate hospitals for the treatment of serious illness. Besides, inpatient care is only consumed  
24 by a small proportion of households in a year<sup>51</sup>, and this is especially true of tertiary care, while  
25 many more will seek outpatient services and referral to inpatient care, should this be required.  
26 Others have strongly recommended the strengthening of the primary care base as an essential  
27 means to universal health coverage and this study confirms their view<sup>41</sup>. Key implications for AP are  
28 to explore how best the most advantageous features of Aarogyasri can be extended to include both  
29 secondary and primary care, while those for MH may be to build on and unify its menu of currently  
30 available schemes to create an evidence-based comprehensive health delivery system. These  
31 conclusions may be applicable to other states with similar health financing schemes.

32 The design of health financing systems as well as their evaluations is complex and challenging, as the  
33 mountain of available evidence suggests<sup>41, 42, 51, 52</sup>. Even the ground-breaking Seguro Popular health  
34 insurance programme of Mexico which used a cluster-randomised trial design with strong  
35 government support demonstrated some but not all anticipated outcomes, contrary to  
36 expectations<sup>42</sup>, and a key recommendation was that continued assessment of the programme was  
37 needed. Furthermore, differences in data and methodology may result in even very well designed  
38 evaluations of the same programme producing contrasting findings<sup>52</sup>. Our evaluation is the first to  
39 use a quasi-experimental methodology - the best possible in the hierarchy of evaluation  
40 methodologies, when a randomised control trial is not achievable - to evaluate the health financing  
41 reforms in 2 large states of India. Despite that, the study has limitations which we have  
42 acknowledged. For example, the evaluation was not designed to assess provider behaviours. Many  
43 other pertinent questions such as the impact of the schemes on the overall economy of health care  
44 cannot be answered by a single evaluation. But these are recognised problems which can only be  
45 addressed through continuous assessments, as other evaluations have shown. Our study has  
46 nevertheless produced sufficient insights to enable policy leaders to improve programme  
47 effectiveness and, importantly, to undertake further assessment. Our household survey data provide  
48 a valuable baseline for future monitoring in both states.

49 This study needs to be followed up with further and repeated evaluations as AP's and MH's schemes  
50 evolve; to assess the impacts of re-design and to help health policy leaders achieve their aspiration  
51 of universal access to good quality health care.  
52  
53  
54  
55

### Three faces of the Aarogyasri Scheme

#### The beneficiary:

Lakshamma, a 65 year old widow, is from a tribal background. She is an unskilled labourer, supporting a family of 5, with a monthly income of INR 4000 (USD 74). She was referred to a municipal hospital with chest pain and underwent heart surgery. The hospital which is a part of the Aarogyasri network provided free care and her total out of pocket expenses amounted to INR 850 (16 USD) for initial transport. In addition to the surgery, she received free food, money for transport home and follow up medicines. She is very satisfied with the service she received.

#### The excluded:

Ramulamma, a mother has a BPL card, but her daughter Lakshmi does not, as she was abandoned by her husband who is a government employee and entitled to free health care. The mother was unable to secure free care using her BPL card for her seriously ill daughter who paid out-of-pocket at a private facility where she was offered a hysterectomy for the relief of her gynaecological symptoms. Lakshmi's health care costs were met by the family selling a number of household assets and Lakshmi's daughter discontinuing her education to take up paid work. Lakshmi is severely depressed and does not speak to anyone.

#### The uninformed:

Krishnamma 43 years old, had severe stomach pains one night. Although the family had a BPL card, Ramulu her husband and Srinivas her son rushed her to a private hospital nearby, which was not part of the Aarogyasri network. They were unaware of how to access the Aarogyasri scheme hospitals which were further away from home, and the local primary health services being inadequate, Krishnamma had not had her initial symptoms investigated. The treatment was funded through a loan from a private moneylender. On discharge, she has not attended follow up, as the family cannot afford transport or medicines.

#### References

<sup>1</sup> Resolution WHA58.33. Sustainable health financing, universal coverage and social health insurance. In: *Fifty-eighth World Health Assembly, Geneva, 16–25 May 2005*. Geneva, World Health Organization, 2005 ([http://apps.who.int/gb/ebwha/pdf\\_files/WHA58/WHA58\\_33-en.pdf](http://apps.who.int/gb/ebwha/pdf_files/WHA58/WHA58_33-en.pdf), accessed 26<sup>th</sup> March 2013).

- 1  
2  
3  
4  
5  
6  
7  
8 <sup>2</sup> World Health Organization. Health Systems Financing Path to Universal Coverage. Geneva: World Health Organization. 2010. Available from: World Health Organization Library Information Services.
- 9 <sup>3</sup> Acharya A, Vellakkal S, Taylor F, Masset E, Satija A, Burke M, Ebrahim S. Impact of national health insurance for the poor and the informal sector in low and middle income countries : a systematic review. London: EPPICentre, Social Science Research Unit, Institute of Education, University of London. 2012. Available from: <http://www.dfid.gov.uk/r4d/PDF/Outputs/SystematicReviews/Health-insurance-2012Acharya-report.pdf>
- 10 <sup>4</sup> Giedion, U., B. Y. Diaz . A Review of the evidence. In: The Impact of Health Insurance in Low-and Middle-Income Countries. M. L. Escobar, C. Griffin and R. P. Shaw (ed). Washington DC, Brookings Inst Press 2011.
- 11 <sup>5</sup> Giedion, U, Alfonso, E , Diaz. *The impact of universal coverage schemes in the developing world : a review of the existing evidence*. Universal Health Coverage (UNICO) studies series ; no. 25. Washington D.C. : The World Bank. 2013
- 12 <sup>6</sup> National Commission on Macroeconomics and Health. Report of the National Commission on Macroeconomics and Health. New Delhi: Ministry of Health and Family Welfare of India. 2005. Available from: Ministry of Health and Family Welfare
- 13 <sup>7</sup> Eleventh Five Year Plan (2007–2012). Vol 2: Social Sector. Government of India Planning Commission. October, 2008. [http://planningcommission.nic.in/plans/planrel/fiveyr/11th/11\\_v2/11th\\_vol2.pdf](http://planningcommission.nic.in/plans/planrel/fiveyr/11th/11_v2/11th_vol2.pdf), (accessed Mar 26 2013).
- 14 <sup>8</sup> Faster, Sustainable and More Inclusive Growth. An Approach to the Twelfth Five Year Plan (2012-17). Government of India Planning Commission. October, 2011. [http://planningcommission.nic.in/plans/planrel/12appdrft/approach\\_12plan.pdf](http://planningcommission.nic.in/plans/planrel/12appdrft/approach_12plan.pdf), accessed 26th March 2013
- 15 <sup>9</sup> La Forgia G, Nagpal S. Government-Sponsored Health Insurance in India. *Are You Covered?* World Bank Washington DC 2012. doi:10.1596/978-0-8213-9618-6.
- 16 <sup>10</sup> Agarwal A. "Impact evaluation of India's 'Yeshasvini' community based health insurance programme. *Health Economics* 2010; 19: 5-35
- 17 <sup>11</sup> See The scheme website at <https://www.aarogyasri.org/ASRI/index.jsp>, accessed 26<sup>th</sup> March 2013.
- 18 <sup>12</sup> Scheme status. <http://www.rsby.gov.in/statewise.aspx?state=35> (accessed Apr 30 2013)
- 19 <sup>13</sup> Mahal A. Learning and getting better: Rigorous evaluation of health policy in India. *National Medical Journal of India*. 2011. 325-27.
- 20 <sup>14</sup> Aarogyasri Health Care Trust Annual Report 2011-2012. [https://www.aarogyasri.org/ASRI/EXT\\_IMAGES/documents/Annual\\_Report\\_201011.pdf](https://www.aarogyasri.org/ASRI/EXT_IMAGES/documents/Annual_Report_201011.pdf) (accessed Mar 26 2013)
- 21 <sup>15</sup> Rao M, Ramachandra S, Bandyopadhyay S, et al. Addressing healthcare needs of people living below the poverty line: a rapid assessment of the Andhra Pradesh Health Insurance Scheme. *National Medical Journal of India*. 2011. 24(6):335-41.
- 22 <sup>16</sup> Fan V, Karan A, Mahal A. "State Health Insurance and Out-of-Pocket Health Expenditures in Andhra Pradesh, India." CGD Working Paper 298. Washington, D.C.: Center for Global Development. 2012 <http://www.cgdev.org/content/publications/detail/1426275> (accessed Mar 15 2013)
- 23 <sup>17</sup> Palacios R, Das J, Sun C eds. India's health insurance scheme for the poor: Evidence from the early experience of Rashtriya Swasthya Bima Yojana. New Delhi: Center for Policy Research; 2011
- 24 <sup>18</sup> Rashtriya Swasthya Bima Yojana overview and scheme details. <http://www.rsby.gov.in> (accessed Apr 30 2013)
- 25 <sup>19</sup> Rathi P. <http://www.priorities2012.com/documents/3d-4-patreek.pdf>
- 26 <sup>20</sup> NRHM Mission Document. [http://www.nird.org.in/brgf/doc/Rural%20HealthMission\\_Document.pdf](http://www.nird.org.in/brgf/doc/Rural%20HealthMission_Document.pdf) (accessed Apr 30 2013)
- 27 <sup>21</sup> State HMIS data analysis, April'10-March'11 Andhra Pradesh, prepared by NHSRC. [http://cfw.ap.nic.in/nrhm/pdf/AP\\_Analysis\\_Apr2010-Mar2011.pdf](http://cfw.ap.nic.in/nrhm/pdf/AP_Analysis_Apr2010-Mar2011.pdf) (accessed May 2 2013)
- 28 <sup>22</sup> NRHM achievements in Maharashtra. <http://www.nrhm.maharashtra.gov.in/achievements.htm> (accessed May 2 2013)
- 29 <sup>23</sup> Health information helpline. <http://www.hmri.in/oursolutions-healthinformation.html> (accessed Apr 30 2013)
- 30 <sup>24</sup> About the project/scheme. <http://www.maha-arogyasri.gov.in/projectandschemes/Jeevandaiaarogyasri/default.htm> (accessed Apr 30 2013)
- 31 <sup>25</sup> Jeevandayee scheme performance: Information received from Rajiv Gandhi Jeevandayee Arogya Yojana Society Govt of Maharashtra on May 17 2013
- 32 <sup>26</sup> Projects and schemes. <http://maha-arogyasri.gov.in/projectandschemes/itdpnavsanjivani%5Cdefault.htm> (accessed Apr 30 2013)

- 1  
2  
3  
4  
5  
6  
7  
8  
9  
10  
11  
12  
13  
14  
15  
16  
17  
18  
19  
20  
21  
22  
23  
24  
25  
26  
27  
28  
29  
30  
31  
32  
33  
34  
35  
36  
37  
38  
39  
40  
41  
42  
43  
44  
45  
46  
47  
48  
49  
50  
51  
52  
53  
54  
55  
56  
57  
58  
59  
60
- <sup>27</sup> Mallepeddi R , Pernefeldt H, Bergkvist S . Andhra Pradesh health sector reform, A narrative case study, Technical paper No.7 for The Rockefeller Foundation–Sponsored Initiative on the Role of the Private Sector in Health Systems in Developing Countries. 2009 ; pp 42-48
- <sup>28</sup> EMRI. <http://www.emri.in/states.html> (accessed Apr 30 2013)
- <sup>29</sup> Developing and evaluating complex interventions: new guidance. Medical Research Council. London 2008.
- <sup>30</sup> Cesar G V, Jean-Pierre H, Jennifer B. Evidence-Based Public Health: Moving Beyond Randomized Trials. *Am J Public Health*. 2004 March; 94(3): 400–405.
- <sup>31</sup> Presentation on Annual Plan 2012-13 and Five Year Plan 2012-17. [http://planningcommission.nic.in/plans/stateplan/Presentations12\\_13/maharashtra1213.pdf](http://planningcommission.nic.in/plans/stateplan/Presentations12_13/maharashtra1213.pdf) (accessed on mar 25 2013)
- <sup>32</sup> National Sample Survey Organization. Morbidity, Healthcare and condition of the Aged. New Delhi: Ministry of Statistics and Programme Implementation. 2004.
- <sup>33</sup> National Sample Survey Organization. Household Consumer Expenditure 66<sup>th</sup> round . New Delhi: Ministry of Statistics and Programme Implementation; 2009-10
- <sup>34</sup> National Sample Survey Organization. Household Consumer Expenditure in India. New Delhi: Ministry of Statistics and Programme Implementation; 2005.
- <sup>35</sup> Booyesen F, Van der Berg S & Burger R. Using an Asset Index to Assess Trends in Poverty in Seven Sub-Saharan African Countries. *World Development*. 2008; 36(6): 1113–1130
- <sup>36</sup> Vyas S. & Kumarnayake L. Constructing socio-economic status indices: How to use principal components analysis. *Health Policy and planning*. 2006; 459-468
- <sup>37</sup> O'Donnell O, Van Doorslaer E, Wagstaff A & Lindelow M, 2008. Analyzing Health Equity Using Household Survey Data: A Guide to Techniques and Their Implementation. Washington DC: World Bank Institute. Chapter 6, Measurement of Living Standards. <http://siteresources.worldbank.org/INTPAH/Resources/Publications/459843-1195594469249/HealthEquityFINAL.pdf> (accessed May 9 2013)
- <sup>38</sup> Ministry of Finance. Economic Survey 2011-12. New Delhi: Government of India. 2012. Available from: <http://indiabudget.nic.in/>
- <sup>39</sup> Poverty Reduction and Social Development Department. A User's Guide to Poverty and Social Impact Analysis. Washington: World Bank;2003
- <sup>40</sup> Gertler P, Martinez S, Premand P, Rawlings L, Vermeersch C. Impact Evaluation in Practice. Washington: World Bank; 2011.
- <sup>41</sup> Selvaraj S, Karan A. Why Publicly-Financed Health Insurance Schemes Are Ineffective in Providing Financial Risk Protection. *Economic and Political Weekly* 2012 March 17; XLVII(11):60-68
- <sup>42</sup> King G, Gakidou E, Imai K, Lakin J, Moore RT, Nall C. Public policy for the poor? A randomised assessment of the Mexican universal health programme. *Lancet*. 2009 Apr 8; DOI:10.1016/S0140-6736(09)60239-7.
- <sup>43</sup> Xu K, Evans DB, Kawabata K, Zeramdini R, Klavus J, Murray CJ. Household catastrophic health expenditure: a multicountry analysis. *Lancet*. 2003 Jul 12;362(9378):111-7.
- <sup>44</sup> Naga Sridhar G. Microfinance institutions: Moving beyond AP crisis. *The Business Line [Newspaper Online]*. 2012 Dec 29. Available from: <http://www.thehindubusinessline.com/companies/microfinance-institutions-moving-beyond-ap-crisis/article4253239.ece>
- <sup>45</sup> Naga Sridhar G. Life after microfinance in AP. *The Business Line [Newspaper Online]*. 2013 Jan 4. Available from: <http://www.thehindubusinessline.com/opinion/life-after-microfinance-in-ap/article4273183.ece>
- <sup>46</sup> Prasad N P, Raghavendra P. Healthcare models in the era of medical neoliberalism. A study of Aarogyasri in Andhra Pradesh. *Economic and Political Weekly* 2012 Oct 27;XLVII(43):118-126
- <sup>47</sup> Health Systems 20-20. An Evaluation of the Effects of the National Health Insurance Scheme in Ghana. Bethesda: Health Systems 20-20. 2009.
- <sup>48</sup> <http://www.jointlearningnetwork.org/programs/compare/benefits/142%2C16>
- <sup>49</sup> Rajiv Jeevandayi scheme details. <http://www.jeevandayee.gov.in/RGJAY/FrontServlet?requestType=CommonRH&actionVal=RightFrame&page=undefined%3E%3E%3Cb%3ERGJAY%3C/b%3E&pageName=RGJAY&mainMenu=About&subMenu=RGJAY> (accessed on Apr 30 2013)
- <sup>50</sup> Tangcharoensathien V, Swasdiworn W, Jongudomsuk P et al . Universal Coverage Scheme in Thailand: Equity Outcomes and Future Agendas to Meet Challenges. Geneva: World Health Organization. 2010.
- <sup>51</sup> Dilip TR. On Publicly-Financed Health Insurance Schemes. Is the analysis premature? *Economic and Political Weekly*. 2012 May 5; XLVII(1)8:79-80.

1  
2  
3  
4  
5  
6  
7  
8  
9  
10  
11  
12  
13  
14  
15  
16  
17  
18  
19  
20  
21  
22  
23  
24  
25  
26  
27  
28  
29  
30  
31  
32  
33  
34  
35  
36  
37  
38  
39  
40  
41  
42  
43  
44  
45  
46  
47  
48  
49  
50  
51  
52  
53  
54  
55  
56  
57  
58  
59  
60

---

<sup>52</sup> Vallakal S, Ebrahim S. Publicly-Financed Health Insurance Schemes. Concerns about Impact Assessment. Economic and Political Weekly. 2013 Jan 5; XLVIII(1);24-27.

For peer review only

STROBE Statement—Checklist of items that should be included in reports of *cross-sectional studies*

|                              | Item No | Recommendation                                                                                                                                                                                                                                                                                                                                                                                           |
|------------------------------|---------|----------------------------------------------------------------------------------------------------------------------------------------------------------------------------------------------------------------------------------------------------------------------------------------------------------------------------------------------------------------------------------------------------------|
| <b>Title and abstract</b>    | 1       | (a) Indicate the study's design with a commonly used term in the title or the abstract<br><b>Yes</b>                                                                                                                                                                                                                                                                                                     |
|                              |         | (b) Provide in the abstract an informative and balanced summary of what was done and what was found <b>Yes</b>                                                                                                                                                                                                                                                                                           |
| <b>Introduction</b>          |         |                                                                                                                                                                                                                                                                                                                                                                                                          |
| Background/rationale         | 2       | Explain the scientific background and rationale for the investigation being reported<br><b>Yes</b>                                                                                                                                                                                                                                                                                                       |
| Objectives                   | 3       | State specific objectives, including any prespecified hypotheses <b>Yes</b>                                                                                                                                                                                                                                                                                                                              |
| <b>Methods</b>               |         |                                                                                                                                                                                                                                                                                                                                                                                                          |
| Study design                 | 4       | Present key elements of study design early in the paper <b>Yes</b>                                                                                                                                                                                                                                                                                                                                       |
| Setting                      | 5       | Describe the setting, locations, and relevant dates, including periods of recruitment, exposure, follow-up, and data collection <b>Yes</b>                                                                                                                                                                                                                                                               |
| Participants                 | 6       | (a) Give the eligibility criteria, and the sources and methods of selection of participants <b>Yes</b>                                                                                                                                                                                                                                                                                                   |
| Variables                    | 7       | Clearly define all outcomes, exposures, predictors, potential confounders, and effect modifiers. Give diagnostic criteria, if applicable <b>Yes</b>                                                                                                                                                                                                                                                      |
| Data sources/<br>measurement | 8*      | For each variable of interest, give sources of data and details of methods of assessment (measurement). Describe comparability of assessment methods if there is more than one group <b>Yes</b>                                                                                                                                                                                                          |
| Bias                         | 9       | Describe any efforts to address potential sources of bias <b>Yes</b>                                                                                                                                                                                                                                                                                                                                     |
| Study size                   | 10      | Explain how the study size was arrived at <b>Yes</b>                                                                                                                                                                                                                                                                                                                                                     |
| Quantitative variables       | 11      | Explain how quantitative variables were handled in the analyses. If applicable, describe which groupings were chosen and why <b>Yes</b>                                                                                                                                                                                                                                                                  |
| Statistical methods          | 12      | (a) Describe all statistical methods, including those used to control for confounding<br><b>Yes</b><br>(b) Describe any methods used to examine subgroups and interactions<br>(c) Explain how missing data were addressed <b>Method identical to baseline NSSO survey</b><br>(d) If applicable, describe analytical methods taking account of sampling strategy<br>(e) Describe any sensitivity analyses |
| <b>Results</b>               |         |                                                                                                                                                                                                                                                                                                                                                                                                          |
| Participants                 | 13*     | (a) Report numbers of individuals at each stage of study—eg numbers potentially eligible, examined for eligibility, confirmed eligible, included in the study, completing follow-up, and analysed <b>Yes</b><br>(b) Give reasons for non-participation at each stage<br>(c) Consider use of a flow diagram                                                                                               |
| Descriptive data             | 14*     | (a) Give characteristics of study participants (eg demographic, clinical, social) and information on exposures and potential confounders <b>Yes</b><br>(b) Indicate number of participants with missing data for each variable of interest                                                                                                                                                               |
| Outcome data                 | 15*     | Report numbers of outcome events or summary measures <b>Yes</b>                                                                                                                                                                                                                                                                                                                                          |
| Main results                 | 16      | (a) Give unadjusted estimates and, if applicable, confounder-adjusted estimates and their precision (eg, 95% confidence interval). Make clear which confounders were adjusted for and why they were included <b>Yes</b><br>(b) Report category boundaries when continuous variables were categorized                                                                                                     |



1  
2  
3  
4  
5  
6  
7  
8  
9  
10  
11  
12  
13  
14  
15  
16  
17  
18  
19  
20  
21  
22  
23  
24  
25  
26  
27  
28  
29  
30  
31  
32  
33  
34  
35  
36  
37  
38  
39  
40  
41  
42  
43  
44  
45  
46  
47  
48  
49  
50  
51  
52  
53  
54  
55  
56  
57  
58  
59  
60

(c) If relevant, consider translating estimates of relative risk into absolute risk for a meaningful time period

|                          |    |                                                                                                                                                                                       |
|--------------------------|----|---------------------------------------------------------------------------------------------------------------------------------------------------------------------------------------|
| Other analyses           | 17 | Report other analyses done—eg analyses of subgroups and interactions, and sensitivity analyses <b>Yes</b>                                                                             |
| <b>Discussion</b>        |    |                                                                                                                                                                                       |
| Key results              | 18 | Summarise key results with reference to study objectives <b>Yes</b>                                                                                                                   |
| Limitations              | 19 | Discuss limitations of the study, taking into account sources of potential bias or imprecision. Discuss both direction and magnitude of any potential bias <b>Yes</b>                 |
| Interpretation           | 20 | Give a cautious overall interpretation of results considering objectives, limitations, multiplicity of analyses, results from similar studies, and other relevant evidence <b>Yes</b> |
| Generalisability         | 21 | Discuss the generalisability (external validity) of the study results <b>Yes</b>                                                                                                      |
| <b>Other information</b> |    |                                                                                                                                                                                       |
| Funding                  | 22 | Give the source of funding and the role of the funders for the present study and, if applicable, for the original study on which the present article is based <b>Yes</b>              |

\*Give information separately for exposed and unexposed groups.

**Note:** An Explanation and Elaboration article discusses each checklist item and gives methodological background and published examples of transparent reporting. The STROBE checklist is best used in conjunction with this article (freely available on the Web sites of PLoS Medicine at <http://www.plosmedicine.org/>, Annals of Internal Medicine at <http://www.annals.org/>, and Epidemiology at <http://www.epidem.com/>). Information on the STROBE Initiative is available at [www.strobe-statement.org](http://www.strobe-statement.org).



# BMJ Open

## Changes in addressing inequalities in access to hospital care in Andhra Pradesh and Maharashtra states of India. A cross sectional difference-in-differences study

|                                 |                                                                                                                                                                                                                                                                                                                                                                                                                                                                                                                                                                                    |
|---------------------------------|------------------------------------------------------------------------------------------------------------------------------------------------------------------------------------------------------------------------------------------------------------------------------------------------------------------------------------------------------------------------------------------------------------------------------------------------------------------------------------------------------------------------------------------------------------------------------------|
| Journal:                        | <i>BMJ Open</i>                                                                                                                                                                                                                                                                                                                                                                                                                                                                                                                                                                    |
| Manuscript ID:                  | bmjopen-2013-004471.R2                                                                                                                                                                                                                                                                                                                                                                                                                                                                                                                                                             |
| Article Type:                   | Research                                                                                                                                                                                                                                                                                                                                                                                                                                                                                                                                                                           |
| Date Submitted by the Author:   | 06-May-2014                                                                                                                                                                                                                                                                                                                                                                                                                                                                                                                                                                        |
| Complete List of Authors:       | Rao, Mala; University of East London, Institute for Health and Human Development<br>Katyal, Anuradha; ACCESSHealth International,<br>Singh, Prabal; ACCESSHealth International,<br>Samarth, Amit; Sughavazhvu Healthcare,<br>Bergkvist, Sofi; ACCESSHealth International,<br>Kancharla, Manjusha; Indian School of Business,<br>Wagstaff, Adam; World Bank, Development Research Group<br>Netuveli, Gopalakrishnan; University of East London, Institute for Health and Human Development<br>Renton, Adrian; University of East London, Institute for Health and Human Development |
| <b>Primary Subject Heading</b>: | Public health                                                                                                                                                                                                                                                                                                                                                                                                                                                                                                                                                                      |
| Secondary Subject Heading:      | Health services research                                                                                                                                                                                                                                                                                                                                                                                                                                                                                                                                                           |
| Keywords:                       | Health economics < HEALTH SERVICES ADMINISTRATION & MANAGEMENT, Health policy < HEALTH SERVICES ADMINISTRATION & MANAGEMENT, PUBLIC HEALTH                                                                                                                                                                                                                                                                                                                                                                                                                                         |
|                                 |                                                                                                                                                                                                                                                                                                                                                                                                                                                                                                                                                                                    |

SCHOLARONE™  
Manuscripts

**TITLE PAGE****TITLE:**

**Changes in addressing inequalities in access to hospital care in Andhra Pradesh and Maharashtra states of India. A cross sectional difference-in-differences study**

**STUDY DESIGN:** A cross-sectional difference in differences study with parallel control.

**AUTHOR NAMES, ADDRESSES AND POSITIONS:**

1.Mala Rao. Professor of International Health, Institute for Health and Human Development, University of East London, UK & Honorary Adviser, Administrative Staff College of India, Hyderabad

2. Anuradha Katyal, Consultant, ACCESS Health International, Hyderabad, India

3.Prabal V Singh, Director Research, ACCESS Health International, Hyderabad, India

4.Amit Samarth, Head, Strategy and Planning, SughaVazhvu Healthcare, Thanjavur, India

5.Sofi Bergkvist, Managing Director, ACCESS Health International, Hyderabad, India

6.Manjusha Kancharla, Research Associate, Indian School of Business, Hyderabad India

7.Adam Wagstaff, Research Manager, Human Development & Public Services team, Development Research Group (DECRG), The World Bank, Washington DC, USA

8.Gopalakrishnan Netuveli. Professor of Public Health, Institute for Health and Human Development, University of East London & ESRC International Centre for Life Course Studies in Society and Health, University College London, UK

9.Adrian Renton. Director, Institute for Health and Human Development, University of East London, UK

**All authors had full access to all the data (including statistical reports and tables) and can take responsibility for the integrity of the data and the accuracy of the data analysis**

**Corresponding author and guarantor of the data and information:** Mala Rao (best email address: m.rao@uel.ac.uk).

**M Rao affirms that the manuscript is an honest, accurate and transparent account of the study being reported and no important aspects of the study have been omitted.**

**FUNDED BY :** Wellcome Trust, IDRC, Rockefeller Foundation, DFID, World Bank.

**ROLE OF THE FUNDING SOURCES:** The external funding sources had no role in study design, data collection, analysis, interpretation or reporting, or in submission decision.

**ROLE OF THE STUDY SPONSOR:** The study was carried out in response to the formal invitation of the Government of Andhra Pradesh which supported our applications for funding (by providing formal

1  
2  
3 letters of support). The Government did not provide any funding, and had no role in study design,  
4 data collection, analysis, interpretation or reporting, or in submission decision.  
5

6 **STATEMENT OF INDEPENDENCE OF RESEARCHERS:** The authors can confirm that they worked  
7 independently from the Funders and Government of Andhra Pradesh who had no role in any aspect  
8 of the research  
9

#### 10 **CONFLICT OF INTEREST**

11  
12 All authors have completed the ICMJE forms for disclosure of potential conflicts of interest (available  
13 on request from the corresponding author) and declare that 1) MR, AK, PS, AS, and SB have support  
14 from the Rockefeller Foundation, Wellcome Trust, International Development Research Centre,  
15 Canada and Department for International Development, UK, 2) the authors have no relationships  
16 with the funders that might have an interest in the submitted work in the previous 3 years, 3) the  
17 authors' spouses, partners, or children have no financial relationships that may be relevant to the  
18 submitted work, and 4) the authors have no non-financial interests that may be relevant to the  
19 submitted work, and 20  
21 submitted work.  
22

23 **ETHICAL APPROVAL:** given by the research ethics committee of the Administrative Staff College of  
24 India, Hyderabad, which hosted the study. Household survey questionnaires include signed consent  
25 by the head of the household or another adult representative of the household.  
26  
27

28  
29 **DATA SHARING STATEMENT:** The 2004 National Sample Survey Organisation of India household  
30 survey questionnaire and data are available to the public. The 2012 household survey questionnaire,  
31 and the full anonymised household survey dataset will be available with open access as soon as the  
32 data analyses and submissions for publication are completed.  
33  
34

35 **COPYRIGHT STATEMENT:** Mala Rao, the Corresponding Author has the right to grant on behalf of all  
36 authors and does grant on behalf of all authors, an exclusive licence on a worldwide basis to the BMJ  
37 Publishing Group Ltd to permit this article (if accepted) to be published in BMJ editions and any  
38 other BMJ PGL products and sublicences such use and exploit all subsidiary rights, as set out in your  
39 licence.  
40  
41

42 **STROBE CHECKLIST FOR CROSS SECTIONAL STUDIES:** We can confirm that all 22 items in the  
43 STROBE checklist are included in the paper.  
44  
45

#### 46 **CONTRIBUTORS' STATEMENT**

47  
48 MR conceived and designed the study, applied for funding, and was responsible for the supervision  
49 and management of all aspects of the study as well as the dissemination of its results. She is also the  
50 guarantor of the study. SB shared responsibility for the conception of the study, applications for  
51 funding, study design and data collation and analysis, contributed to the questionnaire design and  
52 commented on drafts of the report. PS contributed to the conception of the study and study design,  
53 led the questionnaire design and survey implementation, including training of survey staff,  
54 monitoring survey progress and data collation and verification, commented on drafts of the report  
55 and helped prepare the references. AK undertook the data collation, verification and analysis,  
56 assisted with the survey and questionnaire design and survey implementation and prepared the  
57  
58  
59  
60

1  
2  
3 tables for the report. AS led the literature review, assisted with the study and questionnaire design,  
4 survey implementation and preparation and analysis of baseline data, and commented on drafts of  
5 the report. MK helped with the data analysis. AW devised the methodology for the estimation of the  
6 programme impacts, advised during the data-collection and data-preparation stages, wrote and  
7 implemented the computer code for the model estimation, helped to oversee the production of the  
8 results, and contributed text to the report. GN provided technical advice on accounting for the  
9 complex survey structure in the analysis, developed a STATA equation, helped to compute an asset  
10 index, advised on the output tables, verified the analysis and commented on drafts of the report. AR  
11 helped develop a conceptual framework for the evaluation, advised on funding proposals, the study  
12 design, analytical methodology and presentation of results and contributed text to the report. MR  
13 wrote the first draft of the paper and its redrafts in accordance with the comments of all other  
14 authors and reviewers.  
15  
16  
17  
18  
19  
20  
21  
22  
23  
24  
25  
26  
27  
28  
29  
30  
31  
32  
33  
34  
35  
36  
37  
38  
39  
40  
41  
42  
43  
44  
45  
46  
47  
48  
49  
50  
51  
52  
53  
54  
55  
56  
57  
58  
59  
60

**ABSTRACT. WORD COUNT: 300****OBJECTIVES**

To compare the effects of the Rajiv Aarogyasri Health Insurance Scheme of Andhra Pradesh (AP) with health financing innovations including the RSBY in Maharashtra (MH) over time on access to and out of pocket expenditure (OOPE) on hospital inpatient care.

**STUDY DESIGN**

A cross-sectional difference in differences (DID) study with parallel control.

**SETTING**

National Sample Survey Organisation of India (NSSO) urban and rural 'first stratum units', 863 in AP and 1008 in MH.

**METHODS**

We used two cross-sectional surveys: as a baseline, the data from the NSSO 2004 survey collected before the Aarogyasri and RSBY schemes were launched and as post-intervention, a survey using the same methodology conducted in 2012.

**PARTICIPANTS**

8623 households in AP and 10073 in MH

**MAIN OUTCOME MEASURES**

Average OOPE, large OOPE and large borrowing per household per year for inpatient care, hospitalisation rate per 1000 population per year.

**RESULTS**

Average expenditure, large expenditures and large borrowings on inpatient care had increased in both MH and AP, but the increase was smaller in AP across these 3 measures. DID for average expenditure and large borrowings were significant and in favour of AP for the rural and the poorest households. Hospitalisation rates also increased in both states but more so in AP, although the DID was not significant and the sub group analysis presented a mixed picture.

**CONCLUSIONS**

Health innovations in AP had a greater beneficial effect on inpatient care-related expenditures than innovations in MH. The Aarogyasri scheme is likely to have contributed to these impacts in AP at least in part. However, out of pocket expenditure increased in both states over time. Schemes such as the Aarogyasri and RSBY may result in some positive outcomes but, additional interventions may be required, to improve access to care for the most vulnerable sections of the population.

**ARTICLE SUMMARY****STRENGTHS AND LIMITATIONS OF THE STUDY**

- This study uses 2 cross-sectional surveys to compare changes between the Indian states of Andhra Pradesh and Maharashtra, in hospital inpatient care related expenditures and behaviours before and after the rollout of the Aarogyasri and RSBY schemes
- The study based on a survey of 18696 households has shown that health innovations in Andhra Pradesh had a greater beneficial effect on hospital inpatient care-related expenditures and access than innovations in Maharashtra. The Aarogyasri scheme is likely to have contributed to these impacts in Andhra Pradesh.
- The study also highlights the implications of the findings for policy and practice and additional interventions necessary to address gaps in the availability of and access to care.
- The study is only able to compare the effects of health innovations over time across the 2 states but does not allow the drawing of inferences on the impacts of individual initiatives.
- The study uses the difference in differences methodology and its findings may have been affected by unobservable differential changes between the 2 states.

**ACKNOWLEDGEMENTS:**

The study was funded by the International Development Research Centre, Canada, the Wellcome Trust, the UK Department for International Development, and Rockefeller Foundation. The World Bank supported Adam Wagstaff's contribution to the study. We gratefully acknowledge the financial support of these organisations, as well as the enthusiastic encouragement we have received from them throughout the study. Our thanks also go to Bhimasankaram Pochiraju, Sundaresh Peri, C Ravi, and Rahul Ahluwalia for their advice and guidance at various stages of the study design and data analysis, and to colleagues at the University of East London and Administrative Staff College of India Hyderabad for their administrative support. The authors also thank P Suryanarayana, CM Reddy, D Chakrapani and K Pandu Ranga Reddy and AY Jadhav and his colleagues for their contribution to the training of the survey teams, verification of the survey and data collection and acknowledge the IMRB International Social Research Institute team's support in carrying out the survey.

We are grateful to Somil Nagpal and Joseph Kutzin for commenting on the report and helping us to improve it, to Sujatha Rao for her encouragement and valuable suggestions and ideas throughout the course of the study and to Jay Bagaria for her help during the early stage of the development of the proposal. Finally we thank PV Ramesh without whose constant support, guidance and encouragement, this study would not have been possible.

## INTRODUCTION

In 2005, member states of the World Health Organization (WHO) committed to develop their health financing systems to deliver universal coverage (UC); that is that all people have access to health services and do not suffer financial hardship paying for them<sup>1</sup>. WHO's 2010 World Health Report<sup>2</sup> recommended *inter alia* that countries reduce reliance on direct payments, and improve equity of access, including through the introduction of prepayment schemes. However, one recent systematic review of the impact of national health insurance schemes in low and middle income countries<sup>3</sup> found only weak evidence of increased use of healthcare and reduced out-of-pocket expenses, with the poorer benefitting less, whilst others<sup>4,5</sup> concluded that health insurance improved health care access and use, as well as financial protection in most cases but had no conclusive impact on health status. Both highlighted the need for more rigorous assessments of such schemes.

India has one of the highest levels of out-of-pocket health expenditure (more than 80% of private health expenditure)<sup>6</sup>. The aim of our study was to explore how recently introduced health financing initiatives have affected access to and out-of-pocket expenditure (OOPE) on inpatient hospital care in the Indian states of Andhra Pradesh (AP) and Maharashtra (MH).

## BACKGROUND

In its *Eleventh Five Year Plan (2007-12)*<sup>7</sup>, Government of India sought to increase Public Expenditure on Health and to strengthen investment in rural health infrastructure through the National Rural Health Mission. Its *Twelfth Five Year Plan (2012-17)*<sup>8</sup>, reflected the recommendation of the Planning Commission's High Level Expert Group for general taxation to be the principal source of health care financing. It proposed the development of government-funded health insurance schemes, building on the evidence from experimental schemes being introduced across many States. In India, health is primarily a state rather than national responsibility<sup>6</sup>. Whilst it is recognised that political will and good governance are essential, both the political mobilization of funds for health schemes and the effectiveness and efficiency of funded schemes will be enhanced by robust evidence which documents as to whether schemes achieve objectives, what works well and the main challenges they face.

In India, evaluation is not routine, even of large costly public health care programmes. Nevertheless, some assessments have been carried out, for example of the Yeshasvini Co-operative Farmers Health Care Scheme of Karnataka, the longest running state-supported health insurance scheme for the informal sector in India<sup>9</sup>, with promising results in terms of increased utilization of and reduced borrowing for health care services<sup>10</sup>. However, these early models covered small populations and offered limited benefits, so that the policy implications of conclusions drawn from even the best evaluations were unclear.

This scenario has changed during the past 5 years, with the launch of 2 schemes, the Rajiv Aarogyasri<sup>11</sup> Community Health Insurance Scheme (Aarogyasri) of Andhra Pradesh (AP) and Rashtriya Swasthya Bima Yojana (RSBY) currently offered in 30 states and union territories of India<sup>12</sup> including AP's neighbouring state of Maharashtra (MH). Their scale in terms of population coverage and range of treatments offered, significantly enhances their potential to inform India's road map towards universal health coverage. Both schemes belong to the new generation of publicly funded government-sponsored health insurance schemes, principally aimed at providing financial protection to the poor against catastrophic health shocks, which, for these schemes, the Government has defined as inpatient hospital care<sup>9</sup>. Both schemes have been subject to some assessment in their early phases, but a recent editorial<sup>13</sup> highlighted the necessity of further and repeated evaluations to enhance the credibility and accountability of existing schemes and to identify those which deserve scale-up. The Aarogyasri and RSBY schemes and the other recent health sector innovations in AP and



1  
2  
3 Maharashtra which form the major backdrop and complex health care architecture against which  
4 these have been launched, and which may have contributed to the changes in outcomes we have  
5 explored in our study, are described below.  
6

#### 7 *The Rajiv Aarogyasri Health Insurance Scheme of AP*

8 In 2007 AP launched a pioneering new state-wide fully state-funded health insurance scheme, the  
9 Rajiv Aarogyasri Community Health Insurance Scheme (Aarogyasri)<sup>11</sup> to provide treatment for  
10 serious and life-threatening illnesses. The specific objectives include: to improve access of poor  
11 families to quality medical care (meaning low-frequency, high cost specialist care) and treatment of  
12 identified diseases requiring hospitalisation through an identified network of health care providers,  
13 to provide financial cover for catastrophic illnesses which have the potential to wipe out life time  
14 savings of poor families and to provide 'universal coverage to the urban and the rural poor in the  
15 state'<sup>14</sup> albeit for the conditions covered in the benefits package. All families with a 'below poverty  
16 line' (BPL) ration card, i.e. those on an annual income below USD 1384 (INR 75,000) in urban areas  
17 and USD 1107 (INR 60,000) in rural areas, and including individuals with pre-existing medical  
18 conditions are *automatically* enrolled and the scheme was estimated to cover approximately 20.4  
19 million poor and lower middle class families, comprising about 85 percent of the state's population  
20 in 2009<sup>9</sup>. Enrollees make no contribution, the annual benefit is a maximum of USD 4,500 (INR  
21 200,000) per family per year and there is no limit on the size of the family<sup>14</sup>. A total of 942 medical  
22 and surgical procedures across 31 clinical specialties<sup>14</sup> are provided and the benefits include all  
23 inpatient costs - associated investigations, food, transport and medicines for 10 days following  
24 discharge. One year follow-up packages including consultation, medicines, and diagnostics are also  
25 available for 125 procedures requiring longer periods of follow up<sup>9</sup>. Aarogyasri has unique features  
26 including *Aarogyamithras* (health system navigators), outreach *health camps* delivered by  
27 participating hospitals to educate, screen and case-find and a state-of-the-art information  
28 technology-based management system. At the time of this study, 353 public and private sector  
29 hospitals were 'empanelled' to provide services to Aarogyasri beneficiaries.  
30  
31

32  
33 In 2009, a descriptive study of *Aarogyasri*, based on an analysis of claims data and a survey of  
34 beneficiaries<sup>15</sup>, concluded that while the scheme was beginning to reach its intended beneficiaries  
35 uptake was lower among scheduled castes and tribes. This was confirmed by Fan and colleagues<sup>16</sup>,  
36 who used variations in programme roll-out over time and districts to evaluate the scheme using  
37 National Sample Survey data collected before and after its launch. They reported reduced out-of-  
38 pocket expenditure in this initial phase but no major impact on catastrophic healthcare expenditure.  
39 Inspired by Aarogyasri and mindful of the political benefits of introducing popular health reforms,  
40 other states have launched health financing innovations similar to this model.  
41

#### 42 *RSBY in Maharashtra*

43  
44 RSBY was launched across a number of states by the Ministry of Labour, Government of India (GOI)  
45 in 2008<sup>17</sup> and provides access to free inpatient hospital care up to USD 550 (INR 30,000) per family  
46 per year<sup>18</sup>. Households which meet the criteria based on the much more limiting definition of  
47 poverty and numbers of poor families provided for each State by the GOI Planning Commission are  
48 eligible to enrol, and pay a contribution of USD 0.55 (INR 30) at registration and at each annual  
49 renewal<sup>9</sup>. Up to 5 family members, including those with pre-existing conditions can be covered, and  
50 personal information including biometric data are collected prior to the issue of a smart card with  
51 encoded details of the family. 700 procedures covering 18 broad categories of interventions which  
52 would generally be included under the umbrella of 'secondary' care, are provided and the benefit  
53 packages include the intervention, public transport costs limited to 1.8 USD (INR 100) per visit and  
54 18.2 USD (INR 1000) per year and post-hospitalization drugs for 5 days. Networked hospitals are  
55 required to provide free outpatient consultations (which have only recently been introduced.  
56 Personal communication, Kurian OC) but other costs such as ambulatory diagnostics and medicines  
57  
58  
59  
60

1  
2  
3 have to be borne by the beneficiaries, except if investigations lead to inpatient admissions within a  
4 day<sup>9</sup>. A pilot of the RSBY scheme was launched in 1 district of AP, but only after the start of our  
5 household survey.  
6

7  
8 In Maharashtra, enrolment began in Aug 2009, and by mid 2013, approximately 2 million of the  
9 eligible 4 million families were enrolled in the scheme<sup>12</sup> which is being implemented in 31 of 35  
10 districts in the state. Enrolment had extended to 26 districts prior to June 2012, when our household  
11 survey began. Notably, only 15 out of 1215 hospitals contracted for RSBY funded services are from  
12 the public sector<sup>12</sup>. Early assessments of the scheme's impact nationally, suggest that although the  
13 rate of hospitalisations has increased, awareness of the scheme was poor and remains a barrier to  
14 uptake. Notable variations in enrolment and scheme awareness were also observed by a descriptive  
15 study of RSBY conducted in the Amravati district of Maharashtra which has a large tribal  
16 population<sup>19</sup>. In Maharashtra<sup>17</sup>, utilisation rates have been reported to be lower than in other states  
17 and the male:female enrolment ratio is 6.5:3.5.  
18

#### 19 *Other major health sector initiatives in AP and Maharashtra*

20 Both states have a complex health care landscape with numerous programmes in place. There are  
21 several initiatives launched during the past decade, some of which are common to both states and  
22 driven by national strategies, and others owe their existence to state-level enterprise, innovation  
23 and political support. The most notable programmes with the potential to impact on in patient care  
24 are described below.  
25

26  
27 The National Rural Health Mission (NRHM) was launched in 2005 nationwide, with a key aim of  
28 reducing maternal and infant mortality<sup>20</sup>. Government reports suggest that its notable achievements  
29 include an increase in institutional deliveries; in AP from 1.25 million in 2005-06 to 1.46 million by  
30 2011-12<sup>21</sup> and in MH from 1.1 million to 1.63 million<sup>22</sup>, achieving an institutional delivery rate of  
31 approximately 92 percent in both states. Also common to both states is the '104 health information  
32 help line' launched in AP in 2008 and MH in 2011<sup>23</sup>, to provide medical advice and information based  
33 on validated algorithms and disease summaries, direct callers to appropriate health facilities or to  
34 receive a complaint against a public sector health facility. In AP the help line and call centre were  
35 subsumed within the Aarogyasri infrastructure by 2011.  
36

37  
38 In MH, the RSBY was preceded by the Jeevandayee scheme launched in 1997 with the objective of  
39 reducing catastrophic OOPE on inpatient care in the BPL population<sup>24</sup>. Potential beneficiaries were  
40 required to apply for funding after a diagnosis was confirmed and the scheme covered serious illness  
41 such as cardiac and renal disease and cancer. However, the scheme uptake has been low, and while  
42 it has continued to run in parallel to the RSBY, only 66,853 procedures (4456 procedures per year in  
43 a state with 112.37 million people) have been approved during the scheme's lifetime<sup>25</sup>. Since 2006,  
44 MH has also had a scheme in place which mandated 20% of the beds in private hospitals to be made  
45 available for free or at subsidized rates to poor patients (personal communication, Kurian OC). It has  
46 been estimated that around 10,000 private beds are available for the poor across MH, equivalent to  
47 approximately 20% of the total bed capacity of the public sector. Although the implementation of  
48 the scheme is reported to be erratic (Kurian OC), it may have had some positive impact on access to  
49 hospital inpatient care for serious illness.  
50

51  
52 Launched in 1995-96, the Navasanjeevani Yojana scheme is exclusive to the 15 tribal districts of MH  
53 and was to improve maternal and infant mortality in these vulnerable populations<sup>26</sup>. It has focused  
54 on strengthening primary health and nutrition services and access to safe drinking water.

55  
56 A service available in AP but not in MH is the '108' scheme, launched in 2005 to provide a state-of-  
57 the-art medical emergency response service<sup>27</sup>. At the time of our study, 802 ambulances catered to  
58 approximately 3,500 emergencies per day<sup>28</sup>.  
59  
60

## OBJECTIVES OF THE STUDY

Our objective was to compare the effects of health innovations over time on access to and OOPE on inpatient care in AP and MH and to assess whether the AP initiatives had larger or smaller beneficial effects than those found in MH. These differential effects are likely to be substantially due to the Aarogyasri scheme in AP and the RSBY in MH. In this paper, we report findings from a study which compared these changes. The findings do not allow us to draw inferences on the impacts of individual initiatives, but nevertheless contribute new knowledge on the impact and role of the innovations, provide lessons for other programmes, and strengthen the evidence base for policy on UC in India.

## METHODS

### Overview

None of the aforementioned initiatives – including the Aarogyasri and RSBY schemes in which we are especially interested – was piloted in a systematic way, let alone via a carefully designed randomized control trial. Following MRC Guidance<sup>29,30</sup> and best practice we therefore opted for a cross-sectional survey design in which we seek to minimise selection bias, to control for confounding variables and to reduce the effects of chance. Specifically, we compare changes in hospital inpatient care related expenditures and behaviours (HREB) in AP and MH before and after the rollout of the Aarogyasri scheme in AP and the RSBY scheme in MH. The difference in changes between AP and MH is not an estimate of a specific initiative. Rather it tells us whether, on balance, the AP initiatives have had larger (or smaller) beneficial effects than the MH initiatives, and if so how much more (or less) beneficial they have been. Since the NRHM was common to both states and the MH-specific initiatives were quite small in scale or unlikely to affect HREBs, any difference in change between the two states is quite likely to be mainly due to differential effects of the Aarogyasri and RSBY programmes.

AP and MH have a broadly similar development profile as shown by the data below. AP's other socio-economically similar neighbouring states of Karnataka and Tamil Nadu had already introduced Aarogyasri-like schemes, and Odisha and Chattisgarh the only other neighbours, had comparatively higher levels of socio-economic deprivation. HREBs were measured in both AP and MH by two waves of household survey before (2004) and after (2012) the introduction of Aarogyasri and RSBY. The study protocol and questionnaire for the 2012 survey were reviewed and agreed by the Research Ethics Committee of the Administrative Staff College of India, Hyderabad.

| Maharashtra | Indicator                                                   | Andhra Pradesh |
|-------------|-------------------------------------------------------------|----------------|
| 112.37      | Population (2011 census, in millions)                       | 84.66          |
| 10.20       | % Schedule Caste ( 2001 Census)*                            | 16.60          |
| 8.90        | % Schedule tribe ( 2001 census)*                            | 6.20           |
| 101,314     | Per capita income 2011-12 (in INR)**                        | 71,540         |
| 35          | Number of districts                                         | 23             |
| 5,314       | Households covered in NSSO 60 <sup>th</sup> round (2004-05) | 5,059          |
| 10,073      | Households covered in the study 2012                        | 8,623          |

\*Note that 2011 census data for social groups are not yet published

\*\*Source: Presentation on Annual Plan 2012-13 and Five Year Plan 2012-17<sup>31</sup>

### Survey design

#### Baseline Survey : 2004

We used the original data from the National Sample Survey Organization (NSSO) 60<sup>th</sup> decennial round household survey undertaken in 2004<sup>32</sup> to estimate baseline HREB estimates for AP and MH (Table 1). This was the most recent round measuring morbidity profiles, use of health care services including hospitalised and non-hospitalised treatments and expenditures incurred. The household survey used a multi-stage stratified sampling methodology to identify a representative random population sample and an interviewer completed questionnaire to obtain measures of HREB along with socio-demographic, household expenditure and other information.

#### Follow up survey: 2012

We used the same household survey design and methods to collect post-intervention data in AP and MH as those used by NSSO. Briefly, the household survey used a multi-stage stratified sampling methodology with the 'First Stage Units' (FSUs) identical to those used by NSSO in their 66th round (2008-09)<sup>33</sup>, the latest round for which FSUs had been mapped. However, the FSUs were not the same as those in NSSO 2004, our baseline survey, rapid urbanisation having changed substantially, the urban-rural landscape of both states and thus the geographical basis for sampling units.

**Table 1: Urban and rural populations and households surveyed in 2004 and 2012 in Andhra Pradesh and Maharashtra**

|                                   | Andhra Pradesh             |                    | Maharashtra                |                    |
|-----------------------------------|----------------------------|--------------------|----------------------------|--------------------|
|                                   | NSSO 60th round<br>2004-05 | Our survey<br>2012 | NSSO 60th round<br>2004-05 | Our survey<br>2012 |
| Population                        | 76,210,007*                | 84,665,533**       | 96,878,627*                | 112,372,972**      |
| Urban population                  | 20,808,940*                | 28,353,745**       | 41,100,980*                | 50,827,531**       |
| Rural population                  | 55,401,067*                | 56,311,788 **      | 55,777,647*                | 61,545,441**       |
| Total households (urban)          | 4,397,138*                 | 6,778,225**        | 8,403,224*                 | 10,813,928**       |
| Total households (rural)          | 12,607,167*                | 14,246,309**       | 11,173,512*                | 13,016,652**       |
| Total households                  | 17,004,305*                | 21,024,534**       | 19,576,736*                | 23,830,580**       |
| FSUs (urban)                      | 183                        | 372                | 267                        | 504                |
| FSU (rural)                       | 325                        | 491                | 265                        | 504                |
| Total households surveyed (urban) | 1824                       | 3715               | 2664                       | 5038               |
| Total households covered (rural)  | 3235                       | 4908               | 2650                       | 5035               |

\*2001 census \*\* 2011 census

FSU - First Stratum Unit

The NSSO 66th round had 492 rural FSUs in AP, but 1 FSU was found to be uninhabited.

1  
2  
3  
4  
5  
6  
7  
8  
9  
10 The interviewer completed household survey questionnaire was pre-tested and then piloted in both  
11 states prior to the survey. All respondents provided written informed consent for participation.  
12 Questions addressed the following: household composition and socio-demographic characteristics  
13 of members, household expenditure, and health expenditure (outpatient and inpatient) and means  
14 of its financing, healthcare seeking behaviour, factors affecting access to healthcare and awareness  
15 and perceptions of the quality of the *Aarogyasri* scheme (AP only). The survey questions in 2012  
16 were identical to those from the NSSO 2004<sup>34</sup>. Additional questions specific to the *Aarogyasri* and  
17 other relevant schemes were also added.  
18

19 A survey of 18696 households across 2 states and 1871 locations within the states is a challenging  
20 undertaking. The survey design had several features intended to assure the quality of data collected.  
21 Few academic institutions have internal capacity to carry out such large surveys, and consequently,  
22 the Social and Research Institute of IMRB International, a leading market research agency was  
23 selected to carry out the survey. The Institute has field survey teams based in every Indian state,  
24 conversant in local languages and dialects and trained to carry out surveys in the socio-economic  
25 development sector. Its clients include Government of India (for whom the national Family Health  
26 Survey data are collected), World Bank and other UN organisations. A group of NSSO consultants in  
27 AP and the Indian Socioeconomic Research Unit, Pune were recruited to support the training of the  
28 field survey teams and data verification.  
29

30 We planned three levels of verification of the study data; the first to be undertaken by the survey  
31 agency, the second to be carried out by the study team and the third, by the agencies mentioned  
32 above. Survey teams for each district were accountable to a field supervisor who was responsible for  
33 checking both the household listing and data entry on a daily basis. The study team also  
34 accompanied the field staff to survey sites on a regular basis. Data collected from 250 households in  
35 each state (approximately 2.5% of the surveyed households) and 186 of the FSU listings  
36 (approximately 10%) were independently verified by the agencies in both the villages and urban  
37 blocks in order to ensure that the sampling method and administration of the questionnaire survey  
38 were being correctly applied. The data entry was carried out by the Institute using a double entry  
39 method and any questionnaires reported incorrect were sent back to the field for re-survey. The  
40 research team carried out a final validation and review of the data.  
41  
42

#### 43 *Outcome measures*

44  
45 *Average inpatient (IP) expenditure per household per year.* Average out-of-pocket expenditure for  
46 inpatient care during 1 year prior to the survey was estimated from questionnaire responses for AP  
47 and MH from both baseline and follow-up data. Reimbursements for inpatient expenditure were  
48 deducted from the total where households had received them.  
49

50  
51 *Large out-of-pocket inpatient expenditure.* Because of the limited data on household consumption in  
52 the 2004 NSSO health survey we did not estimate 'catastrophic health expenditure'. Instead, we  
53 constructed a measure of 'large' out-of-pocket expenditure. The *Aarogyasri* Health Care Trust data  
54 on expenditure incurred by the Government of AP per case in 2012 were examined<sup>14</sup> and the mean  
55 was estimated as USD 419 (INR 23,000). A household was deemed to have incurred 'large'  
56 expenditure if OOPE for inpatient care was equal to or greater than this threshold.  
57  
58  
59  
60

*Large borrowing.* We estimated the total amount borrowed by a household to meet the expenditure of all the inpatient episodes of that family during the previous year. A household was considered to have incurred 'large borrowing' if the borrowing was equal to or exceeded the BPL threshold set by Government of AP: INR 70000 for urban families and INR 65000 for rural households. These prices have been deflated to 2004 levels.

*Hospitalisation rate.* This was estimated as the number of individuals hospitalised during the previous year, per 1000 population.

Variations in outcomes were examined between male and female-headed households, and rural and urban populations, as well as across social groups and economic groups represented by asset quintiles.

Because of the limited data on household consumption in the 2004 NSSO health survey which made the estimation of wealth difficult, we have opted instead to measure household living standards using an asset or wealth index based on information on ownership of household durables, dwelling type, etc., using principal component analysis to estimate weights<sup>35, 36,37</sup> for each indicator. The indicators used were limited to those collected in the 2004 NSSO: type of structure of the dwelling unit, type of toilet, type of fuel used for cooking and source of drinking. Data from the 2004 and 2012 surveys were pooled so that the index captures changes in living standards between the two years; there are therefore more households in the top quintile in 2012 than in 2004. The statistical software Stata 11 was used to generate the index.

*Deflation of follow-up expenditure estimates.*

The 2012 expenditure data including the threshold for large expenditures were deflated using the consumer price index of the Government of India<sup>38</sup> to reflect 2004 prices.

*Analysis*

Our repeat cross-sectional surveys do not allow estimation of within-individual household changes in outcomes over time. Our analysis therefore focused on estimating outcomes averaged across states, and in comparing changes in these over time between AP and MH. If we assume that outcome determinants other than Aarogyasri and RSBY remained stable in the two states over time or followed a parallel change, then a difference-in-differences (DID) analysis will uncover the net effect of Aarogyasri over and above RSBY.

The difference in differences of outcome ( $Y_{DD}$ ) is

$$(Y_{2012}^{AP} - Y_{2004}^{AP}) - (Y_{2012}^{MH} - Y_{2004}^{MH})$$

where the subscripts and superscripts for Y refer to the respective states and the years when the surveys were done. Confidence intervals were calculated from the standard error  $Y_{DD}$  of and the p-value for the null-hypothesis ( $Y_{DD} = 0$ ) was tested using the Wald test as  $t = \frac{Y_{DD}}{SE_{Y_{DD}}}$  with one degree of freedom.  $Y_{DD}$  was estimated using ordinary least square regression:

$$y_{it} = \beta_0 + \beta_1 state_i + \beta_2 survey_t + \beta_3 (state * survey)_{it} + \sum_{k=1}^m \beta_{3+k} covariate_k + \varepsilon$$

The basic DID results are obtained using the above regression with covariates excluded. The adjusted DID results are obtained using the above regression with m=9 covariates, namely the gender of head of household, a dummy variable capturing whether the household lives in a rural or urban location, three dummy variables capturing the household's social group (the lowest is the excluded category),



and four asset quintile dummies (the bottom is the excluded category). In the regression  $y_{it}$  is the outcome, *state* is a dummy variable with 0 for MH and 1 for AP, and *survey* is a dummy variable with 0 for 2004 survey and 1 for 2012 survey. The coefficient for the interaction term,  $\beta_3$ , gives the differences in differences estimate,  $Y_{DD}$ . Robust standard errors of  $Y_{DD}$  were calculated to account for clustering of households within FSUs using Stata survey commands. A positive value for  $Y_{DD}$  suggested that the change in the outcome in AP was more than the change in MH and the negative value would suggest the reverse.

An advantage of regression based DID estimate is this ability to use co-variables which can account for differential trajectories in the two states. In addition to this we did sub-group analysis stratifying for different co-variables. This is particularly relevant in the case of scheduled tribes whose proportion increased in MH in the follow up survey.

Sub groups were not mutually adjusted for the analysis due to sample size restrictions in relation to some of them.

#### *Role of the funding sources*

The external funding sources had no role in study design, data collection, analysis, interpretation or reporting, or in submission decision.

## RESULTS

A total of 5314 and 5059 households from Maharashtra and AP were surveyed by the NSSO in 2004 (Table 2). Our survey in 2012 included 10073 (MH) and 8623 (AP) households.

**Table 2. Socio-demographic characteristics of baseline and follow-up samples**

| Subgroups                | Number (%) of Households 2004 |                | Number (%) of Households 2012 |                |
|--------------------------|-------------------------------|----------------|-------------------------------|----------------|
|                          | Maharashtra                   | Andhra Pradesh | Maharashtra                   | Andhra Pradesh |
| <b>All</b>               | 5314                          | 5059           | 10073                         | 8623           |
| <b>Head of Household</b> |                               |                |                               |                |
| Male                     | 4785 (90.0)                   | 4433(87.6)     | 8543(84.8)                    | 7418(86.0)     |
| Female                   | 529 (10.0)                    | 626 (12.4)     | 1530 (15.2)                   | 1205 (14.0)    |
| <b>Social Group</b>      |                               |                |                               |                |
| Scheduled Tribes         | 413 (7.8)                     | 296 (5.9)      | 1364 (13.5)                   | 883 (10.2)     |
| Scheduled Castes         | 809 (15.2)                    | 974 (19.3)     | 2235 (22.2)                   | 1797 (20.8)    |
| Other Excluded           | 1644 (30.9)                   | 2317 (45.8)    | 1899 (18.9)                   | 3419 (39.7)    |

|                       |              |              |              |              |
|-----------------------|--------------|--------------|--------------|--------------|
| All other Groups      | 2448 (46.1)  | 1472 (29.1)  | 4571 (45.4)  | 2524(29.3)   |
| <b>Location</b>       |              |              |              |              |
| Rural                 | 2,650 (49.9) | 3235 (63.9)  | 5035(50.0)   | 4908 (57.0)  |
| Urban                 | 2664 (50.1)  | 1824 (36.1)  | 5038 (50.0)  | 3715(43.0)   |
| <b>Asset Quintile</b> |              |              |              |              |
| Lowest                | 1,260 (23.7) | 1,594(31.5)  | 996(9.9)     | 826(9.6)     |
| Second                | 1,016 (19.1) | 1,237 (24.5) | 1,841(18.2)  | 1,286(14.9)  |
| Third                 | 772 (14.5)   | 753(14.9)    | 2,228(22.1)  | 2,121(24.60) |
| Fourth                | 857 (16.1)   | 744(14.7)    | 2,373 (23.6) | 3,072(35.6)  |
| Fifth                 | 1,408(26.5)  | 730(14.4)    | 2,633(26.1)  | 1,318(15.3)  |

### Changes in average in-patient expenditure

Table 3 (top panel) shows average baseline levels of inpatient expenditure. The table also shows the real terms change (deflated to 2004 prices) in these outcomes at follow up and the difference in differences (DID) estimate comparing AP with MH. DID estimates for overall results are shown unadjusted, as well as adjusted for the effects of the covariates. Breakdowns by sex of head of household, social group, urban/rural location and asset quintiles are also shown.

Overall, average inpatient expenditure increased in real terms in both the states between 2004 and 2012, but the increase was significantly greater in MH (unadjusted DID= -498.2 INR, 95% CI= -792.9: -203.5, p=0.0009). The direction in terms of a greater increase in MH was evident across all sub groups of analysis except the richest asset quintile. However, the DID estimates reached significance in male headed households (DID=-513.7INR, 95% CI= -843.9: -183.4, p=0.0023), scheduled castes (DID= -708.7INR, 95% CI=-1234.3: -183.2, p=0.0082), all 'other' social groups (DID=-1110.46INR, 95% CI=-1868 : -352.9, p=0.0041), rural households (DID= -504 INR, 95% CI= -801.9: -206.0, p=0.0009) and the poorest (DID= -1001.3 INR, 95% CI= -1751: -251.7, p= 0.0089) and middle asset quintiles (DID= -798.1 INR, 95% CI= -1362.9:-233.3, p= 0.0056).

**Table 3: Change in average inpatient expenditure (in INR) in Maharashtra and Andhra Pradesh between 2004 and 2012**

| Subgroups                              | Baseline Mean (95% CI) |                    | Change 2004:2012 Mean (95% CI) |                      | DID                                  |        |
|----------------------------------------|------------------------|--------------------|--------------------------------|----------------------|--------------------------------------|--------|
|                                        | Maharashtra            | Andhra Pradesh     | Maharashtra                    | Andhra Pradesh       | Mean (95%CI)                         | p      |
| <b>Household inpatient expenditure</b> |                        |                    |                                |                      |                                      |        |
| <b>All</b>                             | 1091.6(978.4:1204.8)   | 723.5(527.5:919.5) | 942.8(749.9:1135.6)            | 444.55(221.5: 667.6) | -498.2(-792.9:-203.5)                | 0.0009 |
|                                        |                        |                    |                                |                      | <b>DID (adjusted for covariates)</b> |        |
|                                        |                        |                    |                                |                      | -565.8(862.9: -268.6)                | 0.0002 |



| Head of Household   |                         |                      |                       |                        |                        |        |
|---------------------|-------------------------|----------------------|-----------------------|------------------------|------------------------|--------|
| Male                | 1,132.9(1015:1,251)     | 758(419.7:1,096.3)   | 935(727:1,143.01)     | 1074.9(555.9:1593.8)   | -513.7(-843.9:-183.4)  | 0.0023 |
| Female              | 757.1(555.5:1014.6)     | 341.1(222.3:460.01)  | 421.3(164.7:678.0)    | 589.9(307.22:872.8)    | -484.9(-1075.6:105.9)  | 0.1076 |
| <b>Social Group</b> |                         |                      |                       |                        |                        |        |
| Scheduled Tribes    | 376.6(231.7:521.6)      | 432.7(212.52:652.9)  | 1153.1(803.3:1502.9)  | 675.2(163.2:1187.2)    | -477.9(-1097.7:142)    | 0.1307 |
| Scheduled Castes    | 696.7(500.2:893.2)      | 432.6(305.6:559.4)   | 1464.1(1039.9:1888.4) | 755.4(444.9:1065.9)    | -708.7(-1234.3:-183.2) | 0.0082 |
| Other Excluded      | 1,028.6(838.4:1218.8)   | 562.4(463.7:662)     | 928.9(532.9:1324.9)   | 767.9(569.6:966.2)     | -161(-603.7:281.7)     | 0.4758 |
| All other Groups    | 1,424.5(1,222.3:1626.7) | 1306.2(627.8:1984.6) | 734.9(427.9:1041.7)   | -375.6(-1,068.5:317.4) | -1110.46(-1868:-352.9) | 0.0041 |
| <b>Location</b>     |                         |                      |                       |                        |                        |        |
| Rural               | 897.8(768.1:1027.5)     | 571.4(496.2:646.6)   | 1084.7(826.3:1343.1)  | 580.7(432.2:729.2)     | -504(-801.9:-206.0)    | 0.0009 |
| Urban               | 1343.5(1146.1:1540.9)   | 1113.5(466.2:1760.8) | 753.6(458.7:1048.6)   | 92.3(-586.92:771.5)    | -661.3(-1401.5:78.864) | 0.0799 |
| <b>Quintile</b>     |                         |                      |                       |                        |                        |        |
| poorest             | 656.3(498.0:814.6)      | 391.5(319:464.1)     | 1692.5(1053.3:2331.7) | 691.2(298.9:1083.5)    | -1001.3(-1751:-251.7)  | 0.0089 |
| 2nd                 | 786.5(583.5:989.5)      | 443.3(356.5:530.2)   | 979.3(599.4:1359.2)   | 839.5(465.7:1213.3)    | -139.8(-672.5:393)     | 0.607  |
| middle              | 1062.7(738.8:1386.1)    | 862.1(577.8:1146.5)  | 1011.8(550.2:1473.4)  | 213.7(-112.1:539.6)    | -798.1(-1362.9:-233.3) | 0.0056 |
| 4th                 | 1241.7(894.4:1589.1)    | 1819(337.5:3302.5)   | 803.6(328.7:1278.5)   | -644.3(-2128.3:839.7)  | -1447.9(-3005.2:109.5) | 0.0684 |
| richest             | 1818.6(1505.5:2131.8)   | 908.3(682.1:1133.4)  | 252.3(-193.4:698.1)   | 362.1(15.3:708.9)      | 109.7(-454.80:674.3)   | 0.7031 |

### Large expenditures for inpatient care

Proportions of households incurring large expenditures showed an increase in both states (Table 4), but the increase was smaller in AP for the sample as a whole as well as for all the groups except for the second asset quintile. The DID was strongly significant for the households overall (adjusted DID=-1.8, 95% CI: -3:-0.7, p= 0.0009), but this was not observed for any of the sub groups of analysis.

**Table 4: Change in the proportion (%) of households incurring large health expenditures for inpatient care in Maharashtra and AP between 2004 and 2012**

| Subgroups | Baseline Mean (95% CI) | Change 2004:2012 Mean (95% CI) | DID |
|-----------|------------------------|--------------------------------|-----|
|-----------|------------------------|--------------------------------|-----|

|                                                                  | Maharashtra    | Andhra Pradesh | Maharashtra    | Andhra Pradesh    | Mean (95%CI)                         | p      |
|------------------------------------------------------------------|----------------|----------------|----------------|-------------------|--------------------------------------|--------|
| <b>Large IP expenditure (INR 23000 deflated to 2004 figures)</b> |                |                |                |                   |                                      |        |
| <b>All</b>                                                       | 6.7(6.7:7.3)   | 3.4(2.9:3.9)   | 3.1(2.1:4.1)   | 2.2(1.5:2.8)      | -0.91(-2.1:0.27)                     | 0.1302 |
|                                                                  |                |                |                |                   | <b>DID (adjusted for covariates)</b> |        |
|                                                                  |                |                |                |                   | -1.8(-3:-0.7)                        | 0.0009 |
| <b>Head of Household</b>                                         |                |                |                |                   |                                      |        |
| Male                                                             | 6.8(6.2:7.6)   | 3.5(3.1:4)     | 3.1(2.0:4.1)   | 2.1(1.5:2.9)      | -0.8(-2.1:-0.4)                      | 0.1928 |
| Female                                                           | 5.0(3.7:6.4)   | 2.8(1.9:3.7)   | 3.9(2:5.8)     | 2(6.6:3.4)        | -1.8(-4.2:0.50)                      | 0.1222 |
| <b>Social Group</b>                                              |                |                |                |                   |                                      |        |
| Scheduled Tribes                                                 | 2.2(1.3:3.1)   | 1.4(0.5:2.2)   | 5.3(3.5:7)     | 3.5(1.9:5.1)      | -1.7(-4.1:0.61)                      | 0.1478 |
| Scheduled Castes                                                 | 6.1(4.6:7.7)   | 2.1(1.5:2.6)   | 4.3(2.3:6.3)   | 3(1.9:4.1)        | -1.2(-3.5:1.01)                      | 0.2785 |
| Other Excluded                                                   | 5.9(4.7:7.0)   | 3.3(2.7:3.8)   | 2.9(1.1:4.6)   | 2.7(1.7:3.6)      | -2.1(-2.2:1.8)                       | 0.8389 |
| All other Groups                                                 | 8.3(7.5:7.9)   | 5.4(4.4:6.3)   | 2.2(0.9:3.6)   | 0.51(-0.7:1.7)    | -1.7(-3.5:0.04)                      | 0.0628 |
| <b>Location</b>                                                  |                |                |                |                   |                                      |        |
| Rural                                                            | 1.9(1.5:2.2)   | 0.9(0.79:1.1)  | 1.7(1.1:2.3)   | 1.3(0.09:1.6)     | -0.45(-1.1:0.25)                     | 0.2098 |
| Urban                                                            | 12.9(11.9:14)  | 9.7(8.9:10.7)  | 4.4(3.0:5.7)   | 3.9(2.6:5.3)      | -0.7(-2.4:1.5)                       | 0.6350 |
| <b>Quintile</b>                                                  |                |                |                |                   |                                      |        |
| poorest                                                          | 1.8(1.3:2.4)   | 1.1(0.8:1.4)   | 3.7(2.2:5.2)   | 1.7(0.7:2.7)      | -0.2(-3.8:-0.19)                     | 0.0307 |
| 2nd                                                              | 2.7(1.9:3.5)   | 1.2(0.9:1.5)   | 2.1(0.93:3.3)  | 2.2(1.4:3.1)      | 0.9(-1.4:1.6)                        | 0.9079 |
| middle                                                           | 6.9(4.9:8.9)   | 4.2(3.1:5.3)   | 1.3(-1:3.6)    | 0.9(-1.2:1.4)     | -1.2(-3.9:1.4)                       | 0.3596 |
| 4th                                                              | 10.7(8.7:12.6) | 7.6(5.9:9.2)   | 1.8(-0.57:4.3) | -0.036(-1.9:1.80) | -1.9(-4.9:1.2)                       | 0.2268 |
| richest                                                          | 13.5(12:14.9)  | 9.6(8.1:11.2)  | 0.3(-1.6:2.2)  | -0.6(-2.8:1.6)    | -0.9(-3.7:2)                         | 0.5601 |

### Changes in large borrowing for inpatient care

In both states proportions of households incurring large borrowings to meet inpatient expenses increased from 2004 to 2012 (Table 5). However, there was a consistent pattern of smaller increases in AP for the overall population, as well as all subgroups (except the richest asset quintile) with DID's strongly significant for the overall population (adjusted DID=-4, 95% CI: -6.6:-1.4, p= 0.0032), scheduled tribes (DID= -5.5, 95% CIs:-9.3:-1, p= 0.0048), rural households (DID= -4.7, 95% CIs: -7.3 : -2.1, p= 0.0007) and all asset quintiles except the richest (the poorest asset quintile DID= -9.0, 95% CI: -14.0: -4.4, p=0.0002).

**Table 5: Change in the proportion (%) of households large borrowings for in-patient care in Maharashtra and AP between 2004 and 2012**

| Subgroups                                               | Baseline Mean (95% CI) |                | Change 2004:2012 Mean (95% CI) |                | DID               |        |
|---------------------------------------------------------|------------------------|----------------|--------------------------------|----------------|-------------------|--------|
|                                                         | Maharashtra            | Andhra Pradesh | Maharashtra                    | Andhra Pradesh | Mean (95%CI)      | p      |
| <b>Proportion of households having large borrowings</b> |                        |                |                                |                |                   |        |
| <b>All</b>                                              | 7.5(6.7:8.2)           | 3.8(3:4.5)     | 8.9(6.8:11)                    | 5.3(3.4:7.2)   | -3.7(-6.4:-0.908) | 0.0100 |

|                          |                    |                    |                     |                     | DID (adjusted for covariates) |        |
|--------------------------|--------------------|--------------------|---------------------|---------------------|-------------------------------|--------|
|                          |                    |                    |                     |                     | -4(-6.6:-1.4)                 | 0.0032 |
| <b>Head of Household</b> |                    |                    |                     |                     |                               |        |
| Male                     | 7.8(7.0:8.5)       | 3.9(3.1:4.7)       | 9.8(6.6:1.3)        | 5.3(3.3:7.3)        | -3.6(-6.6:-0.62)              | 0.0187 |
| Female                   | 5(3:7)             | 2.9(1.7:4.1)       | 8.(6.6:11.2)        | 5(2.9:7.23)         | -4.7(-8.3:-1)                 | 0.0137 |
| <b>Social Group</b>      |                    |                    |                     |                     |                               |        |
| Scheduled Tribes         | 3.6(2.3:4.9)       | 2.4(0.93:3.9)      | 11(8.9:14)          | 5.8(2.8:8.8)        | -5.5(-9.3:-1.8)               | 0.0048 |
| Scheduled Castes         | 7.2(5.5:8.8)       | 3(1.7:4.2)         | 9.6(6.6:13)         | 5.8(3.4:8.3)        | -3.8(-7.5:0.03)               | 0.0518 |
| Other Excluded           | 8.0(6.8:9.2)       | 3.5(2.7:4.4)       | 8(5.8:10.3)         | 5.3(3.2:7.4)        | -2.8(-5.7:0.19)               | 0.0661 |
| All other Groups         | 8(7.15:8.8)        | 0.052(.040:0.064)  | 8.8(5.9:12)         | 4.7(2.2:7.4)        | -4.1(-7.9:-.4.0)              | 0.0302 |
| <b>Location</b>          |                    |                    |                     |                     |                               |        |
| Rural                    | 6.5(5.6:7.5)       | 0.03(0.024:0.038)  | 10(8.5:12)          | 5.8(3.9:7.6)        | -4.7(-7.3:-2.1)               | 0.0007 |
| Urban                    | 8.7(7.3:10)        | 0.056(0.048:0.064) | 7.0(4.5:9.5)        | 4(1.1:6.9)          | -3.0(-6.7:0.68)               | 0.1081 |
| <b>Quintile</b>          |                    |                    |                     |                     |                               |        |
| poorest                  | 5.2(3.9:6.5)       | 0.025(0.016:0.033) | 12.1(7.8:16)        | 3.1(1.3:0.049)      | -9(-14:-4.4)                  | 0.0002 |
| 2nd                      | 0.064(0.048:0.08)  | 0.027(0.021:0.032) | 0.095(0.070:0.12)   | 0.052(0.034:0.070)  | -0.043(-.073:-.013)           | 0.0062 |
| middle                   | 0.074(0.050:0.098) | 0.048(0.031:0.065) | 0.10(.073:0.133)    | 0.044(0.013:0.076)  | -0.059(-.100:-.017)           | 0.0069 |
| 4th                      | 0.087(0.063:0.110) | 0.06(.041:0.078)   | 0.083(0.061:0.104)  | 0.039(0.014:0.064)  | -0.044(-.075:-.012)           | 0.0076 |
| richest                  | 0.10(0.090:0.12)   | 0.064(0.049:0.079) | 0.045(0.0035:0.086) | 0.049(-.0068:0.105) | 0.0045(-.062:0.071)           | 0.8937 |

### Hospital utilisation for in-patient care

Overall, hospitalisation rates have increased in both AP and Maharashtra (Table 6) but more so in AP (5.6 per 1000 population vs 2.2), although the DID was not statistically significant. The sub group analysis presented a mixed picture. For both male and female headed households there was a greater increase in hospitalisation in AP, but this reached moderate statistical significance only for female headed households (DID=27.6, 95% CI =1.1:54.1, p-value = 0.0415). There is an increase in hospitalisations among scheduled tribes in Maharashtra and a reduction in AP (DID = -19.8, 95% CI = -37.3: -2.3, p-value = 0.0272) but the opposite picture was seen among 'other excluded' groups with an increase in AP and a reduction in MH (DID = 12.5, 95% CI= 1.2:23.9 p-value = 0.0309). In scheduled castes hospitalisations had increased in both states but more so in AP, while in the 'other' group there was a small increase in MH and a small reduction in AP. In the poorest quintile, the increase in hospitalisation was significantly greater in MH (DID= -14.4, 95%CI=-28:-0.31, p= 0.0451).

**Table 6: Changes in hospitalisation (per 1000 population) in Maharashtra and AP between 2004 and 2012**

| Subgroups                                   | Baseline Mean (95% CI) |                | Change 2004:2012 Mean (95% CI) |                | DID          |   |
|---------------------------------------------|------------------------|----------------|--------------------------------|----------------|--------------|---|
|                                             | Maharashtra            | Andhra Pradesh | Maharashtra                    | Andhra Pradesh | Mean (95%CI) | p |
| <b>Hospitalizations per 1000 population</b> |                        |                |                                |                |              |   |

|                          |                     |                  |                     |                   |                       |        |
|--------------------------|---------------------|------------------|---------------------|-------------------|-----------------------|--------|
| All                      | 41.3(37.3:45.2)     | 31.5(27.8:35.3)  | 2.2 (-4.7:9.1)      | 5.6(-1.1:12.3)    | 3.4(-5.9 :12.7)       | 0.4636 |
|                          |                     |                  |                     |                   | <b>DID (adjusted)</b> |        |
|                          |                     |                  |                     |                   | 0.7(-8.6:10.2)        | 0.8685 |
| <b>Head of Household</b> |                     |                  |                     |                   |                       |        |
| Male                     | 41.0(37.1:44.9)     | 31.7 (16.9:34.0) | 1.9( -5.1:8.8)      | 4.4( -2.4:11.1)   | 2.5( -6.9:11.9)       | 0.5966 |
| Female                   | 51.6 (30.6:72.5)    | 25.5(27.7:35.7)  | 13.9( -7.53:35.4)   | 41.5 ( 24.6:58.4) | 27.6( 1.1:54.1)       | 0.0415 |
| <b>Social Group</b>      |                     |                  |                     |                   |                       |        |
| Scheduled Tribes         | 23.7(14.2 :33.1615) | 35.5(21.9:49.1)  | 17.1(5.8:28.5)      | -2.7(-16.95:11.5) | -19.8(-37.3: -2.3)    | 0.0272 |
| Scheduled Castes         | 42.4(36.3:48.4)     | 29.5(22.6:36.5)  | 3.9(-7.9:15.7)      | 7.6( -2.6:17.7)   | 3.7( -11.4:18.7)      | 0.6268 |
| Other Excluded           | 44.2(38.2:50.2)     | 29.9( 25.5:34.3) | -1.9(-11.2 :7.3109) | 10.6(3.4:17.8)    | 12.5(1.2:23.9)        | 0.0309 |
| All other Groups         | 42.5(37.1:47.9)     | 34.9(29.0:40.9)  | 0.93(-7.3:9.1)      | -1.1(-9.4: 7.4)   | -2.0( -13.5 :9.4)     | 0.7235 |
| <b>Location</b>          |                     |                  |                     |                   |                       |        |
| Rural                    | 36.6(32.2:41)       | 28.9(26.4:31.5)  | 9.5(3.5:15.4)       | 8.8(2.2:15.3)     | -0.69( -9.3:7.9)      | 0.8725 |
| Urban                    | 48.2(43.7:53)       | 38.2(35.5:41.2)  | -7.9(-14.5: -1.3)   | -2.5( -12.1:7.1)  | 5.4(-5.8:16.6)        | 0.3358 |
| <b>Quintile</b>          |                     |                  |                     |                   |                       |        |
| poorest                  | 31.4(25.9:36.9)     | 27.5(22.8:32.1)  | 20.7(9:32.8)        | 6.4( -1.7:14.4)   | -14.4(-28:-0.31)      | 0.0451 |
| 2nd                      | 36.5(28.3:44.7)     | 27.1(21.9:32.4)  | 8(0.5:15.4)         | 8.9(-.56:18.4)    | 0.9( -10 : 12.5)      | 0.8746 |
| middle                   | 47.8(33.6:62.1)     | 35.3(29.0:41.6)  | -1.5(-17.9:14.8)    | 4.1(-.56:13.7)    | 5.6( -12.8:24.0)      | 0.5457 |
| 4th                      | 46.9(39.9:53.9)     | 41.7(32.7:50.8)  | -4.0( -12:3.4)      | -5.1( -15.7:5.4)  | -0.75( -13.3:11.9)    | 0.9056 |
| richest                  | 51.0(46:56.1)       | 36.5(25.8:47.2)  | -13.1(-18.9: -7.1)  | 1.5( -19.5:22.6)  | 15.0( -5.8: 3.6)      | 0.1665 |

### LIMITATIONS OF THE STUDY

Difference in differences estimations aimed at assessing the impacts of interventions, assume that both populations demonstrate similar characteristics prior to the start of the intervention, and that 'unobservables' follow a common trend; under such circumstances, any differences in changes observed over time between the 2 populations are attributable to the interventions<sup>39, 40</sup>. Despite AP and Maharashtra having broadly similar socio-economic profiles, as well as our DID analysis taking account of a number of covariates, there may have been other factors resulting in unobserved differential changes between the 2 populations and to which the results of the DID analysis may be at least partially attributable.

A second limitation could arise from the impact of other public health programmes implemented during the period 2004 to 2012. The most significant of these is the National Rural Health Mission launched in 2005, mainly to improve maternal and child health through the revitalization of rural primary care and child and maternal health services. A key assumption of our study is that the impacts of the NRHM in terms of healthcare expenditure for maternal and child health care would have been similar in both states, as this was a nationwide development. Despite the improvements in the public sector maternal and child health services sought by the NRHM, it is widely recognised that the public, including BPL families, continues to pay OOP for private health care. We have assumed that this behaviour is likely to be similar across the 2 states. Other health initiatives such as the Navsanjeevani Yojana and HMRI were unlikely to have had an impact on inpatient care or

1  
2  
3 expenditure. The 108 scheme had the potential, in AP, to influence hospitalisation rates, by helping  
4 more households to visit hospitals when seriously ill. But the effect is likely to be small as the  
5 majority of even serious illnesses do not result in a 108 call for transport. The implementation of the  
6 RSBY and the scheme to make private hospital beds available for the poor in MH may have diluted  
7 the DID, although both schemes are known to have been only partially implemented.  
8

9  
10 Lastly, the 2004 NSSO survey which served as our baseline, was carried out between January and  
11 June 2004. Our end-line 2012 survey was carried out over a period of 3 months from June to  
12 September. The morbidity and mortality patterns recorded in different time periods may vary, and  
13 could have influenced the data.

## 14 DISCUSSION

15  
16 We found that average expenditure, large expenditures and large borrowings on inpatient care had  
17 increased in both MH and AP, but the increase was consistently smaller in AP across these 3  
18 outcome measures, and may be suggestive of Aarogyasri having a somewhat larger effect than RSBY.  
19 Similar increases in institutional deliveries across the 2 states, and low levels of utilisation of RSBY  
20 and Jeevodayee schemes in MH may further strengthen this explanation.  
21

22  
23 The increase in average OOPE on inpatient care in AP and MH reflects a pattern observed  
24 nationwide<sup>16, 41</sup>. The Aarogyasri scheme may have contributed to the more favourable trajectory in  
25 AP both directly and indirectly, in that the scheme may have contributed to a reduction in the prices  
26 of interventions and an increase in competition among health care providers. The evaluation of the  
27 Yeshasvini scheme also found a significant reduction in the price of surgical interventions<sup>10</sup>. Our  
28 findings may suggest that the positive effects of Aarogyasri detected by other studies<sup>15, 16</sup> at an early  
29 stage of the roll out of the scheme have been sustained. Automatic enrolment into the scheme, near  
30 universality of coverage and no requirement for enrollee contributions may have contributed to the  
31 significant DIDs in male headed households, scheduled castes, rural households and the poorest and  
32 middle asset quintiles. But these benefits were not demonstrated in some of the most vulnerable  
33 groups - female headed households and scheduled tribes. This is consistent with the findings of  
34 other studies<sup>5, 16</sup> which reported that the slightly less vulnerable may benefit more from such  
35 schemes, with non-financial barriers undermining access to services for the most vulnerable socio-  
36 economic groups. The case summaries below illustrate the obstacles they face. A similar observation  
37 was reported by the evaluation of the Mexican Seguro Popular health scheme which showed that a  
38 third of the treatment-cluster households who were automatically affiliated were unaware of this  
39 fact<sup>42</sup>.  
40  
41

42  
43 The likely explanation of an Aarogyasri effect may be strengthened by the changes in terms of large  
44 borrowings which has also increased over time in both states but less so in AP across all groups of  
45 analysis except the richest asset quintile. A multi-country analysis of household catastrophic health  
46 expenditure highlighted that increasing the availability of health services is critical to improving  
47 health in poor countries, but it could also raise the proportion of households facing catastrophic  
48 expenditure unless financial risk protection policies are given a high priority<sup>43</sup>. Borrowing of  
49 comparatively small amounts is less impactful and may be a result of improved access to financial  
50 markets and also supports consumption smoothing. During recent decades, AP has in particular  
51 witnessed a significant rise in microfinance institutions and debt due to high levels of interest levied  
52 by the more recent entrants to this market<sup>44, 45</sup>. Nevertheless our results suggest that increases in  
53 large borrowings associated with inpatient health care were smaller in AP. Strongly significant DIDs  
54 in scheduled tribes, rural households and the poorest and second asset quintiles and moderately  
55 significant DIDs in female headed households, scheduled castes, and other excluded social groups  
56 may also point to Aarogyasri beginning to offer greater access to health care when families are faced  
57 with serious illness.  
58  
59  
60

1  
2  
3 In terms of large OOPE, a significant DID was found only for the total households, but the direction  
4 of all DIDs except for the second asset quintile was the same as for average expenditure on inpatient  
5 care and large borrowings, i.e., in favour of AP. It is perfectly possible that the non-significant  
6 differences for the majority of sub groups are due at least in part to the RSBY, the availability of  
7 private sector hospital beds for the poor and the Jeevandayee schemes reducing large OOPE in MH,  
8 and that without these schemes the expenditure would have been greater. In AP, 70 percent of  
9 survey households reported that they were covered by the Aarogyasri scheme, but only 25 percent  
10 of these 'covered' households were aware that the benefit package was limited. It is also possible  
11 therefore that in AP some families seek hospital care assuming that the Aarogyasri scheme provides  
12 comprehensive cover, but are faced with large expenditures when their treatments fall outside the  
13 limits.  
14

15  
16 The mixed picture in relation to the increasing rate of hospitalisations in both states may suggest  
17 that the Aarogyasri and in particular, the RSBY scheme which covers common hospital procedures  
18 are addressing a large hitherto unmet need for inpatient care. The 108 scheme in AP may be an  
19 additional albeit smaller contributor. It may also be explained by a supplier-induced demand. An  
20 assessment of health provider behaviour and governance is an important strand of the evaluation of  
21 health financing schemes<sup>46</sup>, but was outside the remit of our study. We would however strongly  
22 recommend an impact evaluation focusing on health care supply to complement our evidence.  
23 The greater increase in hospitalisation in AP, in female-headed households and 'other excluded  
24 groups', which are two of the most vulnerable population groups, is encouraging. But the reduction  
25 in hospitalisations among scheduled tribes and the poorest asset quintile in AP are of concern and  
26 suggest that if the poor are to secure the benefits appropriated by the near poor or more often by  
27 the rich<sup>47</sup>, the provision of more comprehensive health schemes is essential, which combines the  
28 tertiary and secondary care focus of Aarogyasri and the secondary care benefits of RSBY with  
29 attention paid to minimise barriers such as the widespread influence of illiteracy and lack of  
30 awareness, which limit access to even schemes such as Aarogyasri that are apparently highly  
31 inclusive and non-discriminatory, as well as distance to facilities. Our case summaries illustrate this.  
32 Furthermore, health financing reforms such as the Jamkesmas<sup>48</sup> in Indonesia and the Seguro Popular  
33 in Mexico<sup>42</sup>, both countries similar to India in terms of population and growing economies, include  
34 outpatient and inpatient care, and curative as well as preventive services, suggesting that a more  
35 comprehensive service is possible to implement and worthy of consideration.  
36  
37

38  
39 In summary, health innovations in AP had a greater beneficial effect on hospital inpatient care-  
40 related expenditures than innovations in MH. The Aarogyasri scheme is likely to have contributed to  
41 these impacts in AP, at least in part. But in both states, OOPE increased over time, in keeping with  
42 the picture reported nationwide<sup>49</sup>. Likely explanations are that the poor spend the largest proportion  
43 of OOPE on drugs<sup>50</sup>, an expenditure not adequately addressed by the health financing schemes  
44 including the RAS which provide only 'follow up' medicines for limited periods, after discharge from  
45 hospital. Yet, chronic disease such as diabetes may result in a one-off cardio-vascular intervention  
46 funded by the RAS, but also life-long medication required to be paid for out-of-pocket. Other  
47 possible explanations are medical inflation and rising costs of initial consultation and diagnostic  
48 investigation of symptoms, often in the rapidly growing private sector out-patient services, prior to  
49 hospitalisation under the cover of the RAS or the other health financing schemes. Hospitalisations  
50 also increased, and while it is generally assumed that in developing countries this is likely to address  
51 genuine need, its impact on health status is not known.  
52

### 53 **IMPLICATIONS FOR POLICY AND PRACTICE**

54  
55  
56 Despite these uncertainties, Aarogyasri is perceived, with some justification across India as a  
57 successful scheme, and is being rapidly replicated across the states. Since July 2012, MH too has  
58 joined the list of states offering an Aarogyasri-like scheme, the Rajiv Gandhi Jeevandayee Arogya  
59



1  
2  
3 Yojana<sup>51</sup>. This study has highlighted that such schemes may result in some positive outcomes.  
4 Although the study was not designed to elicit the specific features of the scheme to which any  
5 comparatively greater benefits may be attributable, and which deserve to be replicated in other  
6 states, evidence from systematic reviews<sup>3</sup> points to the need for schemes to be more  
7 'comprehensively' designed to maximise their positive impact. Aarogyasri's design in terms of its  
8 aims to address both financial and non-financial barriers - being fully state funded, the systematic  
9 administrative implementation of Aarogyasri across the state so that it is now almost universal,  
10 automatic enrolment, allowing access to the scheme via a ration card which most poor families own,  
11 the wide spectrum of treatments offered, the large number of health care providers empanelled - is  
12 perhaps responsible as a 'comprehensive' package, for the greater impact.  
13

14  
15 But the study also suggests that improved access to health care and the reduction of the overall  
16 burden of OOPE especially in the most vulnerable sections of the population<sup>52</sup> are likely to require  
17 additional interventions that address gaps in the availability of care and provide patients appropriate  
18 pathways that support their journey from a strong and comprehensive primary care service where  
19 they may be informed of their entitlements and investigated for their initial symptoms to  
20 appropriate hospitals for the treatment of serious illness. Besides, inpatient care is only consumed  
21 by a small proportion of households in a year<sup>53</sup>, and this is especially true of tertiary care, while  
22 many more will seek outpatient services and referral to inpatient care, should this be required.  
23 Others have strongly recommended the strengthening of the primary care base as an essential  
24 means to universal health coverage and this study confirms their view<sup>41</sup>. Key implications for AP are  
25 to explore how best the most advantageous features of Aarogyasri can be extended to include both  
26 secondary and primary care, while those for MH may be to build on and unify its menu of currently  
27 available schemes to create an evidence-based comprehensive health delivery system. These  
28 conclusions may be applicable to other states with similar health financing schemes.  
29  
30

31 The design of health financing systems as well as their evaluations is complex and challenging, as the  
32 mountain of available evidence suggests<sup>41, 42, 52, 54</sup>. Even the ground-breaking Seguro Popular health  
33 insurance programme of Mexico which used a cluster-randomised trial design with strong  
34 government support demonstrated some but not all anticipated outcomes, contrary to  
35 expectations<sup>42</sup>, and a key recommendation was that continued assessment of the programme was  
36 needed. Furthermore, differences in data and methodology may result in even very well designed  
37 evaluations of the same programme producing contrasting findings<sup>52</sup>. Our evaluation is the first to  
38 use a survey methodology - the best possible in the hierarchy of evaluation methodologies, when a  
39 randomised control trial is not achievable - to evaluate the health financing reforms in 2 large states  
40 of India. Despite that, the study has limitations which we have acknowledged. For example, this  
41 study has examined health related expenditure and behaviours at only two points in time. To  
42 establish trends, it is suggested that more than two time points are needed. However, it needs to be  
43 recognised that schemes such as the Aarogyasri themselves may not have longevity in their original  
44 form and may change or be replaced in response to changing needs and policy imperatives. King et  
45 al acknowledged that their assessment of the Mexican Seguro Popular programme (at 10 months)<sup>42</sup>  
46 was undertaken at an early stage, but it was nevertheless recognised as having provided important  
47 evidence of impacts, albeit early ones. Therefore a realistic aim of an evaluation in this rapidly  
48 changing health delivery landscape in India would be to study change over time, even if that is  
49 limited initially to two time points, but to continue to evaluate the system repeatedly, and use the  
50 evidence to reshape health delivery to be responsive to future socio-economic and epidemiological  
51 trends. In addition, the evaluation was not designed to assess provider behaviours. Many other  
52 pertinent questions such as the impact of the schemes on the overall economy of health care cannot  
53 be answered by a single evaluation. But these are recognised problems which can only be addressed  
54 through continuous assessments, as other evaluations have shown. Our study has nevertheless  
55 produced sufficient insights to enable policy leaders to improve programme effectiveness and,  
56  
57  
58  
59  
60

1  
2  
3 importantly, to undertake further assessment. Our household survey data provide a valuable  
4 baseline for future monitoring and analyses of trends in both states.  
5

6 This study needs to be followed up with further and repeated evaluations as AP's and MH's schemes  
7 evolve; to assess the impacts of re-design and to help health policy leaders achieve their aspiration  
8 of universal access to good quality health care.  
9

### 14 **Three faces of the Aarogyasri Scheme**

#### 15 **The beneficiary:**

16 Lakshamma, a 65 year old widow, is from a tribal background. She is an unskilled labourer,  
17 supporting a family of 5, with a monthly income of INR 4000 (USD 74). She was referred to a  
18 municipal hospital with chest pain and underwent heart surgery. The hospital which is a part of the  
19 Aarogyasri network provided free care and her total out of pocket expenses amounted to INR 850  
20 (16 USD) for initial transport. In addition to the surgery, she received free food, money for transport  
21 home and follow up medicines. She is very satisfied with the service she received.  
22  
23  
24

#### 25 **The excluded:**

26 Ramulamma, a mother has a BPL card, but her daughter Lakshmi does not, as she was abandoned by  
27 her husband who is a government employee and entitled to free health care. The mother was  
28 unable to secure free care using her BPL card for her seriously ill daughter who paid out-of-pocket at  
29 a private facility where she was offered a hysterectomy for the relief of her gynaecological  
30 symptoms. Lakshmi's health care costs were met by the family selling a number of household assets  
31 and Lakshmi's daughter discontinuing her education to take up paid work. Lakshmi is severely  
32 depressed and does not speak to anyone.  
33  
34

#### 35 **The uninformed:**

36 Krishamma 43 years old, had severe stomach pains one night. Although the family had a BPL card,  
37 Ramulu her husband and Srinivas her son rushed her to a private hospital nearby, which was not  
38 part of the Aarogyasri network. They were unaware of how to access the Aarogyasri scheme  
39 hospitals which were further away from home, and the local primary health services being  
40 inadequate, Krishamma had not had her initial symptoms investigated. The treatment was funded  
41 through a loan from a private moneylender. On discharge, she has not attended follow up, as the  
42 family cannot afford transport or medicines.  
43  
44  
45  
46  
47  
48  
49  
50  
51  
52  
53  
54  
55  
56  
57  
58  
59  
60



## References

- <sup>1</sup> Resolution WHA58.33. Sustainable health financing, universal coverage and social health insurance. In: *Fifty-eighth World Health Assembly, Geneva, 16–25 May 2005*. Geneva, World Health Organization, 2005 ([http://apps.who.int/gb/ebwha/pdf\\_files/WHA58/WHA58\\_33-en.pdf](http://apps.who.int/gb/ebwha/pdf_files/WHA58/WHA58_33-en.pdf), accessed 26<sup>th</sup> March 2013).
- <sup>2</sup> World Health Organization. Health Systems Financing. Path to Universal Coverage. Geneva: World Health Organization. 2010. Available from: World Health Organization Library Information Services.
- <sup>3</sup> Acharya A, Vellakkal S, Taylor F, Masset E, Satija A, Burke M, Ebrahim S. Impact of national health insurance for the poor and the informal sector in low and middle income countries : a systematic review. London: EPPICentre, Social Science Research Unit, Institute of Education, University of London. 2012. Available from: <http://www.dfid.gov.uk/r4d/PDF/Outputs/SystematicReviews/Health-insurance-2012Acharya-report.pdf>
- <sup>4</sup> Giedion, U., B. Y. Diaz . A Review of the evidence. In: *The Impact of Health Insurance in Low-and Middle-Income Countries*. M. L. Escobar, C. Griffin and R. P. Shaw (ed). Washington DC, Brookings Inst Press 2011.
- <sup>5</sup> Giedion, U, Alfonso, E , Diaz. *The impact of universal coverage schemes in the developing world : a review of the existing evidence*. Universal Health Coverage (UNICO) studies series ; no. 25. Washington D.C. : The World Bank. 2013
- <sup>6</sup> National Commission on Macroeconomics and Health. Report of the National Commission on Macroeconomics and Health. New Delhi: Ministry of Health and Family Welfare of India. 2005. Available from: Ministry of Health and Family Welfare
- <sup>7</sup> Eleventh Five Year Plan (2007–2012). Vol 2: Social Sector. Government of India Planning Commission. October, 2008. [http://planningcommission.nic.in/plans/planrel/fiveyr/11th/11\\_v2/11th\\_vol2.pdf](http://planningcommission.nic.in/plans/planrel/fiveyr/11th/11_v2/11th_vol2.pdf), (accessed Mar 26 2013).
- <sup>8</sup> Faster, Sustainable and More Inclusive Growth. An Approach to the Twelfth Five Year Plan (2012-17). Government of India Planning Commission. October, 2011. [http://planningcommission.nic.in/plans/planrel/12appdrft/approach\\_12plan.pdf](http://planningcommission.nic.in/plans/planrel/12appdrft/approach_12plan.pdf), accessed 26th March 2013
- <sup>9</sup> La Forgia G, Nagpal S. Government-Sponsored Health Insurance in India. *Are You Covered?* World Bank Washington DC 2012. doi:10.1596/978-0-8213-9618-6.
- <sup>10</sup> Agarwal A. "Impact evaluation of India's 'Yeshasvini' community based health insurance programme. *Health Economics* 2010; 19: 5-35
- <sup>11</sup> The Rajiv Aarogyasri scheme website at <https://www.aarogyasri.org/ASRI/index.jsp>, accessed 26<sup>th</sup> March 2013.
- <sup>12</sup> RSBY scheme status. <http://www.rsby.gov.in/statewise.aspx?state=35> (accessed Apr 30 2013)
- <sup>13</sup> Mahal A. Learning and getting better: Rigorous evaluation of health policy in India. *National Medical Journal of India*. 2011. 325-27.
- <sup>14</sup> Aarogyasri Health Care Trust Annual Report 2011-2012. [https://www.aarogyasri.org/ASRI/EXT\\_IMAGES/documents/Annual\\_Report\\_201011.pdf](https://www.aarogyasri.org/ASRI/EXT_IMAGES/documents/Annual_Report_201011.pdf) (accessed Mar 26 2013)
- <sup>15</sup> Rao M, Ramachandra S, Bandyopadhyay S, et al. Addressing healthcare needs of people living below the poverty line: a rapid assessment of the Andhra Pradesh Health Insurance Scheme. *National Medical Journal of India*. 2011. 24(6):335-41.
- <sup>16</sup> Fan V, Karan A, Mahal A. "State Health Insurance and Out-of-Pocket Health Expenditures in Andhra Pradesh, India." CGD Working Paper 298. Washington, D.C.: Center for Global Development. 2012 <http://www.cgdev.org/content/publications/detail/1426275> (accessed Mar 15 2013)
- <sup>17</sup> Palacios R, Das J, Sun C eds. *India's health insurance scheme for the poor: Evidence from the early experience of Rashtriya Swasthya Bima Yojana*. New Delhi: Center for Policy Research; 2011
- <sup>18</sup> Rashtriya Swasthya Bima Yojana overview and scheme details. <http://www.rsby.gov.in> (accessed Apr 30 2013)
- <sup>19</sup> Rathi P. <http://www.priorities2012.com/documents/3d-4-patreek.pdf>
- <sup>20</sup> NRHM Mission Document. [http://www.nird.org.in/brgf/doc/Rural%20HealthMission\\_Document.pdf](http://www.nird.org.in/brgf/doc/Rural%20HealthMission_Document.pdf) (accessed Apr 30 2013)
- <sup>21</sup> State HMIS data analysis, April'10-March'11 Andhra Pradesh, prepared by NHSRC. [http://cfw.ap.nic.in/nrhm/pdf/AP\\_Analysis\\_Apr2010-Mar2011.pdf](http://cfw.ap.nic.in/nrhm/pdf/AP_Analysis_Apr2010-Mar2011.pdf) (accessed May 2 2013)

- 1  
2  
3  
4 <sup>22</sup> NRHM achievements in Maharashtra. <http://www.nrhm.maharashtra.gov.in/achievements.htm> (accessed  
5 May 2 2013)
- 6 <sup>23</sup> Health information helpline. <http://www.hmri.in/oursolutions-healthinformation.html> (accessed Apr 30  
7 2013)
- 8 <sup>24</sup> About the project/scheme. [http://www.maha-](http://www.maha-a)  
9 [a](http://www.maha-a)  
10 [a](http://www.maha-a)  
11 [a](http://www.maha-a)  
12 [a](http://www.maha-a)  
13 [a](http://www.maha-a)  
14 [a](http://www.maha-a)  
15 [a](http://www.maha-a)  
16 [a](http://www.maha-a)  
17 [a](http://www.maha-a)  
18 [a](http://www.maha-a)  
19 [a](http://www.maha-a)  
20 [a](http://www.maha-a)  
21 [a](http://www.maha-a)  
22 [a](http://www.maha-a)  
23 [a](http://www.maha-a)  
24 [a](http://www.maha-a)  
25 [a](http://www.maha-a)  
26 [a](http://www.maha-a)  
27 [a](http://www.maha-a)  
28 [a](http://www.maha-a)  
29 [a](http://www.maha-a)  
30 [a](http://www.maha-a)  
31 [a](http://www.maha-a)  
32 [a](http://www.maha-a)  
33 [a](http://www.maha-a)  
34 [a](http://www.maha-a)  
35 [a](http://www.maha-a)  
36 [a](http://www.maha-a)  
37 [a](http://www.maha-a)  
38 [a](http://www.maha-a)  
39 [a](http://www.maha-a)  
40 [a](http://www.maha-a)  
41 [a](http://www.maha-a)  
42 [a](http://www.maha-a)  
43 [a](http://www.maha-a)  
44 [a](http://www.maha-a)  
45 [a](http://www.maha-a)  
46 [a](http://www.maha-a)  
47 [a](http://www.maha-a)  
48 [a](http://www.maha-a)  
49 [a](http://www.maha-a)  
50 [a](http://www.maha-a)  
51 [a](http://www.maha-a)  
52 [a](http://www.maha-a)  
53 [a](http://www.maha-a)  
54 [a](http://www.maha-a)  
55 [a](http://www.maha-a)  
56 [a](http://www.maha-a)  
57 [a](http://www.maha-a)  
58 [a](http://www.maha-a)  
59 [a](http://www.maha-a)  
60 [a](http://www.maha-a)
- <sup>25</sup> Jeevandayee scheme performance: Information received from Rajiv Gandhi Jeevandayee Arogya Yojana Society Govt of Maharashtra on May 17 2013
- <sup>26</sup> Projects and schemes. <http://maha-arogya.gov.in/projectandschemes/itdpnavsanjivani%5Cdefault.htm> (accessed Apr 30 2013)
- <sup>27</sup> Mallepeddi R , Pernefeldt H, Bergkvist S . Andhra Pradesh health sector reform, A narrative case study, Technical paper No.7 for The Rockefeller Foundation–Sponsored Initiative on the Role of the Private Sector in Health Systems in Developing Countries. 2009 ; pp 42-48
- <sup>28</sup> EMRI. <http://www.emri.in/states.html> (accessed Apr 30 2013)
- <sup>29</sup> Developing and evaluating complex interventions: new guidance. Medical Research Council. London 2008.
- <sup>30</sup> Cesar G V, Jean-Pierre H, Jennifer B. Evidence-Based Public Health: Moving Beyond Randomized Trials. Am J Public Health. 2004 March; 94(3): 400–405.
- <sup>31</sup> Presentation on Annual Plan 2012-13 and Five Year Plan 2012-17. [http://planningcommission.nic.in/plans/stateplan/Presentations12\\_13/maharashtra1213.pdf](http://planningcommission.nic.in/plans/stateplan/Presentations12_13/maharashtra1213.pdf) (accessed on Mar 25 2013)
- <sup>32</sup> National Sample Survey Organization. Morbidity, Healthcare and condition of the Aged. New Delhi: Ministry of Statistics and Programme Implementation. 2004.
- <sup>33</sup> National Sample Survey Organization. Household Consumer Expenditure 66<sup>th</sup> round . New Delhi: Ministry of Statistics and Programme Implementation; 2009-10
- <sup>34</sup> National Sample Survey Organization. Household Consumer Expenditure in India. New Delhi: Ministry of Statistics and Programme Implementation; 2005.
- <sup>35</sup> Booyesen F, Van der Berg S & Burger R. Using an Asset Index to Assess Trends in Poverty in Seven Sub-Saharan African Countries. World Development. 2008; 36(6): 1113–1130
- <sup>36</sup> Vyas S. & Kumarnayake L. Constructing socio-economic status indices: How to use principal components analysis. Health Policy and planning. 2006; 459-468
- <sup>37</sup> O'Donnell O, Van Doorslaer E, Wagstaff A & Lindelow M, 2008. Analyzing Health Equity Using Household Survey Data: A Guide to Techniques and Their Implementation. Washington DC: World Bank Institute. Chapter 6, Measurement of Living Standards. <http://siteresources.worldbank.org/INTPAH/Resources/Publications/459843-1195594469249/HealthEquityFINAL.pdf> (accessed May 9 2013)
- <sup>38</sup> Ministry of Finance. Economic Survey 2011-12. New Delhi: Government of India. 2012. Available from: <http://indiabudget.nic.in/>
- <sup>39</sup> Poverty Reduction and Social Development Department. A User's Guide to Poverty and Social Impact Analysis. Washington: World Bank;2003
- <sup>40</sup> Gertler P, Martinez S, Premand P, Rawlings L, Vermeersch C. Impact Evaluation in Practice. Washington: World Bank; 2011.
- <sup>41</sup> Selvaraj S, Karan A. Why Publicly-Financed Health Insurance Schemes Are Ineffective in Providing Financial Risk Protection. Economic and Political Weekly 2012 March 17; XLVII(11):60-68
- <sup>42</sup> King G, Gakidou E, Imai K, Lakin J, Moore RT, Nall C. Public policy for the poor? A randomised assessment of the Mexican universal health programme. Lancet. 2009 Apr 8; DOI:10.1016/S0140-6736(09)60239-7.
- <sup>43</sup> Xu K, Evans DB, Kawabata K, Zeramdini R, Klavus J, Murray CJ. Household catastrophic health expenditure: a multicountry analysis. Lancet. 2003 Jul 12;362(9378):111-7.
- <sup>44</sup> Naga Sridhar G. Microfinance institutions: Moving beyond AP crisis. The Business Line [Newspaper Online]. 2012 Dec 29. Available from: <http://www.thehindubusinessline.com/companies/microfinance-institutions-moving-beyond-ap-crisis/article4253239.ece>
- <sup>45</sup> Naga Sridhar G. Life after microfinance in AP. The Business Line [Newspaper Online]. 2013 Jan 4. Available from: <http://www.thehindubusinessline.com/opinion/life-after-microfinance-in-ap/article4273183.ece>
- <sup>46</sup> Prasad N P, Raghavendra P. Healthcare models in the era of medical neoliberalism. A study of Aarogyasri in Andhra Pradesh. Economic and Political Weekly 2012 Oct 27;XLVII(43):118-126

1  
2  
3  
4 <sup>47</sup> Health Systems 20-20. An Evaluation of the Effects of the National Health Insurance Scheme in Ghana.  
5 Bethesda: Health Systems 20-20. 2009.

6 <sup>48</sup> <http://www.jointlearningnetwork.org/programs/compare/benefits/142%2C16>

7 <sup>49</sup> Ghosh S. Catastrophic Payments and Impoverishment due to Out-of-Pocket Health Spending.  
8 Economic and Political Weekly, 2011 Nov 19; XLVI(47): 63-70.  
9

10 <sup>50</sup> Garg CC, Karan AK. Reducing out-of-pocket expenditures to reduce poverty: a disaggregated analysis  
11 at rural-urban and state level in India. Health Policy Plan. 2009; 24 (2):116-128.

12 <sup>51</sup> Rajiv Jeevandayi scheme details.

13 [http://www.jeevandayee.gov.in/RGJAY/FrontServlet?requestType=CommonRH&actionVal=RightFrame&page=](http://www.jeevandayee.gov.in/RGJAY/FrontServlet?requestType=CommonRH&actionVal=RightFrame&page=undefined%3E%3E%3Cb%3ERGJAY%3C/b%3E&pageName=RGJAY&mainMenu=About&subMenu=RGJAY)  
14 [undefined%3E%3E%3Cb%3ERGJAY%3C/b%3E&pageName=RGJAY&mainMenu=About&subMenu=RGJAY](http://www.jeevandayee.gov.in/RGJAY/FrontServlet?requestType=CommonRH&actionVal=RightFrame&page=undefined%3E%3E%3Cb%3ERGJAY%3C/b%3E&pageName=RGJAY&mainMenu=About&subMenu=RGJAY)  
15 (accessed on Apr 30 2013)

16 <sup>52</sup> Tangcharoensathien V, Swasdiworn W, Jongudomsuk P et al . Universal Coverage Scheme in Thailand: Equity  
17 Outcomes and Future Agendas to Meet Challenges. Geneva: World Health Organization. 2010.

18 <sup>53</sup> Dilip TR. On Publicly-Financed Health Insurance Schemes. Is the analysis premature? Economic and Political  
19 Weekly. 2012 May 5; XLVII(1)8:79-80.

20 <sup>54</sup> Vallakal S, Ebrahim S. Publicly-Financed Health Insurance Schemes. Concerns about Impact Assessment.  
21 Economic and Political Weekly. 2013 Jan 5; XLVIII(1);24-27.  
22  
23  
24  
25  
26  
27  
28  
29  
30  
31  
32  
33  
34  
35  
36  
37  
38  
39  
40  
41  
42  
43  
44  
45  
46  
47  
48  
49  
50  
51  
52  
53  
54  
55  
56  
57  
58  
59  
60

**TITLE PAGE****TITLE:**

**TrendsChanges** in addressing inequalities in access to hospital care in Andhra Pradesh and Maharashtra states of India. *A cross sectional difference-in-differences study*

**STUDY DESIGN:** A cross-sectional difference in differences study with parallel control.

**AUTHOR NAMES, ADDRESSES AND POSITIONS:**

1. Mala Rao. Professor of International Health, Institute for Health and Human Development, University of East London, UK & Honorary Adviser, Administrative Staff College of India, Hyderabad
2. Anuradha Katyal, Consultant, ACCESS Health International, Hyderabad, India
3. Prabal V Singh, Director Research, ACCESS Health International, Hyderabad, India
4. Amit Samarth, Head, Strategy and Planning, SughaVazhvu Healthcare, Thanjavur, India
5. Sofi Bergkvist, Managing Director, ACCESS Health International, Hyderabad, India
6. Manjusha Kancharla, Research Associate, Indian School of Business, Hyderabad India
7. Adam Wagstaff, Research Manager, Human Development & Public Services team, Development Research Group (DECRG), The World Bank, Washington DC, USA
8. Gopalakrishnan Netuveli. Professor of Public Health, Institute for Health and Human Development, University of East London & ESRC International Centre for Life Course Studies in Society and Health, University College London, UK
9. Adrian Renton. Director, Institute for Health and Human Development, University of East London, UK

**All authors had full access to all the data (including statistical reports and tables) and can take responsibility for the integrity of the data and the accuracy of the data analysis**

**Corresponding author and guarantor of the data and information:** Mala Rao (best email address: m.rao@uel.ac.uk).

**M Rao affirms that the manuscript is an honest, accurate and transparent account of the study being reported and no important aspects of the study have been omitted.**

**FUNDED BY :** Wellcome Trust, IDRC, Rockefeller Foundation, DFID, World Bank.

**ROLE OF THE FUNDING SOURCES:** The external funding sources had no role in study design, data collection, analysis, interpretation or reporting, or in submission decision.

**ROLE OF THE STUDY SPONSOR:** The study was carried out in response to the formal invitation of the Government of Andhra Pradesh which supported our applications for funding (by providing formal

1  
2  
3 letters of support). The Government did not provide any funding, and had no role in study design,  
4 data collection, analysis, interpretation or reporting, or in submission decision.  
5

6 **STATEMENT OF INDEPENDENCE OF RESEARCHERS:** The authors can confirm that they worked  
7 independently from the Funders and Government of Andhra Pradesh who had no role in any aspect  
8 of the research  
9

#### 10 **CONFLICT OF INTEREST**

11  
12 All authors have completed the ICMJE forms for disclosure of potential conflicts of interest (available  
13 on request from the corresponding author) and declare that 1) MR, AK, PS, AS, and SB have support  
14 from the Rockefeller Foundation, Wellcome Trust, International Development Research Centre,  
15 Canada and Department for International Development, UK, 2) the authors have no relationships  
16 with the funders that might have an interest in the submitted work in the previous 3 years, 3) the  
17 authors' spouses, partners, or children have no financial relationships that may be relevant to the  
18 submitted work, and 4) the authors have no non-financial interests that may be relevant to the  
19 submitted work.  
20  
21

22  
23 **ETHICAL APPROVAL:** given by the research ethics committee of the Administrative Staff College of  
24 India, Hyderabad, which hosted the study. Household survey questionnaires include signed consent  
25 by the head of the household or another adult representative of the household.  
26  
27

28  
29  
30 **DATA SHARING STATEMENT:** The 2004 National Sample Survey Organisation of India household  
31 survey questionnaire and data are available to the public. The 2012 household survey questionnaire,  
32 and the full anonymised household survey dataset will be available with open access as soon as the  
33 data analyses and submissions for publication are completed.  
34

35  
36 **COPYRIGHT STATEMENT:** Mala Rao, the Corresponding Author has the right to grant on behalf of all  
37 authors and does grant on behalf of all authors, an exclusive licence on a worldwide basis to the BMJ  
38 Publishing Group Ltd to permit this article (if accepted) to be published in BMJ editions and any  
39 other BMJ PGL products and sublicences such use and exploit all subsidiary rights, as set out in your  
40 licence.  
41

42 **STROBE CHECKLIST FOR CROSS SECTIONAL STUDIES:** We can confirm that all 22 items in the  
43 STROBE checklist are included in the paper.  
44

#### 45 **CONTRIBUTORS' STATEMENT**

46  
47 MR conceived and designed the study, applied for funding, and was responsible for the supervision  
48 and management of all aspects of the study as well as the dissemination of its results. She is also the  
49 guarantor of the study. SB shared responsibility for the conception of the study, applications for  
50 funding, study design and data collation and analysis, contributed to the questionnaire design and  
51 commented on drafts of the report. PS contributed to the conception of the study and study design,  
52 led the questionnaire design and survey implementation, including training of survey staff,  
53 monitoring survey progress and data collation and verification, commented on drafts of the report  
54 and helped prepare the references. AK undertook the data collation, verification and analysis,  
55 assisted with the survey and questionnaire design and survey implementation and prepared the  
56  
57  
58  
59  
60

1  
2  
3 tables for the report. AS led the literature review, assisted with the study and questionnaire design,  
4 survey implementation and preparation and analysis of baseline data, and commented on drafts of  
5 the report. MK helped with the data analysis. AW devised the methodology for the estimation of the  
6 programme impacts, advised during the data-collection and data-preparation stages, wrote and  
7 implemented the computer code for the model estimation, helped to oversee the production of the  
8 results, and contributed text to the report. GN provided technical advice on accounting for the  
9 complex survey structure in the analysis, developed a STATA equation, helped to compute an asset  
10 index, advised on the output tables, verified the analysis and commented on drafts of the report. AR  
11 helped develop a conceptual framework for the evaluation, advised on funding proposals, the study  
12 design, analytical methodology and presentation of results and contributed text to the report. MR  
13 wrote the first draft of the paper and its redrafts in accordance with the comments of all other  
14 authors and reviewers.  
15  
16  
17  
18  
19  
20  
21  
22  
23  
24  
25  
26  
27  
28  
29  
30  
31  
32  
33  
34  
35  
36  
37  
38  
39  
40  
41  
42  
43  
44  
45  
46  
47  
48  
49  
50  
51  
52  
53  
54  
55  
56  
57  
58  
59  
60

**ABSTRACT. WORD COUNT: 300****OBJECTIVES**

To compare the effects of the Rajiv Aarogyasri Health Insurance Scheme of Andhra Pradesh (AP) with health financing innovations including the RSBY in Maharashtra (MH) over time on access to and out of pocket expenditure (OOPE) on hospital inpatient care.

**STUDY DESIGN**

A cross-sectional difference in differences (DID) study with parallel control.

**SETTING**

National Sample Survey Organisation of India (NSSO) urban and rural 'first stratum units', 863 in AP and 1008 in MH.

**METHODS**

We used two cross-sectional surveys: as a baseline, the data from the NSSO 2004 survey collected before the Aarogyasri and RSBY schemes were launched and as post-intervention, a survey using the same methodology conducted in 2012.

**PARTICIPANTS**

8623 households in AP and 10073 in MH

**MAIN OUTCOME MEASURES**

Average OOPE, large OOPE and large borrowing per household per year for inpatient care, hospitalisation rate per 1000 population per year.

**RESULTS**

Average expenditure, large expenditures and large borrowings on inpatient care had increased in both MH and AP, but the increase was smaller in AP across these 3 measures. DIDs for average expenditure and large borrowings were significant and in favour of AP for the rural and the poorest households. Hospitalisation rates also increased in both states but more so in AP, although the DID was not significant and the sub group analysis presented a mixed picture.

**CONCLUSIONS**

Health innovations in AP had a greater beneficial effect on inpatient care-related expenditures than innovations in MH. The Aarogyasri scheme is likely to have contributed to these impacts in AP at least in part. However, out of pocket expenditure increased in both states over time. Schemes such as the Aarogyasri and RSBY may result in some positive outcomes but, additional interventions may be required, to improve access to care for the most vulnerable sections of the population.



**ARTICLE SUMMARY****STRENGTHS AND LIMITATIONS OF THE STUDY**

- This study uses ~~a quasi-experimental design~~ cross-sectional surveys to compare changes between the Indian states of Andhra Pradesh and Maharashtra, in hospital inpatient care related expenditures and behaviours before and after the rollout of the Aarogyasri and RSBY schemes
- The study based on a survey of 18696 households has shown that health innovations in Andhra Pradesh had a greater beneficial effect on hospital inpatient care-related expenditures and access than innovations in Maharashtra. The Aarogyasri scheme is likely to have contributed to these impacts in Andhra Pradesh.
- The study also highlights the implications of the findings for policy and practice and additional interventions necessary to address gaps in the availability of and access to care.
- The study is only able to compare the effects of health innovations over time across the 2 states but does not allow the drawing of inferences on the impacts of individual initiatives.
- The study uses the difference in differences methodology and its findings may have been affected by unobservable differential changes between the 2 states.



**ACKNOWLEDGEMENTS:**

The study was funded by the International Development Research Centre, Canada, the Wellcome Trust, the UK Department for International Development, and Rockefeller Foundation. The World Bank supported Adam Wagstaff's contribution to the study. We gratefully acknowledge the financial support of these organisations, as well as the enthusiastic encouragement we have received from them throughout the study. Our thanks also go to Bhimasankaram Pochiraju, Sundaresh Peri, C Ravi, and Rahul Ahluwalia for their advice and guidance at various stages of the study design and data analysis, and to colleagues at the University of East London and Administrative Staff College of India Hyderabad for their administrative support. The authors also thank P Suryanarayana, CM Reddy, D Chakrapani and K Pandu Ranga Reddy and AY Jadhav and his colleagues for their contribution to the training of the survey teams, verification of the survey and data collection and acknowledge the IMRB International Social Research Institute team's support in carrying out the survey.

We are grateful to Somil Nagpal and Joseph Kutzin for commenting on the report and helping us to improve it, to Sujatha Rao for her encouragement and valuable suggestions and ideas throughout the course of the study and to Jay Bagaria for her help during the early stage of the development of the proposal. Finally we thank PV Ramesh without whose constant support, guidance and encouragement, this study would not have been possible.

## INTRODUCTION

In 2005, member states of the World Health Organization (WHO) committed to develop their health financing systems to deliver universal coverage (UC); that is that all people have access to health services and do not suffer financial hardship paying for them<sup>1</sup>. WHO's 2010 World Health Report<sup>2</sup> recommended *inter alia* that countries reduce reliance on direct payments, and improve equity of access, including through the introduction of prepayment schemes. However, one recent systematic review of the impact of national health insurance schemes in low and middle income countries<sup>3</sup> found only weak evidence of increased use of healthcare and reduced out-of-pocket expenses, with the poorer benefitting less, whilst others<sup>4,5</sup> concluded that health insurance improved health care access and use, as well as financial protection in most cases but had no conclusive impact on health status. Both highlighted the need for more rigorous assessments of such schemes.

India has one of the highest levels of out-of-pocket health expenditure (more than 80% of private health expenditure)<sup>6</sup>. The aim of our study was to explore how recently introduced health financing initiatives have affected access to and out-of-pocket expenditure (OOPE) on inpatient hospital care in the Indian states of Andhra Pradesh (AP) and Maharashtra (MH).

## BACKGROUND

In its *Eleventh Five Year Plan (2007-12)*<sup>7</sup>, Government of India sought to increase Public Expenditure on Health and to strengthen investment in rural health infrastructure through the National Rural Health Mission. Its *Twelfth Five Year Plan (2012-17)*<sup>8</sup>, reflected the recommendation of the Planning Commission's High Level Expert Group for general taxation to be the principal source of health care financing. It proposed the development of government-funded health insurance schemes, building on the evidence from experimental schemes being introduced across many States. In India, health is primarily a state rather than national responsibility<sup>6</sup>. Whilst it is recognised that political will and good governance are essential, both the political mobilization of funds for health schemes and the effectiveness and efficiency of funded schemes will be enhanced by robust evidence which documents as to whether schemes achieve objectives, what works well and the main challenges they face.

In India, evaluation is not routine, even of large costly public health care programmes. Nevertheless, some assessments have been carried out, for example of the Yeshasvini Co-operative Farmers Health Care Scheme of Karnataka, the longest running state-supported health insurance scheme for the informal sector in India<sup>9</sup>, with promising results in terms of increased utilization of and reduced borrowing for health care services<sup>10</sup>. However, these early models covered small populations and offered limited benefits, so that the policy implications of conclusions drawn from even the best evaluations were unclear.

This scenario has changed during the past 5 years, with the launch of 2 schemes, the Rajiv Aarogyasri<sup>11</sup> Community Health Insurance Scheme (Aarogyasri) of Andhra Pradesh (AP) and Rashtriya Swasthya Bima Yojana (RSBY) currently offered in 30 states and union territories of India<sup>12</sup> including AP's neighbouring state of Maharashtra (MH). Their scale in terms of population coverage and range of treatments offered, significantly enhances their potential to inform India's road map towards universal health coverage. Both schemes belong to the new generation of publicly funded government-sponsored health insurance schemes, principally aimed at providing financial protection to the poor against catastrophic health shocks, which, for these schemes, the Government has defined as inpatient hospital care<sup>9</sup>. Both schemes have been subject to some assessment in their early phases, but a recent editorial<sup>13</sup> highlighted the necessity of further and repeated evaluations to enhance the credibility and accountability of existing schemes and to identify those which deserve scale-up. The Aarogyasri and RSBY schemes and the other recent health sector innovations in AP and

1  
2  
3 Maharashtra which form the major backdrop and complex health care architecture against which  
4 these have been launched, and which may have contributed to the changes in outcomes we have  
5 explored in our study, are described below.  
6

#### 7 *The Rajiv Aarogyasri Health Insurance Scheme of AP*

8 In 2007 AP launched a pioneering new state-wide fully state-funded health insurance scheme, the  
9 Rajiv Aarogyasri Community Health Insurance Scheme (Aarogyasri)<sup>11</sup> to provide treatment for  
10 serious and life-threatening illnesses. The specific objectives include: to improve access of poor  
11 families to quality medical care (meaning low-frequency, high cost specialist care) and treatment of  
12 identified diseases requiring hospitalisation through an identified network of health care providers,  
13 to provide financial cover for catastrophic illnesses which have the potential to wipe out life time  
14 savings of poor families and to provide 'universal coverage to the urban and the rural poor in the  
15 state'<sup>14</sup> albeit for the conditions covered in the benefits package. All families with a 'below poverty  
16 line' (BPL) ration card, i.e. those on an annual income below USD 1384 (INR 75,000) in urban areas  
17 and USD 1107 (INR 60,000) in rural areas, and including individuals with pre-existing medical  
18 conditions are *automatically* enrolled and the scheme was estimated to cover approximately 20.4  
19 million poor and lower middle class families, comprising about 85 percent of the state's population  
20 in 2009<sup>9</sup>. Enrollees make no contribution, the annual benefit is a maximum of USD 4,500 (INR  
21 200,000) per family per year and there is no limit on the size of the family<sup>14</sup>. A total of 942 medical  
22 and surgical procedures across 31 clinical specialties<sup>14</sup> are provided and the benefits include all  
23 inpatient costs - associated investigations, food, transport and medicines for 10 days following  
24 discharge. One year follow-up packages including consultation, medicines, and diagnostics are also  
25 available for 125 procedures requiring longer periods of follow up<sup>9</sup>. Aarogyasri has unique features  
26 including *Aarogyamithras* (health system navigators), outreach *health camps* delivered by  
27 participating hospitals to educate, screen and case-find and a state-of-the-art information  
28 technology-based management system. At the time of this study, 353 public and private sector  
29 hospitals were 'empanelled' to provide services to Aarogyasri beneficiaries.  
30  
31

32  
33 In 2009, a descriptive study of *Aarogyasri*, based on an analysis of claims data and a survey of  
34 beneficiaries<sup>15</sup>, concluded that while the scheme was beginning to reach its intended beneficiaries  
35 uptake was lower among scheduled castes and tribes. This was confirmed by Fan and colleagues<sup>16</sup>,  
36 who used variations in programme roll-out over time and districts to evaluate the scheme using  
37 National Sample Survey data collected before and after its launch. They reported reduced out-of-  
38 pocket expenditure in this initial phase but no major impact on catastrophic healthcare expenditure.  
39 Inspired by Aarogyasri and mindful of the political benefits of introducing popular health reforms,  
40 other states have launched health financing innovations similar to this model.  
41

#### 42 *RSBY in Maharashtra*

43  
44 RSBY was launched across a number of states by the Ministry of Labour, Government of India (GOI)  
45 in 2008<sup>17</sup> and provides access to free inpatient hospital care up to USD 550 (INR 30,000) per family  
46 per year<sup>18</sup>. Households which meet the criteria based on the much more limiting definition of  
47 poverty and numbers of poor families provided for each State by the GOI Planning Commission are  
48 eligible to enrol, and pay a contribution of USD 0.55 (INR 30) at registration and at each annual  
49 renewal<sup>9</sup>. Up to 5 family members, including those with pre-existing conditions can be covered, and  
50 personal information including biometric data are collected prior to the issue of a smart card with  
51 encoded details of the family. 700 procedures covering 18 broad categories of interventions which  
52 would generally be included under the umbrella of 'secondary' care, are provided and the benefit  
53 packages include the intervention, public transport costs limited to 1.8 USD (INR 100) per visit and  
54 18.2 USD (INR 1000) per year and post-hospitalization drugs for 5 days. Networked hospitals are  
55 required to provide free outpatient consultations (which have only recently been introduced.  
56 Personal communication, Kurian OC) but other costs such as ambulatory diagnostics and medicines  
57  
58  
59  
60

1  
2  
3 have to be borne by the beneficiaries, except if investigations lead to inpatient admissions within a  
4 day<sup>9</sup>. A pilot of the RSBY scheme was launched in 1 district of AP, but only after the start of our  
5 household survey.  
6

7  
8 In Maharashtra, enrolment began in Aug 2009, and by mid 2013, approximately 2 million of the  
9 eligible 4 million families were enrolled in the scheme<sup>12</sup> which is being implemented in 31 of 35  
10 districts in the state. Enrolment had extended to 26 districts prior to June 2012, when our household  
11 survey began. Notably, only 15 out of 1215 hospitals contracted for RSBY funded services are from  
12 the public sector<sup>12</sup>. Early assessments of the scheme's impact nationally, suggest that although the  
13 rate of hospitalisations has increased, awareness of the scheme was poor and remains a barrier to  
14 uptake. Notable variations in enrolment and scheme awareness were also observed by a descriptive  
15 study of RSBY conducted in the Amravati district of Maharashtra which has a large tribal  
16 population<sup>19</sup>. In Maharashtra<sup>17</sup>, utilisation rates have been reported to be lower than in other states  
17 and the male:female enrolment ratio is 6.5:3.5.  
18

#### 19 *Other major health sector initiatives in AP and Maharashtra*

20 Both states have a complex health care landscape with numerous programmes in place. There are  
21 several initiatives launched during the past decade, some of which are common to both states and  
22 driven by national strategies, and others owe their existence to state-level enterprise, innovation  
23 and political support. The most notable programmes with the potential to impact on in patient care  
24 are described below.  
25

26  
27 The National Rural Health Mission (NRHM) was launched in 2005 nationwide, with a key aim of  
28 reducing maternal and infant mortality<sup>20</sup>. Government reports suggest that its notable achievements  
29 include an increase in institutional deliveries; in AP from 1.25 million in 2005-06 to 1.46 million by  
30 2011-12<sup>21</sup> and in MH from 1.1 million to 1.63 million<sup>22</sup>, achieving an institutional delivery rate of  
31 approximately 92 percent in both states. Also common to both states is the '104 health information  
32 help line' launched in AP in 2008 and MH in 2011<sup>23</sup>, to provide medical advice and information based  
33 on validated algorithms and disease summaries, direct callers to appropriate health facilities or to  
34 receive a complaint against a public sector health facility. In AP the help line and call centre were  
35 subsumed within the Aarogyasri infrastructure by 2011.  
36

37  
38 In MH, the RSBY was preceded by the Jeevandayee scheme launched in 1997 with the objective of  
39 reducing catastrophic OOPE on inpatient care in the BPL population<sup>24</sup>. Potential beneficiaries were  
40 required to apply for funding after a diagnosis was confirmed and the scheme covered serious illness  
41 such as cardiac and renal disease and cancer. However, the scheme uptake has been low, and while  
42 it has continued to run in parallel to the RSBY, only 66,853 procedures (4456 procedures per year in  
43 a state with 112.37 million people) have been approved during the scheme's lifetime<sup>25</sup>. Since 2006,  
44 MH has also had a scheme in place which mandated 20% of the beds in private hospitals to be made  
45 available for free or at subsidized rates to poor patients (personal communication, Kurian OC). It has  
46 been estimated that around 10,000 private beds are available for the poor across MH, equivalent to  
47 approximately 20% of the total bed capacity of the public sector. Although the implementation of  
48 the scheme is reported to be erratic (Kurian OC), it may have had some positive impact on access to  
49 hospital inpatient care for serious illness.  
50

51  
52 Launched in 1995-96, the Navasanjeevani Yojana scheme is exclusive to the 15 tribal districts of MH  
53 and was to improve maternal and infant mortality in these vulnerable populations<sup>26</sup>. It has focused  
54 on strengthening primary health and nutrition services and access to safe drinking water.

55  
56 A service available in AP but not in MH is the '108' scheme, launched in 2005 to provide a state-of-  
57 the-art medical emergency response service<sup>27</sup>. At the time of our study, 802 ambulances catered to  
58 approximately 3,500 emergencies per day<sup>28</sup>.  
59  
60

## OBJECTIVES OF THE STUDY

Our objective was to compare the effects of health innovations over time on access to and OOPE on inpatient care in AP and MH and to assess whether the AP initiatives had larger or smaller beneficial effects than those found in MH. These differential effects are likely to be substantially due to the Aarogyasri scheme in AP and the RSBY in MH. In this paper, we report findings from a study which compared these **trendschanges**. The findings do not allow us to draw inferences on the impacts of individual initiatives, but nevertheless contribute new knowledge on the impact and role of the innovations, provide lessons for other programmes, and strengthen the evidence base for policy on UC in India.

## METHODS

### Overview

None of the aforementioned initiatives – including the Aarogyasri and RSBY schemes in which we are especially interested – was piloted in a systematic way, let alone via a carefully designed randomized control trial. Following MRC Guidance<sup>29,30</sup> and best practice we therefore opted for a **quasi experimentalcross-sectional survey** design in which we seek to minimise selection bias, to control for confounding variables and to reduce the effects of chance. Specifically, we compare changes in hospital inpatient care related expenditures and behaviours (HREB) in AP and MH before and after the rollout of the Aarogyasri scheme in AP and the RSBY scheme in MH. The difference in changes between AP and MH is not an estimate of a specific initiative. Rather it tells us whether, on balance, the AP initiatives have had larger (or smaller) beneficial effects than the MH initiatives, and if so how much more (or less) beneficial they have been. Since the NRHM was common to both states and the MH-specific initiatives were quite small in scale or unlikely to affect HREBs, any difference in change between the two states is quite likely to be mainly due to differential effects of the Aarogyasri and RSBY programmes.

AP and MH have a broadly similar development profile as shown by the data below. AP's other socio-economically similar neighbouring states of Karnataka and Tamil Nadu had already introduced Aarogyasri-like schemes, and Odisha and Chattisgarh the only other neighbours, had comparatively higher levels of socio-economic deprivation. HREBs were measured in both AP and MH by two waves of household survey before (2004) and after (2012) the introduction of Aarogyasri and RSBY. The study protocol and questionnaire for the 2012 survey were reviewed and agreed by the Research Ethics Committee of the Administrative Staff College of India, Hyderabad.

| Maharashtra | Indicator                                                   | Andhra Pradesh |
|-------------|-------------------------------------------------------------|----------------|
| 112.37      | Population (2011 census, in millions)                       | 84.66          |
| 10.20       | % Schedule Caste ( 2001 Census)*                            | 16.60          |
| 8.90        | % Schedule tribe ( 2001 census)*                            | 6.20           |
| 101,314     | Per capita income 2011-12 (in INR)**                        | 71,540         |
| 35          | Number of districts                                         | 23             |
| 5,314       | Households covered in NSSO 60 <sup>th</sup> round (2004-05) | 5,059          |
| 10,073      | Households covered in the study 2012                        | 8,623          |

\*Note that 2011 census data for social groups are not yet published

\*\*Source: Presentation on Annual Plan 2012-13 and Five Year Plan 2012-17<sup>31</sup>

### Survey design

#### Baseline Survey : 2004

We used the original data from the National Sample Survey Organization (NSSO) 60<sup>th</sup> decennial round household survey undertaken in 2004<sup>32</sup> to estimate baseline HREB estimates for AP and MH (Table 1). This was the most recent round measuring morbidity profiles, use of health care services including hospitalised and non-hospitalised treatments and expenditures incurred. The household survey used a multi-stage stratified sampling methodology to identify a representative random population sample and an interviewer completed questionnaire to obtain measures of HREB along with socio-demographic, household expenditure and other information.

#### Follow up survey: 2012

We used the same household survey design and methods to collect post-intervention data in AP and MH as those used by NSSO. Briefly, the household survey used a multi-stage stratified sampling methodology with the 'First Stage Units' (FSUs) identical to those used by NSSO in their 66th round (2008-09)<sup>33</sup>, the latest round for which FSUs had been mapped. However, the FSUs were not the same as those in NSSO 2004, our baseline survey, rapid urbanisation having changed substantially, the urban-rural landscape of both states and thus the geographical basis for sampling units.

**Table 1: Urban and rural populations and households surveyed in 2004 and 2012 in Andhra Pradesh and Maharashtra**

|                                   | Andhra Pradesh             |                    | Maharashtra                |                    |
|-----------------------------------|----------------------------|--------------------|----------------------------|--------------------|
|                                   | NSSO 60th round<br>2004-05 | Our survey<br>2012 | NSSO 60th round<br>2004-05 | Our survey<br>2012 |
| Population                        | 76,210,007*                | 84,665,533**       | 96,878,627*                | 112,372,972**      |
| Urban population                  | 20,808,940*                | 28,353,745**       | 41,100,980*                | 50,827,531**       |
| Rural population                  | 55,401,067*                | 56,311,788 **      | 55,777,647*                | 61,545,441**       |
| Total households (urban)          | 4,397,138*                 | 6,778,225**        | 8,403,224*                 | 10,813,928**       |
| Total households (rural)          | 12,607,167*                | 14,246,309**       | 11,173,512*                | 13,016,652**       |
| Total households                  | 17,004,305*                | 21,024,534**       | 19,576,736*                | 23,830,580**       |
| FSUs (urban)                      | 183                        | 372                | 267                        | 504                |
| FSU (rural)                       | 325                        | 491                | 265                        | 504                |
| Total households surveyed (urban) | 1824                       | 3715               | 2664                       | 5038               |
| Total households covered (rural)  | 3235                       | 4908               | 2650                       | 5035               |

\*2001 census \*\* 2011 census

FSU - First Stratum Unit

The NSSO 66th round had 492 rural FSUs in AP, but 1 FSU was found to be uninhabited.



1  
2  
3  
4  
5  
6  
7  
8  
9  
10 The interviewer completed household survey questionnaire was pre-tested and then piloted in both  
11 states prior to the survey. All respondents provided written informed consent for participation.  
12 Questions addressed the following: household composition and socio-demographic characteristics  
13 of members, household expenditure, and health expenditure (outpatient and inpatient) and means  
14 of its financing, healthcare seeking behaviour, factors affecting access to healthcare and awareness  
15 and perceptions of the quality of the *Aarogyasri* scheme (AP only). The survey questions in 2012  
16 were identical to those from the NSSO 2004<sup>34</sup>. Additional questions specific to the *Aarogyasri* and  
17 other relevant schemes were also added.  
18

19 A survey of 18696 households across 2 states and 1871 locations within the states is a challenging  
20 undertaking. The survey design had several features intended to assure the quality of data collected.  
21 Few academic institutions have internal capacity to carry out such large surveys, and consequently,  
22 the Social and Research Institute of IMRB International, a leading market research agency was  
23 selected to carry out the survey. The Institute has field survey teams based in every Indian state,  
24 conversant in local languages and dialects and trained to carry out surveys in the socio-economic  
25 development sector. Its clients include Government of India (for whom the national Family Health  
26 Survey data are collected), World Bank and other UN organisations. A group of NSSO consultants in  
27 AP and the Indian Socioeconomic Research Unit, Pune were recruited to support the training of the  
28 field survey teams and data verification.  
29

30 We planned three levels of verification of the study data; the first to be undertaken by the survey  
31 agency, the second to be carried out by the study team and the third, by the agencies mentioned  
32 above. Survey teams for each district were accountable to a field supervisor who was responsible for  
33 checking both the household listing and data entry on a daily basis. The study team also  
34 accompanied the field staff to survey sites on a regular basis. Data collected from 250 households in  
35 each state (approximately 2.5% of the surveyed households) and 186 of the FSU listings  
36 (approximately 10%) were independently verified by the agencies in both the villages and urban  
37 blocks in order to ensure that the sampling method and administration of the questionnaire survey  
38 were being correctly applied. The data entry was carried out by the Institute using a double entry  
39 method and any questionnaires reported incorrect were sent back to the field for re-survey. The  
40 research team carried out a final validation and review of the data.  
41  
42

#### 43 *Outcome measures*

44  
45 *Average inpatient (IP) expenditure per household per year.* Average out-of-pocket expenditure for  
46 inpatient care during 1 year prior to the survey was estimated from questionnaire responses for AP  
47 and MH from both baseline and follow-up data. Reimbursements for inpatient expenditure were  
48 deducted from the total where households had received them.  
49

50  
51 *Large out-of-pocket inpatient expenditure.* Because of the limited data on household consumption in  
52 the 2004 NSSO health survey we did not estimate 'catastrophic health expenditure'. Instead, we  
53 constructed a measure of 'large' out-of-pocket expenditure. The *Aarogyasri* Health Care Trust data  
54 on expenditure incurred by the Government of AP per case in 2012 were examined<sup>14</sup> and the mean  
55 was estimated as USD 419 (INR 23,000). A household was deemed to have incurred 'large'  
56 expenditure if OOPE for inpatient care was equal to or greater than this threshold.  
57  
58  
59  
60

*Large borrowing.* We estimated the total amount borrowed by a household to meet the expenditure of all the inpatient episodes of that family during the previous year. A household was considered to have incurred 'large borrowing' if the borrowing was equal to or exceeded the BPL threshold set by Government of AP: INR 70000 for urban families and INR 65000 for rural households. These prices have been deflated to 2004 levels.

*Hospitalisation rate.* This was estimated as the number of individuals hospitalised during the previous year, per 1000 population.

Variations in outcomes were examined between male and female-headed households, and rural and urban populations, as well as across social groups and economic groups represented by asset quintiles.

Because of the limited data on household consumption in the 2004 NSSO health survey which made the estimation of wealth difficult, we have opted instead to measure household living standards using an asset or wealth index based on information on ownership of household durables, dwelling type, etc., using principal component analysis to estimate weights<sup>35, 36,37</sup> for each indicator. The indicators used were limited to those collected in the 2004 NSSO: type of structure of the dwelling unit, type of toilet, type of fuel used for cooking and source of drinking. Data from the 2004 and 2012 surveys were pooled so that the index captures changes in living standards between the two years; there are therefore more households in the top quintile in 2012 than in 2004. The statistical software Stata 11 was used to generate the index.

*Deflation of follow-up expenditure estimates.*

The 2012 expenditure data including the threshold for large expenditures were deflated using the consumer price index of the Government of India<sup>38</sup> to reflect 2004 prices.

*Analysis*

Our repeat cross-sectional surveys do not allow estimation of within-individual household changes in outcomes over time. Our analysis therefore focused on estimating outcomes averaged across states, and in comparing changes in these over time between AP and MH. If we assume that outcome determinants other than Aarogyasri and RSBY remained stable in the two states over time or followed a parallel ~~trend~~change, then a difference-in-differences (DID) analysis will uncover the net effect of Aarogyasri over and above RSBY.

The difference in differences of outcome ( $Y_{DD}$ ) is

$$(Y_{2012}^{AP} - Y_{2004}^{AP}) - (Y_{2012}^{MH} - Y_{2004}^{MH})$$

where the subscripts and superscripts for Y refer to the respective states and the years when the surveys were done. Confidence intervals were calculated from the standard error  $Y_{DD}$  of and the p-value for the null-hypothesis ( $Y_{DD} = 0$ ) was tested using the Wald test as  $t = \frac{Y_{DD}}{SE_{Y_{DD}}}$  with one degree of freedom.  $Y_{DD}$  was estimated using ordinary least square regression:

$$y_{it} = \beta_0 + \beta_1 state_i + \beta_2 survey_t + \beta_3 (state * survey)_{it} + \sum_{k=1}^m \beta_{3+k} covariate_k + \varepsilon$$

The basic DID results are obtained using the above regression with covariates excluded. The adjusted DID results are obtained using the above regression with m=9 covariates, namely the gender of head of household, a dummy variable capturing whether the household lives in a rural or urban location, three dummy variables capturing the household's social group (the lowest is the excluded category),



and four asset quintile dummies (the bottom is the excluded category). In the regression  $y_{it}$  is the outcome, *state* is a dummy variable with 0 for MH and 1 for AP, and *survey* is a dummy variable with 0 for 2004 survey and 1 for 2012 survey. The coefficient for the interaction term,  $\beta_3$ , gives the differences in differences estimate,  $Y_{DD}$ . Robust standard errors of  $Y_{DD}$  were calculated to account for clustering of households within FSUs using Stata survey commands. A positive value for  $Y_{DD}$  suggested that the change in the outcome in AP was more than the change in MH and the negative value would suggest the reverse.

An advantage of regression based DID estimate is this ability to use co-variables which can account for differential trajectories in the two states. In addition to this we did sub-group analysis stratifying for different co-variables. This is particularly relevant in the case of scheduled tribes whose proportion increased in MH in the follow up survey.

Sub groups were not mutually adjusted for the analysis due to sample size restrictions in relation to some of them.

#### *Role of the funding sources*

The external funding sources had no role in study design, data collection, analysis, interpretation or reporting, or in submission decision.

## RESULTS

A total of 5314 and 5059 households from Maharashtra and AP were surveyed by the NSSO in 2004 (Table 2). Our survey in 2012 included 10073 (MH) and 8623 (AP) households.

**Table 2. Socio-demographic characteristics of baseline and follow-up samples**

| Subgroups                | Number (%) of Households 2004 |                | Number (%) of Households 2012 |                |
|--------------------------|-------------------------------|----------------|-------------------------------|----------------|
|                          | Maharashtra                   | Andhra Pradesh | Maharashtra                   | Andhra Pradesh |
| <b>All</b>               | 5314                          | 5059           | 10073                         | 8623           |
| <b>Head of Household</b> |                               |                |                               |                |
| Male                     | 4785 (90.0)                   | 4433(87.6)     | 8543(84.8)                    | 7418(86.0)     |
| Female                   | 529 (10.0)                    | 626 (12.4)     | 1530 (15.2)                   | 1205 (14.0)    |
| <b>Social Group</b>      |                               |                |                               |                |
| Scheduled Tribes         | 413 (7.8)                     | 296 (5.9)      | 1364 (13.5)                   | 883 (10.2)     |
| Scheduled Castes         | 809 (15.2)                    | 974 (19.3)     | 2235 (22.2)                   | 1797 (20.8)    |
| Other Excluded           | 1644 (30.9)                   | 2317 (45.8)    | 1899 (18.9)                   | 3419 (39.7)    |

|                       |              |              |              |              |
|-----------------------|--------------|--------------|--------------|--------------|
| All other Groups      | 2448 (46.1)  | 1472 (29.1)  | 4571 (45.4)  | 2524(29.3)   |
| <b>Location</b>       |              |              |              |              |
| Rural                 | 2,650 (49.9) | 3235 (63.9)  | 5035(50.0)   | 4908 (57.0)  |
| Urban                 | 2664 (50.1)  | 1824 (36.1)  | 5038 (50.0)  | 3715(43.0)   |
| <b>Asset Quintile</b> |              |              |              |              |
| Lowest                | 1,260 (23.7) | 1,594(31.5)  | 996(9.9)     | 826(9.6)     |
| Second                | 1,016 (19.1) | 1,237 (24.5) | 1,841(18.2)  | 1,286(14.9)  |
| Third                 | 772 (14.5)   | 753(14.9)    | 2,228(22.1)  | 2,121(24.60) |
| Fourth                | 857 (16.1)   | 744(14.7)    | 2,373 (23.6) | 3,072(35.6)  |
| Fifth                 | 1,408(26.5)  | 730(14.4)    | 2,633(26.1)  | 1,318(15.3)  |

### Changes in average in-patient expenditure

Table 3 (top panel) shows average baseline levels of inpatient expenditure. The table also shows the real terms change (deflated to 2004 prices) in these outcomes at follow up and the difference in differences (DID) estimate comparing AP with MH. DID estimates for overall results are shown unadjusted, as well as adjusted for the effects of the covariates. Breakdowns by sex of head of household, social group, urban/rural location and asset quintiles are also shown.

Overall, average inpatient expenditure increased in real terms in both the states between 2004 and 2012, but the increase was significantly greater in MH (unadjusted DID= -498.2 INR, 95% CI= -792.9: -203.5, p=0.0009). The **trend direction in terms** of a greater increase in MH was evident across all sub groups of analysis except the richest asset quintile. However, the DID estimates reached significance in male headed households (DID=-513.7INR, 95% CI= -843.9: -183.4, p=0.0023), scheduled castes (DID= -708.7INR, 95% CI=-1234.3: -183.2, p=0.0082), all 'other' social groups (DID=-1110.46INR, 95% CI=-1868 : -352.9, p=0.0041), rural households (DID= -504 INR, 95% CI= -801.9: -206.0, p=0.0009) and the poorest (DID= -1001.3 INR, 95% CI= -1751: -251.7, p= 0.0089) and middle asset quintiles (DID= -798.1 INR, 95% CI= -1362.9:-233.3, p= 0.0056).

**Table 3: Change in average inpatient expenditure (in INR) in Maharashtra and Andhra Pradesh between 2004 and 2012**

| Subgroups                              | Baseline Mean (95% CI) |                    | Change 2004:2012 Mean (95% CI) |                      | DID                                  |        |
|----------------------------------------|------------------------|--------------------|--------------------------------|----------------------|--------------------------------------|--------|
|                                        | Maharashtra            | Andhra Pradesh     | Maharashtra                    | Andhra Pradesh       | Mean (95%CI)                         | p      |
| <b>Household inpatient expenditure</b> |                        |                    |                                |                      |                                      |        |
| All                                    | 1091.6(978.4:1204.8)   | 723.5(527.5:919.5) | 942.8(749.9:1135.6)            | 444.55(221.5: 667.6) | -498.2(-792.9:-203.5)                | 0.0009 |
|                                        |                        |                    |                                |                      | <b>DID (adjusted for covariates)</b> |        |
|                                        |                        |                    |                                |                      | -565.8(862.9: -268.6)                | 0.0002 |

| Head of Household   |                         |                      |                       |                        |                        |        |
|---------------------|-------------------------|----------------------|-----------------------|------------------------|------------------------|--------|
| Male                | 1,132.9(1015:1,251)     | 758(419.7:1,096.3)   | 935(727:1,143.01)     | 1074.9(555.9:1593.8)   | -513.7(-843.9:-183.4)  | 0.0023 |
| Female              | 757.1(555.5:1014.6)     | 341.1(222.3:460.01)  | 421.3(164.7:678.0)    | 589.9(307.22:872.8)    | -484.9(-1075.6:105.9)  | 0.1076 |
| <b>Social Group</b> |                         |                      |                       |                        |                        |        |
| Scheduled Tribes    | 376.6(231.7:521.6)      | 432.7(212.52:652.9)  | 1153.1(803.3:1502.9)  | 675.2(163.2:1187.2)    | -477.9(-1097.7:142)    | 0.1307 |
| Scheduled Castes    | 696.7(500.2:893.2)      | 432.6(305.6:559.4)   | 1464.1(1039.9:1888.4) | 755.4(444.9:1065.9)    | -708.7(-1234.3:-183.2) | 0.0082 |
| Other Excluded      | 1,028.6(838.4:1218.8)   | 562.4(463.7:662)     | 928.9(532.9:1324.9)   | 767.9(569.6:966.2)     | -161(-603.7:281.7)     | 0.4758 |
| All other Groups    | 1,424.5(1,222.3:1626.7) | 1306.2(627.8:1984.6) | 734.9(427.9:1041.7)   | -375.6(-1,068.5:317.4) | -1110.46(-1868:-352.9) | 0.0041 |
| <b>Location</b>     |                         |                      |                       |                        |                        |        |
| Rural               | 897.8(768.1:1027.5)     | 571.4(496.2:646.6)   | 1084.7(826.3:1343.1)  | 580.7(432.2:729.2)     | -504(-801.9:-206.0)    | 0.0009 |
| Urban               | 1343.5(1146.1:1540.9)   | 1113.5(466.2:1760.8) | 753.6(458.7:1048.6)   | 92.3(-586.92:771.5)    | -661.3(-1401.5:78.864) | 0.0799 |
| <b>Quintile</b>     |                         |                      |                       |                        |                        |        |
| poorest             | 656.3(498.0:814.6)      | 391.5(319:464.1)     | 1692.5(1053.3:2331.7) | 691.2(298.9:1083.5)    | -1001.3(-1751:-251.7)  | 0.0089 |
| 2nd                 | 786.5(583.5:989.5)      | 443.3(356.5:530.2)   | 979.3(599.4:1359.2)   | 839.5(465.7:1213.3)    | -139.8(-672.5:393)     | 0.607  |
| middle              | 1062.7(738.8:1386.1)    | 862.1(577.8:1146.5)  | 1011.8(550.2:1473.4)  | 213.7(-112.1:539.6)    | -798.1(-1362.9:-233.3) | 0.0056 |
| 4th                 | 1241.7(894.4:1589.1)    | 1819(337.5:3302.5)   | 803.6(328.7:1278.5)   | -644.3(-2128.3:839.7)  | -1447.9(-3005.2:109.5) | 0.0684 |
| richest             | 1818.6(1505.5:2131.8)   | 908.3(682.1:1133.4)  | 252.3(-193.4:698.1)   | 362.1(15.3:708.9)      | 109.7(-454.80:674.3)   | 0.7031 |

### Large expenditures for inpatient care

Proportions of households incurring large expenditures showed an increase in both states (Table 4), but the increase was smaller in AP for the sample as a whole as well as for all the groups except for the second asset quintile. The DID was strongly significant for the households overall (adjusted DID=-1.8, 95% CI: -3:-0.7, p= 0.0009), but this was not observed for any of the sub groups of analysis.

**Table 4: Change in the proportion (%) of households incurring large health expenditures for inpatient care in Maharashtra and AP between 2004 and 2012**

| Subgroups | Baseline Mean (95% CI) | Change 2004:2012 Mean (95% CI) | DID |
|-----------|------------------------|--------------------------------|-----|
|-----------|------------------------|--------------------------------|-----|

|                                                                  | Maharashtra    | Andhra Pradesh | Maharashtra    | Andhra Pradesh    | Mean (95%CI)                         | p      |
|------------------------------------------------------------------|----------------|----------------|----------------|-------------------|--------------------------------------|--------|
| <b>Large IP expenditure (INR 23000 deflated to 2004 figures)</b> |                |                |                |                   |                                      |        |
| <b>All</b>                                                       | 6.7(6.7:7.3)   | 3.4(2.9:3.9)   | 3.1(2.1:4.1)   | 2.2(1.5:2.8)      | -0.91(-2.1:0.27)                     | 0.1302 |
|                                                                  |                |                |                |                   | <b>DID (adjusted for covariates)</b> |        |
|                                                                  |                |                |                |                   | -1.8(-3:-0.7)                        | 0.0009 |
| <b>Head of Household</b>                                         |                |                |                |                   |                                      |        |
| Male                                                             | 6.8(6.2:7.6)   | 3.5(3.1:4)     | 3.1(2.0:4.1)   | 2.1(1.5:2.9)      | -0.8(-2.1:-0.4)                      | 0.1928 |
| Female                                                           | 5.0(3.7:6.4)   | 2.8(1.9:3.7)   | 3.9(2:5.8)     | 2(6.6:3.4)        | -1.8(-4.2:0.50)                      | 0.1222 |
| <b>Social Group</b>                                              |                |                |                |                   |                                      |        |
| Scheduled Tribes                                                 | 2.2(1.3:3.1)   | 1.4(0.5:2.2)   | 5.3(3.5:7)     | 3.5(1.9:5.1)      | -1.7(-4.1:0.61)                      | 0.1478 |
| Scheduled Castes                                                 | 6.1(4.6:7.7)   | 2.1(1.5:2.6)   | 4.3(2.3:6.3)   | 3(1.9:4.1)        | -1.2(-3.5:1.01)                      | 0.2785 |
| Other Excluded                                                   | 5.9(4.7:7.0)   | 3.3(2.7:3.8)   | 2.9(1.1:4.6)   | 2.7(1.7:3.6)      | -2.1(-2.2:1.8)                       | 0.8389 |
| All other Groups                                                 | 8.3(7.5:7.9)   | 5.4(4.4:6.3)   | 2.2(0.9:3.6)   | 0.51(-0.7:1.7)    | -1.7(-3.5:0.04)                      | 0.0628 |
| <b>Location</b>                                                  |                |                |                |                   |                                      |        |
| Rural                                                            | 1.9(1.5:2.2)   | 0.9(0.79:1.1)  | 1.7(1.1:2.3)   | 1.3(0.09:1.6)     | -0.45(-1.1:0.25)                     | 0.2098 |
| Urban                                                            | 12.9(11.9:14)  | 9.7(8.9:10.7)  | 4.4(3.0:5.7)   | 3.9(2.6:5.3)      | -0.7(-2.4:1.5)                       | 0.6350 |
| <b>Quintile</b>                                                  |                |                |                |                   |                                      |        |
| poorest                                                          | 1.8(1.3:2.4)   | 1.1(0.8:1.4)   | 3.7(2.2:5.2)   | 1.7(0.7:2.7)      | -0.2(-3.8:-0.19)                     | 0.0307 |
| 2nd                                                              | 2.7(1.9:3.5)   | 1.2(0.9:1.5)   | 2.1(0.93:3.3)  | 2.2(1.4:3.1)      | 0.9(-1.4:1.6)                        | 0.9079 |
| middle                                                           | 6.9(4.9:8.9)   | 4.2(3.1:5.3)   | 1.3(-1:3.6)    | 0.9(-1.2:1.4)     | -1.2(-3.9:1.4)                       | 0.3596 |
| 4th                                                              | 10.7(8.7:12.6) | 7.6(5.9:9.2)   | 1.8(-0.57:4.3) | -0.036(-1.9:1.80) | -1.9(-4.9:1.2)                       | 0.2268 |
| richest                                                          | 13.5(12:14.9)  | 9.6(8.1:11.2)  | 0.3(-1.6:2.2)  | -0.6(-2.8:1.6)    | -0.9(-3.7:2)                         | 0.5601 |

### Changes in large borrowing for inpatient care

In both states proportions of households incurring large borrowings to meet inpatient expenses increased from 2004 to 2012 (Table 5). However, there was a consistent pattern of smaller increases in AP for the overall population, as well as all subgroups (except the richest asset quintile) with DID's strongly significant for the overall population (adjusted DID=-4, 95% CI: -6.6:-1.4, p= 0.0032), scheduled tribes (DID= -5.5, 95% CIs:-9.3:-1, p= 0.0048), rural households (DID= -4.7, 95% CIs: -7.3 : -2.1, p= 0.0007) and all asset quintiles except the richest (the poorest asset quintile DID= -9.0, 95% CI: -14.0: -4.4, p=0.0002).

**Table 5: Change in the proportion (%) of households large borrowings for in-patient care in Maharashtra and AP between 2004 and 2012**

| Subgroups                                               | Baseline Mean (95% CI) |                | Change 2004:2012 Mean (95% CI) |                | DID               |        |
|---------------------------------------------------------|------------------------|----------------|--------------------------------|----------------|-------------------|--------|
|                                                         | Maharashtra            | Andhra Pradesh | Maharashtra                    | Andhra Pradesh | Mean (95%CI)      | p      |
| <b>Proportion of households having large borrowings</b> |                        |                |                                |                |                   |        |
| <b>All</b>                                              | 7.5(6.7:8.2)           | 3.8(3:4.5)     | 8.9(6.8:11)                    | 5.3(3.4:7.2)   | -3.7(-6.4:-0.908) | 0.0100 |

|                          |                    |                    |                     |                     | DID (adjusted for covariates) |        |
|--------------------------|--------------------|--------------------|---------------------|---------------------|-------------------------------|--------|
|                          |                    |                    |                     |                     | -4(-6.6:-1.4)                 | 0.0032 |
| <b>Head of Household</b> |                    |                    |                     |                     |                               |        |
| Male                     | 7.8(7.0:8.5)       | 3.9(3.1:4.7)       | 9.8(6.6:1.3)        | 5.3(3.3:7.3)        | -3.6(-6.6:-0.62)              | 0.0187 |
| Female                   | 5(3:7)             | 2.9(1.7:4.1)       | 8.(6.6:11.2)        | 5(2.9:7.23)         | -4.7(-8.3:-1)                 | 0.0137 |
| <b>Social Group</b>      |                    |                    |                     |                     |                               |        |
| Scheduled Tribes         | 3.6(2.3:4.9)       | 2.4(0.93:3.9)      | 11(8.9:14)          | 5.8(2.8:8.8)        | -5.5(-9.3:-1.8)               | 0.0048 |
| Scheduled Castes         | 7.2(5.5:8.8)       | 3(1.7:4.2)         | 9.6(6.6:13)         | 5.8(3.4:8.3)        | -3.8(-7.5:0.03)               | 0.0518 |
| Other Excluded           | 8.0(6.8:9.2)       | 3.5(2.7:4.4)       | 8(5.8:10.3)         | 5.3(3.2:7.4)        | -2.8(-5.7:0.19)               | 0.0661 |
| All other Groups         | 8(7.15:8.8)        | 0.052(.040:0.064)  | 8.8(5.9:12)         | 4.7(2.2:7.4)        | -4.1(-7.9:-.4.0)              | 0.0302 |
| <b>Location</b>          |                    |                    |                     |                     |                               |        |
| Rural                    | 6.5(5.6:7.5)       | 0.03(0.024:0.038)  | 10(8.5:12)          | 5.8(3.9:7.6)        | -4.7(-7.3:-2.1)               | 0.0007 |
| Urban                    | 8.7(7.3:10)        | 0.056(0.048:0.064) | 7.0(4.5:9.5)        | 4(1.1:6.9)          | -3.0(-6.7:0.68)               | 0.1081 |
| <b>Quintile</b>          |                    |                    |                     |                     |                               |        |
| poorest                  | 5.2(3.9:6.5)       | 0.025(0.016:0.033) | 12.1(7.8:16)        | 3.1(1.3:0.049)      | -9(-14:-4.4)                  | 0.0002 |
| 2nd                      | 0.064(0.048:0.08)  | 0.027(0.021:0.032) | 0.095(0.070:0.12)   | 0.052(0.034:0.070)  | -0.043(-.073:-.013)           | 0.0062 |
| middle                   | 0.074(0.050:0.098) | 0.048(0.031:0.065) | 0.10(.073:0.133)    | 0.044(0.013:0.076)  | -0.059(-.100:-.017)           | 0.0069 |
| 4th                      | 0.087(0.063:0.110) | 0.06(.041:0.078)   | 0.083(0.061:0.104)  | 0.039(0.014:0.064)  | -0.044(-.075:-.012)           | 0.0076 |
| richest                  | 0.10(0.090:0.12)   | 0.064(0.049:0.079) | 0.045(0.0035:0.086) | 0.049(-.0068:0.105) | 0.0045(-.062:0.071)           | 0.8937 |

### Hospital utilisation for in-patient care

Overall, hospitalisation rates have increased in both AP and Maharashtra (Table 6) but more so in AP (5.6 per 1000 population vs 2.2), although the DID was not statistically significant. The sub group analysis presented a mixed picture. For both male and female headed households there was a greater increase in hospitalisation in AP, but this reached moderate statistical significance only for female headed households (DID=27.6, 95% CI =1.1:54.1, p-value = 0.0415). There is an increase in hospitalisations among scheduled tribes in Maharashtra and a reduction in AP (DID = -19.8, 95% CI = -37.3: -2.3, p-value = 0.0272) but the opposite **trend picture** was seen among 'other excluded' groups with an increase in AP and a reduction in MH (DID = 12.5, 95% CI= 1.2:23.9 p-value = 0.0309). In scheduled castes hospitalisations had increased in both states but more so in AP, while in the 'other' group there was a small increase in MH and a small reduction in AP. In the poorest quintile, the increase in hospitalisation was significantly greater in MH (DID= -14.4, 95%CI=-28:-0.31, p= 0.0451).

**Table 6: Changes in hospitalisation (per 1000 population) in Maharashtra and AP between 2004 and 2012**

| Subgroups                                   | Baseline Mean (95% CI) |                | Change 2004:2012 Mean (95% CI) |                | DID          |   |
|---------------------------------------------|------------------------|----------------|--------------------------------|----------------|--------------|---|
|                                             | Maharashtra            | Andhra Pradesh | Maharashtra                    | Andhra Pradesh | Mean (95%CI) | p |
| <b>Hospitalizations per 1000 population</b> |                        |                |                                |                |              |   |

|                          |                     |                  |                     |                   |                       |        |
|--------------------------|---------------------|------------------|---------------------|-------------------|-----------------------|--------|
| All                      | 41.3(37.3:45.2)     | 31.5(27.8:35.3)  | 2.2 (-4.7:9.1)      | 5.6(-1.1:12.3)    | 3.4( -5.9 :12.7)      | 0.4636 |
|                          |                     |                  |                     |                   | <b>DID (adjusted)</b> |        |
|                          |                     |                  |                     |                   | 0.7(-8.6:10.2)        | 0.8685 |
| <b>Head of Household</b> |                     |                  |                     |                   |                       |        |
| Male                     | 41.0(37.1:44.9)     | 31.7 (16.9:34.0) | 1.9( -5.1:8.8)      | 4.4( -2.4:11.1)   | 2.5( -6.9:11.9)       | 0.5966 |
| Female                   | 51.6 (30.6:72.5)    | 25.5(27.7:35.7)  | 13.9( -7.53:35.4)   | 41.5 ( 24.6:58.4) | 27.6( 1.1:54.1)       | 0.0415 |
| <b>Social Group</b>      |                     |                  |                     |                   |                       |        |
| Scheduled Tribes         | 23.7(14.2 :33.1615) | 35.5(21.9:49.1)  | 17.1(5.8:28.5)      | -2.7(-16.95:11.5) | -19.8(-37.3: -2.3)    | 0.0272 |
| Scheduled Castes         | 42.4(36.3:48.4)     | 29.5(22.6:36.5)  | 3.9(-7.9:15.7)      | 7.6( -2.6:17.7)   | 3.7( -11.4:18.7)      | 0.6268 |
| Other Excluded           | 44.2(38.2:50.2)     | 29.9( 25.5:34.3) | -1.9(-11.2 :7.3109) | 10.6(3.4:17.8)    | 12.5(1.2:23.9)        | 0.0309 |
| All other Groups         | 42.5(37.1:47.9)     | 34.9(29.0:40.9)  | 0.93(-7.3:9.1)      | -1.1(-9.4: 7.4)   | -2.0( -13.5 :9.4)     | 0.7235 |
| <b>Location</b>          |                     |                  |                     |                   |                       |        |
| Rural                    | 36.6(32.2:41)       | 28.9(26.4:31.5)  | 9.5(3.5:15.4)       | 8.8(2.2:15.3)     | -0.69( -9.3:7.9)      | 0.8725 |
| Urban                    | 48.2(43.7:53)       | 38.2(35.5:41.2)  | -7.9(-14.5: -1.3)   | -2.5( -12.1:7.1)  | 5.4(-5.8:16.6)        | 0.3358 |
| <b>Quintile</b>          |                     |                  |                     |                   |                       |        |
| poorest                  | 31.4(25.9:36.9)     | 27.5(22.8:32.1)  | 20.7(9:32.8)        | 6.4( -1.7:14.4)   | -14.4(-28:-0.31)      | 0.0451 |
| 2nd                      | 36.5(28.3:44.7)     | 27.1(21.9:32.4)  | 8(0.5:15.4)         | 8.9( -5.6:18.4)   | 0.9( -10 : 12.5)      | 0.8746 |
| middle                   | 47.8(33.6:62.1)     | 35.3(29.0:41.6)  | -1.5(-17.9:14.8)    | 4.1(-.56:13.7)    | 5.6( -12.8:24.0)      | 0.5457 |
| 4th                      | 46.9(39.9:53.9)     | 41.7(32.7:50.8)  | -4.0( -12:3.4)      | -5.1( -15.7:5.4)  | -0.75( -13.3:11.9)    | 0.9056 |
| richest                  | 51.0(46:56.1)       | 36.5(25.8:47.2)  | -13.1(-18.9: -7.1)  | 1.5( -19.5:22.6)  | 15.0( -5.8: 3.6)      | 0.1665 |

### LIMITATIONS OF THE STUDY

Difference in differences estimations aimed at assessing the impacts of interventions, assume that both populations demonstrate similar characteristics prior to the start of the intervention, and that 'unobservables' follow a common trend; under such circumstances, any differences in changes observed over time between the 2 populations are attributable to the interventions<sup>39, 40</sup>. Despite AP and Maharashtra having broadly similar socio-economic profiles, as well as our DID analysis taking account of a number of covariates, there may have been other factors resulting in unobserved differential changes between the 2 populations and to which the results of the DID analysis may be at least partially attributable.

A second limitation could arise from the impact of other public health programmes implemented during the period 2004 to 2012. The most significant of these is the National Rural Health Mission launched in 2005, mainly to improve maternal and child health through the revitalization of rural primary care and child and maternal health services. A key assumption of our study is that the impacts of the NRHM in terms of healthcare expenditure for maternal and child health care would have been similar in both states, as this was a nationwide development. Despite the improvements in the public sector maternal and child health services sought by the NRHM, it is widely recognised that the public, including BPL families, continues to pay OOP for private health care. We have assumed that this behaviour is likely to be similar across the 2 states. Other health initiatives such as the Navsanjeevani Yojana and HMRI were unlikely to have had an impact on inpatient care or

1  
2  
3 expenditure. The 108 scheme had the potential, in AP, to influence hospitalisation rates, by helping  
4 more households to visit hospitals when seriously ill. But the effect is likely to be small as the  
5 majority of even serious illnesses do not result in a 108 call for transport. The implementation of the  
6 RSBY and the scheme to make private hospital beds available for the poor in MH may have diluted  
7 the DID, although both schemes are known to have been only partially implemented.  
8

9  
10 Lastly, the 2004 NSSO survey which served as our baseline, was carried out between January and  
11 June 2004. Our end-line 2012 survey was carried out over a period of 3 months from June to  
12 September. The morbidity and mortality patterns recorded in different time periods may vary, and  
13 could have influenced the data.

## 14 DISCUSSION

15  
16 We found that average expenditure, large expenditures and large borrowings on inpatient care had  
17 increased in both MH and AP, but the increase was consistently smaller in AP across these 3  
18 outcome measures, and may be suggestive of Aarogyasri having a somewhat larger effect than RSBY.  
19 Similar increases in institutional deliveries across the 2 states, and low levels of utilisation of RSBY  
20 and Jeevandayee schemes in MH may further strengthen this explanation.  
21

22  
23 The increase in average OOPE on inpatient care in AP and MH reflects a **trend pattern** observed  
24 nationwide<sup>16,41</sup>. The Aarogyasri scheme may have contributed to the more favourable trajectory in  
25 AP both directly and indirectly, in that the scheme may have contributed to a reduction in the prices  
26 of interventions and an increase in competition among health care providers. The evaluation of the  
27 Yeshasvini scheme also found a significant reduction in the price of surgical interventions<sup>10</sup>. Our  
28 findings may suggest that the positive effects of Aarogyasri detected by other studies<sup>15,16</sup> at an early  
29 stage of the roll out of the scheme have been sustained. Automatic enrolment into the scheme, near  
30 universality of coverage and no requirement for enrollee contributions may have contributed to the  
31 significant DIDs in male headed households, scheduled castes, rural households and the poorest and  
32 middle asset quintiles. But these benefits were not demonstrated in some of the most vulnerable  
33 groups - female headed households and scheduled tribes. This is consistent with the findings of  
34 other studies<sup>5,16</sup> which reported that the slightly less vulnerable may benefit more from such  
35 schemes, with non-financial barriers undermining access to services for the most vulnerable socio-  
36 economic groups. The case summaries below illustrate the obstacles they face. A similar observation  
37 was reported by the evaluation of the Mexican Seguro Popular health scheme which showed that a  
38 third of the treatment-cluster households who were automatically affiliated were unaware of this  
39 fact<sup>42</sup>.  
40  
41

42 The likely explanation of an Aarogyasri effect may be strengthened by the **trend changes in terms of**  
43 **for** large borrowings which has also increased over time in both states but less so in AP across all  
44 groups of analysis except the richest asset quintile. A multi-country analysis of household  
45 catastrophic health expenditure highlighted that increasing the availability of health services is  
46 critical to improving health in poor countries, but it could also raise the proportion of households  
47 facing catastrophic expenditure unless financial risk protection policies are given a high priority<sup>43</sup>.  
48 Borrowing of comparatively small amounts is less impactful and may be a result of improved access  
49 to financial markets and also supports consumption smoothing. During recent decades, AP has in  
50 particular witnessed a significant rise in microfinance institutions and debt due to high levels of  
51 interest levied by the more recent entrants to this market<sup>44,45</sup>. Nevertheless our results suggest that  
52 increases in large borrowings associated with inpatient health care were smaller in AP. Strongly  
53 significant DIDs in scheduled tribes, rural households and the poorest and second asset quintiles and  
54 moderately significant DIDs in female headed households, scheduled castes, and other excluded  
55 social groups may also point to Aarogyasri beginning to offer greater access to health care when  
56 families are faced with serious illness.  
57  
58  
59  
60



1  
2  
3 In terms of large OOPE, a significant DID was found only for the total households, but the direction  
4 of all DIDs except for the second asset quintile was the same as for average expenditure on inpatient  
5 care and large borrowings, i.e., in favour of AP. It is perfectly possible that the non-significant  
6 differences for the majority of sub groups are due at least in part to the RSBY, the availability of  
7 private sector hospital beds for the poor and the Jeevandayee schemes reducing large OOPE in MH,  
8 and that without these schemes the expenditure would have been greater. In AP, 70 percent of  
9 survey households reported that they were covered by the Aarogyasri scheme, but only 25 percent  
10 of these 'covered' households were aware that the benefit package was limited. It is also possible  
11 therefore that in AP some families seek hospital care assuming that the Aarogyasri scheme provides  
12 comprehensive cover, but are faced with large expenditures when their treatments fall outside the  
13 limits.  
14

15  
16 The mixed picture in relation to the increasing rate of hospitalisations in both states may suggest  
17 that the Aarogyasri and in particular, the RSBY scheme which covers common hospital procedures  
18 are addressing a large hitherto unmet need for inpatient care. The 108 scheme in AP may be an  
19 additional albeit smaller contributor. It may also be explained by a supplier-induced demand. An  
20 assessment of health provider behaviour and governance is an important strand of the evaluation of  
21 health financing schemes<sup>46</sup>, but was outside the remit of our study. We would however strongly  
22 recommend an impact evaluation focusing on health care supply to complement our evidence.  
23 The greater increase in hospitalisation in AP, in female-headed households and 'other excluded  
24 groups', which are two of the most vulnerable population groups, is encouraging. But the reduction  
25 in hospitalisations among scheduled tribes and the poorest asset quintile in AP are of concern and  
26 suggest that if the poor are to secure the benefits appropriated by the near poor or more often by  
27 the rich<sup>47</sup>, the provision of more comprehensive health schemes is essential, which combines the  
28 tertiary and secondary care focus of Aarogyasri and the secondary care benefits of RSBY with  
29 attention paid to minimise barriers such as the widespread influence of illiteracy and lack of  
30 awareness, which limit access to even schemes such as Aarogyasri that are apparently highly  
31 inclusive and non-discriminatory, as well as distance to facilities. Our case summaries illustrate this.  
32 Furthermore, health financing reforms such as the Jamkesmas<sup>48</sup> in Indonesia and the Seguro Popular  
33 in Mexico<sup>42</sup>, both countries similar to India in terms of population and growing economies, include  
34 outpatient and inpatient care, and curative as well as preventive services, suggesting that a more  
35 comprehensive service is possible to implement and worthy of consideration.  
36  
37

38 In summary, health innovations in AP had a greater beneficial effect on hospital inpatient care-  
39 related expenditures than innovations in MH. The Aarogyasri scheme is likely to have contributed to  
40 these impacts in AP, at least in part. But in both states, OOPE increased over time, a trend in keeping  
41 with the picture reported nationwide<sup>49</sup>. Likely explanations are that the poor spend the largest  
42 proportion of OOPE on drugs<sup>50</sup>, an expenditure not adequately addressed by the health financing  
43 schemes including the RAS which provide only 'follow up' medicines for limited periods, after  
44 discharge from hospital. Yet, chronic disease such as diabetes may result in a one-off cardio-vascular  
45 intervention funded by the RAS, but also life-long medication required to be paid for out-of-pocket.  
46 Other possible explanations are medical inflation and rising costs of initial consultation and  
47 diagnostic investigation of symptoms, often in the rapidly growing private sector out-patient  
48 services, prior to hospitalisation under the cover of the RAS or the other health financing schemes.  
49 Hospitalisations also increased, and while it is generally assumed that in developing countries this is  
50 likely to address genuine need, its impact on health status is not known.  
51  
52

### 53 **IMPLICATIONS FOR POLICY AND PRACTICE**

54  
55 Despite these uncertainties, Aarogyasri is perceived, with some justification across India as a  
56 successful scheme, and is being rapidly replicated across the states. Since July 2012, MH too has  
57 joined the list of states offering an Aarogyasri-like scheme, the Rajiv Gandhi Jeevandayee Arogya  
58  
59  
60



1  
2  
3 Yojana<sup>51</sup>. This study has highlighted that such schemes may result in some positive outcomes.  
4 Although the study was not designed to elicit the specific features of the scheme to which any  
5 comparatively greater benefits may be attributable, and which deserve to be replicated in other  
6 states, evidence from systematic reviews<sup>3</sup> points to the need for schemes to be more  
7 'comprehensively' designed to maximise their positive impact. Aarogyasri's design in terms of its  
8 aims to address both financial and non-financial barriers - being fully state funded, the systematic  
9 administrative implementation of Aarogyasri across the state so that it is now almost universal,  
10 automatic enrolment, allowing access to the scheme via a ration card which most poor families own,  
11 the wide spectrum of treatments offered, the large number of health care providers empanelled - is  
12 perhaps responsible as a 'comprehensive' package, for the greater impact.  
13

14  
15 But the study also suggests that improved access to health care and the reduction of the overall  
16 burden of OOPE especially in the most vulnerable sections of the population<sup>52</sup> are likely to require  
17 additional interventions that address gaps in the availability of care and provide patients appropriate  
18 pathways that support their journey from a strong and comprehensive primary care service where  
19 they may be informed of their entitlements and investigated for their initial symptoms to  
20 appropriate hospitals for the treatment of serious illness. Besides, inpatient care is only consumed  
21 by a small proportion of households in a year<sup>53</sup>, and this is especially true of tertiary care, while  
22 many more will seek outpatient services and referral to inpatient care, should this be required.  
23 Others have strongly recommended the strengthening of the primary care base as an essential  
24 means to universal health coverage and this study confirms their view<sup>41</sup>. Key implications for AP are  
25 to explore how best the most advantageous features of Aarogyasri can be extended to include both  
26 secondary and primary care, while those for MH may be to build on and unify its menu of currently  
27 available schemes to create an evidence-based comprehensive health delivery system. These  
28 conclusions may be applicable to other states with similar health financing schemes.  
29  
30

31 The design of health financing systems as well as their evaluations is complex and challenging, as the  
32 mountain of available evidence suggests<sup>41, 42, 52, 54</sup>. Even the ground-breaking Seguro Popular health  
33 insurance programme of Mexico which used a cluster-randomised trial design with strong  
34 government support demonstrated some but not all anticipated outcomes, contrary to  
35 expectations<sup>42</sup>, and a key recommendation was that continued assessment of the programme was  
36 needed. Furthermore, differences in data and methodology may result in even very well designed  
37 evaluations of the same programme producing contrasting findings<sup>52</sup>. Our evaluation is the first to  
38 use a quasi-experimental survey methodology - the best possible in the hierarchy of evaluation  
39 methodologies, when a randomised control trial is not achievable - to evaluate the health financing  
40 reforms in 2 large states of India. Despite that, the study has limitations which we have  
41 acknowledged. For example, this study has examined health related expenditure and behaviours at  
42 only two points in time. To establish trends, it is suggested that more than two time points are  
43 needed. However, it needs to be recognised that schemes such as the Aarogyasri themselves may  
44 not have longevity in their original form and may change or be replaced in response to changing  
45 needs and policy imperatives. King et al acknowledged that their assessment of the Mexican Seguro  
46 Popular programme (at 10 months)<sup>42</sup> was undertaken at an early stage, but it was nevertheless  
47 recognised as having provided important evidence of impacts, albeit early ones. Therefore a realistic  
48 aim of an evaluation in this rapidly changing health delivery landscape in India would be to study  
49 change over time, even if that is limited initially to two time points, but to continue to evaluate the  
50 system repeatedly, and use the evidence to reshape health delivery to be responsive to future socio-  
51 economic and epidemiological trends. In addition, the evaluation was not designed to assess  
52 provider behaviours. Many other pertinent questions such as the impact of the schemes on the  
53 overall economy of health care cannot be answered by a single evaluation. But these are recognised  
54 problems which can only be addressed through continuous assessments, as other evaluations have  
55 shown. Our study has nevertheless produced sufficient insights to enable policy leaders to improve  
56  
57  
58  
59  
60

programme effectiveness and, importantly, to undertake further assessment. Our household survey data provide a valuable baseline for future monitoring and analyses of trends in both states.

This study needs to be followed up with further and repeated evaluations as AP's and MH's schemes evolve; to assess the impacts of re-design and to help health policy leaders achieve their aspiration of universal access to good quality health care.

### Three faces of the Aarogyasri Scheme

#### The beneficiary:

Lakshamma, a 65 year old widow, is from a tribal background. She is an unskilled labourer, supporting a family of 5, with a monthly income of INR 4000 (USD 74). She was referred to a municipal hospital with chest pain and underwent heart surgery. The hospital which is a part of the Aarogyasri network provided free care and her total out of pocket expenses amounted to INR 850 (16 USD) for initial transport. In addition to the surgery, she received free food, money for transport home and follow up medicines. She is very satisfied with the service she received.

#### The excluded:

Ramulamma, a mother has a BPL card, but her daughter Lakshmi does not, as she was abandoned by her husband who is a government employee and entitled to free health care. The mother was unable to secure free care using her BPL card for her seriously ill daughter who paid out-of-pocket at a private facility where she was offered a hysterectomy for the relief of her gynaecological symptoms. Lakshmi's health care costs were met by the family selling a number of household assets and Lakshmi's daughter discontinuing her education to take up paid work. Lakshmi is severely depressed and does not speak to anyone.

#### The uninformed:

Krishnamma 43 years old, had severe stomach pains one night. Although the family had a BPL card, Ramulu her husband and Srinivas her son rushed her to a private hospital nearby, which was not part of the Aarogyasri network. They were unaware of how to access the Aarogyasri scheme hospitals which were further away from home, and the local primary health services being inadequate, Krishnamma had not had her initial symptoms investigated. The treatment was funded through a loan from a private moneylender. On discharge, she has not attended follow up, as the family cannot afford transport or medicines.

## References

- <sup>1</sup> Resolution WHA58.33. Sustainable health financing, universal coverage and social health insurance. In: *Fifty-eighth World Health Assembly, Geneva, 16–25 May 2005*. Geneva, World Health Organization, 2005 ([http://apps.who.int/gb/ebwha/pdf\\_files/WHA58/WHA58\\_33-en.pdf](http://apps.who.int/gb/ebwha/pdf_files/WHA58/WHA58_33-en.pdf), accessed 26<sup>th</sup> March 2013).
- <sup>2</sup> World Health Organization. Health Systems Financing. Path to Universal Coverage. Geneva: World Health Organization. 2010. Available from: World Health Organization Library Information Services.
- <sup>3</sup> Acharya A, Vellakkal S, Taylor F, Masset E, Satija A, Burke M, Ebrahim S. Impact of national health insurance for the poor and the informal sector in low and middle income countries : a systematic review. London: EPPICentre, Social Science Research Unit, Institute of Education, University of London. 2012. Available from: <http://www.dfid.gov.uk/r4d/PDF/Outputs/SystematicReviews/Health-insurance-2012Acharya-report.pdf>
- <sup>4</sup> Giedion, U., B. Y. Diaz . A Review of the evidence. In: *The Impact of Health Insurance in Low-and Middle-Income Countries*. M. L. Escobar, C. Griffin and R. P. Shaw (ed). Washington DC, Brookings Inst Press 2011.
- <sup>5</sup> Giedion, U, Alfonso, E , Diaz. *The impact of universal coverage schemes in the developing world : a review of the existing evidence*. Universal Health Coverage (UNICO) studies series ; no. 25. Washington D.C. : The World Bank. 2013
- <sup>6</sup> National Commission on Macroeconomics and Health. Report of the National Commission on Macroeconomics and Health. New Delhi: Ministry of Health and Family Welfare of India. 2005. Available from: Ministry of Health and Family Welfare
- <sup>7</sup> Eleventh Five Year Plan (2007–2012). Vol 2: Social Sector. Government of India Planning Commission. October, 2008. [http://planningcommission.nic.in/plans/planrel/fiveyr/11th/11\\_v2/11th\\_vol2.pdf](http://planningcommission.nic.in/plans/planrel/fiveyr/11th/11_v2/11th_vol2.pdf), (accessed Mar 26 2013).
- <sup>8</sup> Faster, Sustainable and More Inclusive Growth. An Approach to the Twelfth Five Year Plan (2012-17). Government of India Planning Commission. October, 2011. [http://planningcommission.nic.in/plans/planrel/12appdrft/approach\\_12plan.pdf](http://planningcommission.nic.in/plans/planrel/12appdrft/approach_12plan.pdf), accessed 26th March 2013
- <sup>9</sup> La Forgia G, Nagpal S. Government-Sponsored Health Insurance in India. *Are You Covered?* World Bank Washington DC 2012. doi:10.1596/978-0-8213-9618-6.
- <sup>10</sup> Agarwal A. "Impact evaluation of India's 'Yeshasvini' community based health insurance programme. *Health Economics* 2010; 19: 5-35
- <sup>11</sup> The Rajiv Aarogyasri scheme website at <https://www.aarogyasri.org/ASRI/index.jsp>, accessed 26<sup>th</sup> March 2013.
- <sup>12</sup> RSBY scheme status. <http://www.rsby.gov.in/statewise.aspx?state=35> (accessed Apr 30 2013)
- <sup>13</sup> Mahal A. Learning and getting better: Rigorous evaluation of health policy in India. *National Medical Journal of India*. 2011. 325-27.
- <sup>14</sup> Aarogyasri Health Care Trust Annual Report 2011-2012. [https://www.aarogyasri.org/ASRI/EXT\\_IMAGES/documents/Annual\\_Report\\_201011.pdf](https://www.aarogyasri.org/ASRI/EXT_IMAGES/documents/Annual_Report_201011.pdf) (accessed Mar 26 2013)
- <sup>15</sup> Rao M, Ramachandra S, Bandyopadhyay S, et al. Addressing healthcare needs of people living below the poverty line: a rapid assessment of the Andhra Pradesh Health Insurance Scheme. *National Medical Journal of India*. 2011. 24(6):335-41.
- <sup>16</sup> Fan V, Karan A, Mahal A. "State Health Insurance and Out-of-Pocket Health Expenditures in Andhra Pradesh, India." CGD Working Paper 298. Washington, D.C.: Center for Global Development. 2012 <http://www.cgdev.org/content/publications/detail/1426275> (accessed Mar 15 2013)
- <sup>17</sup> Palacios R, Das J, Sun C eds. *India's health insurance scheme for the poor: Evidence from the early experience of Rashtriya Swasthya Bima Yojana*. New Delhi: Center for Policy Research; 2011
- <sup>18</sup> Rashtriya Swasthya Bima Yojana overview and scheme details. <http://www.rsby.gov.in> (accessed Apr 30 2013)
- <sup>19</sup> Rathi P. <http://www.priorities2012.com/documents/3d-4-patreek.pdf>
- <sup>20</sup> NRHM Mission Document. [http://www.nird.org.in/brgf/doc/Rural%20HealthMission\\_Document.pdf](http://www.nird.org.in/brgf/doc/Rural%20HealthMission_Document.pdf) (accessed Apr 30 2013)
- <sup>21</sup> State HMIS data analysis, April'10-March'11 Andhra Pradesh, prepared by NHSRC. [http://cfw.ap.nic.in/nrhm/pdf/AP\\_Analysis\\_Apr2010-Mar2011.pdf](http://cfw.ap.nic.in/nrhm/pdf/AP_Analysis_Apr2010-Mar2011.pdf) (accessed May 2 2013)

- 1  
2  
3  
4 <sup>22</sup> NRHM achievements in Maharashtra. <http://www.nrhm.maharashtra.gov.in/achievements.htm> (accessed  
5 May 2 2013)
- 6 <sup>23</sup> Health information helpline. <http://www.hmri.in/oursolutions-healthinformation.html> (accessed Apr 30  
7 2013)
- 8 <sup>24</sup> About the project/scheme. [http://www.maha-](http://www.maha-a)  
9 [a](http://www.maha-a)  
10 [a](http://www.maha-a)  
11 [a](http://www.maha-a)  
12 [a](http://www.maha-a)  
13 [a](http://www.maha-a)  
14 [a](http://www.maha-a)  
15 [a](http://www.maha-a)  
16 [a](http://www.maha-a)  
17 [a](http://www.maha-a)  
18 [a](http://www.maha-a)  
19 [a](http://www.maha-a)  
20 [a](http://www.maha-a)  
21 [a](http://www.maha-a)  
22 [a](http://www.maha-a)  
23 [a](http://www.maha-a)  
24 [a](http://www.maha-a)  
25 [a](http://www.maha-a)  
26 [a](http://www.maha-a)  
27 [a](http://www.maha-a)  
28 [a](http://www.maha-a)  
29 [a](http://www.maha-a)  
30 [a](http://www.maha-a)  
31 [a](http://www.maha-a)  
32 [a](http://www.maha-a)  
33 [a](http://www.maha-a)  
34 [a](http://www.maha-a)  
35 [a](http://www.maha-a)  
36 [a](http://www.maha-a)  
37 [a](http://www.maha-a)  
38 [a](http://www.maha-a)  
39 [a](http://www.maha-a)  
40 [a](http://www.maha-a)  
41 [a](http://www.maha-a)  
42 [a](http://www.maha-a)  
43 [a](http://www.maha-a)  
44 [a](http://www.maha-a)  
45 [a](http://www.maha-a)  
46 [a](http://www.maha-a)  
47 [a](http://www.maha-a)  
48 [a](http://www.maha-a)  
49 [a](http://www.maha-a)  
50 [a](http://www.maha-a)  
51 [a](http://www.maha-a)  
52 [a](http://www.maha-a)  
53 [a](http://www.maha-a)  
54 [a](http://www.maha-a)  
55 [a](http://www.maha-a)  
56 [a](http://www.maha-a)  
57 [a](http://www.maha-a)  
58 [a](http://www.maha-a)  
59 [a](http://www.maha-a)  
60 [a](http://www.maha-a)
- <sup>25</sup> Jeevandayee scheme performance: Information received from Rajiv Gandhi Jeevandayee Arogya Yojana Society Govt of Maharashtra on May 17 2013
- <sup>26</sup> Projects and schemes. <http://maha-arogya.gov.in/projectandschemes/itdpnavsanjivani%5Cdefault.htm> (accessed Apr 30 2013)
- <sup>27</sup> Mallepeddi R , Pernefeldt H, Bergkvist S . Andhra Pradesh health sector reform, A narrative case study, Technical paper No.7 for The Rockefeller Foundation–Sponsored Initiative on the Role of the Private Sector in Health Systems in Developing Countries. 2009 ; pp 42-48
- <sup>28</sup> EMRI. <http://www.emri.in/states.html> (accessed Apr 30 2013)
- <sup>29</sup> Developing and evaluating complex interventions: new guidance. Medical Research Council. London 2008.
- <sup>30</sup> Cesar G V, Jean-Pierre H, Jennifer B. Evidence-Based Public Health: Moving Beyond Randomized Trials. Am J Public Health. 2004 March; 94(3): 400–405.
- <sup>31</sup> Presentation on Annual Plan 2012-13 and Five Year Plan 2012-17. [http://planningcommission.nic.in/plans/stateplan/Presentations12\\_13/maharashtra1213.pdf](http://planningcommission.nic.in/plans/stateplan/Presentations12_13/maharashtra1213.pdf) (accessed on Mar 25 2013)
- <sup>32</sup> National Sample Survey Organization. Morbidity, Healthcare and condition of the Aged. New Delhi: Ministry of Statistics and Programme Implementation. 2004.
- <sup>33</sup> National Sample Survey Organization. Household Consumer Expenditure 66<sup>th</sup> round . New Delhi: Ministry of Statistics and Programme Implementation; 2009-10
- <sup>34</sup> National Sample Survey Organization. Household Consumer Expenditure in India. New Delhi: Ministry of Statistics and Programme Implementation; 2005.
- <sup>35</sup> Booyesen F, Van der Berg S & Burger R. Using an Asset Index to Assess Trends in Poverty in Seven Sub-Saharan African Countries. World Development. 2008; 36(6): 1113–1130
- <sup>36</sup> Vyas S. & Kumarnayake L. Constructing socio-economic status indices: How to use principal components analysis. Health Policy and planning. 2006; 459-468
- <sup>37</sup> O'Donnell O, Van Doorslaer E, Wagstaff A & Lindelow M, 2008. Analyzing Health Equity Using Household Survey Data: A Guide to Techniques and Their Implementation. Washington DC: World Bank Institute. Chapter 6, Measurement of Living Standards. <http://siteresources.worldbank.org/INTPAH/Resources/Publications/459843-1195594469249/HealthEquityFINAL.pdf> (accessed May 9 2013)
- <sup>38</sup> Ministry of Finance. Economic Survey 2011-12. New Delhi: Government of India. 2012. Available from: <http://indiabudget.nic.in/>
- <sup>39</sup> Poverty Reduction and Social Development Department. A User's Guide to Poverty and Social Impact Analysis. Washington: World Bank;2003
- <sup>40</sup> Gertler P, Martinez S, Premand P, Rawlings L, Vermeersch C. Impact Evaluation in Practice. Washington: World Bank; 2011.
- <sup>41</sup> Selvaraj S, Karan A. Why Publicly-Financed Health Insurance Schemes Are Ineffective in Providing Financial Risk Protection. Economic and Political Weekly 2012 March 17; XLVII(11):60-68
- <sup>42</sup> King G, Gakidou E, Imai K, Lakin J, Moore RT, Nall C. Public policy for the poor? A randomised assessment of the Mexican universal health programme. Lancet. 2009 Apr 8; DOI:10.1016/S0140-6736(09)60239-7.
- <sup>43</sup> Xu K, Evans DB, Kawabata K, Zeramdini R, Klavus J, Murray CJ. Household catastrophic health expenditure: a multicountry analysis. Lancet. 2003 Jul 12;362(9378):111-7.
- <sup>44</sup> Naga Sridhar G. Microfinance institutions: Moving beyond AP crisis. The Business Line [Newspaper Online]. 2012 Dec 29. Available from: <http://www.thehindubusinessline.com/companies/microfinance-institutions-moving-beyond-ap-crisis/article4253239.ece>
- <sup>45</sup> Naga Sridhar G. Life after microfinance in AP. The Business Line [Newspaper Online]. 2013 Jan 4. Available from: <http://www.thehindubusinessline.com/opinion/life-after-microfinance-in-ap/article4273183.ece>
- <sup>46</sup> Prasad N P, Raghavendra P. Healthcare models in the era of medical neoliberalism. A study of Aarogyasri in Andhra Pradesh. Economic and Political Weekly 2012 Oct 27;XLVII(43):118-126

1  
2  
3  
4 <sup>47</sup> Health Systems 20-20. An Evaluation of the Effects of the National Health Insurance Scheme in Ghana.  
5 Bethesda: Health Systems 20-20. 2009.

6 <sup>48</sup> <http://www.jointlearningnetwork.org/programs/compare/benefits/142%2C16>

7 <sup>49</sup> Ghosh S. Catastrophic Payments and Impoverishment due to Out-of-Pocket Health Spending.  
8 Economic and Political Weekly, 2011 Nov 19; XLVI(47): 63-70.  
9

10 <sup>50</sup> Garg CC, Karan AK. Reducing out-of-pocket expenditures to reduce poverty: a disaggregated analysis  
11 at rural-urban and state level in India. Health Policy Plan. 2009; 24 (2):116-128.

12 <sup>51</sup> Rajiv Jeevodaya scheme details.

13 [http://www.jeevodayee.gov.in/RGJAY/FrontServlet?requestType=CommonRH&actionVal=RightFrame&page=](http://www.jeevodayee.gov.in/RGJAY/FrontServlet?requestType=CommonRH&actionVal=RightFrame&page=undefined%3E%3E%3Cb%3ERGJAY%3C/b%3E&pageName=RGJAY&mainMenu=About&subMenu=RGJAY)  
14 [undefined%3E%3E%3Cb%3ERGJAY%3C/b%3E&pageName=RGJAY&mainMenu=About&subMenu=RGJAY](http://www.jeevodayee.gov.in/RGJAY/FrontServlet?requestType=CommonRH&actionVal=RightFrame&page=undefined%3E%3E%3Cb%3ERGJAY%3C/b%3E&pageName=RGJAY&mainMenu=About&subMenu=RGJAY)  
15 (accessed on Apr 30 2013)  
16

17 <sup>52</sup> Tangcharoensathien V, Swasdiworn W, Jongudomsuk P et al . Universal Coverage Scheme in Thailand: Equity  
18 Outcomes and Future Agendas to Meet Challenges. Geneva: World Health Organization. 2010.

19 <sup>53</sup> Dilip TR. On Publicly-Financed Health Insurance Schemes. Is the analysis premature? Economic and Political  
20 Weekly. 2012 May 5; XLVII(1)8:79-80.

21 <sup>54</sup> Vallakal S, Ebrahim S. Publicly-Financed Health Insurance Schemes. Concerns about Impact Assessment.  
22 Economic and Political Weekly. 2013 Jan 5; XLVIII(1);24-27.  
23  
24  
25  
26  
27  
28  
29  
30  
31  
32  
33  
34  
35  
36  
37  
38  
39  
40  
41  
42  
43  
44  
45  
46  
47  
48  
49  
50  
51  
52  
53  
54  
55  
56  
57  
58  
59  
60

STROBE Statement—Checklist of items that should be included in reports of *cross-sectional studies*

|                              | Item No | Recommendation                                                                                                                                                                                                                                                                                                                                                                                           |
|------------------------------|---------|----------------------------------------------------------------------------------------------------------------------------------------------------------------------------------------------------------------------------------------------------------------------------------------------------------------------------------------------------------------------------------------------------------|
| <b>Title and abstract</b>    | 1       | (a) Indicate the study's design with a commonly used term in the title or the abstract<br><b>Yes</b>                                                                                                                                                                                                                                                                                                     |
|                              |         | (b) Provide in the abstract an informative and balanced summary of what was done and what was found <b>Yes</b>                                                                                                                                                                                                                                                                                           |
| <b>Introduction</b>          |         |                                                                                                                                                                                                                                                                                                                                                                                                          |
| Background/rationale         | 2       | Explain the scientific background and rationale for the investigation being reported<br><b>Yes</b>                                                                                                                                                                                                                                                                                                       |
| Objectives                   | 3       | State specific objectives, including any prespecified hypotheses <b>Yes</b>                                                                                                                                                                                                                                                                                                                              |
| <b>Methods</b>               |         |                                                                                                                                                                                                                                                                                                                                                                                                          |
| Study design                 | 4       | Present key elements of study design early in the paper <b>Yes</b>                                                                                                                                                                                                                                                                                                                                       |
| Setting                      | 5       | Describe the setting, locations, and relevant dates, including periods of recruitment, exposure, follow-up, and data collection <b>Yes</b>                                                                                                                                                                                                                                                               |
| Participants                 | 6       | (a) Give the eligibility criteria, and the sources and methods of selection of participants <b>Yes</b>                                                                                                                                                                                                                                                                                                   |
| Variables                    | 7       | Clearly define all outcomes, exposures, predictors, potential confounders, and effect modifiers. Give diagnostic criteria, if applicable <b>Yes</b>                                                                                                                                                                                                                                                      |
| Data sources/<br>measurement | 8*      | For each variable of interest, give sources of data and details of methods of assessment (measurement). Describe comparability of assessment methods if there is more than one group <b>Yes</b>                                                                                                                                                                                                          |
| Bias                         | 9       | Describe any efforts to address potential sources of bias <b>Yes</b>                                                                                                                                                                                                                                                                                                                                     |
| Study size                   | 10      | Explain how the study size was arrived at <b>Yes</b>                                                                                                                                                                                                                                                                                                                                                     |
| Quantitative variables       | 11      | Explain how quantitative variables were handled in the analyses. If applicable, describe which groupings were chosen and why <b>Yes</b>                                                                                                                                                                                                                                                                  |
| Statistical methods          | 12      | (a) Describe all statistical methods, including those used to control for confounding<br><b>Yes</b><br>(b) Describe any methods used to examine subgroups and interactions<br>(c) Explain how missing data were addressed <b>Method identical to baseline NSSO survey</b><br>(d) If applicable, describe analytical methods taking account of sampling strategy<br>(e) Describe any sensitivity analyses |
| <b>Results</b>               |         |                                                                                                                                                                                                                                                                                                                                                                                                          |
| Participants                 | 13*     | (a) Report numbers of individuals at each stage of study—eg numbers potentially eligible, examined for eligibility, confirmed eligible, included in the study, completing follow-up, and analysed <b>Yes</b><br>(b) Give reasons for non-participation at each stage<br>(c) Consider use of a flow diagram                                                                                               |
| Descriptive data             | 14*     | (a) Give characteristics of study participants (eg demographic, clinical, social) and information on exposures and potential confounders <b>Yes</b><br>(b) Indicate number of participants with missing data for each variable of interest                                                                                                                                                               |
| Outcome data                 | 15*     | Report numbers of outcome events or summary measures <b>Yes</b>                                                                                                                                                                                                                                                                                                                                          |
| Main results                 | 16      | (a) Give unadjusted estimates and, if applicable, confounder-adjusted estimates and their precision (eg, 95% confidence interval). Make clear which confounders were adjusted for and why they were included <b>Yes</b><br>(b) Report category boundaries when continuous variables were categorized                                                                                                     |



(c) If relevant, consider translating estimates of relative risk into absolute risk for a meaningful time period

|                          |    |                                                                                                                                                                                       |
|--------------------------|----|---------------------------------------------------------------------------------------------------------------------------------------------------------------------------------------|
| Other analyses           | 17 | Report other analyses done—eg analyses of subgroups and interactions, and sensitivity analyses <b>Yes</b>                                                                             |
| <b>Discussion</b>        |    |                                                                                                                                                                                       |
| Key results              | 18 | Summarise key results with reference to study objectives <b>Yes</b>                                                                                                                   |
| Limitations              | 19 | Discuss limitations of the study, taking into account sources of potential bias or imprecision. Discuss both direction and magnitude of any potential bias <b>Yes</b>                 |
| Interpretation           | 20 | Give a cautious overall interpretation of results considering objectives, limitations, multiplicity of analyses, results from similar studies, and other relevant evidence <b>Yes</b> |
| Generalisability         | 21 | Discuss the generalisability (external validity) of the study results <b>Yes</b>                                                                                                      |
| <b>Other information</b> |    |                                                                                                                                                                                       |
| Funding                  | 22 | Give the source of funding and the role of the funders for the present study and, if applicable, for the original study on which the present article is based <b>Yes</b>              |

\*Give information separately for exposed and unexposed groups.

**Note:** An Explanation and Elaboration article discusses each checklist item and gives methodological background and published examples of transparent reporting. The STROBE checklist is best used in conjunction with this article (freely available on the Web sites of PLoS Medicine at <http://www.plosmedicine.org/>, Annals of Internal Medicine at <http://www.annals.org/>, and Epidemiology at <http://www.epidem.com/>). Information on the STROBE Initiative is available at [www.strobe-statement.org](http://www.strobe-statement.org).
